# Supplementary material for: NFIB promotes the migration and progression of kidney renal clear cell carcinoma by regulating PINK1 transcription
Source: PeerJ. 2021 Apr 23;9:e10848. doi: 10.7717/peerj.10848 (PMC8074839; doi:10.7717/peerj.10848)
Supplement: Supplemental Information 1 [file peerj-09-10848-s001.xlsx]

## Sheet: 工作表1
ID	TCGA-3Z-A93Z	TCGA-6D-AA2E	TCGA-A3-3317	TCGA-A3-3358	TCGA-A3-3387	TCGA-A3-A6NI	TCGA-A3-A6NJ	TCGA-A3-A6NL	TCGA-A3-A6NN	TCGA-A3-A8CQ	TCGA-A3-A8OU	TCGA-A3-A8OV	TCGA-A3-A8OW	TCGA-A3-A8OX	TCGA-AK-3440	TCGA-AK-3458	TCGA-AK-3465	TCGA-B0-4698	TCGA-B0-4700	TCGA-B0-4706	TCGA-B0-4710	TCGA-B0-4712	TCGA-B0-4810	TCGA-B0-4811	TCGA-B0-4815	TCGA-B0-4816	TCGA-B0-4821	TCGA-B0-4834	TCGA-B0-4836	TCGA-B0-4837	TCGA-B0-4852	TCGA-B0-5075	TCGA-B0-5080	TCGA-B0-5084	TCGA-B0-5085	TCGA-B0-5088	TCGA-B0-5399	TCGA-B0-5400	TCGA-B0-5402	TCGA-B0-5690	TCGA-B0-5691	TCGA-B0-5692	TCGA-B0-5693	TCGA-B0-5694	TCGA-B0-5695	TCGA-B0-5696	TCGA-B0-5697	TCGA-B0-5699	TCGA-B0-5700
A1BG|1	3.19089	10.6893	26.1418	16.3036	9.90966	21.8476	8.7502	27.9399	12.2384	42.0302	4.76277	48.7251	4.86999	49.4246	11.5377	9.82757	12.8645	13.1508	9.42812	24.7392	16.9874	12.1767	5.95444	27.0625	6.64768	5.77533	24.2518	17.8645	27.7035	27.4965	13.3205	10.3818	8.15986	5.51689	16.1756	31.7824	1.51139	11.498	3.65789	7.67046	12.7255	7.51335	34.5774	9.97408	3.85546	11.3405	9.92419	24.0004	18.3983
A2M|2	1136.08	1192.36	1125.82	559.774	509.797	910.7	435.26	1430.69	311.187	669.61	491.37	359.176	339.908	413.759	397.677	424.043	778.845	327.1	854.499	1981.48	559.942	1005.64	592.543	843.336	962.805	417.379	850.13	511.326	204.173	446.181	2195.72	948.344	303.428	650.905	333.331	956.498	4593.94	332.933	2472.45	278.611	573.347	615.231	1836.23	1309.52	640.266	694.396	1529.59	467.579	500.75
AADAC|13	1.21739	0.115942	0.376812	0.115942	0.463768	0.492754	0.347826	0.828406	0.898551	0.753623	0.869565	4.2029	0.492754	0.376812	0.434783	0.898551	0.782609	0.115942	0.753623	0.637681	4.43478	0.57971	4.78261	8.28986	1.5942	2.2029	0.869565	1.24638	0.318841	10.8667	0.985507	0.521739	0.318841	0.608696	7.04638	4.43188	2.45333	0.637681	0.173913	0.231884	0.057971	1.71014	1.09275	1.9571	0.875942	0.811594	0.724058	0.405797	30.2609
AAGAB|79719	50.8401	158.302	182.639	58.7587	178.465	137.366	80.2912	158.974	228.657	218.475	158.383	188.708	145.669	71.2898	146.277	40.2406	101.153	91.376	132.307	40.7996	170.297	72.2744	169.678	164.188	77.0604	63.3949	88.7039	188.837	146.264	107.641	167.538	129.257	183.251	100.464	40.2182	148.135	70.7769	119.123	155.636	161.832	211.637	182.115	133.763	102.973	114.355	343.576	104.039	252.27	323.096
AASS|10157	13.6199	15.9082	17.2955	7.3177	4.01821	19.5612	7.57852	13.2851	7.09983	15.2378	5.00361	18.0588	4.70773	7.36151	9.4579	10.6844	11.6729	8.47887	8.33436	6.51924	25.3747	5.94141	12.7677	16.1665	9.52113	7.22337	8.02371	15.405	19.196	4.42131	13.5306	15.1787	4.01959	9.90155	10.9723	13.3229	1.82887	6.15739	14.8125	8.11495	5.6579	21.4892	25.8948	19.305	7.55739	21.1332	27.8043	38.5041	6.6543
ABCA10|10349	2.97575	3.68269	6.66054	3.03763	1.56104	3.7755	2.45067	3.96948	1.55142	3.50962	4.56856	1.89047	4.46237	1.79766	4.03219	7.40552	4.78344	2.12207	3.16848	0.714465	4.02717	1.77676	3.37124	21.5853	4.94774	2.2893	6.47826	5.23202	0.726171	1.76338	5.15217	6.07232	1.23328	0.854933	2.23662	10.5978	1.72575	0.830686	1.84657	4.20151	1.86037	2.28763	4.44398	4.93395	1.47533	2.75334	18.8712	6.03888	1.58863
ABCA12|26154	0.340211	3.11567	6.15639	0.477392	20.1983	7.67285	67.9483	1.09197	56.9844	10.501	33.7628	0.308275	8.04028	0.406058	2.48134	0.964772	0.415386	14.3094	0.553556	0.329236	0.126207	10.832	56.7287	115.014	13.2232	0.735294	1.98639	11.9178	8.09372	2.27316	0.600088	2.72169	5.09767	34.7733	0.911435	0.567274	0.137182	1.91583	0.330004	41.5902	1.74495	15.016	0.444469	1.1689	49.7636	1.06124	3.23749	0.972564	3.52831
ABCA5|23461	8.8151	17.3566	13.1816	5.06757	2.04351	19.2327	4.56707	36.5921	17.9136	19.5957	67.2338	14.7304	4.98401	13.9483	7.25989	20.6981	15.0602	37.8331	15.717	2.57762	7.71407	5.34608	31.1317	57.6762	9.33438	8.82037	6.79829	22.5967	3.84723	21.3599	36.6477	11.4085	4.42914	4.56823	10.1426	15.1393	2.19858	3.20534	8.37228	11.7948	23.7576	5.52357	16.4565	19.6371	6.41397	26.0349	23.0925	76.9216	20.3662
ABCA6|23460	4.96893	21.4631	24.8025	12.8335	16.0217	33.6266	18.8992	33.8851	1.52931	17.8576	17.3681	5.60551	30.7374	5.60023	12.0756	8.88746	11.8118	7.00645	6.21102	2.25674	18.6618	6.91383	5.37163	21.7515	40.1419	6.49472	17.2304	6.02169	3.42907	7.26788	20.1776	14.4138	3.60492	8.96073	2.59261	36.9004	0.322392	2.98535	5.77843	8.87573	9.15944	11.143	36.2708	41.1829	16.8148	10.4431	56.9027	6.20164	8.13189
ABCA8|10351	7.35831	14.2358	9.45474	5.06178	5.60032	8.94494	14.2452	35.56	2.21595	4.16331	4.1754	3.15686	5.97341	6.4217	4.14961	4.68708	6.27102	4.01182	2.91942	1.94735	9.49315	4.41714	3.1523	16.7693	13.8249	3.67956	6.59361	5.28096	1.45044	4.36207	20.8152	16.2769	1.85334	3.70669	3.21246	34.4856	1.2087	2.30728	5.19635	3.58582	9.68037	8.20575	26.8574	16.2288	3.86489	11.8273	48.2552	7.80043	5.90814
ABCA9|10350	2.65588	5.34297	9.70806	4.47094	3.40076	7.22275	3.76998	7.60931	1.04425	3.67982	2.90852	1.49488	1.88127	1.37863	3.83388	4.79178	2.41744	1.96499	2.37698	1.86328	4.55598	2.19551	5.41645	12.6063	10.59	1.74587	6.99653	4.44303	1.23877	2.03451	5.48828	4.90373	1.31704	1.49901	1.35287	11.7751	0.541777	1.77807	2.55945	2.81506	3.6108	1.78303	8.16859	14.1679	3.38573	4.18246	16.4929	3.19584	2.66413
ABCB11|8647	0.0609013	0.213155	0.153167	0.045676	0.091352	0.121803	0.138246	0.289281	0.380633	0	0.00365408	0.000304507	0.0371498	0.0304507	0.045676	0.0109622	0.0304507	0.0566382	0.0682095	0.121803	0.0493301	0.426309	0.246955	0.0316687	0.161389	0.0197929	0	0.0761267	0.0609013	0.0304507	1.61389	0.00365408	0	0.0609013	0.0609013	0.0950061	0.0304507	0	0.0225335	0.00365408	0.152253	0.0609013	0.27497	0.304507	0.152253	0.0365408	0.184227	0.0304507	0.289281
ABCB1|5243	1.69271	19.3576	30.727	10.4149	7.44358	12.2135	6.82639	19.5703	0.828125	9.90712	8.15972	3.93273	6.79818	6.22613	6.50217	6.09809	23.6272	4.66363	5.44661	1.04167	3.69661	3.97135	9.96094	16.428	25.6918	6.36241	17.6858	4.14497	3.03819	10.9045	14.3255	19.5208	5.23003	3.94965	1.12847	16.0378	0.998264	3.47222	7.64193	4.1862	5.77257	6.38021	33.2504	31.9019	17.2487	12.7483	26.7752	15.444	10.4601
ABCB5|340273	3.53405	4.05118	5.84023	2.95683	3.68358	4.54072	2.66533	4.92301	6.78104	6.57187	2.87806	4.91188	6.27058	2.89987	4.19671	6.63729	6.23988	3.9862	6.68847	5.18736	7.02492	4.14019	7.10102	15.1989	5.20961	5.64219	6.31509	9.52648	3.24967	4.84424	8.62439	4.01424	4.76368	3.25723	7.67868	5.9061	3.09034	7.77971	5.57499	4.6729	4.24967	4.74054	8.53004	9.7223	6.79617	7.04717	6.19849	5.60881	5.45794
ABCB8|11194	9.53518	30.2	50.8429	32.4902	32.7624	50.9626	33.1348	30.7853	31.7957	63.1237	17.8538	37.182	22.8759	30.1854	23.7619	34.8572	51.3929	29.769	24.1502	21.2181	26.9394	70.3704	34.5765	41.5159	21.7506	31.0309	32.4417	56.5254	44.5933	21.01	37.1845	31.4576	33.308	24.3373	30.8216	37.2045	28.2133	42.1652	43.3963	41.5942	31.7104	56.2646	45.4644	30.2118	59.443	32.2476	16.108	55.3945	43.8003
ABCC13|150000	0.320315	0.376209	0.967395	1.55858	2.39233	0.358295	1.23432	0.627015	0.68076	4.70405	3.49337	0.591186	0.289144	0.214977	4.87281	0.699749	0.64493	16.7377	0.540666	0.429953	0.98531	0.272662	0.931566	1.50949	0.365819	0.32569	15.9072	1.28664	4.29416	0.376209	0.742745	0.857757	3.4923	0.286636	1.50125	0.30455	0.268721	0.806163	0.394124	2.7947	1.98853	0.571838	0.740595	5.93407	0.342171	0.561089	1.62988	0.768542	0.483698
ABCC5|10057	45.1941	207.513	29.4845	41.168	15.3152	117.172	63.0334	33.276	79.1742	77.4364	106.9	83.2959	89.2405	17.066	76.3452	69.0302	64.6411	171.14	40.8824	113.891	178.604	47.8848	57.0548	156.197	77.2185	68.3965	61.0601	109.639	112.19	397.298	248.275	76.5041	169.609	87.129	43.6648	44.4636	77.6883	18.1619	90.1968	24.2935	358.074	38.9645	94.8205	109.91	36.4384	75.2147	36.6548	407.443	84.7123
ABCC6P1|653190	0.0179856	0.665468	1.67266	0.521583	0.899281	0.179856	2.19424	0.0359712	0.773381	0.179856	1.39712	0.593525	0.00503597	0.0719424	1.18705	0.130935	0.0179856	0.0820144	0.0100719	0.323741	0.0784173	0.166906	0.00539568	2.45144	0.161871	0.0539568	0.851799	0.473022	0.305755	1.97842	0.126978	0.701439	0.107914	4.96403	0.0359712	0.279856	0.107914	0.161871	0.0539568	0.453597	0.0899281	0.652518	0.665468	0.0359712	0.0230216	0.217626	0.539568	0.0359712	0.0899281
ABCC6|368	1.0501	6.62202	18.3284	7.66121	20.0565	5.5248	15.0972	6.05853	4.19147	2.95139	27.4082	2.05903	1.38889	0.837798	17.0769	11.8522	1.76835	1.43849	1.14435	2.72817	1.10516	5.05903	1.04167	39.7034	1.61558	0.800595	9.9375	11.2733	4.54365	30.8591	4.18006	4.6875	2.82738	29.496	1.77877	3.76885	3.33433	13.1151	2.49107	9.34573	2.77778	28.3264	19.4271	3.02579	0.580357	9.97123	9.02778	0.694444	6.4504
ABCD2|225	0.205954	0.870623	0.692754	0.90807	0.224677	0.683393	0.954877	1.75286	0.112339	0.234039	1.19285	0.262123	0.954877	0.393185	0.496162	1.5718	3.83411	0.0748923	1.62011	0.0561693	0.326905	0.0187231	1.20726	1.75023	3.8622	1.31062	0.112339	0.111964	0.0468077	0.224677	0.916682	0.692567	0.149785	0.205954	0.0187231	1.88953	0.112339	0.102977	0.634525	0.651751	0.514698	0.336267	4.60139	0.833177	3.18124	0.493353	1.0631	0.861262	0.149785
ABCG2|9429	7.95855	16.832	22.7116	8.06217	3.50529	12.6861	6.86376	6.63228	4.14462	14.5454	4.20414	1.98413	5.60626	6.10891	13.1085	6.47707	8.45326	3.49956	1.47707	3.4127	8.59568	2.97399	4.59127	18.1636	3.6164	2.18254	9.67769	7.25088	7.9806	24.1358	15.1102	22.1517	2.46693	5.42328	1.01411	13.093	0.861111	6.36905	3.04365	2.99603	7.37081	17.2081	21.2191	30.2196	4.07981	5.31305	16.81	10.4065	7.97619
ABHD11|83451	59.5623	142.806	160.077	265.379	249.461	127.832	96.3751	307.505	65.6344	555.17	130.299	170.255	271.963	63.4887	173.06	364.209	229.698	155.592	268.224	115.142	182.265	350.631	277.131	1255.12	109.49	159.938	115.421	287.492	198.459	135.521	232.994	230.617	201.18	116.533	179.728	86.6111	100.739	264.406	118.715	194.584	168.156	122.527	187.933	174.667	244.469	230.983	59.7713	140.993	338.637
ABHD12|26090	119.943	264.756	155.308	141.788	179.724	162.054	167.488	308.61	322.326	323.048	212.235	343.171	249.725	225.597	91.4531	347.923	258.962	222.746	195.978	101.625	238.063	305.462	397.075	347.346	163.096	136.419	124.289	805.757	573.225	353.37	374.672	149.558	258.763	187.39	135.22	141.88	185.982	275.022	437.386	75.6077	296.291	280.354	274.163	189.681	290.594	301.693	99.0228	366.16	277.263
ABI3BP|25890	8.358	35.0319	42.3206	32.5915	24.0044	41.1543	37.7299	70.5259	5.65784	10.4006	24.0707	26.2318	16.5538	13.5735	15.4424	24.3569	42.9353	6.45112	20.7283	2.50847	33.8389	8.91207	17.8454	20.4634	111.77	20.6434	20.8465	8.7698	7.29902	6.02758	63.749	40.9432	7.18869	5.1278	1.62643	65.8891	1.03495	3.07482	26.4017	24.219	6.24222	10.4481	100.36	55.681	141.074	46.9405	89.8028	61.654	24.5617
ABLIM1|3983	222.099	217.967	460.6	143.209	128.791	313.627	328.746	344.017	357.275	383.851	203.551	524.061	315.973	116.929	211.759	155.722	326.203	78.6733	1169.03	151.272	91.9172	332.095	439.466	282.91	216.854	224.26	224.362	378.78	123.827	39.6884	151.131	247.957	82.7047	217.544	82.7175	276.437	160.962	343.89	424.825	310.303	77.151	261.676	415.173	371.709	141.492	192.152	565.969	321.885	272.178
ABLIM3|22885	3.98216	33.0488	69.3682	44.5778	29.2249	47.9369	19.1995	49.4948	3.05579	54.9882	15.6929	3.50465	5.58532	66.3441	30.7781	5.34104	6.87132	56.1438	1.72154	0.955014	50.2058	19.5989	6.20281	46.5833	30.2732	2.76904	36.3787	71.5366	84.9585	36.7127	21.8776	88.3682	8.66147	3.68183	1.23473	45.2614	2.76451	0.807489	7.81176	31.9251	33.5951	15.3961	97.8226	112.787	6.96683	253.139	67.7766	107.372	96.3606
ABO|28	1.5852	4.07133	1.48349	2.24571	0.758917	2.50991	10.8309	3.79789	9.58322	1.51915	0.1321	0.858653	0.594452	1.02378	1.78336	0.165125	0.627477	1.25958	0.306473	1.56143	2.9967	0.627477	2.41347	2.51915	3.67635	0.990753	3.12417	3.73184	0.957728	3.06143	1.19683	10.002	0.429326	0.759577	38.7926	2.08058	30.3276	0.273448	2.32563	0.198151	0.594452	0.372523	8.70277	4.84478	2.32034	0.72325	3.56671	0.888375	6.88507
ACACB|32	9.42084	35.7314	18.2719	18.7401	8.21411	20.2636	10.1391	76.6846	26.8832	11.6909	5.552	19.7807	30.3259	35.7547	7.23462	5.47016	7.92592	8.03399	16.3665	3.39922	26.7584	5.87124	7.75282	43.7584	55.7682	5.80953	14.1502	21.928	7.05524	27.4478	36.8511	11.3754	54.1823	11.84	10.8553	46.9032	8.17292	5.70663	6.29263	22.2156	44.1145	20.7818	81.806	14.2099	12.9662	107.784	40.5069	164.15	41.915
ACADL|33	0.676519	12.4724	0.704433	0.465244	0.328407	0.465244	0.164204	3.35796	0.807882	0.222222	0.164204	43.7241	1.14943	0.246305	0.273673	10.1352	6.7827	0.383142	5.64204	0.16092	0.547345	0.215107	0.273673	2.50301	0.875753	0.0821018	0.432403	0.659551	0.738916	0.474001	3.05364	29.5785	0.0821018	0.0821018	0.437876	3.00602	1.14724	0.198139	0.218938	58.7827	1.6694	0.328407	6.68473	3.26218	0.125889	0.765189	3.10564	0.276409	1.36836
ACADS|35	29.3072	34.0853	67.7065	39.5154	41.5113	63.0171	22.6246	56.8703	37.5017	64.2184	29.1761	56.7659	41.699	54.4819	84.4983	16.7652	28.271	4.94881	23.1829	53.942	92.3918	14.8362	38.0819	22.6758	39.0717	8.56997	23.7529	71.0334	174.502	28.1126	84.3515	37.5734	31.7611	7.95222	33.372	44.1126	22.7618	7.00546	23.942	22.1809	11.7952	134.491	82.1331	32.7945	19.5222	67.7488	32.8294	6.24573	65.9181
ACAN|176	1.1327	4.39868	1.2353	0.302115	1.39693	2.51429	0.962817	1.11817	1.46247	3.08517	1.27179	1.39868	1.89008	1.59551	1.74355	5.29468	2.86091	0.540437	5.78178	1.62642	1.40634	1.1614	3.75203	3.38357	1.02975	5.11178	1.4835	2.01638	1.71543	2.20916	14.1698	0.453869	1.41239	3.00058	1.16454	3.94667	1.21613	2.21938	3.57832	0.489658	2.90135	3.39949	6.00674	1.4096	0.65466	1.64815	0.582036	0.742505	1.51545
ACCN3|9311	0.981354	0.566732	6.94308	0.613346	1.69578	0.932287	1.94112	0.662414	3.41021	14.078	0.515211	2.74289	1.96565	8.34151	1.42296	3.20412	1.32483	3.23111	0.617272	4.0422	2.96369	4.58783	9.94799	3.82728	1.22669	2.65064	4.31796	5.61089	1.39843	1.42296	4.12022	0.770363	0.711482	1.27576	1.69284	2.18646	0.932287	17.8621	0.672718	3.15505	3.42983	1.20805	2.11678	0.401865	2.69872	0.811089	1.34936	17.6384	0.912659
ACCS|84680	23.811	9.60449	26.0771	11.0693	11.4678	11.5591	7.57275	18.708	10.1714	14.25	6.05078	14.4893	15.1807	9.31445	17.7559	38.6631	15.8984	6.03564	13.3545	34.8755	17.4121	12.8384	47.73	65.21	19.7559	16.4854	13.2026	24.4375	8.31738	7.34863	34.4971	14.0303	12.1982	5.33936	20.4858	13.811	12.4092	8.59033	34.5396	27.0483	4.31104	10.8159	53.9883	17.752	11.9678	20.5103	18.1113	11.9507	26.5444
ACE2|59272	0.788417	0.172018	0.315367	0.315367	0.055906	0.129014	1.57769	0.50172	0.401376	0.200688	0.143349	1.18979	0.759748	0.0286697	0.0286697	21.748	8.06909	0.0934633	0.874427	0.52867	0.172018	1.5625	1.31881	0.157683	0.200688	0	0.258028	0	0.114679	0.458716	0.315367	0.759748	0.258028	8.71388	4.17144	0.735092	0.200688	0.415711	7.63131	0.186353	0.0573394	0.172018	0.53039	0.602064	0.114679	0.16055	0.817087	0	0.516055
ACO1|48	29.7756	68.7291	77.7589	42.461	52.0457	126.135	62.1814	147.742	79.2196	136.244	54.2628	84.5881	82.0842	72.8637	55.5156	34.3685	175.96	46.9783	42.9599	34.0301	41.388	134.341	85.2029	91.6525	42.5167	34.3983	50.8707	32.7338	90.1867	46.3927	97.7578	59.2531	48.9016	27.1433	30.3682	109.018	30.1533	11.6653	80.2737	57.0513	25.1106	63.9206	202.52	77.0287	38.976	294.808	54.2921	49.056	75.5998
ACOT7|11332	32.2668	42.6689	88.0288	26.6622	36.172	37.0765	66.0753	160.669	259.854	119.34	44.4333	216.802	242.166	67.5526	41.8091	75.1909	116.586	52.4553	180.765	189.702	97.2215	262.71	137.92	151.452	74.4541	133.493	75.7491	67.7203	34.9321	53.0269	157.962	49.3244	124.67	42.3372	74.0251	75.937	205.718	134.241	191.729	60.4333	236.792	124.867	48.6781	44.396	137.559	186.384	31.2093	42.0147	137.104
ACP5|54	6.22264	126.593	143.865	62.5132	78.5239	158.864	103.013	68.3591	67.9126	175.457	198.586	86.4503	323.921	203.709	54.0774	51.0686	490.436	46.734	161.269	63.8233	183.493	112.445	345.443	726.869	88.5893	340.387	48.7371	665.906	243.258	221.087	217.334	87.3396	332.982	187.057	22.8623	498.148	28.5252	79.0723	135.16	118.969	296.39	157.997	239.46	124.274	225.751	194.226	58.8491	1448.82	235.969
ACSBG1|23205	0.469484	0.547731	0.682707	0.274648	0.293427	0.702269	0.102504	1.01526	3.12793	0.723787	0.0805947	0.0782473	0.476135	0.586854	0.625978	0.410798	0.449922	0.29421	0.764867	1.15415	0.449922	0.449922	0.23748	0.395931	0.625978	0.134977	0.567293	0.258216	0.455008	0.176056	1.64828	0.567293	0.391236	1.17371	0.0782473	1.29617	0.782473	0.4241	1.2234	0.21518	0.410798	0.391236	0.743349	0.865415	0.433881	0.588811	1.01721	1.07864	0.802034
ACSBG2|81616	0.277778	0.222222	0.535185	0.333333	0.166667	0.296296	0.351852	0.111111	0.425926	0.296296	0.277778	0.355185	0.148148	0.166667	0.351852	0.148148	0.264815	0.203704	0.296296	0.111111	0.555556	0.12963	0.265926	0.39	0.207778	0.133333	0.388889	0.355556	0.0925926	0.481481	0.981481	0.417037	0.0951852	0.037037	0.148148	0.294444	0.0555556	0.316667	0.0925926	0.296296	0.148148	0.180741	0.335926	0.351852	0.317778	0.349259	0.351852	0.703704	0.368519
ACSL1|2180	36.4111	131.308	65.8046	111.949	25.4361	145.893	124.661	348.085	187.7	509.399	56.8453	38.8791	253.83	146.202	28.8113	106.564	132.546	42.0871	343.714	34.5176	75.8861	393.14	231.121	162.143	159.941	267.121	89.1726	57.7963	65.792	85.2016	166.808	57.0437	85.5749	126.928	5.56044	146.118	24.0927	99.323	72.1774	18.6237	114.776	40.2348	505.487	165.011	115.696	178.812	103.101	115.811	200.142
ACSL4|2182	36.9306	42.6421	39.2756	19.307	18.5022	68.0888	39.336	36.7836	192.129	61.3408	28.2041	33.9052	69.0964	12.3907	22.7444	29.5636	76.5809	19.2371	104.642	29.129	26.3583	15.0286	27.9098	40.8732	62.3317	70.2383	25.031	15.9899	20.2317	37.0052	20.8555	30.9539	10.8293	26.7876	13.4141	49.1377	29.6353	11.3275	68.463	10.6518	11.5252	35.2025	102.367	69.8625	42.2995	33.4497	49.8967	20.3975	49.1435
ACSL5|51703	31.4538	27.4497	24.3619	15.4036	15.5871	13.1596	75.6004	19.9081	28.1132	12.1203	18.0427	8.54933	20.5048	9.16703	69.3195	21.3254	153.258	5.21806	20.5982	15.6898	18.0625	16.5654	26.0789	67.8778	49.6192	95.9508	20.2734	61.7498	67.4312	8.71203	14.1098	141.767	23.3916	36.3059	9.28457	34.5642	57.8364	13.1803	17.7677	81.4414	8.50974	59.3968	103.74	31.7263	59.5787	16.5722	34.4785	16.4312	15.8317
ACSL6|23305	0.120027	1.96872	5.60286	0.746345	1.78477	5.58892	0.581775	0.986059	10.0823	2.92248	1.03706	0.366542	4.83067	6.26454	0.34002	0.709623	4.13125	0.963278	74.0224	0.469228	1.0527	0.615097	8.23971	2.62598	3.3662	33.8745	0.403944	3.20877	1.04828	2.22713	1.10609	0.549813	0.34002	0.260456	0.0323019	2.10201	0.646039	23.5355	1.96022	2.58245	0.425026	0.926556	3.50935	2.14383	1.86671	1.92826	0.629038	1.26386	0.582795
ACSM3|6296	18.9829	4.79355	10.5809	5.33935	6.61984	5.24442	5.55624	5.90888	1.82724	3.01376	3.24869	29.0869	4.72852	2.87138	13.215	33.8633	7.96203	3.68391	1.77741	3.44091	3.10869	1.35263	3.63075	16.4551	2.08828	4.14998	10.7959	5.41528	4.27148	5.76649	2.44423	7.24822	2.08828	5.26815	2.49169	6.05126	0.711913	1.92216	3.82297	4.29521	20.4556	3.46037	6.55956	7.80399	5.41054	4.74608	16.0655	8.93118	6.90555
ACSM5|54988	1.23665	2.89488	6.77178	1.71276	5.26251	4.724	0.618325	8.24283	0.112423	6.63238	3.96178	0.505902	1.18044	2.01574	7.06071	1.4317	2.14165	1.63013	0.646431	0.281057	1.50703	1.34514	1.3131	17.1551	3.64699	1.64531	1.73243	3.87634	1.10849	2.05171	4.39292	2.27656	1.63069	1.91119	1.15908	7.33277	0	0.477797	0.562114	2.00843	1.15233	2.12142	13.7049	3.01012	3.54694	2.8308	4.7448	3.82237	2.90051
ACSS2|55902	50.0856	72.4098	106.505	58.7533	61.8068	99.2218	52.1961	103.946	92.764	78.92	51.2017	170.185	81.7	50.923	48.6565	39.2933	94.9163	38.3089	136.001	207.643	62.7555	81.4645	147.073	91.3599	58.275	19.2557	58.5154	93.8649	103.841	84.799	115.594	70.9382	89.0287	68.8444	32.6431	93.2356	163.724	22.8176	134.792	60.7276	38.9047	89.8463	127.948	74.7257	55.7819	138.095	71.4831	113.258	69.46
ACSS3|79611	20.7426	27.672	27.4046	2.997	29.8518	19.7905	31.6207	60.9008	3.21179	33.2584	26.7199	7.46254	13	45.9524	19.3873	32.3943	3.21745	21.5864	17.8352	2.4309	13.4632	11.1732	180.36	99.5108	6.92441	7.45388	14.648	33.1685	27.8132	41.5485	88.2131	8.10689	27.8455	18.6647	28.349	11.4555	6.85614	1.004	3.82151	19.4436	59.1585	10.1079	44.4985	18.3237	3.1332	140.467	22.9384	32.2614	66.2997
ACTA2|59	3357.58	1726.65	2134.01	1015.94	582.97	2318.77	1040.5	1408.29	375.365	1305.57	505.158	165.175	659.988	389.15	665.252	3323.19	1326.79	936.534	3639.33	1108.56	1377.27	2414.53	968.589	913.302	426.164	509.418	2683.35	596.141	455.8	443.419	1785.54	1932.59	320.497	1813.57	219.3	2555.52	141.196	585.294	1059.14	301.617	398.62	1877.68	1861.31	3391.7	224.278	605.089	2341.81	187.177	549.926
ACTBL2|345651	0.799574	0.0710732	0.355366	0	0.0355366	0.533049	0.177683	0.21322	0	0.177683	0.148543	0	0.461976	0	0.10661	0.458778	0	0.10661	0.148543	0.675195	0.248756	1.72175	0.686212	0	0.0710732	0.266525	0.248756	0	0	0.0355366	0	3.03625	0.0355366	0.0337598	0	0.479744	3.32409	0.0426439	2.30455	0.248756	0	0.177683	0.621891	0.704691	0	1.91898	0.604122	0.0355366	0.10661
ACTG2|72	738.338	453.451	112.205	78.7588	23.8955	109.627	48.0621	237.768	10.055	54.9411	10.3449	418.167	74.1744	30.436	21.894	218.395	83.9199	31.5499	11414.3	219.452	27.7745	10.5263	26.4415	40.7384	15.1218	105.637	217.645	44.2537	8.92066	14.5326	188.408	203.782	24.2734	147.317	13.1579	183.796	9.61901	47.1453	569.152	30.52	21.4768	889.138	49.3244	133.47	6.37706	17.4163	380.486	2.74705	14.8162
ACTL6A|86	103.509	123.02	220.75	111.385	100.158	233.658	276.417	258.61	510.424	187.991	154.448	668.668	430.842	110.394	111.651	171.729	173.015	151.908	535.737	210.185	160.676	80.6604	169.094	211.619	103.586	340.595	84.6153	155.469	180.579	178.186	152.074	187.808	222.134	133.532	122.456	107.431	364.001	211.814	357.622	175.757	217.473	208.681	174.635	177.427	173.48	252.433	108.281	233.743	198.867
ACTL8|81569	0	0.105932	0.105932	0.211864	0.317797	0	0.0529661	0	12.3591	1.48305	0.0529661	353.828	5.10169	0.0529661	0.317797	41.6923	0.0423729	0.0137712	6.33422	0	0.0556144	4.60275	0.157309	1.45233	0.185381	494.957	0.688559	0.201271	0	0.0529661	0.264831	0	9.61176	10.9317	310.689	0.423729	0.942797	0	1.77807	1.06568	0.847458	0	1.64195	0.00158898	0.588453	0.0529661	0	0.0497881	0
ACVR1C|130399	0.0688547	1.86482	0.246729	0.72963	0.367569	0.137709	0.18935	3.74111	0.459031	0.172481	0.103282	0.281157	1.13071	0.447556	0.126234	0.321322	0.918063	0.259582	0.362061	0	0.764173	0.0573789	0.242254	3.51974	3.39855	0.390177	0.430227	1.423	0.0459031	0.4028	2.84599	0.0750516	0.149185	0	0.556576	5.15756	0.0813633	0.368602	0.200826	0.183613	1.39373	0.327863	7.3204	0.494033	0.65412	0.398784	1.11315	2.36126	0.60902
ADAD2|161931	0.406548	0.159163	0.507503	0.113688	0.0909504	0.277854	0.257844	1.04593	4.27967	0.345612	0.0909504	0	0.227376	0.0682128	0.181901	0.0554798	0.278308	0.0909504	0.438381	0.227376	0.159163	0.272851	0.141883	0.204638	0.159163	0	0.295589	0.0541155	0.272851	0.295589	0.591178	0.227376	0.181901	0.0454752	0.227376	0.521146	0.0227376	0.136426	0.17417	0.0682128	0.932242	0.00636653	0.363802	0.240564	0.392451	0.0682128	2.54661	0.00545703	0.295589
ADAM12|8038	9.28329	136.719	327.016	64.2141	126.362	1405.29	550.463	159.183	45.1431	365.43	282.341	44.9831	72.342	18.1136	249.151	63.9787	124.18	102.808	41.1618	80.2155	319.991	307.229	55.8957	92.113	162.702	117.183	234.613	39.5885	185.746	61.5721	89.6808	149.697	30.5423	167.09	12.7433	603.804	11.7593	82.9825	84.0622	50.2506	27.6869	254.924	409.438	333.268	92.0254	89.5105	110.816	16.8414	186.892
ADAM19|8728	1.11497	37.8375	33.3351	10.3115	23.7866	81.5256	45.6204	43.764	41.9134	106.107	46.3527	45.9673	67.9181	16.0627	25.4855	65.469	147.477	34.8304	41.0492	18.8139	45.2023	58.3763	33.3547	27.0273	95.4811	55.3061	31.6433	18.1999	19.002	9.2296	18.2016	18.502	15.0553	40.6116	9.92852	88.9174	16.2053	32.3018	66.4073	19.2495	11.4134	36.3102	86.9373	46.916	92.3742	20.9221	13.6864	13.2519	29.3122
ADAM33|80332	2.26378	9.97592	16.9588	12.2215	9.50401	30.786	15.084	9.52648	3.72873	13.152	4.65757	4.04227	4.44355	3.47673	11.504	4.13751	6.80899	10.1841	3.89888	5.42376	8.15623	17.2836	4.11343	14.0974	7.39754	3.40396	20.6602	8.10701	17.076	8.99732	16.343	19.4521	2.39326	2.916	2.60835	21.8395	1.41787	3.99893	6.78598	3.4687	8.55805	13.7849	18.3408	26.2456	6.50776	5.86891	31.0936	4.43606	8.45746
ADAM8|101	1.35361	11.7383	6.82152	11.2801	14.2052	11.2082	76.1541	9.44184	18.3255	49.8496	35.7457	14.8396	63.4522	16.7781	7.8877	11.0515	96.0612	6.80749	39.7457	13.9873	35.6414	12.0805	20.7821	72.7403	33.0548	44.5598	10.4442	31.2012	51.7313	12.2828	6.88971	12.6671	60.8623	20.6287	27.4525	18.7667	12.617	14.5999	50.7991	19.619	7.25267	39.8182	73.6949	24.7286	32.9017	15.868	4.29479	11.1237	17.8092
ADAMDEC1|27299	0.191652	7.6448	2.0856	3.08773	4.8339	3.42845	5.2385	6.89949	11.6248	2.27853	8.92249	4.57836	24.069	0.596252	1.53492	23.8501	88.8198	4.73211	31.6141	1.89523	9.68697	7.15503	35.8816	59.8169	90.2619	70.1972	0.340716	1.23509	3.10903	11.9676	2.83518	2.04429	14.8637	4.74872	0.936968	3.66695	5.94123	1.40545	37.2027	6.02641	0.255537	5.49915	26.4033	5.51533	99.2428	6.34583	2.78961	9.3569	11.7739
ADAMTS14|140766	0.270898	5.71878	10.4628	0.399897	9.25361	21.6548	10.5986	4.55237	12.9097	25.9739	16.1416	1.81889	4.20227	0.554696	19.5609	2.88132	8.27322	5.21207	5.50774	3.81837	10.2632	11.3609	4.74303	4.73891	3.16589	7.68034	22.7252	4.28277	8.56553	4.0565	3.39525	4.92776	2.55418	4.6339	4.33308	34.5756	1.21259	9.63106	11.2603	3.62487	1.90351	14.6672	18.6339	6.49149	4.5743	2.89499	3.05728	1.48891	11.0279
ADAMTS18|170692	7.98385	5.53249	3.06105	1.57542	1.09807	13.1946	15.7783	1.59078	27.4663	1.02875	15.857	3.0831	7.2371	0.827491	9.07247	1.03269	0.910989	0.502166	2.58369	3.75384	4.03545	1.00433	0.598267	6.12288	2.57976	0.452934	3.66522	2.12722	2.76329	6.31902	1.79204	1.3781	13.6191	2.24498	1.41394	5.55258	0.354076	0.543521	4.06459	0.886176	11.0575	3.23159	10.0035	4.38007	2.06144	2.22332	3.10358	114.52	2.51792
ADAMTS1|9510	50.9246	77.4069	37.6908	41.9929	19.3062	51.1398	22.251	118.746	12.8233	37.9951	21.212	76.7351	330.671	29.6156	21.0889	65.2105	43.7692	21.7957	31.4794	123.674	83.8696	31.5493	22.7353	93.4201	46.1636	45.749	63.721	38.8863	23.1011	48.7278	104.757	98.5375	9.44283	36.3623	4.85032	61.1435	22.1529	19.6912	71.8767	10.5657	20.0704	21.0227	107.218	118.704	58.8726	40.9914	181.042	89.4754	46.8901
ADAMTS3|9508	6.7145	3.11594	4.22738	1.8559	1.77142	5.69982	4.1417	4.45357	5.929	4.28011	1.86159	5.87328	6.27741	1.0006	2.27831	9.54314	4.96615	0.830737	10.8652	5.01498	1.75105	15.3757	1.07849	1.88736	3.68904	2.83104	1.82684	2.96525	0.61414	1.62552	2.36968	3.59736	0.868784	1.99161	4.86818	4.68724	2.97933	0.509287	14.2912	2.35171	1.39305	1.503	7.3574	4.54943	1.93229	2.80917	6.41102	1.55692	2.83343
ADAMTS4|9507	8.38544	56.3371	52.844	12.5474	26.646	89.0292	104.203	62.1525	40.0578	68.8754	25.0929	69.2517	58.3001	20.3795	31.9306	109.953	82.8606	32.9212	52.5452	173.069	61.3186	52.586	39.0402	99.1908	71.9799	334.978	57.2891	74.0634	29.887	33.1365	90.4918	66.193	85.6952	69.995	19.85	95.1387	71.7928	83.6152	78.8613	123.296	19.0847	53.3685	98.9978	61.5797	85.1833	38.8271	49.1642	17.6227	48.4805
ADAMTS5|11096	3.87975	10.8425	15.2212	2.9941	2.29101	34.4129	14.8537	8.51392	6.60406	11.3587	4.80482	4.00186	67.6859	3.67029	5.52634	6.31657	2.67381	4.33903	1.94515	4.26296	10.2838	4.11311	2.26275	5.8812	3.3502	11.5468	7.6054	2.41509	4.84467	1.51185	3.10049	7.57601	1.37535	9.24206	1.65642	19.2719	4.49695	7.9585	4.70144	2.7212	1.40402	5.49571	9.18959	14.5422	1.9495	2.76477	22.0455	1.72731	2.80006
ADAMTS6|11174	0.180393	4.27306	3.23591	0.53807	1.66323	9.58398	4.69897	2.09705	3.70914	4.39963	2.66337	0.990959	0.798277	0.536799	2.88925	1.68357	2.05495	3.04351	1.03094	1.05947	3.10835	3.21938	1.39313	3.22192	2.75392	1.49032	3.88318	1.35174	1.14748	0.487357	0.954231	1.99181	0.932335	1.31374	1.82526	5.04704	0.254273	1.5344	2.12813	1.4762	0.776946	1.90747	9.81127	2.46433	0.948157	2.33352	1.139	1.25908	4.1205
ADAMTS7|11173	20.6105	12.4439	13.3686	3.35364	9.46785	35.227	14.6844	11.6218	18.881	34.9783	12.7115	68.5166	13.4433	4.83136	9.89538	9.50085	14.9075	5.7586	7.42611	30.9825	22.879	19.2138	8.20446	7.96024	8.89199	11.4109	11.2826	7.26227	17.912	7.29752	7.20023	7.38409	5.88127	18.4681	4.72955	36.0908	1.94896	16.7437	12.3793	3.60575	6.9859	10.6317	27.96	17.727	8.75268	3.84574	4.36238	6.9828	11.4326
ADAMTS8|11095	0.455466	2.44602	3.40418	2.14879	6.611	2.7635	0.581646	1.50135	2.27733	0.168691	0.303644	0.101215	0.320513	0.792848	2.36066	0.540823	1.24831	0.392038	0.354251	0.168691	0.438596	0.472335	0.491903	1.06174	3.57321	0.168691	5.28509	1.29892	0.590418	0.737179	5.42982	3.87989	0.202429	0.320513	0.307355	3.84076	2.37011	0.236167	0.770918	67.5172	1.41599	0.952767	4.48718	5.67476	1.33704	1.93995	18.2088	0.508772	1.75607
ADAMTS9|56999	65.9665	19.3924	17.1286	7.53138	8.11224	11.8246	10.3176	18.4857	8.17719	12.5134	6.56558	12.2294	21.3846	9.11406	8.78661	8.89576	37.5012	6.44079	31.3826	32.085	16.1073	8.1217	7.29252	15.8637	16.3999	17.2922	11.5327	8.54102	4.24777	6.3944	19.0673	17.8112	4.97544	12.408	4.52065	22.2196	6.14935	17.6725	29.8501	4.85319	13.2949	6.48608	80.0468	27.4532	13.8139	26.4042	20.0018	9.86647	24.759
ADAMTSL2|9719	2.97941	12.9281	18.5995	5.68904	8.4877	66.1636	31.3342	18.5532	54.4537	53.9193	7.56096	5.44626	7.29813	5.55882	13.1104	26.0198	14.1551	6.48262	9.65775	10.8201	31.431	21.6104	15.242	17.642	9.42193	12.4824	18.6163	18.5422	13.2583	13.0102	16.0219	10.5075	7.11952	13.2118	9.99465	31.7596	4.82968	15.3332	8.13556	5.72701	6.96925	16.8561	36.1741	20.5176	9.99064	5.78717	4.64198	9.57674	11.3971
ADAMTSL4|54507	12.4554	17.4745	20.4319	6.09478	8.22783	10.3449	13.0519	11.08	1.46232	14.5197	8.97855	4.5971	33.6809	4.2029	10.8214	9.94754	34.6945	4.98261	20.1797	1.65217	11.9652	4.53188	14.2814	19.1832	14.7064	23.8641	42.5951	93.0481	15.2725	5.71391	22.0942	24.8774	6.79913	12.7597	3.62522	19.5864	8.56203	3.92116	15.3119	6.30435	1.65913	23.9699	18.8896	12.2945	12.22	6.42435	20.1023	7.56464	8.37594
ADAP1|11033	2.43669	5.68562	21.3368	4.73626	26.4534	8.19064	13.1476	65.0363	93.6713	32.5323	38.7812	3.01147	64.1046	17.3115	20.5733	3.914	16.666	1.74582	5.29766	2.24558	31.0822	36.8371	12.0258	45.5834	9.97707	10.2179	17.2704	42.7496	34.6426	10.3679	75.6049	6.71381	14.3316	4.06116	15.678	9.53464	12.3029	4.96847	4.6818	22.9981	33.6479	36.4013	21.5948	8.63593	14.2413	40.3827	9.64883	48.2322	25.6971
ADAR|103	169.482	681.968	643.52	195.438	234.509	423.719	430.213	349.83	440.03	1009.5	507.9	803.831	380.243	324.812	151.033	158.972	650.489	322.677	584.612	138.154	265.854	255.174	854.339	442.793	448.303	850.638	139.578	559.119	451.176	374.478	294.013	357.699	599.453	505.76	216.254	299.57	313.85	270.935	370.803	704.762	290.416	582.253	469.153	436.019	300.869	561	248.948	1054.29	284.405
ADAT3|113179	4.37257	1.64621	13.3225	7.23544	6.90357	8.93738	4.79524	4.37257	4.91046	14.2855	3.45085	9.22041	12.2943	3.32624	7.37696	9.07765	3.04258	1.83845	1.88854	5.74577	1.55354	15.2386	1.48779	5.67752	3.15153	1.33751	6.15216	5.85598	11.2962	2.76456	3.11709	6.45773	2.17157	3.76581	4.3757	3.78647	2.07264	5.95679	2.96619	8.20038	1.46337	1.54415	9.86725	2.34753	3.17282	0.991234	3.87226	1.33563	8.1722
ADCK5|203054	7.15713	11.0891	19.6269	16.7608	28.6836	20.5967	16.0556	27.3871	41.3434	27.5491	13.5216	11.2295	26.933	13.4984	28.3035	56.4509	34.3936	22.1404	33.3213	9.44924	20.2862	17.1706	11.7192	28.1447	14.6668	19.7781	30.0837	27.4487	15.2711	21.9492	28.4217	13.8639	45.4584	7.4757	42.2451	16.2365	15.926	80.2138	14.9125	14.5486	47.1749	10.1382	15.0702	17.2964	30.4033	9.3067	6.07397	15.5335	27.344
ADCY4|196883	3.09735	17.6401	15.2251	6.12094	6.441	7.53687	5.17994	18.0354	6.0472	12.8681	5.7705	4.89676	8.2649	6.0767	5.60472	11.3569	9.92153	7.93864	4.38378	3.27434	12.4855	5.14749	12.5032	17.7265	13.5829	6.22773	14.2174	20.6224	3.6469	6.04336	18.9378	12.6817	4.60177	4.69027	2.35988	15.0448	1.32743	7.6	10.2242	4.69027	15.6791	11.6909	28.8263	15.0696	10.5209	9.90413	11.2389	10.018	6.83835
ADCY5|111	5.14043	32.8527	77.1598	21.6172	7.37448	7.56887	1.96869	24.1395	1.02862	13.3855	41.6482	0.450209	1.43411	5.52654	4.40996	1.5653	2.9517	1.47078	3.57156	0.178891	7.43321	5.8715	0.176804	62.0343	19.1404	0.911449	2.59392	1.23077	0.730471	71.7633	60.3933	3.72689	60.0859	26.7406	0.204234	13.7731	0.193798	0.566488	1.19261	1.13298	30.2621	21.2901	43.8465	5.36315	27.0799	51.4067	24.3184	1.03071	1.99761
ADCYAP1R1|117	0.15873	1.65079	2.4127	0.285714	0.380952	1.26984	1.04762	0.387937	4.85714	1.11619	0.253968	0.349206	1.0781	1.2381	0.412698	0.031746	0.444444	0.190476	0.190476	0.126984	0.730159	0.126984	0.0374603	0.422222	3.31238	0.380952	0.412698	0.0952381	0.126984	0.444444	1.52889	0.857143	0.0634921	0.634921	0	2.8254	0.0634921	0.47619	0.126984	0.285714	0.924444	0.507937	1.84127	1.01587	0.739683	0.705397	1.49206	1.96825	0.666667
ADD3|120	90.4814	60.2958	207.501	35.8851	32.9471	160.663	90.8469	57.8191	115.583	117.526	72.3685	68.365	78.8848	69.7683	37.169	40.2168	84.0711	41.003	61.5263	25.7086	90.8713	31.6902	81.3916	35.6893	108.283	53.5529	29.6371	9.82634	23.5294	57.28	109.848	61.6179	23.0263	36.1359	30.5228	87.0156	21.1221	10.1431	24.3625	23.2448	69.0427	49.1273	89.3862	90.6566	56.8203	32.6191	175.297	24.1345	44.6678
ADH1A|124	0.32658	2.30794	0.931929	2.47164	0.60778	0	0.405186	9.64344	0	0.162075	0.0405186	0.162075	1.45867	1.37763	0.0405186	0.203404	0.28363	0.324149	0.328201	0	2.30956	0	0.121556	3.20097	8.58995	0.202593	0.484603	0.0810373	0	0.121556	6.1718	0.162075	0.0810373	0	0.567261	14.5656	0	0.0210697	0.28363	0.0810373	2.95786	0.769854	14.8703	1.62075	0	1.39627	1.53971	0.36872	1.17504
ADH1B|125	12.9204	102.583	12.852	71.6207	15.9089	0.422752	9.0123	423.576	0.153728	1.42198	1.66218	10.4558	59.1284	37.2686	3.13336	19.3974	10.9723	15.0269	9.97733	0	87.9808	0.153728	1.92852	178.554	239.027	2.42852	61.9243	5.47194	0.038432	3.15142	205.317	17.5404	0.28824	0.153728	2.07341	494.964	0	0.1495	17.5419	8.3186	116.106	31.4408	671.934	79.7018	11.4335	46.6714	83.4108	28.015	35.1268
ADH1C|126	2.23781	1.33601	5.24449	4.39279	0.601202	0.801603	0.334001	15.7468	2.87241	4.39011	0.701403	0	3.60721	2.33267	1.53641	0.975284	0.668003	0.835003	0.0668003	0	2.30461	1.1356	20.2685	5.79492	4.28925	0.200401	4.77422	0.200401	0.0668003	18.6954	5.72612	4.69606	0	3.17301	98.6293	13.994	0	0.0668003	0.634603	1.26921	5.30127	1.80361	11.7201	5.89178	0.634603	2.42685	13.022	1.501	24.2766
ADH4|127	0.462963	0.438596	0.595029	0.438596	0.378168	0.121832	0.270955	0.877193	0.268031	0.462963	0.204191	0.438596	0.439084	0.170565	0.278265	0.706628	0.584795	0.268031	0.492203	0.511696	0.807992	0.219298	0.659844	1.27096	0.779727	0.438596	0.699805	1.04776	0.316764	0.194932	0.657895	0.365497	0.389864	0.121832	0.609162	1.55945	0.146199	0.316764	0.413743	0.584795	0.682261	0.682261	1.09649	0.146199	0.498051	0.511696	0.852827	0.961501	0.268031
ADH6|130	0.0790843	0.0520291	0.520291	0.28616	0.338189	0.130073	0.130073	0.312175	0.28616	0.16129	0.0520291	1.14464	0.468262	0.0780437	0.494277	0.260146	0.156087	0.130073	0.494277	0.156087	0.0520291	0.130073	1.71696	0.765869	0.182102	0.182102	0.312175	0.239854	0.364204	0.104058	0.137877	1.40479	0.104058	0	0.425078	0.156087	0.104058	0.364204	0.182102	0.442248	0	0.235172	0.234131	0.494277	0.0520291	0.394381	0.988554	0.312175	0.130073
ADHFE1|137872	5.46055	6.58316	12.3902	6.82836	27.129	6.15352	5.94616	10.9542	3.78465	6.18337	1.89232	3.42324	1.41791	4.26439	21.9616	10.0293	29.2084	3.59968	6.34328	1.12313	14.1871	1.51919	9.60021	47.0416	7.70949	9.40832	13.831	16.9776	11.1674	9.2484	14.1962	7.16951	5.11727	0.66951	6.83369	16.1748	1.78571	0.586354	3.97122	10.2079	21.2148	11.2249	15.4099	10.0229	7.48934	10.1546	16.0181	24.1461	9.48827
ADIPOQ|9370	6.5449	77.9095	1.95228	42.1421	14.303	0.770065	6.31193	247.325	1.62646	1.80998	1.45336	6.64425	27.672	11.6451	1.5282	6.70477	4.88069	9.90889	12.5714	1.37744	37.8748	1.21605	2.26681	124.839	144.182	3.77332	10.4688	4.89826	0.596529	1.81063	218.395	1.52928	1.52928	0.986985	2.24512	236.256	0.609978	2.31193	7.85857	7.86356	54.4102	14.4119	614.07	21.6631	8.62256	23.1067	35.1833	20.3048	16.8297
ADIPOR1|51094	127.705	401.198	736.306	239.131	246.213	532.753	376.153	490.554	394.201	876.582	423.007	787.67	447.719	471.778	210.38	361.083	441.661	415.346	551.618	530.251	586.093	494.59	383.832	882.007	227.008	288.158	189.116	651.485	467.574	847.406	575.545	566.099	535.681	416.02	391.715	327.992	342.136	271.754	247.402	676.311	709.521	726.39	582.163	560.61	430.965	840.281	259.728	1111.95	399.233
ADM2|79924	8.33736	10.2622	24.2044	11.6696	9.42557	8.09642	13.1066	7.40696	14.7511	27.7888	14.754	21.2789	59.8212	16.2745	6.21218	16.9744	33.8076	6.08917	41.6646	22.494	13.0483	61.5297	60.754	16.9309	11.7774	33.4473	5.41034	61.7066	6.0899	12.4309	8.71798	12.2917	10.4734	19.1397	36.6916	9.56984	6.07661	56.2924	37.7796	19.1638	6.2941	26.0418	7.72088	14.0106	37.7356	26.8221	10.543	10.4923	10.0684
ADM|133	5.94121	14.5528	9.50594	6.09756	4.66291	9.13071	22.4515	30.5191	63.0863	16.3446	4.87805	5.15947	19.2933	8.70106	10.2251	135.313	32.8956	20.3102	14.8843	27.7361	16.9537	137.467	28.6792	13.7899	5.79049	17.1357	41.2552	23.4803	49.7467	17.3859	9.85866	22.6742	3.68981	36.0569	254.454	25.3189	36.9531	131.721	38.2645	4.87805	13.5084	3.66604	35.1388	50.9506	8.47405	7.25453	13.5397	5.40901	22.7311
ADORA2A|135	4.11977	107.283	43.4936	62.7363	6.77251	21.7544	7.51527	15.7962	12.9337	11.922	6.37058	6.99357	15.0117	3.59847	10.3834	19.3738	40.3139	130.665	24.0671	6.10048	307.555	5.04381	154.277	12.83	147.805	17.4068	37.5936	20.3288	14.6483	269.52	11.338	20.5048	6.16961	29.9727	25.631	12.6897	6.97347	31.4216	82.6371	22.6085	10.1371	11.4164	33.5884	59.1045	80.4309	9.19453	4.55305	19.176	117.071
ADRA1A|148	4.07971	3.81174	4.71883	2.02934	3.07726	3.91198	2.8088	10.4846	6.77066	4.67433	2.73594	4.56479	3.84645	2.73007	3.56968	6.62249	5.8665	3.88068	9.13056	7.75648	7.64939	2.77946	6.71002	15.1232	3.49584	5.18729	4.31883	10.2826	2.53888	3.81418	8.25819	3.2132	3.47775	3.47139	12.2601	4.72567	2.17604	7.32861	5.50611	4.03667	4.73692	5.35501	7.54425	5.49927	5.50905	5.46895	4.15403	5.05868	5.74914
ADRA1B|147	0.261444	0.858275	1.27641	2.72887	3.87104	0.691461	0.462148	2.94366	1.33935	1.35211	0.556778	0.484155	0.876761	1.45246	2.10079	1.76056	0.641285	1.71655	1.77553	1.12236	11.8055	0.857835	2.87236	3.92386	1.42738	1.63996	0.418134	0.902289	1.25528	3.14349	2.17077	0.512324	1.18838	1.53565	1.06734	1.65537	0.286092	0.702465	27.8944	0.56206	2.44762	32.6761	1.40845	15.717	0.704225	2.32835	0.665933	1.58627	0.506162
ADRA2A|150	0.887118	37.7552	35.1826	30.64	19.0123	201.129	37.8452	20.0959	4.32785	30.8794	11.1471	2.51196	10.2456	256.418	48.8619	6.46747	19.4592	33.35	3.13911	1.16997	61.8275	31.0887	43.0486	47.6637	15.5207	13.7529	36.5132	79.7557	67.5706	6.16611	14.5274	33.865	4.25071	14.1923	0.74595	26.6889	0.925688	1.76318	5.77295	12.6318	4.08151	63.7138	43.9658	55.9645	32.5536	8.94677	37.7552	32.289	38.6827
ADRA2B|151	0.32573	1.43613	2.13838	1.80718	0.82208	0.471411	1.88869	1.93461	8.49605	0.881995	0.335158	5.43035	3.97172	0.938869	0.927007	3.52889	4.38473	0.6691	5.96137	11.0359	1.26369	0.243309	1.2649	1.07968	0.0912409	4.08029	1.809	0.832725	0.456204	1.42944	1.09489	0.614659	1.86953	0.725061	1.40389	1.6691	2.13717	1.5663	0.442214	0.497567	3.04775	0.501217	1.48023	1.08212	0.273723	0.485706	1.51673	0.395377	1.1542
ADRB1|153	0.279525	0.279525	0.281971	0.109364	0.160028	0.541579	7.31202	0.679245	0.139762	0.314465	0.331936	0.0059399	0.419986	0.0174703	0.139762	0.110762	4.33892	0.139762	2.33788	3.49406	1.74319	0.104822	0.781971	0.67645	0.436758	0.810971	2.0601	3.00769	0.244584	0.244584	1.25332	12.4878	0.104822	0.104822	0.104822	0.663173	0.279525	0	0.384347	11.557	0.209644	2.23166	1.51957	0.349406	0	1.19602	2.30608	2.70335	0.0873515
ADRB2|154	5.11313	3.43778	5.10526	5.95967	2.16183	5.96606	5.90408	8.66011	0.196754	2.27693	2.06591	2.16429	2.47713	3.02951	4.61535	1.08214	4.08706	2.07132	1.20512	0.196754	4.37826	4.95425	4.16331	4.98721	3.909	3.03148	7.63256	5.67929	4.18101	2.75012	2.60207	9.01869	0.686178	4.32858	2.99606	9.01918	0.196754	0.614855	3.87359	24.1279	1.50025	2.70536	9.07182	8.02804	3.54156	4.34924	16.3064	14.0295	6.13035
ADRBK2|157	19.462	17.6844	50.6477	22.7461	18.0941	49.848	14.2315	25.3343	42.1583	42.8736	15.1017	25.9518	32.9861	6.13417	19.3844	16.4539	28.0434	31.6592	33.0248	18.9577	22.0569	18.5348	35.1058	38.4867	41.285	15.4761	10.7663	40.1245	22.6238	28.4739	25.9361	12.2035	10.8099	27.8927	18.9655	25.0673	10.7394	17.0022	29.0928	32.3608	51.3868	45.5426	54.4991	30.3054	28.6681	51.7468	43.0183	43.2185	18.6434
ADRM1|11047	151.832	186.608	265.14	163.375	228.352	247.852	279.158	2124.32	579.317	489.349	157.032	541.837	658.372	501.836	154.699	538.586	483.923	262.955	508.289	619.367	288.03	339.664	582.647	541.559	247.785	647.731	295.805	483.471	307.9	186.42	396.346	169.159	807.26	243.754	452.953	328.564	407.793	370.247	781.392	143.399	413.003	248.594	380.348	225.398	460.441	230.635	111.413	356.619	497.085
ADSS|159	130.481	200.948	334.476	162.991	225.765	240.829	278.866	334.917	166.954	400.059	263.494	235.144	313.577	157.875	193.382	151.047	198.199	115.843	606.502	194.519	194.995	164.742	353.893	512.353	136.146	213.192	95.6154	379.006	231.377	198.222	204.545	335.456	394.152	282.887	364.533	135.184	214.081	134.86	333.959	573.238	202.907	496.731	287.538	316.368	269.587	294.811	150.688	325.961	248.282
AEBP1|165	305.648	1501.21	1644.07	574.729	1757.01	7784.93	2091.83	1140.98	472.663	3994.83	1090.16	311.109	629.394	256.355	1709.82	1513.53	1481.86	1037.08	507.851	1038.74	2618.74	2425.87	1009.04	913.272	869.724	939.752	2084.28	844.658	2841.91	522.563	883.146	1012.49	497.039	2172.75	526.878	4992.17	106.101	1073.46	1187.66	558.079	310.595	1805.36	3141	2607.23	438.239	515.515	505.692	124.96	798.108
AFAP1L1|134265	4.60867	22.8784	19.6158	8.1538	9.8991	16.7439	12.6899	20.1513	16.0731	21.8435	11.7128	9.47641	36.0226	11.5825	11.463	17.7063	10.7232	10.6368	12.447	7.6084	18.9294	9.87865	12.6558	21.3294	15.3949	13.3826	12.3365	10.3799	5.87674	12.2852	17.7423	18.5312	9.95364	10.8263	4.99864	22.8047	11.7807	19.9002	12.0567	6.20398	30.694	13.7848	32.4775	18.7008	12.9266	13.9997	14.0851	13.6215	17.4121
AFF2|2334	5.83174	0.656158	1.03072	0.594721	0.344795	1.11437	0.682698	0.617449	0.866789	0.465836	0.315249	0.334164	2.97691	0.13563	0.476906	0.293109	0.515543	0.270455	4.17654	0.0806452	0.26129	0.176906	0.139296	0.158871	0.318915	0.33805	0.322507	0.106158	0.140762	0.544062	0.533065	0.934751	0.124633	0.227273	1.89751	0.743695	0.0146628	0.0835777	0.297581	0.0739736	0.21261	0.539223	0.619868	0.633578	0.424413	0.182551	0.56085	0.126393	0.546188
AFM|173	0	0	0.0500751	0	0	0	0.0500751	0	0.10015	0	0	0	0	0	0	0	0	0.0110165	0.00500751	0	0	0	0.0250376	0	0	0	0	0	0	0.0500751	0	0	0	0.10015	0	0	0.00600901	0	0	0	0	0.0500751	0	0	0.0425638	0	0	1.59089	0
AFP|174	0.0573394	17.1732	0.579128	0.458716	0.0286697	2.27122	5.90596	4.53899	11.2385	0.229358	0.0573394	0.172018	1.11812	0	0.860092	0.0860092	0.430046	0.0636468	0	0	4.38647	6.22133	0.974771	0.630734	0.114679	0	2.32225	2.35092	1.08945	18.6927	0.0573394	1.14679	0.946101	38.7792	1.06078	0.946101	0.0573394	0.172018	0.114679	0	0.372706	21.3016	0.172018	0.774083	7.11009	0.573394	1.17546	435.323	0.286697
AGAP11|119385	4.56278	4.07399	6.79238	2.93722	4.27085	5.56323	1.60135	3.27354	9.54978	5.1426	1.61211	3.08834	2.3148	4.09238	8.80359	5.13543	3.72152	7.57982	2.0852	2.99058	6.04843	1.29058	10.174	19.5767	4.52063	3.79821	6.00897	9.67265	1.49821	4.91031	11.5987	3.37309	8.49507	2.80179	5.1861	3.4426	0.583857	6.07085	3.34529	8.78969	2.04036	2.58072	8.72646	6.20807	5.31435	5.00583	11.2323	8.44305	16.6309
AGMAT|79814	2.8643	2.96038	6.15346	3.91485	3.41348	1.75319	6.44809	3.13024	3.72131	2.83561	18.2814	12.2409	16.0974	1.44718	4.42577	3.22769	8.96676	2.37705	6.88251	11.0369	2.86293	6.00911	4.7163	8.15164	5.7837	12.8716	1.54736	7.77004	3.37432	3.801	11.2609	7.19536	4.12933	4.24909	6.22177	2.35337	10.2136	1.62978	5.48862	10.4768	2.57787	4.1735	4.64344	1.78415	7.96585	5.9622	1.58561	1.8725	4.66439
AGPAT2|10555	40.7166	132.452	134.793	81.2055	99.7376	134.461	108.351	189.266	157.876	124.325	128.638	27.0903	152.438	72.8082	65.3796	200.791	63.5857	54.8992	191.224	222.713	113.096	333.334	106.118	209.659	71.339	96.9627	126.677	257.622	279.522	84.9051	146.049	153.026	341.995	153.474	158.386	199.849	189.374	185.238	35.0438	141.208	216.731	129.759	430.27	80.4653	133.376	60.731	70.5465	147.484	69.25
AGPAT9|84803	1.86454	9.11149	8.59551	4.16476	2.92998	4.73744	2.4726	25.7021	0.722983	6.86834	4.96575	4.52816	89.2256	5.02283	2.16895	3.39916	11.6438	3.69216	22.5419	3.19635	3.93836	5.93607	13.8272	8.73516	8.18113	18.79	2.07382	7.58942	6.42694	36.4136	33.3143	10.1979	2.94901	2.98516	2.02055	9.76598	4.12861	2.20776	36.3721	1.48402	8.73288	3.84323	19.9658	6.8809	2.68265	7.02055	5.47945	165.724	9.51294
AGR2|10551	8.93697	2095.71	1240.19	3876.83	740.476	582.048	341.123	2597.88	3.01035	3066.1	12724.5	30.9539	37.3584	1867.81	885.529	0.658514	88.2098	8259.57	2.95955	0.658514	2996.49	5326.11	2299.2	348.983	2152	2.44591	183.538	1470.3	1507.68	3700.75	16388.5	1534.23	1866.41	876.565	1645.46	1216.83	26.952	1293.91	16.3189	283.851	5652	1634.16	5857.25	6886.82	418.148	6700.87	3481.27	4172.08	4682.43
AGR3|155465	1.31062	2053.36	777.966	1698.62	330.336	355.893	167.024	82.4522	0.131062	1120.24	844.122	0.262123	2.35911	574.147	670.595	0	9.45347	1394.57	1.44168	0	1303.28	3.27654	988.959	37.8139	27.4024	0.393185	312.708	4795.61	1851.7	1075.08	418.298	2271.25	256.415	42.8021	7.63696	182.45	0.131062	5.44823	4.89515	933.115	769.621	700.388	665.953	1154.05	3.70642	1146.37	444.564	1211.42	1544.94
AGTR1|185	0.813356	61.3964	16.524	3.42466	2.52911	16.1815	7.40582	20.4409	0.385274	6.31421	6.4893	1.00599	9.79623	4.25942	5.2226	0.407962	2.90668	14.6742	0.513699	0.47089	441.282	4.55908	1.09161	6.85317	3.85274	1.96918	7.98159	1263.86	325.905	3.33904	5.99443	4.81592	1.66952	2.39726	0.0856164	19.4602	0.342466	41.3955	2.63271	1.11301	19.494	19.2637	10.0813	13.9555	3.40753	273.07	15.4324	20.3532	3.76712
AHCY|191	351.054	315.966	654.805	648.701	252.022	697.41	273.251	546.038	712.586	469.622	392.926	1243.47	1308.05	281.07	264.784	239.871	746.343	290.201	654.951	2315.33	613.72	524.19	740.464	633.339	402.134	572.962	365.156	434.838	481.124	878.727	580.48	525.293	473.005	485.109	844.948	435.183	1144.42	849.884	1070.29	557.076	434.107	522.488	384.758	529.869	972.451	469.892	253.526	800.286	591.001
AHNAK|79026	676.925	928.701	1273.97	508.868	969.621	2122.14	847.092	1618.81	121.859	701.491	614.947	66.3637	619.193	712.389	684.799	100.924	294.27	896.912	218.754	69.1956	830.106	430.532	569.685	744.274	863.236	381.573	474.496	474.008	587.054	1944.53	1547.93	513.007	400.964	390.047	147.976	826.473	73.27	371.027	341.458	509.116	1124.23	1186.41	1398.9	1952.54	323.859	2071.3	1729.93	1276.34	1045.05
AIF1L|83543	146.702	38.2114	72.7592	39.3805	39.6679	17.0605	44.7369	73.1914	412.078	16.1433	44.7117	636.862	261.794	14.313	17.1204	132.15	92.532	7.19701	971.15	93.441	17.1938	35.2534	50.2995	519.326	38.3699	38.4037	20.7851	13.0546	3.96242	68.7537	55.815	23.5053	556.117	217.763	59.1738	84.6635	232.49	117.925	388.976	7.75103	318.636	45.6938	37.5925	40.3561	172.797	33.7892	54.9448	15.458	20.9336
AIFM2|84883	8.49483	20.4266	19.0048	23.8508	13.3391	31.0448	17.5221	58.3384	48.2471	44.6278	17.613	12.3653	33.9552	14.6837	15.705	16.6048	74.1492	39.634	36.8797	48.264	40.0872	12.9928	68.8635	62.07	36.9907	65.1316	20.8977	48.4686	28.7305	16.152	42.2267	16.6764	37.1713	14.9469	45.8866	30.1651	18.6613	56.7436	47.7781	5.35837	42.01	39.8353	56.9545	28.8632	91.662	48.0114	16.9786	46.295	46.2302
AIFM3|150209	1.19796	0.941376	9.19116	3.62787	1.04206	3.15038	4.72345	16.5973	3.37723	7.46644	0.722175	3.75106	0.608326	3.79439	0.914613	4.21028	1.77485	1.31266	1.24044	2.94732	2.47026	1.64231	2.75404	10.4885	3.99703	0.951572	0.892099	2.03526	5.35047	1.82668	4.72897	2.54885	5.75404	1.23195	1.99235	2.72727	2.07944	1.73492	1.37766	1.48683	2.33645	5.93288	3.52506	2.72515	1.96262	3.40994	1.06202	6.37511	1.40187
AIM1L|55057	0.479529	0.775434	2.99069	3.21092	0.818238	2.97643	7.85732	0.955335	19.6749	42.8337	10.6222	6.15881	31.8524	0.457816	0.806452	3.71712	5.73139	3.01489	6.97457	11.0583	0.8933	21.16	5.0639	6.49318	1.54467	10.9299	4.92866	15.6092	5.22891	3.07072	6.16687	1.48883	2.27295	2.73883	26.4467	1.58127	1.88958	2.68921	1.41501	8.54032	0.408809	10.7562	1.24069	0.511166	2.6464	0.702854	2.06886	1.7103	2.7928
AIM2|9447	0.0673401	2.12121	0.820202	3.40404	5.76162	1.00539	4.46397	1.84646	2.07879	1.44781	2.52525	1.17845	3.79259	0.527273	3.26599	14.1145	40.802	0.841751	12.67	0.813468	1.0101	0.47138	16.3657	10.5515	29.4633	15.7771	1.2734	1.0101	0.59798	1.2202	1.23636	2.05926	4.96566	1.97778	0.40404	2.20471	3.29966	0.673401	10.6101	3.25522	0.26936	1.61414	11.3832	3.7468	18.501	1.30572	1.19259	4.48148	0.572391
AK5|26289	1.54099	14.6589	64.187	8.85109	1.99417	43.0884	12.7053	5.69543	137.795	44.8661	7.50476	1.17317	4.34387	1.08658	7.09242	1.24931	9.97452	3.24255	1.62911	2.53086	3.23918	2.17992	1.10715	4.5459	1.94965	1.41326	26.7713	13.7335	26.9681	3.54621	2.607	88.7289	0.744857	1.87197	1.38164	28.8809	4.66687	6.02487	8.33589	5.75192	1.74547	98.809	13.1041	28.1127	1.81148	6.57967	47.0433	0.7642	2.19527
AKAP12|9590	7.45816	34.0393	29.2507	17.3524	19.2364	77.6342	26.9806	60.8198	22.4496	16.9961	22.8105	5.28499	24.2776	11.0935	18.8637	12.68	12.0324	13.3054	5.62915	5.14189	15.4167	20.3789	6.52049	15.0046	25.7656	11.2866	17.702	6.51904	4.44919	14.8934	33.0169	31.901	5.39122	20.9069	4.01407	42.6909	2.2446	6.86915	10.4978	11.0337	9.60999	23.8598	58.3567	57.5948	8.21125	22.8627	48.2173	10.2228	18.4514
AKAP2|11217	54.2769	33.7164	29.0402	14.8842	15.6949	32.106	15.6267	34.7253	12.9027	24.2614	22.0434	10.0641	33.8526	18.1525	10.7426	20.6784	32.1135	11.4585	75.3833	10.8061	24.8388	10.8842	19.5766	28.2415	38.9331	25.5546	14.752	30.2345	7.57355	14.4043	27.1558	23.7174	9.24847	14.9425	6.14885	33.5042	58.35	9.11171	78.5677	10.6739	20.4107	18.7477	64.2623	34.5495	32.2999	22.5167	29.6848	116.496	17.992
AKAP5|9495	5.89379	7.59226	10.2295	2.66456	2.88485	7.29459	19.9961	4.04887	11.6444	14.3226	4.9815	10.4711	5.20456	4.11346	4.02066	3.70032	12.1842	9.87113	8.31047	2.81517	11.3188	2.19763	26.6895	7.92924	7.83629	4.35795	3.09357	7.65346	27.4565	4.08509	8.37059	3.97626	9.03962	7.54524	3.47156	3.99044	2.48867	3.0481	6.31817	4.69693	8.88947	16.7076	7.43148	23.941	7.30507	9.89055	5.28457	25.3416	4.91383
AKAP6|9472	5.85909	2.07116	3.42211	1.66163	0.933672	2.41703	1.19504	1.71233	1.9568	0.882465	1.28679	17.0254	1.49263	0.877637	1.43558	2.16518	2.48323	0.539898	1.65121	0.717916	0.988564	1.84752	1.2676	2.20559	0.984498	1.41766	1.60051	0.304956	0.23507	3.05693	3.27179	1.30877	0.61906	0.633418	0.529606	4.13837	2.12834	0.152478	2.48183	1.19301	0.908386	0.730623	2.67662	2.26328	0.380432	2.27916	4.30457	1.82973	0.959339
AKR1C1|1645	12.7355	17.4133	5.18497	9.86272	3.86561	3.97399	2.53902	68.4928	2.5802	8.19581	1.33671	57.3938	18.6214	2.24566	4.08237	72.9025	5.75145	6.76879	3.68497	51.5636	27.7919	2.18858	2.12139	30.0578	14.0173	4.76879	13.078	5.01879	0.541908	577.918	34.8605	3.35983	1.51734	1.40896	50.5462	49.1496	1.32009	1.78324	290.633	1.55347	18.6416	7.65896	115.824	20.6647	3.64884	10.5773	38.7074	11.3996	765.355
AKR1C2|1646	11.1197	26.1776	4.86486	12.3969	6.139	6.17761	3.05019	118.567	2.12355	6.67336	1.46718	29.8069	14.451	3.55212	4.57992	89.0486	5.3668	8.39923	4.13127	121.581	36.0232	2.77992	2.32819	47.7992	12.1236	4.51737	15.0958	5.98456	1.89189	368.529	40	5.01931	2.04633	3.16602	59.9066	56.5459	0.501931	1.19691	224.554	2.20077	36.2162	11.1683	159.691	31.739	3.74517	16.2548	55.4054	14.7421	450.481
AKR1C3|8644	21.7301	80.7189	49.1566	83.9759	15.3647	42.2281	18.7952	244.763	4.13896	51.9237	12.1285	26.6546	18.6747	8.30924	17.588	83.6594	59.5181	40.0803	9.23695	135.04	49.3325	31.2048	24.8112	49.155	28.6297	17.5502	48.5502	15.7622	42.6867	330.189	47.0281	51.3205	8.23293	27.4233	19.3574	186.659	0.803213	6.1759	190.976	13.5245	203.651	36.2249	144.801	94.0161	15.4233	49.4739	161.078	12.2851	342.38
AKR7A3|22977	2.45965	21.3274	264.892	171.069	475.742	2.03689	5.60569	115.497	9.0907	39.1929	88.3367	4.23136	7.03536	177.36	205.55	5.53113	3.63105	58.2298	2.37433	9.53958	485.337	9.17756	503.572	244.492	4.50192	6.25749	119.377	139.706	20.814	22.3305	144.304	70.6833	32.8847	47.744	72.9746	489.706	2.79093	548.996	2.7402	118.981	72.9608	220.353	13.3274	357.782	1.0761	374.539	43.4935	123.98	267.221
AKR7L|246181	0.716204	1.81289	12.6638	8.56893	21.6468	0.358102	1.11773	7.47269	6.37869	3.44584	4.86258	0.872874	1.57475	10.1817	13.9364	1.41003	0.962399	5.04655	1.72829	4.40913	30.3102	0.984781	28.4503	24.6679	2.43957	1.38765	7.69561	23.7341	1.65577	1.11459	13.0237	5.63787	2.57117	2.48747	8.00761	29.9749	1.11907	34.6034	3.15891	11.5327	8.26544	13.1893	1.48075	20.4664	0.568487	19.9364	3.33259	10.303	16.3286
ALAS2|212	0.122549	0.00539216	0.392157	0	0	0.0490196	0	1.47108	0	0.0490196	0	0.147059	0.0490196	0.422549	0.0980392	0	0	0.0980392	0.269608	0.0490196	0.0779412	0	0.111275	0.0308824	0.0490196	0.00686275	0.147059	0.318627	0	0	0.127941	0.0490196	0.196078	0	0	0.0490196	0.0490196	0.106373	0.0245098	0.0245098	0.196078	0.196078	0.0245098	0.0490196	0	0.377941	0.0735294	0.220588	0.0794118
ALB|213	1.18679	53.8184	1.60526	0.515996	1.28999	17.8535	43.1878	159.435	115.374	1.16718	0.644995	6.60475	3.65325	0	1.44479	2.94582	90.0175	0.515996	0.386997	0.851393	18.3695	1.93498	0.419505	4.33901	0.214138	0.470588	65.6249	7.92776	3.04438	27.6434	0.644995	6.44737	0.773994	5096.49	3.68937	13.4721	0.154799	5.73065	0.701238	0.567595	1.10939	7.14964	0.670795	1.45511	32.6238	4.44066	5.88235	506.823	2.27038
ALDH18A1|5832	112.633	190.787	312.063	163.015	139.519	330.024	196.187	138.462	324.849	338.237	136.434	878.016	226.74	129.843	136.422	405.397	269.391	98.5152	204.044	313.701	213.974	1172.38	251.653	222.181	81.5918	188.33	137.535	269.838	175.503	154.131	112.37	209.835	264.024	321.625	117.266	298.629	204.623	216.515	312.153	218.684	88.2309	245.848	336.311	253.333	272.589	292	150.302	316.803	194.239
ALDH1A1|216	185.227	47.9673	60.2583	71.3426	21.7476	150.098	72.3124	71.0965	53.7076	47.442	48.8962	29.7734	54.7734	24.2812	71.3114	28.5575	59.595	11.4035	31.9932	28.7768	14.6905	53.4016	67.3173	47.8285	28.5283	30.4557	54.366	15.3509	21.0283	93.75	45.8221	89.9459	23.2456	36.864	387.738	61.9323	8.71832	5.79922	12.5731	18.1287	14.4006	34.0668	92.1223	92.0175	84.0648	26.8231	76.9362	12.1301	92.3606
ALDH1A2|8854	0.879588	4.89839	5.65453	4.86655	1.38004	2.80558	4.46194	7.36882	0.197149	1.08159	2.63876	1.39521	2.54807	0.940249	0.640886	1.00091	1.65575	4.20079	0.970579	0.531089	1.80467	3.22869	0.501668	3.87322	8.68517	2.79497	4.33606	1.8805	0.576281	0.986655	2.80922	4.4131	0.652108	2.66758	0.272975	9.94874	0.455869	1.1374	0.879588	0.605096	7.0367	1.2475	11.3694	18.1474	0.366697	4.17349	5.8993	0.655748	1.76342
ALDH1A3|220	227.791	21.9719	36.43	15.5148	34.8632	70.471	24.2525	27.3033	19.8468	122.517	30.0977	45.6724	18.5511	8.0662	20.1296	60.6715	47.8559	4.8925	57.4111	32.1422	31.3045	57.0432	36.2938	16.2516	17.0665	64.9023	48.204	8.44451	11.0126	3.37264	23.9067	57.1668	2.91614	13.4256	0.866961	55.8112	21.663	42.3537	146.145	33.6066	5.95839	24.7784	58.0214	50.1324	18.7787	12.925	48.9562	6.00567	17.4697
ALDH1L1|10840	6.31999	5.1679	6.34791	4.51346	1.43843	2.45155	1.52423	13.8297	4.69448	2.00269	1.31662	2.75707	2.81258	1.39468	1.7611	10.5548	3.06292	2.24495	3.64468	1.81528	6.12147	2.39502	3.79812	13.6548	4.74933	2.35801	3.42295	5.2214	2.2924	1.4031	10.0242	2.85834	1.74764	1.0397	3.75908	15.2137	1.37921	5.28836	3.50908	2.22645	5.61844	3.26884	24.0915	7.17968	3.05148	2.73486	6.19381	4.28937	2.82503
ALDH2|217	9.59016	139.622	146.949	131.51	381.668	488.335	195.708	188.441	609.664	177.507	105.304	139.273	378.68	37.3646	384.77	137.496	625.163	18.1617	361.283	60.7771	192.195	50.65	369.81	784.354	195.021	92.8928	178.392	217.93	487.34	49.3367	275.893	207.464	341.03	356.98	111.335	367.375	121.909	67.864	104.892	163.374	185.274	288.051	675.918	434.654	159.496	100.351	194.197	63.0549	776.121
ALDH3A1|218	2.02033	2.06956	3.65918	1.7068	1.68004	1.64901	0.920813	3.15516	24.1589	2.41466	1.14874	3.93365	5.68272	1.6779	1.37132	1.76458	3.39433	2.58641	3.88122	11.672	2.73408	1.72766	3.58962	4.14018	1.4061	1.87266	2.93579	3.45532	2.17549	226.098	2.59604	2.72124	2.07919	1.34243	19.68	3.20439	1.8946	1.57517	2.73087	1.54361	1.63777	3.26538	3.28197	2.84858	2.33708	3.47994	5.47994	1.77849	282.751
ALDH3B2|222	35.002	247.297	54.4728	75.5655	20.647	39.4908	228.953	23.9417	67.5499	158.391	275.656	142.052	39.6965	66.4677	64.2919	64.246	45.6649	216.88	22.2464	201.858	174.764	289.886	38.8391	117.479	196.067	15.9645	53.9117	55.8135	217.25	749.93	467.836	63.2348	671.775	263.738	170.357	15.0539	35.0619	101.026	23.764	8.6262	506.793	100.599	482.784	171.1	4.96326	242.59	187.194	48.9481	208.438
ALDOA|226	936.66	2230.96	4595.05	2781.93	9875.47	2957.99	3914.87	6471.09	2050.73	3450.16	3227.01	2491.74	3386.42	2160.43	6724.72	5113.87	2606.97	2704.87	4722.31	1429.35	3591.09	4860.47	5495.82	8274.61	1087.27	2566.85	6253.67	5685.33	5127.67	4313.37	5763.84	2630.24	5504.49	4880	7958.04	2750.1	2554.52	3699.16	3789.07	3796.24	3530.09	4495.46	8767.43	4477	2966.24	4325.26	2332.7	5950.67	6719.2
ALDOB|229	0.288541	0.309151	0.505359	0.206101	0.226711	0.37263	0.135202	0.71352	0.319456	0.741962	0.206101	0.10305	0.12366	0.0412201	0.0206101	0.12366	0.113768	0.247321	0.112531	0.731245	0.476917	0.132317	0.12366	0.282358	0.0469909	0.178895	0.288541	0.185491	0.0412201	0	0.190437	0.196208	0.288541	0.0412201	0.206101	0.350371	0	0.295548	0.314509	0.0412201	0.741962	0.244847	0.343776	0.309151	0.16488	0.16488	0.474031	0.556472	0.16488
ALDOC|230	27.4752	25.7735	33.552	17.9839	7.99938	27.5248	14.2191	69.0377	42.0792	160.652	6.31188	241.343	21.8453	143.406	9.28218	55.4505	31.3311	8.09839	78.138	41.12	69.3942	10.7488	9.03837	22.3806	19.3069	24.4715	31.2407	5.04332	33.4158	11.7884	327.041	17.8806	54.9418	8.94183	746.192	57.8274	86.0928	5.56931	26.0613	2.93936	20.6058	67.2915	29.6411	36.0681	45.3954	132.652	42.1399	7.48205	123.722
ALG1L|200810	6.35507	29.6461	1.59783	20.564	1.3285	0.845411	2.32367	4.01208	6.35628	1.91425	14.128	4.65217	6.41304	7.44082	1.63043	1.80072	2.44203	2.82367	6.16304	1.38889	5.67633	45.6824	1.55556	10.8152	4.14493	3.74155	0.939614	4.08816	2.98188	75.4263	44.4372	11.9952	37.5302	8.75483	72.4662	3.38043	6.58816	0.966184	2.23188	3.62319	1.81159	2.13527	3.92029	4.33213	9.64372	5.36836	1.62923	4.70773	9.03865
ALG1|56052	25.3571	39.0127	86.5342	39.2119	81.2205	66.0046	38.2413	71.593	24.3059	72.7478	44.0023	101.737	63.9072	39.0621	67.7124	42.886	50.812	68.2157	41.5859	32.1151	72.0928	85.1901	81.0411	83.6706	32.8966	58.596	54.059	110.16	73.2648	112.849	96.2816	50.5056	56.8117	61.147	42.0228	57.5005	30.2372	63.9823	44.4105	101.081	90.0867	99.7491	64.1546	94.6485	52.775	85.4615	33.5722	98.4894	118.346
ALG3|10195	59.2275	95.1947	151.793	79.9296	85.5601	273.02	101.339	142.738	144.072	178.056	132.596	389.997	371.098	60.502	89.3388	378.88	232.898	116.318	271.187	411.669	118.497	264.171	299.346	320.161	79.4788	263.97	104.845	196.816	209.617	165.671	171.115	133.264	237.095	161.413	159.312	181.303	357.03	284.139	325.531	93.373	201.8	124.721	188.507	140.596	154.467	117.83	58.5109	166.259	134.191
ALK|238	0.330033	0.117869	0.294672	0.0707214	0.0167374	0.248232	0.0707214	0.106082	7.26898	0.200377	0.388967	0.133192	0.848656	0.0471476	0.0471476	0.310467	0.025224	0.0235738	44.2951	0.0942951	0.0959453	0.0942951	0.306459	0.16926	0.141443	2.02782	0.247525	0.00282885	0	0.0942951	0.18859	0.306459	0.0707214	0.235738	0.15323	0.229137	0.200377	0.0825083	0.165017	0.0235738	0.0266384	0.029703	0.18859	0.459689	0.0471476	0.122112	0.282885	0.0471476	0.0942951
ALPI|248	0	0	0	0	0	0	0.00585938	0	0	0	0.00507813	0	0.000390625	0.000390625	0	0.00351563	0.00351563	0.00859375	0	0	0.0390625	0.117188	0	0.00585938	0	0	0	0.0078125	0	0	0	0	0	0	0	0	0	0.003125	0	0	0	0.00429688	0.0214844	0.00976562	0.00429688	0.492969	0	0	0
ALPK3|57538	1.70098	5.29182	3.68431	2.37701	8.96556	6.15611	2.60751	4.2551	3.92525	7.46268	3.46388	1.53804	3.54524	2.12527	3.95896	6.46676	2.04332	2.28018	4.95416	1.58387	5.7533	4.49304	3.49688	7.79158	4.41913	4.50432	3.31617	3.03336	2.24382	2.00888	7.42273	3.44024	2.2749	2.95356	17.409	7.52832	1.46988	5.5018	4.83441	2.47864	1.93665	4.46772	15.9862	3.7041	1.60103	3.36885	2.87533	3.78834	4.48032
ALPL|249	30.4816	16.3602	39.6085	7.5372	14.6578	9.71026	9.75411	30.8673	375.527	30.9906	9.75215	76.4096	74.2424	5.64213	19.4009	19.9507	52.5677	4.29287	47.3939	144.778	44.251	115.053	31.7341	37.7009	32.4448	27.0372	21.1813	56.7933	12.4119	18.6359	16.4229	21.0936	14.305	21.946	32.6488	61.1476	174.493	10.0517	44.3673	6.02976	8.75098	23.8708	32.7134	31.1597	21.798	27.4906	92.0928	6.99295	16.7972
ALS2CL|259173	2.6777	8.58277	9.01558	2.66553	11.8537	8.60394	4.50243	9.94401	1.63096	16.14	8.15482	2.02045	3.28092	2.98272	7.48539	8.32619	15.7829	3.03335	6.36636	0.803311	2.93476	4.84421	11.7132	30.3892	9.76266	11.1417	9.49051	41.4387	6.14654	2.89776	5.77532	6.48734	5.4406	3.66358	8.51485	9.94742	3.67575	1.92186	3.63705	4.61295	2.81159	6.73759	8.7999	8.41553	3.61782	4.79187	6.17089	8.69231	3.75852
ALS2CR11|151254	2.0283	0.990566	0.928302	0.6	0.117925	0.833019	0.542453	0.570755	0.246226	0.791981	0.283019	0.424528	0.283019	0.495283	0.259434	0.707547	0.165094	1.3033	0.495283	0.400943	0.504245	0.364151	0.166038	1.93396	0.417925	0.306604	0.518868	1.03113	0.589623	0.117925	0.801887	0.151415	0.141509	0.0471698	0.212264	1.0717	0.0943396	0.661321	0.259434	0.683962	0.707547	0.64717	0.903774	0.495283	0.714151	0.566038	0.778302	0.371226	1.7217
ALX4|60529	2.04414	0.895334	2.88525	0.529004	0.252207	3.72005	1.30076	0.283733	0.842371	0.764817	0.409836	0	0.261034	0.315259	0.37831	0.0630517	2.7396	0.315259	0.513871	0.362547	0.0315259	2.20492	0.00945776	0.346784	1.03657	0.186003	0.807062	0.0630517	0.189155	0	0.283733	1.21627	0.126103	0	0.00882724	3.21564	9.39596	0.0895334	0.157629	0.0945776	0.535939	0.459647	0.741488	1.24275	0.00252207	0.369483	2.39596	0	0.0945776
AMH|268	2.3908	0.331719	2.30847	0.708475	0.0774818	0.697821	4.26586	0.62954	7.27022	0.290557	1.33317	3.89346	4.24213	0.154479	0.193705	0.263438	1.32446	0.655206	0.799031	0.387409	0.266828	2.42179	0.107506	2.84504	0.145278	4.94189	3.17579	7.97191	1.74286	0.760291	1.24988	0.675545	0	0.169492	0.130751	0.338983	0.137046	0.724455	0.238741	0.556901	1.70896	0.193705	8.63923	0.411622	5.2	0.25569	1.46344	4.76416	0.424697
AMIGO2|347902	7.04079	115.773	67.6459	31.2627	12.2356	191.588	57.411	48.3996	22.2673	68.2359	49.9657	9.5617	27.046	29.2245	42.8267	11.3016	27.9867	19.4596	8.75604	9.96233	27.9712	11.9771	99.8236	79.8239	14.1855	14.3079	56.1977	103.026	28.6828	22.774	36.4601	154.665	68.3481	31.2133	91.3539	128.424	9.81372	4.58794	37.1943	690.115	23.1697	28.3492	28.8335	108.894	21.7254	38.0652	105.702	62.2403	48.1411
AMIGO3|386724	5.4119	3.50499	9.74535	3.40293	5.76729	5.49535	8.87932	6.41057	8.34142	27.619	5.13763	14.5479	27.5731	7.92852	4.59973	10.4059	23.8846	4.91257	5.75565	3.91622	4.9109	36.6968	59.4166	13.502	4.9119	7.45445	6.09874	22.8338	19.5891	2.01031	10.6995	5.23471	3.71177	3.97108	23.994	6.27726	3.7131	36.8963	23.2929	8.04688	4.001	9.67354	9.69182	6.10638	10.0861	4.3617	4.22706	6.15658	6.32547
AMMECR1|9949	9.50359	11.3975	28.3097	18.55	32.4765	15.3451	18.5601	42.3916	23.3213	33.7967	31.9698	20.6039	67.2639	16.7647	21.6662	59.8319	14.1784	17.8963	23.6837	17.5925	7.61278	45.6978	16.5513	29.5045	19.0112	22.3716	7.9153	13.155	8.7993	13.8648	19.3519	34.5284	6.1856	7.87056	31.04	9.21782	8.84994	6.96004	29.1447	72.2688	24.5719	15.2475	16.1856	44.3618	19.6408	11.431	19.2513	16.7076	23.3751
AMOTL1|154810	87.1192	30.7146	52.5296	15.3505	17.4851	68.7137	17.1487	25.9164	171.58	27.1175	23.9545	178.586	35.3436	8.86318	15.2706	18.7303	17.2651	14.7069	94.7582	8.81835	14.0477	24.8234	5.26457	17.1618	24.5826	11.3148	21.9871	7.61934	6.75146	20.3944	17.9469	24.6729	5.44599	15.6925	3.01995	49.8283	2.57172	28.2095	30.5765	9.69857	8.82766	23.5006	82.6199	58.6065	23.8855	18.8788	49.6731	6.15901	15.7374
AMOTL2|51421	151.736	86.8961	89.0139	41.6961	109.751	140.06	71.2587	97.5783	119.73	82.5176	30.2603	54.1996	109.76	15.1859	76.5628	31.0714	53.5294	44.7327	23.1065	27.4139	82.0828	46.0098	66.2209	97.6398	40.647	86.163	74.6406	51.6396	43.5172	65.8078	97.2971	102.972	20.8925	18.2392	22.4028	123.991	102.359	29.8002	54.0195	55.5837	37.5777	63.8587	123.154	91.5288	19.3401	137.292	95.9373	68.4876	77.0545
AMPD1|270	0.0856531	0.599572	2.88394	2.05567	0.0856531	0.877944	1.30621	1.14561	0.214133	0.0856531	0.0428266	0.513919	1.24197	0.599572	0.620985	0.471092	1.15632	0.149893	0.687794	0.535332	0	0.513919	0.963597	1.24197	1.30621	0.606424	0.823126	0	0	0.0428266	0.0929336	1.99143	0.0856531	0.321199	0.192719	3.92934	0.0428266	0.173876	0.449679	0.0856531	0	0.214133	0.12848	1.606	2.06852	0.43212	0.792291	0.0518201	0.0428266
AMT|275	9.30711	4.61929	7.69188	2.87868	4.01269	5.10152	4.32284	2.79188	4.25279	5.81218	1.47208	2.96954	4.69594	1.5736	21.0914	13.5711	10.398	4.56599	9.12487	2.03046	10.7183	1.5736	9.25431	23.2878	5.15228	5.99594	11.0086	23.5934	9.54315	1.45228	8.07665	7.99492	1.39594	1.67513	8.44518	6.96091	0.793909	3.68477	5.40457	6.12944	4.74569	2.76599	8.65482	6.45888	4.12995	7.06396	13.8325	40.2772	5.35533
AMY1A|276	3.34254	1.32597	1.1663	0.497238	1.04972	0.690608	0.497238	1.40884	0.89337	2.50718	0.469613	0.441989	29.1779	1.24309	1.96133	25.8387	22.8994	0.718232	24.1094	0.138122	1.33867	0.276243	2.40331	6.04972	1.0221	4.53039	1.90608	1.79558	0.469613	0.58011	2.34807	2.1547	0.441989	2.12707	1.46409	2.48785	0.481215	10.442	11.1967	3.48066	0.635359	0.552486	2.65193	1.0558	2.49171	0.414365	2.48619	1.07735	3.12376
AMY2A|279	1.68971	2.18894	0.883257	0.345622	0.537634	0.691244	0.230415	0.960061	0.384025	3.1874	0.230415	0.345622	2.33487	6.52842	1.22888	2.80952	1.15207	0.192012	3.03379	0.230415	1.34409	0.115207	1.45929	4.30108	0.384025	0.806452	1.95853	1.5361	0.15361	0.384025	2.30415	1.15207	0.0768049	0.806452	1.11367	0.806452	0.115207	2.61137	0.30722	15.4724	0.691244	0.192012	1.99693	0.15361	0.15361	0.230415	2.07373	0.499232	2.53456
AMY2B|280	13.1702	10.581	8.37381	4.0149	5.70655	5.91332	3.60858	6.97291	8.68894	25.5038	3.42889	7.24515	9.45237	4.31151	14.6758	29.8935	12.4321	5.28217	27.1156	5.08984	14.3553	3.18284	19.1327	57.2239	9.74582	10.7377	14.0208	20.4795	3.20271	7.45959	22.8605	7.70926	6.7544	4.8298	8.32325	11.3074	4.38646	20.5585	7.47946	23.0135	7.06546	5.23251	20.7273	7.8158	8.79684	5.16795	14.4903	11.6456	21.6104
AMZ1|155185	0.384799	1.29855	10.2559	2.335	9.38766	0.405051	0.786276	6.62378	0.70884	2.84727	0.658089	0.358589	0.574458	0.929235	5.39552	0.539671	1.07553	5.30832	0.314034	0.250179	1.9564	0.313081	0.847034	15.5423	2.37574	0.493924	5.82464	0.57422	1.83846	0.481058	58.9435	0.512271	8.92304	0.845842	12.8528	2.2447	0.119133	0.783893	0.750536	1.03645	0.393138	2.85085	2.58518	3.56302	0.512271	4.15178	3.25185	0.571837	4.14725
ANAPC11|51529	86.3712	182.64	380.196	217.821	211.457	438.887	187.045	362.117	277.904	572.072	133.111	468.138	408.485	183.645	156.845	1088.56	529.007	722.567	458.725	518.876	493.305	301.152	485.008	787.423	135.546	345.745	295.003	729.918	347.974	609.008	556.304	134.294	278.057	279.226	619.683	230.362	232.776	429.632	483.817	163.454	328.923	384.421	367.028	450.857	716.593	219.175	109.171	312.8	467.159
ANGPT1|284	3.07029	6.4745	4.96067	2.24435	1.70084	6.78762	3.33748	11.6087	8.43694	5.4268	2.15681	1.68739	19.4907	1.99188	2.61355	3.67927	6.07714	1.62751	22.2545	1.28825	2.66582	2.39787	4.02131	7.25044	4.17711	3.35016	1.95331	1.94646	1.70236	2.87998	6.55849	3.95839	2.33443	8.91906	1.95382	4.47856	3.07815	2.41284	3.79295	1.52246	3.5524	4.86526	10.0279	4.53387	3.08297	2.53743	13.2895	2.86501	3.46435
ANGPT4|51378	0	0.347222	0.641026	1.38889	0.0534188	0.354701	0.240385	3.81944	0.186966	0.213675	0.293803	0.106838	0.240385	0.106838	0.267094	0.0534188	0.106838	0.0598291	0	0.106838	0.246261	0.0534188	0.090812	0.534188	0.240385	0.379808	0.667735	0.0625	0	0.320513	0.400641	0.213675	0.0267094	0.186966	0.106838	0.114316	0	0.165064	0.0534188	0.0534188	0.213675	0.139423	0.320513	0.778312	0.112714	0.318376	1.12179	0	0.534188
ANGPTL1|9068	1.44105	4.01747	5.62067	4.40786	1.96681	3.42067	11.2378	11.2629	0.655022	4.43959	1.5575	2.31645	2.34352	3.30277	1.73217	3.30277	2.2853	1.24891	1.23726	0.873362	4.5936	1.14993	2.98777	3.59738	4.74236	5.62271	8.27889	0.465793	0.189229	1.25182	8.51383	12.2125	1.38282	3.40611	0.396507	3.93071	0.0873362	0.160116	3.01426	1.4556	1.12082	1.70306	9.41514	6.68122	0.850655	2.17234	14.5822	1.95051	1.42649
ANGPTL2|23452	124.331	82.4575	194.119	40.3555	51.8815	402.072	199.391	86.4208	48.0867	237.427	104.155	34.6062	62.6712	24.4906	78.3746	66.5342	87.6722	57.9121	56.7687	40.9908	222.798	146.82	94.4728	94.8034	116.588	80.3571	144.147	40.9261	201.986	45.1319	67.4291	92.4619	32.5954	79.965	45.0261	257.998	10.4017	74.5798	122.941	31.8799	51.7334	106.356	234.653	225.348	59.1277	33.3418	118.185	35.9191	61.5757
ANGPTL4|51129	3.96654	29.5467	13.1678	5.53157	16.9271	3.48084	9.69455	85.9115	35.075	7.31247	17.4852	29.1419	17.6622	4.42526	3.88559	36.5326	6.9061	13.952	19.313	17.3502	28.3961	22.2321	7.47976	53.9406	33.7518	8.77388	38.4976	9.85537	3.34593	49.558	30.8575	9.98381	3.80464	25.0135	61.2369	72.2693	82.3108	18.7507	29.3794	12.4123	31.1387	10.156	115.646	32.9822	7.65192	8.36427	42.0367	49.8381	15.3535
ANGPTL5|253935	1.06798	0.335711	0.0377675	0.0419639	0	0.0839278	0.417541	0.0629459	0	0	0.0419639	0.020982	0	0.167856	0	0.392363	0.0419639	0	3.00042	0	0	0.0629459	0.0419639	0.103651	0.146874	0	0.0839278	0.121695	0.0419639	0.0839278	0.870751	0.734368	0	0.10491	0	0.167856	0	0	0	0.0419639	0.377675	0	0.353336	0.188838	0	0.251783	0.335711	1.02812	0.234159
ANGPTL7|10218	18.5951	0.554324	1.10377	0.753437	0.354767	0.0940133	0.175166	0.310421	0	0	0.133038	0.155211	0.947228	0.0443459	0	1.13481	0.465632	0.0886918	0.443459	0.0886918	0	0	0	0.59867	0.155211	0.203991	1.95122	0.0886918	0.0665188	0.221729	0.968514	1.01996	0	0	0	0.687361	0.000443459	0	0.0443459	0.0443459	0.0221729	0.133038	0.288248	5.98004	0.0221729	0.465632	9.32594	0.0886918	0
ANK2|287	1.27562	13.908	13.9715	8.53447	11.7111	17.2719	12.4613	17.1475	18.5123	7.64636	8.24769	23.2873	15.4229	5.40234	7.18991	7.38104	7.65893	3.78164	4.43481	4.25903	7.43481	4.50567	3.29639	9.22395	20.384	8.52575	8.72473	2.64688	2.41875	5.89457	14.6661	16.9017	2.38261	5.79595	6.44318	21.3079	1.17979	0.991796	5.65928	5.08082	5.12114	6.92826	39.8031	17.2765	9.98865	9.99127	37.9024	6.36848	9.28487
ANKK1|255239	3.63311	0.935902	1.75737	1.42037	0.394023	1.02792	1.14117	0.393236	3.39481	1.2792	0.535588	0.631931	0.89186	0.0983091	0.983877	0.68777	0.894613	0.874951	2.28588	0.602438	3.10578	0.451435	4.3138	3.30358	1.39127	0.314589	2.26465	2.4011	1.43531	1.04208	1.67204	1.03657	0.522611	0.960676	0.904444	1.20802	0.255604	3.87574	0.452222	2.46087	0.591034	1.41998	1.85018	2.69485	0.255604	0.471884	1.11168	3.94691	3.0468
ANKRD20A3|441425	3.01768	1.71717	1.54015	0.428788	1.07323	0.921717	0.988889	1.54394	8.42879	0.706061	0.580808	0.887879	0.82702	0.415404	1.70707	0.853283	0.256818	2.56465	1.50556	0.40404	1.5952	0.176768	0.655808	1.64318	0.743687	0.306061	0.465657	2.85859	0.807576	0.193434	2.95732	0.605556	0.391414	0.770202	0.192424	0.719697	0.0909091	0.72298	0.609596	0.898485	14.1904	0.518939	1.21187	1.61389	0.820707	0.388384	1.57778	4.31742	1.66995
ANKRD22|118932	4.02805	7.16804	8.61407	20.0178	1.50789	6.43827	8.78087	4.31355	2.96744	22.7428	3.45004	1.40195	9.3431	4.55773	11.1092	11.5665	39.0659	5.1132	25.3869	14.8951	6.90759	19.854	44.8037	7.36839	14.4293	20.2051	38.6895	46.9266	1.2269	6.93689	20.8718	3.46882	5.01177	14.9502	5.15753	5.4017	3.94591	27.6141	17.7481	5.08866	14.4222	2.2875	20.707	18.1074	26.8948	4.58102	13.6541	4.70223	32.6561
ANKRD29|147463	5.64516	8.72849	24.1075	5.28495	4.54749	4.52509	1.27823	14.8445	0.94086	6.89606	8.82616	1.25448	7.24238	28.4108	2.84498	5.48835	3.65143	17.2168	1.42921	2.19534	3.88127	1.07527	1.68011	7.39158	4.21729	1.16487	7.57168	1.23208	3.60663	4.00986	29.9444	6.69265	1.31048	1.5233	1.56317	8.27285	0.336022	0.358423	1.88172	0.806452	23.0712	3.49462	9.20699	8.26613	2.13441	19.6134	16.9592	7.30108	18.8687
ANKRD35|148741	7.62677	3.86355	10.8458	4.98226	2.25323	7.81581	3.12452	4.01	14.4481	4.48226	5.41097	0.392903	4.01355	0.725806	3.03258	2.30968	3.74677	1.75645	10.5361	0.806452	2.49516	3.73871	1.21065	1.93355	2.46419	0.76129	7.63	1.73645	1.32258	2.91935	6.06903	4.66871	2.35484	2.23452	6.71968	10.0606	1.5629	0.533871	45.8803	0.951613	2.03065	2.77032	3.66032	7.75806	1.88935	1.28806	12.15	1.18129	1.22581
ANKRD53|79998	2.28299	2.13949	1.35474	1.25891	0.963874	3.36177	0.856999	2.23281	4.81485	1.50527	0.852985	0.476668	1.27546	0.301054	0.850477	1.30457	1.17913	0.376317	1.96086	1.83141	1.36177	1.25439	0.908179	1.40191	1.25439	0.668339	1.58053	0.336678	1.35474	0.652283	1.7702	1.43001	0.526844	0.351229	0.442047	4.59207	2.63422	0.32865	3.9137	0.351229	0.326141	0.885098	4.64124	1.13297	0.64275	0.203713	1.91771	0.609132	0.57702
ANKRD58|347454	0.342253	1.08899	2.44244	0.995022	1.26136	2.48289	2.3323	3.79403	5.1425	1.57312	2.22464	2.8687	5.40137	1.29496	1.13192	1.31798	7.72806	0.933416	2.37212	1.57374	1.76042	1.64904	4.14935	5.07841	3.80398	3.08276	0.866833	3.39701	0.96453	0.795893	1.80896	0.928438	3.13192	1.44617	0.399502	1.63659	1.08899	1.78967	1.88301	0.454263	1.38208	1.48164	5.72122	1.60983	4.40697	1.87368	0.728065	1.55569	1.25887
ANLN|54443	17.8222	21.9126	44.3606	12.369	15.2921	16.0846	49.7476	68.9165	203.734	59.0593	59.4287	196.202	295.674	20.5135	18.3623	36.2826	69.8041	68.2614	98.4976	30.698	23.1884	42.5438	62.8254	47.5762	30.0784	91.6473	2.36254	32.2133	12.8211	46.948	71.323	11.3606	48.4096	40.0137	16.8385	7.60954	71.3091	10.7689	90.2741	5.17612	86.3101	21.0384	20.7463	14.3894	63.7337	81.0344	23.139	21.5258	38.3999
ANO2|57101	1.27122	1.6929	2.434	0.763052	2.81017	3.66908	0.28996	1.90843	215.291	4.51539	0.481928	1.11004	17.0145	0.455154	4.90736	0.547523	0.522088	2.28782	4.97912	0.535475	2.32637	0.562517	3.44498	2.88835	0.696118	1.21901	3.55448	1.39652	3.19438	0.508701	4.82892	0.788487	0.98929	2.14726	4.61847	1.06988	0.640696	1.59277	0.722892	1.39063	1.55074	1.0249	1.4423	7.62838	1.20375	4.16011	3.25408	4.14592	3.54565
ANO3|63982	0.193594	5.54382	0.776135	1.92714	0.0107357	0.246392	13.0512	0.729497	0.0703977	0.000351989	0.0175994	0.0351989	0.142555	0.0527983	0.0721577	0.105597	0.0175994	7.39176	0.369588	0.0175994	0.159099	0.0357269	0.00263992	0.44333	0.149595	4.03907	1.61387	0.0175994	0.0175994	0.193594	0.254312	0.0543823	0.158395	3.46709	3.0447	0.32735	0.0175994	0	0.0531503	0.0175994	0.281591	0.167195	0.651179	0.266279	0	0.600845	0.29919	0.0719817	0.202394
ANO4|121601	0.158019	0.355544	0.737424	0.526732	0.0265999	0.302871	0.131683	0.171188	2.97524	0.291546	0.105346	0.38188	0.439558	0.132473	0.0263366	0.105346	0.105346	0.131683	1.94891	2.99447	0.105346	1.22465	0.0945483	0.697919	0.474058	0.118778	0.197524	0.131683	0.0263366	0.171188	0.503555	0.579405	0.237029	0.0790097	0.131683	0.38188	0.184356	0.237819	0.131683	0.106136	0.210693	0.10561	0.276534	0.571504	0.118515	0.453253	0.961285	0.159336	0.263366
ANO5|203859	0.48048	3.5961	0.570571	0.0750751	0.225225	0.322823	0.114715	11.2312	5.80661	30.5922	4.01577	16.1431	1.8018	4.73724	0.481231	0.968468	0.369219	4.26426	1.0961	0.0825826	0.367868	0.015015	3.19069	0.225225	0.277778	0.0375375	0.225225	0.202703	0	16.1937	0.225225	0.255255	0.855856	0.112613	1.95946	1.15616	0.015015	0.0463964	0.211261	6.5015	0.03003	4.70856	6.9512	0.692192	1.04354	5.40676	3.55991	21.3506	0.317718
ANO6|196527	63.9323	73.8858	138.943	46.4997	66.532	179.837	92.6237	147.589	99.1009	92.2456	79.0735	139.858	78.153	58.5323	67.3792	28.944	56.4443	42.6663	55.3371	38.6649	67.5553	58.4197	41.1756	78.597	80.3594	66.232	45.2629	84.4743	93.0955	66.3366	102.341	86.6304	74.3055	75.4107	27.5781	89.8938	45.2374	73.4423	85.2549	83.0723	52.0616	137.781	145.763	149.931	77.5963	97.7651	111.452	88.5085	91.0328
ANO9|338440	2.15353	20.7346	21.4568	7.84092	12.1952	13.6019	8.58388	35.1584	36.586	18.685	11.636	1.00729	23.7395	17.2918	17.372	8.52727	14.6058	20.4453	14.3449	3.95971	32.5564	6.27197	13.6405	76.0069	12.2911	36.6342	10.5401	83.9232	13.4943	31.0327	31.4703	12.5898	22.2855	5.42376	9.4967	13.4411	7.58701	6.11115	5.74019	13.0875	60.1643	3.63008	10.5401	34.0313	23.7805	57.8652	4.9604	37.2497	21.968
ANPEP|290	83.4992	305.354	84.9564	429.919	11.907	80.2492	37.6019	340.297	22.6513	46.4152	40.4168	13.8457	101.218	8.49412	107.688	20.6853	59.2457	450.446	60.9575	9.27193	63.2917	17.5206	26.3152	75.0053	30.938	134.702	62.5893	13.4535	923.78	8.25856	1082.1	48.8075	6.96631	25.1671	6.68209	91.4016	134.832	18.4447	219.425	6.26711	15.9775	176.125	533.149	88.3414	37.131	101.435	105.842	10.0858	1557.82
ANTXR2|118429	44.15	78.7398	98.8788	49.9044	67.2291	186.797	94.1171	154.812	23.8925	184.247	69.3809	59.6859	75.551	25.759	69.4225	48.941	124.936	41.8921	104.37	22.9703	67.0764	91.2359	57.9104	70.6722	100.649	67.1436	69.4495	50.5501	53.5501	53.1248	48.1349	111.216	24.3114	84.1289	54.2867	135.989	9.12209	70.5112	66.7476	51.2748	34.0169	50.3983	133.798	165.029	86.2885	72.2629	121.204	36.1491	43.4925
ANTXRL|195977	0.385915	0	0.397183	0.0469484	0.268075	0	0.0450704	0	0.0469484	0.0938967	0	0.185915	0	0.0375587	0.0333333	0.574178	0.230986	0.106103	0.176995	1.56948	0.0056338	0	0.230047	0.523474	0.224883	0.212676	0.287793	0.00422535	0.0234742	0	0	0.117371	0.0619718	0.210329	0.0469484	0.303286	0.165728	0	1.07371	0.231455	0.0469484	0.00751174	0.117371	0.497183	0.0352113	0.139437	0.0821596	0.043662	0.117371
ANXA1|301	638.669	419.209	506.071	236.153	192.178	845.094	407.636	481.653	6639.33	643.192	275.348	456.367	2563.37	108.364	288.36	855.979	533.262	179.994	565.48	297.284	438.124	612.294	962.132	498.738	318.836	715.292	413.639	315.819	274.342	371.576	237.766	843.803	112.491	273.548	76.7327	669.565	1465.23	86.8234	1054.06	106.14	208.152	352.41	1108.16	671.535	280.876	249.338	1009.97	144.147	539.094
ANXA3|306	122.428	97.7968	110.28	35.8115	7.36536	225.379	60.9412	170.456	10.3635	142.453	8.84333	16.9706	376.827	25.1934	57.8182	112.206	151.197	10.1591	40.5906	63.9198	22.4725	105.655	65.8476	32.1603	58.47	132.094	55.8776	152.316	23.5643	20.5018	55.1401	123.525	100.067	8.78213	35.5875	116.499	180.394	184.22	158.7	27.7509	12.2179	73.4162	95.8941	242.176	418.111	16.2778	129.822	2.57038	19.6756
ANXA8L1|728113	7.02889	3.26633	2.44975	0.628141	0.643216	1.63317	0.376884	4.58543	1.13065	0.251256	0.628141	0.251256	20.4422	0	1.00503	0.0628141	1.38191	0.125628	0.376884	3.44598	0	0	0.251256	0.125628	0.188442	1.19347	0.628141	0.188442	0.251256	2.32412	0.628141	1.44472	0.251256	1.38191	0.125628	1.75251	0.753769	0.0628141	5.71608	0.628141	0	3.32915	0.251256	8.22864	0	0.125628	1.13065	0	1.44472
ANXA8L2|244	72.4877	30.7551	20.4909	6.88367	10.6222	11.3869	2.72145	29.8431	5.46958	5.28282	4.0555	0.623266	171.704	1.54749	3.27908	10.9424	8.51121	2.73052	4.1905	30.1494	0.106724	1.04963	1.84098	1.33404	1.9984	11.3111	8.99146	2.32391	1.94931	15.635	1.37033	10.032	1.20064	5.09605	1.6809	11.3661	4.29562	0.29349	55.7417	1.89434	1.38741	27.6174	3.03789	81.1574	0.266809	0.698506	7.4413	0.112593	17.3933
ANXA8|653145	131.554	69.592	39.5434	14.1365	15.7642	25.3756	4.36859	75.4123	12.1975	10.8991	6.39504	1.64598	328.178	3.12466	7.2585	24.987	14.3378	4.02428	7.43173	68.1247	0.221802	1.40313	4.53967	3.02806	5.17485	24.0151	19.4798	5.2612	2.89207	36.4463	2.00863	25.653	2.15866	12.6552	3.8667	23.1009	10.5235	0.836481	95.1387	4.42526	3.85861	61.4571	6.55693	146.628	0.463033	1.9293	17.9385	0.222342	47.1398
ANXA9|8416	7.45903	105.092	357.823	122.817	128.209	61.2078	33.5876	70.3315	9.7949	264.487	209.179	15.1622	6.54531	40.9647	85.9468	1.7032	8.97775	113.625	10.7092	5.34563	106.174	23.6831	173.096	90.7379	22.5014	5.98752	57.2588	387.807	96.7694	61.2881	340.095	59.5724	267.476	38.7298	20.8193	20.5198	6.19425	9.1172	8.50298	58.9327	215.55	102.603	73.6278	250.617	13.7488	497.034	36.7108	161.303	162.627
AOC2|314	1.07955	1.28788	1.55303	0.454545	0.814394	0.383712	0.416667	2.44318	1.38258	1.25	0.379545	3.37538	1.08598	0.340909	0.845833	3.0303	0.435606	0.92803	0.530303	20.2413	1.89394	1.89394	3.37121	2.18712	1.43939	1.23106	2.99242	0.908333	0.30303	2.97348	2.64811	0.227273	0.113636	0.757576	0.782955	1.48674	0.549242	2.16212	0.7625	1.02652	1.55303	0.2875	3.8447	0.51553	1.21515	2.20492	1.74242	2.00758	1.72348
AOC3|8639	6.37525	68.2869	49.7874	30.9339	25.8525	30.6609	19.5639	158.981	12.5072	22.6978	17.1968	21.2339	31.4743	27.9871	17.8282	38.2366	30.4114	24.7809	17.6859	25.1366	65.8292	35.9832	24.1941	87.4515	53.699	18.5408	42.2854	26.1644	7.8953	23.1238	154.609	35.8723	13.3582	30.8656	8.05644	131.179	1.95421	16.1498	29.2871	11.1257	55.3381	34.299	269.527	72.5522	22.3725	33.1884	72.8772	34.4616	25.7277
AOX1|316	11.6903	91.033	7.0319	4.46438	2.65816	13.1021	4.60845	58.8828	1.88995	50.5237	5.89979	14.588	4.77778	2.64487	6.21744	6.65816	5.58719	2.54466	2.88278	3.60181	7.49894	1.86151	2.40829	6.84476	12.3642	2.63663	5.64965	59.5678	2.37905	9.44976	14.6156	8.70282	1.91388	4.2916	0.903775	12.9545	12.4934	0.398724	6.29931	3.58852	2.11324	8.02366	11.5351	13.4498	48.0797	9.95667	36.7608	5.19537	4.69165
AP1M2|10053	82.8161	127.765	422.477	246.916	335.213	330.036	235.26	209.278	220.022	481.733	193.175	359.655	41.0461	183.923	209.661	272.342	76.7944	316.065	217.678	283.767	372.897	189.707	507.19	486.448	112.08	220.32	239.21	607.83	426.7	384.963	384.672	208.344	238.899	262.373	519.345	283.072	496.983	335.876	333.422	267.933	262.979	455.342	328.311	277.884	376.001	789.812	162.75	919.973	421.572
AP1S1|1174	72.6322	140.514	239.82	156.406	148.648	191.491	153.315	187.345	326.492	236.446	174.075	253.598	319.898	102.556	121.042	234.292	227.221	130.096	379.375	434.168	184.826	225.416	111.335	200.093	103.35	268.814	121.065	297.697	226.168	155.699	231.012	220.469	394.362	118.368	112.359	115.2	221.266	280.686	305.626	196.464	134.51	189.684	196.178	273.911	224.803	181.636	78.2567	200.556	142.338
AP2S1|1175	139.507	278.185	499.383	361.507	343.97	498.878	390.175	413.766	651.748	603.281	275.693	618.825	692.61	139.874	275.427	874.998	653.275	342.064	693.155	552.017	454.664	623.375	710.818	517.393	239.436	338.582	494.044	660.981	584.721	417.975	434.744	289.024	262.558	320.312	642.736	482.441	521.612	303.881	974.933	303.247	429.131	444.701	551.433	414.481	691.735	537.615	184.887	399.19	405.031
APBA1|320	14.9228	9.9947	8.57474	2.13055	1.94911	16.9627	2.4922	6.79358	6.4975	7.51931	2.71013	22.7856	7.85234	6.15614	2.83886	11.9249	7.51537	3.70741	47.433	24.3035	2.04362	1.80842	2.24065	3.18476	2.40845	1.1572	4.64092	3.54021	1.46676	1.33954	3.47024	6.56747	1.97486	1.34	0.827957	8.74118	3.53854	1.27169	10.7934	7.04271	3.11555	2.82296	4.77859	7.69499	3.10768	2.43995	4.2046	3.85643	1.70377
APCDD1L|164284	139.668	2.88649	10.7548	0.813008	1.73546	11.4697	4.11194	1.67292	7.17636	5.00313	1.28205	0.312695	0.859912	0.625391	1.90744	18.8856	4.03346	2.89806	1.35835	11.49	4.05816	3.22076	0.254221	1.34459	0.938086	5.67542	4.56504	0.515947	4.76861	0.797373	1.36023	2.75172	0.938086	2.64228	1.17261	20.3605	15.6973	1.02314	10.1038	0.672295	0.749844	2.11914	6.17573	6.75109	0.723577	1.59568	2.65791	0.218887	2.28268
APCDD1|147495	146.056	26.2024	64.4986	28.2633	10.6103	70.5785	18.4052	37.9174	12.9035	99.6557	19.3075	2.65297	18.1865	5.12873	30.3874	12.7018	94.1396	13.2939	40.5351	29.7255	34.6584	35.5863	30.6665	36.1718	15.0322	4.57891	46.613	31.6425	57.9329	49.955	24.1299	32.6088	7.50834	26.4137	28.5413	70.4475	25.5126	107.802	32.5149	3.91586	7.1551	34.7022	39.9038	74.7646	49.9806	7.80807	29.6282	9.0663	30.4025
APEX2|27301	41.7718	61.1263	112.165	54.5457	65.9345	93.4828	101.045	100.23	76.6941	93.5013	44.6899	222.233	126.984	54.8875	50.8119	117.002	157.778	188.229	226.994	95.6999	76.5151	81.9028	139.067	175.601	57.0924	113.183	58.954	133.322	112.938	86.3714	135.705	71.6899	111.191	135.8	98.0454	85.0718	108.207	98.8859	178.96	62.0137	136.538	93.3634	93.9186	87.87	103.18	99.6149	41.2795	172.325	113.44
APH1A|51107	326.138	1046.92	1647.52	606.111	570.568	849.961	739.466	688.059	710.427	1753.4	646.826	1617.24	935.954	523.266	399.739	384.388	1095.68	568.989	1519.82	859.275	723.959	601.152	382.24	756.528	376.086	714.451	438.397	1348.12	884.02	1249.78	564.84	860.398	600.366	866.524	1461.84	529.625	419.587	771.723	1011.57	1207.36	510.715	1363.67	821.024	1204.67	608.573	751.078	378.034	803.741	537.476
APITD1|378708	21.0774	26.3699	54.5534	32.6111	41.2961	26.3425	38.6807	61.9219	108.862	27.661	21.5527	72.4824	110.023	32.7328	41.5331	58.488	38.7335	26.2068	73.0373	65.7947	58.4529	56.9466	120.605	125.929	26.7025	67.443	30.8298	119.937	47.3579	72.5288	53.4388	52.1561	40.8158	20.7609	38.2468	24.0858	59.128	41.9733	69.8748	44.6477	63.334	46.9233	34.0977	37.7764	77.4494	85.4037	28.2686	112.231	71.5323
APLP1|333	7.0131	11.1035	6.08872	3.33756	2.47148	4.77398	7.44402	99.7997	545.183	64.681	7.4567	142.189	16.6244	13.6248	2.26405	19.5682	5.45543	1.10604	163.292	62.2095	5.29024	130.896	13.3502	44.5547	50.0929	13.4935	5.99916	6.14491	11.7448	46.1563	37.7398	3.52767	14.8479	2.64047	17.027	7.37389	2.30249	70.6574	4.60499	1.26743	4.7106	7.91508	4.267	5.13308	2.94423	53.6595	9.54795	7.58344	4.20363
APOA1BP|128240	143.935	431.236	930.882	437.165	317.937	469.538	410.443	486.156	450.965	1169.19	393.626	945.906	559.975	353.482	246.757	420.965	778.935	806.165	958.401	478.634	395.042	547.997	361.193	747.746	252.656	755.242	350.747	1107.82	811.687	696.104	488.058	466.183	496.897	489.117	528.559	355.423	637.579	494.553	467.913	858.68	465.944	1046.98	522.455	498.658	264.19	633.223	173.212	944.017	578.017
APOA1|335	0.00326797	1.52505	2.83224	1.47059	3.59913	0.544662	0.326797	1.63399	1.41612	0.762527	0.87146	1.30719	0.762527	7.57081	0.108932	0.222222	0.724401	0.217865	0.326797	1.03486	0.108932	0.108932	0.43573	177.796	0.163399	0.544662	0.925926	6.75381	1.68845	0.653595	28.8889	0.326797	10.8932	0.326797	0.980392	0.544662	0.217865	0.272331	0.43573	0	1.08932	3.10458	5.17429	0.819172	0.38671	1.59695	0.217865	1.68845	7.35294
APOB48R|55911	3.38705	8.7741	15.8253	6.53361	76.0008	24.7581	16.6039	13.9821	3.20275	27.9802	11.0551	4.76584	36.7493	7.75482	43.2369	15.8488	51.0876	2.74601	19.1725	3.74656	30.3248	7.74105	36.9433	419.648	22.2526	28.9818	13.5807	210.563	47.1074	8.9741	11.4149	13.3196	14.0496	13.3044	7.2686	27.4807	10.124	10.9937	20.8733	6.43251	4.47658	18.5281	57.7383	25.2094	23.4964	16.2997	8.91185	21.5196	10.7438
APOBEC3B|9582	3.73032	7.66256	51.7043	24.7775	11.6667	19.0198	55.4634	126.886	58.6687	17.8645	43.1718	2.19028	124.038	21.5934	12.1834	48.5366	33.2888	23.3368	239.192	30.2533	27.4627	35.9001	96.1027	35.41	86.4784	509.273	5.33881	44.2526	4.92471	61.9678	27.0671	8.38467	68.3949	51.4593	19.5578	10.5373	8.07324	38.9391	186.374	6.05749	114.168	28.1656	16.2902	5.60917	123.841	90.7009	11.6016	31.501	36.6229
APOB|338	0.021245	0.148715	0.0424899	0.0141633	0.0141633	0.0141633	0.0234403	0.260605	0.081439	0.0247858	0	0.106862	0.021245	0.0224488	0	0.00934778	0.0153672	0.00821472	0.0283266	0	0.0283266	0.0150131	0.000566532	0.161178	0.187947	0.00134551	0.0141633	0.000708165	0.0141633	0	0.649175	0.0424899	0	0.00354083	0.0220239	0.355711	0	0.0141633	0.00708165	0.021245	0.148715	0.0431273	0.24028	0.0472346	0.00828553	0.0870335	0.319807	0.0542455	0.0495716
APOC1P1|342	0.255754	1.90537	1	0.895141	0.511509	1.40665	1.9821	1.53453	0.478261	5.1688	2.74425	0.892583	10.9591	0.767263	0.511509	5.36573	5.47826	1.8977	3.45013	1.52941	3.18926	1.1509	16.8849	7.17903	2.17136	4.93606	1.27877	11.7263	0.639386	1.75448	1.76982	3.24041	2.17136	2.68542	1.98721	3.28389	0.895141	2.24808	1.63427	1.1509	0.511509	1.27621	2.72123	6.46036	9.78261	2.42967	1.1509	2.41176	0.511509
APOC1|341	13.6426	307.672	171.582	200.984	125.781	319.609	307.055	306.295	132.781	934.607	550.914	233.65	1426.66	188.477	141.34	594.141	935.295	235.766	748.613	357.242	575.133	550.328	3314.91	1133.2	291.666	672.543	226.967	1681.7	200	385.018	313.717	662.695	933.531	811.314	207.191	409.195	147.43	363.43	167.582	190.867	160.129	199.373	593.697	792.758	1334.03	295.957	179.871	364.086	113.184
APOC2|344	1.0425	12.0106	6.87782	16.8552	17.1102	55.8008	10.1381	27.3825	22.2483	47.6056	53.1155	33.7304	132.085	21.3001	19.7888	124.976	55.3041	14.3758	32.178	35.4661	24.8088	40.6932	67.6401	62.3519	27.5405	65.2497	13.9761	241.264	72.4316	56.7928	11.6029	20.9973	29.3307	37.5352	4.30279	38.6467	6.2178	9.49535	37.1487	16.9203	2.65073	44.9243	240.517	78.5166	39.3254	42.7224	18.6799	40.4542	9.28154
APOD|347	780.825	876.59	3088.19	897.158	2305.11	449.827	3224.9	7333.82	17.7834	266.562	100.043	144.456	61.5858	155.568	250.745	41.2213	446.717	154.61	77.7636	1674.66	252.071	849.315	136.112	48363.4	513.497	40.2893	1634.52	1520.49	100.783	730.124	235.196	784.131	1127.34	19522.1	2808.37	1711.82	3.79447	14.1154	206.372	197.935	1107.54	435.041	20916.1	775.017	176.905	246.043	2160.09	77.6166	152.538
APOLD1|81575	16.8583	53.3957	44.0954	42.6851	29.8232	18.3402	16.2463	186.048	129.246	72.4913	31.1887	44.9887	94.4125	72.0943	18.2136	38.8515	19.8695	42.3738	33.6751	15.8887	34.4579	29.7743	49.7983	45.9513	30.2227	16.3243	41.7618	32.632	9.55164	40.3661	51.8491	49.48	11.8421	64.6698	17.9686	68.711	7.94518	24.5457	38.197	24.0438	51.7461	17.2265	25.5493	57.4741	22.9866	40.8761	133.832	44.6966	26.6235
APOO|79135	34.701	56.7968	81.5646	56.4072	37.6614	50.5356	65.6737	80.5189	140.422	63.1486	31.956	262.131	72.5374	44.5515	43.4257	195.846	110.796	54.3228	116.867	380.881	38.1266	439.178	135.758	110.914	44.489	74.9569	39.0915	92.4776	79.4195	78.2128	103.215	88.54	75.0369	59.657	29.6456	43.2454	204.477	67.2603	25.9314	65.46	104.118	76.1891	66.3456	54.0422	97.4828	113.267	40.7423	130.344	103.828
AQP1|358	187.814	523.683	516.698	217.71	158.524	232.36	104.315	529.725	441.715	238.711	127.557	108.478	241.157	183.203	111.723	200.651	318.069	77.8103	80.4647	244.462	230.75	145.961	270.747	335.68	317.88	91.2983	410.248	202.829	168.33	229.251	531.562	420.616	91.923	123.642	72.8347	471.841	54.0928	142.88	248.949	70.225	210.574	356.449	687.428	634.796	226.526	266.462	435.041	139.782	153.404
AQP4|361	7.46619	0.211553	1.36206	0.299459	0	0.282844	0.0291731	0.289799	2.53091	0.357419	0.10626	0.176005	3.11399	0.183539	0.202859	1.6507	0.405719	0.167311	0.400309	0.338099	0.202859	0.11592	0.0579598	0.263717	0.11592	0.888717	0.270479	0.367079	0.0579598	0.811437	0.705178	0.299459	0.0869397	0.0386399	0.241499	0.560278	0.0965997	0.986862	0.492658	0.0193199	0.231839	0.502318	0.482998	0.560278	0.183539	0.15456	1.0626	0.425618	0.685858
AQP5|362	132.838	3.70191	2.50082	0.599455	0	1.2703	8.62616	0.626703	27.5782	24.946	0.599455	2047.48	9.37548	0.295913	0.163488	318.543	9.06049	0.871935	130.735	529.501	0.217984	874.375	0.163488	1.52534	0.13624	0.285559	3.0327	52.5847	3.87302	0.182016	0.978747	2.9951	1.36185	0.27248	67.4327	27.3488	9.87248	0.0544959	160.651	0.326975	1.68556	31.297	0.67248	13.3172	7.92207	0.0544959	3.69482	0	0.217984
AQP7P1|375719	3.75453	8.77083	3.19656	6.31069	4.42844	0.452899	1.53986	30.5236	0.679348	0.271739	1.04167	1.67572	2.24275	1.94203	0.480072	11.0127	2.03623	1.81159	4.53623	0.721014	13.2545	0.724638	0.94837	34.4375	10.9094	0.398551	8.74094	2.66667	1.13225	0.746377	20.0525	0.724638	0.317029	0.900362	0.815217	29.0389	0.452899	0.226449	2.59149	2.39674	10.8931	1.89402	52.0335	7.32156	3.29982	3.02627	8.83877	8.8288	2.57699
AQP7P3|441432	0.759013	1.42315	0.559772	0.379507	0	0.474383	0.474383	7.18027	0.0948767	0.0948767	0.474383	0	0.664137	0.527514	0	5.926	0.189753	0	1.32827	0.28463	3.96205	0.0948767	0	3.70019	0.85389	0.0948767	0.474383	0	0.56926	0	2.08729	0.379507	0	0	0.56926	3.17457	0.0948767	0.189753	0.189753	0.474383	0.664137	1.19165	8.28273	0.189753	0.664137	0.362429	1.32827	0.759013	0.664137
AQP7|364	3.00748	14.2477	1.54032	6.85287	4.86284	0.249377	1.4547	48.2352	0.207814	0.166251	0.619285	1.16376	4.77722	2.24023	0.166251	4.03159	1.202	1.78554	2.07066	0.290939	19.2968	0.285952	0.608479	35.2236	14.1297	1.08063	5.68828	3.21031	0.768911	2.16126	42.921	2.03658	0.831255	0.997506	0.134663	51.0765	0.120532	0.124688	2.43059	1.37157	17.5378	4.07315	84.9817	7.42976	2.01081	4.59933	12.9526	7.9202	4.16376
AQP9|366	0.105783	1.69464	0.105783	0.123413	1.32228	0.215797	0.934415	2.90903	3.31453	0.846262	2.28914	8.07475	49.8364	1.07546	0.617066	1.25176	13.9457	4.03738	19.409	1.67489	8.95451	6.97884	6.84803	1.09556	1.46333	15.7969	0.38787	0.458392	0.352609	0.934415	1.01587	0.307475	3.26164	8.14528	2.50353	5.00599	3.2969	4.58392	8.45769	0.211566	0.141044	0.334979	4.70628	2.0275	4.47814	5.16467	0.634697	0.176305	3.19111
AQPEP|206338	0.109349	1.03882	0.0273373	0.51941	0.301531	0.191361	0.13532	2.28267	0.164024	0.177693	0.150355	0.113997	0.224166	0.0546747	0.164024	0.129032	0.112356	0.150355	0.382723	0	0.628759	0.0273373	0.0546747	1.35566	1.05249	0.437397	0.232367	0.0869328	0.20503	0.0273373	1.30153	0.136687	0.669765	0.164024	0.628759	1.23319	0.0273373	0.166484	0.263805	0.0546747	0.82012	0.360033	4.2053	0.642428	0.248496	0.478403	1.42154	0.551121	0.218699
ARAP3|64411	3.38485	20.9574	27.1946	8.64372	9.32222	15.6783	9.61229	17.3263	48.7716	20.1822	7.65658	17.9174	11.2496	8.37342	9.42486	17.5397	13.9659	8.97071	7.87092	21.3384	15.2696	12.9583	13.6702	19.1005	15.4453	8.96523	17.3005	14.3977	5.46559	11.4313	19.1319	18.3377	7.1748	11.7068	20.518	23.4342	4.94165	14.267	13.4761	4.4432	16.9476	12.9259	32.3863	24.1257	12.1045	12.106	15.5751	11.8838	9.69755
ARC|23237	0.720268	0.273702	1.91792	2.05327	4.75276	0.506198	0.562144	0.519263	32.4144	0.0502513	0.368509	3.52831	0.232831	0.0670017	50.8295	1.94807	0.615075	0.132328	3.61173	12.0452	4.1273	1.22278	0.105193	1.23484	0.0670017	3.57889	6.20436	1.73166	0.132328	0.234506	0.351759	2.84221	0.519263	0.435511	1.2057	3.56248	1.73099	0.536013	0.350084	4.30754	0.167504	2.45963	5.56047	2.58459	1.47906	4.93501	15.1079	0.0335008	5.90352
ARF1|375	527.38	1086.3	2614.9	1251.05	961.688	2057.17	1269.62	3090.3	965.057	3621.5	1297.86	2191.41	1749.9	1237.43	751.37	2268.11	2460.42	1684.88	3379.03	4408.66	1418.41	3306.25	1122.02	1257.64	779.359	1851.18	933.809	3217.09	2158.24	1074.44	1974.64	1642.57	1774.67	1854.27	1813.72	1511.57	2421.39	1729.37	3608.92	1825.76	1801.07	2070.78	2256.22	2264.82	2521.94	2037.26	838.246	2861.02	1186.07
ARFGAP1|55738	51.2797	86.2141	117.592	75.3105	82.2533	160.396	85.3915	428.464	121.821	184.819	60.2719	127.14	164.154	200.237	72.2876	233.811	146.715	93.2366	144.597	104.173	140.288	209.099	311.906	149.127	114.628	172.326	117.133	131.575	91.2667	133.247	149.637	83.3176	393.722	91.569	219.595	160.024	132.632	149.162	268.884	64.1536	83.1454	89.3268	163.242	143.92	127.317	93.3389	50.3869	167.974	157.391
ARHGAP10|79658	10.7942	33.9389	26.9409	17.7234	20.7723	37.6358	19.4376	39.191	15.8421	15.9781	13.8258	58.2776	43.1518	26.5262	21.7779	103.284	69.8309	8.53286	125.675	21.0647	36.6256	17.2404	16.0586	66.488	54.6602	39.7137	21.6149	48.6149	11.513	37.433	46.865	27.6485	35.6974	41.1105	2.57259	41.786	24.2323	81.7203	65.2354	29.7427	58.9231	14.8548	49.0423	91.1656	63.1854	13.3362	39.9149	15.5135	67.214
ARHGAP11A|9824	9.91487	18.1918	30.8954	5.81395	8.3959	14.92	14.5709	32.2921	94.399	30.3742	25.4706	100.713	59.4944	20.6697	9.36369	19.5344	25.5446	38.3707	94.2269	22.1662	24.2743	10.6133	33.4749	33.815	24.7243	86.801	3.50462	16.8261	5.52821	18.9011	32.7204	3.88718	33.0769	12.625	12.1391	6.14318	46.4595	23.3301	69.4993	5.70154	29.657	17.3555	11.9787	13.0455	33.5696	48.7087	8.03938	22.6513	25.1959
ARHGAP11B|89839	2.63303	2.02599	4.05199	0.955657	1.94954	2.59939	3.32875	5.77217	16.7049	3.44037	4.81651	14.828	9.67125	3.21101	1.22324	3.01988	4.49235	7.25076	18.3387	2.21483	4.05199	1.37615	7.48853	9.13685	5.0948	20.4075	0.611621	2.62691	0.496942	2.21713	3.80275	0.840979	7.25535	2.3318	2.02599	1.48394	4.30505	7.0604	8.01223	1.49083	4.70183	2.09404	3.09633	2.263	5.76988	9.27141	1.79664	6.1789	3.27676
ARHGAP20|57569	4.21389	2.41839	3.37496	1.0283	0.863771	6.45114	4.39092	3.16716	3.29878	2.37743	2.62422	0.419546	2.52682	0.731655	2.07782	0.913129	1.20484	1.30898	1.43666	0.20566	0.954261	1.78513	0.547384	2.1772	1.52353	0.832346	1.80158	10.4982	1.17637	1.25699	1.87792	3.2412	0.649885	1.4643	0.213886	3.92629	0.0164528	1.36953	0.711418	0.534715	0.658111	1.74827	5.54525	6.14018	1.333	1.30816	2.93682	1.16173	1.68641
ARHGAP24|83478	3.46319	10.4327	18.5032	8.52023	10.5775	24.58	11.47	12.6402	5.49732	15.5032	9.14554	4.36836	14.7265	5.37543	9.85739	13.1643	12.1509	4.26377	23.394	3.32765	10.8886	10.4339	16.3372	38.9456	13.5407	5.01877	14.6148	7.58045	6.48464	8.68723	8.87372	13.0168	8.40809	6.15553	3.28011	16.764	5.41199	4.80132	9.65505	5.89956	13.9515	10.5561	24.5561	21.8245	9.5607	8.13823	15.7314	6.01097	5.38762
ARHGAP36|158763	0	1.01156	0.433887	0	0.0444364	0.00469653	0	2.18569	2.60116	0.0722543	0.0361272	0.216763	0.218569	0	0.287211	0	2.99928	63.6452	1.34321	0	0.0769509	0	0	0.872832	0.00289017	0.000722543	0.361272	0.477601	0.541908	0.0361272	3.52348	6.78829	0.0361272	0	0.0722543	0.781069	0.00541908	0	0.216763	0	17.41	0.037211	0.0361272	0.921243	0.0101156	4.69653	119.706	0.00108382	0
ARHGAP39|80728	10.6216	17.7891	31.8903	15.5398	36.1715	19.0457	12.6554	32.9481	81.4741	22.2438	17.4964	13.3891	25.4574	8.86931	31.1964	20.8315	24.6824	34.6602	52.8497	9.25465	21.6572	16.8034	8.62891	14.2202	11.2655	11.703	19.038	17.3527	19.3877	44.8347	28.203	18.2945	43.8642	12.777	24.3952	12.0671	17.2307	27.0707	18.8996	23.7038	50.1075	16.6291	18.1168	20.7222	27.7804	17.2669	9.5097	51.102	32.2697
ARHGAP6|395	4.26037	5.73783	5.76281	2.84136	2.44811	7.31342	4.75045	11.3945	2.78985	14.8687	3.3608	2.65516	2.35127	4.23049	2.89647	2.33067	2.24646	2.53902	2.795	1.00438	4.21504	2.27942	7.40201	5.62297	3.03708	1.73011	3.48957	3.77286	2.19057	2.48571	4.62761	7.20474	1.68092	2.44656	0.216585	7.23152	0.128766	2.5367	2.64795	5.1249	3.54108	4.09786	9.9642	6.58769	1.22714	3.73345	8.50322	3.98094	2.11924
ARHGAP8|23779	17.3119	50.0147	66.3284	60.9559	38.3113	71.3824	19.0772	32.5674	9.15441	127.893	28.435	54.7684	49.3272	71.6017	39.171	53.6023	32.6961	31.6985	46.6513	43.7537	47.6152	65.394	63.6728	81.6299	75.9773	34.6685	24.5962	82.7096	36.7396	119.021	53.6391	20.4363	57.5778	68.652	110.992	26.0165	25.625	141.605	32.1434	44.1189	74.1379	32.6477	34.1183	68.4375	89.1348	60.2402	40.231	1.15564	47.6238
ARHGEF15|22899	3.92119	24.4453	27.3578	11.8723	10.3781	14.0993	8.20755	22.6759	5.88773	16.2669	9.96072	9.69792	11.6774	11.0618	10.5494	14.9463	17.2598	7.94805	10.6528	6.61987	23.8175	10.626	18.1835	31.1799	21.1011	14.1837	19.0294	16.6645	6.72149	9.70603	30.0895	21.9181	7.57324	8.29397	7.56665	31.9719	2.83426	17.1429	14.4184	7.42169	18.8796	18.096	64.9437	23.9516	20.0811	17.7788	15.6873	15.5618	16.3991
ARHGEF16|27237	8.92395	22.7574	54.6215	22.9629	49.3427	21.7352	44.6351	39.3762	104.621	64.0634	35.3902	74.3472	91.0426	60.5899	40.4473	34.5794	20.077	14.8162	45.8533	43.8185	57.2608	39.8674	160.257	119.149	21.928	23.0312	31.1983	69.5894	22.7388	30.5088	43.5831	38.8981	50.2164	21.6732	31.053	46.3929	43.9665	142.817	63.6763	46.2924	47.8791	56.6704	17.4531	33.7402	56.7311	102.828	26.8402	72.6836	67.636
ARHGEF19|128272	98.9945	16.6325	129.813	66.7107	42.1175	65.6145	86.758	55.7475	244.766	58.0134	28.8496	157.308	280.596	65.4114	56.8003	106.413	69.6295	24.9582	260.325	238.529	57.5881	40.5294	46.1569	67.6559	49.9044	122.339	52.8362	117.009	70.3964	38.3127	159.454	44.0827	49.6394	25.1723	104.781	54.6589	34.4915	64.0164	30.3894	66.2201	126.782	107.23	24.4248	48.2151	91.1748	44.003	33.6952	2.86355	39.245
ARHGEF4|50649	10.3946	8.84928	6.08653	6.98911	2.03209	10.3301	6.03438	7.88338	76.5175	7.60917	5.47049	25.9438	28.5711	1.83983	3.74126	4.55673	25.1057	1.96218	29.3209	18.6722	3.08968	5.80287	15.5375	10.0931	3.18854	30.159	5.96819	4.30401	2.78281	4.31032	5.27994	6.4596	3.71404	3.02665	11.945	9.82808	24.7298	31.8994	3.06332	3.08424	2.14155	4.53324	8.14269	7.17822	2.71375	2.56447	14.8799	2.1702	5.06132
ARHGEF6|9459	55.1486	39.0429	46.6654	23.9077	85.3708	74.7189	29.2791	131.012	40.4938	40.6928	24.3847	91.0923	23.7269	23.7155	114.066	16.5605	59.7207	39.1472	222.79	13.306	128.586	12.7553	24.4992	66.9109	76.1776	43.9013	35.1804	48.8656	32.1724	26.2048	270.647	36.9213	23.0597	15.3564	6.21806	69.2085	22.6452	16.7085	36.3388	17.7613	32.6942	49.3903	102.984	111.443	51.8434	218.573	84.7521	26.8744	499.014
ARID5B|84159	657.932	506.108	635.876	401.747	265.662	1318.16	321.641	491.417	265.224	459.576	149.418	354.791	253.728	67.1937	243.551	260.907	384.569	76.3423	254.413	195.53	194.329	167.551	239.58	288.006	647.154	100.269	300.097	268.505	319.095	140.311	321.533	536.786	197.681	347.428	160.409	469.274	200.226	257.806	398.958	429.323	140.515	390.505	649.486	741.968	580.825	163.449	938.469	435.326	120.994
ARL4A|10124	31.557	37.9244	66.8431	31.3404	8.62592	46.3954	29.3591	37.575	28.0916	40.4347	20.0866	48.0433	59.9747	17.022	16.2925	63.5556	27.042	16.7388	11.0133	4.48035	17.7382	40.2215	97.2179	24.0819	19.3704	18.2212	43.5316	21.9047	5.47102	20.7305	26.0493	66.975	20.544	20.0533	13.2448	38.3181	41.9221	19.1539	55.4227	24.8185	29.3618	23.3328	32.3904	73.0843	44.8751	22.006	47.1899	37.7372	33.4111
ARL6IP1|23204	246.724	720.79	1605.33	566.759	1165.23	942.638	818.202	2098.55	1577.51	918.351	649.511	2358.76	1217.58	615.05	1092.32	413.516	715.974	1204.58	1981.69	295.281	1630.44	394.553	711.007	1295.39	448.689	614.505	516.658	1275.47	1001.43	1874.71	1557.14	637.821	1177.09	1248.18	549.892	501.345	845.502	739.417	1229.05	1082.81	1523.98	1306.69	672.372	1846.55	988.425	1493.22	430.264	1678.54	2552.43
ARMC3|219681	0.134202	1.24617	40.1553	19.163	12.4962	1.39954	3.51802	0.21089	0.364264	3.52569	3.08474	6.82822	1.26534	0.345092	5.65567	0.613497	0.0383436	1.89801	0.134202	0.287577	0.939417	5.70782	0.0870399	0.302147	4.46511	0.560966	2.45169	18.7684	16.4356	0.0191718	2.03643	14.7519	2.39647	8.99847	1.6135	0.786043	0.153374	0.32592	1.34202	23.5207	1.99387	1.13113	13.5909	0.843558	2.40376	1.03566	0.920245	29.2132	3.3148
ARMC9|80210	31.2953	48.6103	96.8953	33.821	57.4694	75.2054	39.9902	53.9459	46.1508	82.9508	22.5996	60.4349	45.6989	27.9289	51.1069	35.8161	51.1902	37.9866	22.8215	45.0197	38.5951	58.0573	68.3315	36.162	40.9776	23.1119	41.5951	130.676	43.8313	38.94	57.9034	35.1002	31.447	25.0425	19.289	53.2541	18.6367	29.6331	54.4635	42.7011	40.8081	77.8756	53.0291	83.2018	92.6532	106.647	33.1709	56.089	56.34
ARNT2|9915	36.9904	46.6759	102.883	134.358	11.643	38.5583	23.1673	61.9607	178.55	329.451	70.4468	51.8956	113.057	70.0325	18.1637	5.26297	22.3824	111.58	101.94	38.7881	53.2068	14.9614	42.7603	13.6071	12.8495	12.1333	12.394	103.35	67.7047	7.30974	86.7092	9.02865	24.1501	3.47282	14.184	13.8055	3.71984	38.8495	54.7869	6.7361	67.5019	207.254	62.8083	18.9574	7.23339	161.163	30.646	44.7717	58.5583
ARPC1B|10095	41.2503	239.769	349.41	177.173	291.208	680.39	371.029	395.667	149.402	1068.28	516.98	82.3745	389.995	168.86	254.136	521.704	704.237	141.823	312.084	195.257	278.892	734.756	324.43	555.572	360.673	327.046	375.6	604.593	407.846	226.223	467.938	406.728	512.418	471.659	421.282	443.133	693.367	100.378	968.915	211.954	281.347	316.241	797.52	361.577	555.506	282.276	172.483	230.189	322.779
ARPC5L|81873	67.8277	172.104	243.051	127.583	142.792	184.333	142.71	115.844	379.56	181.095	142.474	213.684	302.591	105.678	142.614	516.837	294.711	212.974	523.623	969.987	184.36	338.859	296.026	302.057	126.634	241.062	137.304	258.206	223.988	158.716	232.534	238.613	408.116	224.206	150.031	151.41	313.907	223.435	268.001	169.766	278.157	195.691	253.678	146.21	281.088	254.564	92.4726	172.028	165.424
ARRDC1|92714	69.5245	110.08	146.77	116.675	247.716	364.447	109.268	156.507	92.5607	243.243	139.955	108.557	123.381	108.911	148.001	126.981	107.6	60.2653	177.385	122.384	127.691	222.852	652.974	511.455	72.4853	73.7243	141.397	220.765	234.324	132.047	148.617	142.937	277.362	107.04	73.2862	98.9675	73.454	90.492	75.5417	167.926	211.382	88.0705	172.89	162.525	130.479	111.061	76.3585	99.2623	169.324
ARRDC3|57561	263.846	144.363	199.336	82.2671	66.3255	161.702	113.81	206.579	141.531	223.698	48.2449	164.731	83.0634	81.8138	109.41	195.375	175.006	56.5529	68.82	28.0019	65.9686	83.8787	66.3988	147.642	119.904	115.628	86.973	36.4157	54.2855	185.329	93.3727	163.19	51.9584	69.607	67.8724	174.635	27.9885	61.4495	94.8202	68.5321	42.253	53.7092	166.206	393.774	74.1709	93.6613	131.55	263.382	146.408
ARSI|340075	0.666667	8.27101	11.0087	2.07535	5.06636	28.0502	12.9383	6.85705	4.25116	21.0223	11.0549	3.8524	10.0623	0.325581	6.17147	5.0062	9.82419	3.66295	3.02202	6.21333	12.0099	16.7792	4.25891	2.67814	4.32589	6.76186	17.493	3.33457	8.29519	3.33705	2.23969	8.04217	1.86636	4.2924	1.78295	22.7581	6.96031	4.74853	15.0977	1.17798	1.22605	15.3048	20.1662	16.791	4.89581	2.2462	2.03597	0.342016	10.2924
ART4|420	0	0.314033	0.490677	0.785083	0.588813	0.0981354	0.196271	3.1894	0.245339	0	0.412169	0.255152	0.60157	0.806673	0.343474	5.8528	0.914622	0.0176644	0.223749	0.00686948	0.0981354	0.0225711	0.294406	0.0981354	2.18842	0.426889	0.741904	0.117763	0	0	2.11874	0	0.0981354	0	0.177625	0.539745	0.292444	0.156035	1.29539	0.518155	0.0196271	0.208047	1.11776	1.91364	0.245339	0.584887	1.43278	0.147203	0.363101
ART5|116969	3.22823	1.98949	2.21471	1.47523	1.30105	2.87237	1.14565	7.72372	24.7282	2.00075	0.720721	16.8851	1.2012	0.412913	0.677177	0.978979	1.58408	0.874625	0.432432	4.83784	0.998498	2.07583	0.972222	0.555556	0.535285	0.376126	2.59009	0.232733	2.1997	0.713213	4.24174	3.82883	2.21471	0.384384	1.66291	3.52853	3.56607	0.334835	0.595345	0.45045	2.55255	1.81306	2.43994	4.12312	0.771021	1.21246	2.90165	0.0750751	1.58559
ARTN|9048	0.193157	7.56898	16.9029	6.06236	13.4928	5.24283	1.02649	15.8681	15.4249	40.8482	1.84492	2.4851	3.80022	36.0911	16.3604	13.5717	7.41336	14.7655	4.3096	3.7362	71.7307	1.29691	0.779801	10.585	3.34382	10.2202	48.1198	20.2373	6.83554	3.52097	29.6209	9.86755	3.34989	1.11976	26.0613	2.24614	6.87638	4.70364	48.1766	5.95088	3.234	14.7219	1.74503	8.85265	1.6181	12.8902	3.46634	1.70419	85.0756
ASAM|79827	47.9626	22.0049	33.1297	13.5081	64.3958	98.3781	52.7739	32.7285	9.19509	38.1811	20.603	21.2775	7.03516	3.9758	22.1871	5.53573	33.665	11.5788	16.9198	10.4287	19.3588	15.3656	5.6465	19.5682	29.4442	19.983	13.955	10.775	12.3134	8.07372	11.9463	20.8408	5.30813	19.8106	1.64802	46.6696	9.24612	4.75198	10.4764	8.55728	6.18677	24.772	57.5894	42.7047	10.5709	9.04348	34.9769	3.16862	36.6552
ASB13|79754	27.9718	69.6742	440.358	129.502	60.2965	113.017	32.4165	141.165	65.4327	302.123	78.2471	185.561	50.75	71.8869	66.1237	40.8719	83.4978	102.163	161.317	68.0088	369.185	24.037	77.0619	52.0077	33.7482	78.448	85.5282	119.303	91.8375	139.143	422.137	73.3529	38.5732	32.8331	240.114	112.503	55.5271	50.9832	164.517	171.687	49.1032	182.363	102.168	269.981	54.0684	270.387	82.4835	176.652	113.536
ASCL1|429	0	15.9618	0.0405622	0	0	0	0	0.0803213	1.36627	1.04337	51.6036	0	0	13.5916	0	0.0437751	0.0803213	0	1.55462	0.120482	0.0803213	0	0.361446	36.5675	0.120482	0.0803213	0.0803213	0.0401606	0	0.522088	60.2281	0.0401606	0	0	0.326104	1.70602	0	0.943775	0.0401606	0	1.10241	0	0	18.1116	25.9129	0.877108	0.0803213	46.149	0.035743
ASCL2|430	0.21191	2.06545	1.93133	9.15343	24.0038	2.09281	15.0467	10.3155	188.139	2.81652	7.3294	1.2323	19.2758	39.7259	5.64914	8.13841	8.87661	0.321888	9.26502	10.2028	0.962446	6.32028	8.45708	89.323	13.3369	2.59227	1.07296	12.8015	2.25322	1.98605	21.9211	2.06438	111.47	14.4185	37.7854	2.36052	1.60408	7.60783	1.68723	3.00161	8.43777	7.99303	34.3643	2.96674	45.6127	1.47157	1.80687	0.912017	4.59067
ASF1B|55723	21.2308	21.2554	102.142	55.9118	32.11	29.7869	122.347	88.5641	384.268	90.6724	67.39	251.695	158.568	61.3499	25.6953	156.699	64.0601	114.026	105.172	220.048	124.998	51.2509	223.636	101.448	47.1821	62.9381	12.6105	110.977	46.2549	102.327	98.3895	12.7497	65.4021	67.7824	81.6661	12.2113	125.056	160.162	264.255	12.0974	92.917	54.4187	32.3265	29.3591	173.353	134.746	16.4542	78.6254	115.527
ASPA|443	1.21255	2.06847	1.03424	0.713267	0.64194	1.56919	1.64051	3.38802	0.249643	0.713267	0.392297	0.870185	0.713267	0.570613	0.784593	0.64194	1.10556	0.64194	0.677603	0.499287	2.31812	0.570613	1.78317	3.31669	3.38802	0.53495	1.21255	0.21398	1.0699	0.64194	1.53352	1.67618	0.606277	0.499287	0.0713267	3.78031	0	0.0713267	0.249643	0.606277	2.02782	1.35521	7.45364	0.784593	0.499287	5.7418	3.602	1.56919	2.03281
ASPG|374569	0.590046	0.436121	0.218061	0.0769625	3.7137	0.0513084	0.159569	0.436121	0.12981	0.384813	0.0256542	0.333504	0.461775	0.102617	0.718317	0.310929	0.0574654	0	0.0938943	0	0.0548999	0.284761	0.188302	0.58902	0.25962	0.216008	0.667009	0.256542	0.0256542	0.564392	0.282196	0.230888	0.230888	0	0.44587	0.76706	0	0.162134	0.0107748	0.692663	0	0.161621	0.692663	0.631093	0.0769625	0.183684	0.140585	0	0.153925
ASPHD1|253982	1.20757	1.63185	7.21279	9.8564	6.16841	1.7624	1.04439	19.094	40.2696	21.045	1.01175	13.9687	30.8166	20.1965	4.47128	31.767	2.61097	1.1423	14.218	3.91645	4.78003	43.8166	1.75849	11.6416	9.36031	8.59138	2.08877	21.6841	0.793734	17.1749	21.0013	1.86031	4.50392	5.95822	30.9243	4.14491	6.00522	6.63577	2.52089	1.43081	1.07702	7.33159	2.21932	4.87337	0.881201	24.3629	2.73564	18.1462	12.3368
ASPHD2|57168	0.563236	7.09448	5.44793	2.20676	2.47449	5.87926	4.94295	5.56867	18.1576	28.3731	7.07667	14.9897	9.69001	3.60006	2.81648	3.52369	16.9408	2.53215	8.18805	3.54965	5.1802	8.12828	23.4784	4.58406	7.67129	8.12134	3.10746	10.1108	7.21944	7.46785	5.21944	5.44642	2.53607	3.97434	4.83851	8.09659	5.06761	11.5892	6.93722	2.71295	2.7211	10.1627	9.49019	6.0815	12.9505	11.0667	3.48566	16.4144	5.54211
ASPM|259266	6.75881	10.2281	40.1275	7.37785	5.98989	12.2301	32.1657	30.7963	95.3203	33.3227	29.6433	274.015	42.1538	12.1386	5.17776	21.4943	53.638	29.6776	62.6296	55.0391	14.1929	10.7867	8.17303	42.0806	24.2988	59.127	0.864155	20.6375	5.39791	21.0722	14.3906	0.815395	34.3518	20.3964	15.4273	2.81311	62.7428	21.1094	51.4511	3.87003	40.4374	12.2808	11.8966	9.26435	46.5388	37.5504	4.50832	30.4041	12.4943
ASPN|54829	7.62222	309.17	573.518	138.718	213.76	4174.85	1850.56	189.483	24.9742	1765.24	729.445	28.3556	61.1938	32.0338	630.969	48.6182	62.0404	150.088	10.4222	204.222	868.154	376.877	47.8938	109.206	85.0227	326.132	488.932	91.8227	616.798	65.5418	69.3151	263.23	25.3733	153.894	16.0427	769.111	9.56978	34.84	35.808	61.3676	40.1084	573.705	645.212	705.809	8.88133	72.8658	162.789	23.2498	441.016
ASPSCR1|79058	27.4298	36.297	68.1698	47.6327	52.7456	78.2251	46.3573	82.9834	78.6621	170.049	26.6278	104.965	84.3352	28.9491	40.4004	143.985	82.969	79.849	39.5072	84.4082	54.4928	46.8573	159.047	140.765	41.885	39.63	56.755	110.382	68.8573	100.69	68.3656	37.8733	72.2605	57.1831	65.4353	44.0199	43.4132	96.8601	59.9801	49.3756	58.1267	48.1067	79.0376	44.6399	79.3418	42.9906	25.4945	81.2439	79.8567
ASS1|445	324.761	88.819	151.571	46.1688	170.512	34.5125	119.531	313.681	704.531	58.3537	115.47	20.3776	618.974	65.075	124.681	471.433	932.207	20.3565	634.586	198.458	56.714	945.962	513.835	1062.38	81.5891	477.086	216.949	370.795	17.6846	75.3998	87.1366	159.937	1143.72	591.835	562.013	454.027	938.583	376.415	497.162	216.228	34.4531	93.7762	731.557	193.394	442.172	36.1188	116.401	18.7396	93.1805
ASTN1|460	0.178845	0.459888	3.16939	0.778487	0.298416	2.11778	3.44328	1.08891	4.10041	0.187021	0.390904	0.547266	1.06362	0.855902	0.728155	0.188554	1.0419	0.0776699	0.20184	2.69545	0.0799693	0.562085	0.0881451	0.394737	0.862289	0.32141	1.14946	0.260347	0.0546755	0.896525	2.35769	4.20312	0.154062	0.485437	0.0597854	2.43255	0.676546	0.257026	0.7279	0.663005	0.370465	0.217425	2.14614	5.80608	0.208227	0.481604	5.95376	13.1937	0.459888
ASXL3|80816	1.80945	0.292854	0.592217	0.175713	0.188728	1.16491	0.300794	0.274893	1.91332	0.105818	0.299362	1.03475	1.8222	0.670311	0.201744	0.106729	0.0780945	0.254588	1.17142	0	0.203176	0.0130157	0.0130157	0.0995705	0.169205	0.0260315	0.195236	0.12365	0.566185	0.169205	0.195236	0.195236	0.0260315	0	1.85735	0.410647	0	0.0390472	0.0145776	0.0130157	0.0390472	0.0390472	0.18222	0.657295	0.10725	0.100742	0.806976	0.00143173	0.0911102
ATAD2|29028	20.4981	36.1243	90.6878	36.9107	52.9193	42.633	62.8622	132.896	624.971	52.9085	98.9363	107.428	130.7	39.4305	40.7441	57.0758	86.4294	99.9121	278.927	98.6768	68.9673	21.5536	76.947	282.942	55.8553	98.2849	10.8423	42.1246	40.3263	127.349	77.756	34.7338	103.41	78.6741	27.1233	8.76904	75.9736	93.8575	112.47	48.7302	299.63	63.3809	27.8246	48.8853	83.6542	122.952	37.6535	167.05	84.4435
ATAD5|79915	6.01969	4.85079	6.06557	2.45331	2.73549	5.50853	4.81851	6.8719	34.1133	2.99736	4.73873	67.8191	8.09825	4.41799	2.67357	5.46204	6.68372	7.11003	12.9523	7.50122	5.71518	2.13337	3.84409	10.4273	10.3394	11.056	1.04121	5.37048	2.9527	10.0069	7.53837	1.88327	10.1955	16.5047	16.5231	1.84227	7.81912	6.34389	11.7087	5.50609	10.7978	4.71579	4.98132	3.04872	15.6098	8.89464	2.79151	14.716	10.4397
ATF3|467	124.488	42.5331	40.2676	36.6402	19.5433	35.1194	65.5126	39.104	66.0461	91.4869	22.776	35.8801	67.286	18.7596	75.4336	973.422	76.6571	26.9093	106.456	40.0461	115.176	202.994	77.7417	158.857	132.177	109.403	120.018	83.9677	75.6766	159.004	157.039	1355.46	22.5756	23.1599	37.4833	117.77	22.2194	29.5648	63.5033	108.418	22.2204	5.70323	125.191	145.432	52.3034	69.4459	490.955	45.0072	126.487
ATG4D|84971	22.203	22.229	52.583	29.4925	28.3022	33.2722	27.8916	42.9325	134.122	70.222	41.2053	91.4769	60.4988	32.2947	25	47.763	38.8316	55.5352	55.2849	185.054	78.2307	72.8766	77.5681	86.6413	31.8206	26.7532	37.2001	86.5998	47.06	74.0456	60.0842	36.974	34.1667	21.511	115.691	58.6834	107.324	118.358	88.4637	21.684	47.376	40.9885	49.0542	33.9954	83.4562	65.3397	23.4291	114.479	80.0329
ATG9B|285973	0.369094	0.910433	1.57874	1.83686	0.885335	0.736713	1.15625	2.99385	19.1511	2.16142	1.54232	17.9065	14.5475	1.61171	1.27805	3.41585	3.29921	0.53248	3.60605	3.85605	1.17618	7.28322	1.9968	3.53962	1.32874	7.98474	2.03002	2.81521	2.57948	1.85778	6.14345	2.52215	3.5123	1.42101	23.7717	2.70546	3.14592	5.73794	2.031	2.79995	1.05094	1.31718	4.18922	0.818898	1.27042	0.839321	0.332185	12.7938	2.73917
ATIC|471	169.35	337.376	476.123	200.421	324.026	292.291	223.507	376.133	619.044	293.173	222.698	783.145	529.735	180.743	268.775	236.259	316.707	313.174	219.757	167.975	212.738	166.933	695.342	527.665	205.128	270.31	179.767	464.347	309.279	473.207	258.197	170.941	285.066	186.168	203.995	171.691	219.716	245.285	260.425	449.994	397.981	375.689	350.164	282.493	157.539	467.57	181.56	612.719	286.046
ATOH8|84913	3.27057	1.54394	4.03217	2.60203	2.11617	1.3604	0.301663	9.16649	6.48305	1.83718	0.646297	1.12157	1.66508	3.50853	0.26992	1.28482	2.81797	0.423235	1.25848	0.464263	2.32131	0.885338	1.49601	2.56748	1.94321	0.927445	6.45303	1.6761	0.50745	0.744979	4.93004	1.23818	0.431872	0.766573	0.723386	7.93781	1.60764	3.70352	3.60656	0.626215	0.960916	1.38825	4.11099	5.39171	1.10689	0.618441	9.10171	0.84323	0.906932
ATOX1|475	46.4759	129.471	218.021	139.246	107.226	102.638	108.186	185.511	62.5797	174.069	175.005	106.595	179.865	110.978	113.205	204.774	305.561	126.68	150.5	71.7617	193.081	212.105	211.316	221.134	108.183	138.561	127.81	263.535	240.165	157.368	317.869	92.6143	317.912	115.035	138.888	118.093	135.605	141.897	111.329	112.495	266.983	173.384	273.995	189.756	169.393	181.366	85.6256	197.931	154.886
ATP13A1|57130	64.187	103.379	138.136	94.3587	83.4415	150.052	87.3104	75.9564	152.68	180.445	69.2326	180.894	116.411	66.5035	58.5334	249.929	129.424	86.9105	103.472	203.142	126.919	181.975	222.982	245.197	104.154	101.65	80.78	147.329	120.757	131.347	190.685	78.1194	129.986	89.8707	535.937	111.585	84.9465	309.84	190.676	86.7864	70.9011	116.371	136.15	97.7422	204.037	121.268	54.1287	294.947	113.382
ATP13A2|23400	62.979	88.6707	452.365	129.651	166.839	132.239	56.3372	137.498	159.141	157.667	108.204	133.335	278.077	84.3492	71.2037	59.0499	111.347	81.7772	162.14	138.116	153.934	136.733	180.568	153.737	97.4524	102.438	95.1227	111.612	110.806	89.9644	372.214	93.1913	111.737	42.3083	92.7082	195.653	74.2686	156.006	225.065	112.884	164.326	221.099	135.811	138.565	130.785	176.193	103.698	416.974	101.149
ATP13A4|84239	21.528	8.25081	12.7733	0.488599	0.618893	230.8	23.6137	0.944625	0.423453	19.0375	1.23779	0.716612	8.1215	0.130293	0.765472	29.0391	0.799023	0.309446	1.17264	0.29316	0.260586	55.1769	2.46221	4.85342	0.228013	1.62866	1.54691	2.38111	8.48371	3.4202	1.28143	7.37785	2.42671	35.9609	0.928339	10.1287	0.749186	0.702606	0.249186	4.16938	0.488599	0.130293	7.37785	5.13029	0.488599	0.407166	7.92671	0.537459	3.2798
ATP13A5|344905	55.0268	17.533	9.98441	0.259776	0.0410172	2.30572	0.983593	0.636861	1.93629	2.11239	0.46787	0.382827	14.6369	0.164069	0.517364	96.2423	1.95379	0.748701	0.498223	0.962538	0.0273448	16.8523	0.0273448	5.61198	0.218759	7.56166	0.78671	0.0782062	0.132622	2.18731	0.0596117	1.11348	3.0566	10.9122	0.437517	6.00164	10.9984	2.48318	0.414274	1.15942	0.259776	0.0273448	3.18895	3.75581	2.55237	0.164069	5.3224	0	1.48947
ATP1A2|477	6.69265	9.30449	5.1874	3.78651	2.82755	2.63888	1.61406	21.9679	2.60547	3.77315	2.16258	2.53134	4.98155	7.33217	2.55966	3.6917	3.89628	5.28985	3.20267	2.77856	3.86955	1.86128	2.67261	9.97391	6.04613	1.99045	5.26567	5.54025	2.049	14.4928	15.9965	4.1559	1.76583	2.22717	2.72192	8.89532	1.22494	2.18231	2.78333	2.87878	6.0929	8.5587	28.6612	4.44225	3.57493	4.98982	17.1196	10.4642	10.07
ATP1A3|478	0.0836353	1.70059	0.559799	1.33008	0.341232	0.226373	1.66072	11.0176	199.831	9.49652	5.19152	0.446055	0.816002	20.6228	0.2799	0.639532	4.6426	0.144132	1.92584	1.18595	0.212434	0.487873	1.9869	2.48815	20.959	1.78422	0.404795	5.91664	0.446055	7.9593	29.99	0.785336	8.18233	0.587957	3.86033	2.10733	2.18846	1.11514	1.07165	0.7109	1.50376	0.635629	2.60524	0.968497	4.15222	0.53666	0.822414	1.22805	0.432116
ATP1B2|482	3.29493	6.57194	6.69433	3.48597	2.87642	4.82925	2.53612	4.9003	15.6012	5.17522	2.30179	2.94388	3.46119	4.45731	3.48478	3.68119	4.09045	1.87224	4.11821	4.33373	4.04299	2.80448	9.56119	9.67045	3.29731	3.00687	4.6991	9.85433	2.19701	4.06716	10.4487	8.01672	2.52746	4.10687	3.76328	5.50955	4.15493	3.16	2.95254	3.4	3.83851	5.10448	9.49672	5.00657	4.65164	5.02209	5.73493	6.0397	3.37343
ATP2A3|489	104.336	330.258	50.4055	53.4399	221.658	84.7668	22.7539	52.6887	85.0042	91.6826	113.549	273.908	39.5825	235.309	35.9222	24.7819	96.5557	26.2832	129.492	80.4694	50.3553	44.2963	482.869	198.74	129.695	26.6887	34.1088	258.658	94.2921	110.854	82.0211	61.9658	277.419	28.5818	30.826	35.2944	7.66554	325.322	26.5715	112.474	197.229	88.458	68.1786	51.8494	152.21	124.693	30.5844	2051.62	178.575
ATP2B2|491	0.0420966	0.105535	0.0368199	0.0996717	0.303471	0.0703565	0.0607411	0.13485	3.57	0.941721	0.0612101	0.0730535	1.54292	1.75879	0.159709	0.291041	0.144934	0.086773	3.09686	3.93809	0.0627345	0.0938086	0.0834897	0.0488977	0.178588	0.100023	0.211069	0.0946295	0.0976782	0.530488	0.194887	0.105535	0.264189	0.0496013	0.094864	0.273569	0.0608583	0.196881	0.051712	0.0117261	0.0424484	0.086773	0.287289	0.214939	22.7097	0.281543	0.0820826	0.0365854	0.024273
ATP2C2|9914	8.32883	32.2971	22.6165	28.6192	4.99118	10.4423	27.5736	41.9703	7.51131	51.7329	31.2004	8.94622	6.84572	98.1458	9.53306	8.27182	7.80517	30.4702	84.7211	1.76315	29.4296	210.63	72.9718	88.7746	23.2939	33.9662	3.77608	36.1704	4.1581	104.905	63.9712	11.4023	51.3147	14.3115	60.4502	19.7011	6.29239	24.1969	6.47517	5.34528	63.0544	22.9509	8.61975	17.6668	59.5439	217.608	17.3285	43.1984	40.0749
ATP6AP1|537	254.246	691.194	1023.79	501.241	758.171	1191.13	370.975	1472.2	593.317	1150.75	529.359	927.101	242.766	589.954	452.614	358.131	561.372	603.725	779.499	321.651	1077.41	617.018	817.449	1601.38	315.928	418	437.116	897.721	740.573	1033.42	1929.14	482.373	370.959	563.973	492.094	641.136	300.074	1096.7	655.433	353.722	1085.67	913.131	700.348	805.021	1044.36	1911.39	354.819	1512.19	943.78
ATP6V0B|533	83.6902	229.485	480.745	326.551	416.727	322.349	238.234	760.893	782.868	1029.06	223.602	428.472	786.947	423.041	315.381	821.66	486.969	372.731	535.5	363.152	699.799	1619.93	623.155	1029	251.033	386.36	361.819	603.227	283.318	687.261	1371.21	361.348	491.271	205.462	307.273	471.207	400.244	914.043	673.598	197.23	860.8	655.552	410.091	468.105	753.176	845.099	221.23	347.905	927.841
ATP6V0C|527	156.197	313.773	722.353	347.575	879.72	565.875	445.625	895.758	295.303	907.906	252.409	499.46	612.419	318.45	633.567	721.121	480.665	726.027	420.597	912.347	849.005	1146.63	499.654	1219.81	253.977	474.047	631.146	974.405	949.768	762.162	1014.73	417.978	570.064	587.591	485.114	560.243	441.393	663.89	357.127	388.893	735.727	495.487	684.244	444.823	634.72	435.713	217.923	660.651	973.484
ATP6V0D2|245972	0.346835	4.17553	0.833755	0.548523	2.773	4.45865	1.65781	12.4219	2.10506	13.0823	3.48523	1.45021	14.3131	1.18608	1.61308	0.761181	2.30886	1.88608	1.4211	2.71814	6.93418	1.98228	3.73418	6.78397	0.619831	5.64726	0.744726	3.23333	2.80549	1.47131	12.4384	0.501266	1.56034	1.20253	1.53671	12.3228	0.732489	1.17468	1.88945	0.839662	2.34557	2.5097	2.32405	2.80717	4.4616	1.41561	1.25359	1.21561	7.21983
ATP6V1G1|9550	187.432	568.965	537.834	330.783	472.065	343.839	296.232	483.445	702.608	357.384	270.484	387.16	396.861	271.391	359.313	332.421	426.685	212.086	825.585	588.173	862.418	398.944	516.256	1444.94	195.636	445.854	326.936	594.155	417.754	773.932	871.727	482.359	579.073	296.916	268.997	503.967	209.498	333.892	465.518	439.068	663.881	556.049	590.761	562.41	530.505	987.693	389.612	795.631	532.85
ATP8B1|5205	26.4233	65.3271	130.272	72.3647	65.2437	136.88	45.9184	91.6404	56.2888	154.304	191.718	21.1853	51.8719	453.028	57.3876	13.6836	19.2219	53.1117	32.6373	7.46837	67.0003	83.7344	156.966	118.537	41.0222	21.8907	27.96	122.755	64.043	81.8603	66.2733	87.0885	135.179	72.9338	54.8671	34.7982	8.87006	120.147	52.7147	130.636	78.4539	308.538	58.3804	106.283	83.2509	248.528	75.9794	102.47	115.411
ATP8B4|79895	3.08087	4.58393	3.02774	1.30584	2.19741	5.51963	2.60267	3.39517	1.44092	5.26837	2.09888	0.837536	1.58682	2.31448	2.46091	2.11689	5.29863	0.729467	2.31646	0.540346	1.81178	0.810519	3.00793	5.42903	4.42093	2.75018	1.35987	6.70029	3.31052	1.80115	2.30584	4.60195	0.844561	1.08069	0.588437	4.09042	1.26081	0.108069	2.29647	1.4139	2.14247	4.45029	10.179	5.47622	1.9366	16.0041	5.09726	5.90778	1.69218
ATPIF1|93974	179.739	196.229	583.304	212.955	570.734	208.476	410.655	562.341	416.487	436.638	298.534	470.631	563.912	472.482	449.478	1085.64	459.114	260.143	537.899	517.502	848.885	654.987	1426.42	1300.86	332.692	423.098	652.397	1657.62	355.506	241.324	568.851	472.609	239.683	237.957	259.574	565.768	361.883	1272.11	368.657	415.401	670.612	687.683	444.204	585.78	709.131	1021.74	335.92	655.978	749.38
AURKA|6790	8.21833	34.726	57.9483	17.5238	17.7264	20.0018	53.6024	142.251	174.646	52.3459	99.1959	204.17	100.966	57.0876	12.8032	83.133	85.761	72.7942	161.657	67.2237	40.611	33.9178	84.9798	92.6217	102.873	172.581	6.91734	34.3989	26.2336	116.813	68.5063	11.7026	174.048	52.0049	38.0849	12.3351	221.825	39.2601	235.773	12.1285	108.961	26.8949	25.8747	22.0377	76.1748	67.7188	9.16217	51.0948	53.155
AURKB|9212	9.72859	10.4604	28.3037	14.038	11.9952	10.0969	30.1292	39.3336	214.505	48.6624	36.2682	274.086	131.718	6.59774	18.336	112.98	114.532	46.3708	133.395	112.879	40.1777	27.4233	118.926	50.0428	46.4459	173.295	5.97738	43.7278	19.4225	86.5202	25.4168	2.54443	57.6333	37.399	62.4588	9.65267	253.804	59.0428	252.191	3.51373	93.0493	17.8619	12.8029	14.273	134.464	42.1963	4.03877	42.5121	48.7076
AVPR1A|552	0.433317	1.6129	4.64083	0.746269	1.09437	2.49037	1.48339	5.91069	2.76264	4.94463	1.45378	1.91382	2.04622	1.62783	1.14035	0.456909	0.517573	1.18416	1.03587	0.120366	1.38734	1.69716	0.648532	2.22629	2.77997	1.383	2.09966	0.337025	0.192585	3.22412	5.15046	0.864468	0.56572	1.92561	0.0842561	2.92826	0.156476	1.92248	0.897689	0.997593	2.8274	1.91382	4.83775	2.98291	3.11844	1.54068	6.46846	1.14348	2.46895
AVPR2|554	0.624257	2.37812	4.26397	3.88763	1.04043	2.34245	0.871581	6.93639	1.71522	1.09988	0.891795	1.54578	1.24851	1.15755	1.16647	1.25743	2.84007	0.326992	1.17955	0.904875	2.41974	1.63496	2.07729	3.59453	1.27824	0.953032	4.98514	1.59156	1.39715	3.32045	4.64566	3.43103	0.891795	0.505351	1.48633	6.14269	0.208086	0.743163	1.53746	0.224138	3.3258	1.73187	4.80321	6.43876	1.97087	1.04043	2.21879	1.46254	2.28894
AXIN1|8312	42.7213	42.2007	97.9045	37.4812	83.7181	70.8443	54.2933	60.2924	89.9176	78.586	39.4753	92.2848	119.634	22.6506	75.9334	46.6202	55.9167	58.9775	138.799	32.6307	116.891	42.1227	59.7271	75.021	33.799	92.6526	66.8309	135.838	62.5226	49.0628	90.9722	51.9611	67.1826	59.664	61.6334	57.8887	61.1715	71.3815	114.348	84.4178	66.9351	67.7698	74.5273	56.6386	56.9018	48.0599	26.3935	98.0491	131.074
B3GALNT1|8706	34.3981	53.0275	48.7516	22.0546	49.8198	53.0417	67.125	88.9445	125.572	90.757	33.8047	207.131	56.2581	43.0356	34.0078	25.8871	42.1917	90.9116	32.9408	63.0667	34.5207	31.9858	42.4845	38.8415	68.4724	36.0637	25.2867	28.7211	27.5023	71.4386	84.4168	30.9411	17.2605	28.8907	8.1633	31.8835	29.9653	20.7151	82.8286	31.0226	59.9629	57.1844	67.7449	66.0598	33.9149	225.538	38.8213	127.736	185.539
B3GALT1|8708	0.599631	0.415129	1.51845	0.230627	0.184502	0.553506	0	0.230166	0.461255	0.184502	0.0922509	0.392066	0.161439	0	0	0	0.0922509	0.230627	4.35378	0	0.0461255	0.0461255	0	0.207565	0.115314	0.276753	0.25369	0.00553506	0.0691882	0	0.230627	0.184502	0.184502	0	0.345941	0.374539	0	0.0691882	0.0419742	0.0502768	0.0461255	0.0747232	0.138376	0.853321	0.50738	0.13976	2.38792	0.0461255	0.0691882
B3GALT2|8707	1.36697	0.50451	0.787486	0.422773	0.11274	0.324126	0.1677	0.366404	0.0281849	0.126832	0.408681	0.338219	0.704622	0.493236	0.338219	0.334837	0.397689	0	0.169109	0.197294	0.364713	0.169109	0.648253	0.465051	0.225479	0.331172	0.169109	0.309188	0.225479	0.140924	0.239572	0.535513	0.0845547	0.310034	0.319617	0.281849	0.0281849	0.0281849	0.11274	0.239572	0.140924	0.0563698	0.521421	0.295941	0.520293	0.338219	0.408681	0.394589	0.169109
B3GAT1|27087	1.30164	0.441143	1.16865	0.466893	0.226372	0.311262	0.339559	0.537634	84.5127	0.0848896	0.4103	0.368138	0.76429	0.127334	1.74392	2.14969	1.87153	0.291171	0.364177	0.73571	0.0282965	0.8206	0.277306	0.653933	1.34069	0.907187	0.863045	0.116865	0.161573	0.0602716	0.382003	1.04697	0.128183	0.396152	0.393039	1.69779	0.509338	6.46604	0.488681	0.297114	0.113186	0.187889	1.10357	0.105546	1.20911	0.0967742	1.75439	0.173175	0.0424448
B3GNT3|10331	27.5736	3.80795	9.78477	0.680648	13.7785	1.40324	12.7546	2.93046	0.827815	17.5173	20.6714	32.2848	0.653422	3.84474	0.754231	231.787	5.45107	0.586829	9.93929	26.4956	0.62546	204.869	40.6082	12.8734	2.17366	1.69978	1.65563	3.71818	0.772627	3.91832	0.855408	22.11	31.4937	0.759014	23.1199	9.27741	37.4595	0.207138	2.77373	13.7104	0.62546	0.318249	1.56365	9.21192	1.46652	1.66483	2.6674	0.362031	3.81972
B3GNT4|79369	0.724948	0.725639	0.760194	0.172771	0.760194	0.50311	1.6434	0.621977	6.07464	1.36697	0.794748	14.6144	6.35798	0.103663	0.286109	1.96959	2.17208	0.286109	1.41672	2.45335	0.345543	3.48998	0.908086	5.50173	0.760194	4.06012	1.5895	0.393227	2.6358	3.76641	0.913614	0.794748	1.35729	1.07118	4.64616	0.541811	2.10781	1.52039	2.42294	0.48376	0.276434	0.485833	0.838977	0.85349	0.420871	0.320663	0.552868	0.967519	2.20387
B3GNT5|84002	42.0961	7.32026	6.68966	1.95957	3.55822	10.0087	3.72791	5.76906	61.268	8.42	6.34713	396.992	49.5565	3.38901	4.0426	64.2053	24.7967	1.92641	83.6952	60.9792	4.36819	33.1116	3.75212	16.7323	9.16001	49.5965	4.61051	11.1777	2.92786	17.6693	6.20794	11.2297	2.23917	31.8845	4.09296	10.7819	41.785	3.46042	72.1908	2.3953	3.48511	7.19438	15.4733	12.7802	10.8189	6.81312	15.2602	8.47398	23.1046
B4GALNT3|283358	32.4899	39.2736	10.7618	4.50689	36.3768	6.09332	0.870272	51.8476	224.039	96.4624	4.67798	8.28031	218.88	0.406504	17.9696	0.350654	8.51361	40.6554	109.026	4.96253	26.28	20.1241	11.3015	40.0661	13.0166	14.0809	21.9297	62.941	13.5829	3.51714	69.7699	12.5468	18.6253	10.1566	19.0435	50.1548	26.5688	5.16578	60.1474	31.3128	26.8349	65.8501	41.2047	43.2033	3.84129	229.185	20.4203	134.132	4.96501
B4GALNT4|338707	26.9362	37.8262	85.7548	31.7251	17.3145	18.2252	19.4638	30.8548	141.183	64.9472	23.8845	40.1308	76.5977	16.0211	30.5279	7.82847	23.2325	24.9134	32.8949	26.754	70.4796	41.0165	15.5845	32.2004	20.7135	40.0121	30.689	72.3072	22.1941	49.5368	36.7286	36.4412	65.1533	16.7496	59.4164	15.6289	45.4049	39.6385	20.8109	47.2969	60.5175	15.3318	8.4294	39.9685	28.1403	45.6211	8.91915	25.0875	39.2518
B4GALT3|8703	88.1094	202.539	327.024	150.718	87.6451	185.603	253.988	143.528	159.628	331.64	163.184	326.623	221.411	205.34	93.0502	117.395	610.917	132.858	548.246	351.904	159.869	139.703	881.47	297.773	94.2304	472.747	86.2733	351.966	167.372	261.804	133.402	290.8	284.383	381.726	240.296	171.1	155.727	232.089	321.651	324.899	144.157	395.099	260.2	259.36	246.351	143.074	93.8573	341.666	76.8174
B4GALT6|9331	8.03727	2.76831	2.89502	1.72487	0.990204	6.29152	2.11882	12.3529	11.0402	4.6529	4.30345	16.9187	7.80473	1.45869	1.85264	1.86606	2.94932	5.24127	11.4355	10.1512	2.32112	1.20315	1.65268	4.65183	2.14012	1.13096	2.43612	1.31537	1.68228	10.5941	6.36712	2.01235	0.638842	1.14991	1.75681	4.47828	2.89608	0.425894	11.2404	1.83135	5.92951	3.38586	4.53471	6.09029	1.95124	5.50916	4.17376	18.174	8.44336
BAALC|79870	0.700949	36.6486	4.68159	1.17647	3.12827	2.45427	0.818975	4.89108	63.2091	3.28046	3.44896	1.48615	5.34573	2.17989	2.46679	1.40417	1.88729	1.17647	33.9894	0.85389	2.85123	3.43454	2.2797	10.0945	2.29981	2.08729	4.61101	1.88121	2.48349	34.6918	1.92144	1.59886	2.6945	12.0281	22.5533	10.8083	0.531309	160.765	4.98216	0.341556	2.12524	1.75066	5.30854	6.0778	11.3446	1.84896	5.14231	21.5693	8.9351
BACH2|60468	12.0132	3.37277	9.48104	1.6311	3.4336	10.8773	3.5256	2.82539	4.54694	3.89915	3.3396	3.45604	7.55369	0.642928	2.32777	2.45438	4.55701	0.909654	19.0497	0.796196	3.54351	3.54904	1.8412	2.68163	8.74599	3.45549	3.7095	1.04501	1.17771	1.21851	1.30289	2.88068	0.702201	1.28829	1.56972	8.12651	1.63663	2.17417	5.73814	1.39279	0.646909	1.54705	8.56862	6.98054	3.84507	1.40672	6.69181	0.75329	1.92569
BAI2|576	3.05734	37.0696	80.2121	31.1375	29.2341	47.9763	23.6943	12.641	249.095	132.89	12.2744	21.1317	53.9962	63.0939	33.2101	1.89321	4.8818	13.0313	24.6685	7.07285	45.7267	41.7642	3.20948	18.9286	33.5614	1.19017	136.297	272.596	39.8841	18.2545	185.715	19.3666	36.1913	5.13458	3.85372	12.2513	1.84582	7.10152	2.14716	60.263	86.2902	69.7285	12.6118	66.9819	8.54593	29.8569	11.3078	32.3154	30.3947
BAI3|577	2.03549	0.428776	0.525965	0.345403	0.311339	0.917818	0.0714626	0.393044	6.21606	0.38304	0.166746	0.708671	1.85469	0.119104	0.333492	0.219152	0.0714626	0.136017	0.119104	0	0.190567	0	0.250119	0.19819	0.183182	0.119104	0.309671	0.381134	0.0952835	0.226298	0.263221	0.54788	0.0476417	0	0.230586	0.433063	0	0.0238209	0.190567	0	0.0952835	0.445212	0.726536	0.26203	0.171987	0.287041	2.83468	0.0245355	0.166746
BAIAP2L1|55971	35.8976	67.9462	114.021	30.0929	8.10483	51.5318	56.6828	34.629	142.93	138.109	59.6939	96.9571	90.5307	81.4022	20.6285	103.263	37.2159	28.3126	106.433	72.9957	61.3384	71.2781	101.332	31.1233	27.7567	53.0674	27.7477	51.679	40.541	220.669	49.7292	60.7219	54.9804	28.8666	94.8911	40.0907	66.0497	122.427	163.862	45.223	14.8055	67.2922	43.5665	45.3373	34.8506	91.7757	31.6029	19.0739	17.8156
BAIAP2|10458	45.8652	69.2238	89.3736	83.5976	114.51	99.5876	31.9987	110.348	37.2457	357.857	56.0407	47.0614	91.7828	171.83	76.9101	53.6211	35.1752	151.551	97.696	32.9207	107.783	55.4513	139.836	172.661	31.5635	39.6879	66.9129	120.582	94.7596	335.815	150.13	41.3616	127.105	46.8474	144.46	95.1598	34.5964	141.629	57.3789	61.7518	140.103	86.8101	89.5296	101.653	124.065	170.136	53.0539	186.681	166.543
BAK1|578	25.6223	181.704	76.2645	33.1948	39.0563	64.102	68.1717	51.3296	76.8906	86.7682	31.958	155.997	113.668	42.6362	33.7027	99.0295	123.426	78.265	143.372	101.313	88.7909	91.0203	164.266	89.0194	68.8994	121.642	47.4801	55.391	55.6445	167.646	49.9751	41.1357	131.14	59.2521	48.8038	75.2959	110.066	92.5217	180.371	44.8523	58.4769	65.5065	94.9801	47.2027	111.104	83.1325	33.7918	69.9058	68.6445
BAMBI|25805	81.8937	103.144	876.137	452.285	257.232	119.117	285.045	175.299	38.3471	43.8242	56.5625	269.556	147.7	12.9427	295.39	161.759	325.008	33.1267	88.3769	232.082	279.953	196.094	73.2375	944.904	111.826	266.132	72.5581	13.6452	11.3223	367.192	159.92	146.966	1053.88	43.3686	343.29	84.4755	38.0441	6.58402	130.313	74.2369	84.8904	164.992	468.083	803.171	217.9	63.184	183.398	249.945	502.896
BANF1|8815	255.221	547.128	693.878	401.626	496.843	588.747	444.663	386.702	979.907	596.79	555.178	748.324	1007.7	249.756	525.155	2148.9	1024.43	401.939	1157.53	999.432	1251.93	540.165	893.28	1262.13	645.263	572.571	627.78	1386.68	764.85	786.522	729.438	432.816	723.857	473.65	900.936	635.571	938.536	1125.05	1257.34	419.263	712.205	577.785	599.286	982.69	808.153	808.468	232.854	410.44	574.603
BANK1|55024	0.209581	1.94611	1.00389	2.00599	16.1946	2.02096	1.55689	3.47305	0.374251	3.11647	0.853293	0.664072	1.42335	0.823353	4.94012	10.4129	22.5365	0.0311377	4.42964	0.0299401	1.26228	0.11976	14.7904	1.9485	37.6494	2.61976	0.613772	0.780838	1.33533	0.718563	3.22156	2.96497	0.329341	0.553892	0.284431	2.97904	0.525449	0.269461	7.59102	5.28443	0.658683	0.676946	15.2096	3.37275	22.3979	1.6003	1.87126	1.16766	1.87126
BARD1|580	8.57086	11.5238	48.1318	7.89786	8.30602	17.7356	33.5507	20.6342	81.2264	13.9153	21.2134	90.6101	28.2019	10.6378	7.65875	3.10095	6.68844	26.9723	27.8496	1.40538	7.48219	6.2015	12.0942	8.4323	14.6936	21.6944	2.84956	5.42359	6.17577	15.0831	18.2969	7.23951	10.825	7.46239	1.66271	4.66548	3.56295	8.4323	12.4854	18.422	26.0455	40.6287	11.54	10.964	18.0483	31.2538	10.7482	35.053	14.4295
BASP1|10409	94.2115	361.795	96.3538	27.8665	43.456	210.738	76.8027	270.219	708.865	112.132	83.4511	21.9835	389.793	171.06	71.1412	52.4989	216.36	80.3973	87.1225	54.8038	156.87	109.137	107.434	71.789	156.927	53.1308	86.0835	678.506	79.4511	103.027	106.994	62.6313	169.766	84.6742	36.4824	151.298	25.2247	38.0984	83.2549	23.5253	356.631	96.0407	177.91	107.077	198.092	181.893	59.1121	726.246	95.5319
BATF|10538	0.209864	51.4344	54.5771	23.6758	26.9307	100.427	38.2917	181.244	1.64113	126.28	21.9643	5.63379	30.4648	38.9643	41.6789	65.0651	116.995	85.0042	46.9066	13.9433	93.3494	48.1763	171.906	118.723	43.3547	62.341	67.6443	181.618	116.326	86.1217	74.0157	76.2067	31.7891	44.2434	27.4355	23.5708	14.3851	14.3998	28.873	77.9874	71.3075	76.9874	195.38	147.519	110.41	80.3221	64.6275	84.7471	92.7817
BAX|581	91.2642	124.585	236.793	108.335	165.547	172.767	147.771	197.773	229.159	230.409	128.081	228.493	352.435	55.2073	122.21	350.511	470.005	91.4265	320.847	280.195	251.113	148.945	308.325	603.55	110.13	368.922	167.102	374.437	183.75	222.211	190.393	148.637	165.14	147.133	337.076	198.957	221.018	197.594	623.057	86.3626	162.773	205.673	211.043	254.583	313.249	171.896	82.2275	260.764	223.986
BBC3|27113	9.24495	22.2057	36.2497	23.038	23.8627	37.4257	32.6659	30.3644	38.5939	88.1451	27.5529	12.6183	23.2979	14.0012	31.5428	9.25386	30.3864	24.9584	21.113	19.4679	37.1034	20.8383	42.0999	26.8942	10.7556	19.56	37.5666	50.431	55.7485	34.8115	41.2545	40.2188	15.1998	26.5161	35.2342	17.1088	18.9614	14.3942	29.0553	20.3627	17.6837	22.9043	27.1243	34.1706	44.4608	11.1397	10.1617	26.7824	58.1558
BBOX1|8424	5.17621	11.3684	31.8959	6.55286	1.59692	11.2583	3.55176	7.87445	1.73458	7.10352	2.12004	2.69824	86.9642	1.54185	1.37665	73.2847	27.9174	2.03744	103.736	1.76211	0.468062	63.88	1.40419	2.72577	6.0022	2.53304	12.7858	0.555066	0.0550661	1.7043	0.33315	26.9824	0.881057	0.550661	4.17952	26.7346	7.34526	0.110132	138.247	2.31278	4.51542	1.21145	3.05341	38.4334	3.00936	0.743392	44.5341	0.110132	0.27533
BCAS1|8537	3.40731	199.85	36.6335	27.0052	24.768	77.3717	24.1054	16.6061	4.4047	175.043	205.16	4.38577	4.43081	413.175	29.6994	12.2285	6.75522	51.9664	4.40209	3.3453	69.5738	165.295	1029.94	192.389	40.1012	5.91416	8.50131	37.9732	55.0751	173.903	302.38	7.22356	21.5193	15.5516	17.9478	57.5555	1.41971	22.3916	3.76077	16.2043	156.674	45.1779	60.6384	60.3153	16.6648	497.571	23.968	72.9628	267.93
BCAS4|55653	22.0058	140.635	158.928	90.6387	95.1877	142.112	70.8663	262.061	61.3081	243.173	402.061	62.1047	99.3804	103.933	78.941	130.897	145.982	138.773	81.7043	76.6628	136.608	201.213	498.933	188.655	182.62	84.4003	94.7375	198.176	172.566	149.817	239.495	187.824	366.395	55.0698	91.9352	164.63	65.7724	36.059	182.046	112.714	231.141	162.341	207.906	212.959	142.263	230.188	71.6188	394.5	284.773
BCHE|590	8.3071	1.66864	3.43195	0.414201	2.72189	5.38462	1.86391	6.36095	0.177515	3.01775	2.60355	62.6769	1.2432	0.266272	2.34142	15.5746	0.352663	0.946746	0.118343	0.532544	2.30473	1.06509	0.0591716	0.650888	1.42012	1.71893	2.01183	0.656213	1.92308	21.742	1343.66	7.81065	0.118343	0.769231	0.35503	3.12544	0	0.739645	1.06509	1.50888	1.39053	1.45858	2.07633	3.79408	1.2426	1.48876	4.40473	78.1373	4.46746
BCL11A|53335	60.0937	4.13109	10.6005	2.86288	2.82697	4.6994	0.680814	3.69563	69.27	0.75339	1.01959	100.202	57.1145	0.602712	1.67002	58.5972	33.3727	0.867152	107.343	146.732	0.490708	0.778503	2.82094	1.93571	11.0163	24.8857	4.29432	0.602712	0.238574	1.68458	0.818684	4.5329	1.54445	0.615269	29.9701	9.65922	28.2898	0.0878955	15.5527	3.39026	0.678051	1.01758	5.41713	8.12004	10.1683	0.617027	7.04495	0.367152	1.57685
BCL2A1|597	0.647249	11.4347	2.91262	6.68824	7.22006	5.07012	9.76268	5.87918	6.09493	7.33549	9.38511	6.95793	139.799	3.34412	6.95793	44.9299	103.824	5.44768	216.174	28.425	9.27724	7.87487	47.3549	25.5124	42.2837	43.6591	5.12298	12.9989	2.75081	8.00863	7.17368	22.2222	12.4595	10.6796	3.0205	10.4639	21.3592	5.39374	82.8026	5.93312	2.1575	6.04099	40.3991	18.932	72.4347	10.6257	8.46818	9.60086	9.43905
BCL2L12|83596	18.1977	15.7505	46.1353	33.4276	27.352	31.8568	29.4197	42.3541	25.6047	33.9852	24.0751	61.2854	81.5782	43.0735	22.6216	105.697	102.395	29.6723	71.1781	45.6395	46.0222	79.0814	41.1718	55.7484	21.9873	71.4857	32.8134	44.6749	44.3726	32.3541	44.7511	23.7019	58.1279	23.6041	50.6226	31.9942	47.8594	35.6406	248.756	21.1945	27.0856	38.7289	34.9091	29.8446	64.4619	36.2024	15.8726	26.6089	54.334
BCL3|602	12.9383	156.025	159.438	68.3927	36.3444	122.323	105.921	97.3326	34.4689	230.42	109.62	104.455	122.281	432.691	107.994	534.178	329.851	140.155	86.0628	112.819	290.196	232.497	304.185	227.482	81.7795	150.362	139.554	484.946	363.153	79.6137	168.462	240.635	137.963	75.7382	268.374	128.617	158.53	92.066	141.783	95.0123	79.1776	88.2398	271.09	187.279	200.174	261.522	72.3766	151.302	373.237
BCL6|604	33.0569	92.3401	71.5083	25.9546	100.339	62.9078	60.4247	153.369	21.155	91.3544	39.7967	31.6905	62.8066	30.0698	47.1074	57.0174	52.9145	39.9728	70.6271	17.9282	60.1918	57.7143	45.386	76.7625	50.8909	82.351	67.2091	71.3619	76.2515	27.289	169.06	79.0945	28.5711	25.3445	104.629	99.6165	33.7118	39.4312	58.095	39.7987	12.628	74.714	97.016	131.293	49.2377	123.496	96.5223	984.379	60.2453
BCL9|607	29.6523	86.9297	108.968	58.177	31.9212	73.1713	56.8558	24.9515	69.245	79.5055	80.0707	98.8596	51.2863	36.7874	39.0826	30.0898	57.3407	56.5801	27.9388	15.9945	49.5527	34.4862	88.8698	73.9513	18.8388	48.5815	29.5049	142.6	64.6053	82.7086	116.741	71.3215	56.1203	76.5631	64.6084	34.9847	6.75426	45.7234	33.9644	152.54	54.1836	133.137	90.3543	52.8691	33.6946	39.622	33.3403	152.212	37.3276
BDNF|627	0.426295	0.126743	0.622759	0.371016	3.15339	0.302042	0.214143	4.90886	0.828436	0.362052	4.34985	0.0249004	1.27615	0.161853	0.696713	0.19995	2.12176	1.57744	0.187998	0.224104	0.798307	0.255229	0.132968	0.448954	0.211653	0.224602	0.224104	0.343625	0.136952	0.298805	8.93625	4.49452	0.262699	0.0373506	0.967878	0.443725	0.0996016	0.064492	0.0288845	1.13172	1.34512	0.37002	0.61006	17.3045	0.328436	1.52938	0.311255	0.323705	2.06673
BEGAIN|57596	7.91128	1.33087	3.47283	1.18299	0.554529	1.81405	0.524214	1.6451	7.26211	12.5508	0.757856	2.83549	1.79519	1.51571	1.0536	0.29464	0.676525	0.222921	2.88318	29.7575	0.626248	1.70055	0.134566	0.570795	1.7793	0.110906	2.31054	4.70499	0.554529	0.38817	0.580407	1.34935	0.573013	0.425139	0.998152	1.93309	3.01294	0.299076	0.316081	7.8536	0.665434	0.498336	2.25508	1.08466	2.94196	6.92126	3.19778	0.573013	0.480591
BEND5|79656	21.8967	6.72727	18.6138	8.98182	3.01818	11.3411	9.33164	9.92364	52.08	11.1273	2.94545	78.0255	10.3236	2.8	7.09091	5.99491	7.27273	2.728	7.22982	21.9236	13.3025	12.736	7.27055	4.02109	5.00655	1.15273	9.344	27.0873	10.0211	2.20727	10.5702	13.7084	1.92727	1.38182	9.6	16.4364	0.436364	50.6204	2.33673	5.70182	2.44	21.0945	8.376	14.5135	11.1636	7.69164	18.5229	13.2778	1.92727
BEND7|222389	62.2304	53.4428	25.5596	42.2193	23.3426	31.5028	5.61681	81.3061	79.3495	19.6034	21.6741	45.8813	29.4958	4.59926	56.8144	29.6339	11.1741	72.2673	45.0203	59.2188	43.4949	18.7415	27.5097	83.0577	8.84118	8.52909	16.1884	9.91874	35.9663	5.76362	41.9201	17.7608	39.397	7.89797	40.5212	26.8573	37.4404	6.98846	10.4723	6.99446	7.57341	7.21376	68.3961	21.7378	60.5328	22.2392	38.3523	7.96445	83.8818
BEYLA|497634	0.106544	0.255814	0.985398	0.22066	1.00324	0.315846	0.327745	0.0270416	0.521363	0.612764	0.371552	1.89075	0.745268	0.207139	0.353164	0.0530016	0.05192	0.215792	0.0513791	0	0	0.342888	1.40887	0.296376	0.275825	0.455381	0.319632	0.783126	0.47431	0.815035	0.543537	0.234721	0.48675	0.98702	1.09681	0.16225	0.200108	0.335857	0.241752	0.5192	0.161168	1.0027	0.505138	1.05571	0.0546241	0.693889	0.169281	0.0540833	0.293131
BFSP2|8419	0	0.0608273	0.842457	0.566302	0.121655	0.174574	0.653893	1.03406	0.0608273	0.243309	0.0608273	0.243309	0.808394	0.0304136	0.823601	0.671533	3.85401	0.939173	0.68309	0.395377	0.770073	0.182482	0.930657	0.515815	1.40024	0.273723	0.364964	0.0608273	0.243309	0.0608273	15.7257	0.801703	1.42944	1.08333	0.208029	0.456204	0.0912409	0.605231	0.516423	0.290754	0.364964	0.344891	1.60706	0.986618	1.97384	0.00182482	0.304136	0.616788	1.42944
BGN|633	368.29	1750.49	2457.3	993.505	1480.95	7405.91	2544.39	1937.51	922.123	5221.48	1672.91	464.817	1264.56	423.996	1696.36	3652.39	9616.9	1213.39	2496.23	1766.49	3801.64	3137.82	1720.98	1373.65	1255.6	1559.36	4756.18	1275.73	3066.01	621.606	2106.2	1664.08	530.341	1664.86	731.741	5923.44	1678.47	1558.81	4425.93	819.029	793.572	1943.77	4714.58	3756.05	784.848	766.611	655.993	347.551	1129.55
BHLHA15|168620	3.03047	10.3102	2.97784	3.13989	0.34626	4.22438	1.52355	6.44044	1.31579	20.4266	1.45429	5.26316	3.45568	14.2576	0.138504	0.231302	2.50831	1.759	2.23269	0.415512	0.277008	0.554017	0.638504	1.3338	3.79224	1.95983	0.761773	1.24654	1.7313	0.761773	0.34626	2.83934	0.692521	0	1.7313	2.49307	1.66205	0.623269	2.07756	1.38504	1.7313	7.13435	2.77008	0.501385	5.22022	5.95568	2.97784	13.7119	1.30748
BHLHE41|79365	43.0877	69.4152	186.369	200.422	29.2935	133.265	52.9884	46.5018	151.282	62.4465	41.142	7.33562	212.36	10.015	51.8762	12.4144	122.646	19.2044	21.8058	57.9099	368.609	61.9571	20.7163	37.8828	51.3235	37.0919	46.2115	29.6889	17.1607	18.6386	20.215	87.7152	12.524	18.6341	116.867	110.214	32.7974	110.741	62.7189	18.1299	15.7158	50.2389	95.1201	267.242	83.1762	25.8043	147.172	112.021	26.3683
BHMT2|23743	3.04414	13.0331	15.9606	6.28744	8.16868	29.3615	15.7599	22.7467	6.03311	8.06621	6.95796	6.4104	4.51393	3.33316	11.0184	9.18392	6.01104	6.4598	6.77719	9.08828	14.7409	13.8923	6.04467	18.2023	6.20074	6.56647	14.0179	8.32738	4.33053	6.61692	15.5223	10.6411	7.26274	6.64267	18.0147	26.4645	2.10194	5.95849	7.00893	4.78035	6.3815	9.8082	30.8056	16.949	6.24961	8.77509	10.6122	5.2722	11.8996
BHMT|635	0.283582	1.54873	0.617647	0.145303	0	1.08341	0.153644	0.201054	0.35338	0.122037	0.16374	0.118086	0.175593	0.0781387	0.24144	0.153644	0.048727	0.0877963	0.0219491	3.0856	0.356892	0.307287	0.0219491	0.131694	0.175593	0.0219491	0.351185	0.0658472	0.0877963	0.285338	0.517559	0.329236	0.0438982	0	0.92669	0.877963	0	0.147498	0	0.329236	0.0877963	0.0658472	0.24144	0.179982	0.0877963	0.261194	0.592625	0.0921861	0.0816506
BICC1|80114	68.7737	20.6594	37.4907	8.98621	16.835	100.539	41.1594	28.8998	11.9826	37.7356	24.44	9.94647	13.7482	5.17153	14.543	2.34509	17.8183	8.37348	6.2056	1.88564	10.1265	12.6322	2.93309	5.62976	25.7636	10.6448	8.28467	1.65126	9.99878	7.88727	10.6188	20.1857	3.0073	20.189	0.932685	34.8021	9.36456	3.85604	22.7972	8.75912	3.85848	18.6383	22.2303	29.6959	9.92255	9.89132	26.2263	2.4339	6.00852
BIK|638	5.67913	30.6417	110.432	72.5556	33.2409	27.9927	50.3531	36.136	197.229	40.1184	43.6584	89.0696	459.991	30.4133	70.9553	83.4486	17.2492	21.7456	30.7975	29.6272	111.092	80.729	84.055	99.298	26.4829	4.81931	29.0031	147.557	68.2471	96.8868	39.7404	39.8868	120.687	109.719	296.329	32.3167	2.68328	261.07	4.62098	82.5556	83.8484	64.731	27.595	76.891	109.977	24.296	32.9408	44.649	64.5514
BIN1|274	12.0482	16.0464	24.7678	21.7451	13.198	41.4363	21.7543	32.2773	48.1603	38.975	15.1752	3.31099	56.346	7.03767	15.3745	22.5935	112.307	32.0022	120.4	33.1117	15.696	26.0447	29.2781	78.5155	39.332	23.4205	20.4542	38.915	29.8471	12.1989	43.604	34.9058	85.8011	21.2646	10.5401	44.6163	558.597	14.3736	67.0491	9.24223	72.3272	12.8165	63.4818	32.8011	40.3627	9.42707	31.1253	41.0828	10.2554
BIRC5|332	47.3829	89.2562	226.982	50.9642	55.7163	126.091	172.723	270.11	663.81	406.054	87.719	1413.02	877.526	82.2906	53.6501	768.18	576.687	548.614	887.634	738.135	246.985	174.039	293.147	346.967	186.043	576.595	18.5234	170.477	73.5661	334.61	227.135	5.85399	791.132	205.014	295.579	102.204	586.398	213.369	1197.47	16.3223	486.832	117.017	71.6942	109.905	689.853	276.067	39.5317	138.065	230.11
BLM|641	6.15196	9.23326	15.2044	15.8083	3.76697	4.20254	4.91663	9.306	72.3199	10.5543	13.8111	184.338	27.1557	6.51824	3.42956	14.34	16.6848	14.6591	48.2035	10.1617	10.3695	3.82702	20.3894	12.47	10.0099	19.6587	1.16628	5.76282	3.12471	8.10393	10.645	1.87067	13.5005	8.86605	5.94688	2.806	27.5866	17.9656	39.7092	4.65358	19.4099	6.90531	4.95381	3.51386	16.6132	15.1702	3.19746	8.18707	9.46882
BLNK|29760	22.5264	89.9782	44.5507	52.5948	48.7054	81.6029	43.3188	12.0336	41.6998	58.5308	35.4723	14.0205	24.6774	9.57116	83.0298	83.1927	85.5333	24.5848	43.7756	29.2728	85.4817	30.4475	121.518	115.902	42.2312	42.4027	80.711	133.346	21.936	52.5699	42.0727	102.961	67.9397	27.7129	20.0093	63.3599	8.00808	73.8825	48.4034	53.4773	25.4817	17.2045	82.4009	54.7421	92.3431	57.4649	37.4456	100.769	62.514
BMF|90427	5.92046	43.4097	47.0009	13.8269	16.9082	27.9135	18.9884	31.6086	312.417	28.5612	63.2987	101.013	55.5612	19.1673	18.3266	39.7004	56.1915	24.9761	115.825	22.2498	38.9138	16.9895	26.4417	28.1539	35.9712	21.9415	22.0118	36.3438	21.0773	25.5498	39.9915	26.294	36.5996	12.9468	46.7324	41.1727	7.29223	76.5918	48.378	15.7071	9.89723	15.1452	32.7433	53.2969	25.3295	28.4538	16.6461	40.662	27.9937
BMP2|650	10.987	2.73016	2.46698	1.30159	0.626349	2.47778	1.12698	9.14095	7.95556	5.87937	0.968254	1.83746	73.1305	0.946984	1.97873	2.74032	1.76127	0.349206	4.4254	1.61905	0.976508	1.15873	1.32032	1.70857	2.64222	9.95111	1.38095	0.621905	0.943492	1.9327	1.8546	2.61683	0.931111	0.777778	2.76381	3.03079	1.06032	0.650794	19.6737	0.285714	0.666667	1.17048	3.23746	2.85238	1.96825	0.856508	8.33937	0.349206	2.01587
BMP3|651	1.37077	0.287757	0.431636	0.263341	0.292466	0.529125	0.239798	0.326648	0.596617	0.559993	0.201256	0.55354	0.321765	0.352633	0.322637	0.410882	0.839728	0.398675	0.551273	0.465644	0.523718	1.71957	0.579526	1.3835	0.361179	0.459016	0.296477	0.902686	0.397628	0.93181	0.664632	0.617544	0.396233	0.186781	10.8519	0.53924	0.174398	0.610569	0.44489	0.774154	0.278689	0.50279	0.80136	0.481339	0.745727	0.659749	3.29316	0.312347	1.1812
BMP5|653	0.32833	0.469043	2.34475	0.417448	0.140713	0.281426	0.288931	0.750469	23.5863	0.0703565	0.0469043	1.05535	30.4357	117.067	0	2.76735	0.685741	0.750469	0.0938086	6.05066	8.89118	0	0	0.195591	0.211069	0.105535	4.97749	0	0	0.211069	15.9034	0.633208	0.117261	0	31.0882	0.633208	3.40056	0.0469043	8.83208	0.0234522	0.140713	0.281426	1.03189	1.73546	0.0938086	0.304878	10.6337	0.0938086	0.515947
BMP6|654	1.93237	8.69114	8.50853	4.55652	1.72303	5.31208	3.52947	11.6831	5.10499	4.72077	4.93301	6.7285	64.5791	3.84348	4.10564	27.7749	11.2196	4.08309	8.87472	3.62319	5.37585	5.56039	13.494	11.4428	8.86763	100.746	9.12335	4.65926	4.05797	3.39517	8.0905	6.67472	2.62287	6.25411	5.16908	12.581	2.73688	2.05282	8.89243	2.64026	4.43575	4.94396	12.8738	10.2164	7.63253	6.27472	8.60805	2.68921	5.53977
BMP8A|353500	2.53758	14.1335	12.9185	1.9642	12.6149	22.5298	6.88639	27.1232	19.2772	30.1985	15.5252	7.30255	9.8396	6.22457	5.69692	7.51932	13.369	15.1744	3.87593	11.3341	23.9798	19.5581	7.98671	13.4571	12.8291	9.52464	13.5645	16.5601	6.03775	4.25647	12.2419	7.14924	4.26055	11.6048	57.9598	28.8887	6.85448	8.88444	10.4676	6.21429	17.6558	23.981	26.483	14.5801	5.58596	11.3571	5.86955	8.74034	10.8612
BMPER|168667	6.20271	3.11592	1.36011	0.441306	0.676375	0.73551	0.7614	3.01559	1.07385	0.264784	0.514857	0.323625	2.18064	0.558988	0.558988	0.299206	0.264784	3.94086	0.619006	0	0.966755	0.117682	0.191233	1.73198	3.54251	0.161812	1.07061	0.176523	0.17358	1.21977	1.45631	0.941453	0.0588408	0.117682	1.09915	3.31568	0.0882613	0.161812	1.16211	0.294204	0.617829	0.519859	1.96264	1.79876	0.604001	1.8526	3.7511	1.21889	0.438953
BMPR1B|658	62.1142	103.787	450.938	15.4299	55.9109	31.2865	54.9446	15.6807	9.35979	427.444	221.766	0.817529	17.5152	580.664	42.6257	0.478733	5.26791	844.531	35.6881	3.31431	661.203	9.42736	186.309	92.3119	0.316332	3.09335	4.77776	875.805	4.17971	2.41889	639.46	1.37175	18.1887	14.0145	68.5272	8.37175	6.51814	0.416498	2.08175	15.8534	1138.7	6.09869	291.34	4.37636	13.4857	1109.85	18.8724	1626.23	39.4141
BMX|660	1.08372	3.65201	3.99923	3.35648	1.79398	1.11883	0.366512	5.18904	0.931327	1.2554	1.83256	1.16204	2.3534	2.12191	1.06096	2.87847	3.64583	1.16242	0.814043	8.06829	1.27315	0.771605	1.6115	3.0571	4.32099	1.06096	4.99576	2.0436	0.675154	1.27508	4.37886	3.37577	0.655864	1.02238	0.270062	3.82407	2.46721	0.101466	4.46566	0.964506	2.23765	1.13812	6.53935	5.13465	0.673611	2.84761	10.0015	0.887346	1.48534
BNC1|646	0.270797	1.33232	1.32972	0.454939	0.328856	0.422444	0.292461	0.769064	1.26083	0.0649913	0.162478	0.0649913	0.136698	0.0866551	0.129983	0.305243	0.433276	0.151646	2.59749	0	0.0881716	0.0216638	0.110052	0.131499	0.541594	1.20234	0.67136	0.0108319	0.0433276	1.89558	0.19909	0.769064	0.0216638	0.0435442	0	0.294411	0	0.0216638	0.492418	0.498267	0.304809	0.170061	0.389948	1.29181	0.112002	0.281629	2.59532	0.0649913	2.2747
BNIPL|149428	17.1407	92.494	210.217	52.0917	40.2407	58.3875	69.6292	9.08056	6.31111	218.949	29.6505	6.26991	5.01713	27.0486	84.0236	36.2005	13.5977	61.7704	38.8528	17.8069	249.029	3.58704	41.0648	20.4472	9.38843	14.1579	79.281	315.749	76.85	29.7866	168.096	54.325	22.5181	42.631	369.277	63.2083	3.91204	13.6278	8.26157	243.939	61.7903	190.998	56.7102	19.7407	42.8481	132.232	41.6301	5.5787	84.1352
BOC|91653	196.438	33.8379	66.0877	47.0762	18.2076	53.4289	53.1255	45.1348	27.8999	34.921	17.2997	8.34986	19.1246	10.8475	12.9526	76.3716	196.508	10.4428	190.757	27.0669	23.8457	18.841	11.7976	25.0267	32.3945	20.114	46.5947	15.6945	11.3093	8.9718	29.7499	77.2835	6.73009	18.5311	6.70158	76.5553	29.8686	34.5017	24.1915	12.8138	13.0772	26.7667	59.2231	59.1686	29.022	22.3678	82.5163	9.6833	11.6712
BOLA2|552900	61.7984	117.984	270.859	152.663	249.508	128.911	167.391	290.464	143.083	170.315	102.273	373.223	337.71	107.772	158.987	457.245	456.851	254.557	227.559	173.36	227.184	318.85	393.231	412.598	128.854	267.312	248.061	383.893	187.747	463.928	210.596	139.674	293.226	291.078	227.603	181.324	207.447	230.828	176.403	236.611	234.239	196.86	184.643	205.339	246.196	146.597	65.9091	437.207	565.875
BOP1|23246	30.4253	28.5396	62.7461	41.6998	44.3922	53.3101	22.8687	63.7663	332.399	45.5747	37.8394	62.7638	192.517	18.6045	51.4017	131.078	189.184	61.4897	198.278	57.8964	56.4372	41.4955	28.6928	58.9294	30.1156	171.571	50.2052	52.7836	35.616	90.5648	72.2432	28.3295	59.6912	45.9785	113.241	48.1718	133.336	221.153	162.815	43.789	101.736	40.436	52.3105	56.3596	101.27	28.6375	11.0012	42.8468	63.8889
BPI|671	5.02735	1.7091	0.578643	1.7859	0.420831	0.494477	0.184114	0.289321	0.27617	0.853761	0.13151	0.289321	0.221462	0.210416	0.13151	1.59285	30.1862	0.210416	44.3225	18.8448	0.315623	0.236718	0.263019	0.410836	0.683851	1.70963	0.447133	0.0526039	0.13151	0.210416	0.0526039	2.06575	0.210416	0.210416	1.26407	2.44503	4.84903	0.999474	26.3782	0.0789058	0.210416	0.157812	1.394	0.37717	0.259337	0.552341	0.595476	0.267754	0.473435
BPNT1|10380	48.337	75.724	175.401	55.3375	55.9637	109.78	114.004	108.851	93.0333	163.687	82.1841	155.53	113.897	67.0504	63.1581	85.2636	128.164	73.2106	145.126	129.325	111.024	86.3289	52.6608	172.142	49.7155	154.754	40.789	187.105	79.6899	87.1743	84.6595	112.935	169.312	149.958	127.977	69.8479	48.9799	81.0615	141.021	185.225	110.765	144.303	116.475	136.953	145.424	137.073	72.0893	209.063	103.859
BRCA1|672	17.5796	18.7026	40.8031	12.0958	17.801	17.4292	23.1587	24.4846	99.5316	16.5773	24.3444	137.961	57.283	24.6723	13.9687	3.61436	26.1347	36.354	5.35901	74.4478	24.3342	6.82924	24.5919	39.0324	38.0057	30.6413	5.40339	24.8859	20.1958	52.0791	55.9016	7.38851	34.7008	17.5164	9.68042	8.17676	24.3969	18.6522	8.80627	13.5104	62.877	24.5525	19.436	17.5817	28.4919	57.6755	13.799	67.4418	44.5616
BRCA2|675	11.0067	3.72747	6.81225	2.70306	3.04365	4.75721	6.44104	10.858	45.5813	6.26054	5.25285	59.5092	12.3499	2.59891	2.8343	4.64181	4.68117	2.78947	38.3533	2.18228	4.03403	4.77571	7.02974	10.2188	8.54431	12.2317	1.04868	4.4076	2.4116	6.85871	4.57671	2.09173	18.4936	7.81151	2.13878	1.71623	7.42787	3.84835	5.77038	3.44962	6.61814	4.33659	6.81669	2.90916	10.1283	15.7057	4.37653	12.5894	7.99793
BRI3BP|140707	5.75629	13.5786	22.6281	4.23506	15.5896	24.2571	20.4096	38.8404	178.021	17.6832	24.798	74.7469	40.4245	15.8687	9.59827	20.6525	19.0134	16.5763	23.1164	37.5825	6.70362	21.1659	35.57	21.4709	24.3758	29.9725	4.96698	26.4945	16.3978	29.202	34.1753	8.39072	25.919	24.1989	20.3121	7.82233	55.5495	23.2657	27.6792	12.2272	22.8844	41.331	12.8553	18.0928	34.0409	38.5786	10.4292	46.305	23.7115
BRIP1|83990	10.9563	7.1263	15.8473	3.66367	4.55562	7.75087	15.1408	17.7972	48.2205	21.6466	110.348	107.321	14.5379	16.4227	3.65209	7.24189	9.38355	25.1941	24.3195	5.94844	8.44467	3.85139	18.5687	22.0997	11.5359	13.9548	2.1434	6.97567	5.10371	25.1422	13.1127	2.49189	11.5742	9.27173	4.20944	2.36356	6.93975	8.14571	27.8265	4.64571	11.2483	9.26796	7.08546	4.49334	24.2205	20.42	3.69959	19.5771	15.6779
BRMS1|25855	62.6044	180.547	202.007	117.74	125.72	148.966	116.916	222.579	230.621	231.851	216.549	215.146	338.977	102.748	103.868	260.615	249.81	102.557	201.099	347.579	320.736	160.162	284.426	247.245	137.109	150.621	186.443	294.742	171.656	241.552	164.767	122.812	234.435	102.832	282.876	175.871	212.242	205.836	346.688	131.001	176.857	178.715	220.106	205.085	224.368	246.757	64.8956	173.312	235.998
BRSK2|9024	0.115108	1.33813	0.394245	0.706475	0.00863309	0.158273	0.395683	0.786763	67.4576	0.869928	1.42734	0.692374	0.210935	0.143885	0.176691	0.0633094	0.0938129	0.0368345	0.406906	17.6481	1.41784	9.16547	0.190504	27.7637	0.733813	3.10417	0.359137	0.747338	0.676259	10.3885	4.80432	7.23597	0.834532	0.446619	2.49842	1.30129	0.933813	20.1934	0.162878	0.100719	0.0926619	1.05122	0.358849	0.585899	0.429065	0.709065	0.0431655	0.194532	0.125468
BSPRY|54836	120.768	66.5835	221.66	104.799	81.625	207.634	79.3138	60.3776	89.2006	68.4253	34.4226	99.7727	117.684	38.014	136.271	96.354	81.7517	40.6884	371.676	259.903	95.2627	74.7487	109.957	64.1713	20.7465	70.8824	121.993	120.383	90.1115	45.2365	142.125	193.076	92.1508	84.3479	64.0555	63.5913	16.5647	42.736	84.9698	211.06	100.538	261.924	140.822	171.568	67.9921	289.966	80.5074	42.9038	82.8121
BST2|684	42.1587	382.72	975.611	372.043	1346.78	100.907	819.239	269.349	237.048	978.181	775.461	459.511	193.931	63.3713	626.725	736.97	765.161	543.97	233.373	155.621	909.706	50.0702	1795.38	2020.15	1062.86	397.115	835.744	1525.34	1244.57	316.282	272.482	1116.56	1904.57	400.332	1989.09	756.389	1477.77	119.859	321.131	821.175	128.615	683.467	1171.88	776.202	584.007	1526.31	455.754	2263.56	775.007
BTBD11|121551	12.3982	11.4662	13.3179	6.20513	1.40769	12.2362	10.2126	5.30179	4.73564	6.34641	3.48718	2.28949	1.5141	11.6528	3.01128	2.54128	5.68179	2.70333	2.68923	1.53077	2.72897	3.58974	3.3541	19.9187	7.04846	3.15769	5.04872	3.60385	1.35462	6.73667	5.38103	9.05	15.9954	4.44333	3.68538	15.8951	3.58487	1.20179	3.27974	1.23	53.5944	5.97846	10.8895	10.3669	5.32436	1.4	16.6236	1.21051	5.76692
BTN1A1|696	0.0524659	0.12242	0.209864	0.12242	0.104932	0.0349773	0.233298	0.0699545	0.279818	0.0349773	0.0349773	0.0699545	0.244841	0	0.0699545	0.682057	2.25114	0.104932	0.157398	0.198671	0.0349773	0.0349773	0.402239	0.244841	0.454704	0.12242	0.139909	0.0524659	0	0.0699545	0.0349773	0.0699545	0.0349773	0.192375	0	1.03882	0.0349773	0.0699545	0.279818	0.174886	0	0.0874432	0.297307	0.139909	0.821966	0.0115425	0.0349773	0	0.104932
BTNL3|10917	0	0	0	0	0	0.293542	0	0	0	0	0	0	0	0	0.0489237	0.146771	0.195695	0	0.0978474	0	0	0	0.195695	0.0244618	0	0.0489237	0	0	0	0	0	0	0	0	0	0.0489237	0	0.146771	0.220157	0	0	0	0.171233	0.00244618	0	0.00880626	0	0	0
BTNL9|153579	7.44871	11.3055	18.4795	8.1535	3.30129	5.65578	4.92021	26.4985	4.94149	3.34764	5.55547	3.74354	3.06687	8.58929	4.91527	3.68655	4.06725	2.79711	2.1136	2.84081	15.3674	1.30699	4.04521	35.3925	16.291	11.3666	10.0608	6.57295	0.778495	7.9054	8.20669	6.61208	2.77926	6.94567	1.81421	26.057	1.36512	2.79217	1.37158	4.59119	29.5866	9.26178	27.9464	11.0578	6.22036	5.26786	19.6208	10.9612	9.11854
BUB1B|701	9.96325	20.902	60.621	10.6229	12.8033	16.4376	28.8953	35.6314	115.369	46.134	52.5928	217.657	94.7836	16.0716	11.2532	41.2769	43.5468	71.3356	110.879	89.3894	41.2858	25.7409	60.6206	46.4287	32.7999	100.704	4.54417	30.7287	11.7298	21.5876	42.6195	4.51076	64.9105	31.4926	24.454	5.8931	100.224	67.8419	114.265	7.80512	50.7795	22.3471	13.6292	13.964	60.3779	84.3868	11.7854	33.7936	30.1726
BUB1|699	10.133	18.2757	42.5222	15.9087	11.9385	13.3245	28.5322	34.638	171.987	35.3097	31.3206	313.963	83.5278	17.466	10.4758	39.6321	67.2128	53.4965	146.335	47.1232	24.6058	31.8162	38.0665	39.2928	43.1147	147.206	1.72872	19.4548	10.2713	28.7402	45.922	3.11761	106.297	41.4421	18.7654	6.15632	402.495	61.9826	97.1619	5.00887	98.3023	15.1912	17.1655	13.7107	66.3434	74.4122	10.0925	28.5077	18.6303
BUB3|9184	86.376	250.564	257.722	326.558	215.816	230.679	248.527	213.422	559.93	496.993	217.306	427.652	230.607	202.704	214.476	172.084	365.386	451.351	478.669	5206.27	587.317	171.115	440.633	517.685	310.641	417.123	136.244	551.902	271.021	304.868	162.995	304.612	147.838	228.08	149.212	140.485	174.348	142.009	387.322	568.043	362.448	279.102	268.733	891.559	419.858	499.958	188.35	531.872	425.794
BYSL|705	48.6569	50.0998	78.0195	47.8429	30.3591	47.5387	32.4903	48.5865	161.383	58.9496	40.9122	219.107	108.05	33.5576	38.5122	62.6464	95.0239	59.4394	85.2394	191.107	68.8249	33.4564	96.9825	79.0658	34.2813	115.48	39.0254	32.8204	31.1591	111.762	49.6923	31.1486	89.7516	87.1506	82.0269	47.0574	80.2244	93.395	170.562	41.5741	70.5796	68.215	82.1506	38.3761	76.585	61.3322	24.8479	99.8314	61.4424
BZW2|28969	164.939	124.458	640.923	462.723	117.623	347.337	318.305	259.809	432.367	347.8	436.674	683.718	437.93	202.248	207.722	309.547	243.14	208.929	396.583	273.279	352.704	299.644	353.547	299.55	990.946	287.63	173.352	140.76	227.336	766.005	499.372	185.518	209.295	395.655	435.999	133.969	239.203	158.153	507.921	249.915	269.337	343.324	527.203	619.263	802.035	146.467	211.252	216.832	346.519
C10orf105|414152	0.0647587	0.365573	0.459578	0.51619	0.313349	0.328807	0.419469	0.323794	0.51431	0.522248	0.322749	0.689367	0.323794	0.0835596	0.198454	0.733863	0.595362	0.125339	0.171088	0.0731147	0.211615	0.208899	0.299352	0.296846	0.971381	0.119072	0.261124	0.500313	0.292459	0.271569	0.323794	0.271569	0.396908	0.0626697	0.0208899	0.762482	0.114895	0.135784	0.201797	0.334239	0.0626697	0.230625	0.921663	0.605807	0.522457	0.159181	0.501358	0.271569	0.119072
C10orf108|414235	1.08449	0.126103	0.37831	0.0470786	0.0840689	0.168138	0.189155	0.460277	0.0840689	0.0420345	0.0718789	1.13409	0.00840689	0.252207	0.0840689	0.309374	0.168138	0.0420345	0.714586	0.213115	0.37831	0.126103	1.97688	1.14166	0.754519	0.420345	0.307272	0.567465	0.105086	0.252207	0.421606	0.215637	0	0.252207	0.126103	0.462379	0	0.215216	1.60361	0.0840689	0.744851	0.210172	0.525431	0.336276	0.180328	0.126103	0.542665	0.120219	0.0420345
C10orf10|11067	52.4578	250.862	145.072	94.0806	133.314	119.893	57.0869	398.544	167.638	201.275	65.3189	65.7126	307.4	117.286	63.6146	379.768	828.674	76.4272	170.308	68.9272	80.451	284.231	184.388	163.411	105.201	351.809	215.277	56.1194	44.6427	73.1024	162.74	163.574	39.5398	303.394	146.259	437.09	81.6767	575.538	502.914	64.8597	101.591	46.9461	343.283	534.326	186.377	61.7335	243.731	33.5791	34.5587
C10orf116|10974	65.4807	184	1541.17	268.155	1423.34	1454.26	83.378	726.679	220.929	1836.46	60.5372	13.2812	113.573	1124.53	1084.58	73.4836	86.8214	2469.88	22.8973	16.2708	725.234	638.08	2256.69	851.134	60.1592	52.5923	1127.34	1988.64	631.193	1448.71	1150.73	372.482	1103.14	160.207	236.013	463.929	25.5997	687.841	96.4955	618.659	91.006	187.631	721.616	2612.14	268.012	925.74	515.234	677.439	3474.74
C10orf128|170371	2.30203	17.4549	13.0994	10.4843	9.18785	9.04236	8.07366	18.2541	0.552486	6.16943	12.5101	3.06077	16.2836	5.39227	4.24494	6.44383	14.4899	3.16759	9.15285	0.828729	5.9337	2.94107	9.26519	12.7827	23.7808	11.6354	9.48435	3.80479	2.35359	6.44567	14.825	12.93	4.78821	6.53223	1.22284	17.2744	1.4733	1.4733	10.3646	5.39411	6.58195	4.86556	34.0866	20.1823	18.2541	8.61142	18.9134	10.0737	6.37569
C10orf35|219738	22.0375	54.6035	64.0082	35.7097	37.6658	23.7372	31.0183	42.0485	91.9267	55.619	19.9249	65.4945	63.1181	25.8361	53.8773	47.7967	119.223	54.9524	47.0907	231.565	41.619	24.7015	58.489	87.3022	25.0247	74.6676	42.1548	123.638	34.3516	41.2143	65.9066	34.5971	54.587	32.174	79.5614	28.3333	48.587	87.8974	121.335	39.2573	60.9185	45.326	33.6529	69.924	58.3965	45.5797	25.5156	51.1593	59.9991
C10orf54|64115	9.22554	23.1687	30.61	28.5228	15.6249	25.6659	17.8589	35.4052	5.87252	46.9516	13.9146	11.2106	35.9728	12.8705	12.4426	34.1823	94.8669	4.63784	28.421	10.975	20.5206	22.4081	36.8725	40.6392	61.2512	29.8883	24.6144	45.2512	23.3864	12.3802	24.0294	32.671	9.13639	16.0096	14.3091	53.5688	20.4468	9.78872	41.9891	14.5474	13.294	27.0386	69.0359	49.2957	53.2998	16.7731	47.0029	29.4141	15.723
C10orf90|118611	5.79236	0.456811	5.84053	0.228405	0	0.562708	0.373754	0.539867	0.569352	0.35299	0.20515	0.481312	0.131645	0.0880399	0.166113	13.4888	0.615449	0.18397	7.90905	5.87251	0.21387	0.0830565	0.0830565	0.754153	0.290698	0.0207641	1.6196	0.11005	0.103821	0.166113	0.0207641	1.1005	0	0.0830565	0.0872093	2.9485	0	0.0963455	0.170266	0.166113	0.103821	0.13206	0.207641	1.87417	0.173588	0.0506645	1.03613	0.00166113	0.145349
C10orf91|170393	0.338753	0	0.375339	0.50542	1.28726	0.135501	0.135501	0.406504	1.60705	0.813008	0	3.58537	0.203252	0.0677507	1.17751	0.474255	3.5813	0.0542005	0.745257	0.268293	0	0.794038	0.271003	5.64634	0.406504	0.271003	0.880759	0	0	0.271003	0.696477	0	0.880759	1.30488	3.40786	0	0.123306	0.00542005	0.806233	0.716802	0.474255	0	0.474255	0.135501	1.81707	0.219512	0.338753	0.271003	0.406504
C10orf95|79946	0.980259	4.84207	2.55888	3.29748	2.55752	0.782845	0.714772	0.533016	2.43907	6.9857	0.680735	3.48468	3.02995	2.97958	1.8904	5.34786	0.946222	1.86045	2.24166	1.69775	6.05718	2.71613	11.1654	4.70252	2.00817	4.84411	2.23077	4.26889	3.7032	1.39278	1.29067	1.5371	5.05854	0.544588	0.908101	3.56978	0.712049	3.84139	1.3921	2.40368	2.14568	1.44792	3.73519	2.81416	4.08033	4.43771	1.0211	3.83526	8.05037
C11orf31|280636	81.7133	116.726	231.102	197.159	204.487	267.763	243.385	223.168	261.6	292.929	196.515	380.625	336.709	193.467	190.607	181.134	368.429	175.588	305.051	520.717	243.646	179.651	240.709	360.527	104.497	115.906	201.906	366.33	265.082	441.663	297.945	247.713	244.099	114.137	292.331	204.066	209.245	218.866	355.632	219.527	223.623	197.663	310.862	305.251	245.472	98.8192	103.593	89.5943	395
C11orf35|256329	1.66966	2.81265	8.37895	4.7815	5.93723	6.40727	3.958	6.87305	2.66305	6.0571	1.80179	1.08495	2.43889	5.58235	4.85229	2.21425	1.74941	5.17744	2.23313	0.448325	6.05002	1.75507	9.87353	12.068	2.46437	3.72062	5.36196	21.4889	8.86833	10.462	9.41907	5.06135	7.59745	2.82822	3.00661	2.15668	2.02926	3.79991	0.376121	6.24257	10.764	2.88863	7.09202	4.98395	1.34497	5.12553	2.42426	6.55309	13.681
C11orf48|79081	38.1415	71.4768	77.1879	100.999	84.1297	93.6993	67.0442	119.957	125.872	111.088	154.802	196.006	214.222	93.3611	90.0184	227.418	230.385	126.21	187.324	206.158	200.734	87.2535	359.679	395.875	72.9772	132.225	93.4628	256.511	156.483	272.149	109.403	100.125	256.445	133.246	297.908	152.169	133.39	191.724	232.932	124.967	124.149	123.626	145.693	133.742	194.653	82.1511	60.462	152.579	198.035
C11orf53|341032	0.220615	1.23508	1.49186	1.81917	0.542495	3.33183	0.542495	0.678119	54.2188	2.4349	2.57685	0.723327	21.7694	0.218807	0.406872	0.316456	0.731465	0.768535	0.271248	0.045208	1.1962	7.1745	0.587703	0.542495	1.16637	0.542495	0.711573	0.813743	0.987342	0.587703	0.316456	0.45208	0.180832	0.135624	0.813743	2.23779	0.0858951	0.497288	0.490054	0.0904159	0.045208	1.44846	1.80832	3.6962	0.234177	0.587703	0.271248	0.0533454	2.07324
C11orf80|79703	39.3344	53.364	55.2202	31.4297	57.1432	11.7071	33.7609	65.4093	62.888	72.5557	328.555	59.6392	95.56	42.2924	40.2154	45.8045	58.6968	31.3662	90.8061	45.9192	49.839	59.8988	53.4356	105.423	87.8691	30.6618	59.4211	40.9181	61.5977	42.5649	52.469	20.8697	121.387	21.7017	69.447	29.9677	16.1551	76.5751	83.4583	34.965	93.9128	44.8013	75.364	42.2676	70.7447	186.103	35.6893	16.2348	26.1492
C11orf82|220042	7.3692	3.24435	7.32759	5.71938	8.00892	7.55054	13.0945	8.17479	27.0244	6.97087	16.7048	82.8103	16.3106	3.02765	7.14744	9.03686	24.6879	11.4474	35.8844	5.60345	4.85226	16.3496	8.36801	8.52289	10.4055	15.6793	3.32848	7.44946	11.6825	10.0773	2.86861	3.478	56.7583	22.2785	6.8799	2.52675	20.0803	14.0104	17.3291	6.25595	10.6703	13.9111	6.85196	7.33026	35.8555	8.83977	3.14328	11.7375	35.948
C11orf83|790955	34.5213	43.6459	79.0456	123.926	88.4909	100.904	81.3055	129.383	141.725	92.9498	124.786	221.298	267.254	68.8891	69.4954	395.579	200.725	120.242	127.229	308.626	166.391	157.217	191.612	200.518	40.1809	102.761	125.71	188.394	123.767	385.894	151.839	84.3723	153.655	60.5213	239.736	156.111	130.688	162.205	204	78.1793	110.152	122.128	148.445	171.354	118.305	57.4985	43.5243	81.3024	186.558
C11orf84|144097	23.1173	15.2529	30.4187	22.1438	26.5221	22.771	38.6386	23.4901	203.504	29.1147	27.1206	103.407	130.471	12.8254	25.6654	53.2871	58.182	23.7772	93.6048	109.754	58.7529	51.893	40.2607	71.6221	21.7893	55.2463	27.582	61.3456	35.0169	41.0864	48.0713	22.5085	90.411	21.1018	58.2423	33.9478	79.1456	104.269	113.607	17.0974	38.2636	35.2265	48.9813	29.9419	50.5805	21.8596	16.6743	48.5221	39.4996
C11orf92|399948	2.83018	1.5714	7.48888	2.62599	0.799485	1.90627	0.906819	1.53391	54.4926	1.21577	1.29572	0.611836	9.47528	0.679103	1.00165	2.06653	3.04337	0.748208	2.56644	1.33248	1.63573	36.9917	0.787539	10.1959	6.96085	0.578938	1.51608	1.23139	0.615696	2.56387	1.06083	2.98658	2.22055	0.431906	7.14666	3.28984	0.568645	13.78	1.03841	0.66293	0.624885	0.679103	1.88384	2.8855	5.12222	0.885683	7.16449	0.578938	1.65999
C11orf93|120376	11.727	1.83522	4.05375	4.5	0.990099	4.70934	1.13154	3.57426	452.354	1.90806	2.26238	0.318246	122.361	0.985149	2.44908	4.35714	5.00566	1.09618	3.92221	4.23197	0.742574	2.36917	1.1669	11.21	3.34936	0.848656	2.09477	0.388967	2.51061	4.6075	0.58133	3.27793	2.43352	0.933522	35.2808	4.20721	0.700141	31.1634	1.53678	0.742574	0.353607	1.73267	2.61669	4.01344	5.39887	0.657001	3.06082	0.212164	3.88967
C12orf32|83695	49.8491	64.7345	134.175	89.8263	64.8116	80.2535	51.4517	229.881	608.431	123.196	98.8496	533.591	483.279	49.6183	58.8724	103.073	214.112	96.924	273.834	124.945	111.18	111.025	178.148	185.871	76.1292	77.7644	55.1536	189.071	127.748	99.4142	126.438	71.2193	137.803	85.3409	87.2932	70.6249	125.12	127.559	181.766	66.3382	46.8713	107.205	108.164	115.759	143.958	121.385	52.1173	180.246	117.068
C12orf34|84915	3.63456	15.1216	8.56728	5.77186	6.74351	4.30328	7.89344	7.40881	151.704	43.6687	28.7626	36.4617	22.3801	21.1445	5.31045	20.1492	2.02186	10.1014	10.3169	13.5007	33.9211	11.3569	38.6626	17.1089	10.959	2.37602	3.22609	46.6738	24.4819	25.9081	30.5451	13.0492	35.6154	15.2152	2.47609	4.48873	4.45697	19.2531	2.0321	5.27664	27.7179	25.6066	6.89276	9.21311	34.5441	15.1335	2.30533	79.0256	27.0359
C12orf39|80763	1.93182	0.909091	0.568182	1.70455	0.454545	1.25	1.02273	5	80.4023	1.02273	0.702273	16.6955	7.37955	0.568182	0	9.65909	7.27273	0.681818	1.36364	0.681818	1.93182	1.93182	3.29545	5.68182	4.21591	2.15909	0.568182	1.59091	0.454545	3.52273	8.97727	1.25	1.13636	0.909091	3.75	13.2841	1.81818	2.38636	2.64545	1.02273	1.13636	0.795455	26.0227	2.07727	0.681818	1.64773	0.681818	1.59091	11.0227
C12orf48|55010	7.21382	9.27138	16.7479	4.2352	5.78248	12.6743	17.7619	17.3676	61.9174	14.4359	26.0074	115.554	33.3417	7.89021	6.62664	21.3701	16.7126	25.8898	29.947	14.2673	13.389	12.0399	20.4256	28.7146	14.4716	49.8882	2.84581	14.5839	10.2652	31.0296	18.2204	5.20683	36.7504	24.5222	15.5337	10.6073	38.3651	12.0572	25.4622	5.31743	24.0218	10.882	12.7562	13.4519	21.9453	28.6875	4.6875	21.2919	28.4305
C12orf52|84934	32.1994	49.4135	54.7478	24.0622	43.4018	74.7214	36.0651	48.2669	124.455	83.2188	78.3496	131.768	123.637	45.2452	39.9707	42.9032	66.3232	51.1243	73.9718	175.714	94.8152	66.5103	83.7572	70.8598	34.1935	64.0405	43.827	104.569	74.6041	103.446	65.2751	59.2375	89.8323	62.8739	168.46	49.2082	36.6276	48.539	93.7771	52.61	79.0868	91.356	72.2774	94.8927	63.3742	91.6733	27.8974	119.877	103.57
C12orf54|121273	0.502152	1.68867	0.215208	0.624103	0.215208	0.430416	0.071736	1.38737	0.645624	0.430416	0.71736	0	1.86514	0.143472	0.502152	1.29412	0.401722	0.296987	0.860832	0.143472	1.16786	0.573888	0	1.7934	0.071736	0	0.143472	0.071736	0.131994	5.13917	0.286944	0.502152	0.286944	0.502152	1.0043	0.645624	0	0.286944	0.789096	0.573888	0.430416	1.72166	0.502152	1.86514	0.430416	0.215208	1.37159	0.195122	6.83214
C12orf59|120939	0.461648	1.22514	0.603693	0.90554	0.785156	5.87713	1.74467	1.2429	4.49219	4.5277	2.13068	1.29616	2.91016	0.497159	1.58026	2.29048	3.97443	0.497159	0.870028	19.3892	2.66442	1.02983	2.92969	4.99148	3.05149	3.23153	1.22514	4.93608	2.23722	1.24112	0.710227	3.32031	0.923295	1.13885	0.426136	2.8054	0.799006	0.993608	1.01207	1.45597	0.159801	1.66903	4.33239	2.37962	1.02983	2.92969	0.834517	3.79972	1.02983
C12orf70|341346	0	1.03852	0.290881	0.522013	0.418239	1.72327	1.11635	0.43239	0.275157	0.806604	0.632862	0.139151	4.12264	0	1.50157	1.66509	1.70755	0.511006	0.726415	0.459906	1.2327	0.940252	0.157233	0.48978	0.261006	0.501572	0.959119	0.543239	0.696541	0.786164	0.363994	1.32469	0.43239	1.05425	0.498428	0.649371	0.852987	0.84827	1.07783	0.550314	0.196541	0.353774	0.968553	1.63758	0.0786164	0.212264	0.275157	0.158019	0.564465
C13orf15|28984	187.027	55.7158	94.1812	38.4663	35.6767	142.559	114.998	79.452	64.5435	164.876	35.5373	58.2425	43.7922	33.2806	78.5639	230.766	132.726	39.6847	110.551	84.2877	68.3863	45.4503	103.663	121.833	72.8801	35.4325	72.6332	74.1989	130.44	62.8135	44.1829	161.951	22.7948	83.103	15.1261	92.8073	116.166	45.4298	95.9609	31.1234	84.8819	82.0702	196.067	130.618	71.913	37.7558	208.263	56.7993	55.6252
C13orf33|84935	2.79992	15.3885	13.8638	4.6533	6.63576	10.8592	22.5647	17.2151	76.0301	10.0171	4.75397	6.99708	17.2619	3.93233	5.26525	33.8943	8.70384	6.79825	5.05305	13.4165	29.5292	15.5944	4.14035	21.858	22.2882	17.1303	10.4641	8.88095	6.90727	6.75773	30.9628	35.9891	2.40184	16.3104	3.60276	20.325	7.05138	5.48454	34.3421	4.36216	2.90184	12.2427	76.9758	34.7765	4.90393	24.5401	59.2114	7.78028	26.9545
C13orf36|400120	0.0310655	0.0621311	0.0310655	0.0465983	0.0310655	0.0155328	0	0.636844	0.745573	0.0465983	0	0.124262	2.86921	0.0310655	0	0.0776639	0	0.0481516	0.155328	0	0	0.064927	0.0027959	0.0931966	0.124262	0.0310655	0	0	0	0.155328	0.0931966	0	0	0	0.124262	0.0931966	0.388319	0	0.0931966	0.0155328	0	0.0338614	0	0	0.0621311	0.0310655	1.55328	12.3489	0.0776639
C14orf128|84837	7.88594	7.61172	13.1641	6.81328	8.78906	9.06875	5.23438	15.5867	3.4375	10.7688	4.25859	46.1742	11.3398	11.4945	8.04688	26.7641	15.757	3.75	11.6609	7.27187	9.29219	20.8984	12.4703	9.13594	4.41406	14.2914	10.4625	15.718	3.61406	13.3984	7.01719	9.89141	11.8031	2.42188	31.0539	13.0773	8.28125	0.351562	5.71875	4.94453	8.93828	6.19688	4.10156	11.7016	2.28359	8.86719	11.2711	5.70156	7.98203
C14orf139|79686	23.5755	8.04359	7.191	5.30262	6.75514	11.6311	2.16938	8.02268	80.1843	6.28313	4.13501	4.14989	9.92665	1.54146	5.28774	5.4022	12.2353	3.14033	21.6265	2.99433	7.90716	3.09887	4.33522	11.365	18.1605	6.53366	11.5429	7.02339	1.34656	3.47626	11.8682	6.40751	1.16017	2.35897	1.48086	17.5425	0.336641	3.67612	9.72679	3.70163	3.69596	10.3427	49.8324	11.6021	13.1091	8.35046	19.696	4.35117	9.22644
C14orf174|161394	2.09877	6.66667	14.9136	10.4765	4.29136	5.50123	7.02272	3.25926	4.55062	11.9244	5.6	2.9921	3.38568	7.20593	7.60247	0.88642	3.64148	3.36593	1.23654	1.62963	2.68642	2.51605	5.50765	5.84444	3.38963	3.40889	4.9116	23.8568	10.0642	5.27654	9.00494	22.4889	9.10815	5.59556	1.1358	3.7837	4.10963	1.2321	0.991605	25.12	10.4509	15.8741	6.08593	5.99309	2.88148	4.16593	6.35802	19.5644	6.23407
C14orf180|400258	0.392157	2.79346	0.0183007	1.68497	0.588235	0	0.384314	19.7255	1.26013	0	0.130719	0.130719	2.48758	0.522876	0	1.88497	0.784314	0.718954	0.896732	0.130719	4.15817	0	0.130719	12.9412	4.32026	0.0156863	1.43791	0.290196	0	0	15.4758	0	0	0	0	19.366	0	0.0392157	0.745098	0.261438	3.81569	0.867974	36.6261	1.58693	1.17647	0.807843	1.96078	1.88497	1.30719
C14orf49|161176	7.89966	4.11169	4.41853	1.33477	3.20589	5.1212	2.11016	4.22676	46.5376	3.29856	2.59282	5.49248	5.94692	3.33569	1.91777	1.14698	4.52286	1.38539	12.4768	1.04326	2.53084	0.981896	1.44308	3.31789	7.05278	6.97146	2.57502	1.26266	0.460264	3.65787	4.75514	1.30408	0.951212	1.53421	1.02854	5.24732	0.551703	1.7579	3.56152	1.16263	0.951212	2.38662	13.6456	4.71341	4.75453	5.71556	4.45259	1.82786	2.97637
C14orf53|440184	0.188147	0.329257	10.3565	0	0.98777	0.0470367	0.0084666	0	0	0	1.4111	0	0.0470367	0.0470367	3.14675	0	0	3.85701	0.0573848	0	19.4318	0	0.0206961	0.158043	0.0470367	0.14111	2.63405	0.496707	0.0940734	0	1.17592	0	1.03481	0.0470367	0	0.235183	0	0	0	1.35936	0	0	0.28222	0.188147	0	3.10442	0	0.570085	2.06021
C14orf80|283643	12.2975	20.3117	32.9698	26.0148	25.9481	23.5457	40.0747	30.5698	35.8846	40.3414	24.1728	65.9389	71.6549	8.01852	16.2994	33.9222	35.5494	18.5346	25.2623	14.7809	19.8457	33.2846	32.6994	37.9685	13.887	32.7617	13.8722	33.192	22.5685	33.6864	23.3444	18.5148	34.3093	27.7444	22.3698	16.5444	45.3352	42.5315	28.1599	22.9895	16.7383	12.8833	24.4253	16.0864	23.5753	14.2691	7.60494	16.3377	31.5
C14orf86|283592	0.041632	0	0	0	0	0	0	0.020816	0.694838	0	0	0.633639	0	0	0.0020816	0	0.0041632	0	0	0	0.00874271	0.041632	0.00582848	0	0	0	0	0	0	0	0	0	0.413822	0	0	0.020816	0	0	0.00874271	0.0399667	0	0	0	0	0.00832639	0	0	0.041632	0
C15orf23|90417	18.0091	48.582	49.515	16.8463	27.9353	32.0476	37.3426	47.7028	120.42	58.5366	68.4526	154.707	126.353	24.8724	30.3176	72.9223	56.0284	63.5496	95.6444	89.3647	84.9943	36.3301	91.7663	96.059	35.4509	101.271	17.3256	54.6194	50.4538	40.726	41.042	39.3931	111.102	39.1095	36.7555	14.2343	150.972	80.2399	104.46	24.9007	57.1441	34.2881	21.4458	25.865	56.6999	94.2995	18.2643	54.6863	67.9524
C15orf42|90381	4.56813	4.65491	8.34343	8.57626	2.13589	3.00572	4.78582	9.02806	23.6346	7.11041	9.97027	74.7555	13.9186	3.32349	1.80022	11.1361	9.45735	9.89605	82.019	5.44682	5.30502	2.74188	11.6442	13.1167	6.47434	20.4232	1.0709	3.21455	1.27714	2.42799	6.6527	0.62777	14.1291	6.65362	4.08863	1.36725	32.6486	13.7699	40.5794	0.653988	10.1926	3.61632	2.41784	1.64697	8.60764	5.84823	1.39402	3.06536	5.85174
C15orf48|84419	1.72018	66.7385	116.948	13.7305	26.8005	125.229	113.377	78.039	60.8372	78.4094	49.7053	12.3853	98.6514	41.6858	42.4358	40.9943	292.733	414.19	106.062	6.47936	79.4725	14.5069	188.818	455.603	79.3578	90.4576	34.9771	19.1514	530.858	26.1468	10.9151	252.211	668.163	160.55	14.5011	64.3922	52.867	12.9587	105.22	31.422	112.435	24.5413	410.356	84.3658	151.428	462.695	92.1984	59.1927	653.748
C15orf51|196968	3.8392	1.76735	3.0782	0.755621	1.26149	2.77957	1.24633	1.36461	1.98974	1.53617	0.512219	3.23705	0.829423	0.928152	1.00929	1.84604	1.9741	1.02884	2.53959	0.977517	3.30645	0.560117	1.92962	4.15152	1.9218	1.8089	2.02688	1.96481	0.303519	1.0479	1.66569	1.65445	0.756598	0.195503	1.87488	2.19746	0.513196	2.07136	1.73021	1.50831	0.707722	1.82991	3.69013	1.83284	1.76491	1.20381	3.35337	1.40616	1.42229
C16orf13|84326	90.5275	169.679	300.945	215.583	257.938	165.639	150.554	285.624	131.014	269.994	118.45	208.872	316.948	164.147	226.795	687.467	231.084	275.72	364.814	510.434	537.154	368.35	357.994	374.163	92.0468	151.46	477.719	812.299	504.106	262.074	308.371	198.085	286.362	303.493	570.052	299.486	278.479	323.442	140.395	366.036	334.021	299.745	221.384	260.241	356.91	185.059	87.2741	363.674	292.366
C16orf53|79447	37.6687	43.3146	151.962	88.1176	126.355	85.8171	68.9227	116.767	56.4296	115.168	75.0812	133.727	91.7171	54.7705	108.343	196.487	102.557	182.538	94.0775	60.0768	140.905	50.7804	194.094	151.675	32.471	58.6945	110.013	283.228	90.8264	141.343	209.078	71.6453	95.3018	90.4062	126.582	90.5756	34.7747	131.791	71.3323	106.362	90.2979	108.384	73.0632	120.034	62.8915	76.1241	34.0317	100.785	229.386
C16orf59|80178	7.44617	4.69498	26.259	10.317	13.3726	7.77512	27.945	18.2117	40.939	34.951	13.2177	43.6202	40.1728	11.6029	12.6758	18.6148	16.8128	27.8038	29.0766	55.8911	20.8218	17.759	20.0712	18.6603	10.0478	23.5945	9.62739	17.5694	12.8349	15.5502	22.7919	2.96053	31.4611	19.0191	19.8864	7.48026	57.89	37.1818	22.7841	7.53589	34.6591	12.3206	5.47249	5.52392	19.1639	10.9115	1.61483	10.1077	33.9115
C16orf71|146562	0.752946	1.07769	11.7165	5.77062	11.3693	5.25147	4.36524	2.80744	0.429676	3.32732	0.832106	1.88549	0.860825	1.00589	9.49264	1.59057	1.01289	3.08947	0.744845	0.62592	3.18483	3.47717	4.83763	2.31001	0.66863	0.902798	10.6889	28.4716	12.7703	3.162	5.20029	8.5151	1.94661	9.72496	0.465022	7.57069	0.128866	6.98785	0.388807	21.3391	3.9838	10.8159	4.64948	10.5482	1.94661	3.46429	1.79161	9.46576	7.0232
C16orf75|116028	14.886	20.9112	59.6303	30.0876	29.2689	28.2977	105.409	38.6843	103.653	42.2125	21.5432	445.144	133.325	10.497	31.5864	100.445	65.3067	46.9976	100.791	13.7155	56.9004	27.0258	106.864	47.8836	34.3529	40.4202	11.7629	73.6333	46.6327	55.8187	34.1146	10.9628	70.3752	103.408	66.997	6.84274	59.53	62.5096	51.5918	13.9856	45.1825	37.7821	25.7407	28.2851	39.1218	39.3745	8.76351	66.8643	66.6008
C16orf86|388284	2.13323	3.10629	4.34132	3.16093	6.25	6.2762	3.76946	9.20434	2.62201	5.80165	1.90868	3.36527	5.27246	3.89222	3.29341	2.48728	8.12575	1.30988	4.71033	1.30988	5.56213	2.28293	7.12425	6.28743	3.70509	2.36976	4.34132	7.81662	5.46407	3.10329	9.39371	8.64446	3.1744	3.29341	3.41467	7.55988	1.59356	1.49701	8.19985	1.42216	1.75898	3.58533	7.26048	4.76497	3.59731	10.7552	2.99401	14.8578	6.36228
C16orf88|400506	43.4286	67.5902	153.926	74.9493	88.4134	84.6241	84.8759	49.9681	79.8176	91.3576	51.8191	283.453	126.997	41.6398	175.985	92.2766	68.8723	63.7381	138.648	28.6474	134.742	46.4802	114.985	98.7766	35.5932	73.9108	67.0299	123.552	98.2604	79.462	97.7199	63.3931	105.321	158.944	81.3475	49.114	47.423	138.55	92.4225	161.054	102.367	129.241	66.3085	87.4858	77.8425	45.9656	31.1378	135.68	143.917
C16orf89|146556	18.6603	5.08261	10.4206	2.75567	207.168	0.813845	8.35486	9.74346	5.032	1.17161	0.465387	12.6033	12.9587	9.10006	276.998	7.75334	15.4904	1.1402	1.98138	2.40663	232.347	82.4567	1.20477	6.49331	3.4904	0.559628	28.1536	15.3409	0.936591	2.00698	6.03723	6.33042	1.68703	3.74636	1.91099	16.9459	0.465387	10.9471	3.17045	36.6021	4.88249	107.671	3.66492	9.20128	10.6434	262.781	84.9197	2.03374	620.465
C16orf91|283951	29.6603	35.8175	55.3075	49.0524	105.233	53.2974	74.8992	65.2339	50.2258	40.5484	20.7732	68.1532	89.6956	28.0665	81.7369	46.0323	54.6008	48.5423	155.205	118.792	60.3962	61.0081	57.7742	94.9869	41.5756	97.1754	80.7702	88.0131	54.6976	86.7601	51.7762	40.1502	73.6835	94.6653	46.499	45.0635	32.751	107.827	64.2339	83.37	88.0423	78.3569	52.374	71.8448	44.2944	35.0565	21.9738	64.2651	147.396
C16orf93|90835	4.1015	4.04973	18.6505	10.9891	22.5313	4.02452	9.11308	15.0286	17.6451	14.609	3.28951	14.6935	9.94959	5.50068	21.3535	7.70708	10.0736	6.75749	9.89169	6.49659	15.4952	8.8045	19.9816	25.483	8.58447	5.36172	21.0286	55.8317	19.7418	10.5729	23.3134	19.0708	6.3515	7.27929	8.67575	7.3842	1.52112	5.05926	11.0729	21.7684	8.6921	21.1247	10.2977	18.7187	12.0034	12.4843	5.66417	38.8644	37.8685
C17orf103|256302	14.0625	14.4815	27.3858	12.9634	18.5452	32.4475	10.4251	29.408	46.8281	22.1243	22.0996	23.1903	12.1629	7.49384	14.0054	7.37456	19.1124	5.26885	12.0577	8.13996	17.6948	12.3677	23.6679	14.8632	14.4473	9.01233	17.399	15.813	14.7186	10.2962	28.4491	21.8314	7.8145	7.81262	55.4924	37.0654	9.4414	15.0322	8.97493	10.8404	6.33695	30.7322	47.0817	28.6637	17.5709	31.4978	28.4556	36.5584	14.8458
C17orf28|283987	59.7471	255.825	263.516	189.844	256.9	518.678	145.871	278.533	152.147	1188.29	162.568	367.926	34.6192	255.183	182.891	121.735	83.3436	406.036	31.3549	36.9002	341.428	229.501	508.919	622.029	103.492	8.02266	191.866	563.891	308.792	505.649	411.097	140.127	373.341	351.573	184.697	617.157	32.5844	739.463	31.9276	239.098	442.918	202.555	247.89	313.879	619.529	388.168	121.947	460.314	242.477
C17orf37|84299	64.9693	156.48	246.671	181.493	194.028	255.236	92.4584	255.447	301.104	3396.04	4110.54	352.533	240.507	355.773	178.653	496.854	250.526	268.136	201.588	429.909	370.332	2004.65	5329.25	605.595	109.398	160.382	170.236	593.536	348.327	734.538	616.689	231.933	116.922	3484.08	101.397	253.593	161.85	3067.76	120.143	210.656	564.553	322.75	246.983	184.298	340.351	312.515	119.291	614.577	510.941
C17orf51|339263	12.7539	5.01672	9.08733	3.04701	3.55744	18.022	6.47069	5.79504	10.7626	7.88474	4.80724	1.20574	13.4955	1.21361	6.05232	8.28541	9.90441	2.51869	5.17388	11.6526	4.61428	13.9717	4.62569	2.74095	8.95653	2.63336	6.29091	2.2858	2.88985	2.33556	8.09736	5.26121	1.48466	3.68509	14.9481	15.5071	7.80783	4.5356	14.2341	1.78442	2.44315	6.56589	11.0201	8.48603	5.13493	3.18352	8.3989	1.28482	11.1105
C17orf62|79415	42.3696	107.642	158.114	95.6708	140.717	221.376	137.307	166.043	85.2076	376.309	95.7967	255.436	112.641	66.3501	143.932	182.433	217.393	176.798	122.045	71.4608	130.122	125.005	184.235	294.996	140.477	150.074	159.055	192.033	175.267	208.437	171.723	110.286	133.259	115.722	95.4727	120.534	75.0874	111.714	93.4679	108.286	108.064	138.658	229.144	186.583	227.184	121.084	92.6176	155.016	132.821
C17orf90|339229	25.3519	46.0593	76.0301	54.6764	49.1021	97.5953	37.2817	98.6007	35.8377	246.066	20.4093	242.321	98.9954	40.6682	48.1222	336.625	93.5479	71.4831	73.4622	50.5442	101.84	50.5141	149.245	185.212	50.2306	77.1094	66.907	143.213	84.2242	176.313	76.0228	32.6281	71.2744	54.3099	206.233	70.5123	31.3263	76.3355	52.7201	46.2735	56.2005	54.8897	77.9663	68.4038	87.1714	46.1951	30.2078	148.035	113.398
C17orf91|84981	12.872	16.7381	16.4159	9.4122	15.6622	27.5647	16.0387	27.6548	4.87351	48.4531	17.9315	5.55878	13.9911	7.12723	16.2098	43.1176	30.1466	13.0484	6.6131	14.8095	27.0089	27.6719	23.4844	37.9092	20.4717	27.9754	23.9829	32.2545	27.8839	12.4405	28.683	29.1109	7.32887	16.9643	9.70387	31.8192	3.8683	7.93006	19.974	8.89137	12.4955	31.9405	64.2299	26.7924	15.4226	32.8438	43.8787	24.2247	55.6176
C18orf34|374864	0.373134	0.881954	1.64518	1.00068	0.644505	0.339213	0.169607	1.56038	0.763229	0.203528	0.305292	0.747965	0.983718	0.373134	0.457938	0.374152	1.37381	0.373134	0.169607	0.203528	1.28901	0.237449	1.49254	1.73541	0.949796	0.050882	2.18792	0.781208	0.220488	0.474898	0.842605	1.47558	0.0848033	0.118725	0.593623	1.81309	0.27137	0.101764	1.00068	0.27137	0.864993	0.25441	1.35991	2.05495	0.610583	1.05529	2.64586	0.395862	0.542741
C18orf45|85019	33.5639	32.383	72.4302	37.2665	37.0979	73.1882	34.4171	49.586	64.8642	97.1968	44.7415	165.212	47.3009	28.1817	62.8307	31.7253	58.9411	56.627	149.009	95.5315	54.9083	35.4061	58.9855	72.5309	56.7294	51.3423	34.4881	73.443	69.6243	50.3974	39.6432	90.9183	54.4929	45.3812	44.526	45.4978	23.8773	103.786	133.911	96.837	37.8845	112.495	44.7573	98.375	103.38	92.7184	39.7235	58.8059	124.338
C18orf56|494514	3.59186	1.21279	10.2651	2.32558	3.87907	3.43372	4.85698	4.99767	47.1023	6.0186	2.94186	38.0709	11.6605	4.97674	3.43023	10.3744	8.18605	4.62674	16.9802	3.86279	4.50233	2.84884	13.6814	17.8558	5.60116	12.7523	0.930233	12.4756	7.0314	3.56395	2.1407	4.36047	3.72791	2.3814	2.43023	1.45349	6.79535	5.30233	52.657	0.697674	3.23837	5.19767	1.22093	4.65581	7.09651	7.83721	2.25465	3.41977	7.54767
C19orf10|56005	152.503	189.522	581.666	270.182	289.122	406.235	289.228	354.515	143.559	768.201	342.952	383.202	455.093	273.531	208.679	420.749	563.54	314.703	357.923	454.994	336.18	468.185	637.666	644.315	218.446	317.149	265.071	668.594	363.405	407.143	349.847	313.496	270.994	286.415	539.097	429.27	406.955	509.432	380.59	238.409	264.201	425.224	457.231	423.144	591.43	843.934	183.72	400.867	339.56
C19orf21|126353	1.42415	88.2133	150.435	151.139	115.065	135.821	9.37083	118.593	16.0898	160.911	131.855	2.96594	27.978	38.173	51.5676	0.206398	3.12384	59.5466	14.9106	4.21087	112.183	54.6918	107.349	174.283	31.2401	13.7895	69.934	115.157	140.696	182.179	143.955	18.4689	91.8975	29.1197	122.973	11.8349	3.54076	77.5157	0.894049	94.5026	74.0076	102.51	11.8294	86.0829	24.6436	159.495	22.2398	86.5796	148.337
C19orf22|91300	103.266	94.1042	268.38	237.782	217	237.172	123.131	209.474	165.597	195.636	174.127	284.874	401.672	112.78	172.748	340.923	304.156	207.436	168.088	242.078	315.858	204.626	336.48	404.105	115.012	177.602	256.062	473.815	337.822	226.526	309.214	155.116	144.042	150.85	408.076	247.704	151.83	502.653	204.014	153.404	143.412	240.427	363.017	296.249	266.386	269.876	116.375	209.988	387.909
C19orf24|55009	60.0253	67.4481	148.841	116.738	112.605	166.513	83.7722	140.915	81.9899	148.777	138.215	142.361	281.71	133.556	83.1734	190.882	236.206	129.922	154.529	376.732	170.099	249.143	325.261	261.097	73.3152	163.305	148.495	452.578	281.12	188.692	240.324	118.39	116.922	101.254	277.803	282.957	139.247	596.009	133.039	127.989	67.5456	168.808	190.267	159.484	190.735	64.5405	44.7557	118.961	215.01
C19orf26|255057	1.29719	0.624415	1.22387	0.734009	0.721139	0.624025	0.538612	2.30265	4.01794	3.98167	1.23323	4.91303	3.14821	0.815523	0.689158	0.354524	0.942668	0.9883	1.86739	3.99454	1.55538	1.37793	0.550312	4.46451	0.730499	0.101404	1.90562	3.84672	0.982449	2.36271	5.21919	2.211	2.48518	0.977379	2.70827	1.25858	3.76872	1.16381	0.916147	1.64587	0.323713	2.09867	1.3514	0.853354	0.887285	2.32956	0.599064	0.864275	0.463729
C19orf28|126321	44.0893	55.7939	107.278	93.8069	94.8127	132.818	61.6114	97.1772	105.711	247.625	89.6071	173.565	272.561	81.9717	79.5898	166.482	138.004	55.4145	146.691	242.072	113.075	187.066	135.361	202.863	77.3991	130.93	104.544	150.325	125.948	92.0903	132.715	92.928	61.8804	66.8247	264.369	148.275	151.474	303.198	284.502	91.5077	39.1407	91.2872	167.264	106.282	156.392	125.23	59.9808	104.389	162.799
C19orf33|64073	31.6735	234.635	375.218	498.459	292.955	374.465	8.22857	635.378	1.89184	1189.59	96.5755	1.31224	12.2184	411.978	82.6061	118.402	26.7796	2.9102	2.14286	14.7367	686.067	21.3061	424.298	12.1327	60.4653	11.4837	355.808	8.93061	13.0612	121.988	376.647	20.8449	808.851	2.14286	1090.01	120.531	24.2612	1.62041	16.3245	321.351	261.488	10.8388	145.624	204.514	2.95918	225.537	22.2327	21.6224	471.91
C19orf40|91442	8.36111	12.2248	28.809	12.3108	15.4253	18.9609	14.7231	15.4219	32.1606	15.704	15.428	28.1493	21.4661	10.263	13.2873	9.98698	22.9297	11.5043	29.8524	10.112	22.9905	13.1484	34.9253	24.1823	14.5885	20.4705	12	34.8655	17.6953	17.8368	20.8385	13.0677	54.5234	17.0981	17.8099	18.4965	24.9366	26.6128	29.7778	25.2535	12.4358	24.388	17.9635	12.7274	22.23	22.4384	10.4201	16.4627	30.8021
C19orf45|374877	1.05634	1.87402	2.05321	2.29812	1.277	0.508607	4.22692	1.63224	30.1142	1.9554	1.73318	12.0814	1.8748	2.65649	1.61111	0.717527	0.273865	1.63224	0.704225	9.24178	1.85368	0.541471	2.33725	4.73787	0.753521	1.00078	1.62598	13.144	3.77465	7.39124	5.70579	2.66823	1.64319	0.456964	17.1894	1.22535	1.11424	5.77778	1.30516	1.72066	0.252739	0.938967	2.83333	2.48044	1.45462	1.42645	0.86072	5.90767	2.50391
C19orf46|163183	9.46999	41.9019	73.3726	42.2643	45.9949	38.6581	25.6581	79.4473	25.8968	100.324	33.9026	29.5981	27.8924	40.8741	42.4744	89.6266	9.16984	69.2365	4.62738	27.4451	68.9187	36.4407	115.45	148.726	18.8873	22.9275	66.4671	107.247	82.9187	84.549	58.0827	35.7035	48.2555	46.7174	87.2072	47.6149	64.8294	6.25256	70.1786	48.8704	61.3119	51.8155	70.6406	44.7555	22.3873	45.2921	21.5015	97.4466	96.2526
C19orf48|84798	119.329	63.1738	174.622	176.962	55.2169	99.5414	91.2175	83.8652	723.39	126.531	116.147	368.765	204.32	66.0609	64.0071	244.491	201.412	112.363	321.205	628.822	223.495	244.547	258.969	134.548	60.0313	251.461	109.082	116.524	101.386	125.452	78.4125	117.811	81.4882	118.71	297.746	138.788	181.481	92.6336	489.786	77.2258	106.215	82.4226	127.897	217.696	237.632	92.7299	45.7979	137.001	127.793
C19orf51|352909	0.497738	5.61086	35.9262	27.0367	21.038	8.27828	12.4543	16.4887	1.47059	19.4285	4.14027	49.2516	1.59276	0.113122	15.2833	0.20362	3.63484	2.99367	0.831222	6.35294	1.60633	13.8471	9.83891	8.61493	6.53213	3.08914	28.4036	24.2851	34.6276	6.4362	11.738	13.7557	19.0552	0.542986	5.11629	21.9027	1.78733	1.3638	0.701357	16.6968	0.294118	15.9579	6.08371	5.13213	13.8977	12.4023	7.20995	25.7457	16.5312
C19orf59|199675	0	0.301659	0	0	0.366516	0.113122	0.0723982	0.829563	0.0874811	0.678733	0.226244	0.301659	81.0897	0.0754148	0	0.445701	1.16893	0.0754148	2.93741	0.226244	1.85294	0.0754148	0.678733	0.603318	0.452489	1.15686	0.0754148	0.829563	0.15083	0.451735	0.960784	0.226244	0.301659	0.603318	7.24133	1.35143	2.60181	1.69683	1.98492	0	0	0.15083	2.5641	1.24434	0.15083	0.528658	0	0.57089	0.377074
C19orf63|284361	254.725	227.579	358.771	261.705	244.309	447.734	215.762	575.648	497.314	598.448	161.822	712.436	668.266	247.171	186.778	523.521	556.989	99.744	624.163	311.685	394.492	569.977	447.29	494.196	144	164.157	268.757	623.701	384.164	243.548	388.739	232.357	231.32	144.741	399.571	491.723	242.969	228.043	585.119	179.125	226.235	444.624	434.819	346.742	322.709	380.277	189.995	387.11	409.611
C1QL2|165257	0.195217	0.0976086	0.561249	0.0488043	1.1713	0.68326	0.268424	0.0351391	123.601	0.0488043	0	0	61.4187	0.0976086	0.292826	0.286481	6.02343	0.0483163	16.7613	24.859	0	0.389458	0	1.63934	0.195217	71.795	0.414837	0.0610054	0.0976086	0	0.00585652	0.463641	0	0.0488043	0.275256	0.918985	0.536847	0.239629	1.53636	0	0	0.16203	0.146413	0.493899	0.0488043	0	0.195217	0.0488043	0
C1QTNF1|114897	17.3312	41.875	46.3545	20.7193	21.6992	193.137	71.9848	93.3686	57.911	112.709	26.0113	14.7906	79.1299	13.572	39.5487	135.089	52.7532	11.0473	39.1038	28.584	81.9322	38.9319	30.3881	30.9912	38.6225	26.5968	68.8072	44.2571	71.9329	19.8736	134.702	26.1822	9.00353	31.1518	11.7246	80.1081	32.6596	18.0681	73.0597	8.50989	19.2172	61.3407	117.55	71.4707	40.47	56.6091	43.5745	12.0738	52.8008
C1QTNF6|114904	11.5208	81.4834	141.493	38.3933	60.0073	400.316	191.615	49.2489	27.8856	180.377	95.0901	16.7524	48.2754	11.9089	101.481	44.9329	67.1911	44.9578	21.1732	44.6364	140.775	98.9409	71.7974	178.597	155.75	59.762	112.665	72.9217	202.483	30.2262	76.1188	75.7534	59.7198	44.3042	45.6511	178.321	30.3029	75.153	65.4058	40.8898	36.3026	140.432	156.649	114.893	59.8668	64.1371	30.9173	20.2834	71.8198
C1QTNF7|114905	0.502569	3.71901	3.8977	0.569578	3.94237	12.2765	2.52803	1.54121	0.0670092	1.45187	1.30668	0.312709	0.293053	0.569578	7.5832	1.04088	0.595265	0.385526	1.21733	0.0670092	2.98816	0.692428	0.443601	1.03864	0.502569	1.07215	3.75251	0.490284	0.271164	4.04847	5.6654	1.2285	0.357382	0.68126	0.0223364	3.7476	0	0.214653	0.313379	0.402055	0.2457	4.02747	4.30958	3.26067	0.402502	0.995086	2.55037	0.279205	1.50771
C1QTNF8|390664	0	0	0.00440399	0	0.02936	0	0.00557839	0	0.00469759	0	0	0.00469759	0.00910159	0	0	0.00381679	0.01468	0	0.0114504	0	0	0	0.00440399	0	0.00469759	0.00675279	0	0.00616559	0	0	0.0525543	0.0587199	0	0	0	0.00469759	0	0	0.00792719	0	0	0.00587199	0	0.013212	0.0211392	0.0346447	0	0.00440399	0
C1orf112|55732	12.5752	16.1985	64.8282	19.2158	15.5462	17.7485	57.6338	37.2305	66.3353	42.9906	27.6474	75.3199	46.5124	25.015	16.5966	23.9053	41.5004	36.7549	82.0214	16.6981	21.5466	18.6128	18.0259	29.5188	22.5519	36.3278	8.25677	28.0436	27.6684	43.3372	24.432	28.8598	40.0613	31.9041	23.3015	8.71053	15.3421	27.6883	38.382	40.6278	39.4774	50.6707	29.6944	21.5305	27.7835	40.1729	15.3504	39.9951	31.0008
C1orf115|79762	49.1355	43.5739	129.588	15.3953	11.0823	90.5766	158.035	34.6619	116.869	135.695	42.2448	87.8813	50.8197	267.993	38.7642	73.8368	94.696	25.2983	30.4957	31.9344	25.3191	107.538	92.8886	131.535	26.4679	9.47993	24.1592	137.645	19.7542	13.9689	21.2967	147.684	59.1054	27.3037	34.0625	112.834	61.2054	139.683	146.755	113.848	21.1505	192.769	108.629	73.103	119.134	134.438	82.6124	33.1732	14.7264
C1orf125|126859	0.195236	0.117142	0.409996	0.136665	0.449434	0.0390472	0.390863	0.161265	0.352597	0.175713	0.21476	0.117142	0.42952	0.0976181	0.195236	1.59	0.125732	0.159703	0.136665	0.64428	0.21476	0.0195236	0.0613042	0.507614	0.234283	0.175713	0.0390472	2.69426	0.64428	0.409996	0.531433	0.175713	1.44475	0.17376	0.136665	0.0976181	0.0390472	0.0390472	0.178446	0.509957	0.370949	0.411168	0.411168	1.42874	0.525185	0.531824	0.0976181	0.370949	0.590394
C1orf127|148345	0	0.176835	0.15473	1.83466	0.15473	0.353669	4.49735	0.405393	1.74624	0.824934	6.00486	0.198939	0.557913	0.309461	0.287356	1.59461	0.793988	0.132626	0.82847	0.486295	0.488506	0.397878	2.84748	37.7865	0.4916	0.442087	0.15473	5.9748	0.707339	0.221043	0.158709	3.44828	2.98408	7.38285	0.263926	0.430592	0.265252	3.35986	0.29664	0.66313	0.176835	0.552608	0.751547	0.37931	4.29664	0.221043	0.221043	0.606101	0.198939
C1orf130|400746	44.6916	3.74096	7.42246	2.58487	1.3706	4.43233	1.94106	4.62712	66.6759	2.48773	3.57399	17.7066	28.2284	1.34935	2.21882	16.0119	7.66633	2.12345	27.4941	14.2031	4.3018	3.88034	2.53681	6.45282	3.12117	7.27802	3.48217	7.92133	0.994182	1.66431	7.1323	5.91171	1.42044	1.23956	29.3878	3.88085	1.98482	2.7192	18.4834	2.33949	2.1829	4.0554	3.75866	5.52542	2.74804	4.14748	9.10751	11.5669	2.34607
C1orf131|128061	19.9657	30.8365	67.5195	31.103	14.9489	42.1608	48.9596	50.8102	36.039	81.3042	41.79	85.4482	65.969	31.924	26.2685	46.8075	67.7503	43.5935	119.967	64.753	39.7093	18.5128	36.3486	30.8035	32.2638	47.2369	19.5141	96.4603	42.3472	36.0485	27.9044	42.6178	51.1487	87.3001	39.3964	26.1575	61.969	35.8459	86.4139	81.2335	60.0195	70.2005	67.3008	53.8546	66.7039	35.3896	25.0828	108.369	45.8371
C1orf135|79000	4.31393	4.38622	8.96749	6.69141	9.43959	2.09995	7.49636	10.4745	43.2974	10.7089	11.0398	23.818	41.7021	3.55022	4.94081	18.0786	16.3542	8.03639	31.2737	23.1218	15.4474	23.3964	16.0063	27.8161	10.7652	23.5687	3.16012	13.608	7.64629	2.69481	14.1014	2.95973	15.5459	12.6458	10.6584	2.72926	29.6977	28.2698	30.8627	6.46288	15.4692	8.48035	5.68656	2.41485	9.41824	14.9495	2.90344	7.06938	22.1451
C1orf170|84808	0.587682	2.56229	5.03056	4.98354	7.45087	3.1528	1.69252	5.99436	0.611189	10.7409	1.9276	0.923366	12.1598	2.70334	6.56229	3.83545	3.00893	2.00282	4.80489	0.188058	2.45463	5.26563	7.1984	33.8232	2.08839	10.6168	12.8999	9.62435	3.17348	2.06864	2.53032	3.10296	4.91302	2.2567	10.1913	6.32346	4.37236	4.26187	2.73719	5.43018	2.98543	3.19699	2.09215	4.07287	6.33004	2.02022	2.56229	0.658204	3.73766
C1orf172|126695	31.1725	38.4812	76.0706	35.2874	70.9507	45.135	43.0331	86.9513	106.282	55.0443	31.9176	56.6112	120.109	62.1098	51.8443	61.5199	56.2179	28.2028	121.777	92.9238	93.6835	43.4902	82.9714	94.9328	17.0812	84.13	54.7602	104.173	46.377	60.4975	72.8235	54.8106	35.4672	39.5597	92.9776	53.1216	46.3765	96.0812	67.13	88.4627	61.3647	88.9042	30.5569	74.7894	77.7137	66.5261	34.9625	69.6241	58.8812
C1orf173|127254	0.227519	0.411701	2.17768	1.25677	4.97248	0.0216685	0.238137	0.422535	0.292524	0.433369	0.975081	0	0.686674	0.552546	11.8754	0.150813	0.368364	0.0216685	0.130011	0	0.140845	0	0.199783	2.71246	0.379198	0.0589382	0.628386	9.64225	3.73499	0.118093	31.4397	2.32373	2.32481	0	0.682557	0.258288	0.0650054	0.00476706	0.278657	4.67671	4.34171	16.9573	2.11094	1.47346	0.15623	13.2091	11.7443	0.671723	2.0143
C1orf182|128229	0.493056	2.22743	7.37674	3.21007	4.86111	2.77778	5.9184	1.96875	7.59375	3.37674	1.37153	7.69618	5.43229	1.38889	2.80035	15.4271	7.47743	4.6875	3.75347	8.49132	2.94271	2.75347	2.27257	4.3125	1.82292	11.5521	1.82292	23.2708	11.4462	6.83333	2.99306	3.80208	10.9132	7.17882	4.12153	4.74306	2.69097	9.32118	2.68056	16.5434	3.45486	6.11632	4.71875	3.90625	1.38889	1.98611	1.64931	3.81944	2.5
C1orf183|55924	4.59286	4.10258	7.55807	1.90962	3.44013	7.24627	10.4234	3.47718	16.2756	6.12291	3.91685	10.5355	10.8599	5.94216	2.73159	3.09309	2.8667	2.26435	9.65657	2.48531	3.56981	5.8441	7.07185	10.765	4.12201	2.11116	2.41753	4.9164	1.8075	5.70538	8.52056	3.41166	2.01085	4.76728	2.23	6.50068	3.56981	3.23452	2.83597	2.39494	5.78174	9.07366	7.90465	6.00994	3.84004	7.22729	8.32806	8.74108	3.54722
C1orf185|284546	0	0	0	0	0.0548847	0	0.164654	0	0	0	0	0	0	0	0	0	0	0	0.109769	0	0	0	0	0.0208562	0	0	0	0	0	0	0	0	0	0	0	0	0	0	0	0	0	0	0	0	0	0	0	0	0
C1orf187|374946	1.51946	1.39989	2.93119	1.23858	0.865764	1.11168	0.479413	1.04343	30.8804	0.338409	0.169205	2.58319	8.23914	0.36661	0.451213	1.5533	1.32262	0.225606	1.31077	6.54597	0.423012	0.197406	0.338409	0.0676819	0.282008	1.9797	0.662719	0.364918	0	0.479413	2.90412	0.620417	0.36661	0.667795	0.759165	1.21658	0.169205	3.79752	0.310209	0.282008	0.112803	0.620417	0.478849	1.15059	1.43316	0.282008	0.731528	0.282008	2.32318
C1orf190|541468	2.78476	3.38647	4.59313	1.94149	1.88352	5.4525	2.16532	3.34675	3.15566	3.85776	1.29039	1.51476	2.9066	1.67311	2.9694	2.19807	2.38862	1.81052	2.13205	1.8497	2.98175	1.40687	1.95598	4.23994	2.56522	2.01557	3.3956	4.86312	1.54267	5.47504	2.73752	7.6205	0.912507	1.87869	1.57005	5.17767	0.993022	1.50671	4.21578	1.94525	2.42566	2.56468	3.92002	4.77456	2.42941	8.46484	4.61353	6.10789	3.08159
C1orf194|127003	0.535168	1.29969	1.91131	6.65138	10.5505	0.688073	3.81346	7.1789	11.2462	1.66361	1.29969	5.96483	0.458716	1.75841	8.86544	1.29969	0.840979	0.30581	0.382263	20.263	2.37003	1.6055	2.21713	4.16208	0.688073	0	2.51835	41.6483	26.9572	1.29969	4.31804	22.1789	3.59327	0.30581	1.75841	1.29969	0.611621	4.57951	1.14679	2.9052	2.96942	0.993884	3.73242	1.20642	1.52905	3.43272	0.993884	6.80122	0.978593
C1orf210|149466	22.5217	27.7532	107.811	44.0167	50.0301	51.9104	33.1753	34.792	53.6542	121.961	30.6689	59.1706	21.7926	53.9264	37.8047	53.103	19.1197	19.5385	49.4375	20.0883	41.6582	33.0963	68.5585	43.8375	23.0207	20.0515	29.3231	108.765	32.5739	37.1097	54.3987	45.1987	26.9378	16.0555	17.5251	37.105	25.6408	37.806	52.0997	66.0274	67.9679	75.5244	29.9425	43.3418	38.5411	110.514	38.8348	90.81	66.7746
C1orf230|284485	0	14.0276	3.20856	4.50089	0.178253	1.06952	3.25312	1.47059	2.16667	7.35294	0.490196	0.26738	0	0.00623886	1.60428	0.356506	0.0891266	0.668449	0.0891266	0.26738	1.91622	1.51515	42.7807	8.8369	0.490196	0.0445633	0.623886	4.76827	4.90196	21.4795	0.534759	1.85561	5.97148	4.53119	10.7843	0	0.178253	0.534759	0	2.62923	0.980392	2.13904	2.49554	0.980392	1.11408	0.26738	0.0891266	11.582	1.11408
C1orf31|388753	40.8019	97.6321	212.45	138.808	64.6777	130.888	101.582	225.225	87.2107	286.448	119.472	212.709	124.088	78.2987	108.385	354.934	248.73	136.335	205.55	585.682	172.947	98.8208	176.91	96.6289	61.9497	150.088	66.4827	491.23	136.572	270.009	99.3774	106.454	152.657	173.492	253.539	135.132	401.239	113.597	555.646	144.94	107.242	240.896	138.211	166.53	246.786	107.753	66.3774	163.936	127.044
C1orf35|79169	21.281	33.5533	88.0937	37.6441	31.3761	41.3854	53.0706	90.4474	53.8293	107.14	37.4481	76.2478	74.7572	30.4878	28.4496	98.4899	93.861	46.2017	141.484	221.559	59.8804	40.2846	48.366	51.049	22.2183	83.8537	38.3573	152.124	46.6499	33.9143	57.7305	43.2061	64.8393	51.8927	72.2673	42.7594	70.6477	69.4157	116.91	53.4964	61.7154	71.3458	70.2723	67.8336	48.013	35.0829	17.6873	75.9035	48.7983
C1orf43|25912	276.406	967.215	1466.46	445.41	468.26	461.734	588.21	889.792	1197.29	1998.19	733.198	1164.61	951.826	790.376	390.486	474.976	1157.24	941.779	1667.43	981.067	1196.45	634.067	2067.09	1360.32	357.961	794.275	406.434	1332.19	687.881	1595.74	852.1	890.347	733.968	834.421	826.667	614.087	508.899	704.524	884.211	1329.71	1048.2	1531.03	895.107	1005.29	550.056	1110.27	411.87	1829.45	783.633
C1orf53|388722	3.14921	1.50646	4.20373	4.3056	3.80201	3.84935	8.01578	9.58537	8.93974	6.93544	20.1004	28.9527	25.6844	7.26829	3.72453	23.8149	18.2339	8.52654	12.6055	8.5165	7.75036	10.3601	2.64706	41.1607	5.61119	5.06743	5.32999	65.7174	17.3429	3.49498	12.8235	4.97991	14.4562	8.5208	25.2927	9.86083	14.7432	1.49211	2.85653	23.7116	12.6973	22.4075	6.71593	5.95409	1.25538	3.49641	3.69154	2.23242	14.2511
C1orf74|148304	20.2296	10.8733	33.9342	11.7795	8.85993	18.2205	28.6468	19.4762	21.3015	31.6663	8.07125	51.9781	57.1041	15.3264	9.55481	14.2326	57.796	18.5018	55.419	60.9659	13.4829	10.3337	7.84348	23.9616	10.4525	19.1188	9.6754	31.444	19.9957	26.3252	19.2065	16.81	26.5451	26.327	16.539	11.0518	15.687	22.799	30.4921	38.6468	16.6291	39.106	16.6218	19.6681	15.0219	21.6516	12.3356	37.1535	19.0932
C1orf93|127281	32.8539	67.9118	163.957	79.5603	138.058	50.0164	68.127	169.621	160.849	131.702	58.3295	90.5764	127.581	118.238	107.953	82.3612	53.7303	45.5174	92.9466	237.702	136.855	349.615	136.198	323.864	76.6496	99.344	192.803	194.105	72.1106	116.468	162.678	76.5409	74.7396	29.1685	101.139	109.953	67.5831	103.244	16.5786	111.101	149.623	121.114	62.3422	110.842	167.18	283.293	50.4288	70.1946	190.016
C1orf95|375057	2.23455	3.88883	1.03738	0.609089	0.254581	0.595407	0.379428	37.5023	1.99585	1.3611	58.6775	0.366724	0.920108	0.266553	0.264354	0.253359	0.545321	0.434156	23.7987	1.72881	2.55412	0.0366479	0.146592	0.438065	1.05497	0.554117	1.08624	0.452968	0.299047	0.24432	542.781	0.713902	38.2861	3.22526	0.12729	1.98876	0.207672	0.0488639	0.342536	0.0583924	2.25312	51.6626	10.1285	1.04153	0.679208	9.76106	2.58832	0.229905	0.012216
C1orf9|51430	84.1411	104.072	179.429	48.5863	37.7601	81.8872	121.327	85.5532	87.5489	221.375	163.588	183.477	97.7896	90.6034	32.4169	53.1152	96.0153	140.529	179.517	29.4926	68.4481	114.219	111.533	103.923	51.6569	64.3685	25.5679	138.263	60.7577	196.426	100.495	73.6442	123.809	140.232	37.5699	68.4437	26.204	94.3994	26.4031	154.15	124.777	180.942	110.905	139.907	47.8751	145.755	77.2831	219.884	85.9755
C20orf103|24141	14.7782	95.2736	107.409	57.202	29.4761	124.313	32.2899	54.4505	8.9057	42.8836	63.0215	1.74622	26.8359	16.202	56.539	49.0576	37.6746	59.6409	3.2596	9.02154	34.2084	50.3062	13.8097	22.326	27.7753	12.7328	68.1717	26.3871	48.2061	33.0722	48.89	135.476	25.4657	24.8545	3.05588	58.6304	0.72759	20.4051	8.02794	22.9075	21.415	117.072	86.5076	170.687	17.6601	31.2008	41.1211	9.71653	44.3126
C20orf114|92747	10.7119	10.7202	177.123	30.6656	257.877	171.271	15.6747	512.219	4.06291	726.856	21.1267	2.26738	1.29056	43.1656	70.4305	1.63825	6.75745	29.2161	1.7707	1.39321	103.274	6697.81	6642.19	52.3452	2.47185	1.04139	7.97185	39.6407	37.2906	32.6134	58.4114	2.88411	412.079	12.4462	1152.36	225.959	2.28228	3.75993	2.0447	2.42219	47.6151	43.4172	91.9503	73.995	5.38245	2590.77	17.0273	17.7856	85.4131
C20orf134|170487	2.86834	3.84221	4.22633	5.86933	5.00789	6.18195	4.68935	9.61686	2.64546	6.46351	12.5158	8.81509	8.56262	2.59517	2.28304	2.23866	5.57002	2.46351	4.1716	3.0572	3.3925	6.43146	37.2249	13.4911	4.81854	9.06213	3.23176	16.1272	11.8042	11.2559	3.99901	8.98274	6.12229	1.28156	17.0108	3.63067	1.89349	5.9571	2.0143	3.7214	3.32988	4.62623	5.44477	3.44083	5.31953	2.8432	1.90878	13.2653	12.215
C20orf151|140893	6.49803	9.9241	14.2864	10.3792	8.46151	12.2266	9.68493	6.39599	20.6917	17.9327	11.5922	25.2578	13.1883	9.29216	10.8632	29.3434	7.28428	8.6613	23.2216	21.3448	21.9291	10.2488	18.0172	15.556	6.94773	8.61511	7.72574	35.4121	11.5632	9.79842	16.5342	9.95883	21.068	8.90333	13.5625	9.84748	10.705	14.1672	5.07232	18.8034	15.5926	8.44003	4.83244	8.8976	15.8887	4.28715	2.57429	0.733978	9.99749
C20orf160|140706	1.90242	10.2086	10.286	6.82229	7.18308	5.59132	4.35855	11.4221	24.043	9.6137	4.39705	9.65264	15.0354	4.48791	4.54208	7.25604	5.5658	2.48568	2.85989	4.5188	7.66562	4.18174	9.07117	9.94091	7.1231	3.22695	8.68084	5.86347	4.34199	7.81916	10.2592	8.85407	12.6119	9.28066	5.3393	12.8035	1.09669	11.8559	5.3308	2.97672	6.58863	6.86885	19.2583	8.01791	5.58818	4.74038	5.53984	4.33662	3.58908
C20orf194|25943	20.8273	21.2488	22.0887	8.25436	12.9345	27.3407	17.0223	20.4376	9.11173	20.4312	10.3708	17.2506	14.5924	7.10808	13.2155	11.4136	17.2712	4.71727	10.8745	7.07448	17.5249	8.98146	12.0368	18.916	21.7593	21.3111	12.3128	13.0046	10.6577	7.84358	19.8349	21.2789	5.80745	7.46276	9.56339	19.6295	5.27734	8.85895	15.684	18.958	6.51347	19.7967	29.9699	19.2491	12.3247	24.5973	28.12	24.0518	13.1423
C20orf20|55257	29.566	53.2628	51.8559	32.314	26.44	42.5636	43.0313	300.468	94.915	88.2242	32.5895	68.2725	111.84	76	30.8421	89.8535	79.5401	72.2146	92.1989	68.9253	60.5497	52.8794	86.9711	92.487	91.8734	128.155	33.0856	83.5274	58.6835	37.5027	50.5184	42.9048	237.027	49.3816	88.8439	44.4515	160.32	56.7601	225.652	30.4057	63.8909	39.6004	51.2423	55.531	78.4605	43.8047	27.9566	101.444	68.3876
C20orf24|55969	93.5046	297.288	296.67	223.73	213.679	278.839	347.274	881.771	420.541	360.864	277.322	633.099	556.09	135.345	172.822	440.425	789.22	322.139	574.499	1141.83	303.903	749.932	490.627	430.8	351.521	563.701	166.458	361.113	300.761	659.403	376.515	274.858	577.278	479.182	364.082	221.181	761.461	324.669	753.849	174.724	371.788	281.962	332.079	336.879	383.048	297.092	139.141	343.566	601.424
C20orf26|26074	0.293021	3.57805	8.4976	5.54076	5.26745	3.5333	2.76292	1.22536	1.62493	5.16782	1.28769	0.571657	2.82365	2.0943	5.29835	0.217368	0.700053	1.54502	0.45285	0	16.6873	1.41183	2.23548	0.905701	0.372936	0.426212	3.54235	8.91795	8.187	10.5328	12.4065	9.42994	0.882792	6.44166	0.186468	2.5951	0.186468	0.879062	0.319659	11.5333	9.80021	4.32072	1.11614	3.54289	3.91742	3.94992	2.7171	62.577	6.65903
C20orf54|113278	23.7762	48.6124	17.6431	38.0099	25.954	43.7139	41.8362	24.404	8.06676	15.5215	13.1778	69.3539	4.85354	25.9162	29.4421	51.0691	16.592	23.8648	9.38215	68.8849	38.3709	10.0048	33.1962	51.5766	49.5221	11.8055	19.4915	125.827	53.3266	33.1301	91.8559	39.1689	85.3123	41.2861	27.9414	23.5381	11.0368	26.2793	5.74489	31.1134	71.8696	38.6277	124.952	72.8774	41.0198	38.4966	27.3062	1.34537	87.968
C21orf15|54094	1.20344	1.21674	0.273865	21.007	4.60016	2.37872	0.555556	2.78717	0.156495	7.78169	1.64006	0.156495	0	2.37324	27.2308	0.43036	0.899844	16.2496	0.230047	0.0782473	18.1581	0.391236	34.5078	2.8795	19.1049	0.234742	1.95227	3.86463	10.5094	0.231612	2.35915	0.743349	1.75039	0.0782473	8.09859	0.508607	0.0782473	0.586854	0.508607	1.03834	8.1651	8.13146	23.2418	9.58216	1.17371	1.51174	5.49061	2.22692	17.4147
C21orf34|388815	4.41821	4.43465	6.02937	3.74626	1.53833	10.669	5.50925	3.54949	1.62996	3.88311	1.34068	5.20117	1.57004	0.762115	2.97269	11.6282	3.68957	1.13363	1.38032	0.587372	1.04112	6.10866	1.03818	2.34479	2.49604	0.514831	4.06373	1.08664	1.62379	1.56652	1.38855	7.26314	0.677239	1.54126	0.0881057	5.52687	2.49838	3.92834	3.56769	0.866373	0.640529	2.38473	6.17239	5.94949	0.895742	0.914537	8.17827	0.367107	1.66167
C21orf45|54069	35.1521	51.2498	90.6535	52.6645	39.0313	58.4442	95.3392	113.741	243.274	81.2525	48.6249	221.215	115.937	25.7069	57.5041	45.5189	100.567	67.7143	67.3668	169.182	81.6157	68.3862	111.344	105.3	46.0074	111.491	33.9604	78.3889	85.7871	103.057	79.7567	62.2783	90.0627	78.8636	84.1963	40.1336	129.581	113.48	159.337	53.976	84.5604	57.8737	65.3512	75.3871	142.395	90.7502	35.4839	55.9438	71.0876
C21orf58|54058	6.79406	7.61571	10.0331	6.45265	7.60297	7.45945	13.5851	15.242	57.3962	17.9367	3.47643	75.8064	17.1087	6.6879	6.9087	41.6764	12.4943	14.9427	25.7877	21.4437	19.0433	8.84883	29.7652	46.0535	6.52399	23.5766	6.73036	29.3469	9.93461	14.4068	31.0913	5.07431	110.224	6.53673	6.55456	4.78556	9.06412	17.713	13.8616	7.07856	26.4378	5.49045	10.8374	7.78769	36.228	22.589	3.66285	21.473	14.8382
C21orf94|246705	0.0754717	0.171527	0.32247	0.0857633	0.320755	0.51458	0.25729	0.200686	0.428816	0.744425	0.0857633	0.286449	0.25729	0.0857633	0.343053	1.0789	0.51458	0.25729	0.586621	0.533448	0.51458	0.209262	0.475129	1.02058	0.343053	0.25729	0.123499	0.969125	0.0857633	0.25729	0.25729	0.343053	0.600343	0.156089	0.51458	0.42024	0.0857633	0.590051	0.343053	0.25729	0.343053	0.25729	0.835334	0.668954	0.171527	0.428816	0.600343	0.667238	0.171527
C22orf23|84645	43.3045	7.82882	15.9614	4.49932	5.22395	10.1922	3.50474	6.02165	35.0074	7.12991	2.77402	18.8775	46.2815	2.16509	5.6184	6.22124	9.65765	3.17997	23.0981	19.5115	8.21313	3.01083	4.15426	6.42896	7.45535	10.8254	5.43978	14.615	5.17591	8.05007	11.7903	13.0244	2.0636	3.17997	2.79973	13.7564	10.247	12.9364	57.3945	8.08525	6.08931	10.1989	7.27334	10.6827	6.31461	19.7747	15.1793	11.795	9.66712
C22orf41|644186	2.53456	4.26267	18.5484	7.94931	2.90092	22.8433	2.07373	2.88018	0.460829	11.629	3.22581	2.74194	4.95392	3.68664	4.37788	3.1106	2.18894	0.921659	7.47696	1.03687	6.2212	4.26267	10.4724	1.4977	0	1.6129	4.37558	61.9585	10.023	10.4839	52.4078	7.60369	9.3318	8.98618	1.6129	2.29263	0.115207	3.57143	0.576037	38.2258	0.691244	12.4424	9.10138	13.8249	3.34101	6.45161	3.1106	0.460829	2.18894
C2CD2|25966	14.8974	41.9546	28.9491	19.6392	32.9386	23.8005	21.7065	43.3697	23.1362	26.9601	20.792	37.8255	28.3703	2.93767	18.7811	43.585	48.156	25.9793	28.3881	24.6956	18.281	28.2846	13.6946	37.3081	41.1847	37.7747	20.6737	59.6524	25.7868	26.4269	70.8142	12.3206	17.5596	9.73179	11.4618	37.5581	16.9362	35.3626	19.5544	9.23419	65.0907	21.6142	69.4103	26.5877	34.4988	25.5808	34.1113	53.5402	18.5574
C2CD4B|388125	0	1.73985	1.09962	0.507614	0.377538	0.920051	13.1434	0.595812	4.72525	0.317259	1.3382	1.6047	0.822335	0.253807	1.66815	8.53871	1.2868	0.248096	0.605964	0.380711	1.4118	66.1504	0.628807	15.9245	3.39657	1.28744	2.14404	2.54822	4.68464	0.380711	6.22462	9.20305	0.0317259	18.3902	2.14784	1.70558	1.38642	0.739213	0.856599	1.14213	0.951777	4.14277	11.4511	1.14213	3.37754	1.88832	6.22906	0.494924	1.1085
C2CD4C|126567	0.256722	1.48624	0.508963	0.608195	0.192061	0.515685	0.377721	4.48656	37.5944	8.70839	3.22535	0.960307	14.1754	0.543214	0.350192	1.06754	0.484315	0.260563	0.382522	0.540013	2.27145	2.17606	0.495198	1.0765	2.43246	0.144046	0.415813	0.679257	0.496159	12.1364	1.08515	0.126761	1.08835	0.509603	5.89213	1.01697	0.128041	61.5797	0.101152	0.192061	0.350832	1.23239	0.976312	0.505122	28.6754	0.714789	1.04001	0.448143	0.879641
C2CD4D|100191040	5.04028	4.13719	4.59895	2.9568	1.77875	1.59895	3.04437	2.90193	4.05137	4.97023	0.466433	14.195	6.60595	2.6439	1.22242	6.49912	5.53006	0.963222	18.4431	20.9305	1.49912	2.8021	2.37595	4.36252	0.690018	9.1547	0.920607	6.20315	3.94162	7.25919	2.01401	3.28722	2.29947	2.07356	11.784	1.38587	3.46235	1.46643	4.19089	4.46877	1.50555	3.4063	2.53065	1.69586	0.956801	1.53123	1.3164	1.32341	1.87507
C2orf15|150590	11.3769	21.0378	38.3287	16.7685	18.528	36.0685	15.3469	36.3818	32.7979	20.4545	12.8063	55.3182	31.0692	24.1902	22.2259	13.0937	8.79091	24.1406	34.8559	29.4685	38.1483	18.0951	27.7825	28.3476	25.6657	9.70629	23.4203	64.128	28.8657	22.1748	25.6671	15.0916	33.6469	10.5741	25.6692	20.5217	23.2937	24.4084	11.235	28.9098	33.9916	36.1406	19.7434	24.2147	28.5301	49.7615	11.2392	41.6469	35.807
C2orf40|84417	581.137	19.2623	112.77	42.0492	2.31652	31.0126	3.31652	20.1387	70.1778	4.16141	2.38714	3.46784	7.97604	3.64187	5.77932	0.822194	27.2409	8.65952	54.4641	17.2131	1.98739	0	1.00883	14.2459	8.17024	0.504414	19.348	3.83354	5.04414	4.40605	15.3253	54.8134	2.01765	3.07566	0.868852	49.9105	72.8575	1.41362	30.6545	2.24716	1.89029	7.94325	4.53972	41.9105	0.441362	7.25095	117.907	0.630517	1.38714
C2orf48|348738	0.827024	1.18297	0.98265	0.315457	0.236593	0.0788644	1.03102	0.788644	8.68822	1.56257	0.394322	6.17192	0.473186	1.26025	0.473186	2.58991	1.11882	2.02419	2.15983	3.41377	3.10147	0.341746	3.60515	1.16719	0.341746	2.25342	0.157729	1.05152	0.0788644	0.933228	1.67087	0.210305	0.867508	0.542587	0.714511	0.159306	4.77918	4.25026	9.9143	0.315457	6.26393	0.53102	0.578339	0.378023	2.55152	2.24027	0.125131	1.69979	0.814932
C2orf54|79919	0.669311	0.892414	6.70798	38.0223	41.4031	15.5464	88.1978	6.7645	47.3649	1053.22	74.0436	0.223104	75.8528	10.2509	8.66485	0.991572	5.58007	0.279623	1.27814	1.73277	0.198314	909.297	2.85077	99.1388	1.95835	7.49033	20.7005	1.69807	0.842836	1.09073	0.6941	1.55231	26.5578	16.9113	3.97025	42.3728	8.50372	62.005	32.652	0.867625	0.401091	9.71096	2.14328	2.03619	5.39415	1.68418	4.11502	0.322261	1.09073
C2orf58|285154	0.454026	0.742433	1.12564	0.713878	0.342661	1.19246	0.314106	0.656196	0.277556	0.885208	0.226728	0.11422	0.928041	0.171331	0.599657	1.19931	1.67047	0.11422	0.456882	0.314106	0.564249	0.765277	0.371216	0.443746	0.770988	0.194175	1.02798	0.11422	0.0571102	0.285551	0.885208	0.571102	0.0571102	0.913764	0.484866	2.24672	2.72987	0.171331	0.199886	0.300971	0.542547	0.332381	1.12564	1.85551	0.256996	0.371216	1.56882	0.334666	0.16562
C2orf71|388939	0.150625	0.0141965	0.136286	0.0455707	0.00326519	0.028393	0.0141965	0.0425894	0.0238501	0.0141965	0.00709824	0	0.642959	0	0	0.400057	0.0668654	0.00113572	0.0425894	0.0870244	0.0141965	0.00709824	0	0.0222885	0.0291028	0.183844	0.0141965	0	0.0141965	0.205849	0.00411698	0.028393	0	0.0143384	0	0.184554	0.0496877	0.00298126	0.0262635	0	0	0.0261215	0.0293867	0.163401	0.00354912	0.00156161	0.028393	0.0141965	0.11414
C2orf82|389084	7.25	0.9375	95.6708	1.97292	0.614583	1.45833	1.9	1.875	0.729167	4.13542	0.9875	1.66667	202.579	0.875	0.904167	16.875	3.25208	3.93958	1.35417	3.68125	0.520833	1.35417	0.520833	1.7875	2.91042	0.3125	32.3062	1.07708	0.520833	1.30417	1.29167	5.00833	0.729167	0.810417	1.5625	11.5104	0.4375	1.73542	5.7125	1.04167	6.79167	0.104167	3.0375	4.05625	1.48958	0	8.28958	0.625	0.395833
C2orf84|653140	0.718135	0.751295	0.621762	0.259067	0.284974	0.803109	0.207254	1.63212	0.310881	0.788083	0.278238	2.39016	0.673575	0.15544	0.284974	0.680829	1.07513	0.21399	1.19171	0.388601	1.5544	0.492228	0.836269	1.03627	0.699482	0.569948	0.984456	1.01036	0.362694	0.751295	1.09534	0.466321	0.259067	0.233161	0.336788	1.85907	0.15544	0.344041	0.725389	0.233161	0.181347	0.758031	2.48705	1.14715	0.233161	0.635751	0.388601	0.492228	2.5829
C2orf88|84281	72.3598	2.85198	8.92923	2.65387	1.83578	2.74657	2.01844	3.36506	1.5998	1.01072	0.822327	26.1899	3.7847	0.535759	1.55744	14.8619	40.8467	1.60977	8.91976	15.3501	0.697732	1.25841	1.61999	3.24122	3.25193	1.45776	2.9529	1.07227	0.347869	3.30027	1.21131	4.26115	0.859706	0.722651	0.074757	9.66609	1.33317	0.361326	2.69449	0.909544	0.970596	1.81037	4.87167	6.3531	2.89061	1.53127	7.92425	1.42238	2.06828
C2orf89|129293	0.325998	2.79136	1.85982	1.52608	2.13936	3.2172	1.94825	3.07457	0.794621	2.44499	1.52812	0.996333	5.94947	0.855746	1.46699	3.72494	7.17971	0.617767	3	0.672372	2.10839	1.50774	3.8586	5.0436	8.96496	3.14874	1.20049	1.37531	1.15852	0.609209	1.91972	1.26324	1.68174	3.63488	0.590872	4.34108	5.36512	1.05949	4.78566	1.10024	0.692747	0.930725	9.56479	2.99307	9.06275	1.35493	3.70619	2.04768	1.46699
C3orf14|57415	41.2861	115.184	218.218	51.0925	164.423	96.5745	94.5012	182.155	246.714	312.609	152.816	320.364	99.7103	112.696	283.327	10.3966	139.252	44.8317	139.013	68.6899	184.769	191.2	435.706	188.281	52.0433	11.238	132.183	179.627	182.591	134.51	60.4567	261.684	173.798	148.017	116.707	98.0024	73.3173	212.962	125.07	186.977	74.1587	153.185	196.173	288.284	368.272	114.017	152.099	6.92188	223.436
C3orf36|80111	0.0594177	2.5918	2.10933	0.475342	0.415924	1.60428	1.06952	2.91147	0.237671	4.99287	1.62923	0.300654	1.14498	0.950683	0.969103	2.97504	1.17291	0.356506	0.207962	0.118835	1.02614	3.59715	2.76173	1.52347	1.03922	0.326797	1.06952	2.44147	0.237671	1.87166	1.45573	1.72311	0.534759	0.237671	0.594177	1.74985	0.356506	0.356506	2.30481	0.534759	0.534759	3.29174	7.16875	2.44029	1.47653	1.18835	0.505051	1.51099	1.02436
C3orf52|79669	2.11293	31.7738	31.7074	28.6719	11.1115	24.446	29.2383	8.2919	4.41939	46.6009	13.228	16.2539	25.2983	37.2869	4.72301	4.49219	8.30966	85.0401	34.6747	2.46804	46.7969	10.5966	25.1747	37.1165	1.0831	23.4996	5.15447	23.783	25.7102	32.864	39.2656	7.22656	46.7724	14.5543	3.41761	15.5717	5.37997	4.19034	11.5529	3.03445	73.7053	43.043	124.603	14.6133	9.28161	172.765	29.3821	40.3427	36.2738
C3orf55|152078	2.69824	3.8533	1.91179	0.97493	2.065	2.67967	5.51996	9.5636	1.75673	7.37233	1.39276	71.273	1.85701	11.6342	1.70102	3.06407	0.742804	1.12442	0.0185701	4.65274	1.39276	2.36769	8.16992	2.61003	1.40297	2.6416	3.20334	1.96007	1.48561	1.39276	1.03157	1.29062	2.1727	1.11421	12.3955	4.08821	0.902507	0.835655	16.7549	0.330548	0.696379	1.50604	7.052	4.16063	0.381616	1.8208	3.80687	0.649954	1.92015
C3orf57|165679	9.87641	22.0859	9.45794	20.7056	228.316	22.0152	98.3964	36.7953	13.4185	141.588	3.29228	139.693	4.6882	4.34215	247.776	332.791	2.16565	24.3408	1.82134	149.899	440.385	177.413	19.5048	21.699	58.9007	3.51605	91.6947	4.70338	11.7121	5.0915	79.9718	21.6834	1.12749	0.737207	13.5026	213.592	6.21813	1.62619	1.75325	0.693842	33.729	34.6357	38.2095	153.366	11.9701	149.433	73.2793	119.03	702.162
C3orf64|285203	42.9013	36.9056	32.0347	14.7724	11.895	27.3586	19.2946	35.3581	25.7657	34.3196	24.5539	35.342	34.711	9.50145	13.9451	17.1016	48.4916	14.4167	38.5248	15.7394	16.7011	12.6057	18.6416	40.6469	23.5626	32.1537	15.3167	16.6874	12.8887	12.8251	28.4383	26.9003	8.44171	25.0932	8.69461	30.7493	17.04	16.4518	59.1681	11.4764	9.62042	25.7791	40.8516	36.0272	17.9949	19.7883	48.4477	30.0429	27.6272
C3orf67|200844	2.84061	8.71359	11.0724	3.63875	6.14442	2.10558	16.2468	9.25809	18.4401	5.75971	13.1129	43.8536	12.5562	9.1962	8.49717	8.21238	3.66788	43.4858	5.87217	5.84304	6.44822	14.9834	22.18	14.1036	8.32443	4.09102	2.34142	15.411	8.89684	10.0688	9.83536	14.0566	12.8556	2.26214	6.92557	2.35194	4.46845	13.0441	7.09547	7.07362	5.1339	4.27265	6.47694	3.05138	64.9964	21.2658	2.14239	5.95469	18.8006
C3|718	103.522	542.7	505.908	463.124	528.458	1643.25	1521.66	938.31	30.7827	881.745	710.027	204.782	344.38	289.01	697.736	538.264	1424.05	44.7086	724.78	108.349	359.677	223.402	410.83	606.787	1276.19	738.826	462.345	977.46	156.143	231.598	593.6	753.309	126.266	408.367	2732.9	1439.73	1062.94	81.213	752.232	555.74	44.5495	577.044	2067.47	1013.11	1168.46	634.821	764.804	652.064	202.23
C4A|720	26.3334	2733.27	2278.48	1507.68	503.072	4774.21	3460.79	4422.83	36.3243	6478	632.074	58.6275	124.13	654.784	2738.08	510.818	1251.02	79.1269	61.8634	31.9065	1352.65	1540.6	1167.16	125.344	446.622	122.609	3464.47	4892.34	2581.74	1530	315.197	4370.4	220.534	1140.28	331.747	1553	225.293	25.2903	161.912	2671.6	260.373	3395.1	3063.65	2546.88	821.692	660.771	2855.13	1102.11	565.375
C4BPA|722	0.507614	3.00338	7.18359	0.592217	0.253807	0.930626	2.58037	0.592217	0	0	0	0.0846024	0.0846024	0.169205	0.0423012	3.57191	16.0068	0.169205	0.169205	0	0.00423012	26.9865	0.0846024	0.854484	0.336717	0.253807	12.5618	1.33587	0	3.6802	0	27.4738	0	0.930626	0.338409	5.24535	2.62267	0	1.61591	0.169205	1.05753	0.0964467	0.972927	2.96108	0.282572	0.0964467	12.0973	6.77496	3.4264
C4orf12|404201	2.35792	3.23458	5.0786	2.29746	2.44861	7.87606	3.14389	5.22975	4.27449	3.86941	1.75333	1.63241	2.5393	7.3156	2.237	0.780532	1.33495	0.816203	1.75333	0.272068	2.11608	1.02781	2.237	3.29504	1.14873	1.25151	2.237	2.90387	1.14873	5.35067	3.56711	3.14268	1.4208	0.816203	1.08827	4.16929	0.574365	2.38815	1.36034	1.87424	1.50726	1.75333	2.68682	5.01511	2.14631	8.01693	5.6705	6.16687	3.02297
C4orf31|79625	2.96221	8.45723	10.3566	10.9371	1.98248	30.0392	14.7437	4.51529	0.961869	12.9282	3.32875	1.20234	0.566816	1.71762	8.89007	0.515287	0.738578	1.51151	0.652697	0.480934	4.85915	11.5359	0.360701	1.68155	0.413604	1.09584	8.20921	4.4215	4.17382	2.03401	1.98248	4.84095	0.480934	1.30539	0.240467	6.86431	0.103057	1.35692	0.583992	0.335623	0.583992	6.53006	5.15321	10.0687	0.652697	34.4057	8.89007	0.755754	4.6527
C4orf38|152641	1.65213	0.458926	0.963745	1.17026	3.45296	2.41028	0.665443	3.09959	0.18357	1.38504	0.367141	0.0458926	0.458926	0.179899	1.78706	0.229463	1.20468	0.137678	0.459385	0.0229463	0.396971	0.367141	0.321248	1.19321	0.229463	0.335934	1.33089	1.21615	0.596604	0.563102	0.550711	0.780174	0.928866	0.298302	0.00367141	2.26893	0.275356	0.0917852	0.374025	1.14594	0.229463	0.468105	1.85268	1.77926	0.252868	1.37173	0.960073	0.844424	0.0458926
C4orf48|401115	3.79747	16.6034	13.3354	2.63713	23.808	21.2215	4.10127	66.2743	23.7321	44.9051	6.51055	50.1371	67.6751	3.98945	12.4114	30.2764	7.12658	57.27	2.44937	57.9072	8.43882	38.9852	2.67722	15.3397	8.95992	3.89451	8.43882	15.1013	88.943	33.0928	20.5675	4.31224	32.2785	17.3376	9.01477	13.7722	10.8882	11.2363	2.50844	6.93882	24.5316	4.14135	11.2574	1.81013	10.7911	5.0654	1.89873	1.47679	43.7342
C4orf49|84709	0.485437	2.45034	3.37789	1.91934	0.149365	4.87304	1.60568	1.02614	1.47423	2.09111	0.828977	0.149365	2.295	0.522778	1.52128	1.97461	0.746826	0.821509	1.2696	0.29873	0.540702	0.373413	1.34429	1.60045	0.522778	0.672143	1.06049	1.1882	2.50187	2.12248	1.04556	2.46303	0.261389	0.896191	0.746826	2.7655	0.0746826	1.2696	1.06796	0.29873	0.681105	1.30695	1.7177	5.82001	0.485437	0.519044	2.29425	1.00822	0.784167
C4orf7|260436	6.38961	5.28757	8.08905	24.82	105.827	74.5158	1.63822	7.39889	7.32839	37.7662	2.22635	3043.5	41702.3	4.5269	33.2931	92776.9	64212.1	0	86.6308	4.69944	6.58442	0	93.18	15.9647	8.03154	95.1577	93.4174	8.04638	4.35993	4.45269	9.27087	138.968	1.66976	0.185529	0.556586	95.269	33.8108	0.371058	4206.16	3.33952	0.556586	0.185529	30.308	30.2857	58.7774	12.3135	32.7069	0.185529	1.85529
C5orf13|9315	221.202	211.891	392.937	186.205	100.403	599.461	285.747	108.837	2083.17	389.766	261.294	539.395	1067.74	78.1717	174.575	456.139	370.457	108.26	457.674	104.972	297.091	215.216	219.167	149.409	162.894	122.474	196.933	140.436	287.355	115.72	93.3815	337.224	112.698	136.243	81.1294	261.804	44.9624	573.255	275.092	123.077	82.8159	216.533	324.216	410.55	136.48	112.997	94.7326	59.6827	235.097
C5orf23|79614	30.7689	11.0121	4.5924	6.01831	4.24111	2.00173	0.965458	8.00415	5.28325	7.30294	0.863558	0.294991	327.234	3.07254	4.40484	3.29706	6.29879	4.13299	16.6646	6.05803	8.00898	45.5713	6.33886	11.6784	1.56995	45.6808	5.52193	2.58273	2.19344	4.47219	12.3824	18.1081	1.83074	25.9071	1.03454	3.07358	0.466321	11.494	12.8377	8.27081	2.45527	2.25803	9.93644	34.3959	1.41451	17.6698	7.62211	3.21693	5.19689
C5orf34|375444	13.8418	6.17132	11.0952	3.77066	5.19595	8.0936	13.665	14.0695	30.5189	10.0438	10.3722	39.0378	30.9009	7.46743	5.62562	19.8396	12.2583	7.7329	26.2304	10.3749	9.70936	13.6426	12.8779	11.6021	9.72414	11.4007	3.45922	11.0504	9.33114	7.63547	11.1073	6.60536	18.2419	13.3459	6.68692	3.77176	45.5342	14.0936	23.2726	5.07334	19.0564	8.39354	8.83689	8.52983	21.9475	21.0826	5.81719	10.2578	19.8166
C5orf46|389336	117.927	56.7625	11.1969	1.9305	11.112	33.1274	25.6429	23.112	13.9266	42.9923	11.4865	4.82625	132.573	2.22008	9.88803	274.411	42.361	16.1892	8.38417	41.0927	19.4981	23.5792	18.971	10.11	3.57143	59.0367	64.7876	3.37838	43.1776	3.94595	1.9305	8.97683	2.89575	45.888	12.2471	12.7413	44.9228	22.3417	121.305	5.28958	1.5444	55.8031	11.0039	40.7548	0.289575	3.95946	6.85328	0.0965251	6.56371
C5orf49|134121	1.02339	5.99415	8.18226	11.616	28.8821	4.91131	14.1871	23.2271	5.7768	2.9152	37.5409	5.29337	8.69688	1.74074	16.2573	2.23879	6.59162	7.01462	3.8499	0.243665	5.26121	20.039	2.87037	58.462	1.96491	0	18.1686	60.0819	59.886	4.77583	20.537	54.6598	28.845	7.16862	1.70565	7.58187	1.43567	2.82651	5.32164	7.38694	22.7456	11.116	39.4288	16.6472	3.15984	4.48343	5.84795	30.9561	21.5312
C5orf4|10826	52.035	36.3207	80.4627	47.034	8.73149	29.8816	18.0266	30.5481	11.6144	17.4906	46.1565	27.8247	8.15949	8.36137	10.6662	12.9085	15.5619	10.142	6.75	13.3075	61.6016	6.00538	12.0999	19.1655	12.074	11.0081	25.6989	132.242	20.357	11.1413	86.6524	107.572	18.1221	10.4627	65.4105	57.4065	7.9576	3.02826	15.7133	47.642	32.8395	6.72544	61.2534	49.209	9.95794	10.4142	76.8439	1812.65	2.45626
C5orf62|85027	22.8013	42.4536	88.295	48.8986	49.3181	117.369	53.2444	106.842	25.2514	132.74	29.8279	26.7381	36.0587	15.8013	67.4596	39.3718	37.1922	41.7918	24.5449	42.8766	77.4797	59.5725	32.0266	41.6533	57.1686	20.565	110.948	43.0692	42.3999	64.726	52.5504	47.8756	25.1274	56.8063	15.1731	105.804	11.1691	114.552	90.2835	27.0457	25.572	44.8128	110.155	152.799	30.1801	70.5484	74.0868	14.561	75.6789
C6orf115|58527	112.584	120.932	151.064	145.704	95.2312	278.313	252.982	173.496	400.772	426.025	114.631	300.327	704.75	44.6352	108.719	2427.29	426.213	78.5623	211.706	1076.14	151.749	357.909	176.458	304.364	159.724	602.979	99.1695	195.63	238.721	95.0325	84.9809	131.621	322.373	217.945	230.589	92.1627	577.819	410.249	490.343	166.714	171.434	221.705	267.713	166.587	557.882	163.957	127.544	207.071	356.912
C6orf125|84300	104.243	237.871	408.576	149.034	235.998	248.51	265.784	269.879	1079.42	441.594	225.909	604.399	535.309	147.215	234.413	1733.01	530.176	472.518	701.992	553.75	608.388	273.633	1164.81	906.279	185.982	328.485	242.626	691.289	385.228	728.169	333.872	145.171	438.121	276.426	407.723	367.96	283.018	679.077	473.956	295.168	430.636	449.282	430.349	225.076	567.728	562.21	177.859	524.146	398.463
C6orf126|389383	0	0.659341	48.7802	14.1275	20.9231	27.9451	11.7077	2.85714	2.52747	11.0703	3.95604	3.2967	0.659341	4.27692	13.2703	33.8462	1.0989	0.10989	1.86374	1.75824	0.21978	2.74725	8.13187	13.0462	1.64835	3.18681	46.8703	134.653	15.9297	0	0.21978	22.2615	1.0989	10.7231	1.75824	2.85714	3.18681	0.549451	0.989011	51.2	0.549451	32.6308	8.64615	16.011	3.17582	3.72527	0.989011	25.4132	13.8352
C6orf127|340204	0.419287	1.03145	17.4801	18.0273	8.81551	13.6268	13.7862	0.863732	2.36268	31.2117	3.9434	35.891	0.314465	2.97694	3.93501	8.42558	18.5744	0.203354	25.5702	1.78197	0	8.00629	0.601677	6.63312	3.39623	31.2159	29.2369	20.6709	1.57233	0.794549	0	10.1027	2.24319	38.0252	9.25157	1.84067	11.4822	0.104822	7.37945	16.4382	0	23.8386	7.46331	9.1174	2.18239	1.25786	0.419287	25.8679	7.96855
C6orf129|154467	30.6923	71.821	144.534	56.6845	66.2119	55.5604	83.2606	65.8242	242.92	127.849	67.2983	305.526	137.529	62.9592	67.0267	161.4	361.419	153.878	284.615	260.973	133.374	78.3783	328.554	163.088	77.9278	20.2857	95.8148	115.871	87.5338	314.937	73.8697	53.6484	142.425	150.075	134.33	108.846	119.462	195.072	286.234	60.0534	143.223	98.0502	132.339	70.0141	180.396	84.7331	35.3642	102.364	117.082
C6orf142|90523	1.64756	0.310411	0.095511	0.0238777	0.41404	0	0.095511	0.382044	0.0768863	0	0.0716332	0.405922	1.43266	0.0238777	0.095511	2.26934	0.0716332	0.202006	1.13085	0.143266	0	0	0.573066	0.528653	0.119389	0.787966	0.119389	0.0477555	0	0.74021	0.644699	0.585482	0.0725883	0	0.668577	0.549188	0	0.0716332	0	0.095511	0.167144	0.119389	0.526743	0.262655	0	0.940306	0.191022	0.095511	1.64756
C6orf145|221749	83.4455	32.6644	53.3306	34.6291	25.8688	68.0335	62.3437	47.1533	39.5762	77.8109	30.4003	39.5794	46.3645	11.308	36.7214	250.735	75.934	15.9014	147.952	57.6346	46.9597	97.3673	214.477	96.2126	29.5201	106.332	53.6599	42.6961	61.4432	33.9059	39.6133	92.7173	30.1877	36.7974	41.3519	69.1144	24.5011	25.7114	164.531	22.7626	23.3641	59.7241	139.11	54.3085	25.5287	22.8896	85.0457	31.0638	34.1425
C6orf154|221424	1.53654	10.65	25.0115	8.99872	4.96923	5.12821	2.30769	8.70064	5.21346	22.2744	9.6	1.37821	6.53846	8.75833	1.66667	0.416667	2.70064	14.7083	4.16667	0.641026	1.79487	4.09936	21.2244	4.58333	1.92051	3.13846	5.41603	2.59615	5.60256	26.0577	10.2878	9.45513	11.4724	7.81731	7.87372	8.45833	1.08974	1.08974	7.35705	6.81795	6.27756	8.20513	7.83654	5.41346	2.16859	17.3391	2.59615	36.3519	10.6558
C6orf155|79940	2.36413	3.15002	6.42482	2.66383	5.97579	4.1091	2.94647	0.928742	1.05319	1.77668	0.357995	14.4426	2.89192	2.97988	14.5919	2.95124	4.761	1.91544	6.76884	0.671667	8.55779	1.0058	8.373	3.2148	0.370951	0.350835	2.77975	7.52404	3.27924	5.48619	9.52711	2.17081	1.39789	0.238663	0	5.36277	1.47153	0.119332	7.43505	3.26833	0.357995	6.50665	35.9741	20.12	0.878282	10.285	8.63655	12.7743	17.8663
C6orf15|29113	3.31878	1.39738	0.174672	0.524017	0.262009	4.81572	0.193886	0.611354	1.69432	4.69607	0.475109	0	6.79301	0.0672489	0.611354	0.262009	0.262009	0.0873362	0.521397	32.1607	0	0	0.262009	0.0873362	0.174672	34.483	5.2393	0.262009	5.32926	1.04803	0	1.39214	0.174672	0	31.7301	0.957205	52.7633	0.174672	1.99651	0.0873362	0.174672	0.455895	1.22271	4.48821	0.0873362	0.0873362	1.65939	0	1.13537
C6orf165|154313	4.9305	4.33189	5.32928	4.14857	10.1811	6.03084	3.1225	5.05604	2.62815	8.49262	4.10773	4.98262	3.28758	0.986968	8.11903	1.15291	2.41095	0.914422	1.32754	0.673328	0.429626	2.7563	2.06603	3.17116	5.54214	0.909644	4.49566	8.16638	11.9414	8.87142	7.11903	8.7967	7.94874	4.7298	0.980017	2.22893	0.57993	1.56386	4.28236	8.7967	2.93223	4.79757	7.42311	2.67202	8.43745	2.96003	4.27889	10.2498	2.47611
C6orf168|84553	5.45275	4.96617	3.56923	2.93568	1.92975	8.28801	4.9346	7.22185	43.6787	11.3159	2.83827	39.7244	15.086	4.09471	3.35126	5.70811	5.51589	5.25698	1.80218	3.45275	4.37905	1.84075	3.25127	8.23737	2.18295	3.49424	3.14115	2.35869	4.13716	4.00711	2.22885	3.91176	9.15785	4.02726	0.975649	2.44855	7.40588	11.9194	18.0515	7.70046	5.96617	4.73688	3.26829	4.70822	5.07327	6.51848	5.20903	18.2581	3.55899
C6orf174|387104	1.44367	2.57908	3.3275	1.91498	1.61931	2.04432	1.52624	3.00327	24.8749	2.21169	1.28645	1.81689	5.25974	1.06077	1.77082	2.25064	3.00945	1.56905	3.87835	1.63004	2.79624	8.22801	2.92454	5.66014	3.00502	2.4923	2.05855	3.28796	1.00362	1.20714	2.80324	1.95591	1.6031	1.27012	2.9032	3.41719	0.817238	1.90518	1.87544	1.42874	1.50595	1.69536	5.41579	2.67915	2.35643	1.74913	3.60135	2.41987	2.21845
C6orf186|728464	0.978474	2.10372	2.5636	1.41879	1.22994	2.39726	3.12524	2.49511	2.73973	1.07632	1.14188	1.76125	1.08611	0.636008	1.17417	0.244618	1.07339	1.22309	0.505871	0.391389	0.235812	4.46086	0.684932	1.38258	4.05284	0.440313	1.46771	0.470646	0.403131	0.684932	1.36986	1.94618	0.880626	3.55186	0.22407	2.29941	0.587084	0.820939	0.402153	1.32094	0.244618	2.94031	2.20157	4.71918	1.41292	1.01957	1.09883	0.293542	1.66341
C6orf1|221491	14.1344	72.0534	101.703	43.9954	76.3103	94.5792	57.2947	88.849	62.0479	185.394	133.129	55.8011	64.1648	107.797	67.814	108.908	102.858	91.5378	55.0313	78.8867	118.449	69.9816	238.22	246.713	33.721	52.4797	81.3748	246.165	190.632	154.854	120.168	148.567	131.276	62.7523	61.2698	74.9153	33.8858	137.869	70.0958	83.1013	86.4401	145.094	113.537	141.895	104.549	80.0129	40.7661	199.634	73.0617
C6orf211|79624	19.5713	177.34	180.475	82.108	127.029	115.657	52.8996	158.008	61.0532	83.1985	319.61	62.2358	73.3898	60.9532	140.827	47.5153	45.3732	166.859	45.2164	35.2719	184.24	50.3573	58.8309	321.998	91.2037	44.6792	52.5546	56.9397	131.36	1139.17	1010.15	94.5987	459.561	46.684	173.301	73.8722	31.322	49.0234	64.2505	115.644	349.762	888.298	102.493	112.244	85.6939	384.64	123.16	212.759	189.073
C6orf222|389384	0	0	0	0.0799574	0.0266525	0.0533049	0	0.0266525	0.960821	0.10661	0.0533049	0.00159915	0.776652	0.186567	0	0.000266525	0.00879531	0.133262	0.0826226	0.0399787	0.0799574	0.0533049	0	0.0533049	0	0.10661	0	0.00639659	0.692964	0	0	0.0266525	0	0.133262	0.373134	0.0271855	0	0.00266525	0.00266525	0	0	0.319829	0	0.00346482	0.0266525	0.0266525	0.0511727	0.0293177	0.186567
C6|729	0.632911	4.4579	0.770501	2.90314	1.40699	0.0550358	0.165107	3.35718	0	0.137589	0.247661	0.756742	1.39075	0.90809	0.564117	0.454045	2.42157	0.192625	0.288938	0.0275179	3.01321	0.0550358	0.0275179	2.36654	5.2284	0.412768	0.921574	0.976885	5.37039	0.178866	6.09521	0.302697	0	0.12383	0.00330215	3.09576	0	0.0550358	0.90809	0.798019	5.96835	1.47221	20.9516	0.839296	0.220143	1.77078	1.98129	2.42157	1.65107
C7orf16|10842	0	0	0	0	0	0	0	0.058072	0.058072	0	0	19.9361	0	0	0	0.058072	0	0	0.029036	0	0	0	0	0.029036	0.00696864	0.058072	0	0.029036	0	0	0	0	0.493612	0	0	0	0.174216	0	0.14518	0	0	0	0.116144	0	0	0.0110337	0.058072	0	0
C7orf41|222166	181.71	65.244	191.252	84.907	51.808	121.341	49.5465	108.417	454.889	113.99	46.6657	455.183	225.775	66.0622	103.361	63.5285	55.511	31.3499	115.332	42.7988	158.909	118.544	133.452	54.4664	29.6031	52.1091	44.0879	138.795	67.8826	56.779	160.727	103.924	37.837	26.2132	67.8964	108.953	29.7017	47.2698	23.0396	119.23	29.3154	202.866	165.947	163.326	83.6552	77.244	148.474	133.473	112.887
C7orf47|221908	14.8227	33.3452	73.0021	42.3118	36.6528	56.4056	37.4171	75.5579	66.8749	114.161	25.2868	44.6361	47.3389	30.7414	41.1689	143.983	72.5047	60.5558	75.4348	154.381	104.176	69.6455	76.0813	100.935	31.7007	61.7935	53.9437	170.516	81.1241	78.0699	48.1376	68.122	41.1731	25.5474	35.6058	54.8634	41.2993	81.5339	114.398	54.39	50.9426	53.2784	55.0626	84.2252	62.1804	46.3149	21.2565	65.7195	72.5819
C7orf51|222950	0.425487	0.33455	0.836375	0.182482	0.33455	0.152068	0.130474	0.768552	16.3622	1.09489	0.126521	2.78285	0.192822	0.167275	0.335462	0.125	0.263686	0.157543	1.65754	0.836375	2.58333	0.128345	0.106448	0.33455	0.33455	0.128041	0.38017	0.456204	0.0608273	1.45985	2.8379	0.291971	0.304136	0.0304136	0.319343	1.09884	0.517032	0.33455	0.685219	0.0760341	0.241484	0.139599	0.38017	0.611922	0.0912409	0.353102	0.897202	0.182482	0.517032
C7orf58|79974	5.63833	31.7595	32.9048	19.0736	12.0626	46.1555	29.6211	46.3048	3.32863	20.0586	341.576	6.18722	14.8137	18.1577	12.4119	5.97093	13.6396	12.2379	6.63128	2.62115	12.8216	12.0317	9.00088	23.3661	33.1115	10.0903	12.3907	9.7326	13.3106	12.7335	39.3696	28.6075	42.9357	12.3335	2.04846	28.7366	2.18062	3.89207	8.01454	9.1652	13.0137	23.3824	65.478	47.4678	8.72511	16.5282	40.0185	18.5727	8.63128
C7|730	25.9542	55.2814	33.8876	103.648	31.6127	2.72124	7.15523	198.103	0.960458	7.06405	9.71601	5.88105	10.8725	25.0565	25.016	29.3222	46.8503	6.76797	3.26275	0.777451	12.6644	1.79641	3.31797	15.0324	39.8624	2.01373	60.0379	4.46863	0.790523	5.73039	97.2549	44.4676	2.73562	0.903922	1.85882	80.1827	0.563072	0.848039	9.39608	13.2683	11.365	13.9467	124.97	48.9546	14.4559	52.1141	78.5471	5.08301	18.3565
C8ORFK29|340393	0.649394	3.74862	5.48842	0.771775	1.61521	0.330761	1.81367	4.79603	4.7409	5.74311	0.606395	4.79603	1.54355	0.551268	1.48842	5.62293	5.23705	1.92944	3.03197	3.47299	3.6935	2.2602	0.606395	3.06725	0.937155	4.57552	4.28997	1.91069	1.48842	1.21279	4.90077	0.661521	4.63065	1.32304	7.77288	1.92944	3.33627	30.1841	1.87431	1.41566	2.53583	1.59868	0.441014	1.62183	1.45314	0.716648	0.427784	1.37817	0.937155
C8orf30A|51236	32.9295	70.7489	104.241	70.8881	115.001	92.707	38.5736	118.83	134.438	113.722	58.2709	65.1264	131.142	43.6564	124.382	176.089	215.863	121.515	249.805	53.6344	138.383	83.5744	70.5013	121.196	52.2018	129.262	121.95	107.87	81.826	138.016	117.237	42.4449	191.41	61.9863	112.061	69.4802	159.846	267.826	147.27	61.8436	218.846	74.1233	80.0586	89.6797	119.356	85.9273	21.5617	74.3432	147.952
C8orf34|116328	0.232801	0.69319	0.814802	0.225851	0.38221	0.295344	0.312717	0.949965	1.05629	0.845726	0.138985	0.920778	2.05003	0.208478	0.886032	0.540653	0.320361	0.347464	0.469076	0.243224	0.185198	0.364837	0.402363	0.765462	0.191105	0.173732	2.69284	5.20222	0.434329	0.660181	0.51911	133.014	0.104239	0.347464	0.781793	0.380473	0.104239	1.94267	0.350243	322.771	0.173732	0.268937	1.02502	1.63308	0.760945	0.364837	0.295344	0.333912	0.660181
C8orf38|137682	22.7091	52.3971	51.2257	42.7865	68.13	42.1969	34.0642	44.479	203.202	41.552	131.846	84.6256	92.3086	22.8623	101.77	29.4546	70.797	59.7887	63.6493	114.344	111.209	26.4198	135.712	109.315	43.1084	46.854	52.7246	79.125	43.2937	211.364	85.2854	63.1549	137.024	82.2329	44.208	31.8025	52.3213	189.305	62.3119	68.2124	348.997	47.4325	48.9342	78.6056	108.72	71.2627	27.9159	104.408	112.315
C8orf39|55472	2.25247	3.44006	4.37236	2.1354	3.77574	1.83921	3.72496	2.15233	11.141	3.52609	3.74753	10.7574	3.96897	1.27927	4.19323	2.32722	5.59944	5.01834	10.5543	1.622	4.16079	1.76305	3.6897	12.4274	3.5952	6.66432	1.76023	2.67983	0.423131	2.31735	2.93653	0.423131	4.72496	2.17207	1.96051	1.86883	2.04513	8.811	4.80113	3.84485	6.01128	3.72638	10.969	5.88999	10.4993	4.65867	2.97743	5.07757	3.05501
C8orf47|203111	6.12581	0.387097	1.6129	0.387097	0	0.258065	0.193548	0.774194	9.65742	0.129032	0.129032	11.1652	1.01548	0.0645161	0.290323	7.01226	5.83226	0.0967742	4.28516	22.4206	0.129032	0.0645161	0.16129	0.451613	0.322581	0.129032	0.451613	0	0.774194	1.36774	4.06129	0.516129	0	0.0645161	22.2213	1.94581	2.16129	0.258065	0.580645	0.129032	0.0967742	0.322581	0.612903	1.67742	0.258065	0.2	0.903226	109.478	0.83871
C8orf51|78998	3.80616	7.97117	12.3091	6.89165	23.9592	12.0184	6.27584	23.9071	32.1918	13.004	7.91551	21.6367	25.3718	8.52038	18.6148	12.9831	10.1441	12.08	42.8514	12.0944	7.10984	9.7992	11.1446	16.1625	10.3792	5.90209	12.416	11.3091	15.0323	25.8072	22.6183	11.3295	27.5417	5.71024	25.6779	9.27187	10.1446	47.3827	9.88519	11.0696	35.6973	12.4155	2.63072	10.8365	21.2724	12.3921	4.99602	5.39811	17.0805
C8orf73|642475	1.62781	6.68248	9.82395	3.92484	133.686	6.11375	42.3899	44.7335	5.56672	85.9964	27.4678	2.24719	51.41	75.9992	15.4204	35.5824	22.3328	4.57918	17.5852	7.30748	15.3071	6.38746	2.37661	114.564	18.1519	7.61736	8.58039	30.1415	28.0024	11.3875	50.6278	6.76125	172.494	2.96101	20.7239	5.9168	27.4602	15.9747	9.40394	51.7251	37.7215	12.828	12.8191	8.95539	4.89068	7.50723	2.70539	2.02412	13.2215
C8orf76|84933	28.0008	74.2898	69.7598	45.0339	47.9197	89.6047	39.0504	112.594	198.109	83.6992	93.5685	54.2079	83.4268	40.5654	80.5394	74.0205	138.36	98.3795	188.58	176.906	82.0984	54.1425	85.8354	331.495	54.7504	98.4685	46.6929	77.9874	59.6685	122.361	92.985	80.7386	170.879	143.812	79.1071	44.8874	66.3488	309.72	132.746	97.1819	244.92	55.6024	90.5654	68.5386	82.9402	75.5961	38.9827	89.1591	159.324
C8orf79|57604	3.07993	5.20565	10.6849	2.86805	1.86371	5.34373	5.1403	5.85113	6.05424	10.6941	1.35251	3.83548	3.72457	2.70617	3.38962	3.40981	3.86889	2.92546	5.34172	2.30968	3.76412	2.02876	3.77099	7.72478	2.91478	2.52791	3.83686	7.86826	2.52136	1.88116	11.1677	10.0077	1.9761	1.54208	3.83252	6.16853	1.39903	2.82829	2.89427	13.7789	2.93783	4.49556	7.87439	7.39015	2.60277	5.27416	11.2365	7.53457	2.91288
C8orf85|441376	102.068	131.462	88.2881	18.2677	2.36229	13.7768	46.221	14.5904	51.6196	42.2622	88.6251	113.529	468.306	9.18582	35.7653	10.0181	89.3315	400.608	2056.88	47.6053	263.471	31.3073	13.4041	458.346	26.7686	232.814	202.804	169.948	134.524	29.348	1733.9	51.6811	110.638	44.4871	12.7988	68.6196	196.563	15.448	94.4563	8.37933	701.585	43.7092	19.8389	65.9291	10.6031	29.7092	15.6504	216.018	6.92468
C9orf116|138162	6.08755	23.1067	125.472	83.2599	65.7059	38.2435	34.6402	28.2558	13.4679	28.0889	47.0944	33.5157	28.223	22.5034	45.9166	19.6553	41.0876	17.3311	15.0999	23.9508	17.5663	43.5267	30.2941	51.8564	17.1477	8.31327	76.6826	375.107	222.573	22.3543	76.2558	216.209	70.5718	47.4501	23.5677	60.565	18.6731	1.95349	9.4788	143.185	43.078	73.0465	98.2627	57.5787	40.8577	69.5075	21.0287	134.598	55.6347
C9orf117|286207	2.14205	2.73393	7.6257	4.32807	7.89177	2.73675	4.17136	2.53664	3.59583	5.63698	2.93123	9.19335	3.04397	1.92446	5.62289	1.32976	4.83653	3.07215	3.71815	3.01578	2.74126	5.52424	2.81849	11.1409	1.60654	5.32356	4.97576	49.4324	9.81962	2.00113	7.58737	17.0654	7.55355	4.25592	1.91375	2.84667	2.90304	4.36866	3.01578	14.3179	5.97125	7.79256	7.63811	2.80947	3.72322	4.88952	2.50846	51.9865	4.65389
C9orf125|84302	4.9782	6.04455	8.39668	2.65166	2.72512	4.9782	1.35071	4.40758	2.48673	2.07536	2.77109	27.7005	4.92891	2.04834	1.91754	2.58152	3.02986	2.5109	1.07962	1.3981	2.709	1.37014	1.8019	1.65592	2.68863	1.65166	4.95024	1.69668	2.59052	5.34834	3.69716	3.17536	1.27441	1.40047	9.36825	8.72891	0.118483	1.89336	2.61564	0.876777	1.75355	2.9	6.38246	9.6981	1.96682	2.50047	5.86066	1.59716	7.12986
C9orf140|89958	15.2613	16.2189	25.555	22.5876	20.6592	8.67581	23.7979	22.3568	108.017	21.562	30.762	140.18	110.593	22.1035	19.503	57.4528	25.0611	17.0034	65.5276	70.6021	29.8184	72.9102	23.7832	75.1679	21.7446	29.7583	23.8957	23.549	10.5552	16.9193	30.4934	7.44631	60.0647	43.245	19.2686	21.4712	58.9464	53.0665	94.3032	10.2197	48.7744	8.69056	5.67529	17.1576	82.4264	23.941	6.09573	10.0957	25.3485
C9orf142|286257	49.8249	78.3137	150.264	71.8155	101.931	81.9401	87.6604	82.7462	220.477	120.113	59.1492	166.655	209.013	57.671	85.9424	256.09	205.378	57.6122	178.894	317.004	135.921	168.384	202.6	312.576	59.8672	130.838	186.74	294.441	146.457	68.5546	105.463	88.9119	121.55	110.121	88.6816	130.683	91.6404	74.396	82.7521	84.3984	94.0599	70.7944	151.644	78.0776	180.472	66.4912	45.463	73.537	71.2902
C9orf144|389715	0.0163159	0.0166422	0.0326318	0.0163159	0.000163159	0.0326318	0.0326318	0.0244738	0.0163159	0	0.00815794	0.0163159	0.0163159	0	0.0163159	0	0	0.0163159	0.0331212	0.0489476	0	0	0.00310002	0.00114211	0	0	0.0163159	0	0	0	0	0	0.0326318	0	0	0	0.0163159	0	0.00244738	0.0163159	0	0.0181106	0.0163159	0.0207212	0.0109316	0.0027737	0.0163159	0	0
C9orf152|401546	27.7969	22.8677	41.3829	27.8188	44.46	140.914	53.7402	3.03225	25.6353	60.4477	80.4463	53.5285	13.3773	129.873	49.4474	1.91364	26.8239	30.3907	5.56783	0.148258	70.3814	28.7658	297.553	23.6542	12.6612	0.554855	18.6816	73.1742	58.3973	11.467	10.262	111.91	69.732	41.5971	13.341	27.1631	4.49629	56.1227	3.29652	126.669	51.722	45.5033	47.2895	65.3469	118.069	86.1942	76.1027	123.327	44.8832
C9orf163|158055	0.82644	1.16622	2.05334	0.52184	1.06765	1.85234	0.70545	1.03943	3.92965	1.04368	1.73483	0.887901	1.43332	1.78353	1.00503	1.04291	0.218786	0.458446	2.26401	0.231156	0.814457	0.721685	4.03247	1.20951	0.425203	0.945497	0.927716	2.58949	0.463858	0.811751	0.927716	1.02435	1.86123	0.613838	0.858137	0.585234	0.637804	3.26169	0.425203	1.26208	1.44956	0.875918	2.03015	0.367221	2.01005	1.46579	0.609586	3.50792	1.71705
C9orf169|375791	0.660502	3.54029	4.22721	2.90621	6.21797	1.4531	4.44254	2.31176	0.660502	55.321	0.660502	3.43461	0.396301	3.30251	2.17834	0.858653	0.726552	0.39498	0.594452	2.17966	2.85733	23.2338	33.8336	4.22721	0.660502	1.0568	3.41612	8.84676	5.34478	4.02114	4.56539	1.321	8.90357	0.295905	1.73448	1.71731	1.1889	1.91546	0.396301	1.5852	2.24571	1.0568	2.29458	2.44386	1.11361	2.57596	0.858653	1.61559	5.60238
C9orf172|389813	0.373934	2.05595	4.14159	2.27363	4.17468	1.16138	1.00478	1.05595	1.18936	4.02559	1.41146	0.763562	2.89526	1.84169	1.68953	0	0.639031	0.354145	0.73115	0.153531	0.272944	3.92289	0.604572	0.963835	1.17707	0.238826	1.67281	2.36882	1.55237	2.8028	3.53668	1.52951	14.1586	0.499488	1.55578	0.407711	0.290003	0.382805	0.35824	2.33231	2.08359	0.558171	3.97305	0.559195	1.25623	0.572501	0.191402	3.29478	2.25009
C9orf71|169693	0.233645	0.0778816	0.272586	0.0389408	0.155763	0	0	0.233645	0.661994	0.116822	0	0.194704	0	0.155763	0	0.0389408	0	0	0	0.0389408	0.194704	0	0.0459502	0.116822	0.233645	0.0389408	0.0389408	0.0389408	0	0.116822	0.856698	0.233645	0	0.0389408	0.116822	1.12928	0	0.116822	0	0	0.0389408	0.194704	0.831776	0.155763	0	0.116822	0.389408	0.116822	0.0778816
C9orf7|11094	37.4661	87.4722	113.794	65.6682	84.6261	125.311	62.939	77.58	229.696	94.9412	84.6791	57.2	51.1586	78.1695	60.9209	41.1194	57.408	42.2011	47.5695	21.4156	141.464	177.678	239.462	105.542	29.8668	32.1252	59.5045	136.709	91.3027	109.042	125.565	89.5118	128.392	65.7615	76.7238	85.265	30.6907	126.404	40.6584	50.8494	116.905	121.607	132.159	65.4374	115.705	88.6407	43.7804	96.3503	77.1771
C9orf89|84270	23.0683	164.21	165.441	54.9946	68.8905	140.795	40.9078	136.453	63.526	234.402	64.7419	41.6128	77.6052	84.4512	89.8167	83.5521	73.6562	76.1443	131.21	158.265	203.053	106.239	199.281	134.336	41.0694	84.2787	132.758	240.496	224.309	167.875	143.091	106.54	81.5922	38.3492	55.7419	122.706	54.4165	85.9338	132.259	42.9902	202.967	144.208	193.729	141.745	73.6367	90.1866	59.8286	108.126	108.987
C9orf98|158067	6.4658	15.3634	26.9065	16.1629	14.9097	8.46301	9.0228	9.54816	7.82969	3.10144	9.63006	3.60168	8.26059	4.74639	11.6729	3.52862	5.65054	3.0712	5.42392	5.53746	7.59795	5.88413	17.4574	9.70498	3.02699	1.75384	14.0968	29.9739	41.2727	9.302	27.4542	36.2946	10.6217	5.41973	3.14891	10.7697	3.93206	2.99721	1.9181	33.4872	14.9767	16.9358	29.772	12.6687	5.10796	39.7371	7.43229	21.3523	12.6575
CA12|771	4.75751	661.838	1383.96	316.273	937.287	809.423	235.477	796.454	8.47436	225.938	208.181	4.67593	20.7684	249.966	752.791	19.7512	34.3405	1047.12	9.71205	3.80147	1129.06	94.265	99.7616	1499.01	159.472	4.77141	301.379	1481.64	780.628	170.158	2033.27	769.053	1478.12	112.251	23.4064	539.935	6.07477	615.15	15.3612	384.602	1158.88	847.733	422.926	833.576	132.538	3912.6	716.435	1513.95	1788.79
CA3|761	21.9177	2.71454	1.59545	3.76532	0.233508	4.67017	2.00817	18.5639	11.8237	1.05079	0.963222	1.00409	6.07122	1.16754	0.758903	12.9305	2.97723	1.43024	3.84997	0.846468	1.81494	0	4.42265	4.8453	22.8897	0.991243	2.74197	3.75949	0.0583771	0.291886	18.5423	3.18155	0.340339	0.20432	2.21833	33.296	2.39346	1.78634	3.0648	1.60537	3.22417	4.66316	3.41506	2.01401	2.39346	1.68593	6.11208	0.642148	0.904845
CA4|762	2.69706	0.854701	3.22887	0.474834	0.0949668	0.272555	0.0949668	10.3628	0.154796	0.189934	0.0949668	0.0949668	0.2849	0.332384	0	0.0474834	0.54321	0.14245	0.0560304	0	4.61633	0	0.332384	14.3618	0.740741	0.0949668	3.7037	1.5584	0.854701	0.0949668	1.1396	0.807217	0	0.42735	0	18.0066	0	0.00379867	0.0949668	0.0949668	4.74834	0.379867	5.83286	1.79012	0.0949668	0.0949668	7.21368	0.718898	0.474834
CA6|765	118.74	0.321027	0.642055	0	0	0.160514	0	0	0.0802568	0.173355	0.160514	0.481541	0	0.0930979	0	6.25201	0.642055	0.0128411	2.35795	2.9695	0	0	0.00722311	0.321027	0.120385	0.963082	0.160514	0.0024077	0	0	0.0802568	0.120385	0	0	0	2.8122	1.56501	0	34.2223	0	0.0802568	0	0.24077	0.0802568	0	0.0128411	0.441413	0	0
CA9|768	0.196721	0.327869	3.7377	0.131148	0	5.08328	21.042	0.295082	107.586	0.622951	1.01639	4.42623	168.507	0	0.655738	45.5672	1.27148	0.269508	54.1134	89.958	0.42623	61.5567	0.0983607	0.0983607	0.00196721	3.35016	4.4577	1.15803	1.77049	1.63934	0.302295	0.459016	0.786885	8	217.75	0.0393443	133.969	29.8125	10.0354	0.491803	0.0655738	0.733115	0.262295	0.295738	0.0740984	0.819672	0.262295	0	1.04918
CAB39L|81617	17.6863	60.0546	66.2661	25.9016	39.7795	61.0036	21.4527	86.7071	54.9781	55.4986	25.0708	11.5683	42.6374	18.8415	62.0366	25.6134	15.0363	25.1404	25.5511	3.35929	73.585	10.3907	39.1104	28.0822	58.4287	4.80355	39.956	60.5292	31.6284	61.826	46.7148	31.9658	22.7372	37.0068	20.2295	49.2656	3.29235	21.6131	10.815	35.1227	26.4194	65.0738	33.9986	50.3172	54.2574	76.7806	74.5858	116.24	85.8404
CABLES2|81928	11.154	30.3908	23.1709	11.3078	7.42827	16.6547	25.6177	142.304	51.3532	28.4214	18.6203	89.7215	27.9696	57.4108	10.0964	29.7289	27.2956	32.5495	74.1223	15.7432	23.7982	21.0124	16.5638	28.9189	34.3902	24.1339	8.5498	16.6993	17.1036	15.0523	24.7585	20.4024	66.9511	10.2114	21.5712	12.8378	30.1868	15.828	61.9078	12.3561	26.8948	14.3493	12.3524	13.311	27.9266	21.7017	9.57596	37.1403	19.6285
CABP1|9478	0.594766	0.981761	2.06106	1.03093	0.436955	1.04362	1.0452	0.75337	5.76844	0.872324	0.872324	0.480571	0.951626	0.704996	1.07058	1.03093	2.24187	0.843775	1.29976	0.803331	1.30849	0.436162	1.11023	4.65345	1.38779	0.28866	1.30849	1.90325	1.66534	1.47423	3.16416	0.938144	0.277557	1.15464	1.00317	2.73196	0.237906	2.57732	1.03093	0.634417	1.80967	2.33069	2.92387	1.81998	0.746233	0.489294	1.14988	2.9881	1.03093
CABYR|26256	25.2759	16.5138	57.2055	10.5138	53.2207	15.4862	21.3759	50.4034	26.5579	46.4345	14.3103	116.152	36.3103	38.7897	31.4828	38	43.031	14.4276	163.53	144.983	71.749	3.65517	49.6069	92.5703	5.44483	28.9828	17.4807	122.707	65.331	31.069	24.2152	46.9366	41.7828	14.0317	25.0345	40.6172	40.0586	1.55172	112.541	43.8241	37.0621	95.6	28.9241	14.1221	16.4828	51.9062	25.1379	100.138	101.028
CACHD1|57685	58.5375	26.2569	31.6989	10.1471	4.84052	31.0608	10.3395	13.7203	17.2064	15.9941	11.9343	21.9282	24.681	3.75926	3.7023	12.1728	11.9833	5.68445	3.76058	32.3826	15.423	4.49972	3.09474	7.588	11.1593	4.87754	14.8369	2.7454	3.37953	4.27188	12.0323	22.4957	7.57357	5.2022	1.13974	30.0015	21.3585	5.93222	19.6294	3.64534	6.63528	5.99013	15.5202	31.6305	6.21378	14.1141	23.7074	19.1916	6.45434
CACNA1B|774	28.3802	0.235827	0.0584454	0.0604909	0.18235	0.0584454	0.00350672	0.0794857	165.636	0.0292227	4.42724	16.775	16.8548	0.0917592	0.0300994	0.154004	0.0561075	0	0.710695	11.6765	0.156341	0.847458	0.0409117	0.406195	0.0584454	0.120982	0.277615	0.0341905	0.292227	10.7101	4.69287	0.0619521	1.9287	0.0730567	6.10754	2.52455	0.321449	0.14962	0.0181181	0.102279	0.424605	0.201929	0.087668	0.0447107	0.122735	0.12069	0.131502	0.0435418	1.16891
CACNA1D|776	5.05236	18.5216	27.6892	2.65443	20.3929	6.84097	11.1319	7.79042	18.1551	21.4999	20.2386	1.9697	8.00712	5.33133	30.9976	1.33524	1.76054	11.6648	17.6981	0.730383	5.58657	7.89291	17.5359	32.1758	2.64675	2.36945	23.5398	47.175	5.19031	2.51424	28.2942	33.1924	6.41581	3.47668	1.76054	6.71181	1.36261	2.75063	1.13837	10.2523	4.0902	48.5963	18.2066	17.6635	2.54217	75.57	16.5124	26.0532	13.3552
CACNA1E|777	0.0128587	0.138197	0.163914	0.136031	0.205198	0.0622631	0.359367	0.176909	17.0754	0.0832431	0.291012	0.110585	0.574851	0.0473741	0.074445	0.0732269	0.925555	0.0419599	0.341229	0.0280184	0.0622631	0.319572	0.52274	0.0862209	0.230103	0.355035	0.351922	0.0878452	0.0947482	0.324851	0.0939361	0.487277	0.14889	0.0879805	0.0879805	0.428533	0.0270709	0.117217	0.210612	0.257174	0.0618571	0.0644288	0.755008	0.313481	0.510558	0.163644	0.40471	0.275447	0.20804
CACNA1G|8913	0.609134	0.622655	2.49421	1.32299	0.6359	3.4742	1.26725	0.142936	1.30339	0.440673	0.451573	0.247517	0.221302	0.0965784	0.935155	0.119619	1.20985	0.172737	0.159492	0.098372	0.436534	0.381209	0.165701	0.280629	0.50745	0.458471	1.22751	0.482478	3.80988	0.711369	0.320226	1.73413	0.062638	0.147351	0.102235	1.00731	0.403008	0.525386	0.434741	0.0856788	0.305602	1.30822	1.46427	1.46482	0.412114	0.413769	1.00911	1.18598	1.57105
CACNA1H|8912	0.453285	78.7633	7.23066	24.2968	28.865	23.1891	3.61363	70.0895	2.99051	140.036	35.9786	1.22871	3.92019	9.92068	43.0993	5.12141	3.59611	3.018	1.17616	2.0562	36.2294	66.7564	4.32287	101.48	14.5156	2.81046	7.87056	13.8433	3.23358	97.7939	177.333	4.4382	35.6192	16.6285	84.8175	12.6684	0.817275	23.6805	3.08345	4.39148	2.46496	10.3698	14.9971	6.7871	18.5219	13.5591	2.76521	3.87324	65.3102
CACNA2D1|781	25.4719	15.9316	11.5081	2.74149	11.5096	32.0688	24.6187	16.2555	4.48299	9.00074	21.1664	2.90717	10.2234	5.44712	4.50222	0.721154	1.902	10.2788	24.6564	0.184911	2.16642	2.60577	0.798447	2.12426	8.01886	2.79919	3.53772	0.382766	2.277	3.01257	10.007	4.75111	1.70118	6.09985	0.147929	10.4286	0.79216	1.26109	1.53883	2.34837	2.39904	6.89645	20.5758	10.7152	3.52663	7.31065	11.5962	13.0784	3.76627
CACNB3|784	33.4598	52.4366	167.156	38.1153	35.5243	77.7878	60.7174	41.2004	189.044	200.032	34.4035	95.6186	48.9727	171.867	45.7428	56.6839	54.7104	50.329	63.8957	52.2458	91.1463	48.8522	65.934	71.1485	19.2649	81.0789	49.4304	80.4978	59.6588	23.6533	63.2546	36.0693	119.726	58.4595	183.405	43.9388	17.2856	68.937	54.6717	83.6378	56.5704	89.5604	33.3578	72.3113	173.655	119.292	26.1754	69.0704	43.3552
CACNG1|786	0.0789889	1.54028	17.4708	13.2235	13.4344	32.1603	0.653239	0.513428	0.390995	63.293	0.394945	0	0	0.236967	9.33649	0	0.0789889	28.075	0.43049	0.118483	25.7093	0.987362	0.236177	2.21169	2.29463	0	12.2536	8.90758	13.7022	99.3744	11.3649	0.0394945	3.22038	0.987362	0.236967	25.1027	0.0789889	0.614534	0.329384	1.01501	79.6414	5.86256	1.73776	9.37678	2.44392	10.5972	1.02686	0	27.1011
CACNG3|10368	0	0	0	0	0.00407257	0	0	0	0	0	0	0	0.0136986	0	0	0.0370233	0.370233	0	0	0	0	0	0.0370233	0	0.0011107	0.0370233	0.0370233	0	0	0	0.00518327	0	0	0	0.0370233	0	0	0	0.077749	0	0	0	0.0370233	0	0.0740466	0.0240652	0	0	0
CACNG4|27092	5.12688	90.539	278.588	157.118	223.15	392.58	35.2658	166.359	48.9497	921.826	27.0648	0.868413	5.11127	19.2417	173.497	1.01148	3.90079	588.805	16.4931	1.66264	418.818	93.5449	16.9146	111.928	123.403	0.12982	88.0447	368.781	366.945	407.96	307.435	15.2976	280.14	9.19017	2.22343	236.664	4.22137	4.55284	6.08684	30.4516	427.331	76.2184	172.777	814.578	83.2985	540.73	68.3115	0.0883132	451.597
CACNG5|27091	0	0	0	0	0.0628507	0.112233	0.013468	0	4.76992	0.3367	0	0.0561167	0.013468	0	0	0.112233	0	0.013468	0.16835	0	0	0.112233	0	0.0965208	0	0.0561167	0	0.0606061	0	0	0.026936	0	0	0	0	0.0213244	0	0.0561167	0.0213244	0	0.0246914	0	0.0246914	0.026936	0.013468	0.026936	0	0	0.0246914
CACYBP|27101	58.4428	123.806	251.077	97.8922	92.2257	112.976	164.604	199.497	465.15	235.856	159.154	277.408	397.62	112.15	106.237	171.006	359.079	229.585	226.374	239.104	179.877	124.397	200.077	302.565	100.152	353.906	75.233	306.026	190.296	279.196	195.835	142.137	232.575	248.055	125.254	101.532	208.807	204.773	175.54	264.831	283.695	277.005	195.326	185.706	143.642	189.428	68.7287	433.605	188.15
CADM2|253559	7.74118	0.103734	0.803942	0.949948	0.185166	0.427905	0.570539	5.57573	1.40041	0.570539	3.77334	1.24481	0.440871	5.92583	2.30809	0.311203	0.094917	0.28527	0.473288	0.0129668	3.81432	0.0259336	0.418309	0.649118	0.0311203	0.0518672	0.905083	0.401971	1.05394	5.23859	7.04098	1.17998	0.0907676	0.0129668	0.531639	1.28371	0.0129668	0.303164	0.155602	0.235477	5.75882	0.752075	6.75571	5.09673	1.10218	5.62941	1.65975	8.59699	2.87863
CADM3|57863	0.393013	10.9022	11.9467	14.1048	7.3559	3.20961	0.426638	27.1376	41.941	3.05677	2.83843	1.8559	9.54148	0.917031	4.57467	4.64716	11.0873	2.00873	4.84716	0.174672	3.80218	0.480349	4.06594	4.79563	28.7118	0.611354	5.43668	0.764192	0.393013	1.68122	5.95153	11.9432	0.764192	0.502183	0.787336	10.0974	0.480349	0.820961	15	1.63755	1.59389	4.41703	12.9039	36.2939	7.34847	7.76594	40.6664	0.80786	1.3786
CADPS|8618	0.020591	0.448046	0.516111	0.371783	0.49857	0.810867	0.676835	0.209724	5.87188	0.36225	0.532888	0.0972355	0.238704	312.375	0.943756	0.0972355	0.532888	1.17655	0.0968541	0.0781697	0.0953289	0.190658	0.326978	0.123928	0.0571973	0.184557	0.695901	1.01354	0.448046	0.79123	0.555958	0.0381316	0.231649	0.439085	0.0804576	0.715539	0.0589133	0.401907	0.13346	0.0190658	0.257388	0.579218	0.412583	0.34795	0.984557	0.11878	0.49571	0.114395	0.915157
CALB2|794	1.12915	17.0014	6.04305	4.16373	5.4693	44.2209	3.77558	35.7798	13.7968	5.10656	1.62315	2.89344	4.09315	2.95766	5.25759	215.159	137.33	24.302	88.0261	46.6478	13.9026	19.8306	2.05222	11.8878	9.10021	27.8391	18.9689	11.2915	4.33169	5.08116	247.743	4.94001	2.85815	24.4531	5.57516	41.8405	68.5723	23.6062	356.281	1.65843	13.4778	15.5215	69.6457	8.47424	6.31616	4.30487	7.86874	3.87932	14.1143
CALCOCO1|57658	118.441	120.129	173.739	108.262	104.807	142.082	88.5775	85.3922	140.959	106.496	69.4253	53.1479	60.2809	89.7132	114.009	53.4089	111.922	46.5003	78.8269	70.8723	271.337	39.7749	118.637	128.371	78.9846	63.5377	109.203	179.146	90.977	119.163	191.035	160.867	60.6458	60.7453	90.2439	138.049	19.5154	37.7955	49.8433	148.592	115.205	169.523	181.001	209.682	106.568	208.958	171.092	421.967	113.837
CALCR|799	0.029036	0.36295	0.159698	0.161731	0.612369	0.697445	0.611789	3.39721	0.122242	0.522648	1.3525	0.116144	0.178281	0.232288	0.885598	0.116144	0.541231	0.0891405	0.0969803	0	0.0325203	0.116144	0.296748	20.4631	0.319396	0.205285	0.14518	0.029036	0.348432	0.0589431	15.4573	0.43554	2.04849	0.35453	1.62602	0.522648	0	0	0	0.14518	0.058072	0.383566	0.87108	0.234901	0.166376	0.284262	6.44309	0.221835	0.029036
CALHM1|255022	0.171466	0.26178	0.212696	0.278141	0.065445	0.294503	0.171793	0.638089	0.490838	5.42997	0.258181	0.163613	0.313154	0.178338	0.276178	0.278141	0.46695	0.233312	0.383835	0.294503	0.356348	0.138743	0.400851	0.591623	0.586387	0.425393	0.419503	1.75229	0.0327225	0.179974	1.30792	0.156086	1.87696	0.147251	0.249346	0.335079	0.163613	0.414921	0.549084	0.163613	0.278141	0.196335	0.418848	0.164267	0.435537	0.994764	0.163613	0.314136	1.02258
CALML3|810	59.6759	61.798	91.7519	76.9962	12.7005	108.366	7.23886	86.6014	14.129	1.97389	7.64055	4.86329	2.91475	4.85561	12.7773	123.409	40.7719	5.75883	1.31336	0.883257	0.0768049	1.07527	4.96544	6.04455	6.04531	0.960061	78.775	6.2235	0.0768049	224.379	5.21813	118.776	1.30568	13.3303	33.9531	58.9593	0.15361	1.74962	11.2512	4.33948	4.11598	56.3664	13.9969	168.3	0.115207	2.93702	91.7304	0.230415	268.134
CALR|811	1569.67	2211.18	3730.4	2480.2	2041.46	4850.76	3301.68	2650.54	3476.19	7715.16	3659.78	4669.81	5516.83	3407.7	2438.14	5595.19	7607.36	2669.75	4694.9	3168.45	3358.87	6294.47	6061.8	8725	2326.24	3922.71	2303.11	4120.16	3421.4	3188.49	4424.04	2476.92	4717.9	4036.26	4549.47	4240.66	5810.89	5446.2	11773.6	1793.33	1927	3394.25	4114.52	3605.06	5162.71	5034.31	2229.97	3451.79	2927.27
CAMK1G|57172	0.0446749	0.598325	0.159553	0.0598325	0.0797766	0.0797766	0.165138	0.344236	4.74671	0.119665	0.139609	0.219386	2.12006	0.777822	0.0797766	0.279218	1.8209	0.458716	0.977264	0.319107	0.23933	0.538492	1.46071	0.797766	0.378939	0.925409	0.0398883	3.48305	0.299162	0.378939	0.260471	0.159553	0.71799	0.638213	0.245712	0.339051	0.283606	0.279218	1.3562	0.438771	0.977264	0.119665	0.95732	0.411647	1.74112	0.370164	0.319107	0.444356	0.279218
CAMK2N2|94032	0.661765	1.24412	1.875	2.64118	1.06618	3.15147	8.70662	2.38676	77.6566	9.71471	3.91691	5.21985	20.6015	1.61103	0.955882	9.73676	3.80809	1.13971	13.3728	12.1956	3.23529	3.20441	2.24191	4.6375	5.35294	2.29191	1.875	7.84706	3.32353	8.05662	11.2147	2.77279	4.41176	2.25882	1.10294	2.82794	1.74779	3.36838	6.09853	0.698529	4.77941	2.48676	1.57059	3.58162	1.53309	11.1324	1.39706	8.79706	2.47794
CAMP|820	0.135318	5.12585	8.90798	2.25169	1.1502	1.62382	1.4885	18.4709	34.4966	287.697	13.2179	0	15.5494	1.75913	1.21786	9.5318	1.75913	4.93234	2.30041	29.9432	1.69147	34.2152	1.82679	8.56563	1.21786	0.518268	1.35318	28.1069	0.541272	0.135318	9.20162	0.405954	10.7578	27.8106	13.2706	1.37348	0.405954	0.67659	8.07713	0.67253	12.9905	6.56292	48.2639	0.811908	4.10825	15.9675	0.405954	8.55616	5.54804
CANT1|124583	90.9531	184.782	274.967	226.337	169.22	373.778	142.776	213.093	145.535	633.942	223.164	443.697	224.363	353.144	157.488	130.266	139.717	270.639	126.087	66.8636	226.546	200.343	233.032	232.242	91.5746	101.912	92.1937	123.815	217.112	549.538	670.661	105.373	419.967	239.035	116.47	424.384	50.9257	256.536	153.742	166.326	257.773	241.399	261.117	238.489	331.059	492.177	157.134	205.155	298.06
CAPG|822	124.36	444.325	678.223	325.528	630.796	549.404	649.726	688.997	272.925	585.901	435.397	689.031	1137.87	134.027	615.048	586.708	1039.87	842.685	1022.23	288.552	1105.81	316.213	705.931	860.267	729.913	1210.5	596.679	1723.64	879.053	513.204	1149.59	217.364	1178.39	362.864	609.477	545.877	246.54	502.136	1300.12	303.742	411.914	896.448	1158.33	735.879	829.452	1990.39	233.526	314.856	898.757
CAPN11|11131	0.46875	3.92604	5.29167	3.19844	0.9375	1.5599	0.7	2.57865	0.50625	1.89948	0.833333	0.833333	1.47188	0.876563	0.801562	1.48177	3.89062	0.625	0.78125	0.442708	1.3974	0.494792	2.15781	3.12812	2.26042	0.967187	3.04688	2.77552	0.885417	0.677083	4.41094	3.98438	1.3099	1.31563	1.07083	6.81771	0.104167	0.6625	1.95833	0.546875	2.60156	4.30469	4.71719	4.94115	2.66146	2.18021	12.976	8.84688	1.29948
CAPN13|92291	7.71965	58.1795	108.322	72.6168	39.9794	40.8374	50.1379	59.9491	67.4306	75.2243	184.112	2.00772	48.5149	22.0057	79.714	3.50566	3.65021	41.4439	0.497428	0.385802	118.148	103.707	109.602	41.7788	22.5916	0.308642	53.589	201.077	34.9949	68.588	95.1564	41.7155	247.161	144.636	341.319	49.464	25.4115	70.8894	2.00617	233.173	102.41	157.586	86.9352	65.6842	56.4588	103.263	59.8025	187.807	33.8081
CAPN3|825	13.2844	5.9588	4.79074	2.16916	4.50893	4.54138	4.37805	2.93401	7.01604	6.10463	2.716	1.8611	3.91469	1.49471	5.5381	9.33431	8.15239	2.86365	6.65148	3.79147	4.94058	2.00109	16.412	27.1003	10.9639	8.0237	4.66533	11.0401	2.22749	1.31243	8.35727	6.8148	5.39555	2.58841	5.2366	5.48852	0.947867	11.9781	4.13781	6.80459	5.03828	3.57856	10.0933	4.2665	7.31681	3.77652	8.02771	5.45425	4.95443
CAPN6|827	50.3467	6.7894	19.0834	6.87776	1.83476	1.39912	2.78675	8.9673	0.0294551	1.07511	0.149043	1.23711	2.06156	3.00442	0.559647	83.5493	477.386	1.45803	21.9962	1.45803	1.34021	0.441826	0.793814	8.2542	9.00177	0.824742	6.81767	2.78351	0	0.368189	2.32695	16.2297	4.78351	0.294551	3.94698	12.7128	19.5287	0.17673	83.0306	2.2975	4.89956	1.34021	7.68571	7.95258	0.356701	5.59647	29.729	0.677467	0.868925
CAPN9|10753	2.37105	5.11647	10.9609	13.7042	1.87396	13.1547	13.6647	2.80782	1.83028	15.2392	24.7483	2.78702	9.85857	5.19967	0.977537	4.6589	0.374376	7.58943	0.436772	0.228785	0.478369	5.17887	0.030782	5.80657	0.145591	0.0906822	2.39185	32.213	16.1793	1.91348	7.3881	18.463	23.0241	22.0216	13.3423	3.45632	0.915141	0.603161	0.315724	46.2521	14.1639	16.3694	15.6614	2.70383	9.9272	14.6057	4.78369	29.3428	4.78369
CAPSL|133690	0.199402	6.53041	2.89133	3.38983	6.87936	1.94417	1.54536	0.299103	0.598205	2.74177	6.58026	2.39282	1.25723	0.398804	8.77368	0.398804	0.299103	4.28714	0.199402	0.448654	0.398804	8.42473	0.0997009	0	0.697906	0	18.5942	20.4387	45.2144	1.09671	1.06879	20.6381	0.797607	0.847458	0.706879	0.398804	0.697906	0.299103	0.299103	0.598205	1.49551	0.299103	30.0598	0.498504	3.54835	0.808574	4.73579	49.4955	5.58325
CAPS|828	94.1673	36.3836	97.8041	37.4517	275.517	23.4905	59.5312	229.144	193.697	71.8702	97.3919	121.858	203.365	27.7863	82.119	81.7137	699.466	10.3518	909.295	42.6686	78.8181	249.951	26.1228	491.89	62.0363	48.486	103.108	99.9866	63.9599	114.38	219.095	81.3308	235.887	247.255	390.928	65.6018	203.964	145.223	315.517	112.609	75.8314	15.0045	45.5935	15.07	1029.72	58.5515	19.5522	30.3989	133.781
CAPZA3|93661	2.67281	0.270046	1.33641	0.368664	0	0.184332	0	0.184332	0.276498	0	0	0.368664	0	0	0.0921659	7.28664	0.20553	0.0921659	2.43502	0	0	0	0	0.184332	0.0921659	0	0.829493	0	0	0	0	1.56682	0	0	0.276498	1.45346	0	3.96313	0	0	0	0.147465	0.184332	0.276498	0.138249	0.0921659	1.47465	0	0
CASC5|57082	2.07398	5.97815	11.5226	1.48405	3.95112	4.32103	11.3777	8.53692	19.6649	8.31099	14.7547	32.1689	11.048	4.4653	1.85056	2.17927	5.24882	10.9414	14.7242	4.07487	4.2057	2.62832	9.30154	8.01698	7.4842	15.4733	0.280567	3.66273	1.62434	3.26994	7.48597	0.851447	11.5797	5.38098	2.0443	1.48405	8.21515	7.09185	18.446	1.22563	10.219	5.74084	3.39634	2.56497	10.758	26.7044	2.73922	8.00945	6.51787
CASKIN1|57524	5.0511	6.39579	13.4883	7.08341	18.869	8.39333	5.24864	16.1419	10.8025	15.0766	4.71115	9.84214	17.5162	6.68165	15.5071	21.4899	7.56506	7.98139	8.56242	22.0862	18.2479	8.82054	9.53398	19.4759	3.79333	10.1838	19.5673	21.3909	8.2878	11.2773	16.0911	7.10132	10.1303	9.71905	10.8648	9.15487	9.28306	11.2982	8.19965	11.197	11.2597	8.07217	8.43161	5.01229	8.84636	9.81598	3.52695	11.9738	18.712
CASP12|120329	0	1.60085	0.533618	0.266809	0.148346	0.373533	0.266809	3.25507	0.0533618	0.106724	0.320171	0	0.0533618	0.693703	0.533618	0.266809	0.373533	0.266809	0.0128068	0	0.910352	0.106724	0.957311	1.65422	0.320171	0.373533	0.358591	0.960512	0.863394	0.426894	0.58698	1.44397	0	0.640342	0.0128068	0.58698	0.106724	0.320171	0.320171	0.106724	0.480256	0.54429	0.960512	0.869797	0.54429	0.139808	1.54749	1.01387	0.815368
CASP14|23581	0	0.275634	0	0	0.220507	0.556781	0.606395	1.70893	1.81918	0.441014	0	0	0	0	3.29658	0	2.09482	0	0.0551268	0.661521	0.110254	0.716648	0.400221	9.97685	37.3208	0	40.8456	0	0	0.661521	0.0154355	0	0.220507	73.4708	7.33186	0	103.143	96.5755	0.110254	0	0	0	0	0	0.606395	3.51599	0.110254	0	6.7806
CASQ2|845	2.07308	7.40385	6.21192	3.21154	2	1.53769	1.52385	10.2185	0.665	0.865385	1.23077	0.942308	3.44231	4.09615	1.37	3.57308	2.15385	1.30769	1.41577	3.19231	1.26923	1.87654	0.769231	3.09615	1.61538	0.615385	4.595	1.76923	0.153846	3	36.345	5.11538	1.05769	1.69231	1.01923	2.24769	0.153846	0	1.26923	0.865385	7.36308	1.71154	13.1815	4.23462	0.0396154	3.66077	5.49462	2.78846	2.34615
CATSPER1|117144	0.164768	0.55467	0.647304	0.220577	0.748292	1.05657	0.522399	0.993926	0.0759301	1.66135	0.18489	0.15186	0.827259	0.322703	0.911162	0.534169	2.55163	0.493546	0.882308	0.265756	2.1921	0.465452	1.13136	1.59681	0.899393	1.28815	1.64541	4.08238	1.34169	0.660213	0.653759	0.483675	0.15186	0.47836	3.50494	1.61162	1.69248	0.371678	1.09188	0.0652999	0.131359	0.929765	2.19514	1.9833	0.647304	1.41268	0.205011	0.815869	0.652999
CAT|847	220.553	313.071	391.354	145.909	181.341	283.47	234.268	367.287	268.279	765.896	228.203	927.558	341.206	455.403	181.453	136.438	199.987	126.861	152.645	242.914	179.615	110.25	275.33	201.161	178.411	71.1499	197.872	448.522	282.528	364.216	256.324	268.115	275.194	244.814	403.864	263.696	82.8879	131.718	258.243	363.041	219.313	401.971	484.698	492.949	346.69	367.001	324.562	332.281	107.484
CAV1|857	152.317	190.322	200.093	101.119	56.178	249.404	85.0412	319.035	18.9473	134.504	63.9993	50.4767	149.971	70.3288	83.4499	58.8775	98.332	63.596	60.1143	37.7686	191.794	61.3836	72.7117	206.93	116.029	43.5684	143.946	74.6934	95.0043	92.7554	201.153	186.972	25.5176	84.8181	31.7668	303.853	150.485	48.3134	134.337	37.6769	153.737	155.876	445.92	261.28	94.1751	95.8059	405.642	74.5498	106.023
CAV2|858	239.582	189.844	145.04	73.6756	40.4535	184.927	73.5482	213.598	57.4283	135.322	56.3638	54.4409	376.002	50.15	68.6018	97.0763	59.4686	53.7234	51.4996	72.0034	112.963	77.6781	60.4208	140.07	93.7946	111.438	105.411	55.1014	64.7687	77.0838	129.075	144.287	20.3026	97.192	119.245	175.742	191.518	61.8231	160.235	30.8743	73.6303	148.806	302.744	222.834	50.0285	73.3822	371.598	72.9489	95.1517
CBLC|23624	16.7523	17.7332	109.268	94.8614	46.8791	46.387	29.8364	56.5959	39.1176	89.6156	48.1465	49.3502	97.1452	246.271	52.3298	86.4862	95.5558	84.7162	42.3449	57.6472	96.3167	16.0197	0.624179	48.1373	24.1748	65.136	48.088	98.5499	82.5177	72.3962	125.237	43.2727	57.0749	0.65703	140.265	44.498	53.6564	0.829172	67.5039	65.6551	82.998	91.1761	73.7162	55.5907	0	64.0388	30.7011	56.295	66.0473
CBLN1|869	0.0987654	0.276049	2.16543	0.320988	0.246914	0.592593	2.18914	4.88148	0.197531	0.296296	6.67407	0.0493827	7.18617	1.57037	0.934321	0.253333	0.419753	0.641975	0.342222	0.197531	0.54321	1.26519	1.4563	0.351111	4.29333	0	0.419753	0.17284	1.45679	11.0326	1.8716	1.52346	4.88296	0.716049	2.30963	1.59802	0	72.041	0.246914	0.395062	0.577284	0.197531	1.35802	0.567901	0.592593	0.320988	4.16889	0.0553086	1.29877
CBLN2|147381	0.151618	0.150489	3.72272	0.112867	0.0376223	12.6599	1.31678	1.05342	3.06245	52.0278	39.2272	0.300978	0.84161	0	70.8672	0	0.341234	0.0801354	1.07223	0.112867	71.3299	0.0376223	0.376223	0.606471	0.0425132	0.661776	57.4413	0.0376223	268.351	36.5952	0.869074	0.263356	0.206922	0.0752445	0.0376223	4.60873	0	0.248683	0.545523	0.0421369	0	56.6095	0	1242.17	4.4447	11.7291	0.263356	41.2833	0.225734
CBS|875	41.1344	13.9062	22.2758	3.96484	1.97266	18.3676	4.96992	6.40469	379.765	33.3125	5.05859	307.034	197.509	0.507812	1.09375	35.8793	2.56797	19.691	111.766	123.021	14.691	13.7285	29.1652	145.707	90.6953	112.027	2.51953	50.4352	28.7617	26.4301	62.4867	9.10156	5.07617	57.198	278.648	7.2957	8.98203	64.5379	169.108	15.7473	16.8664	13.0957	2.93594	7.36797	143.657	14.318	5.78125	59.9422	6.41719
CBX2|84733	38.409	9.8294	9.7917	5.24181	5.58606	6.37167	11.591	5.90708	196.209	9.59863	37.3069	241.422	188.292	1.92308	4.37243	155.256	63.195	1.67708	160.872	106.789	13.056	32.0221	28.318	29.9577	62.6984	205.022	24.7589	17.6851	5.2997	15.3686	16.1855	4.49924	27.7391	84.0933	112.064	5.85491	32.0461	206.597	58.5708	32.468	8.51637	3.35339	9.32978	9.05255	77.7087	3.33587	1.50419	1.57197	36.0137
CBX3|11335	308.045	594.627	852.181	573.614	433.78	431.164	472.66	826.517	1972.98	790.397	638.661	2056.97	928.278	316.922	573.891	411.28	820.695	942.991	787.99	714.268	1259.71	439.06	721.983	1030.52	606.927	736.039	336.814	952.451	625.992	1045.79	895.449	593.764	2241.59	562.648	671.63	370.187	627.917	638.477	712.908	546.302	645.445	720.935	617.499	702.698	696.868	926.356	386.099	896.254	1178.51
CBX4|8535	41.6343	54.8226	80.0324	66.7409	76.6599	66.0919	53.1435	43.887	55.9849	139.691	95.3702	93.0987	132.513	62.4945	41.8768	84.1691	45.5386	100.571	54.7171	30.4927	73.4411	55.2151	52.8437	94.4083	73.9183	56.3153	90.606	220.53	146.686	178.342	86.716	91.6663	84.0814	71.6128	161.826	28.5454	20.2456	56.9751	38.7371	238.177	94.7571	37.1789	91.0407	56.8136	62.6203	44.5736	35.1823	79.0448	267.127
CBX7|23492	16.1341	42.539	83.0574	32.8211	32.873	40.6035	20.4392	95.6912	15.2182	50.7064	20.4117	9.09979	14.4096	68.2742	20.9219	18.5982	39.3313	11.6836	30.8588	21.5951	36.9196	9.89209	35.0204	33.7132	46.1375	14.6585	37.7216	85.4772	15.6985	36.9343	74.6456	56.0587	8.05395	10.1642	19.5948	72.7056	11.8093	9.98821	26.6849	21.7512	41.4966	63.9083	62.3444	95.6215	28.8486	107.557	85.7247	140.449	22.0456
CBX8|57332	19.2218	13.8813	18.3457	14.8833	17.2782	19.1051	9.67185	12.6946	31.5642	49.0629	22.9903	41.5811	42.6031	12.8476	10.7114	42.1518	25.2257	13.1096	32.5156	29.6569	23.7834	10.8113	29.7393	35.382	19.1388	24.7685	18.6518	65.3684	11.9792	44.1479	24.4974	16.4494	23.749	18.9643	57.5746	12.142	9.84565	22.9754	19.7821	76.8035	23.7023	23.3658	18.6044	16.7354	21.3846	13.2879	7.15759	35.9228	62.9416
CCBE1|147372	0.737059	2.02263	1.81316	3.16524	1.83442	4.29997	0.943435	4.37093	3.04525	2.74254	1.26088	1.98766	2.26431	0.54748	1.72712	1.63524	2.494	1.58176	2.77683	1.71409	2.74974	1.2818	2.30237	4.43949	2.44018	2.2866	1.93692	9.3555	0.857045	0.874186	2.15667	3.97017	1.30271	1.23414	2.47789	2.25094	0.803565	4.96915	2.24546	8.44498	1.52554	1.70826	3.0168	1.55228	2.50223	2.2626	3.35962	1.86836	2.00377
CCDC129|223075	0.543216	0.0965717	1.01787	0.362144	0.0521487	0.350072	0.0275229	0.169	8.89063	1.53308	0.0241429	23.9087	7.62023	0.0724288	0.108643	3.36987	0.13013	0.097296	2.91429	0.0482859	0	1.16707	0.046113	0.0849831	0.0241429	0.0615645	0.700145	0.0388701	0	0.0724288	0.159826	0.662482	0.398358	0.00362144	0.760502	0.481893	12.0162	0.0270401	0.169	0.124095	4.14462	0.0567359	0.218011	0.583535	0.133028	0.0475616	1.13761	0.181072	0.0120715
CCDC136|64753	1.83929	2.16393	4.28964	1.60714	0.589286	1.96429	1.16071	3.02179	30.8436	3.8	1.01786	3.5875	3.67857	1.30357	0.714286	1.05357	2.63214	0.851071	1.41214	7.08929	1.10714	1.73036	2.66393	2.71071	4.08929	0.81	1.32143	5.64643	5.01393	1.42857	3.88179	2.64286	0.571429	2.48214	0.866429	2.8775	4.655	0.701071	1.64964	0.551786	0.946429	3.00357	2.94643	3.68357	2.06964	2.18179	6.37321	8.95357	2.19679
CCDC137|339230	21.7551	30.2359	52.6919	34.5913	28.8512	60.5177	41.2942	74.7068	62.8044	95.5296	25.0284	172.878	212.814	33.0204	31.2892	223.72	92.6182	61.5087	85.5759	59.3554	65.3161	48.3186	85.3823	150.713	49.7875	118.948	40.4818	74.4286	34.7855	44.896	84.8342	19.8357	88.9094	88.4788	102.184	48.3738	55.6446	62.6675	99.3081	31.2653	67.5908	44.2071	54.8905	58.996	80.6755	47.2469	20.8442	101.69	75.2593
CCDC141|285025	0.231379	0.58373	0.910724	0.264131	0.556524	0.303751	0.673798	0.539884	0.412309	0.589276	0.936609	0.454569	0.944797	0.987586	0.198098	1.03117	1.52826	0.277866	2.07501	0.72187	0.508452	0.145272	1.19572	1.7673	2.08347	1.028	0.156894	0.713682	0.213418	0.501057	0.95906	0.501057	0.466455	0.950872	0.404913	0.535658	0.211305	0.667195	0.575806	0.618595	0.486529	0.614369	1.42631	0.488906	1.51004	0.536714	1.54226	1.3402	0.498679
CCDC151|115948	0.706714	1.08531	36.7491	4.16254	3.59364	1.00959	2.6108	2.19586	11.5401	9.3892	0.757193	1.21504	1.66583	2.97829	2.21656	0.612317	0.908632	0.759717	0.773852	1.38819	1.88339	8.42908	3.80262	1.32711	1.16103	0.914185	1.66583	40.261	5.80515	3.25593	7.47097	12.6199	1.29076	0.933872	0.955073	0.933872	0.908632	2.01918	0.326098	20.6966	1.25341	2.19334	1.38617	2.51489	0.310954	8.75366	1.08531	20.107	1.43867
CCDC152|100129792	82.9322	91.0332	128.892	51.4529	41.59	95.612	45.9865	82.3745	22.4831	69.8562	36.8506	13.8538	32.4332	58.1156	49.9266	38.3475	35.6765	27.4288	15.2322	8.83475	54.6228	37.6842	412.403	109.64	151.229	11.0919	41.3543	37.4426	52.8829	125.682	54.7502	72.7913	25.5797	292.765	86.0728	87.555	51.9519	31.9049	18.125	91.899	65.6296	26.8124	131.125	204.771	69.9853	258.866	216.466	122.023	95.8761
CCDC154|645811	1.0362	2.61312	1.55581	11.0302	8.51207	0.622172	5.30392	0.490196	1.29713	3.49246	4.07014	0.968326	1.06637	0.15083	3.43213	0.78733	2.05279	1.0098	0.687783	1.16893	3.22097	2.56335	1.35596	7.52489	1.71267	2.06863	5.30543	5.08824	1.60633	4.31976	4.78507	1.49774	2.21569	4.11388	3.44042	6.07164	0.678733	7.20287	1.02338	1.50754	5.14329	6.319	7.04751	1.97436	1.34012	0.866516	0.998492	5.86576	2.55656
CCDC157|550631	3.00461	1.85008	12.0906	5.09588	6.45997	4.5117	4.19769	2.13443	9.50807	6.21582	1.94794	4.12685	4.77595	2.66557	3.88468	2.5855	3.28007	3.10379	2.16804	9.63756	1.84217	5.43031	5.67974	4.71796	3.34069	2.64843	4.43493	13.6329	5.8547	3.77957	5.77529	4.67611	2.50972	4.55914	4.36639	2.57298	1.56442	3.91565	4.2369	6.58122	4.61285	5.46293	4.15717	5.01845	7.12949	8.65404	3.72817	7.34761	5.74135
CCDC158|339965	6.47769	2.89651	4.19498	1.01912	0.419948	2.5883	0.985752	1.61792	3.24634	1.49344	2.88526	1.84739	3.91489	0.112486	2.96588	0.320585	0.586802	5.08511	0.112486	3.7619	0.946757	0.324334	1.55906	1.68054	0.576678	0.224972	2.44807	2.53431	3.02662	1.12861	6.23435	3.88039	0.0374953	0.224972	2.7814	1.53206	0.403825	0.131234	0.149981	3.46907	0.453693	1.86314	9.70304	4.14736	0.577053	2.89839	5.11736	0.552681	2.55981
CCDC19|25790	0.899673	5.62595	31.1412	39.892	24.7699	7.53708	29.1609	2.20829	2.91439	13.0044	13.247	2.50818	6.5349	1.18484	22.0485	6.02181	6.95311	7.79117	6.00218	2.45365	3.0687	9.78408	2.20829	23.5883	6.91549	7.38332	10.9051	95.7814	31.5131	10.9324	31.512	42.1947	35.7454	81.8212	4.6892	6.59487	4.74373	10.6723	7.18702	40.8402	13.6287	8.2699	19.3348	13.2857	11.1134	3.73501	3.38059	27.801	11.2595
CCDC21|64793	37.9699	14.624	36.3685	9.43983	18.4416	10.4279	35.0433	64.5532	118.572	17.8869	21.2223	61.0153	66.8345	20.367	17.207	13.1421	24.7331	29.5576	78.8073	20.5835	26.3823	12.3833	37.2925	27.9966	24.6771	54.7835	12.4868	25.4642	14.353	17.3275	40.6592	18.666	33.1994	11.3893	18.1364	19.0314	18.8784	39.2715	40.7176	21.6805	70.3192	39.7863	18.6011	16.0148	30.3579	97.3164	17.9564	55.5293	62.6349
CCDC24|149473	9.22658	23.2485	69.8917	66.994	55.0618	33.0346	22.7761	48.8013	24.285	125.08	12.2346	29.7615	28.5236	44.0505	46.1801	30.6811	24.2272	14.2757	11.6312	15.6957	78.3302	49.5814	112.626	79.6186	14.8525	11.307	60.3455	166.751	54.0193	28.2279	71.6678	50.4159	56.3967	9.88638	14.4206	36.9561	19.2884	41.109	12.6704	44.1635	35.1316	68.3821	30.1316	38.4053	47.695	66.1056	29.2718	59.612	80.1103
CCDC28B|79140	12.0658	7.69231	22.4786	11.3248	6.16838	21.4299	22.5111	21.3248	41.5325	29.9761	17.2957	140.265	110.521	16.9231	10.4444	36.2632	82.1068	10.7607	125.295	32.8453	33.2453	8.24359	21.2547	17.6462	23.4342	28.6068	23.2291	82.6419	24.1453	7.86325	18.8436	17.4786	5.94017	8.23675	40.3957	24.388	14.9145	9.7812	45.1983	4.86752	8.20598	26.9197	28.606	29.4991	33.9863	24.4829	7.81624	33.6538	17.2162
CCDC3|83643	8.50378	60.7587	35.8521	15.303	15.326	40.7092	29.8907	64.2613	1825.35	65.4996	10.1093	358.003	59.3941	21.2829	14.1396	43.2935	50.6645	6.48638	50.7886	87.2148	19.1668	23.3915	23.688	31.9773	18.778	18.5174	35.8355	16.5764	28.385	17.0949	81.2129	25.0189	7.37065	38.1331	20.0197	33.7273	6.6944	13.4924	30.8884	5.74433	15.0711	23.719	70.2405	62.3529	29.8283	23.1456	41.6271	12.4747	24.545
CCDC46|201134	7.67792	13.7372	13.804	5.36081	4.55147	18.5492	7.3469	13.2721	3.85634	39.2999	12.6779	24.6329	4.0566	3.0288	7.48097	16.1801	12.7077	3.88779	4.74677	2.9957	10.0381	13.7289	6.50281	11.0824	9.89738	3.57067	7.54386	5.07018	6.56041	4.11619	18.6352	17.956	4.61768	6.66998	2.20126	14.8908	6.33896	6.38861	9.40086	2.58193	7.91129	6.43992	14.813	17.1629	7.51738	6.08805	20.1059	4.25356	6.32241
CCDC50|152137	36.6946	37.9807	45.4685	20.4584	20.4105	61.5361	31.6982	44.8997	74.8504	44.5576	25.7826	59.379	35.2781	13.8441	25.4182	37.1789	43.642	24.0017	74.4164	14.9977	29.685	18.4116	23.4469	58.0394	39.5728	41.127	23.3777	32.4967	26.7261	28.4889	51.6599	46.6816	21.3153	26.9462	20.4836	39.238	36.2275	19.9909	48.4098	28.9278	30.3782	41.1298	67.1011	52.8634	38.6664	35.7546	49.1209	57.5324	35.1942
CCDC64B|146439	31.5776	32.5472	76.2623	68.7383	180.694	35.4611	48.6808	84.9266	8.56378	42.4578	37.82	10.5489	45.1806	14.1441	112.954	86.3689	27.9337	49.3495	55.3219	62.1883	77.2728	36.0458	39.7813	219.023	19.9586	125.42	83.9685	152.035	34.2363	34.0055	80.1209	50.6494	107.848	67.7184	134.353	31.0017	6.70182	43.9934	8.15075	96.6952	78.2789	50.1027	67.0779	48.788	82.6957	64.9017	37.3611	64.5306	74.8343
CCDC64|92558	2.0275	47.8533	16.299	15.931	42.0087	34.7058	48.6656	42.8612	207.517	111.344	86.3811	18.6521	64.5426	22.0842	18.6089	17.7329	29.0087	42.4483	24.5137	67.2043	58.7534	32.096	125.921	106.318	64.2863	32.2741	15.1222	87.8464	47.9118	34.2772	115.674	27.6015	74.0869	39.172	47.3614	9.12091	10.9467	45.6643	15.9808	32.3392	99.8066	27.1379	92.7791	19.1545	33.1362	76.969	12.8643	137.704	117.704
CCDC68|80323	0.37953	4.5262	6.49829	2.10578	3.31783	2.30044	1.16308	5.21523	0.0734574	16.3401	4.19809	0.122429	1.89765	1.98335	13.0583	0.284035	0.29383	2.58619	0	0	2.13026	0.697845	3.21988	2.1359	2.74119	0.29383	0.722331	3.03208	1.55705	1.83643	9.03501	1.99559	2.61876	0.110186	0.538688	0.46523	0.795788	0.171401	3.5382	0.0734574	0.0979432	5.61876	1.70054	2.69344	0.363369	4.99388	2.59549	0.345984	1.08962
CCDC69|26112	5.09633	39.0187	31.0452	23.811	20.0012	13.2492	17.1716	126.406	7.059	27.1343	24.4798	13.7252	47	10.7706	11.0024	28.1469	99.2658	9.74353	33.0193	6.18001	26.1517	16.177	76.4422	59.3359	103.145	23.7754	20.2255	15.2053	16.5548	19.1102	74.5036	28.4359	15.1231	8.382	12.9398	48.575	8.90728	10.9422	38.2074	13.5102	17.1996	17.0999	125.262	49.4359	76.3995	88.4642	40.1078	27.6818	24.6192
CCDC74A|90557	18.6094	27.3962	1098.15	76.0088	79.0223	62.1257	36.078	59.4789	131.632	95.6285	328.372	29.1154	78.2021	344.685	70.1543	16.9928	37.5497	334.436	38.2235	27.7247	635.278	25.9714	15.5489	139.657	23.3119	9.78282	104.31	1146.44	80.4694	222.23	86.642	249.139	70.0811	37.3278	31.1742	136.064	8.94988	13.5227	23.4208	748.689	112.544	1074.21	101.266	209.776	40.1527	148.524	68.3071	466.402	151.741
CCDC78|124093	1.34699	5.4432	9.07449	11.5171	31.0149	0.806952	5.77281	14.7672	1.70701	65.185	2.61453	5.94227	4.17318	1.76909	24.3818	3.68405	3.23153	12.0472	6.54749	0.651769	14.6642	0.846679	3.12973	110.773	6.22471	22.1316	38.37	67.4867	15.9174	4.48417	13.5798	8.93855	12.5282	11.9249	9.90068	7.66977	3.20857	4.83675	1.34451	16.6816	28.6462	20.2135	7.87399	10.5798	14.4966	4.60708	1.19056	25.1124	12.5158
CCDC80|151887	34.8338	217.122	446.382	229.119	101.357	985.142	504.121	395.638	32.6436	274.518	167.787	45.9748	119.6	73.8595	177.725	116.243	171.188	72.6242	62.4173	68.0449	255.545	281.382	113.456	154.6	313.867	181.488	201.062	75.9307	167.762	63.7658	298.131	241.876	49.3083	209.933	31.183	415.767	11.2264	98.8461	164.606	84.4787	51.938	199.778	480.191	601.511	136.296	227.415	275.35	56.4845	125.616
CCDC82|79780	37.2575	17.1661	18.3359	7.15686	7.66926	25.1635	14.5131	17.832	76.9168	21.0858	10.7843	95.1225	33.5705	7.95265	10.6045	19.7484	33.9956	5.66038	51.6992	32.3563	11.9808	9.07621	11.9193	19.3237	22.6774	31.2849	12.2741	6.47873	8.17425	7.22013	10.6715	17.7747	4.96707	10.6837	8.36552	19.9808	20.3722	9.13836	33.0459	8.54606	6.34295	11.4554	34.2712	21.9656	15.3533	14.0366	23.8365	10.3278	13.3833
CCDC85A|114800	6.04795	1.86292	3.41978	1.98343	22.9139	5.3658	2.75546	12.2744	1.63595	11.0731	1.33668	1.31233	1.44489	30.9094	4.56314	0.527241	0.527241	4.47577	4.59327	0.213407	2.92242	0.746673	0.922671	2.89229	1.0708	0.77178	2.23701	1.37459	3.55837	1.53377	5.95405	2.79488	1.10469	1.14738	7.64223	7.13533	0	0.304795	0.663319	1.04896	1.64374	2.33894	3.94702	5.33241	1.74642	13.2649	7.20261	1.55009	28.4991
CCDC87|55231	0.591424	9.46484	5.17187	2.66724	4.11698	3.56569	1.19828	9.15918	2.05832	18.8185	24.4813	3.1482	2.61647	1.69708	1.73345	0.442196	1.1458	2.2446	2.19005	0.274443	2.41029	2.6518	7.76604	2.07822	1.74683	0.51458	2.20823	5.94854	3.07033	11.8967	7.58113	2.02127	14.3177	2.08714	2.68851	4.86381	1.12384	4.4295	0.63259	2.08851	13.5077	3.73139	3.04528	1.68062	0.241166	6.76913	1.09777	2.45009	5.16947
CCDC88C|440193	93.4364	109.271	204.726	120.803	74.8393	53.1332	74.3276	224.006	108.918	76.8762	72.1791	58.6383	114.892	178.028	79.668	119.671	115.441	103.497	73.6121	57.8328	146.932	49.0553	94.2344	128.987	70.3429	126.395	35.985	177.657	71.8828	69.1404	72.6996	42.7118	127.965	78.6824	55.8015	98.2182	49.8403	323.336	72.4705	47.3207	95.1876	117.773	170.885	78.7237	75.9337	334.151	66.6233	120.136	209.983
CCDC8|83987	156.146	27.9448	75.1163	23.2143	30.6673	91.3921	26.0027	26.6304	11.7191	23.929	13.9514	15.1763	6.32194	4.26469	15.7773	8.21673	21.0441	11.446	5.43195	5.72542	18.1727	21.9487	5.96133	10.3957	11.6085	5.30156	33.6223	11.0872	14.113	13.2995	12.2863	33.9703	4.47122	11.3052	4.66307	83.7371	18.0147	6.61841	61.0441	4.44814	6.21942	30.7569	23.86	55.875	7.15588	8.76769	32.5378	2.92206	30.9242
CCDC99|54908	19.0721	21.3824	33.6597	12.1101	13.51	16.447	17.0309	32.3824	62.9525	31.0192	35.6526	92.4208	39.8707	11.5938	18.8907	42.7865	32.2014	31.9137	48.6731	50.5359	35.5146	12.6334	35.731	34.7581	32.5396	50.2023	10.6339	24.6393	22.6885	25.5838	21.0947	17.9929	52.8707	21.0967	11.5888	13.9691	52.7919	32.648	55.5621	16.1551	52.8899	18.6614	31.1551	29.0972	46.457	41.764	12.2581	58.603	47.9783
CCL11|6356	0.378378	4.81081	6.21081	0.755676	1.24324	16.8497	31.84	0.324324	0.540541	12.2141	2.78595	2.7027	1.08108	0.324324	6.31568	4.4573	18.9719	3.45838	8.38486	1.93081	8.67892	7.13081	9.91243	9.35351	11.3481	16.7362	6.27027	8.44649	3.55351	1.51351	3.51243	3.18919	0.432432	11.3459	0.905946	7.21405	2.05405	3.33081	10.9243	2.91892	1.39892	22.4865	46.9578	6.52432	35.5027	6.11027	1.28216	3.40541	14.0486
CCL13|6357	0.348432	4.16144	1.27758	1.91638	0.348432	0.232288	4.41463	3.9489	1.26597	0.058072	0.929152	6.15912	39.2381	0.491289	0.694541	6.7259	61.2625	0.58072	152.239	0.801394	6.62021	0.116144	10.1312	3.36237	6.44948	7.01045	1.62602	0.58072	1.64228	0.932636	3.13473	2.72242	2.63763	16.1359	0	7.83043	9.22532	0.813008	15.6504	0.58072	2.13589	1.0453	28.2009	1.74216	12.7654	1.56794	12.0058	3.80488	5.43438
CCL14-CCL15|348249	3.00752	19.4463	40.0615	43.4586	11.4491	5.46822	1.81135	63.8551	0.717703	8.13055	2.52905	5.70062	8.92003	6.18592	10.8681	8.02802	9.56938	3.48941	2.87081	0.580998	12.6452	6.3568	5.84074	24.0519	14.0465	1.2987	17.5297	9.3609	6.52768	9.50103	45.4101	35.6767	1.46958	0.991114	0.782638	37.488	0.136705	0.649351	21.8729	4.16951	24.9453	6.54477	38.0656	10.6562	8.20232	19.5113	66.7772	7.03691	8.1907
CCL14|6358	20.9804	80.0353	204.404	211.702	49.6961	24.5471	5.42549	322.367	1.07843	45.4529	17.6373	27.8431	44.4804	40.749	38.3118	35.3824	40.1784	21.8529	14.2157	10.1961	54.8	24.1176	29.8922	116.888	67.0392	6.37255	88.8706	46.9255	26.0784	34.7059	218.222	165.647	8.43137	3.33333	3.33333	165.018	1.66667	2.84314	97.3314	19.4118	127.704	29.6961	186.657	43.6275	46.0686	80.3922	337.278	37.9118	33.7078
CCL17|6361	0.649351	3.6526	4.05844	8.44156	4.05844	0.243506	1.2987	5.76299	0.0811688	1.05519	4.87013	0.974026	60.5828	0.649351	0.162338	17.0455	28.9773	0.568182	20.1299	1.05519	3.78734	2.02922	9.25325	2.84091	5.19968	2.02922	2.75974	1.2987	1.78571	2.51623	2.36201	4.05844	4.78896	4.62662	1.04708	6.65584	4.38312	2.84091	11.4448	4.70779	0.568182	2.43506	25.974	15.7127	22.9708	6.49351	27.2727	3.6526	8.36039
CCL20|6364	0	0.705882	0.665882	0.117647	0.117647	1.05882	1.82353	0.470588	6.17647	2.23529	2.17647	5.70588	52.7059	0.235294	0.705882	115.647	5.74941	1.82353	3.76471	4.52941	1.58824	11.0588	2.58824	2	1.47059	3.11765	0.529412	2.58824	2.23529	3.17647	0.705882	3.35294	0.470588	1.76471	21.4706	0.882353	24.7647	0.529412	21.9412	4.47059	0.823529	1.79412	8.70588	3.05882	4.05882	1.41176	2.11765	2	4.58824
CCL21|6366	5.3861	143.513	174.265	17.5125	28.4818	27.6686	5.40433	151.409	6.71982	21.0945	34.9601	6.7426	333.243	42.262	15.3804	520.822	86.9351	76.4305	39.6583	17.197	17.4134	18.5421	107.852	21.8428	179.138	19.6276	88.3724	2.14351	0.341686	11.0296	85.4772	85.0672	8.42825	5.34966	0	88.7301	2.41913	60.7118	451.656	4.58542	3.18337	9.33144	87.4647	258.469	61.574	40.1276	70.5695	3.23576	10.6481
CCL23|6368	0.401929	2.49196	1.28617	0.803859	1.60772	0.160772	0.482315	3.05466	0.643087	0.643087	0.723473	0.482315	8.64791	0.0803859	0.803859	0.401929	1.52733	0.321543	4.26045	0.321543	1.1254	0.160772	2.28617	0.884244	1.75723	0.321543	1.91318	0.482315	0.482315	0.160772	1.36656	1.1254	0.321543	0.562701	0	1.36656	1.1254	0.321543	2.00965	0	1.36656	0.643087	1.20579	5.77974	3.21543	0.974277	2.3955	1.04502	0.643087
CCL24|6369	0.277778	0.138889	1.79444	0.138889	0	0.177778	0.0388889	0.0277778	0	0	0.0416667	0.277778	69.4056	0	0	0	1.20556	0	2.58056	0	0.611111	0.277778	0	0.825	0.755556	0.313889	0.138889	0	0	0	0	0	0	0.277778	0.277778	0.319444	4.64444	0.0416667	1.6	0.0527778	0.555556	0.277778	1.23333	0.694444	0.538889	1.075	0.555556	0.0527778	0
CCL28|56477	134.817	49.343	202.467	13.9033	59.9925	35.1043	39.7173	67.3794	20.8693	18.3065	39.4196	7.89196	12.2324	25.9975	30.3492	177.048	51.3266	15.3003	25.6746	7.22362	19.5126	20.2148	58.2789	1742.72	14.4397	144.555	54.7563	23.7827	33.8656	7.72613	11.9196	57.8229	45.7437	20.3467	45.3832	141.142	3.57538	21.5616	25.9887	11.6005	45.4598	7.40578	140.147	177.955	9.97864	79.9623	135.415	30.5377	47.6658
CCL7|6354	0	0.935829	0	0	0	0.0668449	3.54011	0.334225	0.13369	0	0	0.935829	10.1564	0	0	2.79144	0.935829	0.601604	30.7126	0	3.40909	0.26738	11.1029	0.467914	0.26738	27.4666	0.13369	0.40107	0.13369	0.534759	0.200535	0	0.13369	3.47594	0.26738	0.40107	2.00535	1.33422	3.07487	0	0.334225	0	2.13904	0	1.00267	0.40107	0	0.13369	1.13636
CCNA2|890	12.3138	18.4411	56.5457	14.9527	9.70971	21.72	21.8965	65.281	185.71	37.4443	39.4884	149.514	125.092	15.2124	11.6912	67.7293	75.6453	66.2327	171.348	207.409	28.9879	12.2035	61.9865	42.4785	78.1725	116.762	2.36144	23.0473	10.4874	62.7851	45.3202	2.6503	66.2793	45.4877	31.7172	6.99751	107.543	55.1085	151.079	4.84632	69.4639	25.8801	21.6965	21.9772	73.6403	48.9143	9.8915	43.6969	31.5087
CCNB1|891	34.7419	69.7874	175.139	59.7141	50.8922	60.0709	154.624	233.859	335.689	166.703	256.427	352.948	274.45	71.2525	44.5729	147.383	189.966	153.425	312.446	258.523	151.06	103.559	217.278	284.877	71.4145	293.947	20.4681	129.769	83.5526	149.794	154.931	41.0896	316.019	100.506	89.207	21.6994	234.364	125.881	424.42	35.0962	253.616	76.7763	72.6468	86.292	174.184	231.138	35.0501	168.153	164.624
CCNB2|9133	24.0813	35.6554	87.851	20.6471	25.2649	35.994	56.3138	123.312	433.017	83.398	109.93	289.901	247.079	32.3145	24.2656	91.9857	128.026	135.74	309.263	105.634	101.735	56.8623	139.576	139.932	58.7178	244.512	8.6155	64.1956	27.0369	34.9007	91.9375	16.5064	183.688	76.9503	60.4552	18.6396	647.892	175.176	702.257	10.6471	183.527	40.1264	22.1467	36.0609	131.622	183.019	21.2942	59.4665	52.553
CCND1|595	437.869	981.255	1003.95	135.253	476.769	365.673	65.4075	1703.03	21.9315	3378.4	949.83	11.7632	1721.81	3166.55	305.549	17.5627	243.259	600.52	50.3348	97.7844	3748.78	234.903	689.773	803.896	271.639	312.163	258.366	810.784	379.458	1396.27	2346.49	199.133	196.296	97.7007	296.254	335.383	128.234	244.877	183.486	149.11	1589.99	651.898	293.086	1495.62	713.426	10225.1	168.928	876.335	1075.47
CCND2|894	2.18971	37.7928	40.5564	18.9666	18.1772	126.64	29.4765	33.9974	6.162	35.9897	24.0092	6.12127	23.0836	6.86801	27.6785	29.7373	88.8089	13.4375	29.1012	13.0785	18.6965	34.5766	49.8849	39.35	53.6246	32.2727	35.4348	18.7314	27.1954	19.3548	18.4142	34.9089	12.957	19.5503	4.34727	57.3278	9.02909	9.18527	16.6204	14.2958	21.5252	36.7118	84.3748	41.4739	70.4445	13.0054	40.6085	16.5281	24.2306
CCNE1|898	5.34415	4.92445	6.7991	6.29547	2.09849	5.40011	17.8002	16.3682	106.795	20.3128	13.5115	65.2541	80.1673	3.05092	2.65809	44.7196	54.6447	5.67991	142.022	84.5238	7.4986	53.0453	23.221	26.1332	15.6128	227.843	1.81869	4.53721	3.97314	10.5484	17.0951	1.93061	89.4147	22.4342	18.6318	3.23559	83.2401	9.3089	74.4091	2.09849	6.63123	6.37941	5.70789	3.75546	13.4303	11.3598	2.46223	5.09233	12.9905
CCNE2|9134	7.23518	14.3447	17.5734	9.80603	12.1523	12.5126	44.5141	25.9141	835.439	33.1799	74.2985	209.011	48.6628	10.9236	20.1407	17.4945	22.5714	41.0578	113.628	33.8296	26.2296	7.85477	47.9497	70.8744	38.9322	39.2935	3.66533	27.5834	10.2241	52.4719	35.6487	10.0503	76.4131	40.8352	6.80854	5.04221	19.5864	106.712	71.199	9.84925	107.927	22.5216	15.0136	20.192	138.869	39.5136	7.51005	28.7508	48.0206
CCNF|899	10.6623	16.7796	37.6094	20.3791	27.6101	16.0557	29.0678	30.3656	90.3418	37.7026	50.1632	74.0012	68.2289	10.7678	23.5326	26.53	28.2905	38.5118	93.5513	63.3769	39.7466	18.2163	35.5822	45.475	23.5392	75.8777	21.5966	32.1084	25.6849	32.4136	60.0482	10.4143	56.5919	37.1214	21.0439	17.0302	74.6233	55.9119	74.948	12.1516	62.2943	43.0779	22.7459	19.4695	48.8448	32.3557	7.86868	49.5106	55.6363
CCNO|10309	3.5309	4.35057	60.9893	71.9269	19.623	31.2787	62.7232	1.86003	2.52585	1.1034	77.8159	0	7.98739	0	24.7699	6.14754	5.51702	0.262926	2.45649	4.07314	5.3884	18.8991	55.7989	11.2755	0.612863	1.67276	10.8726	34.0511	83.4931	0.315259	17.7081	68.8733	151.363	10.4458	22.5032	2.58197	0.624212	0.199874	0.788146	54.1129	0.598991	0.504414	95.6393	10.529	0.386507	0.848676	11.396	79.3102	70.0832
CCR4|1233	0.30175	2.80628	7.37055	5.18709	3.80809	7.31382	10.7658	2.8968	1.64273	1.14665	10.9765	1.73748	6.54858	0.754375	4.62945	5.08027	19.0634	1.86723	13.5486	0.1207	4.21243	0.54315	5.14544	4.52625	51.4744	11.7683	1.11587	0.379602	1.53289	0.711527	3.00302	3.38443	2.28063	4.33193	0	12.0435	0.331925	0.679541	5.28908	5.12734	0.30175	2.17139	23.475	9.61859	19.936	6.26554	5.15872	6.13036	3.12975
CCR7|1236	1.00366	7.82998	10.622	20.2761	12.3807	2.20704	7.4872	10.5585	1.40037	3.73355	12.7171	4.31901	23.7952	2.54662	2.89168	43.1435	95.8382	1.10786	28.8885	0.617002	7.52331	8.24177	53.4127	20.5759	157.577	35.6942	4.12203	4.19424	2.78793	2.71115	2156.07	10.9872	10.6453	4.29433	0.317642	19.7445	5.90448	2.14808	39.792	12.2084	2.56718	3.266	53.9351	13.2957	90.3574	7.3798	14.8103	10.0489	7.39671
CCR8|1237	0	2.5	0	2	0.285714	1.03571	3.04143	0.428571	0.392857	0.714286	7.82143	1.74	4.27071	0.214286	0.642857	2.21429	6.17857	0.0714286	8	0.214286	0.714286	0.428571	5.17786	5.32143	9.32143	7.03571	0.428571	0.285714	1.42857	0.285714	0.714286	0.571429	2.17857	2.5	0	2.03571	0.392857	0.75	3.52571	1.17857	0.892857	0.705	5.27357	2.14286	8.25	0.321429	1.42857	2	1.28571
CCRL1|51554	0.862516	8.59922	3.88889	1.016	3.67488	14.3753	29.8876	1.68612	0.99438	7.15521	5.27454	1.5054	4.69088	1.46779	7.86857	3.15607	6.20406	4.2754	1.31863	5.7674	15.9749	2.89667	2.26978	7.58539	3.58841	17.099	4.02075	3.08906	10.7436	2.14008	4.10722	5.984	2.246	5.29615	0.886295	17.9831	1.75097	6.2473	4.34068	2.20493	1.05923	5.14483	12.0385	13.316	3.96887	6.13143	4.25854	1.64289	9.87895
CCT3|7203	450.431	793.088	1793.07	850.156	533.308	666.526	774.778	951.765	2152.26	1527.27	777.316	2459.38	1660.95	611.063	594.741	689.672	1748.08	866.995	2413.6	623.448	1123.56	690.15	482.842	1108.68	435.367	2572.36	611.764	1463.63	754.919	1120.98	919.36	793.21	1663.01	1593.55	1270.39	906.872	1092.48	1208.75	900.563	2027.28	1240.26	1471.17	952.94	1156.83	672.027	975.234	408.731	1718.86	649.108
CCT5|22948	186.789	258.396	490.944	200.66	212.365	254.599	246.558	574.528	1422.89	391.399	475.043	1128	1612.08	208.195	262.321	546.106	437.807	363.682	807.101	227.583	418.145	463.647	335.328	470.624	186.466	460.859	214.726	325.432	278.187	459.351	419.775	220.621	630.274	832.141	279.555	211.248	1081.26	1226.63	1141.33	262.646	688.533	306.178	451.197	446.707	514.924	427.37	191.03	783.614	544.73
CD164L2|388611	3.57375	1.68941	8.70955	3.48278	7.44379	0.822612	1.8473	5.38402	0.872645	2.19558	0.0649773	9.06953	0.519818	6.35283	2.90058	3.74659	7.78882	0.584795	2.21897	4.4308	1.80767	1.59584	0.0974659	1.92008	0.552307	0	4.94542	5.96231	1.78038	0.324886	9.64652	6.13645	1.1371	0.560754	3.15984	6.705	2.4217	0	8.67641	4.25016	0	4.17024	0.454841	3.80637	2.26901	3.02209	5.23457	0	0.841455
CD177|57126	0.664786	0.785657	0	0.402901	41.4247	1.47059	20.0673	1.89645	4.63135	0.261886	4.82313	0.12087	0.584206	0.100725	0.423046	0.50967	1.10596	0.0116841	1.41217	0.405721	0.282031	0.12087	7.03062	9.5701	0.644641	1.36785	0.181305	0.54311	1.83118	0.282031	3.36986	0.423046	0.785657	2.75987	0.245367	12.2462	0.948026	0.724013	0.995568	0.966962	0.123691	4.02619	7.39122	22.8127	0.433924	0.322321	0.946817	0.805802	2.09508
CD1A|909	0	0.947418	0.426338	0.757461	6.26907	0.377546	1.60351	0.473709	0	0.236855	0.142113	0.284225	23.945	0.0947418	0.142113	0.710564	91.586	0.0473709	5.74799	0.142113	9.65846	0.0473709	0.945523	0.663193	1.01847	1.31596	0.0947418	0.378967	183.155	0.663193	0.0473709	0.558503	0.142113	0.284225	0.131691	2.46329	31.9905	0.426338	26.3392	0.236855	0.13406	10.9015	62.6926	5.81052	3.44387	0.71009	0.426338	23.711	0.426338
CD1C|911	0.402504	2.09526	7.95841	7.86896	3.8636	1.18515	3.57782	4.9195	0.0894454	1.61002	3.53309	0.670841	9.84392	1.34168	1.31932	4.2178	22.4052	0.111807	6.74508	0.223614	5.11225	0.223614	2.36225	3.98703	3.76029	1.22987	1.18515	1.97451	9.99553	1.20751	3.95707	10.4781	0.872093	0.223614	0.0894454	7.89177	3.55546	0.290698	6.41771	2.43336	1.25224	7.07379	20.4092	9.25358	13.2661	4.93962	9.18649	4.58408	3.01655
CD200|4345	31.1628	63.6251	27.1703	13.2543	14.6176	45.0892	29.1938	22.9939	43.4913	39.6762	19.1671	13.5401	16.9418	17.3111	16.7527	50.8447	44.39	15.1807	21.138	16.3233	40.1427	20.1783	37.9634	52.6598	45.2088	38.0831	20.0366	17.527	14.031	15.9995	33.5992	66.7762	18.252	25.8564	7.36509	41.5978	5.32614	22.4284	19.1647	10.4388	13.5828	34.5195	77.5458	46.992	40.1943	22.0296	67.7053	23.4632	28.0619
CD209|30835	2.86873	4.83633	5.4754	2.57616	2.3517	5.30866	3.24551	5.08018	4.48959	4.18401	2.54352	5.75	6.05251	5.56079	2.38387	4.80274	14.7067	2.27294	17.6348	3.70932	7.43898	2.12465	6.55274	12.0643	7.42952	4.82356	3.05061	6.26041	4.75639	2.62275	6.4728	3.0518	2.80724	5.15539	4.99645	8.47209	2.85643	4.42715	7.40397	2.9728	8.6658	4.12819	14.9108	4.48675	5.50568	5.11424	10.5412	5.9799	4.56149
CD248|57124	13.9612	62.3544	125.183	52.8059	38.2162	241.199	117.67	64.4775	23.96	143.449	66.2178	39.5707	47.5842	36.6747	51.3307	90.712	118.077	28.0858	52.1464	68.4391	171.285	215.314	135.887	104.595	75.0163	59.1254	158.299	98.486	152.787	53.3851	114.802	86.6176	37.6359	50.3513	29.6052	253.943	26.9336	102.712	124.349	23.0908	80.6584	98.217	210.313	112.722	123.133	37.9224	63.4274	40.4398	70.566
CD24|100133941	1820.53	5328.77	1936.16	2083.12	7724.65	5582.03	1607.6	7685.12	2867.49	5607.31	489.294	7022.17	6167.31	285.912	4998.86	2642.61	3571.59	910.433	4824.66	739.569	5740.2	32154.7	1042.6	4838.1	1132.45	10083.7	2197.52	300.52	1780.45	3230.26	600.6	907.711	3039.98	2177.78	2585.61	2205.94	205.988	12421.5	2703.92	1926.69	2280.32	156.57	3750.5	1787.5	8464.21	3226.27	1621.41	484.673	5510.74
CD276|80381	150.793	194.119	418.016	103.58	164.682	471.722	201.183	229.405	319.566	491.422	248.724	462.429	286.206	75.5575	157.602	163.743	231.569	174.293	441.148	180.943	292.116	310.472	168.421	160.733	131.378	187.733	200.726	146.23	228.672	117.818	200.14	197.341	231.372	199.354	198.729	474.164	238.657	434.262	540.95	86.4141	100.156	255.257	295.052	306.554	196.419	189.414	144.946	173.806	177.975
CD300LF|146722	0.671892	5.14838	3.28163	2.60358	3.08007	5.20717	5.15957	3.22844	2.4888	5.78219	10.1008	3.61142	23.2867	3.29787	3.63662	7.05655	24.0773	1.62374	9.89922	2.46361	5.68813	3.76036	20.1489	9.01176	13.5991	10.4703	2.40761	8.6523	2.82755	6.8813	3.27828	5.96305	7.27604	7.72676	1.56775	5.40034	3.16349	2.69485	8.31187	4.92721	1.95969	5.49328	14.6193	7.09742	20.6948	3.28163	2.74356	6.53359	2.37962
CD300LG|146894	16.2956	9.59271	24.617	11.4354	4.42553	4.05471	3.85638	54.696	4.93237	4.16717	2.42781	4.75076	7.30395	4.68693	2.06611	5.24696	8.91185	4.00988	5.47948	3.59574	19.8875	2.50684	4.87918	49.019	14.8161	3.40426	17.3716	9.62766	1.49848	2.75076	11.7454	5.71353	2.74468	1.8617	4.05243	51.4172	2.231	3.65729	4.80167	2.61398	52.9149	5.59878	28.3473	14.6672	5.82295	7.18465	42.209	8.45745	5.86094
CD302|9936	26.7979	28.3711	40.8574	15.2421	20.7823	47.6694	19.7653	40.6335	13.5753	26.6281	12.7687	5.74506	21.0726	9.85791	25.4001	14.2729	30.7828	14.4057	78.4868	33.6217	21.2103	21.3193	37.1246	42.5978	19.079	5.89997	17.9618	58.634	26.2957	16.2734	27.1862	33.2942	20.6148	11.9133	2.4237	31.2319	12.3108	3.38548	8.54065	13.0803	29.6933	55.851	54.5489	31.9159	8.08592	57.9805	47.8289	50.9713	18.7189
CD34|947	22.7907	176.624	168.657	65.4558	67.8833	100.269	75.6849	182.984	49.4554	147.969	74.3209	66.7434	81.2209	98.1287	65.4012	123.479	126.816	70.1341	76.1574	75.3992	157.133	80.1829	145.549	176.688	138.89	69.3671	120.048	91.4612	77.3434	92.0202	335.507	167.102	61.8605	111	57.5155	203.674	16.1802	120.648	102.261	42.5543	146.233	118.975	270.257	180.79	137.141	119.088	220.49	111.76	104.438
CD36|948	65.0532	145.997	123.027	68.4224	37.9865	8.27211	37.2441	317.184	8.62832	7.72257	7.90043	64.2112	71.3098	72.0135	18.6356	85.8763	22.8594	50.4282	52.8279	7.30353	324.706	7.88787	27.2359	489.607	216.297	44.4026	88.7728	52.3615	85.7139	12.7008	287.787	15.2344	23.2678	20.3436	8.33156	485.453	1.73755	46.2658	29.4693	18.2446	361.609	56.4079	834.471	150.164	45.6728	66.6709	391.396	147.274	44.5892
CD80|941	0.708833	12.4318	2.29008	1.72737	3.43511	6.12323	10.6838	2.17012	3.92585	12.8844	7.19302	2.94438	15.0916	1.9084	2.1265	14.8637	26.4667	2.5627	19.9237	1.9084	3.56816	5.34351	17.7405	29.5322	34.831	28.3119	0.763359	4.95202	3.19738	4.90731	3.16249	7.52454	13.4133	10.3195	0.490731	5.12541	6.10687	2.28571	14.5529	3.27154	0.654308	2.07197	24.9651	4.45038	17.9847	6.01963	3.21701	11.3108	6.51145
CD9|928	646.082	2083.58	2545.94	1808.28	1652.89	2164.02	850.821	3493.78	3907.26	2809.78	1814.52	908.015	10548.5	941.916	1743.88	1203.91	1471.48	2309.39	4746.21	1390.76	4397.21	2311.42	5302.63	2811	783.193	1100.92	1119.74	2472.73	2439.9	3627.12	4706.4	1624.44	1132.97	1040	619.938	1167.7	989.15	7679.65	1989.56	983.07	1234.14	1632.45	1973.06	2494.17	1968.3	3159.77	1148.61	4179.17	5159.42
CDC14B|8555	20.2152	10.4492	13.6761	4.20434	4.71302	15.9828	6.96908	14.6306	18.6506	11.1944	11.43	40.8501	10.9868	2.04919	7.36293	14.4731	11.9387	3.05624	26.7866	15.217	7.1358	6.49837	7.90615	6.38264	7.79114	3.8642	5.24322	8.03816	12.2116	3.40289	13.208	23.2613	5.04521	4.39024	3.4434	14.7148	10.0689	1.57577	33.6586	13.641	2.79078	19.7315	16.6011	20.2882	4.72875	10.4127	22.3503	18.1479	4.92767
CDC20B|166979	1.05438	1.45092	12.2232	23.9799	4.91102	5.62288	5.89619	1.42549	2.13948	1.25706	76.7122	0.908545	1.16773	0.622881	9.5166	1.39407	1.58475	1.07133	2.48658	1.14936	3.03955	1.94774	1.59852	3.26306	0.872881	1.13171	2.88559	19.3411	24.3432	0.927613	1.92408	57.4477	2.39513	0.998234	1.57203	1.16278	1.38736	1.18468	1.79308	13.0205	0.916314	0.924082	94.345	2.51589	1.46893	1.36123	0.891243	70.691	8.64371
CDC20|991	24.0762	21.94	120.583	52.8868	34.0133	33.1062	97.9394	133.38	434.292	140.455	71.6796	387.97	528.158	36.2587	31.2644	285.316	184.29	50.8435	331.721	278.427	90.7483	173.639	117.594	137.114	55.541	423.584	13.0485	81.2789	23.903	63.0064	73.6363	11.5855	198.525	57.9965	74.1224	26.5462	591.585	133.11	637.311	8.94919	126.039	40.8458	31.5133	42.6097	162.154	105.139	15.0115	32.1467	59.1801
CDC25A|993	5.96117	3.07629	7.20919	2.85753	3.44545	1.53131	8.98277	10.8955	84.5182	8.59995	13.6587	119.857	43.3311	5.18184	3.24036	20.7225	22.6079	14.7484	56.1613	46.2811	10.5849	12.8917	16.9401	21.7957	5.48346	28.4178	0.929724	7.1843	2.63877	7.31474	11.3071	1.28521	15.6546	7.2327	4.84003	1.79109	33.429	12.3476	38.2021	0.533224	11.8917	8.14821	6.1411	3.0659	20.5882	22.6661	2.93957	13.0096	8.74077
CDC25B|994	49.5214	86.3904	73.2493	21.1903	20.8501	42.4287	83.7816	118.002	531.208	93.4098	119.445	163.586	165.715	42.4754	25.4389	90.6871	171.391	91.7068	163.403	64.5892	69.1791	110.492	249.055	161.523	173.935	537.408	28.1039	82.6397	41.9933	68.7195	137.429	53.1074	332.864	87.9456	99.6784	43.9059	273.292	82.2518	347.128	20.19	96.2079	27.4108	101.088	77.9712	209.4	78.8919	24.5962	206.895	145.208
CDC25C|995	3.83982	9.93014	19.2839	7.46008	4.14172	3.71756	6.66467	29.0344	35.0524	14.1193	34.3064	26.3723	25.9022	6.88623	5.06487	24.3762	13.8713	24.5644	29.8743	10.1048	21.9286	6.40968	24.0739	22.5549	9.03743	17.3154	1.57186	15.1557	5.73852	15.6687	16.6168	0.598802	46.8563	7.73204	8.45808	1.72156	39.9925	21.0579	48.6407	1.37226	53.8139	7.13573	7.13573	8.47206	20.1163	35.3428	3.34331	13.1267	15.3194
CDC45|8318	10.0183	4.44561	28.1679	9.78033	5.85513	5.93619	28.3447	17.6517	238.8	32.011	20.7427	156.979	111.055	16.5377	5.83159	50.2395	30.8499	22.5889	93.6098	84.103	14.5272	36.5063	55.1098	38.6977	28.8938	38.7746	2.09205	14.3044	6.86506	29.5973	15.2171	1.07218	28.3473	36.9671	21.1009	2.72333	52.9461	45.2118	177.724	1.85669	53.6532	13.4738	5.64331	7.09153	60.0052	49.8405	5.05073	17.6789	19.0377
CDC6|990	12.1621	11.4193	34.5215	14.6826	11.2548	13.9633	21.2014	51.209	180.668	756.214	789.275	206.463	61.5771	18.7599	13.6731	29.2997	33.4157	42.7013	67.1189	41.0727	33.2139	223.927	39.2388	62.5038	29.4451	43.9938	4.11595	26.9378	12.2237	63.0616	61.433	3.24926	63.0894	49.9761	18.1333	6.28922	59.2738	259.861	76.5296	6.87291	77.131	29.9191	10.7386	12.3177	88.1376	60.8477	8.22306	24.2211	46.5811
CDC7|8317	7.40119	9.41531	20.7654	3.45044	4.05897	12.9391	28.458	17.798	122.563	35.4454	8.87955	113.346	69.877	6.61324	6.91656	44.1468	33.5712	11.526	47.4043	41.4821	12.8137	9.49749	31.0445	20.6832	19.4203	26.4141	3.77949	54.9216	6.80521	27.6772	14.7616	19.1575	13.4724	8.1054	4.31148	6.93538	34.3162	23.127	48.7425	4.40715	23.4755	7.53356	9.52008	7.1675	15.2117	20.8723	5.8187	22.7839	20.4727
CDCA2|157313	3.6928	5.30907	19.1873	2.03372	1.67246	4.65614	9.79502	15.8796	17.7	14.2071	16.16	69.9628	46.8031	5.99411	1.65908	8.99117	15.3439	15.4389	40.9318	23.2531	4.34841	8.34761	10.5566	10.0377	6.86567	196.654	0.722505	9.43002	4.97592	22.5421	7.79315	4.02729	19.2079	11.532	5.14985	1.27107	54.1295	8.47953	45.6489	3.88012	16.6845	6.11961	6.68852	6.76398	14.1282	12.1349	1.7126	7.7027	3.06396
CDCA3|83461	5.82573	14.2067	27.5486	14.9919	11.0122	10.9904	15.2943	37.9823	197.827	26.8029	20.04	109.48	178.016	13.231	10.1003	135.678	88.7356	46.3273	201.016	123.89	38.4959	12.2974	68.8445	61.0324	29.3784	74.7801	4.99088	31.9904	12.267	20.037	42.3333	1.86626	64.8749	32.9301	25.9625	7.21378	111.256	44.6601	146.209	2.44073	54.4909	12.6028	12.2325	12.4529	53.4757	29.7194	5.03394	26.7229	28.7893
CDCA4|55038	39.0699	28.49	44.2123	27.4635	19.016	29.7315	37.5265	56.8954	161.7	37.8311	42.9338	101.758	86.9352	14.7699	29.3548	132.286	56.6658	62.5228	113.73	142.646	70.9123	32.7808	70.5352	63.0416	23.6155	95.921	26.1626	49.3228	39.1014	46.7128	39.0726	28.5836	32.2616	25.7018	31.6836	31.489	105.299	50.8826	126.763	21.5639	33.8151	44.1731	37.3671	63.8758	33.6671	47.4384	23.0233	25.9671	79.9525
CDCA5|113130	14.4402	21.3609	27.4482	16.5152	14.1393	21.237	45.1897	41.8496	266.751	46.1308	64.9935	235.594	192.664	27.671	12.5852	47.7791	71.2847	67.3809	208.627	117.488	72.8523	51.3651	81.6745	44.1424	27.0489	100.568	5.91728	24.8869	20.6564	86.384	57.0958	5.76799	107.745	41.1958	48.0635	9.28165	114.428	108.268	424.756	6.26279	151.491	32.1439	18.2755	28.9769	113.114	136.595	5.78145	28.1466	45.424
CDCA8|55143	12.1798	13.5619	58.1156	23.7581	18.8875	18.6386	42.3178	52.9767	190.699	52.853	34.3385	264.929	120.701	24.0832	13.9284	62.8788	77.8875	35.0992	305.904	161.07	44.4273	25.9379	64.7477	60.0927	31.6063	297.696	5.97154	47.7641	12.9125	33.8724	57.3251	8.23631	83.0625	25.3773	42.1488	10.3213	146.927	53.3195	323.333	12.2251	90.7719	23.9517	13.9694	22.0229	92.2609	67.1199	10.508	24.7883	40.2816
CDCP1|64866	31.8971	98.4413	107.69	26.6142	45.9968	121.143	122.17	46.4919	192.207	223.72	45.8969	112.44	112.448	29.3939	37.5054	68.6834	97.496	47.8538	156.448	34.9085	34.4378	83.6839	99.2353	121.982	49.5536	95.3543	30.7426	68.4289	82.4163	28.4071	71.2811	49.6408	45.0186	86.7625	48.2219	29.9599	71.1661	90.8869	71.3667	66.416	64.4995	97.3877	148.574	23.7143	34.7647	90.2706	45.4822	90.5924	23.6317
CDH11|1009	313.316	523.115	390.482	111.893	235.818	1311.22	482.135	187.24	73.396	575.084	250.284	58.0173	118.229	41.9577	295.636	69.221	171.228	123.083	66.9743	78.4223	344.896	380.126	91.9367	135.856	190.083	176.254	233.541	73.0207	233.079	120.196	133.415	204.282	60.3313	325.846	25.9123	443.997	28.8077	83.4133	226.386	105.869	67.8333	381.446	364.749	516.155	123.177	99.7813	149.776	64.0757	168.387
CDH12|1010	5.66873	0.390205	0.916577	0.25915	0.215823	0.339882	2.6916	0.107643	1.60818	0.578579	0.0473628	0.202368	0.499462	0.228741	0.296017	1.62809	0.164962	0.746771	0.221744	0.030409	0.609795	0.121098	0.969322	0.745963	0.070775	0.145587	0.780409	0.678687	2.12648	1.93595	0.189989	1.55194	0.309473	0.273143	0.807858	0.232508	0.161464	0.323466	0.213402	2.69995	0.514801	0.639935	0.274489	0.434069	0.199408	0.163886	4.82777	2.03714	0.34042
CDH13|1012	19.4308	65.7723	22.4009	10.4127	13.3909	44.5681	23.9657	49.625	31.8403	37.5376	15.4168	7.91583	70.3302	18.0979	14.6156	16.5023	11.1505	25.3245	11.9274	12.8675	33.2279	17.6892	22.3269	28.3353	12.7337	9.91637	16.0483	16.4173	16.9299	21.5619	28.0437	30.4335	13.4327	25.154	17.3412	32.1878	3.49339	33.8516	18.7888	8.14675	26.1789	50.4559	51.1745	45.3599	14.7057	17.4791	25.4492	17.7176	23.1589
CDH19|28513	1.59076	0	0.0669792	0.0334896	0.0669792	0.154387	0.0368386	0.117214	0.0535834	0.0669792	0.0167448	0.0334896	15.7066	0	0.0502344	0.301407	0.0502344	0.0334896	12.8577	8.83322	0.154387	0.0167448	0	0	0.0334896	0.0669792	0.502344	0.019424	0.217683	0	0.301407	0.368386	0	0	0.0167448	0.669792	0	0.0167448	90.2867	0	0.133958	0.0338245	0.267917	0.670797	0	0.00100469	0.334896	0.0334896	0.0334896
CDH1|999	796.743	625.105	717.716	551.75	458.017	608.483	427.489	3759.24	205.143	416.813	466.573	351.407	817.769	1100.02	267.355	96.6545	605.15	789.593	1402.84	106.403	387.585	671.569	1117.12	1453.63	507.047	437.037	188.711	489.216	648.861	1207.06	3026.5	368.145	2397.41	771.202	490.919	267.913	134.816	987.013	462.588	460.154	947.383	644.296	33.8486	797.859	617.196	1533.61	568.502	1320.61	1365.39
CDH20|28316	0.219446	0.253207	0.236327	0.151924	0.320729	0.0844024	0.202566	0.810263	0.0675219	0.118163	0.0675219	0.0367995	0.632343	0.0675219	0.033761	0.270088	2.06178	0	0.374409	0	0.204591	0.118163	0.101283	0.0844024	0.168805	0.101283	0.151924	0.0567184	2.81904	0.0506415	0.186698	0.0168805	0	0.0168805	0.0675219	0.490209	0.573937	0.033761	0.422012	0.118163	0.236327	0.311276	2.75017	0.289332	0.138082	0.0506415	0.253207	0.844024	0.202566
CDH22|64405	0	2.19401	0.888435	0.571429	0.421769	0.984218	0.000816327	1.52381	24.3214	0.29932	0.166803	0.127619	11.7698	0.108844	0.111565	0.0873469	0.165442	0.0446259	0.325714	0.108844	0.00353741	0	0.201088	0.0544218	0.408163	0.0269388	0.163265	0.0329252	0	0.598639	0.122449	0.77551	0.000816327	0.258503	0.0293878	0.441361	0.693878	0	0.262041	0.110204	0.14966	0.765986	0.462585	1.32327	0.105034	0.0693878	0.653061	0.00353741	0.318639
CDH23|64072	1.70848	10.8482	10.7848	10.4411	7.59687	19.0326	11.9643	10.475	48.1397	13.9272	6.98036	2.42098	10.3353	2.83393	11.1366	7.02321	8.18527	2.16205	6.11518	5.94107	4.10313	15.0754	4.11562	7.17232	24.9196	4.28929	13.517	4.54286	14.6004	12.5348	19.9531	11.7312	4.55089	2.41339	3.16786	26.3393	2.34196	10.5781	4.69509	1.80804	3.28214	11.7393	26.8366	18.8714	15.9371	9.19866	19.5571	4.82188	10.7174
CDH2|1000	2.3352	14.0842	4.75164	1.62977	3.57334	32.2484	5.99246	11.9516	145.928	189.326	42.4286	5.20847	167.881	261.29	4.97105	13.3221	4.45196	7.42228	37.4994	14.6193	3.62199	6.84554	72.5935	2.66359	3.60229	5.89759	5.31477	2.07979	3.86767	1.946	1.95281	2.59061	2.2379	8.68402	4.95013	13.1226	11.829	5.55704	3.51666	2.34736	1.20409	8.61469	7.55996	25.8329	15.3153	4.46534	1.83654	8.93821	6.61494
CDH4|1002	3.7509	0.114267	0.409076	0.21221	0.0845576	1.81195	1.01208	3.44434	83.2527	0.29383	0.244858	0.0326477	10.8965	0.261182	0.359125	0.391773	0.541626	0.0652955	34.1557	2.23637	0.13712	0.29383	0.0652955	0.429971	0.473392	0.538688	0.50604	0.0979432	0.0652955	0	0.484166	0.441397	3.60398	0.347372	0.326477	1.13026	4.52171	0.359125	0.353575	0.0652955	0.0816193	0.314398	0.29383	0.525628	0.130591	0.0378714	1.01045	0.0182827	0.134509
CDH5|1003	40.5611	102.039	113.702	52.6663	43.0691	65.6112	44.3504	120.834	27.7442	97.0915	51.1196	52.2782	50.8891	59.1319	53.5852	71.3657	71.336	45.5508	49.8544	34.5234	100.565	53.0438	94.9916	132.759	88.6423	54.4846	78.6864	70.7575	37.7802	48.6159	103.03	78.3013	36.5033	49.7508	30.8931	128.053	9.98163	67.3156	74.3103	29.5063	93.0518	63.0227	231.368	119.662	85.8868	71.3921	90.3607	64.2265	62.5484
CDH8|1006	9.95199	1.0298	1.09396	0.289735	0.827815	0.974752	0.904801	0.434603	6.44743	0.673013	0.248344	0.0827815	0.331126	0.84851	0.724338	0.103477	0.730132	0.289735	6.12086	0.289735	0.334851	0.186258	0.735513	0.926738	2.40149	0.231374	0.331126	0.124172	0.206954	0.413907	0.413907	1.11755	0.331126	1.65563	1.48013	1.59685	0	1.97765	0.393212	0.745033	0.745033	2.74089	0.57947	0.584851	0.880795	0.479719	3.71399	1.78767	0.331126
CDK1|983	21.9522	73.7895	131.233	106.321	37.3986	40.1549	153.372	179.938	571.587	137.182	106.249	202.359	152.076	47.0722	38.435	159.156	180.411	179.637	199.1	587.364	134.765	66.2542	258.015	333.679	1019.68	280.834	11.1227	132.732	46.5437	122.665	83.2791	32.5546	253.665	136.32	61.5998	15.8758	188.422	102.674	426.402	25.2859	140.52	90.0722	62.9797	60.6086	299.886	239.121	33.9397	140.784	137.44
CDK2AP2|10263	57.2276	101.029	163.487	70.6628	75.2441	102.216	146.104	123.384	198.206	192.432	178.258	122.962	142.264	235.309	89.4059	240.112	211.882	96.1081	148.245	232.596	202.641	228.236	212.908	297.047	92.2262	118.725	123.958	361.162	261.044	94.7244	127.021	98.4953	143.859	78.1625	267.635	104.615	123.228	184.634	191.822	89.0802	165.548	145.796	167.925	150.568	154.821	202.991	66.5655	124.331	105.288
CDK5R1|8851	45.0905	16.486	25.0718	47.7784	12.2164	26.5245	20.8772	40.9896	532.675	29.2893	25.4017	193.381	68.154	31.2456	19.5442	13.3611	69.4703	23.2674	16.6285	29.5442	33.0094	9.64932	18.9178	26.0042	20.6722	21.1041	13.4152	18.8366	12.9917	26.0895	64.001	7.68783	42.1623	29.7503	13.0812	39.5609	24.9948	29.8783	51.7752	27.9667	26.3351	30.641	20.8803	17.7586	52.7596	25.026	17.5546	64.5494	39.8085
CDK5|1020	26.7531	56.2765	136.842	63.884	84.3311	91.7418	67.4903	110.472	73.2423	90.1047	55.3117	230.936	136.646	103.166	69.3231	147.509	138.889	118.263	188.939	111.297	123.282	87.0307	123.243	131.129	63.8271	91.6542	77.2617	208.298	138.794	76.5666	155.726	99.2014	202.431	58.7201	81.1149	141.124	99.4687	215.16	202.697	67.4141	107.339	158.634	73.8567	121.24	90.5256	136.013	39.76	109.262	114.267
CDKL2|8999	0.582998	8.87216	0.871741	0.657197	0.0652957	0.551198	0.0635997	3.95378	0.360399	0.876404	0.0566038	8.31037	0.0211999	1.25079	0.201399	0.225355	0.233199	0.413398	0.213695	0	0.0635997	0.0423998	0.360399	1.45219	0.201399	0.182955	0.445198	0.106	0	2.46767	3.05957	1.1872	0.763197	0.0211999	2.3534	0.900996	0.0216239	0.148399	0.151367	0.0423998	1.38859	0.233623	0.296799	0.937248	0.382234	1.87619	1.86559	0.00466398	1.1554
CDKN1C|1028	29.8142	38.0631	46.0591	23.2624	36.4178	59.031	16.2303	100.084	531.769	22.7477	26.1492	37.5681	159.804	24.4437	26.2804	15.009	58.464	7.35586	16.924	47.6627	79.2342	28.4195	15.5197	34.9403	17.6937	25.2748	30.0113	10.6577	30.1492	32.2646	20.8491	45.0422	40.67	28.3221	19.5631	61.942	6.75619	28.9482	8.32489	9.51577	17.7928	11.1064	33.4825	34.7207	32.2072	6.49099	50.4285	2.82658	28.5794
CDKN2A|1029	8.01349	22.7262	27.4206	15.8032	13.1317	76.4317	117.08	35.7444	251.891	32.073	17.5302	352.421	746.543	18.1151	18.4246	340.288	84.5929	3.88016	155.542	1155.32	12.6619	135.664	9.8127	40.5214	15.8619	338.309	38.5056	13.4278	17.3032	28.5087	14.2563	32.0302	13.4159	14.746	5.03968	22.8492	202.404	5.11905	208.702	4.52063	33.3222	18.5048	66.246	18.3413	20.4722	14.4286	10	39.6516	26.5278
CDKN2BAS|100048912	0.410734	4.1621	2.09858	0.930997	1.34447	3.03943	6.42114	2.87514	16.1577	4.14294	1.68127	5.42826	9.95619	2.15663	1.83461	6.21358	3.85761	1.37568	4.22892	10.5148	3.51588	1.20482	3.33844	8.49069	2.05367	6.69441	1.20482	3.86911	0.777656	2.18072	2.31271	2.20865	1.97152	1.12267	0.821468	1.42442	1.28697	1.61555	3.31216	0.985761	11.2163	1.40526	3.97043	1.11939	2.1057	6.47207	1.07338	8.92662	3.06681
CDKN2D|1032	4.51125	21.4507	50.0892	14.2358	22.3041	18.5027	26.0372	60.9775	234.78	40.2863	19.3949	41.7137	58.0132	23.969	25.3297	33.7176	44.5787	82.6998	40.4523	132.409	50.8697	37.083	69.5066	73.2273	39.4453	34.5966	23.7758	67.8766	23.2227	52.9612	82.5562	23.5842	17.4554	20.9853	92.3033	24.4763	111.362	121.656	192.866	9.50349	75.7952	37.1218	38.3631	39.9728	122.063	102.126	11.6757	53.2064	73.0023
CDKN3|1033	14.6885	41.6134	69.3211	28.1949	24.5927	34.2843	75.099	127.764	303.936	125.296	88.2812	265.998	118.203	29.5447	26.1981	102.995	123.61	109.688	136.094	68.131	92.2524	51.5096	151.978	124.891	47.4361	106.31	9.66454	87.0847	38.3946	129.609	48.6422	11.1821	76.5176	67.3323	39.9361	26.9169	200.711	87.2204	225.204	8.94569	133.546	44.8802	52.7875	55.8307	134.895	134.896	17.4121	49.3131	36.901
CDNF|441549	11.5233	5.33534	13.1782	3.45865	6.66466	5.21955	2.10526	14.4218	3.27068	5	1.2406	11.9135	1.05263	2.29323	5.67669	3.1203	5.1609	4.43233	3.84286	1.91729	4.27218	2.06767	13.9774	7.63158	3.34586	2.66541	5.30075	9.28571	5.86466	6.95489	6.82932	6.46617	3.49624	1.50526	3.38346	4.43233	0.601504	8.69323	3.7594	8.83459	3.7218	3.66692	3.94737	8.04511	3.27068	7.63158	5.75188	2.5188	7.33083
CDO1|1036	17.1174	11.8095	9.44683	12.2631	5.07068	12.9988	7.42778	43.7732	0.245851	2.48924	2.91334	1.47511	36.6214	1.75108	21.9324	3.56484	5.13215	2.55071	68.3215	1.35218	11.0049	4.45605	1.38291	14.0639	14.496	6.38291	12.1119	2.33559	63.0762	3.47757	17.2127	13.6411	1.59803	2.70436	0.301168	25.7228	1.32145	1.29072	4.35095	3.04978	4.32391	3.89736	48.2606	12.4505	1.96497	8.44561	24.142	3.75784	26.8888
CDR1|1038	1.65358	0.923788	1.32025	0.34642	0.628176	4.00231	1.71824	1.77059	0.34642	3.13934	1.40185	0.230947	0.592764	6.0739	0.544265	2.23403	0.153965	0.230947	0.654349	0.500385	0.538876	5.34873	2.75058	0.789838	1.12009	0.885296	1.23326	0.153965	1.96305	0.230947	1.17783	3.02156	0.269438	0.153965	0.230947	1.88607	0.535027	0.230947	3.02386	0.153965	1.46266	1.00077	1.19323	0.654349	1.03926	1.05928	0.0769823	0.962279	116.425
CDS1|1040	50.3783	144.403	172.439	68.7613	102.263	132.131	58.9494	196.918	45.826	200.11	77.5492	72.9302	110.461	102.133	87.2764	64.198	76.5155	153.461	167.193	35.0976	94.7848	116.751	138.638	171.99	35.051	47.7887	46.0078	151.491	74.8946	262.905	305.551	102.4	140.805	72.9357	58.2372	90.394	41.8898	82.9526	56.4982	100.46	144.593	124.12	136.405	170.75	79.7374	307.367	114.616	291.137	156.312
CDSN|1041	0.725775	5.13535	6.69321	9.61671	19.643	22.4221	6.07101	10.4782	0.156924	253.822	1.49078	0.235386	0.509219	1.58297	12.226	0.934876	2.08984	0.235386	3.4488	1.82268	4.24951	1.39153	29.8639	0.31581	59.2515	2.7195	17.3393	11.9329	23.7368	1.00942	4.0612	2.38721	51.7811	6.18752	1.07415	1.96979	1.36446	9.68105	10.683	19.5692	0.846607	3.67634	10.4963	8.24049	22.0604	20.7383	6.59553	8.75677	31.5547
CDT1|81620	14.9117	6.89861	26.3311	17.074	7.52991	8.25419	24.5587	48.5201	219.092	27.5208	36.1021	104.611	110.402	27.1791	7.17177	83.6743	28.0919	22.1036	95.1827	63.8753	20.302	19.6623	78.6422	45.8756	15.26	53.632	5.16594	18.0941	10.9168	21.5295	16.3279	14.0346	42.3093	17.3016	39.9869	6.55872	48.783	21.5088	229.84	8.7892	23.5631	8.60722	14.6791	7.42195	38.2185	24.643	3.45259	39.1331	21.3111
CEACAM5|1048	1.28996	214.703	3.68936	1.28565	3.17837	6.63292	240.807	48.2404	3.56829	3186.64	391.483	7.24515	1.32357	3505.77	3.28738	3.56958	2.70788	20.6058	1.91081	1.93667	6.94442	457.804	3179.58	4.14003	2.14304	25.05	1.77251	124.452	26.685	25.6385	51.6872	24.3563	11.2749	7.13615	38.0599	5.53813	1.52994	11.3856	1.53382	32.112	65.5515	25.2154	4.33692	8.46747	2.0112	15.4722	2.64972	57.6506	36.944
CEACAM6|4680	11.9757	2117.73	10.244	4.84341	8.93691	10.9217	763.754	39.938	0.475105	14292.9	1648.69	500.536	0.418092	20555.4	10.3736	39.1798	7.61422	244.262	0.138731	0.148993	6.14291	3278.61	13534.8	7.33333	2.93957	23.6237	1.28202	168.666	39.081	32.6138	90.4162	594.883	70.1319	14.3713	248.295	4.15887	0.0760167	1.19384	0.888635	414.008	608.399	72.4265	17.0912	6.70772	4.3759	357.051	36.1665	570.662	231.615
CEACAM7|1087	0.29985	2.69865	0	1.66867	0.674663	0.5997	1.68666	0.149925	0.29985	9.17541	3.56072	8.77886	0.0749625	17.4153	0.494003	3.81559	0.187406	0.374813	0	0	0.908546	3.55847	28.1417	3.23913	1.42429	0.224888	0.449775	10.4513	1.27436	2.21589	0.385307	5.77211	2.92354	22.2624	12.3531	1.1994	0	6.10495	0.224888	0.824588	19.7031	0.412294	0.308846	1.34933	6.44228	0.848576	1.31184	25.0757	3.03598
CEBPA|1050	70.3732	33.4948	29.6827	24.1883	38.9915	50.9695	56.7372	58.5735	109.495	154.456	52.5488	24.5839	74.6032	13.812	35.9004	20.6106	101.841	19.5951	81.017	101.404	30.7017	35.6766	102.066	111.013	38.6936	33.9074	32.7924	64.4925	41.5098	51.0575	56.4678	26.6912	24.9734	59.6098	11.8008	63.0301	39.1594	55.7391	10.1964	20.6912	29.1683	33.6928	154.138	48.5589	88.8742	40.6013	14.7017	44.7742	24.8865
CECR7|100130418	11.3467	1.46515	5.06897	2.31071	0.363903	2.95598	0.822817	1.50147	61.2007	3.95048	2.60455	14.3709	9.72597	0.323551	0.528613	8.51064	9.35106	1.19222	17.1489	4.91636	0.330154	9.67828	0.340059	9.38701	2.16911	12.4266	3.781	5.33236	18.562	1.97506	0.845928	5.24798	0.634629	1.23844	6.60382	8.9259	12.0697	0.383346	17.3888	5.7036	0.411959	0.553191	9.12656	2.44571	0.604549	1.89215	2.71753	13.9373	0.368305
CELF2|10659	58.7647	23.3959	30.7781	36.0277	23.6819	57.4243	34.8074	58.7149	89.9266	53.8342	28.3915	521.996	144.779	10.4009	19.9625	17.8001	68.7085	9.11596	51.759	12.6351	23.1205	13.8397	30.7806	44.9197	87.2278	47.0314	21.6191	22.1655	22.545	15.0014	21.0575	25.4004	8.95862	19.2769	2.22146	46.7619	7.51478	62.1896	29.1128	18.7196	8.91201	23.59	111.257	59.0082	71.1062	22.8604	63.1785	23.5491	23.2469
CELF5|60680	6.59332	0.922099	4.92814	6.41367	7.91892	4.78156	1.60604	1.75898	7.27822	6.47949	0.130048	32.2165	0.115421	3.90906	3.4337	0.303975	0.384738	0.0658188	1.44134	0.63593	0.450238	2.3345	0.0896661	0.416216	2.25978	0.192687	0.937043	0.223529	6.8725	0.161844	4.81494	3.6725	2.48013	0.0953895	3.77075	5.32814	4.06614	0.149444	0.277901	3.19173	0.0953895	1.17901	0.953895	2.26804	0.385692	1.31224	0.858506	0.757711	0.190779
CELSR1|9620	39.8153	208.143	329.203	84.8244	178.693	109.269	73.9665	270.476	49.6471	199.899	72.3678	38.0898	77.1561	225.231	128.19	17.5521	29.4677	71.6263	29.524	5.94635	154.019	19.9603	74.9034	217.319	44.8957	46.3754	73.0696	222.782	183.677	77.2375	154.903	55.2611	104.999	76.8356	71.7468	58.7596	9.5236	136.811	22.8803	249.966	189.039	412.693	157.549	217.496	24.063	557.183	162.94	152.111	175.527
CELSR2|1952	21.1704	27.7533	141.742	18.2135	82.5949	43.0902	31.6486	380.392	112.537	254.357	55.1357	89.8398	85.4412	234.905	35.0832	14.1379	24.0028	78.5392	53.7324	78.065	80.3743	26.1921	18.9091	82.186	17.6722	22.2129	53.5751	120.77	35.2719	31.2599	454.274	69.3526	81.6918	10.3591	44.7152	41.0798	29.0405	35.5207	68.4422	105.371	130.882	157.127	20.1683	122.427	15.8074	475.798	113.817	43.8261	105.613
CELSR3|1951	2.6351	1.46271	7.70612	1.54645	1.57157	2.53986	6.30505	3.60764	57.1227	5.2902	22.5145	17.3668	25.0373	4.02334	1.31197	3.9425	4.54768	13.9958	4.0259	0.916146	2.47845	2.53059	9.07381	30.652	2.4234	26.3496	4.30996	6.76798	2.90878	6.84245	2.06755	6.99777	4.11244	8.35094	6.04444	2.40163	1.84792	24.4816	2.36534	9.15531	0.829611	2.82448	2.29031	5.98236	2.98761	3.47633	1.72689	15.802	2.8975
CENPA|1058	4.17899	15.5991	21.0429	5.32544	6.57914	8.61317	22.3225	28.0148	134.495	26.0318	17.3336	265.803	68.6908	7.13757	6.28698	68.6391	57.875	38.3099	86.4497	62.7877	29.5895	24.7744	31.6198	39.4371	38.2951	64.2966	2.39497	20.068	6.58284	18.4541	21.5806	0.924556	54.9172	24.0976	23.0769	4.6716	202.618	48.9423	94.892	2.88462	41.4822	10.7226	11.9453	8.09911	67.7611	33.1428	3.92012	9.24186	17.5259
CENPE|1062	3.02085	8.09601	12.5454	2.99309	3.18281	4.98994	7.98182	9.12523	32.7192	14.0492	8.37301	110.411	24.2606	4.25397	3.88774	15.4647	18.2931	21.2798	62.3084	19.7278	13.2823	5.55631	19.598	25.5333	12.4182	33.6602	0.842405	8.95115	2.42199	10.9204	16.8052	1.73257	23.4151	11.4547	6.75597	2.01794	23.6477	15.8217	22.8536	2.36817	39.8964	3.5871	5.13735	4.93987	16.3792	20.2686	2.82277	20.5578	14.2987
CENPF|1063	15.6835	23.7698	103.988	21.957	16.7616	29.8198	83.6845	38.8538	181.497	67.5361	56.5815	262.574	195.155	25.2813	13.301	81.1091	90.9128	64.8121	223.641	123.486	40.7073	25.7328	23.0168	56.0992	31.3591	148.73	3.19533	62.2054	16.2908	38.9749	44.3504	4.45929	76.3518	73.8714	31.5917	6.67526	147.871	60.0982	172.009	11.5754	108.863	32.5607	31.6844	29.4279	103.213	92.5181	13.6919	61.9309	21.8825
CENPH|64946	28.614	18.106	63.0475	15.0826	18.8443	23.652	31.9693	95.5592	155.731	27.0994	50.1615	107.587	99.9883	31.5344	17.6001	44.3991	50.0314	52.4094	89.663	74.2405	48.6294	22.5373	50.7054	67.3823	41.0212	44.212	14.8385	38.6308	38.1082	38.0175	38.8904	29.1652	93.0365	18.182	23.9357	12.5833	38.1535	53.1352	97.4218	15.2127	35.5716	38.9898	37.5	22.655	67.1981	55.8677	14.693	67.1382	68.367
CENPI|2491	3.30728	4.70471	11.4318	3.79611	2.21257	5.69768	13.8871	9.51654	24.9433	6.12531	7.97767	25.2002	14.6547	5.70471	1.79859	6.63193	6.0153	11.5314	22.5484	6.99586	3.43135	15.6609	9.93838	7.10215	13.2415	28.0993	1.0244	3.15178	2.067	11.0906	10.1733	3.17328	13.7725	9.95823	6.14103	1.47519	11.3193	9.34326	30.2308	2.73325	16.3801	4.26385	3.91811	3.12242	14.8875	15.8209	2.82051	8.08726	11.2548
CENPK|64105	8.9033	8.66745	10.6987	6.30896	5.33608	5.3921	18.8886	16.2412	54.1627	12.5265	27.8709	43.3237	34.9233	9.66981	5.89623	9.66981	11.8703	16.6144	35.4157	13.3815	17.2718	2.29658	18.6462	18.342	14.6462	24.4092	2.71226	12.2022	7.4717	19.1392	17.4222	3.09257	22.2417	7.09906	3.94752	2.80071	8.78243	9.28656	36.48	2.91863	19.6014	9.34257	15.589	8.81191	15.306	26.5625	3.00708	23.7305	27.0861
CENPL|91687	9.30039	14.1143	35.4353	12.7181	8.43876	17.413	40.2514	23.4134	54.5269	26.1427	22.8745	64.049	44.0847	18.0464	8.29394	27.899	38.7344	28.3795	54.9927	30.4186	20.4555	17.6914	23.7826	28.098	15.2828	43.9712	4.64074	28.8698	14.8917	34.0223	17.2957	10.5703	33.7035	30.7624	17.59	9.85819	24.9373	20.6816	28.3584	26.4731	29.2269	36.8285	25.1087	16.52	28.8569	32.3141	7.45595	33.6442	17.3133
CENPM|79019	11.9113	11.358	49.1162	27.0169	14.0486	19.4319	53.471	36.529	110.983	40.548	29.3411	94.9461	156.511	30.396	14.5174	104.55	80.1848	32.6526	114.705	96.3189	28.8321	45.9863	188.046	55.8184	57.8627	51.1943	5.79831	69.4498	26.3358	77.4034	43.1183	10.094	32.622	62.7941	42.037	14.076	62.9747	57.5248	96.7878	12.0201	74.2777	40.2936	19.4921	24.3643	109.657	53.6526	12.1816	28.905	44.1341
CENPN|55839	12.2186	8.84456	13.9058	11.1728	5.42624	10.5053	13.3419	26.9714	33.1667	20.3518	15.4221	56.2439	49.3201	10.1926	6.48107	64.6391	28.0401	10.4996	72.3699	20.3628	14.8065	27.9038	41.9271	46.9313	27.5801	56.1968	5.27059	14.5073	8.01277	12.9003	14.5744	6.99031	49.6878	15.07	30.6123	7.46852	36.5656	26.1973	103.83	6.91325	27.5861	11.9249	18.7439	9.01827	44.3142	33.6779	9.03765	36.4516	18.603
CENPP|401541	5.39496	20.8846	17.8756	19.9077	12.2519	37.7408	11.7985	10.2799	21.5722	13.5971	15.8241	23.7474	14.3169	11.9558	19.4368	34.3355	10.7287	8.42951	20.1728	13.3328	26.9672	8.63856	56.3715	25.8449	7.61921	10.5563	18.274	83.9489	43.1151	11.6448	23.2647	87.7059	20.9572	11.2474	6.40981	13.8473	8.01313	14.8176	22.6351	39.0923	23.4572	17.3784	21.2992	47.9983	16.537	21.3466	8.81133	56.6496	39.9741
CENPW|387103	10.8049	10.2321	12.4051	8.54589	2.79536	7.08703	28.0237	21.3697	49.8502	12.3402	11.5701	108.059	85.019	10.3703	7.91139	832.318	71.212	16.1329	47.8713	71.8149	23.4842	188.585	23.3434	26.644	15.4757	92.9573	7.77901	10.5506	8.51793	12.1835	10.1704	7.14188	43.9937	20.7009	13.3703	5.45675	74.5369	30.904	115.935	4.1403	23.2273	10.8919	14.722	11.0659	62.8518	22.2168	8.92722	8.0712	10.6034
CEP55|55165	8.89595	23.7345	43.958	15.6455	13.368	22.6362	50.2705	34.6497	119.194	53.7048	37.4058	244.988	129.832	17.1306	12.9422	63.689	75.9753	55.7565	124.357	65.264	43.2351	25.8651	73.5098	68.5141	34.6898	165.006	3.29056	37.7653	13.9461	24.7187	36.1137	2.38728	108.65	51.9688	27.9568	7.52717	127.338	75.8	150.889	3.71869	48.469	17.0008	19.185	23.1175	82.3426	65.7796	12.3249	31.7148	39.5819
CERCAM|51148	43.6195	87.2358	230.714	51.5542	94.2156	409.259	180.731	130.785	48.5281	236.144	96.439	72.936	64.03	37.4706	99.1573	53.9255	77.157	127.551	40.3305	91.0375	193.481	223.3	49.5189	70.7561	82.1689	63.2067	173.594	33.3786	199.447	78.5494	119.331	86.8108	125.049	83.7617	37.4077	276.097	52.4838	84.9118	122.832	23.3122	86.7097	160.516	160.227	175.383	133.465	122.53	77.1004	13.0515	107.128
CES1|1066	1.36004	60.183	15.3808	27.9105	7.07221	57.2745	6.54253	90.9941	2.17606	17.5336	14.5129	3.68447	28.7389	5.71217	24.1098	13.2023	16.9387	5.34125	24.043	1.48368	10.6414	57.0178	44.2364	19.0692	8.93323	2.00297	52.5999	4.8541	5.98417	227.703	43.3793	34.4402	16.7656	106.296	138.063	37.9367	9.32245	24.455	6.47873	3.65974	13.9713	53.3012	90.1998	138.965	17.7013	7.81405	18.1998	6.42928	283.275
CES4|51716	0	1.91499	0.825782	0.513779	0.140121	1.98459	0.0705278	1.3078	0.0934143	0.116768	0.513779	0.0467071	0.490425	0.0934143	0.698739	0.122373	0.116768	0.0700607	0.64596	0.0467071	0.0934143	0.32695	0.700607	0.116768	0.186829	0	1.37786	0.0934143	0.116768	6.48529	1.40869	0.992527	0.280243	0.610462	3.29285	0.537132	0.116768	0.186829	0.0495096	0.163475	0.233536	2.05465	2.35778	3.94302	0.560486	0.00420364	0.210182	0.0934143	8.24101
CETN4P|729338	1.08108	0.696343	1.02385	0.397456	0.317965	1.17488	0.794913	0.715421	1.66932	0.476948	0.158983	3.1399	3.02385	0	0.317965	1.13037	1.26391	0.317965	2.47536	3.85692	0.317965	0.476948	0.384738	0.794913	1.74881	2.56121	0.317965	8.24324	0.138315	0.0794913	0.874404	0.607313	0.158983	0	0.556439	2.13355	0.844197	0	0.678855	0.953895	0.317965	0.292528	2.93164	0.476948	0.158983	1.11288	1.63752	0.63593	3.47695
CFB|629	13.7136	1050.68	1764.69	692.327	128.347	201.151	541.546	322.28	6.76576	1543.86	477.454	35.0823	74.853	14.9666	573.521	247.343	3167.49	96.4472	44.9265	7.21378	2448.1	219.959	1099.16	52.9482	106.906	92.7244	329.553	2274.34	3902.4	488.055	172.339	1024.92	1412.39	746.343	152.164	282.661	357.707	7.68267	240.008	2079.41	488.808	2926.79	6182.74	836.476	311.189	756.743	278.302	3802.74	1036.36
CFD|1675	25.9269	31.4566	69.9364	66.8874	42.3637	12.7687	10.3044	263.499	3.95529	29.7034	20.8332	19.8624	46.0576	28.3611	176.33	7.60963	10.0464	25.7747	7.99226	14.7463	31.0335	30.9931	14.9553	47.3224	55.7644	8.69991	28.8444	30.0516	47.3732	40.7137	87.2984	28.4179	16.896	17.3259	10.2597	112.558	1.93465	3.18143	5.97163	12.8117	49.0972	21.2657	227.372	16.3929	6.60963	16.7102	111.641	13.0267	47.7386
CFH|3075	378.554	224.756	173.424	111.282	124.553	328.258	293.18	199.454	28.3484	251.065	159.545	65.1329	56.2077	51.3646	107.585	90.2663	180.841	54.6454	89.4668	39.5405	146.615	66.4584	153.032	113.69	228.612	151.51	135.888	43.3384	133.027	57.6806	177.149	175.616	91.4623	208.827	29.9994	227.054	12.6773	56.1362	134.265	54.7465	62.7566	133.754	282.016	208.547	177.01	101.991	181.414	57.2647	117.133
CFI|3426	33.8902	52.8939	70.294	22.7979	18.785	60.9384	17.7758	55.7818	9.4203	104.497	30.0763	14.571	20.6716	12.7768	32.6762	48.5443	155.184	10.435	15.5122	10.9706	23.9173	31.9118	30.17	37.4263	35.2085	19.5655	49.0877	23.1819	10.9674	23.2729	34.1121	73.3436	15.5567	34.1396	10.1828	46.8907	61.1484	19.8029	39.2522	15.3468	16.283	28.0028	78.6431	73.5452	21.7391	24.616	111.011	14.5471	23.17
CFL1|1072	839.165	1765.03	2804.52	1496.38	1526.57	2836.4	1917.34	1842.72	3179.64	3794.46	2567.3	3019.21	4464.99	1335.02	1375.42	3084.77	3276.96	1569.84	4310.22	3386.24	4438.02	2868.68	3535	3934.11	1966.42	2118.19	2340.12	3310.7	2748.78	2595.7	2735.78	1504.43	2827.97	1766.56	3038.24	2718.74	2772.77	3522.06	5916.16	1530.77	2445.95	2527.58	3142.03	3709.06	3406.98	4614.85	977.762	1685.84	2237.37
CFL2|1073	28.6956	28.838	23.6684	7.8105	14.1789	37.2903	14.0525	40.6994	12.3704	36.4209	15.573	77.0903	26.0423	10.0016	14.2766	23.1341	29.5278	22.6565	26.5845	14.6447	23.798	19.4782	14.4296	25.1585	22.612	54.4622	13.508	13.8156	19.9568	29.0173	32.2849	37.7065	73.9174	10.0352	4.97759	29.0141	19.1405	19.8448	78.3217	14.7407	53.967	30.8118	37.7833	35.5602	10.541	52.0423	38.6562	25.7794	18.8889
CFTR|1080	2.22077	0.482854	0.0326584	0.074951	0.0489876	0.386349	0.253103	0.146963	0.0326584	0.0163292	0.0979752	0.269432	1.2002	0	0.081646	0.228609	0.213749	0.0163292	0.179621	0.139451	0	0.13243	0.0163292	0.0571522	0.0163292	0.0489876	0.0163292	0.0355976	2.50653	0.0653168	0.0489876	1.37165	0.0653168	0.9226	0.49853	0.130634	0	0.0163292	0.326584	0.0163292	0.228609	0.400065	0.163292	0.279066	0.0176355	0.00163292	3.53527	0.0163292	0.0163292
CGA|1081	0	295.166	10.956	0	5.6108	0.142045	0	258.406	0.0710227	1.42045	0.426136	0	0	0	0.142045	0.426136	0	42.9986	0.284091	0	18.9105	0	2.84091	134.524	0.142045	0.213068	0.284091	0.142045	0.568182	5.39773	0.0710227	0.852273	0	0.142045	0.0710227	1.23864	0	0.142045	0	0	0	0.0710227	1.5625	2.27273	2.01136	5524.51	0	346.378	26.5483
CGB7|94027	6.0634	0.444939	1.71301	0.449388	0.945495	0.524472	0.302558	0.889878	0.083426	0.929366	0.139043	0.166852	0.163515	0.111235	0.250278	0.268632	0.528365	0.0756396	0.894327	0.583982	0.151835	0.333704	0.0278087	0.85762	0.519466	0.256952	0.444939	0.148498	0.139043	0.667408	0.812013	0.723026	0.222469	0.240823	1.01446	1.39043	0.500556	0.111235	0.371524	0.305895	0.0278087	0.167408	0.444939	0.674082	0.221357	0.0600667	1.39043	0.139043	0.257508
CGN|57530	45.8815	175.724	310.823	104.393	73.9891	68.067	55.1804	102.671	30.3201	51.931	74.3644	125.002	96.433	44.1116	82.6316	32.3733	62.5967	99.2365	158.636	61.4104	177.704	29.8105	62.6856	135.151	42.115	51.5413	50.0047	167.926	62.9827	205.952	301.951	92.5121	144.048	80.7363	120.886	109.538	28.5403	31.7437	58.4305	31.1655	229.621	78.9043	34.0527	71.0564	21.6158	369.908	43.7662	127.562	192.472
CH25H|9023	0.580552	7.83745	13.5806	3.77358	3.29463	10.7598	10.2315	7.13933	0.435414	8.16038	3.51959	3.20827	5.52975	1.81422	8.5312	11.0305	42.4543	1.99347	5.35123	1.92017	4.48476	11.7504	4.77649	12.1872	14.7954	8.32148	6.23512	19.2801	7.69231	4.79173	10.0617	22.6444	2.72061	2.89405	0.435414	10.3766	3.51959	2.49274	10.508	0.791727	6.69884	7.89115	15.0029	13.6705	54.5022	8.69303	16.9724	10.9543	11.9891
CHAC1|79094	1.65563	2.61589	3.04636	4.60265	0.993377	3.04636	1.25828	2.63642	16.0596	24.9338	1.35762	11.6887	47.4609	5.13245	1.45695	16.9682	13.9093	2.51656	10.6868	24.6026	5.23179	64.696	38.7642	3.01987	4.10596	17.9642	2.21854	2.61589	1.0596	2.18543	5.3947	5.5298	5.13113	4.60265	61.8371	15.257	5.56291	12.496	33.6093	0.264901	0.794702	1.15894	1.89868	1.30861	12.1728	2.63113	4.53642	6.35762	4.86755
CHAF1A|10036	25.8947	12.6268	42.7718	26.1555	22.5233	26.7969	32.8786	26.4752	99.5598	57.7407	39.6304	158.493	104.771	23.3908	19.3463	45.276	46.5422	37.4486	83.4252	42.75	43.6908	30.4877	78.468	48.6776	29.2533	47.4004	11.0873	51.4859	21.6959	35.6561	50.75	22.1205	27.977	23.744	44.6379	16.6705	52.8609	87.9306	102.098	18.7225	30.5027	32.9892	30.0263	22.9205	77.8544	52.7751	14.526	50.2844	62.5362
CHAF1B|8208	34.0257	20.505	51.6939	25.6003	35.0853	26.3013	61.8302	55.7462	222.473	35.8785	30.7723	383.403	116.926	22.9338	19.1567	79.744	68.7166	32.7906	80.4249	70.4118	26.1994	18.3182	87.8298	53.2181	43.7292	57.7105	12.8942	45.027	34.6426	33.8929	58.7997	32.2273	185.007	31.2503	7.41184	17.9491	43.7061	45.929	98.828	23.3274	38.7976	29.0579	34.4497	24.8154	79.1236	52.0266	12.7209	41.3748	40.4741
CHAT|1103	0	0	0	0	0.00453515	0	0.000453515	0	0.521542	0	0.00408163	0.00997732	0	0	0	0.0163265	0.00226757	0.00725624	0.00907029	0.136054	0.00226757	0	0.0181406	0.0122449	0	0.0104308	0	0	0	0	0	0	0	0	0.00816327	0.0031746	0	0	0.0113379	0	0	0.0208617	0.00770975	0.00861678	0.0131519	0.0113379	0	0.00408163	0.00408163
CHEK1|1111	18.8226	13.7492	26.4089	13.6789	15.1027	15.6645	43.5618	26.2241	232.648	26.8218	24.1892	157.907	79.3574	14.5609	14.6252	32.6326	45.3434	19.5151	88.0957	26.5264	25.242	14.8646	34.5972	37.4163	24.8283	59.5325	13.2372	24.4762	18.0004	30.9428	24.4364	12.3233	45.4373	28.3438	32.8816	11.9729	62.1332	61.2167	182.806	13.0616	21.6046	29.4452	23.1097	28.211	31.9428	33.1215	9.77632	26.0808	45.405
CHEK2|11200	16.6366	16.2834	47.0997	26.2	15.5977	28.2411	44.9825	21.9808	130.458	43.7645	23.2704	117.04	60.2366	27.2265	20.8546	58.6614	46.4349	76.6225	111.39	87.6935	28.0896	38.2811	45.6766	36.8614	36.1262	48.6727	13.8107	41.8068	34.5363	36.9189	33.409	27.4107	35.8237	47.6665	39.8834	16.0592	76.7735	43.4676	171.521	41.6254	51.1437	38.7121	29.2513	26.0377	76.0107	39.4394	19.693	37.0682	32.1285
CHL1|10752	3.4351	6.91355	8.68527	3.00916	1.26522	10.4097	31.4679	7.95992	2.6125	3.39899	2.09027	0.567638	3.61879	118.913	1.34728	1.79469	3.89851	1.27274	1.96635	0.347695	2.03802	1.21078	1.08891	3.9483	4.49419	4.80905	4.85433	0.841198	2.11325	1.69607	3.65354	3.48037	0.506497	1.9628	14.5817	18.3826	0	0.178225	1.23978	0.670223	0.829298	1.92409	11.6969	17.8225	1.32868	2.07509	16.1736	1.17631	2.32526
CHML|1122	21.6565	24.0658	52.5014	8.86854	26.2825	25.4438	36.2581	44.552	56.0654	45.417	23.7014	159.72	59.683	9.73327	12.1389	17.0141	23.693	11.2293	49.9856	35.4767	12.2954	21.0387	11.3866	24.2817	9.77055	39.4681	6.74485	18.3609	11.4311	10.0722	12.4486	23.2118	26.3123	19.1954	14.5662	7.31262	50.669	34.7323	145.147	33.0714	9.72522	36.0753	23.7093	31.0592	50.1596	60.4915	13.4478	20.7087	29.2055
CHMP4C|92421	67.1603	95.1895	93.5149	43.209	53.0043	96.5376	10.536	97.0574	253.324	66.1381	53.8018	272.121	193.741	63.7769	97.2989	41.6984	122.246	96.5744	228.997	45.7093	72.5355	31.7223	84.804	111.326	30.3611	61.294	48.7028	80.0433	26.2328	125.331	150.477	79.3216	33.3812	55.6914	8.93665	34.5079	68.967	92.1397	125.703	106.304	178.273	30.4461	48.0347	55.9919	105.23	82.9247	53.3167	131.316	52.1451
CHODL|140578	8.66015	0.573492	1.50807	0.411215	0.927782	0.403568	0.337723	1.72048	1.08114	0.630416	0.339847	7.14231	20.791	0.0424809	1.16822	23.0726	18.9422	0.0849618	14.7672	3.3938	1.27443	0.0849618	0.658454	1.1045	1.09856	8.29482	2.71878	0.828377	1.12574	3.10323	0.874681	1.01954	0.238318	0.127443	2.6763	1.25319	2.20901	0.318607	14.7608	0.382328	0.106202	0.356415	1.23195	0.723874	1.72515	1.36406	3.18607	0.48853	12.989
CHPF|79586	87.4689	166.283	271.531	120.057	158.121	733.409	307.364	303.957	74.5433	596.864	187.99	211.317	202.808	99.2582	167.533	398.564	238.789	170.505	141.145	209.7	192.389	881.59	205.099	281.505	111.179	128.634	312.425	159.998	359.443	121.962	163.23	127.271	119.35	152.383	150.32	401.541	121.581	245.034	167.939	92.6131	90.8872	137.464	291.182	218.62	119.366	176.609	106.358	95.9518	173.856
CHRDL1|91851	65.0593	25.8057	12.2591	9.01295	3.88601	1.5544	6.14067	67.9762	42.9987	2.42487	1.8013	19.7746	22.2573	12.6412	2.33161	17.3575	11.7329	4.02927	21.1096	7.72021	14.5176	0.673575	6.86399	29.2119	82.8977	2.68472	8.56166	2.63135	0.323834	0.764249	37.8324	23.4223	1.63212	1.68394	1.07824	33.2332	4.93782	2.16192	13.2751	6.07383	10.7863	4.14508	67.4684	19.0096	11.7256	21.2451	48.1516	7.79663	5.02591
CHRM1|1128	20.5281	1.02689	11.2703	11.6151	1.68844	0.678309	2.44219	0.772267	28.7534	15.2103	0.227035	45.5732	1.39469	2.21132	0.450576	17.3461	3.11666	0.388753	48.2082	13.5075	0.087321	21.6388	1.26825	4.13273	1.9001	2.2424	0.646175	4.79986	0.366748	1.08278	0.172896	0.914076	13.5966	0.279427	0.147049	9.48376	5.45512	2.79846	6.40936	0.957737	0.457562	0.891722	8.78764	7.43381	5.84143	0.285016	1.69857	0.00384212	4.89661
CHRNA1|1134	0.0495295	3.07677	1.01535	0.445765	5.72065	4.72412	5.64983	1.93165	0.767707	3.00941	6.53541	1.16394	0.684002	0.445765	1.88212	0.792472	3.56612	3.39673	0.767707	1.95641	6.39376	3.39277	5.00248	0.916295	3.43338	3.53195	1.16394	2.947	10.2749	2.37741	0.600297	0.346706	5.67112	4.38336	0.520059	10.3304	0.247647	7.66419	1.60971	0.198118	3.55671	2.05547	3.01585	2.01585	4.08618	0.247647	0.94106	0.346706	3.09559
CHRNA2|1135	0	1.2186	0.0248694	0	0.0385476	0.136782	0	0.0124347	0.0497389	1.42999	0	0	0.0522258	5.61925	0	0.0273564	0.0502363	0	0.0402885	0	0.041532	0.0639144	0.051231	0.0994777	0.102959	0.114151	0.261129	0.772693	1.93857	0.100721	0.0159164	0.0497389	0.0124347	0.0261129	0.0497389	0.683909	0	0.0248694	0	0.0248694	0	0.0746083	0.0248694	0.364586	0.0765979	0.0897787	0.161651	0.0373042	0.00174086
CHRNA6|8973	0	0.728863	0.753158	0.291545	1.94363	5.24781	1.72498	0.242954	0.242954	3.83868	2.84257	0.0971817	0.170068	0.170068	1.31195	0.996113	1.28766	0.388727	0.728863	0.0728863	1.96793	0.753158	0.607386	3.66861	2.30807	4.51895	1.04422	7.24004	0.558795	1.50632	1.32459	5.8309	0.801749	0.704568	0.0485909	1.99223	0	0.291545	0.26725	1.02041	0	1.31195	10.2979	2.38095	0.631681	2.73567	0.437318	2.42954	2.6725
CHRNA7|1139	3.96916	3.24675	7.89123	2.02922	1.46104	11.7695	2.5974	3.16558	19.2289	2.02922	2.27273	73.4416	7.80195	1.13636	3.73377	3.01136	3.57143	1.15422	11.1558	8.58766	1.81981	1.21753	2.68994	3.51786	3.81494	8.06006	2.92208	0.176948	2.04058	2.11039	1.16071	2.92208	1.2987	2.11039	0.974026	5.04383	6.33117	2.5974	11.2013	0.568182	1.94805	3.61364	3.34253	8.37825	1.57143	1.38474	10.6429	2.04383	2.43506
CHST11|50515	13.12	20.7722	22.2174	13.989	13.9792	61.6499	34.1626	23.895	118.731	63.5063	26.4689	11.2393	59.6465	7.65225	15.4862	22.9677	87.1984	13.2797	46.3126	43.1984	17.782	23.5957	34.9291	31.8835	39.793	50.7313	19.9164	18.2935	16.496	13.8564	12.4902	18.2982	13.9343	33.3558	3.08535	41.38	20.0986	15.97	67.5421	8.47751	5.0173	25.2266	71.7243	44.7393	52.9625	15.7647	14.5582	17.9066	19.7249
CHST1|8534	2.77879	38.2728	8.26508	4.27898	6.51335	11.7777	5.80512	12.6395	13.8936	13.8084	12.0797	7.51627	5.50274	6.08812	6.26947	35.2431	13.1013	4.66399	3.70457	7.40585	66.6611	127.728	9.05558	53.245	6.7042	6.89726	8.87678	213.867	26.7718	9.21499	9.96161	22.0578	11.8812	94.7316	9.70274	21.7378	1.09689	12.9554	8.54845	4.95905	16.1441	8.18647	17.7664	10.0633	19.7689	149.66	4.47971	34.4534	3.85082
CHST3|9469	66.4315	25.1615	35.8619	11.9243	8.42304	37.9973	16.039	17.8286	54.9732	22.7443	7.83176	34.1635	31.8962	3.69948	10.5418	8.91129	36.1462	8.35669	43.1685	16.3667	7.92663	7.24534	5.8673	8.12468	14.6333	38.0139	21.2072	4.03755	5.07595	3.67913	10.3892	17.6394	2.39137	12.306	6.39195	37.2615	30.3068	19.1816	58.6637	4.32602	5.98868	18.0874	23.9774	38.5514	4.40484	6.68931	64.0765	3.36457	7.07309
CHST4|10164	5.76923	0.101215	0.379555	0.202429	0.404858	0.202429	0	0.0506073	5.08603	0.0506073	0	0	18.3882	0	0.253036	1.72065	2.96053	0	0.632591	4.1751	0	0.0506073	0.404858	0.0506073	0.303644	3.4666	0.101215	0.328947	0	0.0506073	6.5754	0.632591	0.253036	0.101215	1.32034	0.784413	0.55668	0	0.163462	0.0759109	0	0.303644	0.157895	0.404858	0.430162	0.195344	8.47419	0.159413	0.101215
CHST7|56548	1.97897	5.49185	6.01717	4.07725	2.74421	5.197	2.54592	12.6034	7.32361	6.64464	3.73476	4.07468	14.4845	2.13519	3	11.7571	4.89142	2.61073	5.62747	6.45494	3.58584	8.24549	11.0893	10.3897	7.11974	5.01588	5.33476	5.38541	5.34249	5.84549	6.19614	6.04077	3.23991	3.20987	4.92918	8.30515	2.7133	2.33262	4.08584	2.75536	3.50815	5.4073	14.0279	5.96094	6.25665	4.03391	5.23133	7.35708	4.82146
CHST9|83539	16.0732	1.39648	4.54727	0.822499	0.154771	1.94428	0.566021	0.379411	9.44397	0.315203	0.906076	0.208809	6.52401	0.167153	0.212258	7.74211	1.21978	0.561599	1.03944	0.123817	0.199965	0.0707526	0.256478	1.10206	0.450606	0.204917	0.742814	1.2104	0.0707526	0.653931	1.7812	1.82188	0.219775	0.145927	3.43159	3.01141	0.185726	0.970991	1.31414	0.181304	0.393562	0.181392	0.517379	4.67923	0.464491	0.31706	3.89882	3.04236	0.592553
CHTF18|63922	11.567	10.4464	25.5635	25.7409	25.1136	15.7049	25.9346	24.6487	30.2074	35.6742	12.3631	48.247	48.2572	8.73038	29.0964	41.8845	18.4678	38.8989	42.277	29.0632	43.8092	28.6037	27.9703	37.0051	15.0925	36.2808	18.9454	34.6104	17.7709	19.2068	29.7071	10.9445	40.3519	21.9324	36.3354	11.365	38.2466	50.3041	26.8462	17.6177	34.7607	14.7106	17.1765	14.6525	33.3006	9.71442	6.08328	24.5552	38.1117
CIB1|10519	132.336	443.038	1033.27	3131.32	429.239	443.468	324.291	408.332	98.9638	837.822	502.435	363.988	238.618	314.583	414.232	558.608	571.594	488.177	382.434	158.302	462.6	626.526	908.115	794.91	203.94	310.887	547.744	1040.9	868.972	176.793	659.118	1106.34	407.182	375.57	585.26	746.893	313.614	312.635	449.359	757.379	473.539	692.781	652.84	540.064	287.787	594.589	332.951	626.304	650.938
CIB3|117286	0.34662	3.11958	11.1334	5.80589	9.79203	1.29983	1.83016	2.16638	0.880416	21.5771	1.64645	0.17331	0.0866551	3.98614	2.30329	0	0.606586	10.9723	0	0	2.7851	2.16638	4.59272	8.51473	1.97574	0.259965	2.33969	35.6153	4.2461	8.23224	3.4662	0.504333	0.34662	5.45927	19.0641	0.953206	0	4.10745	0	1.21317	4.41941	0.953206	16.2461	2.16638	2.16638	8.29636	0	47.3466	35.7019
CIDEA|1149	0.876133	12.3489	0.26435	8.98792	1.88822	0.528701	1.14955	40.1057	0.226586	0	0.26435	0.679758	6.11782	2.9358	0.231118	1.92598	0.793051	0.836103	2.19033	0.113293	11.7485	0.0755287	0.60423	21.5204	14.4086	0.302115	3.81269	0.528701	0	0.537764	36.2085	0.717523	0.113293	0.26435	0.26435	56.8384	0.0755287	0	2.15257	0.226586	6.38218	2.09366	125.741	4.15559	0.695619	3.929	11.9335	4.83384	2.41692
CIDEC|63924	5.00742	38.1456	3.33766	31.7338	8.05659	2.68646	6.21521	177.878	3.98701	2.91837	2.1744	12.103	17.2004	5.83488	2.55102	13.5816	5.93228	9.01577	19.051	19.0557	44.6725	2.82468	6.50464	91.859	47.026	4.90445	13.7273	7.59833	4.16883	4.35993	127.459	3.01484	7.96011	0.927644	5.47866	126.28	1.57607	3.98887	7.78664	3.75696	75.2764	13.2737	345.307	15.1651	5.8423	14.2041	34.4045	25.1187	14.7412
CILP2|148113	8.7711	10.9936	61.1654	15.7709	26.7055	202.995	56.0858	11.4362	1.02092	46.8417	8.02092	48.6796	5.55622	5.73901	27.3188	3.20157	6.07155	5.31043	2.43	8.91372	9.54195	29.9596	5.54148	3.38293	6.15997	8.75992	37.2106	5.11053	42.56	14.0872	26.7597	23.3192	9.30592	14.3095	12.9914	26.0143	10.3874	1.94058	6.38222	4.45686	1.29546	25.4868	42.3822	32.3715	3.59781	5.07725	5.93059	0.606846	8.4773
CISH|1154	40.2738	115.965	194.544	81.9533	97.4003	175.544	59.641	42.5367	16.4098	321.699	122.554	182.209	31.0694	67.8128	167.873	146.518	176.932	143.283	34.2112	20.4896	155.586	83.0662	397.241	294.271	26.2008	38.5653	258.589	151.63	169.364	61.7271	117.161	286.577	75.0512	45.6179	24.0458	109.156	29.1469	27.5684	44.7733	156.91	68.9257	78.8259	349.138	170.443	55.8459	44.9601	74.8767	257.097	163.254
CITED1|4435	1.99569	24.4876	29.5307	20.1187	21.7368	0.22438	0.701187	163.072	8.34628	3.55987	5.66882	1.40237	2.42718	1.2945	2.79935	7.01187	7.87487	3.03236	3.12837	0.809061	2.2233	1.51025	0.874865	12.6214	1.57821	1.07875	29.3959	14.6149	37.178	3.12837	3.137	17.0982	0.269687	0.862999	2.4315	4.67098	1.99569	5.98706	3.61381	1.83387	132.121	31.2438	139.688	8.19849	3.57389	33.1316	231.494	29.4218	6.90399
CIT|11113	6.125	7.43109	11.1497	3.61625	3.68412	7.54886	16.6891	13.4965	66.0976	14.0224	13.6568	52.3788	25.3489	7.3378	4.54174	9.4284	13.0356	14.3545	22.6059	31.4149	11.8587	5.81798	17.3778	16.4691	12.4458	30.7161	2.63503	17.898	5.03731	8.51819	18.5299	4.63386	23.7562	11.0697	13.2376	3.02647	18.6025	34.5703	29.4082	18.4635	37.8926	8.69088	9.13211	7.18797	24.6245	27.1832	5.1306	19.674	8.00128
CKAP2L|150468	4.18296	9.82018	21.147	3.57716	5.60684	7.94344	19.0049	12.9714	95.2182	19.6931	14.8394	134.654	31.3303	11.4106	3.85649	7.61906	26.4979	18.6816	66.3286	14.6613	11.9588	12.8492	21.2936	14.0737	21.1777	34.2301	0.925279	8.19797	3.17563	15.1152	14.9801	0.663408	29.6089	13.1023	4.58799	2.75838	61.4351	17.1334	36.6749	1.2919	35.7524	10.2811	7.7514	5.66131	37.0915	41.9242	4.13757	11.7476	10.1693
CKAP2|26586	27.3286	22.1342	61.4862	25.1066	32.8723	47.976	31.8307	87.5486	633.148	64.2859	65.3056	177.224	94.0791	25.4239	29.1307	36.1304	44.4911	34.4474	136.52	97.4595	52.307	32.7038	51.6839	100.609	62.0319	39.274	16.1139	72.6253	28.4908	43.26	43.3026	15.0499	60.6045	44.0699	29.9741	24.0524	40.8167	32.3272	128.687	32.0721	49.301	48.7927	38.53	46.3404	104.874	108.902	27.4933	134.113	62.2381
CKAP4|10970	167.495	192.607	241.498	98.4216	121.84	505.898	404.163	330.083	354.077	569.223	297.582	851.176	401.47	72.8501	133.02	169.773	377.918	252.626	510.394	253.877	201.772	913.641	223.777	189.215	179.301	322.676	179.527	236.829	306.165	168.248	257.133	180.684	344.37	551.759	516.197	259.751	258.313	158.575	387.863	153.586	383.134	345.004	427.199	298.153	365.571	250.502	129.142	326.451	310.432
CKMT1A|548596	11.2023	25.2949	21.2746	6.46481	18.7362	9.95244	7.20926	14.201	97.1497	213.836	69.7743	86.6963	57.1465	31.357	28.345	104.282	8.17692	6.81674	29.033	39.5593	34.7032	121.034	32.2353	134.904	34.1186	71.1902	17.0932	92.0628	6.46798	43.234	70.5973	21.208	21.1287	66.7146	13.007	27.6867	128.502	1.24413	1.77552	43.5257	4.97781	21.1243	11.4426	6.0558	58.2961	104.348	15.7166	121.195	21.2276
CKMT1B|1159	21.1237	35.455	36.834	10.196	30.662	12.6118	18.7226	23.5456	163.554	356.209	139.915	142.382	95.0129	51.1819	40.88	159.782	13.2578	11.3901	37.1617	66.9688	47.4654	199.174	49.7912	208.614	62.7189	93.5254	29.2407	109.564	7.85303	66.9963	103.795	37.9216	31.4881	104.219	22.8175	44.0496	134.622	1.74525	2.80772	73.6865	7.2229	31.3086	13.5303	9.70606	98.6209	158.119	26.8187	190.658	34.3748
CKMT2|1160	3.44832	4.09396	4.69933	2.8396	1.43893	4.0604	0.821477	6.14094	1.37584	3.38926	0.939597	1.20537	2.29732	1.34228	1.74497	2.58389	4.16107	2.55034	3.53289	2.88591	1.3	2.31544	0.872483	2.33221	2.24832	0.661745	3.5906	0.910738	0.469799	0.872483	7.88456	3.20201	0.604027	0.957047	0.213423	3.95973	0.671141	2.06913	1.37584	0.973154	3.48993	2.5302	14.0671	3.28255	1.33289	1.41745	5.4604	1.50268	1.74497
CKS1B|1163	159.669	203.571	719.223	194.817	118.919	151.822	507.887	255.923	614.376	427.139	327.662	1014.62	760.404	245.556	137.706	209.093	839.778	454.835	1096.59	638.19	268.231	277.649	1077.08	368.827	141.226	1398.03	113.06	330.951	270.435	376.538	214.199	187.927	656.625	531.604	316.084	129.897	667.298	353.737	819.034	209.419	481.583	401.657	277.841	189.123	326.508	310.45	108.039	303.444	207.777
CKS2|1164	55.6124	109.573	306.547	133.126	125.005	97.3668	176.36	178.807	859.478	144.195	134.163	579.791	583.671	78.5231	173.418	873.308	276.759	198.411	506.041	255.029	415.528	313.892	403.123	284.144	149.061	634.833	139.219	355.931	272.037	171.104	314.812	164.123	402.268	262.011	141.955	134.234	705.502	384.775	1054.24	110.635	450.252	222.485	164.644	248.976	598.962	302.925	77.6045	294.364	328.734
CLCA2|9635	0.173139	21.671	12.6414	4.05145	1.85333	83.3849	727.17	1.96463	1.31585	328.186	5.66535	0.261192	0.173139	0.0742023	3.15929	7.02127	1.75835	0.222607	2.64408	1.99777	0.148405	370.11	9.24561	6.26218	44.2046	0.516696	1.1113	0.148405	0.296809	9.84418	0.99629	3.61069	4.26738	363.372	1.86668	3.67128	5.76997	453.412	0.469948	1.03883	1.41603	1.44868	1.61365	5.96043	26.5422	0.818699	10.8326	0.33391	7.95498
CLCA4|22802	0.904101	0.419761	2.79464	0.297062	0.0968679	0.887956	0.209881	0.129157	0.0322893	0.311269	0.0968679	0.366484	0.565063	0.129157	0.226025	1.64675	0.63836	0.0855667	0.322893	1.90507	0.130772	0.048434	0.129157	0.419761	0.100743	0.213755	1.11398	0.161447	0.0322893	1.11398	0.100097	0.887956	0.0322893	0.048434	0.0807233	1.25928	0.0645786	0.145302	0.327737	0.0807233	0.306748	0.145302	0.177591	2.2764	0.0645786	0.0161447	3.16177	0.0161447	1.6629
CLCN1|1180	0.294118	0.377941	2.01176	3.45588	0.458824	1.98529	10.4294	0.679412	0.294118	0.310294	0.147059	0.0764706	1.25	1.69118	0	0.123529	0.588235	1.02941	0.588235	0	0	1.76471	0.901471	1.02941	0.463235	0.661765	0.441176	1.28824	1.10294	0.294118	1.71471	1.54412	3.23529	0.220588	18.2809	1.85588	0	0.808824	1.06471	0.220588	0.441176	12.4191	1.47059	2.96618	0.486765	1.17647	3.16176	0.441176	6.17647
CLCN2|1181	4.65401	13.4863	16.4747	6.79682	4.88612	11.8565	9.34888	13.5636	13.5582	65.8586	6.70644	31.3077	20.7979	11.6967	6.54375	10.8037	9.27332	9.51772	23.6999	45.8051	15.1515	11.1352	16.9002	17.5445	10.4884	28.2603	6.55098	23.8388	8.88106	9.92408	9.78489	15.2368	18.4382	3.90456	8.81092	13.829	64.4432	21.987	35.9888	10.3398	12.8344	22.7393	9.24259	10.8445	8.82936	18.3279	5.07954	23.064	18.3659
CLCN4|1183	2.23336	2.05029	3.12321	1.42054	1.70298	4.88377	1.92328	2.88089	15.8148	5.59465	2.05864	9.01793	9.97964	0.600122	2.11182	6.03494	37.5866	0.569736	41.2694	7.96111	1.19629	2.71954	2.73579	1.04224	1.83561	6.94682	1.87618	0.376026	1.23063	1.93619	1.48952	3.73671	0.941963	1.35217	1.70161	3.80583	2.89243	0.28107	25.9518	0.744455	0.455789	1.68459	4.55773	4.40109	1.63233	0.742935	4.46931	0.721665	0.858402
CLCNKB|1188	0.512821	0.295858	0.634714	0.429586	0.414201	0.374753	0.650888	0.197239	0.510848	0	0.0788955	0.630769	0.0986193	0.0197239	0.25641	0.241815	0.177515	0.0627219	0.240237	0.197239	0.295858	0.418146	0.177515	0.104931	0.042998	0.0824458	0.493097	0.930178	0.414201	0.35503	0.300592	0.236686	0.138067	0.0788955	0.670611	0.295858	1.93294	0.121893	0.0441815	0.0986193	0.848126	1.13254	0.848126	0.197239	0.0788955	1.55819	0.335306	0.00394477	0.177515
CLDN10|9071	0.884275	1.32641	0.249904	0.192234	0.153787	1.41676	0.538255	0.121876	36.5736	1.39985	0.192234	158.11	0.269127	0.288351	0.17301	0.53095	1.30719	0.348712	0.810458	43.7578	0.329489	0.365244	0.326797	0.780854	0.384468	0.153787	0.576701	0.768935	0.0961169	0.480584	0.519031	1.59285	0.153787	0.826605	4.83468	0.461361	2.82045	0.211457	11.9777	0.403691	1.0346	0.442138	0.880046	1.53787	0.192234	0.346021	8.85928	0.326797	1.40215
CLDN11|5010	9.02716	22.6897	49.4033	20.307	5.48971	35.2881	6.66543	43.7185	153.198	7.47737	8.12798	9.03663	6.73251	7.34486	11.6811	9.7856	22.0099	10.2473	10.7535	4.48519	4.57819	30.0893	7.76049	21.7078	11.3049	4.96091	32.4082	11.3547	2.23992	32.7901	16.551	42.058	6.1823	6.69877	72.7407	43.165	6.78683	17.5053	12.4193	7.23169	5.46296	15.679	23.928	105.255	19.0576	8.19012	50.8272	5.94239	7.71975
CLDN14|23562	0	0.857726	0.852961	0.476515	0.530973	3.23349	2.66167	1.56569	5.6501	1.12321	1.63376	1.39551	1.71069	0.10211	2.07624	0.850919	1.15725	0.748809	1.95984	1.42954	2.58679	10.3649	0.99047	2.66167	1.25936	5.75221	5.4452	1.73587	3.40368	0.340368	0.223281	0.646698	1.08918	1.70184	1.6678	8.12185	0.10211	2.00817	3.10688	0.510551	0.204221	1.37032	13.4581	1.54799	0.612662	1.81076	0.136147	0.315861	2.55276
CLDN19|149461	11.5422	5.44498	7.20785	4.02332	1.47853	3.93688	1.08416	3.18197	2.75547	1.86011	1.16577	1.89025	1.93802	1.05061	1.31334	1.76656	2.88939	1.69178	2.65937	2.04208	2.36224	1.26528	2.16406	4.1561	1.26528	1.44868	2.97128	3.26983	1.16434	2.58743	2.46375	4.29343	1.35058	1.40745	2.60421	4.6497	0.739266	2.09355	1.7441	1.76059	1.47853	4.59653	2.65852	7.14871	2.06824	2.10662	13.1746	2.03298	2.10407
CLDN2|9075	0.447644	0.490838	0.575589	0.474476	0.163613	1.42343	0.296793	0.245419	0.114529	15.177	0.26178	2.20942	0.212696	5.8377	0.065445	1.99411	1.34162	0.0163613	0.229058	15.4107	0.065445	309.257	0.359948	0.46466	0.327225	0.0327225	0.0981675	0.102749	0.0327225	0.0490838	0.752618	0	0.163613	0.179974	0.0818063	0.679319	0.245419	0.447317	1.25065	0.13089	0.0818063	0.0968586	1.57068	0.17212	0.163613	0.294503	0.359948	0.278141	0.556283
CLDN3|1365	134.867	200.423	279.241	334.259	533.135	144.864	182.158	1192.78	175.131	156.025	90.959	319.143	197.269	68.714	301.197	88.8672	156.847	169.206	191.857	189.303	96.6282	472.316	48.3392	555.641	136.358	123.2	63.456	139.719	447.349	392.519	467.75	299.035	320.841	61.9135	269.184	198.468	82.7656	215.456	168.423	75.83	365.423	56.893	367.816	71.5516	34.89	82.9355	66.6259	46.937	419.926
CLDN4|1364	331.469	393.477	479.954	273.939	285.765	197.585	309.644	814.987	179.676	485.709	178.878	364.042	631.492	146.286	316.876	641.236	925.378	357.988	505.123	367.748	441.735	1016.81	288.133	597.551	130.417	457.761	185.688	507.993	276.407	320.077	985.034	790.779	591.787	145.884	429.673	195.205	188.895	350.572	793.202	235.816	316.667	152.292	679.814	560.125	399.94	451.099	263.285	270.837	635.446
CLDN5|7122	3.25765	18.1639	27.6505	16.7078	12.6367	10.9309	4.40128	93.3055	8.02073	20.9526	9.25469	10.0953	20.1876	18.1145	9.48717	32.0637	15.003	6.6387	4.1461	16.2364	17.8648	14.2646	12.9556	16.6649	16.8766	7.35192	42.7414	17.4891	9.77295	11.5005	17.0775	21.4709	2.78875	9.48766	13.228	39.1106	1.08588	6.58934	20.8416	5.65153	14.2581	8.52221	42.8529	42.539	12.6491	5.38549	36.6486	3.10958	8.21816
CLDN6|9074	0.611951	0.971202	1.02664	0.215983	0.713463	0.50396	0.291577	0.4982	2.50036	24.3369	0.215983	451.068	33.0994	0	0.179986	0.791937	1.15191	0.118071	41.6364	0.159827	0.575954	0.0359971	0.538517	1.35637	0.0719942	1.35997	0.539957	1.53276	0.50252	0.431965	0.62419	0.287977	123.253	0.0719942	0.0691145	0.935925	0.574514	0.467963	17.9266	0.49892	0.0719942	0.143988	1.0324	0.571634	0.362131	0.4946	0.359971	0.0359971	0.539957
CLDN7|1366	114.246	291.978	402.768	189.556	686.663	222.948	189.779	742.547	390.354	1612.03	329.836	194.866	265.377	158.347	279.243	286.419	245.852	405.693	387.017	150.828	165.518	712.471	505.533	409.754	192.256	571.723	229.415	422.087	498.664	272.706	335.75	369.801	296.217	216.836	624.891	207.922	151.774	344.754	464.069	466.771	290.4	596.868	270.944	257.295	598.065	819.278	188.713	671.55	660.959
CLDN8|9073	66.4384	10.913	50.729	9.9447	9.55053	61.4967	29.2579	15.5173	0.829563	3.20814	1.07391	56.8366	13.8874	2.25641	9.80744	54.7004	12.8406	9.75515	1.01709	13.0639	4.12267	23.7401	26.4133	5.32831	1.83258	10.4354	44.8738	1.41076	17.7381	19.189	32.8014	31.6521	0.351936	16.1061	3.76973	82.1197	5.05681	3.03871	27.8999	5.79387	1.40975	0.452489	8.10256	166.678	13.1262	10.5867	48.4972	0.100553	9.26144
CLDN9|9080	0.405797	0.420757	1.81019	0.327256	1.82094	0.30388	1.25666	4.21786	0.762973	0.748013	0.116877	3.00187	86.1861	0.116877	0.902758	7.50725	1.25479	2.41655	18.9028	0.56101	2.53904	0.958392	0.748013	6.52361	0.606358	6.11127	2.7195	4.13511	0.30388	1.19215	3.63114	0.350631	0.460496	0.187003	2.22861	2.28658	0.86489	3.7597	3.83964	0.940626	2.72651	0.354839	1.19215	0.30201	1.91865	0.935016	0.88546	0.514259	3.02571
CLDND2|125875	0.20202	0.30303	0.353535	0.30303	0.428283	0.532323	0.155556	1.68889	0.630303	0.529293	0.386869	1.59495	0.30303	0.454545	0.30303	0.751515	1.06061	0.10101	0.252525	2.58586	1.41515	2.29697	1.84141	0.909091	0.576768	0.580808	0.493939	0.591919	0.454545	0.707071	0.783838	1.30404	0.656566	0.505051	0.353535	1.2798	0.10101	1.33737	0.216162	0.214141	0.59899	0.808081	1.87576	1.19697	0.858586	1.09394	0.555556	1.51212	0.892929
CLEC10A|10462	0.770548	6.27854	13.2785	15.2112	3.33904	1.40639	5.19292	11.1016	0.285388	1.79566	4.73744	2.11187	24.6084	5.30822	2.14041	6.00114	32.9492	0.371005	37.778	0.342466	6.75742	0.570776	21.0879	7.36016	24.5434	8.02283	4.68037	1.83904	4.96575	1.96918	11.3253	15.7808	4.2032	0.998858	0.00856164	21.5713	4.00685	0.342466	17.2089	4.68037	4	5.37329	23.5445	15.5234	39.6119	9.71689	21.2489	7.34304	4.42523
CLEC11A|6320	17.4968	30.2382	96.8208	41.8419	38.4385	167.9	71.0892	39.3282	10.7456	161.245	61.967	6.34645	40.0218	11.0415	49.0759	26.8096	31.877	16.6177	10.8686	52.1862	49.707	132.803	31.3479	28.3148	29.5018	42.3373	114.578	22.2291	241.777	33.7456	24.8911	74.1209	14.5636	36.8306	15.7583	122.684	7.37737	26.3956	35.3556	41.5952	16.5777	53.7273	111.123	99.0956	18.5081	10.7639	27.0141	4.73858	29.0379
CLEC14A|161198	7.20168	50.2429	59.7425	27.617	23.1268	34.9326	20.3923	70.875	14.4876	52.0102	28.781	22.7633	29.566	35.0071	34.2097	33.1077	45.6068	20.2961	20.2048	21.5953	58.199	38.6866	53.7469	59.1636	43.4583	19.2066	45.4012	43.3152	30.1928	43.2398	58.8617	58.6596	17.8657	31.7079	16.9778	53.9477	3.64096	18.7194	33.3014	13.703	43.5824	43.8174	110.21	61.1472	41.7779	28.074	41.2899	32.4202	47.4255
CLEC1A|51267	4.24344	9.43607	8.44389	7.50977	5.25014	3.68509	3.06812	13.0877	1.65662	8.30262	3.26633	3.32217	7.14796	4.43886	5.66723	16.3099	17.6438	3.15466	7.3043	2.0938	6.61642	3.68509	10.4132	15.3099	10.3646	6.56058	9.65941	8.29816	4.15969	4.36572	6.756	8.96147	3.96427	5.49972	2.76382	8.43104	2.0938	3.51926	8.04858	2.68007	6.81184	6.16248	17.1971	13.1491	11.679	5.30095	16.6946	4.10106	6.5885
CLEC3A|10143	0.20377	6.41773	2.69995	0.0509424	0	0	396.102	1.88487	0.483953	4.85023	0.254712	0.254712	0	0	0	0.0509424	7.60978	0	0.789608	0	0	592.096	0.00662252	0.0101885	441.583	0.0509424	100.071	0.0509424	0.0509424	5.04738	0	2.69893	5.4651	678.101	0	0	0	0	0.305655	3.38767	5.09424	1292.4	0.0509424	2.16505	20.6867	0.0611309	1.1462	0	8.57005
CLEC3B|7123	23.0763	38.0701	48.8548	34.3917	18.562	57.1627	16.9237	111.218	4.19274	578.412	29.2741	10.1464	26.2065	53.0501	17.1627	90.3279	28.1652	21.6571	22.6058	32.2378	74.0388	68.8573	84.9174	72.7459	22.6308	24.9787	59.9499	81.0964	26.0325	45.0275	59.0275	78.1189	18.7647	18.4143	6.03755	101.434	2.81602	8.60576	25.617	17.3967	35.4819	53.9762	113.477	42.0238	36.3667	26.4756	148.484	75.6783	26.4305
CLEC4F|165530	13.2718	0.558905	0.510204	1.86781	0.766698	0.297774	0.590909	0.0927644	5.5385	0.0927644	0.510204	0.0463822	0.470315	0.258813	0.484694	3.76531	1.84879	0.0927644	7.17672	2.68553	0.382653	0.139147	0.120594	5.32978	4.79685	0.742115	3.08442	0.62616	0.301484	0.440631	3.0436	2.50464	0.556586	0.0463822	0.162338	0.649351	0.371058	0.162338	11.8316	0.510204	0.185529	1.78571	2.69017	1.97959	0.185529	0.62616	2.35019	2.94156	7.77458
CLEC4G|339390	0.0726216	0.125635	0.271605	0	0.43573	0	0.15541	0.217865	0.00726216	0.0726216	0	0.0726216	0.290487	0	0.0145243	0.290487	0.232389	0	0.580973	0.0726216	0.87146	0	0	0.145243	0.689906	0.145243	0.0726216	0.149601	0.0733479	0	0.43573	0	0	0	0.0726216	0.703704	0.0363108	0	0.371097	0.136529	0.254176	0.363108	0	0.145243	0.0791576	0.00580973	1.0167	0.217865	0.0726216
CLEC5A|23601	1.46426	4.00203	4.66618	0.566531	12.3736	24.2751	8.29808	3.51656	0.671993	40.9791	2.09181	1.0459	28.1002	3.10866	9.10081	2.51714	12.4463	2.19204	22.1798	1.72894	13.622	1.51162	2.10895	20.5877	1.7853	17.2568	7.59704	34.1705	33.2873	2.07728	2.90238	9.02673	0.915166	3.89309	1.97414	5.00726	10.7618	0.581058	15.3524	1.0459	0.377687	24.0636	17.8196	20.921	3.22661	22.1842	2.51162	11.7159	3.43841
CLEC9A|283420	0.777047	2.46204	1.35386	1.6061	0.285714	1.91154	1.11476	0.820084	0.0298864	0.597729	0.627615	0.268978	0.806934	0.438733	0.767484	1.58816	5.33114	0.149432	0.95517	6.81769	0.349671	0.508667	2.31261	3.1052	3.65152	1.55409	0.673042	4.99582	0.268978	1.41662	0.41841	13.9426	0.744172	0.0298864	0.119546	2.68679	0.328751	0.0896593	0.893604	0.971907	0	0.687388	6.27017	2.52959	2.81829	0.918111	3.17274	2.79139	0.239091
CLGN|1047	0.430725	52.327	181.709	8.38119	2.88765	135.914	55.7118	71.3805	138.938	28.4602	6.27172	16.2922	45.8471	5.29576	12.4156	3.94293	0.915291	132.987	1.48959	0.610194	15.2674	3.71321	16.4698	14.4436	0.143575	0.538406	2.47667	52.57	6.26346	592.112	10.6945	10.5966	26.7907	146.234	15.822	10.2548	0.610194	0.0717875	57.6626	64.8471	129.981	2.25951	55.3485	13.0668	2.54666	20.7035	23.7175	114.308	0.807609
CLIC2|1193	3.69008	45.7029	38.5764	30.5602	22.7023	20.8166	29.0329	43.5385	14.9889	25.0111	27.7057	22.743	33.8735	15.6683	17.767	33.7993	88.068	10.6878	45.5195	8.72297	28.2369	15.8227	45.1555	57.3757	71.3417	56.2653	20.6377	17.1421	10.0396	27.2241	38.4091	55.7926	20.9638	20.7146	17.1355	45.7954	11.0373	9.28651	29.0039	18.597	14.9331	17.7007	110.83	64.2921	75.461	31	46.9727	33.3573	36.5011
CLIC3|9022	9.6187	13.8192	22.0209	7.60763	68.0492	8.84625	12.7085	17.4256	1.04551	50.6753	5.91882	0.715867	35.31	29.107	14.7811	6.81427	85.4699	7.52153	4.99877	2.95203	5.93112	59.3739	16.08	171.237	22.3173	46.0221	116.363	4.46371	9.75277	7.66544	34.8856	6.75523	82.5105	18.5535	13.6531	13.8672	3.2829	2.33087	8.42804	10.1488	33.5892	10.7183	9.3936	10.7811	7.28659	1.59287	6.3567	2.57442	24.1046
CLIC5|53405	3.71901	11.4657	10.8329	4.73915	3.34452	4.95739	7.28822	6.8298	3.61467	2.13146	9.03796	7.2766	3.61441	6.83884	2.7376	2.88068	11.7911	2.95713	7.82412	0.916839	6.08368	2.11777	5.97831	12.0325	18.103	6.12319	4.79055	2.68698	1.98864	2.42769	8.33704	7.07645	3.15083	4.01472	2.86674	12.9158	0.619835	1.9734	3.03745	5.42355	4.20971	3.5439	29.5532	11.1857	10.3936	9.09659	10.9104	18.3053	4.30114
CLIP4|79745	23.9552	45.433	30.6118	16.7169	5.87893	35.9974	11.8121	55.0151	32.3093	66.4726	15.726	33.1586	132.587	5.04007	23.3046	37.2469	24.5131	16.3701	26.5446	16.9539	18.4403	12.0474	11.2762	57.3408	30.7785	21.9302	26.1465	32.0121	6.74278	21.0211	78.0745	34.567	8.14304	10.1465	10.4265	35.7436	32.6523	5.06247	47.4989	7.69065	14.7135	11.1896	54.5166	76.3399	20.4632	9.13701	48.0396	4.91168	42.6713
CLN3|1201	97.4762	287.082	558.994	163.961	645.327	418.821	377.333	385.473	76.2128	305.004	129.39	307.817	138.135	217.284	495.027	169.052	232.635	159.699	180.139	138.758	367.027	160.972	674.615	660.297	98.2251	141.464	213.865	408.509	342.459	642.469	273.876	281.634	335.323	463.54	386.488	232.302	166.367	388.298	240.657	476.025	149.987	411.499	301.032	435.224	414.093	212.392	176.045	276.654	360.058
CLSPN|63967	3.35007	2.62798	10.6259	2.62611	3.54858	3.56142	13.8396	7.84447	79.7919	15.0563	9.31691	79.0028	34.3157	5.0327	2.32368	4.80827	9.28421	3.66534	44.3295	3.12634	5.14946	4.86805	13.3251	5.8489	9.73727	16.2709	0.397011	2.96941	1.05091	6.42106	12.4696	0.537132	12.9484	8.27767	2.46217	1.63475	12.3129	15.4893	26.4823	0.758991	16.3884	4.83419	2.73237	2.37366	19.666	24.8851	2.84914	7.14386	9.11957
CLSTN3|9746	33.4013	101.692	188.688	74.9223	56.8764	150.935	77.9064	105.826	405.801	365.676	61.863	174.3	343.014	45.2492	45.6823	109.311	305.143	57.5813	198.376	66.5885	83.4828	183.931	52.9365	113.541	123.062	73.8774	90.6709	193.989	125.908	73.5217	169.132	108.876	117.528	78.5036	102.032	133.178	50.3264	165.855	109.798	114.627	31.6101	121.434	158.623	100.118	125.167	89.8059	65.9474	84.2425	35.7657
CLTC|1213	176.214	382.215	573.36	192.429	286.091	682.177	338.177	604.299	410.054	946.232	2923	852.045	280.929	289.533	220.834	128.4	387.823	788.194	314.349	216.667	253.723	338.249	858.591	479.749	255.064	226.951	159.063	240.849	287.964	689.532	714.373	190.986	429.382	724.293	165.25	568.031	115.268	180.724	322.926	329.766	827.16	530.113	408.578	390.393	558.208	744.407	290.138	562.571	514.981
CLU|1191	118.765	1952.65	1253.39	387.433	1447.97	8977.66	963.676	6970.94	21.7209	2055.77	70.517	75.2316	112.548	1960.78	344.401	1642.6	9099.1	685.175	117.184	18.8674	628.796	392.361	380.947	678.962	184.174	248.56	680.134	4130.34	5460.52	4669.03	4537.95	657.066	264.439	4863.11	154.084	1539.23	288.016	199.767	502.836	347.51	1244.32	2532.39	1120.91	1442.36	2230.84	2439.98	954.539	3166.8	1227.31
CMA1|1215	1.05932	3.81356	7.1935	4.16667	6.4209	2.22599	1.40113	5.35734	0.141243	0.564972	1.34181	1.41243	4.14407	0.847458	1.69492	0.0706215	0.353107	0.49435	0.141243	0	3.76554	0.282486	0.635593	6.38842	4.87288	0.230226	10.4492	0.282486	0.211864	1.9774	3.74011	4.44068	0.0706215	0.211864	0.0706215	14.3192	0	0.564972	0.211864	0.353107	6.07345	4.64972	7.60169	2.9661	0.699153	2.64124	9.11017	1.05932	5.36441
CMPK2|129607	3.07571	89.1384	15.865	5.94237	11.8831	18.8503	56.3102	44.1932	15.9017	30.4345	18.8181	50.2446	33.5718	15.1898	8.41751	36.4599	64.0299	20.0339	39.9633	13.9763	13.6305	13.3825	172.077	74.8186	163.835	147.083	8.95085	17.8898	27.3701	18.165	25.5763	27.7955	101.678	38.0282	4.07175	18.5977	58.0305	12.7045	52.3678	5.67232	29.9045	14.5859	41.4056	26.6576	32.2412	35.465	49.8791	87.6977	36.0034
CMTM5|116173	1.40526	0.368087	1.1786	0.453309	0.00271985	0.784225	0.19583	0.634633	0.271985	0.00271985	0.181324	3.76247	1.0272	0.271985	0	1.72257	1.233	0.271985	18.631	8.83953	0.0906618	0	0.0453309	0.181324	0.0906618	0.0906618	1.63101	0	0.0906618	0.135993	0.826836	0.815956	0.0453309	0.0906618	0.0099728	1.04261	0	0.0906618	0.271985	0	0.271985	0.113327	0.135993	1.15775	0.00815956	0.111514	3.39982	0	0
CMTM7|112616	185.379	41.1742	102.419	51.4091	155.681	49.8008	25.2235	28.2864	60.3614	48.5795	36.7462	573.282	178.011	11.3621	50.0538	368.539	383.15	25.647	296.293	544.261	181.99	22.9417	65.8045	86.7386	55.4114	256.457	80.9545	41.3682	209.858	30.1167	223.457	63.6818	26.9242	68.6553	50.2848	94.0167	245.212	26.0379	225.164	13.1061	18.847	114.129	105.398	99.7402	75.4992	30.6879	82.9553	37.8076	55.9606
CNFN|84518	6.18467	8.10105	26.5679	10.2787	4.12195	11.7596	27.0906	35.453	17.9443	46.6899	10.2787	6.27178	17.0732	22.7352	23.3449	56.2056	19.8606	2.96167	19.9826	57.0557	7.22997	47.1254	45.6359	34.378	2.96167	8.12892	71.8589	163.869	37.2822	16.4634	6.5331	35.5401	3.57143	9.83449	48.2578	26.2195	31.446	9.23345	4.89199	49.5645	4.87805	20.3833	12.892	9.7561	7.8554	13.1812	12.5436	19.8153	11.0627
CNGA1|1259	5.27061	1.53728	2.51864	1.5405	0.303584	0.537634	0.268817	3.29749	3.52186	8.52796	0.394265	5.1767	8.19032	0.358423	0.404301	13.5846	3.19032	0.645161	29.8176	1.61004	0.501792	1.43369	0.988172	2.35412	1.33584	2.46989	3.37885	1.1233	0.291039	0.478495	6.63763	1.42724	0.394265	0.232975	1.93584	2.68781	0.268459	0.430108	0.803226	3.39785	0.483154	0.555556	2.31613	1.43692	0.512903	0.425806	3.94839	0.555556	0.516846
CNIH2|254263	3.39528	8.75625	13.4024	5.43245	5.21801	4.40529	19.0157	21.6254	282.879	15.1851	24.5625	99.0429	57.5147	11.7584	3.39028	8.62759	2.74196	6.89778	120.523	67.1208	37.6662	11.5082	30.2845	15.6991	29.1229	6.04503	3.00214	17.7262	6.89778	11.4367	13.8678	1.82273	26.5189	12.5804	21.6226	3.995	14.6176	59.3803	91.1315	0.536097	4.11008	7.59543	6.73767	5.97641	47.9221	13.4682	1.32237	6.25447	6.83631
CNKSR1|10256	39.8954	31.7054	78.0205	52.8072	48.701	34.8749	28.419	83.6585	56.5928	42.3391	20.1566	60.0433	27.0157	36.9493	51.8391	65.1448	65.8714	22.4095	77.9764	54.3037	119.751	39.6967	136.181	111.75	14.2895	72.9367	53.6562	155.81	48.3871	25.085	69.098	50.4363	45.6117	39.8029	74.3969	53.8407	33.5881	41.3124	57.64	62.4489	62.1263	43.8533	35.0472	60.2246	27.3647	91.8843	38.3383	110.051	49.1377
CNKSR2|22866	5.17982	0.487656	0.670527	0.563852	0.338616	1.67418	0.82292	1.66108	13.8488	0.396221	0.380981	17.007	9.01859	0.19811	0.0914355	0.426699	0.0941786	0.309966	0.991771	0.627857	0.121914	5.19506	0.0914355	0.304785	0.792441	0.777202	0.350503	0	0.060957	0.182871	1.67815	0.838159	0.152393	0.121914	0.152393	0.960073	0.243828	0.0304785	2.81804	0.29107	0.167632	0.0914355	1.58641	1.09083	0.884791	0.353551	1.22249	0.200549	0.152393
CNN1|1264	17.4136	88.2802	85.0448	34.5032	18.9255	92.8623	57.7786	106.081	14.9298	44.7057	18.0346	3.86879	38.4795	15.9827	17.6836	131.077	58.1058	37.5977	10.7181	45.4914	36.2306	99.885	25.6755	44.5977	19.9514	19.1496	151.725	33.0022	10.9881	18.5945	174.738	153.628	8.58531	55.3969	9.88121	124.08	7.01944	22.7835	54.0227	9.50054	6.58477	93.9914	87.0432	201.564	2.59989	32.6042	163.612	3.02538	29.2657
CNNM4|26504	37.8876	99.9678	177.3	34.3154	46.748	108.52	50.7289	141.595	53.4313	96.4035	65.6009	67.8442	95.8126	39.1968	40.6546	28.6315	80.4781	101.187	64.1905	74.4681	118.846	49.2673	64.777	162.203	34.2261	44.2177	36.7898	75.4254	54.9756	139.093	115.031	52.9263	275.542	146.013	28	61.6118	72.5359	51.966	53.4891	60.8223	105.833	123.499	94.8373	92.7598	66.0503	144.923	66.7642	144.161	48.2564
CNR1|1268	1.81994	2.31994	1.15703	2.15547	1.75744	0.190963	0.14162	9.64907	19.9543	1.11063	0.796399	0.564578	0.443213	0.493421	0.796399	0.896988	1.20187	0.271122	0.487535	0	0.315616	0.0692521	0.905471	1.02597	1.64352	0.331891	1.88712	0.115651	0.0865651	9.25641	1.89699	0.97732	0.0519391	0.0865651	0.294321	1.56977	0.00865651	5.4285	1.38504	0.874307	0.1991	0.533241	3.47126	1.97697	1.13972	68.834	3.59159	0.406856	0.348511
CNRIP1|25927	9.90962	32.1706	43.7014	25.5553	21.6153	87.2805	36.9812	45.5857	20.5712	53.0991	24.1323	14.316	23.2401	15.5098	36.5719	29.6464	35.4845	17.1663	17.7679	25.2061	46.6782	33.778	27.2444	46.5163	31.5929	18.3406	40.3391	30.7824	32.4613	28.5293	36.5025	43.3391	11.3955	21.5293	11.8048	67.893	8.78453	20.4447	26.7166	16.4317	23.2379	36.0824	80.7693	62.7607	29.3507	24.2437	40.0412	22.7274	26.5936
CNTD2|79935	0.368681	25.3918	25.2165	9.21484	14.4154	1.04396	0.686813	60.5335	12.6676	2.55495	30.7324	3.32418	1.62802	3.02033	6.29286	1.64835	2.12253	9.3978	4.97912	1.72253	6.97692	3.79121	18.9253	179.445	0.607692	9.13681	1.33352	29.8692	27.6066	27.5209	4.01593	10.483	56.8346	0.819231	76.8797	4.80659	5.87582	0	2.19066	16.2659	79.2984	23.3577	17.7527	3.6989	0.246154	5.35549	1.95055	282.984	4.76209
CNTFR|1271	9.346	3.2	2.35	3.675	66.7285	0.25	0.603	12.2615	109.102	0.3045	1.475	25.9185	1.9	0.625	14.1725	2.175	1.557	0.802	94.9115	32.5245	3.875	0.425	0.125	7.018	8.524	0.2	3.6245	0.475	0.55	61.243	28.935	0.975	63.93	5	0.45	21.116	0.875	18.0255	0.4	0.5	3.7	2.859	28.4765	2.2	32.958	1.006	6.9495	0.5	3.25
CNTN1|1272	13.0562	8.36177	28.8248	6.749	6.4621	177.211	57.4578	5.09359	98.9481	20.4817	10.1703	9.05186	3.18226	2.45474	17.0743	0.536975	2.97637	2.88524	102.737	0.659712	3.16048	7.00828	0.463332	1.38294	3.43971	5.74593	6.97699	2.57993	12.9165	6.67383	1.00644	3.92298	0.782449	11.8748	0.951212	13.0881	0.168763	0.83093	1.15066	1.47284	0.951212	27.1651	13.9159	25.8954	2.15066	3.41332	11.1844	0.352869	7.18012
CNTN2|6900	0.141368	0.167874	1.34653	0.23308	0.14985	0.11009	0.291571	0.0883548	9.99205	6.56388	0.125464	0.618484	0.639159	0.344584	0.158509	0.159039	0.160983	0.0235024	6.82965	0.142605	0.0280968	0.203216	0.0904753	0.2041	0.38187	0.0530129	0.0706839	7.48595	0.161336	0.0353419	0.249337	0.212052	0.901219	1.07793	0.362255	0.198975	0.318077	0.0706839	0.0660894	0.071214	0.0795193	0.441774	0.203216	0.0890617	0.268599	0.0736879	1.13819	1.51334	0.0374624
CNTN3|5067	2.07164	1.17971	4.1739	0.340204	4.08885	4.6746	1.91435	6.96498	2.71123	14.634	0.61677	0.810486	4.48249	0.45027	4.44146	0.509105	0.347208	0.58315	0.688813	0.280168	4.70682	0.806284	0.580348	1.04943	1.39184	0.243146	0.959576	24.1151	5.53432	5.17591	13.0102	0.730438	1.4931	1.58815	2.55613	1.34521	1.08065	0.45027	0.490294	3.55073	0.580348	4.25015	4.52572	8.74625	4.35181	8.08725	3.15029	2.61897	0.729438
CNTN4|152330	8.03939	13.7532	41.5	4.47903	10.0245	105.398	29.5429	9.19632	45.3034	14.4854	11.3602	2.16518	11.1522	2.43011	9.59339	11.5159	2.43011	1.94091	11.5889	3.669	53.0753	5.40025	3.90724	3.89231	2.22586	8.63564	13.04	1.92186	20.5105	9.73634	13.1512	11.3564	0.841804	4.43139	3.32084	47.1671	0.158831	0.528272	6.43266	17.724	0.682973	19.0289	11.5295	53.3208	4.11213	6.25286	19.0178	6.1798	4.4155
CNTN6|27255	0.534682	0.115607	0.187861	0	0.15896	3.84393	0.479769	0.751445	0	0.351156	0.260116	0.115607	0.0289017	0.115607	0.0898844	0.433526	0.0320809	0.0179191	0.082659	0	0.0323699	0.765896	0.0578035	0.118786	0.0289017	0.0893064	0.17341	0	2.48555	0.231214	0.0289017	0.260405	0.0578035	0.231214	0.0578035	0.33237	0.0867052	0.0578035	0.0615607	0	0	0.180058	0.0578035	0.491329	0.0433526	0.120231	1.14162	0.0294798	0.0289017
CNTNAP2|26047	0.676482	4.93384	2.59303	19.3809	91.0947	24.2218	26.1734	15.2705	7.44882	37.9417	7.78724	20.7573	12.1976	133.876	39.9608	0.816439	1.97131	3.96705	10.0018	5.11841	49.1803	8.79113	20.5077	28.2362	40.2496	1.05651	66.9635	6.01403	0.481894	3.264	5.66997	22.8981	5.12354	3.93434	4.0015	32.6167	1.86668	692.185	0.866558	37.5341	17.3525	5.87996	1.90452	63.457	42.5821	96.1113	1.70455	13.4836	30.16
CNTNAP3|79937	9.46314	3.2902	6.58505	2.70271	0.759417	2.98319	0.627785	5.10328	4.83921	1.25395	0.951397	9.9032	3.00972	0.668287	0.891049	7.20312	1.39085	0.984002	7.82098	4.23248	0.915148	0.212839	0.64277	3.95281	1.57493	1.3868	3.33941	0.750506	1.27582	0.629202	1.93196	4.27035	0.121507	0.425273	0.445525	3.56804	2.55164	0.172134	9.82523	2.05549	1.13406	0.805387	4.0646	6.02329	0.641353	1.79567	10.3761	0.530377	1.36695
COL10A1|1300	32.0659	314.653	295.62	89.5761	280.226	1959.32	684.7	150.242	80.8452	1433.67	283.575	16.3741	69.0922	29.0021	425.63	102.195	115.172	212.696	31.9335	131.312	411.259	405.862	91.2437	107.781	87.1297	116.766	286.503	74.1131	713.098	88.2972	69.0674	138.176	52.3849	562.873	25.4137	581.746	2.59964	79.3786	49.2359	88.7856	18.1724	456.192	510.853	733.306	14.7339	79.2927	28.4497	12.6039	246.127
COL11A1|1301	236.664	105.22	131.625	5.40117	133.95	1871.64	506.749	53.6054	52.0687	783.601	194.98	16.3019	55.8706	12.2728	244.786	13.5205	71.3456	90.8391	39.4147	82.0163	403.195	171.045	77.4633	46.1118	9.53889	114.864	189.615	42.6238	486.325	11.3991	20.1383	6.05659	28.2053	377.559	18.1634	365.507	6.20226	85.1811	31.9214	26.4718	8.8298	381.829	223.186	232.081	3.0138	29.5064	1.11848	5.70254	145.085
COL12A1|1303	37.6658	332.306	597.051	77.1782	323.241	3040.5	977.394	232.678	81.8069	1105.29	368.581	99.1726	134.128	45.8584	409.279	84.2333	234.884	197.486	101.226	143.054	786.532	346.076	180.467	247.089	296.565	252.747	328.633	139.11	849.315	174.301	110.685	202	107.74	579.78	22.6463	535.998	69.5121	161.547	220.861	149.089	79.645	575.375	753.387	702.972	103.015	173.779	110.977	198.958	394.392
COL14A1|7373	85.0543	187.61	564.278	268.236	122.385	936.767	518.47	365.575	14.6972	60.2424	119.84	33.4196	70.1273	63.1435	227.233	67.6289	120.925	34.6055	27.9968	19.2172	86.8583	176.118	34.3398	55.6681	129.048	35.8655	259.683	51.8519	60.8871	114.632	289.896	617.084	33.201	79.4524	29.1909	315.246	1.99569	24.7648	105.711	67.009	33.3614	197.791	657.535	540.983	34.0557	181.49	454.131	35.6544	110.117
COL17A1|1308	910.416	393.278	483.499	202.159	43.3699	263.02	56.6703	292.555	0.816428	52.9261	32.6422	9.47354	22.5011	38.5458	31.6571	3.00606	92.0011	42.7856	10.1119	12.7536	2.37376	3.11466	39.6792	90.2784	55.8793	8.34454	180.92	26.9587	9.68192	32.339	10.1488	255.779	18.5391	45.4846	22.081	368.797	17.9653	2.25524	55.0441	20.387	22.8032	236.891	55.9735	464.978	4.10088	50.0491	743.852	2.73484	12.1621
COL1A1|1277	395.666	3496.25	12793.2	2328.71	4237.8	60131.7	18170.3	3749.57	1493.22	18611.2	7298.64	965.02	3087.84	503.422	8841.01	3407.99	3788.49	3366.04	954.738	3143.24	10296.7	12234.3	3355.2	2159.12	2853.53	4548.71	13947.1	3212.62	21812.8	2500.88	3590.05	4694.9	1545.78	5153.56	512.703	22878.3	556.62	5231.77	6105.84	1342.17	804.93	10433.4	15908.3	10581.6	3401.87	1761.1	1651.84	540.411	5317.87
COL1A2|1278	2907.4	16656.1	50516.7	9509.07	18237.5	225359	78767.3	15768.8	6093.53	71920.1	31631.4	3626.49	10449.9	2565.43	33004.9	9510.92	11429.4	14480.6	3802.59	9665.17	42845.2	33429.4	11679.5	7571.35	12503	17162.5	34455.8	9010	62216.1	12348.8	11392.1	20639.5	6342.7	22642.3	1623.35	77792.9	1686.55	15332	19785.2	5585.12	3700.29	46998.5	53319.8	53685.6	10721	9670.24	9011.02	2119.56	26965.9
COL22A1|169044	0	9.96366	1.20487	0.404329	1.36007	4.66641	1.82992	2.16641	26.4592	10.0897	2.86046	5.21415	29.1544	0.463858	1.68032	26.2014	3.33166	1.45516	80.3945	1.48241	5.63278	4.09432	2.04523	2.30808	0.695787	21.8647	1.40839	1.18496	1.43023	0.463858	0.81407	1.05334	1.35988	2.56939	8.32625	3.0978	0.096637	8.03692	3.85543	1.17897	0.33823	2.15559	2.47468	2.66448	4.18013	1.39138	0.676459	0.901044	2.30228
COL23A1|91522	2.25771	2.96439	3.55507	2.09141	3.63069	2.18429	0.265051	2.33113	1.74009	2.09068	1.45007	0.609398	4.54772	0.990088	0.825991	3.36527	9.20705	0.424376	2.20595	2.3862	1.26652	0.715859	2.12078	1.22137	1.08003	1.00037	2.40419	1.39501	0.991189	2.20007	1.70705	2.58811	0.770925	1.45007	7.41446	3.38326	2.99192	2.54956	2.37298	1.24816	0.385463	0.817181	3.06021	1.91924	2.38693	0.844714	2.61968	0.385463	1.78047
COL24A1|255631	0.877134	2.99938	2.50146	0.612948	1.65354	9.72121	4.34538	1.86698	1.17946	7.31432	2.46579	0.76088	1.81532	0.703521	2.70583	1.67138	2.60464	1.26757	4.25158	0.553591	2.73089	1.4215	3.42719	2.97863	1.21605	1.98908	1.39274	4.25204	2.06366	1.76349	1.13886	0.742888	1.40304	1.98585	0.869291	4.1467	0.29248	1.3626	1.5396	1.68138	2.80809	3.58542	3.15024	2.07028	1.20268	1.81562	1.03844	2.96694	2.22097
COL25A1|84570	3.26966	0.920598	1.76448	0.249329	0.652091	1.7453	0.942463	5.95781	4.75911	1.25163	0.460299	3.10779	5.58842	0.517837	0.517837	4.92712	1.35175	0.313003	1.84925	0.104718	0.522823	0.153433	0.0958957	0.995397	5.39816	0.213272	1.03452	0.226697	0.21097	1.3809	5.14001	0.729191	0.249329	0.11776	0.23015	1.58458	1.96701	0.767165	0.67664	2.01726	0.920598	0.466053	0.922133	1.42232	0.289221	0.345224	3.64058	1.07288	1.69083
COL28A1|340267	46.1294	1.99772	0.97032	0.494673	0.840563	2.70167	1.28539	0.437595	0.399543	2.76218	0.171233	0.289574	1.0137	0.136225	1.6172	5.34247	14.5628	0.461187	3.55556	0.87519	4.88965	0.570776	3.04414	3.30099	0.214231	0.0380518	1.29376	8.85236	0.589802	0.818113	6.5312	0.652588	0.951294	0.342466	0.0951294	1.26104	0.0380518	3.80518	1.1796	1.6933	1.71233	2.67237	2.18569	0.467275	0.766362	1.16058	3.00609	8.37519	1.73135
COL3A1|1281	2189.27	5536.29	20856	5184.22	6099.65	76494.3	31039.2	6758.11	2196.06	23466.2	12662.9	1632.83	4632.75	1026.22	9781.56	2841.58	4508.4	4731.72	1681.42	2853.34	14567.4	11515.9	2853.69	2695.25	5370.8	5744.07	10296.7	2311.97	16934.5	4229.78	4303.56	10406.8	2338.64	7714.74	433.288	24751.1	545.207	4774.1	7785.17	2199.37	1843.33	13390.2	18223.9	22866.8	4923.32	4258.3	4299.31	840.643	9552.56
COL4A3|1285	0.100262	0.439056	0.724115	0.117955	0.72228	0.101835	0.164613	0.375098	1.95216	0.162779	0.0589777	0.710616	4.08571	0.0200524	0.239581	3.98152	0.950197	0.0456094	0.545478	1.22084	0.0900393	0.113237	1.27221	0.508126	2.47706	0.30865	0.144037	0.0268676	0.0145478	0.0458716	0.213106	0.125164	0.11979	0.131062	0.142333	0.4173	0.0196592	0.223067	0.163827	0.288336	0.0327654	0.0964613	0.879292	0.284404	0.647182	0.152425	0.514417	0.112713	0.059633
COL4A6|1288	23.1556	8.02717	9.90432	4.70483	1.34812	6.8941	8.17092	5.83093	0.531584	2.17278	1.41547	0.800975	1.08918	1.02253	1.56921	1.02833	2.25383	1.70483	0.477009	0.545518	0.321644	0.751045	1.60892	1.87599	2.6412	0.333256	3.75012	47.4394	63.0434	1.6261	3.34626	6.97863	0.454714	64.1732	0.342313	5.32118	0.255458	2.44124	2.33651	4.69763	0.928936	7.29772	3.14631	10.0936	0.631677	1.82606	17.1941	8.93451	2.02044
COL5A1|1289	122.785	205.657	594.468	103.173	219.514	2808.1	822.84	275.031	138.22	1023.53	385.453	58.6122	169.817	36.5646	389.374	193.213	202.933	185.255	106.269	141.168	529.281	613.656	133.501	120.988	183.311	229.232	519.099	128.461	658.658	111.663	192.76	213.046	83.8598	298.053	49.8828	1025.34	50.4706	246.948	308.457	116.445	63.3622	585.648	747.917	518.148	195.728	102.108	104.009	35.4788	266.382
COL5A2|1290	114.547	444.907	978.094	182.178	388.007	3410.74	1551.46	399.332	173.64	1418.55	698.76	90.1626	241.157	76.1566	517.773	201.069	263.228	302.896	116.791	184.15	711.872	538.988	206.806	229.097	357.518	365.009	475.801	128.67	724.858	197.085	214.995	429.678	147.1	608.23	36.1388	1088.18	36.5019	288.352	324.627	148.647	102.013	691.974	1072.75	1186.07	187.218	261.029	188.081	56.1885	488.918
COL6A6|131873	23.0094	0.571247	4.80482	0.586163	0.706125	3.77705	1.29118	2.81704	0.308632	1.16534	2.49191	0.182482	2.44462	0.634719	1.17153	0.0793399	1.47572	0.535386	2.14107	3.23548	0.248175	0.190416	4.44748	2.44351	9.2166	0.312758	1.81688	0.439702	9.01745	1.49667	0.269756	1.74548	0.0166614	0.212631	0.0634719	7.05601	0.023802	0.372897	0.944145	0.571247	0.15868	2.9662	3.48302	1.51571	9.24722	0.797049	4.086	0.258648	3.11393
COL8A1|1295	19.0632	92.5648	154.128	21.7799	94.614	549.592	187.446	100.75	41.0226	163.203	84.7283	14.1983	16.3708	20.8739	83.7494	19.7088	48.3739	50.3165	15.5156	19.7307	101.157	59.1354	24.2748	21.3482	55.1491	65.71	65.1222	19.1112	46.6288	31.7022	68.9617	39.6159	22.0921	150.918	8.00937	166.352	27.1472	28.7998	55.3962	25.4801	7.86651	123.423	232.869	174.046	12.1073	48.6928	19.9461	14.0141	56.8345
COLEC11|78989	9.87654	0.864198	1.91605	2.30453	0.668313	1.44033	1.00658	4.90453	13.4979	0.452675	0.90535	15.6568	1.35802	0.825514	1.27572	6.54321	1.69547	0.421399	9.34156	1.19342	2.31687	1.11111	0.576132	1.08395	5.77202	0.542387	2.18107	1.93416	0.172016	1.02881	3.4642	2.92181	3.04527	0.246914	2.34568	2.71605	4.93827	3.29218	7.57202	1.31687	1.76955	1.37119	3.55391	4.93086	0.955556	0.830453	0.781893	0.336626	2.7572
COMMD5|28991	36.0075	80.8508	122.717	70.1241	116.325	135.278	49.1851	120.702	241.384	146.81	78.1403	52.7424	144.623	41.3688	121.108	197.746	190.637	128.978	177.588	47.8373	130.421	83.3776	94.781	137.298	50.0346	89.4366	118.035	162.496	107.063	182.241	171.871	71.2115	104.52	71.9817	82.8251	92.8969	85.0529	294.228	138.838	77.699	226.349	110.222	124.193	126.045	145.906	79.1037	46.0583	104.155	191.334
COMP|1311	544.716	286.584	429.424	154.778	249.188	1527.91	1085.94	357.133	13.0194	243.029	134.783	52.0712	73.6289	61.4071	319.582	488.895	405.06	290.902	86.1376	197.794	772.218	218.556	92.5504	197.994	330.995	434.88	713.008	56.3383	277.281	15.3424	396.577	55.9191	92.3553	429.467	172.1	749.942	0.242817	151.207	115.796	53.3209	13.6584	454.964	832.669	326.321	12.5989	52.9292	21.7705	41.3096	200.767
COMTD1|118881	4.7845	42.5613	28.0673	16.4199	27.1491	20.9523	19.9625	47.7666	50.6482	27.3143	22.431	21.132	23.8697	12.6499	18.8492	67.3876	13.9532	32.6235	14.1908	34.8416	23.8194	70.655	54.6158	83.1014	24.8901	33.8697	18.7811	26.5153	37.8543	27.3373	7.29387	14.925	36.5511	13.9932	25.0213	15.3313	6.72913	47.7232	2.68313	15.644	22.7019	13.6269	44.2504	14.3382	18.1422	17.2998	6.85264	15.4404	34.5358
COPA|1314	170.398	298.536	742.151	281.412	193.892	464.382	356.449	399.606	414.904	980.037	397.314	854.824	449.49	441.445	162.424	263.089	498.941	271.169	776.721	472.568	361.009	434.095	303.505	386.833	185.605	868.895	161.835	592.459	346.856	555.202	408.417	354.246	419.217	393.136	263.931	342.434	231.464	211.126	537.705	562.953	335.669	746.058	526.961	436.975	261.505	648.78	222.412	957.937	258.41
COPB2|9276	195.482	370.818	614.406	225.378	273.915	684.524	457.333	327.213	364.485	748.598	415.722	1453.16	435.424	357.787	224.065	316.062	370.761	258.11	309.93	228.561	303.647	697.729	768.566	453.916	603.87	345.231	188.782	475.602	424.679	358.606	400.991	507.896	545.27	493.407	194.319	418.277	487.478	392.325	306.382	381.148	433.827	454.335	538.169	381.076	376.07	786.469	306.584	718.899	396.589
COPE|11316	229.961	316.492	582.926	359.263	380.76	446.706	342.575	565.049	629.16	794.211	397.612	522.132	707.595	379.549	274.013	2188.32	590.049	492.399	356.084	1833.45	577.117	664.886	914.749	894.312	286.939	342.882	470.822	861.752	759.183	466.302	484.52	364.4	582.973	264.773	1720.26	751.073	440.734	1331.81	873.601	315.155	300.438	459.758	699.031	446.036	886.138	670.677	214.193	682.168	680.949
COPG|22820	205.286	376.605	607.883	239.478	238.994	815.459	449.783	412.672	391.943	919.411	392.595	1292.92	479.25	399.294	227.658	514.894	506.011	371.986	347.253	495.421	396.398	798.083	1043.56	704.679	258.64	474.433	250.274	735.687	514.311	288.419	538.419	410.812	505.809	502.271	258.806	430.333	638.275	361.602	429.211	338.71	538.704	406.892	537.222	382.007	449.448	743.816	239.277	808.037	356.075
CORIN|10699	0.866001	7.87004	6.80187	3.46677	5.57889	65.8658	22.4663	5.48142	2.5774	21.3559	7.68698	1.7405	3.4536	2.29008	20.0561	4.96071	5.91357	5.42323	3.37354	4.49926	3.86154	19.1616	6.17944	5.16713	2.35039	4.36441	14.5944	4.598	12.0255	4.91463	2.59609	2.57167	2.76067	24.5621	2.15991	8.28456	0.598641	6.62327	2.35634	3.59248	1.03695	25.6284	11.3997	19.402	4.15141	4.21363	3.64196	2.21172	6.57507
CORO2A|7464	14.7255	65.2479	113.994	25.6631	33.6421	30.5862	49.4811	46.6179	135.795	49.0943	136.497	26.2208	40.7322	30.0342	30.5238	31.0675	18.9034	36.3123	58.7159	31.0677	53.7019	32.5685	90.4656	16.2151	23.2751	24.3772	14.2157	76.5655	71.9876	102.937	50.8365	115.517	156.668	68.4589	31.9307	12.4237	4.31621	69.3341	56.3674	120.523	112.016	89.7497	58.478	79.0718	47.6842	100.743	32.4618	66.8359	42.1879
CORO2B|10391	1.06619	7.401	8.68153	3.45749	2.78067	8.83273	8.33896	6.5342	10.7809	4.01412	3.41872	1.4262	1.86043	1.40238	2.29687	4.94295	4.40183	2.43174	1.8139	2.20161	3.01717	3.48685	2.41346	6.41457	11.2872	1.8848	5.45168	2.47438	3.46109	2.39546	5.35918	8.58045	1.95237	3.93104	1.34312	11.9759	1.0288	2.38023	2.94932	2.13237	4.03849	5.20964	9.15148	10.3265	2.56688	2.92495	9.37275	1.4046	2.31238
CORO7|79585	20.408	37.2138	57.8728	32.8514	41.9768	50.5049	37.0838	112.344	64.0612	75.2168	42.7199	94.1159	91.3416	20.9682	41.7015	45.2349	71.6859	53.5563	52.6933	23.8563	72.5135	28.5177	51.956	66.5248	44.6529	63.126	51.2122	98.1349	65.411	42.9554	93.4266	36.0976	41.0232	37.3284	47.7492	55.6211	27.5492	68.6456	58.181	46.8795	87.9813	63.6431	94.9584	43.2138	81.1144	36.8159	23.4917	56.5532	87.1859
COX6A1|1337	463.956	1260.84	1179.55	651.958	1227.22	1577.47	952.965	1469.38	3114.81	1621.92	1186.28	2597.22	1552.03	978.221	1016.8	2092.66	2174.64	2104.33	1724.61	6665.16	2089.49	1839.75	2754.35	4964.71	751.484	2067.4	1425.2	4793.44	2745.21	2868.55	2842.91	906.863	1735.34	1819.61	2138.8	976.595	1903.18	2557.05	2280.71	811.062	2739.32	1937.18	2006.7	2019.51	2360.64	2162.57	532.646	2378.63	3341.29
COX6C|1345	96.7096	3673.01	2735.52	619.129	1576.72	1815.6	138.49	1006.12	693.857	425.704	358.18	343.881	414.383	2273.61	891.512	509.452	854.219	7371.75	814.762	995.546	6694.05	284.786	3378.45	38865	695.033	321.337	1785.41	4703.53	1736.51	999.035	814.989	1311.66	1077.74	553.422	257.922	472.162	494.517	497.126	324.494	1221.86	1975.1	742.039	362.404	1357.41	1285.42	8786.15	206.982	3668.09	2574.75
COX7A1|1346	17.2095	26.9923	33.9783	22.2631	18.5275	52.5453	45.6654	45.9668	5.34355	35.645	12.3474	5.2235	21.4508	7.83014	23.7458	42.2043	32.3308	12.6782	11.7829	32.5006	34.3321	28.8851	173.594	34.3384	16.6705	14.4559	67.2261	21.3563	195.594	22.7037	45.8174	95.3691	5.91315	27.4151	32.7739	59.7216	4.78927	12.8212	24.5709	7.17369	19.5888	93.1264	67.023	58.6066	17.6398	12.3206	37.5019	6.57599	17.2388
CPA1|1357	0.1001	0.650651	1.001	0.700701	0	0.003003	0	1.8018	0.015015	0.1001	0	0.1001	0.1001	0.1001	0	0.222222	0.0500501	0.017017	0.145145	0	0.700701	0	0.102102	0.950951	0.2002	0	0.45045	0.014014	0	0	1.14615	0.45045	0.1001	0.15015	0	1.44745	0	0.950951	0.1001	0.1001	0.3003	0.382382	2.83884	0.600601	0.107107	0.01001	1.85185	0.1001	0.3003
CPA2|1358	0.042517	0.085034	0.085034	0.340136	0	0.255102	0	0.722789	0.595238	0.170068	0	0.382653	7.02466	0.170068	0.042517	0.672619	0.977891	0.00595238	1.84439	1.06293	0.356293	0.00595238	0.085034	0	0.170068	0.170068	0.085034	0	0	0.085034	0.477041	0.170068	0.085034	0	0.0688776	0.443878	0.085034	0	0.595238	0	0.510204	0.340136	1.36139	0.170068	0.170068	0.267007	0.170068	0.042517	0.510204
CPAMD8|27151	79.1457	5.07803	29.3732	17.2194	127.1	6.93259	2.89013	26.8887	11.0671	17.177	5.65749	49.7444	1.85972	4.00832	26.8901	45.4429	8.72404	1.97762	43.1096	19.0476	5.17384	10.115	4.44808	100.879	27.5981	10.8285	21.6509	8.73121	2.2926	4.4082	51.0238	10.08	64.8348	10.8761	58.9128	30.1882	10.1403	3.35743	39.3044	5.29231	2.81641	3.6004	40.93	17.144	7.00029	11.5324	43.0152	1.70052	7.56856
CPEB1|64506	0.570885	1.6248	2.56708	1.11005	1.1719	4.06946	2.01681	2.47098	27.8709	4.31684	1.25278	0.682525	4.6673	0.192832	3.62004	1.4843	0.830637	0.749128	0.763083	0.750714	0.846178	2.96448	0.629559	1.62956	1.72851	0.356486	2.41009	0.965113	1.74437	1.5065	1.63749	4.25278	0.859182	1.2994	0.570885	3.79004	0.792896	4.9334	0.956549	0.856327	0.430701	1.69775	3.04155	2.82049	1.15002	1.8725	4.13543	0.298129	1.02728
CPE|1363	264.1	267.014	360.657	200.158	187.887	483.645	268.612	773.92	107.769	951.401	53.6805	65.0776	98.889	1021.86	180.08	77.524	101.409	131.999	73.0622	60.2211	83.5366	279.109	490.237	233.406	340.274	39.222	208.458	95.8882	267.227	116.267	263.845	292.939	48.3931	126.87	183.153	281.38	20.152	62.8057	67.302	77.2846	125.885	129.627	236.021	455.3	53.8346	3064	233.517	115.946	115.968
CPM|1368	21.6602	18.6086	14.7832	14.9108	11.8292	18.0121	7.83581	77.9243	12.2662	183.671	55.4372	11.8042	63.5437	12.5457	10.4801	20.9847	38.9049	7.39646	150.863	25.3651	25.2207	13.7784	31.8195	29.1853	16.1783	25.4065	11.5974	20.7947	7.41191	10.7149	28.8866	7.73534	12.4401	15.3966	8.59739	41.1107	10.7469	9.64552	49.9537	11.4381	16.2056	13.3911	54.7391	17.0996	27.2819	14.6554	34.1517	18.4557	77.7623
CPNE7|27132	3.38603	1.30757	6.01913	14.3747	3.88056	1.42467	2.65105	2.12724	11.886	12.4789	9.81655	44.6432	24.5496	0.920765	9.5121	2.21741	9.89969	18.5273	13.6378	14.0566	8.27127	1.78181	17.6495	7.15183	3.25917	2.82475	5.50273	20.8173	4.24317	18.8716	4.48634	8.34738	33.4832	14.2073	63.0898	2.79938	14.6257	4.68735	2.121	19.5531	3.68579	6.22326	7.07845	11.8528	4.89266	0.700625	0.331772	49.3009	1.22951
CPS1|1373	6.9796	3.84481	6.80209	1.62127	1.62476	5.31822	3.00785	2.434	0.65388	3.56582	2.06626	1.09852	18.2113	0.70619	2.0837	3.26417	2.30166	1.48248	1.59564	1.58675	1.36879	1.68265	0.736879	1.96495	3.02528	0.941587	1.4884	1.49085	7.75937	2.90323	1.08858	2.79686	0.601569	2.87707	0.413078	5.50131	0.191805	0.533915	1.32799	0.889276	0.985179	2.45493	3.35833	6.22511	8.89241	2.14874	6.65214	1.59163	1.22929
CPXM2|119587	10.5858	79.5279	37.6071	39.8087	33.0711	17.1731	45.3175	93.5664	11.2849	22.0254	9.71572	9.75266	21.5823	19.4443	24.8785	39.1503	38.1735	16.4781	62.2755	64.2943	30.9649	35.1021	38.0708	36.1634	47.2041	20.3751	41.5194	21.0708	74.9352	10.9922	77.1083	45.8278	9.99186	50.2426	10.0585	33.4756	1.40889	16.7411	20.3178	17.9289	14.0122	28.7502	80.7996	139.386	20.3907	62.1384	81.7345	10.9036	99.4869
CR1L|1379	0	0.244965	0.0816549	0.299401	0.353838	0.0272183	0.190528	0.108873	0.244965	0.108873	0.136091	0.740882	4.61894	0.108873	0.108873	0.39902	1.1497	0.0016331	0.63092	0	0.517148	0.16331	0.489929	0.767011	1.37452	0.870985	0.299401	0.544366	0.925422	0.0544366	0.136091	0.571584	0.396298	0.272183	0.108873	0.353838	1.6331	0.217746	0.507893	0.0544366	0.0544366	0.244965	1.52422	0.332608	0.517148	0.194883	0.108873	0.353838	0
CRABP1|1381	38.9079	7.60742	208.913	3.96419	1.79028	17.3862	48.3913	1.72379	173.27	189.133	2.66624	5.02302	82.6522	1.33887	3.42711	297.427	19.5818	1.79028	10364.6	1451.77	0.511509	0.767263	5.81586	6.95141	8.58824	719.51	23.0972	0.634271	28.9258	1.27877	72.8593	13.1957	9.90793	14.5345	25.7199	51.7532	68.9015	3.63683	37.8491	4.73146	0.703325	0.383632	1.68798	23.1368	14.7276	514.671	12.7877	0	1.53197
CRABP2|1382	1252.68	4214.74	5863.05	2779.03	1172.42	1326.34	1113.95	5790.75	565.152	3481.89	1318.53	18.4541	335.871	295.944	572.953	5199.13	3821.46	1610.18	812.032	100.383	4761.05	1720.75	81.3199	15088	1176.72	261.29	452.876	10189.4	2385.18	4356.24	5858.4	491.657	7654.15	2246.43	297.349	1041.78	236.161	112.635	1075.16	195.507	5215.53	942.374	5111.03	3807.79	2175.46	3523.66	346.601	3522.85	4465.59
CRB2|286204	0.0668817	1.15484	1.92925	1.08366	0.331828	1.54452	0.141935	1.69871	0.376559	0.333333	0.225806	0.206667	0.107527	0.307742	0.348602	0.105591	0.947527	0.139785	1.45677	0.16129	0.371613	0.408602	0.165376	0.372258	0.494624	0.0374194	0.982151	1.31634	0.107527	0.0860215	0.416774	0.945161	0.0933333	0.139785	0.291398	1.41828	0.0860215	0.351613	0.365161	0.376344	0.268817	0.284946	0.580215	1.9486	0.519355	0.209677	0.800215	0.625161	0.396989
CRB3|92359	20.0805	35.8229	99.3077	50.9445	64.3363	72.9222	49.8542	64.0823	70.4383	122.501	61.5519	124.673	56.4714	65.9061	33.5868	62.5054	26.9302	54.9517	76.8193	64.788	54.9884	150.162	81.0572	88.8721	25.8819	17.517	41.9499	86.3828	88.034	134.345	71.8891	62.0662	47.6252	28.22	138.966	43.9544	25.5814	111.225	29.9866	42.0841	24.271	64.1852	60.2844	57.6628	80.0877	119.742	37.0036	92.7782	134.101
CREB3L1|90993	8.14002	138.99	109.153	145.614	40.3653	1025.78	291.321	59.6868	20.6263	2424.97	260.076	12.7425	38.0269	594.009	115.91	65.5892	54.4894	97.4095	29.3494	55.3679	146.786	719.254	957.11	255.561	45.4642	53.481	209.185	237.094	451.547	29.9885	39.7147	134.397	350.601	82.9351	280.042	204.655	10.5274	204.913	55.3741	84.4329	211.283	206.188	486.834	96.1913	94.8087	356.255	52.7102	599.906	131.973
CREB3L4|148327	148.502	375.242	603.473	456.651	297.641	287.662	453.598	147.213	151.102	3000.09	330.985	1159.68	56.9463	811.41	314.373	111.07	143.07	375.105	120.822	63.9112	370.613	148.733	1782.68	413.16	79.0814	120.254	187.453	692.512	336.509	532.695	149.943	372.593	281.609	485.099	127.917	261.863	42.4429	658.955	67.2067	881.647	203.453	654.459	411.155	704.067	231.909	343.21	196.279	368.064	184.63
CREB5|9586	20.3615	3.20066	3.01661	1.28236	1.28249	7.27956	2.46251	2.07218	0.882633	6.30813	1.54958	0.897655	3.07902	0.909868	1.72814	2.70811	2.52931	0.98852	8.57902	2.27357	1.66817	2.1617	2.14949	3.95811	9.26295	2.90669	2.94944	2.33146	1.45335	1.56326	1.37335	4.89619	8.59795	0.952614	2.79067	5.17257	2.81876	2.09648	9.50721	4.36615	1.5022	1.8797	7.44321	4.49621	3.94846	2.49231	8.21324	1.77284	3.53566
CRELD2|79174	47.3868	61.2249	157.936	82.6485	47.9562	130.52	117.424	123.508	47.256	327.496	105.919	80.017	119.309	83.2185	48.4724	171.749	261.337	62.7298	138.89	142.6	64.0948	147.791	198.71	111.491	55.8062	163.909	70.4604	293.949	97.7525	102.458	66.7857	58.8197	93.0113	144.454	395.106	117.802	73.1711	252.316	186.913	86.7843	71.8678	105.045	98.2496	129.126	192.004	159.012	62.0835	117.068	67.3154
CRHBP|1393	0.845166	2.3881	0.878972	1.11562	0.473293	0.463151	0.541582	0.811359	0.135227	0.880325	0.584178	0.169033	0.849899	1.37323	0.676133	0.40568	0.777552	0.436105	0.338066	0.270453	1.65652	0.20284	0.676133	2.87289	2.26504	0.40568	0.811359	0.40568	0.0676133	1.65652	1.72414	1.71941	0.878972	0.981744	0.0676133	2.40636	0	0.0676133	0.0743746	0.270453	1.85193	0.743746	5.74713	0.643002	0.473293	0.565923	0.709939	1.38607	0.40568
CRHR2|1395	0.0359395	0.0315259	0.0416141	0.523329	0.0334174	0.147541	0.1343	0.157629	3.20113	0.630517	0.0699874	0.479193	0.0605296	0.126103	0.126103	0.25662	0.122951	0.137453	0.0126103	0.662043	0.157629	0.0945776	0.102144	0.189155	0.283733	0.157629	0	0.191047	0.189155	0.0630517	0.35372	0.315259	0	0	0.220681	0.726356	0.220681	0.00945776	0.0315259	0	0	0.392182	0.472888	0.220681	0.194199	0.11034	0.37831	0.285624	0.441362
CRIM1|51232	129.14	145.625	159.528	85.8538	64.2417	113.804	65.7791	131.798	55.1494	72.9895	65.5183	15.5595	146.229	225.073	76.0809	34.804	53.2485	47.8429	72.6169	32.7681	74.354	45.4776	21.15	68.1219	47.5351	51.8577	61.2941	112.057	95.1441	24.6124	282.928	131.686	82.1805	56.7504	39.3224	115.364	63.3033	17.6104	46.2887	111.257	70.6447	280.499	231.832	222.935	32.1678	232.433	348.321	17.3319	86.8527
CRIP1|1396	36.0583	2860.59	3123.01	1431.89	1871.11	644.3	2526.68	2549.99	142.598	9517.85	1134.04	46.4625	361.227	90.4062	1724.71	463.325	756.296	3692.32	491.317	121.006	3899.1	129.363	2065.5	9142.4	1083.58	629.369	4970.15	7430.61	8945.9	2545.8	2579.73	2219.22	3609.84	971.667	3117.85	656.523	269.754	82.5729	290.95	4029.09	4953.88	3126.49	673.625	5908.51	3811.88	4822.45	358.606	646.204	3721.85
CRISP3|10321	0	0.822368	20.9497	0.657895	16.961	1.01034	269.477	1.03383	0.93985	1.52726	2.09117	3.0531	0.0469925	10.4027	7.9718	33.5832	4.4563	0.681391	0.093985	0.56391	0.469925	18.3026	358.688	13.8872	0	0	213.833	2.48308	0.299812	0.234962	3.28947	48.226	0.0469925	0	0.822368	3.06438	0	0.822368	0	3.25658	2.06767	0.258459	0.258459	0.861372	1.43327	1.55075	3.02491	0.281955	1.63957
CRISPLD1|83690	120.235	37.4399	59.7678	17.7094	6.42861	79.8167	32.6106	24.6608	30.4838	38.0034	9.95609	134.656	61.7365	3.52196	48.0702	41.5619	16.8378	7.08835	449.453	39.3027	6.08467	4.19406	15.6287	25.6463	6.13516	29.5322	16.7289	2.19353	9.96082	11.0281	3053.43	34.1054	2.40363	5.03287	2.34236	37.8138	8.68341	1.76177	11.6229	2.64817	2.03655	12.3034	16.4665	29.6592	7.3087	29.989	85.4844	1.11754	399.16
CRTAC1|55118	33.2829	10.3266	13.1099	3.94969	1.36805	0.794351	0.761695	3.2436	104.061	0.382171	2.1902	96.2613	4.17167	3.79523	1.54457	1.17785	5.01236	0.37511	18.1818	16.0194	1.86055	0.661959	3.31421	1.45896	1.63283	0.242718	3.70697	2.4316	1.80936	7.43601	18.1178	5.31553	0.772286	2.53751	0.882613	8.9338	1.19153	71.0459	5.18535	3.2436	0.0882613	1.57679	1.27979	5.91748	16.9064	7.52824	2.78023	0.661959	0.977935
CRY2|1408	55.5838	48.5703	119.52	40.8028	46.3195	80.9623	64.6423	77.7741	45.4385	81.4123	35.1222	84.5213	29.2019	30.5794	39.8315	24.4667	45.8192	31.2055	33.3895	36.001	64.8525	51.5341	65.2521	77.0463	61.2874	27.4027	53.1499	83.1661	46.7161	90.6683	127.942	82.8136	40.2888	20.7643	29.6727	73.6188	12.3288	59.5245	37.3199	70.632	63.7352	134.198	83.7927	112.4	31.636	151.37	62.9625	59.4152	53.9897
CRYAB|1410	861.232	264.59	298.203	124.476	76.7531	136.597	46.8766	465.819	41.687	42.4214	31.7606	51.8616	212.049	22.3791	39.48	1458.75	288.766	91.5499	773.404	244.596	128.652	35.0661	43.1534	181.574	44.384	932.515	255.142	48.8092	82.2606	38.5449	196.387	194.141	21.7506	47.3055	13.3167	442.165	1497.42	68.6658	2391.54	31.7319	96.3915	92.8915	337.862	402.001	20.5923	32.0773	523.337	41.0848	49.3978
CRYBG3|131544	18.6237	22.3502	22.2359	24.0621	29.8299	22.4004	12.4681	19.4936	6.17773	24.5253	14.3971	16.3109	30.0291	6.88801	11.2273	15.2078	27.7929	5.59002	11.9438	9.59696	9.89395	14.892	10.931	38.4014	19.6135	30.032	11.5699	5.46085	5.28576	6.90287	19.1136	18.4139	5.36042	8.49884	8.18335	23.5246	14.2015	3.80608	11.8672	14.036	8.2078	10.9907	40.1463	25.0109	11.7621	14.3849	45.1364	18.561	16.365
CSAG2|728461	0	0.256739	0	0.385109	0	0.0115533	0.0770218	0.453145	0.0641849	0	0.12837	28.4339	0.320924	0	0.12837	1.79718	0.834403	0	1.10655	0.12837	3.59435	0	1.92555	0.192555	3.72786	0.834403	0	0.385109	0.770218	0.0641849	0	0.12837	1.54044	0.0641849	0.385109	0.141207	0.385109	0.256739	62.5469	0.0641849	1.21951	0.27086	0.320924	0.12837	2.56739	0.012837	0.0641849	1.09114	1.86136
CSDAP1|440359	1.53299	0.142207	0.739477	0.535836	0.711035	0.537543	0.331627	1.24801	2.26678	0.426621	0.312856	1.90557	8.71843	0.142207	0.483504	2.1752	1.67349	0.255973	2.376	1.99033	0.426621	0.369738	1.04664	0.759386	0.0568828	1.81399	0.564278	1.49431	0.483504	0.851536	0.481797	0.879408	0.227531	0.312856	2.78271	0.761661	1.53527	0	1.07679	0.483504	0.227531	0.82992	1.69056	1.59556	0.65529	0.89306	0.879408	0.0568828	0.821388
CSE1L|1434	125.239	243.614	307.914	151.036	146.294	202.352	228.204	564.762	733.693	221.42	212.315	481.97	506.432	253.921	105.968	133.384	216.574	308.391	509.368	325.519	198.28	240.756	327.864	328.196	323.293	429.501	100.812	207.023	283.969	397.819	354.52	261.165	1308.43	267.559	223.701	114.003	735.811	292.261	627.723	244.419	305.093	326.622	198.645	245.071	281.24	370.409	127.033	494.109	302.987
[truncated: 3,275 more rows]
[truncated: 401 more columns]
