# Supplementary material for: NFIB promotes the migration and progression of kidney renal clear cell carcinoma by regulating PINK1 transcription
Source: PeerJ. 2021 Apr 23;9:e10848. doi: 10.7717/peerj.10848 (PMC8074839; doi:10.7717/peerj.10848)
Supplement: Supplemental Information 2 [file peerj-09-10848-s002.xlsx]

## Sheet: GSM2225057_PRPTEC_shESRP2_1.hts
ID_REF	GSM2225057	GSM2225058	GSM2225059	GSM2225060	GSM2225061	GSM2225062	GSM2225063	GSM2225064	GSM2225065	GSM2225066	GSM2225067	GSM2225068
ENSG00000000003.10	2433	1801	1689	1285	556	562	1340	1033	408	454	463	514
ENSG00000000005.5	0	0	0	0	2	0	0	0	0	0	0	0
ENSG00000000419.8	1810	1436	1593	1383	1663	973	1901	1940	3041	1920	1735	1725
ENSG00000000457.9	739	484	681	450	425	471	650	723	500	707	523	695
ENSG00000000460.12	231	138	182	150	125	430	925	311	213	496	283	422
ENSG00000000938.8	2	0	0	1	0	0	1	0	2	0	0	5
ENSG00000000971.11	11843	12518	15588	10180	3302	2645	5982	5903	7794	3558	6556	12427
ENSG00000001036.9	3658	3427	4210	2498	1952	2090	3610	2242	4020	2916	2497	3074
ENSG00000001084.6	2264	1800	1753	1547	1010	1402	2262	3736	1079	1565	742	807
ENSG00000001167.10	768	791	1204	645	355	494	738	685	1696	1109	871	926
ENSG00000001460.13	359	362	515	382	372	601	459	715	777	1943	658	657
ENSG00000001461.12	6350	4307	7179	4642	1997	2990	2756	2098	1640	3873	3752	3345
ENSG00000001497.12	1608	1222	1748	1123	1287	1762	3258	1715	1459	1502	908	1223
ENSG00000001561.6	908	228	918	286	123	54	183	106	109	101	123	24
ENSG00000001617.7	767	737	1683	833	1196	1103	1824	1877	631	650	778	826
ENSG00000001626.10	62	34	425	60	6	1	2	2	7	0	0	0
ENSG00000001629.5	7067	4321	5059	4025	4392	4402	7585	6294	10152	9727	9852	9715
ENSG00000001630.11	485	401	614	431	552	222	422	328	703	323	408	301
ENSG00000001631.10	1788	1112	1450	995	1785	2311	2914	2474	2828	2842	2377	2802
ENSG00000002016.12	537	409	618	353	178	206	334	466	333	371	488	517
ENSG00000002079.8	30	7	77	19	95	34	30	6	86	116	96	51
ENSG00000002330.9	1491	1749	2006	1320	456	503	618	660	1251	1125	1134	1467
ENSG00000002549.8	2326	2211	3261	2157	1618	1472	5148	2200	3342	2052	2048	2616
ENSG00000002586.13	7190	5716	3527	4886	1104	1421	2441	2520	3232	8949	10349	10613
ENSG00000002587.5	125	41	152	67	35	47	47	25	23	18	14	76
ENSG00000002726.15	0	0	2	0	3	1	1	1	2	0	1	0
ENSG00000002745.8	2	2	5	0	0	0	0	0	0	0	0	0
ENSG00000002746.10	55	82	21	39	520	666	1026	566	620	297	640	733
ENSG00000002822.11	1150	970	1191	851	372	450	855	508	926	765	830	895
ENSG00000002834.13	19864	12505	18601	15505	6903	7543	12474	6906	10001	5446	9717	8688
ENSG00000002919.10	1096	918	1098	706	630	579	770	912	1216	1127	587	638
ENSG00000002933.3	0	0	0	0	0	0	0	0	0	0	0	0
ENSG00000003056.3	4695	3266	4915	2941	3223	3783	5046	4427	3099	3818	3059	3425
ENSG00000003096.9	1279	1304	3338	916	1264	1950	3302	1123	203	162	190	300
ENSG00000003137.4	89	74	12	69	806	723	1399	1282	5	5	35	14
ENSG00000003147.13	432	411	600	442	36	25	42	73	232	228	241	71
ENSG00000003249.9	1080	935	1826	891	148	122	283	352	421	345	370	437
ENSG00000003393.10	3031	3566	6042	3121	3005	2769	4319	2643	5423	4191	2711	3493
ENSG00000003400.10	557	461	511	381	865	586	846	1108	566	401	1009	1071
ENSG00000003402.15	9462	6087	17262	6608	9245	6586	11519	14771	11857	9079	11265	10520
ENSG00000003436.10	12272	4736	7832	5329	6818	11171	18125	30232	5521	5813	3972	5139
ENSG00000003509.11	1066	770	1425	710	391	573	844	406	591	613	791	799
ENSG00000003756.12	5510	3400	5404	3156	1693	1597	3339	2947	3057	2422	3351	3793
ENSG00000003987.9	6	2	6	5	4	0	3	0	0	1	24	5
ENSG00000003989.12	1135	1604	2074	1728	72	31	116	76	606	1844	5198	11016
ENSG00000004059.6	2514	2292	2693	1805	1867	1591	2628	2924	4758	4017	3790	4745
ENSG00000004139.9	396	449	387	405	193	61	154	243	208	91	239	194
ENSG00000004142.7	3843	3010	4171	3046	3558	2668	4557	6099	4393	3311	2423	2818
ENSG00000004399.8	4021	3054	1462	2739	2966	4394	6535	6643	1007	1268	1103	918
ENSG00000004455.12	4105	3267	4844	3496	1905	2354	3937	4015	7358	8307	5552	6519
ENSG00000004468.8	1	3	164	0	1	5	3	2	0	0	3	6
ENSG00000004478.5	3695	2794	3904	2755	1938	2061	3859	1700	5854	3112	2387	3488
ENSG00000004487.11	5207	2838	3917	3380	2093	1406	2602	955	8081	4269	4491	5772
ENSG00000004534.10	3401	2496	3465	2016	997	841	1830	1358	2535	2412	1897	2114
ENSG00000004660.10	293	259	696	184	255	211	574	1351	1468	1119	1972	2270
ENSG00000004700.11	5725	2536	4090	3055	2018	3764	4164	1364	2736	4653	2268	3212
ENSG00000004766.11	1929	1294	2198	1186	811	1322	1891	1842	2204	1828	1322	1551
ENSG00000004776.7	25	99	2	52	0	2	3	0	6	1	2	0
ENSG00000004777.14	7	13	12	11	31	27	61	79	164	124	265	237
ENSG00000004779.5	1665	1485	1367	1366	720	1286	1607	1904	832	1723	1282	1643
ENSG00000004799.7	71	45	217	31	71	44	61	64	88	49	156	125
ENSG00000004809.9	0	1	3	2	0	1	0	0	1	0	0	3
ENSG00000004838.9	21	4	20	10	35	13	11	12	22	34	56	36
ENSG00000004846.12	26	16	51	18	1	4	3	3	10	5	6	5
ENSG00000004848.6	0	0	0	2	0	0	0	0	0	0	0	1
ENSG00000004864.9	1142	1063	2168	736	1976	3236	4046	3337	3252	3622	1599	2728
ENSG00000004866.14	797	930	671	817	360	515	900	578	765	620	550	690
ENSG00000004897.7	8267	3913	7862	4477	3079	2026	6458	5645	6979	2441	3328	4059
ENSG00000004939.9	0	0	0	0	3	0	0	0	0	0	0	0
ENSG00000004948.9	0	0	0	0	29	30	16	22	4	6	2	0
ENSG00000004961.10	881	1099	1381	938	522	438	770	824	1450	833	498	662
ENSG00000004975.7	1678	1001	1404	1116	918	823	1734	2690	1935	1444	1977	1593
ENSG00000005001.5	2	0	1	2	0	1	0	0	2	0	0	0
ENSG00000005007.8	4192	2556	3681	2458	1524	1326	2374	2758	3172	1789	2181	2705
ENSG00000005020.8	3180	2118	3653	1718	1052	4095	5967	5904	1500	4985	4532	5986
ENSG00000005022.5	5353	2269	6792	4144	5174	9924	14832	7643	4962	5965	2687	3402
ENSG00000005059.11	676	363	934	431	181	402	637	277	612	931	1091	1284
ENSG00000005073.5	382	305	429	221	1290	793	1373	344	396	216	210	189
ENSG00000005075.11	1120	1117	901	893	1318	1000	1479	1322	2169	1888	1536	1809
ENSG00000005100.8	1429	856	1191	927	407	619	984	745	854	1064	577	595
ENSG00000005102.8	3	10	0	4	0	0	0	0	3	0	0	0
ENSG00000005108.11	143	68	155	70	4	1	6	1	35	4	3	5
ENSG00000005156.7	989	868	923	692	315	425	936	1213	1535	1780	1618	1559
ENSG00000005175.5	1720	988	1653	1044	712	510	1123	661	1323	764	719	825
ENSG00000005187.7	88	40	172	70	215	91	363	379	636	248	1261	1639
ENSG00000005189.15	70	76	80	45	100	191	407	271	138	285	725	763
ENSG00000005194.10	2734	2594	3122	2049	1759	1554	1912	2745	2873	2127	952	1361
ENSG00000005206.12	1095	911	694	777	451	388	500	873	1462	1649	1346	1768
ENSG00000005238.15	2134	1330	3120	1987	2946	2749	2594	2970	2332	1598	1378	1482
ENSG00000005243.5	1874	1460	872	1689	494	603	1146	1351	553	869	1065	1456
ENSG00000005249.8	46	43	240	25	103	92	318	111	107	62	84	44
ENSG00000005302.13	1373	1157	1916	1138	463	331	893	488	649	499	515	608
ENSG00000005339.8	1702	1500	1642	1144	1096	920	1858	3064	1455	1372	1349	1642
ENSG00000005379.11	2	0	0	0	0	0	0	0	3	0	4	5
ENSG00000005381.6	1	1	9	1	0	0	0	0	1	0	0	0
ENSG00000005421.4	0	0	5	0	0	1	1	2	0	0	0	0
ENSG00000005436.9	691	466	887	442	447	584	1076	945	620	728	497	787
ENSG00000005448.12	759	639	1348	682	220	229	359	358	443	890	609	1033
ENSG00000005469.7	442	1136	1681	828	1126	689	1391	522	1307	444	566	705
ENSG00000005471.11	263	214	843	223	481	80	294	218	6	0	6	4
ENSG00000005483.15	1477	1141	2096	925	1414	882	2032	2294	2271	1775	2633	3330
ENSG00000005486.12	1379	1474	1897	1176	2284	907	1616	1528	4788	1897	1008	1823
ENSG00000005513.9	28	5	24	4	1	0	0	0	0	0	0	0
ENSG00000005700.10	6663	3598	7166	3813	3872	2214	6968	7061	7866	4387	6349	7164
ENSG00000005801.12	1340	1016	1267	723	665	897	1677	1401	976	739	456	572
ENSG00000005810.13	6082	5088	5976	4188	1684	1735	3703	2868	2828	2739	2696	2578
ENSG00000005812.6	3527	1266	3363	1514	610	809	1432	1517	1521	1730	1192	1301
ENSG00000005844.13	1	0	0	1	3	1	3	0	1	0	1	0
ENSG00000005882.7	748	755	600	578	277	158	426	351	1002	539	772	911
ENSG00000005884.13	61007	24963	103943	41767	23599	32290	50478	71295	31147	69195	47376	38576
ENSG00000005889.11	5193	3580	5629	2964	1761	2015	3890	2391	1878	1535	1246	1498
ENSG00000005893.11	7443	5745	9068	5483	14562	9496	20025	8092	13663	8119	8099	10673
ENSG00000005955.8	3894	2698	4765	2533	1690	1289	2936	4066	3365	2632	3038	2987
ENSG00000005961.13	4	0	2	5	3	1	11	25	12	12	99	50
ENSG00000005981.8	2	0	0	0	2	0	0	0	0	3	4	6
ENSG00000006007.7	4644	4133	6314	3738	4357	3289	4209	3754	4105	3116	1954	2905
ENSG00000006015.13	776	898	829	702	503	324	497	517	645	653	557	567
ENSG00000006016.6	79	66	3	52	11	8	36	66	7	0	0	1
ENSG00000006025.7	432	378	545	325	365	280	482	356	633	511	603	531
ENSG00000006042.7	6123	4725	6126	3718	19	2	12	44	310	21	91	73
ENSG00000006047.8	4	0	13	1	0	2	4	3	1	0	17	12
ENSG00000006059.3	0	0	0	0	0	0	0	0	1	0	0	0
ENSG00000006062.9	412	366	457	292	1567	1047	2187	4713	1521	1250	1715	1604
ENSG00000006071.7	0	0	0	0	0	0	2	1	0	3	0	0
ENSG00000006074.4	0	0	0	0	0	0	0	0	0	0	0	0
ENSG00000006075.11	0	0	0	0	5	5	3	0	0	0	0	0
ENSG00000006114.11	2515	1748	2546	1489	968	864	1475	1930	1462	1227	1314	1309
ENSG00000006116.3	0	0	0	0	0	0	0	0	0	0	0	0
ENSG00000006118.10	3546	3710	7359	2789	4284	1198	1939	1097	7585	3470	3380	2977
ENSG00000006125.12	12844	8709	13009	8673	7489	8428	17542	16935	14916	9065	9652	9651
ENSG00000006128.7	1	1	3	3	27	97	123	483	0	0	1	1
ENSG00000006194.6	1866	1360	2059	1300	1516	1287	2234	2584	2156	1857	1727	1967
ENSG00000006210.6	102	66	371	70	22	7	24	222	204	121	141	322
ENSG00000006282.15	4321	3314	6530	3290	1305	1596	2788	4433	2748	3646	4980	4092
ENSG00000006283.13	4	2	8	3	51	15	60	58	38	5	8	3
ENSG00000006327.9	6025	6053	8192	5388	8085	5290	8228	19625	12241	12155	5110	8480
ENSG00000006377.9	2	3	0	1	4	3	8	0	0	0	0	0
ENSG00000006432.11	600	673	2533	729	990	1454	2073	3456	1821	2590	2121	1563
ENSG00000006451.3	3040	1737	2873	1866	1448	1512	2466	2926	3099	2696	2914	2590
ENSG00000006453.9	1594	1286	2754	1233	2421	2979	5502	5977	2982	4359	5704	5296
ENSG00000006459.6	1226	636	900	597	811	377	1084	1212	1481	3135	2357	1764
ENSG00000006468.9	1211	587	769	451	365	489	1155	235	387	434	450	346
ENSG00000006530.11	1211	926	947	811	507	1198	1708	1848	966	1918	1443	1890
ENSG00000006534.11	846	630	1362	713	817	1314	1725	2589	2643	2124	2631	2950
ENSG00000006555.6	34	20	86	33	0	0	0	0	0	0	0	0
ENSG00000006576.12	4076	2155	737	1772	920	530	2128	741	2726	806	2547	2814
ENSG00000006606.4	43	44	24	48	173	420	596	239	11	21	15	12
ENSG00000006607.9	2915	2240	3096	1820	1009	1039	1509	899	4243	2780	1839	2477
ENSG00000006611.11	0	1	0	1	26	13	62	22	45	26	276	297
ENSG00000006625.13	354	718	753	703	502	554	1673	839	896	573	824	982
ENSG00000006634.3	506	244	461	257	551	1068	2851	789	1135	1260	1273	1493
ENSG00000006638.7	114	188	61	163	211	80	179	148	22	21	58	19
ENSG00000006652.9	4098	2848	2924	2951	3521	3118	8468	15821	6964	4854	4767	4234
ENSG00000006659.8	0	0	0	0	0	0	0	0	0	0	0	0
ENSG00000006695.6	392	505	739	441	304	484	769	842	699	1014	732	704
ENSG00000006704.6	1108	1155	2364	993	1466	1229	2835	3899	4056	3275	4861	4420
ENSG00000006712.10	2849	1841	2745	1793	1358	959	1911	1878	2308	1204	1332	1392
ENSG00000006715.11	7132	5195	7004	4659	3763	4572	5978	5884	5276	3629	4061	3772
ENSG00000006740.12	202	146	107	128	21	35	77	108	3	0	4	7
ENSG00000006744.14	3683	2935	4734	2949	1560	2308	3658	2515	2808	2552	1590	1767
ENSG00000006747.10	294	233	453	267	30	22	53	51	6	4	13	5
ENSG00000006756.11	2660	1588	4548	1593	2038	716	1979	2091	5303	1986	2698	3183
ENSG00000006757.7	488	546	752	530	44	38	60	159	770	675	354	494
ENSG00000006788.8	0	0	3	0	0	1	0	0	9	15	174	389
ENSG00000006831.9	3010	1772	3126	1735	2216	1452	3289	2002	4964	2785	3345	4086
ENSG00000006837.7	57	16	25	18	66	33	49	74	60	38	55	46
ENSG00000007001.8	1	1	0	0	0	8	5	5	0	0	2	0
ENSG00000007038.6	0	4	8	3	0	0	0	0	0	0	0	0
ENSG00000007047.10	1320	1025	1269	884	490	378	622	682	1448	871	1022	981
ENSG00000007062.7	1252	697	739	663	2	3	5	7	8	12	18	13
ENSG00000007080.6	1192	1208	1103	1128	937	640	847	988	2449	1505	1068	1369
ENSG00000007129.13	0	0	0	0	2	0	2	1	0	0	0	0
ENSG00000007168.8	9481	6417	11729	6433	3972	3772	6925	9261	7781	6237	4723	5660
ENSG00000007171.12	4	1	0	0	0	3	5	6	1	0	6	5
ENSG00000007174.13	3	0	1	0	3	0	1	2	0	0	0	0
ENSG00000007202.10	16582	10572	22360	12645	6733	8348	10320	8042	14152	9414	3706	4829
ENSG00000007216.10	1	0	2	0	0	0	0	0	1	0	0	0
ENSG00000007237.14	683	478	1310	506	16	25	44	51	1	0	0	1
ENSG00000007255.6	226	271	305	180	169	141	283	375	708	612	1006	880
ENSG00000007264.9	52	52	70	55	51	28	43	160	10	1	11	3
ENSG00000007306.10	0	0	0	0	0	0	0	0	0	0	0	0
ENSG00000007312.8	0	1	0	0	19	1	4	2	4	0	3	6
ENSG00000007314.7	1	1	0	1	13	0	57	54	6	3	0	2
ENSG00000007341.14	1615	1153	1092	1077	326	302	460	666	883	779	688	929
ENSG00000007350.12	0	0	1	1	3	0	3	3	10	5	6	1
ENSG00000007372.16	6	9	1	3	0	0	0	0	289	370	393	638
ENSG00000007376.3	1149	1020	1325	823	1199	1131	1590	678	1180	793	391	479
ENSG00000007384.11	3205	2278	2427	1966	1387	747	1136	1237	1697	1570	928	1210
ENSG00000007392.12	1717	1260	1614	1191	585	477	773	683	1080	737	599	712
ENSG00000007402.7	12	8	8	1	1	1	0	1	0	0	5	2
ENSG00000007516.9	53	42	141	46	3	2	7	23	50	33	110	132
ENSG00000007520.3	1762	1308	1659	1392	1394	893	1448	1416	1932	1498	1477	1696
ENSG00000007541.10	1370	1070	1576	1121	601	776	1138	1952	1791	1612	1087	1935
ENSG00000007545.11	582	391	643	441	317	303	533	641	458	572	462	620
ENSG00000007866.14	988	1066	660	840	183	143	227	225	290	327	229	234
ENSG00000007908.11	0	1	1	0	0	0	0	0	0	0	0	0
ENSG00000007923.11	2947	2060	3977	2527	604	1102	1657	1445	2503	2403	1346	1738
ENSG00000007933.8	15	11	1	5	0	0	0	2	0	0	0	0
ENSG00000007944.10	862	505	516	363	135	118	448	252	391	329	515	718
ENSG00000007952.13	0	0	1	2	0	0	0	0	0	0	0	0
ENSG00000007968.6	8	0	10	0	18	157	218	45	57	285	67	269
ENSG00000008018.8	4872	4922	5489	4511	2687	2176	3772	3259	5293	3759	2941	3634
ENSG00000008056.8	20	15	6	14	0	0	0	0	0	0	0	0
ENSG00000008083.9	1205	661	1558	632	281	344	484	352	763	1727	943	830
ENSG00000008086.6	458	348	469	270	50	31	40	54	933	971	1078	1684
ENSG00000008118.5	16	12	2	3	4	1	0	0	10	0	4	2
ENSG00000008128.18	343	230	320	221	105	81	146	129	315	305	185	189
ENSG00000008130.11	3168	1611	2629	2006	554	859	1271	1606	2880	2411	1392	1806
ENSG00000008196.8	7	11	0	10	0	0	1	0	0	0	0	0
ENSG00000008197.4	0	0	0	0	0	0	0	0	0	0	0	0
ENSG00000008226.15	16	6	3	8	6	7	26	40	0	3	22	12
ENSG00000008256.11	4382	2825	2833	3404	786	987	1836	2078	1615	2913	2028	1628
ENSG00000008277.10	83	29	54	32	225	137	525	230	954	425	1027	999
ENSG00000008282.3	3651	1907	3153	1575	1132	1386	5045	2784	921	1213	2421	2805
ENSG00000008283.11	1012	662	1224	670	3166	2294	3328	2003	2882	2167	1824	2098
ENSG00000008294.16	11666	7879	11041	8019	8053	6923	10834	18595	10655	9907	10144	10055
ENSG00000008300.10	417	367	328	340	241	248	414	1101	385	303	391	307
ENSG00000008311.10	1508	1164	624	1003	163	217	505	333	675	869	882	830
ENSG00000008323.11	1	3	6	0	5	0	2	4	1	0	0	1
ENSG00000008324.6	475	386	490	294	480	434	585	261	468	365	288	313
ENSG00000008382.11	257	213	361	181	130	80	142	150	551	335	300	426
ENSG00000008394.8	2266	2551	332	2040	5493	5544	11769	10520	1604	2642	2697	2637
ENSG00000008405.7	1368	817	1601	873	485	438	992	2126	1046	1341	435	650
ENSG00000008438.4	0	0	0	0	0	0	0	0	0	0	0	0
ENSG00000008441.12	1400	1545	492	1185	1362	985	1358	1324	717	652	442	606
ENSG00000008513.10	2987	1749	7079	2252	5724	2040	3724	3930	1791	2672	1976	1332
ENSG00000008516.12	14	7	15	8	15	5	3	14	11	4	7	6
ENSG00000008517.12	464	851	821	553	3392	1290	2335	2592	6637	3062	2523	2965
ENSG00000008710.13	5647	4618	2785	4663	1669	1088	1886	7635	5875	7610	7983	7325
ENSG00000008735.10	19	13	72	20	20	19	51	176	102	50	129	92
ENSG00000008838.13	1677	1643	2670	1428	1218	1209	1647	1000	2039	1230	1188	1250
ENSG00000008853.12	844	576	819	596	430	194	397	116	464	337	174	234
ENSG00000008869.7	3721	2294	3759	2145	1158	1227	2015	1879	2444	2001	2508	2077
ENSG00000008952.12	6197	4128	6879	4064	2747	2823	5291	3951	3276	3180	3256	3574
ENSG00000008988.5	23280	22259	20241	19090	11210	17370	26371	26685	41781	43011	46266	47290
ENSG00000009307.11	39768	23670	35596	27005	13843	11569	22040	18591	33147	19734	29018	30171
ENSG00000009335.13	9581	6076	8757	6167	5948	7817	10766	7986	10686	11695	6852	8408
ENSG00000009413.11	3773	2673	3916	1875	2257	1780	2650	2729	3009	2504	2191	2433
ENSG00000009694.9	11	23	5	8	41	86	157	82	8	4	19	17
ENSG00000009709.7	1	0	1	0	2	0	0	1	1	0	0	0
ENSG00000009724.12	1	0	1	0	1	4	1	0	1	0	1	2
ENSG00000009765.10	2	2	2	2	14	4	16	14	2	0	0	2
ENSG00000009780.11	249	291	526	261	208	263	357	287	482	557	421	512
ENSG00000009790.10	0	0	0	0	0	0	0	0	0	2	0	2
ENSG00000009830.7	917	920	1696	950	850	394	683	397	1352	812	251	383
ENSG00000009844.11	3570	2345	3297	2148	460	1707	1856	1383	785	2272	1421	1834
ENSG00000009950.11	2	0	1	0	3	2	10	33	3	2	20	8
ENSG00000009954.6	6724	4853	7520	5630	9849	7104	19591	12711	16437	10088	8177	10356
ENSG00000010017.9	2203	1479	1821	1321	489	413	913	674	1383	786	1263	1755
ENSG00000010030.9	85	77	57	52	3	0	3	5	18	12	29	34
ENSG00000010072.11	1474	822	1115	771	393	456	654	394	675	623	364	500
ENSG00000010165.15	1640	1409	1833	1190	1111	1387	1962	1461	1548	1400	1153	1279
ENSG00000010219.9	859	570	564	633	73	115	166	245	605	663	764	656
ENSG00000010244.12	6558	4704	7608	4502	3591	3308	9151	7231	5985	3514	4344	5344
ENSG00000010256.6	5879	4952	7837	4245	3472	2760	5091	4526	5767	4763	4942	4993
ENSG00000010270.9	2528	1482	3201	2036	3089	3016	3918	3337	4282	3171	2769	2449
ENSG00000010278.7	8939	4268	16123	5477	0	0	1	0	0	1	3	1
ENSG00000010282.10	0	0	2	1	1	0	3	1	0	2	1	1
ENSG00000010292.8	2716	1521	2321	1648	1752	2962	7457	2263	4504	4171	5600	7005
ENSG00000010295.15	701	418	893	404	330	162	361	151	635	427	389	554
ENSG00000010310.4	44	19	35	13	57	13	36	36	40	18	136	77
ENSG00000010318.15	149	83	142	107	73	40	94	55	168	164	231	213
ENSG00000010319.2	4	0	19	3	1	1	0	0	21	4	10	0
ENSG00000010322.11	4009	3866	4577	3343	980	784	1770	2305	2144	2129	3761	3712
ENSG00000010327.6	5	1	5	5	0	1	4	3	4	2	3	8
ENSG00000010361.9	272	311	311	224	7	2	2	17	0	10	6	12
ENSG00000010379.11	24	53	39	34	19	12	16	7	29	3	24	26
ENSG00000010404.13	2165	1232	2116	1298	1759	3592	4715	3097	2906	2771	2613	3194
ENSG00000010438.12	707	611	10	432	0	0	0	0	0	0	0	0
ENSG00000010539.7	664	415	793	369	517	494	829	584	533	465	454	481
ENSG00000010610.5	0	0	5	1	0	0	1	0	0	0	3	0
ENSG00000010626.10	247	221	297	209	217	238	397	705	293	605	823	1009
ENSG00000010671.11	1	0	0	2	0	0	0	0	2	0	0	0
ENSG00000010704.14	580	303	757	330	530	488	978	347	604	323	442	662
ENSG00000010803.12	825	619	977	562	640	727	1325	2335	1625	2366	2255	2192
ENSG00000010810.13	2890	2390	2329	2295	64	25	51	250	911	1042	653	547
ENSG00000010818.4	6074	4644	7260	3727	3013	1662	3388	4071	3783	3551	3182	3326
ENSG00000010932.11	0	1	12	2	0	2	0	0	0	0	0	0
ENSG00000011007.8	5424	3358	4409	3142	1647	2000	2607	2345	4228	3301	2854	2751
ENSG00000011009.6	3293	2742	4738	2200	1199	1185	1515	1572	4061	2252	1590	1615
ENSG00000011021.17	439	302	498	255	135	162	225	348	597	667	1112	911
ENSG00000011028.9	10681	7580	8919	7764	2210	2177	4404	5581	12218	14964	22478	23396
ENSG00000011052.17	0	0	0	0	0	0	0	0	0	0	0	0
ENSG00000011083.4	0	0	4	0	0	0	0	0	0	0	0	0
ENSG00000011105.7	1613	1877	2940	1765	1058	544	1592	1846	2779	1225	1519	1921
ENSG00000011114.10	2855	2345	5413	2252	1201	807	1908	853	1835	1139	1503	2360
ENSG00000011132.7	904	651	745	582	504	370	533	723	560	650	992	753
ENSG00000011143.12	362	258	407	309	153	193	347	502	464	658	696	614
ENSG00000011198.3	1382	883	1292	845	816	583	779	695	773	618	408	396
ENSG00000011201.6	567	277	1308	319	0	0	0	0	0	0	0	2
ENSG00000011243.13	2748	2148	2581	1646	1476	917	1341	1269	2635	1782	2143	2319
ENSG00000011258.11	608	416	632	374	362	253	704	432	846	540	1205	1044
ENSG00000011260.9	1087	934	1549	912	780	997	1719	1630	1629	1717	1038	1308
ENSG00000011275.14	4195	3292	4028	3097	3614	4544	8741	6690	4887	5945	5159	4902
ENSG00000011295.11	1640	1671	3174	1748	1022	674	1626	2437	3409	1769	2370	2376
ENSG00000011304.12	6841	5028	7717	4713	4052	4680	8111	7544	7619	6198	4749	5216
ENSG00000011332.15	31	41	18	29	17	11	38	10	14	8	4	8
ENSG00000011347.5	21	21	1	23	49	36	38	65	9	28	29	30
ENSG00000011376.5	1977	1200	2253	1349	1005	909	1531	902	1226	650	453	572
ENSG00000011405.9	5617	5174	8418	5124	3945	3682	6798	3956	6385	4090	4490	4373
ENSG00000011422.7	2226	2647	2092	2379	1999	2132	2660	2883	1727	3372	1774	1424
ENSG00000011426.6	672	307	902	336	1836	6561	14868	7911	4879	5800	5534	6727
ENSG00000011451.13	1643	1602	1486	1454	705	727	1127	1251	1814	1333	1293	1465
ENSG00000011454.12	3256	1826	2725	2267	1320	1286	2371	2404	4090	2616	3186	3264
ENSG00000011465.12	17672	19659	8406	13516	5	1	1	0	3	0	0	0
ENSG00000011478.7	848	689	631	564	263	304	520	278	540	693	769	722
ENSG00000011485.10	2623	1866	2665	1829	1902	1382	2449	1440	1995	1508	902	1217
ENSG00000011523.9	850	705	1075	598	528	183	850	634	1189	560	1462	1722
ENSG00000011566.10	4567	3246	5222	3054	1875	1503	3873	3280	1607	1190	1245	1650
ENSG00000011590.9	0	0	0	0	1	0	0	2	0	0	3	0
ENSG00000011600.7	0	0	0	0	1	0	1	0	0	0	0	0
ENSG00000011638.6	3078	1769	4030	1927	5143	1766	2972	4202	1241	938	2360	1760
ENSG00000011677.8	1	1	0	2	0	2	0	0	8	1	0	6
ENSG00000012048.15	534	298	765	440	544	1634	2979	1764	753	3425	1927	2405
ENSG00000012061.11	2784	2664	2470	2086	1922	1358	2070	1843	2227	1703	1686	2005
ENSG00000012124.10	0	2	10	0	108	72	71	109	18	12	43	15
ENSG00000012171.13	196	198	263	211	121	223	208	770	1280	2067	4687	3818
ENSG00000012174.7	673	488	634	408	216	210	457	469	582	542	606	726
ENSG00000012211.8	208	220	287	170	144	224	274	263	443	517	400	438
ENSG00000012223.8	1	0	17	0	1	0	0	2	2	11	1	0
ENSG00000012232.4	3698	2049	4072	2403	3528	2046	3568	1431	2773	1409	638	971
ENSG00000012504.9	111	186	1166	113	416	430	1351	2084	126	26	317	348
ENSG00000012660.9	6169	4032	5725	3527	2832	2438	4738	2331	8076	3846	3636	4749
ENSG00000012779.6	44	83	118	61	20	55	89	355	50	120	409	90
ENSG00000012817.11	2	0	0	0	0	3	1	1	1732	1766	2562	2569
ENSG00000012822.11	4327	2501	3488	2441	1436	795	1176	1129	2198	1576	3115	2735
ENSG00000012963.9	1134	779	1604	850	391	714	1369	547	741	1224	1113	1730
ENSG00000012983.7	5070	3508	4878	3356	1324	1056	2066	1636	1377	1765	2020	1940
ENSG00000013016.10	2109	3262	1699	2327	110	74	181	235	56	61	21	51
ENSG00000013275.3	3485	3382	4558	3103	2529	2308	3470	3965	3145	2062	939	1377
ENSG00000013288.4	3895	3169	3343	2539	1984	1559	1855	1258	4034	4401	2339	2927
ENSG00000013293.5	44	44	122	31	5	1	0	1	0	0	0	0
ENSG00000013297.6	6821	8233	1640	5289	8	0	9	2	11	10	0	12
ENSG00000013306.11	3889	3157	5493	3131	3658	2406	5633	6051	5515	4025	2256	2363
ENSG00000013364.14	14667	11271	22599	11814	6941	6860	10285	10280	13869	10534	13717	15669
ENSG00000013374.11	3563	1658	3064	2572	4166	1494	5418	6573	8497	3500	5805	6316
ENSG00000013375.11	5528	5454	5649	5111	1338	2010	3316	1113	2724	4238	6660	5750
ENSG00000013392.6	809	510	791	436	226	134	213	138	569	486	524	649
ENSG00000013441.11	2488	1549	4561	1400	1300	1521	2516	2766	2811	2905	3324	1743
ENSG00000013503.5	976	966	1140	967	505	629	982	671	824	585	282	425
ENSG00000013523.5	597	481	679	410	218	181	306	222	577	408	439	509
ENSG00000013561.13	3998	2610	4575	2762	1158	1550	2584	3482	2369	2670	2976	3106
ENSG00000013563.9	2348	2008	2088	1781	1516	2118	2200	1438	2159	2412	2222	2390
ENSG00000013573.12	156	179	339	175	564	670	1411	826	678	1247	1320	1409
ENSG00000013583.4	1038	965	1061	754	548	469	801	655	511	478	534	553
ENSG00000013588.5	7014	3399	6284	4026	4466	4669	7050	9860	1192	1630	1473	1099
ENSG00000013619.9	107	55	131	93	146	85	219	60	398	274	153	188
ENSG00000013725.10	1	0	1	0	1	0	0	0	1	0	0	1
ENSG00000013810.14	323	218	498	190	495	1056	2655	833	1466	1820	2072	2582
ENSG00000014123.9	3058	1649	3086	1561	940	748	1862	1582	2069	1562	2746	2519
ENSG00000014138.4	607	374	582	419	243	421	1018	324	402	786	338	697
ENSG00000014164.6	463	345	371	280	441	285	383	715	939	696	741	848
ENSG00000014216.11	6562	4066	11814	6182	2580	1837	3040	2819	5997	3399	3753	4028
ENSG00000014257.11	1	0	0	0	49	19	8	0	0	0	1	0
ENSG00000014641.13	7730	5803	8487	5105	4416	5085	7843	4467	4827	3459	3219	3902
ENSG00000014824.9	4133	3353	5735	3304	1692	2034	3614	2520	4371	3365	2774	3735
ENSG00000014914.15	438	214	670	281	125	98	210	398	495	573	2131	1353
ENSG00000014919.8	1105	1680	1698	1265	1037	1692	2869	2441	1835	2052	2375	2627
ENSG00000015133.14	496	399	773	281	8	1	4	2	363	294	115	226
ENSG00000015153.10	864	556	846	472	310	392	743	564	514	535	333	600
ENSG00000015171.14	5429	3374	4279	2977	1112	1435	2110	2133	4838	3820	2509	3355
ENSG00000015285.6	6	7	9	3	12	2	1	6	29	12	13	17
ENSG00000015413.5	3	4	9	0	2	0	0	3	13	1	19	21
ENSG00000015475.14	1376	1187	1685	1012	2268	1469	3468	2703	2468	2480	2510	2956
ENSG00000015479.13	19873	10538	18087	11206	7210	7737	16490	9527	13546	8054	7725	9380
ENSG00000015520.10	1	0	4	2	33	2	0	6	15	2	11	3
ENSG00000015532.5	1286	1416	2678	1493	1573	658	1145	863	3416	2916	2437	2254
ENSG00000015568.8	45	35	31	18	52	25	30	42	57	33	34	31
ENSG00000015592.12	1	0	0	0	0	0	0	0	6	0	0	0
ENSG00000015676.13	4469	3338	4646	3322	1397	3587	5031	4572	2912	5557	4673	4535
ENSG00000016082.10	2	1	1	2	0	1	1	3	1	0	1	0
ENSG00000016391.6	39	35	156	26	5	0	1	0	1	0	0	0
ENSG00000016402.8	29	74	36	25	1	2	1	0	0	0	0	0
ENSG00000016490.11	1	0	3	0	0	0	0	0	0	0	0	0
ENSG00000016602.8	0	0	1	0	0	0	0	0	1	0	0	0
ENSG00000016864.12	2493	2291	1822	2068	812	823	1111	600	2078	2163	1955	2553
ENSG00000017260.15	4717	4245	8314	4378	4524	3322	7924	4392	6424	4090	4544	5251
ENSG00000017373.11	2	5	4	5	75	40	86	258	17	13	89	37
ENSG00000017427.11	11	9	6	4	0	0	0	0	0	0	0	0
ENSG00000017483.10	711	684	62	714	0	2	2	11	52	33	108	371
ENSG00000017621.11	46	35	55	40	27	8	16	41	101	33	60	80
ENSG00000017797.7	5759	3430	5075	3796	1884	1485	2576	1261	5212	3529	3354	3865
ENSG00000018189.8	1635	1232	1770	1010	996	769	1070	1390	2091	2156	2351	2228
ENSG00000018236.10	4394	2462	741	1808	0	1	2	0	89	45	2	7
ENSG00000018280.12	8	4	10	8	7	14	6	7	24	31	23	40
ENSG00000018408.10	10095	5709	15201	5793	6576	4020	10806	3702	16673	3523	6142	9502
ENSG00000018510.8	5344	4147	7819	3978	4146	3596	7252	7363	10028	4902	5349	7087
ENSG00000018607.5	9	4	0	1	0	0	1	2	0	0	0	0
ENSG00000018610.9	1314	435	1017	791	1026	1053	1768	1082	1021	867	900	1025
ENSG00000018625.10	1	0	2	2	3	4	7	12	45	11	59	28
ENSG00000018699.7	1224	965	1629	928	515	794	1335	1276	1456	1586	1532	1407
ENSG00000018869.12	168	164	102	99	0	2	0	0	30	8	11	9
ENSG00000019102.7	0	0	0	0	0	0	0	0	0	0	0	0
ENSG00000019144.12	6373	6396	8278	6352	2207	1181	2000	1964	7614	3263	4002	4403
ENSG00000019169.9	0	0	1	0	39	1	2	2	24	1	1	0
ENSG00000019186.5	3	2	8	1	0	2	0	0	5	0	0	2
ENSG00000019485.8	353	346	412	271	119	104	165	268	229	195	156	228
ENSG00000019505.3	1124	745	2984	791	1	1	1	2	3083	1890	6084	7307
ENSG00000019549.4	1756	1944	587	1531	147	48	140	106	2510	1076	883	837
ENSG00000019582.10	190	292	420	153	132	43	107	632	556	248	562	505
ENSG00000019991.11	68	66	6	31	1	0	0	0	0	0	0	1
ENSG00000019995.6	3514	2464	2824	2121	971	892	1903	1861	2234	2332	1891	2055
ENSG00000020129.11	1951	1773	1943	1636	1151	974	1222	1969	2214	1059	1106	1182
ENSG00000020181.13	1675	1601	120	1420	48	86	207	543	72	318	225	163
ENSG00000020219.8	0	0	1	0	2	1	2	0	0	0	0	0
ENSG00000020256.15	1279	1204	1159	1007	342	411	732	369	877	904	958	1027
ENSG00000020426.6	1224	816	963	763	301	403	516	619	579	580	485	607
ENSG00000020577.9	4924	4416	7403	3967	1137	707	1869	5057	1563	1337	1513	1754
ENSG00000020633.14	10	6	1	4	0	0	0	0	0	0	0	0
ENSG00000020922.8	845	633	889	609	254	456	843	220	588	1005	947	1117
ENSG00000021300.9	117	91	213	78	19	20	23	24	52	20	25	31
ENSG00000021355.8	1920	911	2056	909	1053	1142	1879	1919	3315	4859	7564	6628
ENSG00000021461.12	0	2	0	0	0	0	0	0	1	0	3	2
ENSG00000021488.8	4	4	4	3	4	11	16	17	0	3	13	7
ENSG00000021574.7	1747	1210	1975	982	722	960	1811	1208	1413	1031	702	836
ENSG00000021645.13	2089	1228	163	916	17	40	68	7	250	247	327	401
ENSG00000021762.15	865	522	471	698	162	284	511	338	1082	919	1970	2001
ENSG00000021776.6	4268	2375	3580	2417	1542	1830	2926	2281	3304	2603	1825	2458
ENSG00000021826.10	409	138	246	195	563	700	1529	575	2872	1947	2806	3429
ENSG00000021852.8	0	0	0	2	1	0	0	0	1	0	0	0
ENSG00000022267.12	6455	8150	3639	7307	1907	811	2881	2220	1348	1279	1702	2206
ENSG00000022277.8	4839	3626	4224	3313	1726	2030	3064	3357	5540	4840	3894	4065
ENSG00000022355.10	5	3	2	0	0	0	0	0	0	0	0	0
ENSG00000022556.11	214	266	220	168	3	7	3	1	1	0	0	0
ENSG00000022567.5	491	271	520	265	248	386	487	577	559	621	213	193
ENSG00000022840.11	4448	3360	4341	3263	1365	3028	3752	5672	3017	3553	3759	4620
ENSG00000022976.11	662	442	645	403	218	209	506	489	439	403	437	502
ENSG00000023041.7	1312	697	1142	813	377	680	1308	833	1281	985	1128	1073
ENSG00000023171.10	241	183	182	114	4	15	15	5	6	0	1	2
ENSG00000023191.12	9106	8028	10282	8121	2651	2610	4587	6023	4205	4080	4011	4055
ENSG00000023228.9	9688	6736	13055	6760	4289	4670	9136	7211	8751	6715	5041	6045
ENSG00000023287.8	5197	4488	6636	4085	5203	4768	8279	11157	14003	11996	9728	9101
ENSG00000023318.7	2456	1486	2421	1436	1397	1893	1854	1950	3958	3492	2109	2450
ENSG00000023330.10	2374	1771	2831	1507	2504	1819	2266	2703	2952	1930	1417	1582
ENSG00000023445.9	1632	1289	8884	1103	10872	5472	8940	8760	1873	2128	2104	4309
ENSG00000023516.7	5851	3021	3816	3042	983	749	2087	1488	2121	1628	1942	2544
ENSG00000023572.4	530	481	578	460	234	391	637	557	499	478	264	265
ENSG00000023608.4	1610	1217	1828	1007	1361	927	2158	4740	332	332	548	592
ENSG00000023697.8	1542	1028	1989	1069	668	904	1341	894	2109	1795	2246	2606
ENSG00000023734.6	5762	5390	7307	4795	3797	3330	5674	3808	6917	3982	3302	4156
ENSG00000023839.6	32	23	48	40	2371	1652	2186	5218	363	191	106	115
ENSG00000023892.9	23	25	35	22	4	6	6	20	3	5	5	4
ENSG00000023902.9	1184	1388	1128	883	25	26	24	63	2208	964	804	933
ENSG00000023909.5	1498	857	1920	800	4324	4321	12690	4999	2085	1157	1405	1374
ENSG00000024048.6	5092	2954	4039	2834	1209	1005	1676	1532	2268	1385	1833	2091
ENSG00000024422.7	3331	2828	1956	2582	1184	1027	1248	2124	1120	1114	2046	1728
ENSG00000024526.12	112	10	148	20	395	1369	3447	1418	2039	2076	2510	2463
ENSG00000024862.12	522	350	569	274	129	191	254	315	380	937	1001	1101
ENSG00000025039.10	440	253	929	244	944	698	1133	1323	90	62	143	41
ENSG00000025156.8	852	629	741	452	300	381	680	672	751	863	670	739
ENSG00000025293.11	3407	1910	2844	2019	1659	1295	2186	2059	3882	3241	3181	3614
ENSG00000025423.7	13	12	18	7	26	30	63	30	9	5	12	9
ENSG00000025434.14	173	232	179	150	123	169	257	389	73	172	244	156
ENSG00000025708.8	551	351	833	410	596	822	2110	4750	265	474	932	1409
ENSG00000025770.14	800	610	1063	616	537	831	1433	516	1023	1691	1599	2223
ENSG00000025772.7	2463	2075	2919	2031	1021	937	1558	1308	1789	3331	1532	1955
ENSG00000025796.9	1876	1401	1519	1361	471	298	734	671	1653	836	1267	1368
ENSG00000025800.9	10353	5982	9894	6094	3709	3356	4610	4160	10804	7421	5960	7389
ENSG00000026025.9	126098	131573	117972	110267	43465	64157	102439	55721	125159	118247	228665	214934
ENSG00000026036.16	74	41	154	51	19	20	59	28	98	53	86	93
ENSG00000026103.15	3900	1566	4485	2312	2911	2245	2980	3325	1206	1527	2132	2046
ENSG00000026297.11	1304	1384	2949	993	189	98	254	812	18928	18577	36376	31369
ENSG00000026508.12	20470	7212	23514	11595	22924	18501	36060	18996	11724	13900	9436	8001
ENSG00000026559.9	488	718	18	602	37	45	136	327	0	0	0	2
ENSG00000026652.9	986	847	4490	610	1275	800	1995	1779	4363	2456	3069	2789
ENSG00000026751.12	6	7	13	2	394	220	304	417	71	93	52	66
ENSG00000026950.12	1043	599	529	423	724	568	954	354	1099	1243	1762	1828
ENSG00000027001.7	534	558	1151	546	270	602	492	425	700	1005	620	784
ENSG00000027075.9	209	173	387	164	195	139	255	108	198	91	100	96
ENSG00000027644.4	1	0	1	0	1	0	0	2	0	0	0	0
ENSG00000027697.8	3755	2005	3557	2086	1720	1125	2176	1651	2042	2006	1043	1192
ENSG00000027847.9	1688	1434	1414	1268	768	500	737	783	1791	1585	1039	1291
ENSG00000027869.7	20	15	15	25	1	0	0	0	5	0	1	2
ENSG00000028116.12	990	706	1141	654	668	957	1554	1370	1535	1369	1088	1119
ENSG00000028137.12	164	80	10	104	0	0	0	0	0	0	0	0
ENSG00000028203.13	4504	2479	5671	3265	3281	4122	5016	4407	3137	3785	2038	2373
ENSG00000028277.16	142	77	409	124	8	7	14	8	7	6	20	21
ENSG00000028310.13	1459	1080	1936	1150	1025	689	1362	1127	3590	2924	2562	2632
ENSG00000028528.10	3389	2813	3622	2488	2035	1498	2288	1816	3637	2608	2697	3068
ENSG00000028839.5	880	694	661	544	294	365	612	371	717	637	478	522
ENSG00000029153.10	1528	684	1299	724	2474	1127	3394	1539	1899	1435	1142	1976
ENSG00000029363.11	11445	7931	11294	7071	2656	3649	8119	6144	5685	5224	3363	4785
ENSG00000029364.7	7571	4107	6131	4006	2141	2702	4535	3831	4303	3172	3578	3906
ENSG00000029534.15	493	233	1222	264	220	268	603	176	7	5	7	1
ENSG00000029559.5	0	0	0	0	0	0	0	0	0	2	0	0
ENSG00000029639.6	602	487	648	468	240	231	388	324	469	822	529	539
ENSG00000029725.12	4745	2858	4518	3131	3038	2411	3927	3313	3664	2434	2015	2339
ENSG00000029993.10	861	758	1475	833	563	912	2933	1022	771	1315	1757	2446
ENSG00000030066.9	2084	1423	1696	1202	1603	1771	3020	2180	2124	1790	1908	1728
ENSG00000030110.8	1718	1280	2037	1160	714	1431	2183	2145	634	1073	595	713
ENSG00000030304.8	6	1	2	5	3	0	0	4	2	0	0	0
ENSG00000030419.12	645	409	550	261	35	60	176	46	71	84	149	201
ENSG00000030582.12	5867	4475	5425	3386	10172	6325	10070	10570	11543	9359	9305	8936
ENSG00000031003.6	2653	1894	1935	1612	1611	2061	3066	3226	2079	1764	1373	1687
ENSG00000031081.6	3173	2640	4411	2127	1923	1298	3503	1311	1359	1685	1015	1092
ENSG00000031544.10	15	4	21	0	6	7	14	10	14	1	2	5
ENSG00000031691.6	177	105	198	85	69	198	296	54	108	317	140	247
ENSG00000031698.8	9090	10541	10332	11175	5643	5368	10796	19152	16638	20289	18483	15669
ENSG00000031823.10	2419	1815	2546	1609	1197	1296	2269	1490	2286	2128	1456	1796
ENSG00000032219.14	1335	787	1114	670	489	501	783	620	810	635	866	998
ENSG00000032389.8	1216	1225	1840	1138	362	500	879	823	1218	686	523	745
ENSG00000032444.11	4535	3526	3822	3119	1079	881	1292	1519	2758	2480	2500	2668
ENSG00000032742.13	543	469	793	384	227	316	361	357	1110	906	592	761
ENSG00000033011.7	1686	1613	1583	1402	846	910	1583	1270	1040	578	530	757
ENSG00000033030.9	1248	776	1260	803	611	945	1900	2046	1267	1564	1348	1689
ENSG00000033050.3	5613	3718	5147	4030	4396	3918	6943	6493	6309	4442	1889	2674
ENSG00000033100.10	7021	4978	5352	4282	8671	5324	8334	4362	6976	5000	3266	4279
ENSG00000033122.14	266	282	452	167	22	6	23	8	11	2	14	7
ENSG00000033170.12	1575	1507	2827	1284	854	684	1191	797	1795	939	739	1109
ENSG00000033178.8	6475	4101	8503	4315	13969	13460	32948	18802	18829	15014	9652	10886
ENSG00000033327.8	2293	1655	2988	1535	1040	266	611	421	953	810	557	571
ENSG00000033627.10	2110	1592	3005	1829	1803	1949	2749	3571	824	695	960	860
ENSG00000033800.9	1010	723	1010	653	557	539	788	564	1017	890	1087	1399
ENSG00000033867.12	3316	2253	4565	2643	5615	2768	9548	6809	5067	2131	2509	3044
ENSG00000034053.10	1874	1431	2066	1407	738	916	1349	1020	0	1	6	7
ENSG00000034063.9	230	119	267	158	353	906	2585	352	755	1097	517	1229
ENSG00000034152.14	1083	1061	929	909	732	900	842	1128	409	330	287	257
ENSG00000034239.6	2	0	3	1	0	0	0	0	0	0	0	0
ENSG00000034510.4	48029	51553	65298	44071	62148	28567	56342	29490	112468	56594	62987	72708
ENSG00000034533.7	210	225	229	162	152	260	275	239	315	512	305	405
ENSG00000034677.7	5022	3086	6450	2821	1154	1143	1982	1886	3721	3826	3471	3807
ENSG00000034693.10	959	533	1210	514	347	425	691	617	627	767	610	712
ENSG00000034713.3	2943	2197	2720	1807	2114	1215	1788	2269	3142	1770	1772	2085
ENSG00000034971.10	0	3	4	0	0	0	0	0	0	0	0	0
ENSG00000035115.17	841	544	876	610	321	278	753	761	1851	1446	2414	2094
ENSG00000035141.3	2508	1519	3401	1559	1922	2086	3420	2263	2238	2202	2033	2032
ENSG00000035403.12	20942	18873	29028	20264	7787	11519	22536	18452	14555	14468	13704	16294
ENSG00000035499.8	31	24	185	32	55	196	534	179	128	287	268	264
ENSG00000035664.7	12	16	15	8	235	172	264	274	43	45	37	35
ENSG00000035681.3	2102	1545	2496	1430	1596	2495	3712	3956	3722	4626	2658	2726
ENSG00000035687.9	2803	2260	2918	2124	1326	2133	2979	3082	2522	2923	1806	2000
ENSG00000035720.3	0	0	0	0	0	0	0	0	2	2	1	3
ENSG00000035862.8	11174	10824	7643	8662	6938	5135	13994	11075	3677	4387	5334	5227
ENSG00000035928.10	4344	3434	4649	3279	2331	2859	5575	3078	6428	6441	6374	6994
ENSG00000036054.8	4045	2543	3150	2266	2280	2644	3769	2522	3769	3219	2797	2830
ENSG00000036257.8	4745	3204	5440	2793	2090	2167	3286	3035	3244	2213	2249	2936
ENSG00000036448.5	31	8	46	22	58	76	98	216	73	91	125	58
ENSG00000036473.6	0	0	0	0	0	1	0	0	0	0	0	0
ENSG00000036530.4	2	5	6	2	6	4	6	10	9	18	17	20
ENSG00000036549.8	4131	2832	4346	2713	2351	2437	4722	4319	4867	4430	5094	5030
ENSG00000036565.10	0	4	0	0	0	0	0	0	0	0	0	0
ENSG00000036672.11	20	28	14	10	39	28	50	158	30	25	66	54
ENSG00000036828.9	1	4	1	0	0	0	1	2	0	0	0	0
ENSG00000037042.8	435	281	445	279	125	163	241	319	343	650	587	546
ENSG00000037241.3	1038	943	995	911	890	425	1088	1463	1394	532	750	922
ENSG00000037280.11	20	8	9	6	4	2	20	6	0	0	0	3
ENSG00000037474.10	3451	2508	3700	2545	3750	3673	6336	5114	7954	6981	3343	3786
ENSG00000037637.6	1707	1463	1924	1166	652	444	934	2041	1800	1785	1132	1329
ENSG00000037749.7	4207	2686	3269	2469	2453	1282	2537	2214	3034	1666	1595	2025
ENSG00000037757.9	841	760	1335	747	1640	641	1285	939	1243	949	1931	1841
ENSG00000037897.12	497	480	492	458	218	310	579	490	360	472	352	356
ENSG00000037965.4	423	587	209	370	32	38	57	38	120	116	76	77
ENSG00000038002.4	1537	1261	1542	1032	490	764	1541	1661	548	761	488	559
ENSG00000038210.9	1170	324	1299	566	959	679	2233	921	1675	1044	1405	1601
ENSG00000038219.8	7498	5281	9260	4891	5099	3641	7400	4788	8380	7579	6328	6029
ENSG00000038274.12	3590	2002	2956	1681	1002	1655	3188	1727	1703	2842	2469	2922
ENSG00000038295.3	388	311	1085	183	33	9	46	74	127	64	31	69
ENSG00000038358.10	2680	1976	2420	1682	1884	1233	1900	1845	2422	1629	1934	2535
ENSG00000038382.13	19554	15392	17917	12780	14067	13082	23396	31828	34789	34601	29666	31808
ENSG00000038427.11	44461	66263	75036	52964	11596	11201	37950	22095	48405	26775	40383	70211
ENSG00000038532.10	1599	1349	1946	1164	626	719	1143	1064	1192	921	482	802
ENSG00000038945.10	6	6	6	4	196	1161	1287	1873	390	859	911	852
ENSG00000039068.14	50	101	81	24	3	0	1	4	0	0	19	57
ENSG00000039123.11	4214	3121	4150	2950	1344	1943	3307	3194	1944	1603	1656	1876
ENSG00000039139.9	359	241	591	256	441	641	571	743	985	1551	879	1229
ENSG00000039319.12	3833	2280	4243	2295	1256	966	2242	2129	1701	1416	1347	1700
ENSG00000039523.13	875	751	1207	662	829	382	610	1228	1404	1036	1509	1535
ENSG00000039537.9	0	1	0	2	0	0	3	5	16	0	0	1
ENSG00000039560.9	27891	26559	32251	24200	20462	12323	29328	19811	20135	15537	12972	13281
ENSG00000039600.6	5	2	2	4	0	2	7	14	0	2	5	5
ENSG00000039650.5	968	673	1182	660	430	408	731	552	816	582	485	547
ENSG00000039987.2	1	2	0	4	3	0	1	0	0	0	2	0
ENSG00000040199.14	1391	781	1869	735	1263	1310	1558	2484	2706	1653	832	1015
ENSG00000040275.12	2149	1241	1689	940	895	1882	3216	1023	2525	3637	1886	1906
ENSG00000040341.13	2597	1487	2741	1472	960	1617	2296	1621	2954	2816	2730	3647
ENSG00000040487.8	708	643	979	521	371	362	462	599	997	1376	810	831
ENSG00000040531.10	976	743	1399	702	509	328	617	1038	539	352	314	310
ENSG00000040608.9	83	102	124	65	100	54	172	120	475	268	603	571
ENSG00000040633.8	2718	2782	3500	2053	2114	1427	2587	3131	2242	1226	777	1115
ENSG00000040731.6	243	154	153	91	2	0	0	2	0	0	1	0
ENSG00000040933.11	1705	976	1591	1079	1196	1008	1914	1159	1971	1822	1112	1293
ENSG00000041353.5	701	356	921	293	1108	1826	2227	1768	803	613	239	266
ENSG00000041357.11	4827	4048	4673	3695	3547	3421	5877	5802	5256	3700	2449	2747
ENSG00000041515.11	13	0	11	4	12	7	4	2	4	2	3	3
ENSG00000041802.6	2522	1928	2837	1966	2756	3245	4320	4136	2240	2708	976	1259
ENSG00000041880.10	890	772	1957	783	1248	759	1573	1609	1803	955	974	1129
ENSG00000041982.10	16941	12585	41581	16362	5860	2016	6465	2145	6862	4888	1749	1290
ENSG00000041988.11	856	637	778	589	169	205	292	280	769	652	820	762
ENSG00000042062.7	3	6	24	6	1	2	0	6	4	1	18	22
ENSG00000042088.9	1432	653	1473	749	468	592	968	386	736	813	564	760
ENSG00000042286.10	362	276	450	289	303	212	414	753	794	785	1142	1077
ENSG00000042304.6	0	0	0	0	0	0	0	0	0	0	0	0
ENSG00000042317.12	533	371	368	289	37	35	48	53	252	273	285	356
ENSG00000042429.6	2396	1841	2581	1615	616	568	952	771	1613	1093	909	1232
ENSG00000042445.9	5357	3627	8107	4056	3157	3182	5438	6597	5058	3466	6921	5222
ENSG00000042493.11	5896	6739	20810	6450	18044	10534	30426	19685	10528	6371	11179	11487
ENSG00000042753.7	5084	5669	4448	4330	3141	3001	4606	3886	4554	4077	3572	3748
ENSG00000042781.8	6	3	21	5	2	11	5	1	10	2	0	3
ENSG00000042813.3	2	0	1	0	0	0	0	0	0	0	0	0
ENSG00000042832.7	299	218	230	168	227	62	142	156	26	9	31	15
ENSG00000042980.8	28	50	124	11	33	69	53	34	5	11	37	23
ENSG00000043039.5	1	0	0	0	77	118	218	492	50	195	139	145
ENSG00000043093.9	2814	1221	2399	1333	1587	1988	3807	2324	2103	988	1124	1567
ENSG00000043143.16	1829	1156	2206	1258	3204	1770	4577	3732	1851	1289	1814	2247
ENSG00000043355.6	8	3	1	1	58	48	91	58	270	146	167	214
ENSG00000043462.7	3	0	0	0	0	0	1	0	1	2	2	1
ENSG00000043514.11	1202	853	1080	837	396	555	728	1062	1165	1580	1410	1452
ENSG00000043591.4	8	7	1	1	0	0	2	4	0	0	0	0
ENSG00000044012.3	0	3	0	0	0	0	0	0	0	0	0	0
ENSG00000044090.4	3108	2138	3383	2042	575	411	1054	921	3118	2305	5945	5383
ENSG00000044115.16	26131	19925	35916	19314	10756	9340	17634	17599	24091	20092	21254	24150
ENSG00000044446.7	771	521	1049	492	107	178	326	327	1497	1858	4067	4939
ENSG00000044459.10	569	384	732	341	293	539	1405	737	384	620	725	921
ENSG00000044524.6	1353	1128	255	724	9	2	7	8	1	0	0	0
ENSG00000044574.7	15911	10984	17270	13696	8563	7576	12673	19850	21712	24819	22052	12968
ENSG00000046604.8	4650	3500	5303	3614	3950	5830	5383	5130	9942	9721	9024	7883
ENSG00000046647.9	560	416	620	421	87	83	103	75	673	528	653	672
ENSG00000046651.10	1847	1092	1763	1034	341	346	656	710	1119	1226	1668	1867
ENSG00000046653.10	32	17	4	18	0	1	0	0	0	0	0	0
ENSG00000046774.9	0	0	0	0	0	0	0	0	4	0	3	0
ENSG00000046889.14	583	1010	3303	895	172	124	484	1316	9829	7399	10576	10213
ENSG00000047056.10	1724	728	2220	1106	478	417	562	402	796	586	682	784
ENSG00000047188.11	2211	1281	2538	1414	642	714	1231	1600	2024	1608	1101	1411
ENSG00000047230.10	1181	521	1478	734	198	279	544	322	1495	1105	1270	1654
ENSG00000047249.12	2189	2559	5057	2216	2265	2124	4460	5282	3323	2353	2505	2703
ENSG00000047315.10	7778	4998	8216	4907	7648	6203	10113	6575	14387	7948	5750	6815
ENSG00000047346.8	1377	978	1598	694	631	412	677	513	768	329	505	575
ENSG00000047365.7	1468	940	3843	851	724	1052	1633	1558	712	1014	565	794
ENSG00000047410.9	15495	9310	14499	8948	6790	5877	11567	6222	13116	9719	10364	11384
ENSG00000047457.9	149	112	657	68	4324	2955	12456	18331	3989	5351	9997	16012
ENSG00000047578.8	1345	1091	1627	1061	918	749	1338	1930	2007	1387	1569	1935
ENSG00000047579.15	215	126	236	163	43	37	61	65	169	166	171	164
ENSG00000047597.5	10	2	22	13	57	85	171	117	1	4	1	0
ENSG00000047617.10	13	24	249	30	1	1	3	0	78	6	26	31
ENSG00000047621.7	1748	538	1527	1070	382	387	801	917	1331	772	734	794
ENSG00000047634.10	489	230	407	198	278	449	613	310	824	1213	1170	1109
ENSG00000047644.13	2098	1656	1070	1819	1089	934	1927	3558	1811	5257	2664	3307
ENSG00000047648.17	121	108	219	86	49	9	42	15	260	101	288	474
ENSG00000047662.4	0	4	0	2	1	1	2	2	4	2	3	4
ENSG00000047849.17	16310	8792	13774	12580	5598	6682	10826	9562	11028	12747	11155	12952
ENSG00000047932.9	3203	3510	3082	2983	1118	1297	2769	2134	2006	2267	2372	2562
ENSG00000047936.6	57	69	14	40	19	4	6	7	169	29	1	2
ENSG00000048028.7	1136	925	1226	761	485	563	1086	601	1545	1528	1055	1181
ENSG00000048052.17	3115	1696	6560	2080	1262	3861	4469	4749	1494	1934	1397	769
ENSG00000048140.13	2768	2828	3488	2219	1105	1452	2142	2118	1674	2745	1002	1689
ENSG00000048162.15	877	755	867	841	590	897	1420	1078	1064	910	592	663
ENSG00000048342.11	1423	1360	1185	1079	594	579	823	569	172	26	41	122
ENSG00000048392.7	12952	7581	11398	6791	7437	8821	13364	25158	9361	14963	17030	13753
ENSG00000048405.5	1362	792	1593	752	699	1007	1922	1694	1479	1817	1791	1711
ENSG00000048462.6	0	1	1	0	0	1	0	0	1	0	0	0
ENSG00000048471.9	1685	1092	2672	1013	526	995	947	634	1547	1475	977	2195
ENSG00000048540.10	1	0	0	0	0	0	0	0	0	0	0	0
ENSG00000048544.5	3020	1865	3040	1999	1564	1587	2551	3103	3112	2069	1570	2289
ENSG00000048545.9	0	0	1	0	0	0	1	0	0	0	0	0
ENSG00000048649.9	3706	3515	5393	2976	1235	942	2549	2481	2630	1896	2741	3031
ENSG00000048707.9	6338	3522	6661	3848	2071	2279	5679	4348	6463	6834	5173	5540
ENSG00000048740.13	2032	985	2689	1040	6	4	5	0	3	0	2	0
ENSG00000048828.12	7864	6644	8166	5917	4752	8499	13660	9611	9958	11904	9438	10292
ENSG00000048991.12	725	551	933	535	412	678	1182	672	1045	961	725	838
ENSG00000049089.9	9	36	29	16	59	15	41	29	35	5	17	27
ENSG00000049130.9	1163	796	910	680	1069	4020	5514	3492	681	1286	902	1478
ENSG00000049167.9	564	347	573	412	177	306	458	530	437	481	230	289
ENSG00000049192.10	1948	1141	285	945	16	22	28	13	391	869	228	207
ENSG00000049239.8	2975	2086	2937	2080	1603	2108	2139	3085	5718	8011	6067	6714
ENSG00000049245.8	12120	6579	8576	6091	2636	2354	2875	2073	9591	5463	5462	5945
ENSG00000049246.10	371	192	584	142	196	251	397	563	995	1341	2563	2457
ENSG00000049247.9	0	0	0	0	4	6	5	21	8	1	5	4
ENSG00000049249.4	37	67	415	136	828	358	465	893	2355	1604	1116	1542
ENSG00000049283.13	5	3	128	11	90	58	129	133	18	2	14	29
ENSG00000049319.2	10	8	9	6	18	2	10	20	2	0	1	0
ENSG00000049323.11	5803	7684	364	6393	226	251	859	1494	413	803	422	407
ENSG00000049449.4	5273	6693	9966	8094	13664	11202	24537	17129	19001	10792	10153	11595
ENSG00000049540.12	357	511	9	361	15	1	1	4	0	3	1	3
ENSG00000049541.6	459	379	744	420	711	1169	2272	875	905	1843	1681	2337
ENSG00000049618.17	2461	1814	2400	1560	548	643	1305	1131	1774	1886	1349	1651
ENSG00000049656.9	5936	4616	5987	4480	5889	5709	11140	10681	5750	6511	3097	4069
ENSG00000049759.12	3801	2289	8387	2300	2232	1076	1798	2384	6427	2744	3021	3168
ENSG00000049768.10	2	0	0	2	0	0	2	7	2	5	0	0
ENSG00000049769.8	129	137	86	126	80	86	126	268	181	431	421	438
ENSG00000049860.9	5059	3967	5056	3278	3234	4246	6011	5697	3337	3405	2546	3087
ENSG00000049883.10	410	405	497	396	105	207	443	691	122	217	277	284
ENSG00000050030.9	74	37	108	26	1	1	1	0	1	0	0	0
ENSG00000050130.13	2524	2468	3404	2003	1301	1446	2527	1831	1557	953	1164	1572
ENSG00000050165.13	10018	6540	11558	8544	2523	1702	3958	4259	1559	2121	2850	2873
ENSG00000050327.10	368	242	793	266	450	610	1486	969	780	598	1392	1241
ENSG00000050344.8	2722	1991	4518	1954	2625	2459	4880	1774	2121	3540	1610	2109
ENSG00000050393.7	996	794	1527	861	431	549	826	787	862	1001	787	915
ENSG00000050405.9	6745	7646	9448	8656	8629	6353	12352	16283	2262	2052	1301	1190
ENSG00000050426.11	1127	741	963	738	539	851	1242	1206	1179	2005	2355	2290
ENSG00000050438.12	359	292	228	246	12	21	75	20	79	7	16	21
ENSG00000050555.13	3	0	1	6	36	36	33	26	1	1	1	2
ENSG00000050628.16	30	20	13	7	12	1	8	3	3	0	1	0
ENSG00000050730.11	14	7	57	12	846	869	862	450	12	6	3	6
ENSG00000050748.13	1799	1171	1958	1178	939	1129	1904	1403	2490	2544	1615	2131
ENSG00000050767.11	3	0	4	1	0	0	0	0	0	0	10	8
ENSG00000050820.12	4561	4658	5082	3632	4279	2697	5133	10471	4077	1856	1682	2482
ENSG00000051009.6	971	496	1082	637	324	533	678	571	864	1081	904	1042
ENSG00000051108.10	4892	5372	5457	5230	2671	2278	4459	4018	3487	5507	5126	4955
ENSG00000051128.14	2095	987	1777	1130	1465	783	1983	1395	2221	1321	1748	2011
ENSG00000051180.12	91	66	80	48	70	257	598	78	206	458	376	589
ENSG00000051341.9	132	30	109	33	445	1541	3299	952	535	1224	1182	1321
ENSG00000051382.4	712	335	834	353	429	467	801	801	820	727	849	839
ENSG00000051523.6	6105	7460	11647	5643	9943	4351	6841	6930	12037	7037	10122	12399
ENSG00000051596.5	315	261	385	260	332	435	625	307	598	913	1038	1022
ENSG00000051620.6	3181	2047	3799	2081	960	466	1111	1344	1787	921	1593	1675
ENSG00000051825.10	772	934	1422	839	1026	1565	3366	1477	1500	2235	3058	3600
ENSG00000052126.10	1894	2010	3939	1524	1715	1620	2867	2694	2803	2259	3220	4789
ENSG00000052344.11	10	7	20	6	31	9	19	60	3	1	12	3
ENSG00000052723.7	3812	2416	2565	1692	2721	696	3985	2172	4670	1095	3394	3208
ENSG00000052749.9	2043	1720	2830	1875	1599	2460	2820	3209	3106	4647	2319	2020
ENSG00000052795.8	5726	2586	5059	3418	2065	2479	3776	4152	1231	1489	1548	1723
ENSG00000052802.8	1868	1820	3005	2071	3006	1916	2762	1221	7772	2265	2863	3352
ENSG00000052841.10	4939	3049	4101	2980	1681	1935	3529	3405	3990	4548	4143	4441
ENSG00000052850.5	1	1	0	0	0	0	0	0	1	0	0	0
ENSG00000053108.12	0	0	1	2	8	13	11	4	0	1	1	0
ENSG00000053254.11	5320	3538	3927	2923	1236	508	2127	2651	3774	1205	1740	1723
ENSG00000053328.8	15	20	10	12	1	0	0	1	0	0	0	0
ENSG00000053371.8	1580	1427	2340	1554	227	318	606	357	2072	2677	4511	4488
ENSG00000053372.4	1553	1322	1810	1284	840	1261	1849	1232	2837	2568	2228	2258
ENSG00000053438.7	45	36	6	21	1	0	0	0	0	0	0	0
ENSG00000053501.8	507	541	405	466	166	117	198	312	383	324	682	629
ENSG00000053524.7	217	92	174	100	41	14	56	45	51	52	78	32
ENSG00000053702.10	0	0	2	0	0	0	0	0	0	0	1	0
ENSG00000053747.11	1488	1331	6076	1043	4143	5012	9060	6319	9531	11169	18647	21773
ENSG00000053770.7	3340	1929	2868	1668	894	1073	1632	950	1003	704	511	694
ENSG00000053900.6	1246	739	1353	817	364	576	1056	729	789	895	790	968
ENSG00000053918.11	0	1	1	0	16	20	70	87	1	0	2	0
ENSG00000054116.7	3389	2412	3018	2471	2456	1849	2652	2394	3192	2148	1494	1625
ENSG00000054118.9	10413	5605	11011	6006	4050	4089	8164	7125	8460	7649	5123	6657
ENSG00000054148.13	4369	6011	4667	3764	3114	1438	2235	2848	5108	4270	10105	9812
ENSG00000054179.7	0	0	1	0	0	0	0	0	0	2	4	0
ENSG00000054219.9	2	2	3	3	449	483	1334	672	0	0	0	0
ENSG00000054267.16	3503	2468	3774	2228	1877	1676	3053	2809	3830	2379	2411	2903
ENSG00000054277.8	2221	1211	842	1020	406	2018	2119	1993	971	3503	5399	5547
ENSG00000054282.11	1921	1378	1284	1460	605	746	1104	1036	1201	1635	1127	1132
ENSG00000054356.9	46	63	143	58	1235	1125	1292	1571	1	2	1	0
ENSG00000054392.8	462	1044	1660	863	373	435	435	427	1343	1119	523	510
ENSG00000054523.12	5557	3721	6216	3299	1863	1675	2520	1983	5059	4880	3984	4169
ENSG00000054598.5	602	441	1183	417	179	446	607	375	200	257	170	206
ENSG00000054611.9	1139	719	1163	778	303	497	765	763	1392	1458	1279	1528
ENSG00000054654.11	5018	3174	18024	3253	577	1507	3534	1883	1399	2897	3648	5212
ENSG00000054690.9	250	135	620	139	50	43	63	62	83	207	180	190
ENSG00000054793.9	4224	2930	5659	2779	330	177	387	809	1557	2102	2150	2730
ENSG00000054796.8	0	0	0	0	0	0	0	0	0	0	0	0
ENSG00000054803.3	1	2	1	2	0	0	0	0	0	0	0	0
ENSG00000054938.11	0	0	0	1	0	0	0	0	0	0	2	0
ENSG00000054965.6	2541	1927	2807	1917	748	592	1281	938	2464	2133	3461	3407
ENSG00000054967.8	361	310	1557	315	245	181	298	293	559	528	392	388
ENSG00000054983.12	437	584	694	423	1	0	0	0	0	0	0	1
ENSG00000055044.6	2883	2280	3737	2343	2641	2625	5772	5370	3547	2535	2278	2587
ENSG00000055070.12	6867	5188	7637	4521	2667	1382	3554	2206	5564	2937	4176	5394
ENSG00000055118.10	2	3	2	2	1	0	0	2	270	120	174	253
ENSG00000055130.11	3469	2504	3489	2464	4940	4310	7906	4782	6970	4736	3729	4539
ENSG00000055147.13	1683	1055	1256	1047	507	314	756	1004	1401	867	973	993
ENSG00000055163.14	2171	2343	3222	1801	1619	1266	1422	1874	3441	2903	2180	2372
ENSG00000055208.13	2325	2399	3597	2058	2145	1229	3142	3924	2946	1658	2290	2402
ENSG00000055211.8	3041	1537	2882	1597	997	665	938	906	2368	1905	1288	2407
ENSG00000055332.12	4073	3520	4394	3239	2517	4279	10718	4064	5021	5787	5819	6603
ENSG00000055483.15	1686	1159	1931	1191	1071	1078	1964	2633	1438	1960	2011	1660
ENSG00000055609.13	3530	2739	3813	2368	3357	3822	6287	8374	7032	5432	5624	6110
ENSG00000055732.8	38	17	112	16	84	153	249	294	81	134	169	36
ENSG00000055813.5	33	26	60	28	7	3	11	32	4	4	12	12
ENSG00000055917.11	4663	2832	5141	2820	3030	2814	6040	4697	4201	3383	3452	3697
ENSG00000055950.12	1925	1915	2066	1546	992	775	1395	1162	2542	1764	2717	2593
ENSG00000055955.11	4	0	3	3	1	1	1	5	8	5	2	4
ENSG00000055957.6	0	0	0	0	0	0	0	0	1	0	5	2
ENSG00000056050.6	541	471	651	456	345	584	1069	674	364	613	325	461
ENSG00000056097.11	12844	8100	11578	7980	5134	3790	7568	11429	7789	6328	6685	6468
ENSG00000056277.11	306	240	487	203	937	1119	1873	806	523	477	385	375
ENSG00000056291.13	90	61	82	59	0	0	0	0	0	0	0	0
ENSG00000056487.11	1	1	0	0	7	7	25	57	13	19	13	14
ENSG00000056558.6	299	211	222	189	2172	836	1352	4288	709	384	328	431
ENSG00000056586.11	4883	4516	7408	4305	5772	2543	10513	7513	6490	3193	5493	5476
ENSG00000056661.9	266	213	298	252	177	107	207	274	261	251	262	276
ENSG00000056736.5	9	10	15	2	0	0	0	0	1	0	0	0
ENSG00000056972.14	671	719	1833	638	809	617	1119	750	704	565	903	887
ENSG00000056998.14	64	95	44	64	286	118	533	346	2	5	0	2
ENSG00000057019.11	61521	36179	109653	40083	61033	54502	91613	53354	99707	68117	20587	34755
ENSG00000057149.10	5	4	6	8	1	0	0	0	32	0	1	3
ENSG00000057252.8	5847	3644	7803	3767	3586	4480	6184	5936	4336	6581	5169	4974
ENSG00000057294.9	3641	2695	1337	2379	289	545	939	990	157	144	157	204
ENSG00000057468.6	20	16	11	15	10	20	10	18	21	13	20	27
ENSG00000057593.9	2	1	0	0	0	0	0	0	0	0	5	0
ENSG00000057608.12	15985	11570	14930	11275	6710	7380	12936	7218	17964	11380	13196	13752
ENSG00000057657.10	40	27	5	15	76	85	54	205	41	290	147	106
ENSG00000057663.8	1647	1144	1844	1149	796	1144	1467	1507	2114	2666	1619	1955
ENSG00000057704.6	802	705	3732	912	591	252	495	241	408	377	263	203
ENSG00000057757.5	2256	1229	1864	1236	1266	1268	1364	1525	2405	2982	2268	2436
ENSG00000057935.9	1756	1421	2039	1180	973	899	1838	1517	1575	998	1639	1752
ENSG00000058056.4	629	589	1066	505	925	751	2037	561	919	1006	1014	1462
ENSG00000058063.11	4362	3762	4609	3379	2132	3242	4789	3899	5470	5487	4526	4974
ENSG00000058085.10	16770	7531	26850	11654	91	44	47	79	5804	5652	3738	4175
ENSG00000058091.12	3756	1839	1689	1623	373	553	1635	983	844	974	1324	2036
ENSG00000058262.5	24922	18855	18041	16222	15200	8766	20416	13680	16718	10239	11354	10622
ENSG00000058272.11	8220	5113	6908	4766	2576	2802	4410	3380	5255	4994	3355	4760
ENSG00000058335.11	1	0	3	0	6	3	0	2	30	23	44	25
ENSG00000058404.15	42	40	58	35	5	2	5	7	4	2	12	12
ENSG00000058453.12	665	374	460	344	210	90	156	215	1327	766	1068	1245
ENSG00000058600.11	1629	1368	1910	1240	801	1437	2083	2017	1242	1837	988	1194
ENSG00000058668.10	9408	5128	18585	7620	5869	3929	5459	4205	19986	8806	9762	9870
ENSG00000058673.11	11385	6752	9946	6351	4074	4191	8007	9018	10033	9091	8753	8472
ENSG00000058729.6	2194	1574	1569	1440	716	733	1192	1028	631	541	504	710
ENSG00000058799.9	525	1161	1273	1019	1046	780	869	964	2378	1697	1087	1111
ENSG00000058804.10	1485	1002	1548	900	624	1551	2916	732	1599	1537	1243	1762
ENSG00000058866.10	104	54	167	66	606	806	949	495	305	330	161	142
ENSG00000059122.12	3042	2637	3040	2531	3094	2246	3879	3921	2440	2904	3819	3889
ENSG00000059145.14	675	435	760	405	1172	747	1061	465	954	579	826	782
ENSG00000059377.11	267	275	620	251	367	384	828	346	343	480	625	1084
ENSG00000059378.8	1379	926	1854	1025	3323	1523	3374	2445	2120	1898	1978	2382
ENSG00000059573.4	8705	6118	7178	5757	4981	3882	5980	3070	13972	8482	11436	11968
ENSG00000059588.5	957	751	1250	761	786	499	1934	761	1467	1481	1007	1432
ENSG00000059691.7	861	544	1162	717	513	594	1000	928	596	364	409	481
ENSG00000059728.6	784	766	853	541	656	461	1066	3661	593	545	802	779
ENSG00000059758.3	2762	2532	3202	2067	994	1085	2593	2571	1085	1083	1250	1312
ENSG00000059769.15	743	438	542	354	416	472	654	520	611	636	563	672
ENSG00000059804.11	6669	5248	2942	3518	3460	2897	1988	3363	6556	11554	6065	4934
ENSG00000059915.12	78	92	41	51	21	11	34	54	16	11	46	26
ENSG00000060069.12	1567	1037	1648	1057	523	440	546	463	1125	877	344	443
ENSG00000060138.8	6850	5113	6062	4840	4967	4927	6230	7704	8738	8777	12396	12384
ENSG00000060140.4	32	42	98	22	206	292	396	408	338	333	314	162
ENSG00000060237.12	8732	6354	8864	5080	3640	4381	7271	8101	4597	4838	4033	4923
ENSG00000060303.5	0	0	0	0	0	0	0	0	0	0	2	0
ENSG00000060339.9	4777	3453	5418	3643	2281	1931	3957	4002	5146	2457	2461	2586
ENSG00000060491.12	2243	1572	2644	1524	1823	1185	2119	1590	5319	3856	5690	4703
ENSG00000060558.3	0	3	1	3	2	3	0	1	2	0	4	0
ENSG00000060566.9	0	0	0	1	3	7	4	4	3	1	4	1
ENSG00000060642.6	801	876	1274	746	385	304	395	552	1225	1087	1306	1134
ENSG00000060656.15	2971	1698	4886	1797	662	255	413	400	399	554	653	698
ENSG00000060688.8	1817	1681	1733	1517	692	882	1457	1341	2732	2521	1044	1259
ENSG00000060709.9	0	3	1	0	0	0	1	1	0	0	1	0
ENSG00000060718.14	213	438	1004	262	2	4	0	2	33	6	6	3
ENSG00000060749.10	1751	1275	2024	958	717	1301	2515	1554	1373	1384	1930	2035
ENSG00000060762.14	734	340	441	370	187	166	283	244	245	340	156	192
ENSG00000060971.13	2239	1564	2531	1503	879	490	944	554	1689	970	778	1099
ENSG00000060982.10	13413	8381	8318	14041	4808	4348	16674	9059	14567	9849	12437	13495
ENSG00000061273.13	3666	3435	3026	2929	1014	1380	1938	1753	2222	2217	1486	2025
ENSG00000061337.11	257	275	337	224	3	2	15	1	96	82	13	40
ENSG00000061455.10	55	46	22	30	27	22	35	27	10	10	27	21
ENSG00000061492.7	0	0	0	0	1	1	1	1	0	0	1	3
ENSG00000061656.5	168	131	242	120	121	73	233	636	541	601	1566	1122
ENSG00000061676.10	17183	13200	21680	11837	7765	9555	15914	13729	13442	13736	8857	10132
ENSG00000061794.8	3216	2078	3467	2211	1422	1399	3440	2503	2577	1587	1972	2293
ENSG00000061918.8	327	284	1415	323	728	757	1289	1616	647	428	841	1248
ENSG00000061936.5	1543	980	1881	1006	672	868	1483	1476	1716	1918	1636	1794
ENSG00000061938.12	872	708	530	577	687	718	982	970	941	772	748	745
ENSG00000061987.10	3971	1910	2759	1792	1915	1996	3102	2879	3031	2649	3049	3488
ENSG00000062038.9	13	34	28	19	82	101	79	127	0	11	27	6
ENSG00000062096.10	0	0	0	0	1	2	0	0	0	0	0	2
ENSG00000062194.11	3570	2240	3387	1944	1841	1795	3249	3857	2093	1871	2311	2645
ENSG00000062282.10	48	29	67	33	543	175	403	623	684	340	397	385
ENSG00000062370.12	654	428	514	380	166	240	420	286	373	378	321	367
ENSG00000062485.14	4272	3468	5582	3144	2209	3122	4429	2619	5311	3588	2883	3527
ENSG00000062524.11	19	11	16	7	1	5	11	17	0	2	7	2
ENSG00000062582.9	308	319	314	288	289	265	284	484	389	357	588	542
ENSG00000062598.13	2172	2049	2918	1865	1341	799	1216	1149	2709	2657	1007	1256
ENSG00000062650.13	6084	4030	7133	3794	3271	3199	5923	6076	6384	6363	5301	6243
ENSG00000062716.6	16908	9086	13655	8330	3830	4999	10177	9138	14160	16827	13075	18857
ENSG00000062725.5	3377	2048	5082	3223	2317	1552	3578	2436	2352	1484	2876	3386
ENSG00000062822.8	415	447	648	329	277	788	1739	406	433	1083	905	1348
ENSG00000063015.15	1	1	2	0	0	0	1	0	1	0	0	0
ENSG00000063046.13	23618	18797	27255	17726	16013	10995	21953	16160	27017	14323	24118	24623
ENSG00000063127.11	12	8	3	8	20	13	32	30	0	0	0	3
ENSG00000063169.6	65	53	45	33	53	26	48	58	87	59	46	47
ENSG00000063176.11	559	629	527	446	171	203	346	503	274	348	381	336
ENSG00000063177.8	16714	17808	15171	14255	10760	8908	15681	15031	20669	17328	20907	21009
ENSG00000063180.4	168	156	302	150	378	165	383	665	111	35	116	150
ENSG00000063241.3	1553	1388	2033	1287	4146	2469	4845	3483	1714	1128	1232	1294
ENSG00000063244.8	4977	4034	5440	3643	2606	3411	6406	4213	3218	3409	2968	3644
ENSG00000063245.10	2471	1604	2152	1737	2826	2279	3104	2940	3108	2248	2039	2326
ENSG00000063322.9	1945	1327	2250	1130	1622	736	1478	2138	2631	895	1526	1647
ENSG00000063438.12	600	486	691	380	58	124	286	358	17	58	113	94
ENSG00000063515.2	0	0	0	0	0	0	0	0	0	0	0	0
ENSG00000063587.12	917	617	771	597	837	879	1987	706	971	905	1219	1624
ENSG00000063601.12	1849	1401	2357	1321	1497	732	1972	1270	1452	763	889	912
ENSG00000063660.4	9086	7101	5394	6925	4075	7564	7194	10397	2738	4644	3064	3513
ENSG00000063761.11	281	190	209	184	113	161	206	218	105	119	42	94
ENSG00000063854.8	1359	999	1902	1032	1126	598	882	1014	1509	1267	647	958
ENSG00000063978.11	4188	2824	4623	2854	2719	2971	4726	3494	6170	7514	4545	4855
ENSG00000064012.17	782	889	1676	703	2227	2411	3654	3273	2167	2484	2465	2397
ENSG00000064042.13	1940	2490	5547	3233	160	99	252	152	3399	1752	1971	1614
ENSG00000064102.10	2146	1639	1551	1455	497	962	1340	866	1013	1166	785	894
ENSG00000064115.6	5859	3610	4894	3438	2350	5058	5500	5590	1863	4391	3296	4442
ENSG00000064195.7	9	8	10	0	0	0	0	2	0	0	0	0
ENSG00000064199.2	196	140	175	147	157	223	240	162	336	248	100	175
ENSG00000064201.11	0	0	0	0	4	1	1	6	6	0	2	4
ENSG00000064205.6	2	2	0	2	19	17	7	3	38	24	183	32
ENSG00000064218.4	30	9	29	15	5	17	29	70	0	0	0	0
ENSG00000064225.8	540	294	210	191	74	100	146	73	73	58	33	27
ENSG00000064270.8	2	0	4	1	1	0	0	0	1	0	1	0
ENSG00000064300.4	4	9	85	1	3	0	3	0	2	24	18	13
ENSG00000064309.10	303	349	318	238	185	62	181	127	1086	1340	2368	1611
ENSG00000064313.7	2940	2127	2523	1971	1859	2164	3625	6006	4960	3913	3328	3216
ENSG00000064393.11	8174	9251	15133	7843	11718	8166	11925	8305	16255	10754	14468	17998
ENSG00000064419.9	4443	3571	5640	3072	3547	3385	5918	5806	8134	6760	6628	7686
ENSG00000064489.17	3	1	3	0	4	0	1	1	3	0	0	0
ENSG00000064490.9	993	1309	1341	964	949	704	1476	1587	1279	1105	1487	1466
ENSG00000064545.10	703	556	583	516	653	507	707	700	1158	816	803	900
ENSG00000064547.9	66	97	198	76	120	149	210	221	112	210	396	187
ENSG00000064601.12	5509	5663	4687	4316	7167	6559	10547	11192	11266	9093	13592	12154
ENSG00000064607.12	4307	2835	4036	2899	2186	3223	4856	3085	4885	3767	3868	4596
ENSG00000064651.9	3227	2098	5946	1818	747	539	1578	747	1153	857	727	960
ENSG00000064652.6	678	676	1386	662	152	159	462	573	543	449	494	606
ENSG00000064655.14	1	1	0	0	92	71	210	607	1	0	0	0
ENSG00000064666.10	16399	14567	13259	11147	5308	4002	6132	2790	11423	6167	6182	8109
ENSG00000064687.8	727	367	550	336	178	160	233	361	455	450	534	514
ENSG00000064692.14	65	54	29	48	2	2	5	0	1	1	3	0
ENSG00000064703.7	2508	1514	1928	1459	552	764	1190	588	1099	1097	554	811
ENSG00000064726.5	6894	4186	5742	3557	3050	2541	3876	3097	6169	4905	3337	3605
ENSG00000064763.6	384	295	122	233	241	675	978	993	0	4	4	0
ENSG00000064787.8	1	1	9	4	18	3	2	1	9	0	8	1
ENSG00000064835.6	0	0	0	0	0	0	0	0	0	0	0	0
ENSG00000064886.9	6	5	58	3	148	43	61	53	10	7	6	2
ENSG00000064932.11	4176	3357	4922	2571	2739	3293	4324	8529	3925	4301	4436	4378
ENSG00000064933.12	1368	795	1252	886	657	1120	1558	1262	1066	1403	872	907
ENSG00000064961.14	2072	1859	2378	1817	692	997	2339	1438	2391	2112	3066	4002
ENSG00000064989.8	194	127	195	136	131	191	298	264	116	57	30	84
ENSG00000064995.12	1608	1153	1179	942	465	459	496	621	956	958	870	958
ENSG00000064999.12	1232	940	1676	935	380	480	554	407	1211	1114	1049	1126
ENSG00000065000.11	8290	6732	10249	6665	5671	5296	9177	12803	8861	8442	6363	6048
ENSG00000065029.10	697	613	698	559	431	265	447	657	1384	851	885	928
ENSG00000065054.9	1987	1340	931	1210	91	49	106	312	310	233	250	221
ENSG00000065057.3	401	388	412	364	335	234	434	246	321	345	390	517
ENSG00000065060.12	2015	1644	3040	2030	986	1098	2478	2666	5143	4703	3956	4645
ENSG00000065135.7	8259	4653	8198	4696	2336	3309	5309	4927	6077	6385	8038	7090
ENSG00000065150.14	12915	8448	10866	10745	2952	4518	7074	4796	8370	7317	4499	5259
ENSG00000065154.7	7716	5090	6055	4803	3834	3386	5464	2348	9358	5096	4327	4591
ENSG00000065183.11	2790	2316	2328	2411	806	2391	3262	3448	2080	4500	2897	2796
ENSG00000065243.14	3462	2198	4110	1975	1423	1802	3571	3179	3220	3766	3807	4152
ENSG00000065268.6	1477	1558	1625	1368	409	597	900	1324	1137	1590	1396	1610
ENSG00000065308.4	12438	7681	7055	7228	1369	1866	2948	4242	3557	6929	6712	5068
ENSG00000065320.4	106	118	236	90	63	36	62	53	81	52	74	69
ENSG00000065325.8	8	10	9	8	81	89	237	306	105	39	47	41
ENSG00000065328.12	34	13	76	21	198	622	1419	197	249	734	326	701
ENSG00000065357.15	2278	2017	1871	1978	162	242	317	580	237	332	272	351
ENSG00000065361.10	185	49	421	50	9	9	28	23	8	6	10	4
ENSG00000065371.13	1	0	0	0	2	0	4	6	0	0	0	0
ENSG00000065413.12	350	608	1074	402	253	474	1066	818	172	323	256	257
ENSG00000065427.10	5928	5274	6921	5623	3886	3581	5774	4756	6053	5363	4544	6043
ENSG00000065457.6	1110	757	1212	779	482	1086	1511	1161	433	1161	348	537
ENSG00000065485.13	1756	1362	1039	1058	850	750	949	349	2638	2679	3168	3214
ENSG00000065491.8	1201	685	1092	651	706	385	646	1221	1166	816	967	962
ENSG00000065518.7	3121	3049	3622	2561	2423	2123	3375	2562	4485	2592	3514	3573
ENSG00000065526.6	2680	1905	3125	1685	1812	1136	1929	3502	2405	3011	2584	2845
ENSG00000065534.14	17792	15264	35101	13745	8103	2516	16443	7980	11926	2237	7246	10552
ENSG00000065548.13	4497	3353	5512	3100	3158	3944	6288	5395	4714	4133	2776	3044
ENSG00000065559.10	1784	1483	2433	1362	1753	1606	2596	2788	2447	1278	1045	1528
ENSG00000065600.8	952	447	626	557	953	1319	1296	1982	1017	1007	287	376
ENSG00000065609.10	10	6	5	2	0	0	0	0	1	0	0	0
ENSG00000065613.9	4976	2006	6886	3339	3091	2973	5927	5432	3492	3639	4612	5233
ENSG00000065615.9	982	616	1081	532	758	974	1135	868	1438	1067	509	625
ENSG00000065618.12	19	2	20	8	260	121	90	73	393	66	186	110
ENSG00000065621.10	137	182	256	164	57	21	24	96	97	97	65	83
ENSG00000065665.16	371	251	373	208	143	102	159	282	615	262	128	200
ENSG00000065675.10	221	320	1228	293	1	1	1	0	165	186	316	526
ENSG00000065717.10	144	119	23	105	11	13	21	79	31	58	54	62
ENSG00000065802.7	3093	2028	2388	2227	1660	1116	2440	3941	3359	3153	3325	2690
ENSG00000065809.9	2018	1857	6754	1956	885	2084	4096	3848	3716	6097	5674	7818
ENSG00000065833.7	1116	1365	1730	1133	1271	1735	3397	2388	1596	1593	1549	1392
ENSG00000065882.11	3661	4004	5209	3609	1349	1904	2686	1701	4617	4367	3309	3836
ENSG00000065883.10	4170	3296	3835	2858	1465	2329	4267	5324	3240	3937	3293	3632
ENSG00000065911.7	5152	5508	3983	7449	5467	6929	21113	20366	16804	13200	15555	13838
ENSG00000065923.5	2298	1937	1738	2014	505	275	441	383	365	932	1049	1294
ENSG00000065970.4	613	449	684	439	155	430	550	458	353	1032	857	1174
ENSG00000065978.13	21266	18294	20801	16447	6903	8553	16372	9323	21900	16108	14540	18409
ENSG00000065989.11	286	155	146	145	29	30	28	58	171	199	131	129
ENSG00000066027.7	1561	788	1574	770	728	930	1900	1147	966	953	1637	1772
ENSG00000066032.14	7	0	5	3	7	4	13	7	55	15	33	20
ENSG00000066044.9	2615	1756	2445	1702	1144	1295	2326	1173	2431	2184	1549	2073
ENSG00000066056.9	17	18	451	15	0	0	0	0	20	12	13	16
ENSG00000066084.8	4891	3733	5576	2957	2770	2944	4932	6421	3817	2980	3274	3670
ENSG00000066117.10	1574	1512	2869	1340	1387	1352	2160	1675	2555	2193	1103	1642
ENSG00000066135.8	3540	2915	3703	2528	1918	1491	3259	3059	6580	3352	3093	3831
ENSG00000066136.15	1159	1010	1476	993	731	598	1183	1087	768	820	1280	1313
ENSG00000066185.8	18	24	21	25	14	1	3	6	5	2	0	0
ENSG00000066230.6	1	0	1	0	1	0	0	0	1	0	0	0
ENSG00000066248.10	6	11	80	7	64	69	89	508	223	135	537	410
ENSG00000066279.12	724	228	352	244	923	4331	9466	3228	2682	3896	6782	7975
ENSG00000066294.10	0	0	0	0	0	0	0	0	2	0	0	1
ENSG00000066322.8	3800	3313	4495	2723	2192	2364	2959	3047	6321	5136	2961	3253
ENSG00000066336.7	1	2	0	0	0	0	0	0	0	0	0	1
ENSG00000066379.10	559	537	487	421	191	202	286	222	332	427	658	563
ENSG00000066382.12	0	1	0	0	2	0	0	0	0	0	0	0
ENSG00000066405.8	1	0	1	0	0	0	0	0	0	2	0	2
ENSG00000066422.4	3098	1885	2492	1738	1009	1238	1944	1554	1686	1641	1388	1803
ENSG00000066427.17	1638	905	1602	869	273	162	471	366	743	350	692	788
ENSG00000066455.8	4893	3529	4042	3278	2203	1610	2494	1911	2446	2515	2396	2604
ENSG00000066468.16	6	18	25	20	149	289	735	303	349	450	1073	1451
ENSG00000066557.5	1721	720	1264	878	402	471	982	790	1810	1548	1445	1537
ENSG00000066583.7	725	539	651	459	397	340	594	643	471	576	417	467
ENSG00000066629.12	1269	798	2677	818	1134	1905	1750	1102	585	822	313	402
ENSG00000066651.13	631	570	592	464	184	326	495	489	567	779	735	667
ENSG00000066654.8	2745	2319	3933	2204	2167	1348	3897	3463	3485	1853	2315	3391
ENSG00000066697.10	2819	2249	3512	2009	3405	2143	3260	3975	4747	3739	2533	2259
ENSG00000066735.10	5	10	10	1	15	14	27	135	4	3	3	5
ENSG00000066739.7	3202	2399	3600	2057	639	627	1295	1225	1701	1433	1608	2001
ENSG00000066777.4	4438	4353	8652	3563	3154	2830	5533	6451	9429	6342	8815	8705
ENSG00000066813.10	20	11	3	5	0	0	0	0	1	0	3	12
ENSG00000066827.11	871	741	927	582	283	294	417	361	536	411	315	426
ENSG00000066855.11	1299	581	1114	752	897	1254	2152	2525	1796	2212	1843	1971
ENSG00000066923.13	19	11	7	6	1	1	5	8	8	4	57	18
ENSG00000066926.6	1795	1098	2466	1178	787	1297	2136	1732	1469	1250	1319	1492
ENSG00000066933.11	4710	3139	5647	2773	1401	1285	2896	2904	5346	4262	6280	5287
ENSG00000067048.12	1	1	3	0	3	4	0	4	5621	2122	4901	4729
ENSG00000067057.12	7938	6705	13600	7931	10721	10294	19124	24512	45684	42287	62785	56490
ENSG00000067064.6	1906	1198	2042	1298	1333	1074	1940	673	3397	1015	1053	1121
ENSG00000067066.12	7384	4860	5158	4689	2652	2696	5740	3905	1929	3736	4593	4486
ENSG00000067082.10	11962	7231	13974	7410	2548	1484	3101	8992	7094	7032	9223	8560
ENSG00000067113.12	1447	1449	1004	1062	212	201	383	455	228	149	223	326
ENSG00000067141.12	1884	3309	3571	2693	1088	524	1586	701	2257	1580	1602	1784
ENSG00000067167.3	29529	13424	20328	11355	7549	8094	16267	12976	18607	12654	16870	25752
ENSG00000067177.10	608	490	730	461	1438	1270	2437	1518	1346	1193	1463	1515
ENSG00000067182.3	4579	3914	5658	3449	2136	2544	5281	3802	4809	4400	5130	7093
ENSG00000067191.11	251	184	282	203	135	132	359	563	293	373	775	367
ENSG00000067208.10	6244	4565	4407	4170	1608	627	1673	991	3278	1135	1262	1415
ENSG00000067221.9	908	704	1126	743	862	645	753	1802	1142	1006	472	810
ENSG00000067225.13	80680	80491	155400	73823	49806	41360	93441	74842	65394	55266	51425	61242
ENSG00000067248.5	4642	3326	3501	2980	1212	1442	2354	1861	1388	910	536	611
ENSG00000067334.9	4286	3543	5279	3521	2832	2319	4194	3600	3846	3289	2165	2783
ENSG00000067365.10	809	674	522	647	217	346	514	708	396	681	750	914
ENSG00000067369.9	6294	5242	5922	3947	4627	3525	6349	5921	4619	3674	3299	3638
ENSG00000067445.16	1306	1319	814	858	0	0	2	0	372	151	417	423
ENSG00000067533.5	1333	883	1395	1069	516	906	1532	2083	1107	1051	1212	1097
ENSG00000067560.6	26977	19607	19959	18045	8838	7909	13686	8920	16469	12297	11279	13739
ENSG00000067596.6	3073	2627	3677	2423	3573	2218	3883	3473	4091	2707	1572	2112
ENSG00000067601.6	111	89	133	88	109	137	145	139	203	183	205	201
ENSG00000067606.11	606	374	1030	399	300	141	387	533	23	9	29	51
ENSG00000067646.7	4	4	1	1	2	2	1	3	1088	833	633	673
ENSG00000067704.8	5098	4295	7790	4368	4023	4519	7422	6046	9971	6565	5505	6118
ENSG00000067715.9	1243	1127	588	879	68	110	110	319	288	389	403	356
ENSG00000067798.9	5825	5050	2042	5653	2682	5401	5184	4413	1330	4509	843	1176
ENSG00000067829.14	1457	1409	2341	1270	1818	1257	1965	1245	2064	1320	1244	1596
ENSG00000067836.8	730	463	631	403	112	130	218	304	503	367	463	600
ENSG00000067840.8	10	12	18	10	698	510	1057	715	2	1	1	0
ENSG00000067842.13	0	1	1	0	0	0	0	0	3	0	2	0
ENSG00000067900.6	8979	5464	6061	5280	593	1347	2700	2447	1619	3103	3067	3545
ENSG00000067955.9	2245	1478	2303	1287	1163	454	1948	1003	2847	1209	1461	2083
ENSG00000067992.8	156	161	360	176	124	99	175	108	442	463	489	573
ENSG00000068001.9	2090	1886	2698	1739	1045	853	1148	716	1538	834	425	572
ENSG00000068024.12	445	364	829	507	383	810	1486	1507	773	933	865	887
ENSG00000068028.13	1235	982	906	1025	409	342	570	774	826	1136	1282	1089
ENSG00000068078.13	45	41	105	25	74	28	106	66	666	96	462	571
ENSG00000068079.3	443	431	465	407	1049	1091	2607	2836	596	532	929	972
ENSG00000068097.10	1472	1021	1831	1082	650	578	1199	918	933	1450	1504	1472
ENSG00000068120.10	1648	1196	1512	1029	764	1160	1900	1750	1781	1810	1836	2103
ENSG00000068137.10	600	502	501	422	1299	562	930	1207	1251	864	1486	1243
ENSG00000068305.13	3424	2150	3949	1856	741	1194	1832	2153	1512	2995	2183	2233
ENSG00000068308.9	2699	1946	2473	1666	687	568	895	666	2588	2080	1971	2227
ENSG00000068323.12	3205	2503	3501	2252	1144	1084	1591	2549	3237	4787	3025	3160
ENSG00000068354.11	639	445	896	494	98	157	243	229	397	675	803	747
ENSG00000068366.15	6851	5098	10112	4254	5034	8004	12353	6531	5642	6466	3784	4316
ENSG00000068383.14	2092	1549	1429	1331	359	344	492	449	1813	1539	944	1068
ENSG00000068394.9	1125	852	1197	788	275	352	584	418	842	780	686	1025
ENSG00000068400.9	1352	1198	1753	1132	654	499	960	1107	1446	1514	1551	1720
ENSG00000068438.10	3056	2125	3594	2524	622	618	1479	1587	2947	2855	3394	2898
ENSG00000068489.8	240	70	424	105	275	708	1788	643	759	1323	2336	2346
ENSG00000068615.12	12	20	6	19	3	2	4	4	0	0	0	0
ENSG00000068650.14	2415	1420	2821	1425	432	241	739	916	2297	981	1646	2013
ENSG00000068654.11	4372	2893	5532	3586	2815	3866	6258	4721	5540	3989	2368	2707
ENSG00000068697.6	9247	2535	13788	7801	5771	2532	6246	3369	7851	2771	3907	5210
ENSG00000068724.11	977	776	1349	711	2579	1322	2154	2479	1928	1692	1762	1328
ENSG00000068745.10	3837	2876	3861	2094	2808	1492	2178	2131	3371	1845	2166	2498
ENSG00000068781.16	5	14	2	7	2	0	0	3	0	0	0	0
ENSG00000068784.8	1807	1240	1776	1249	416	440	899	834	971	1153	587	789
ENSG00000068793.13	9802	7046	11897	6601	4804	4547	6843	5816	14658	9091	7599	9508
ENSG00000068796.12	2645	1748	2780	1668	909	1136	1855	1790	1268	1549	1202	1312
ENSG00000068831.14	49	51	0	45	2	1	2	3	4	0	5	0
ENSG00000068878.10	2649	3347	4312	2632	1973	2357	3245	2359	3029	2790	1344	1518
ENSG00000068885.10	814	491	611	440	371	696	1042	677	1229	1151	1120	1484
ENSG00000068903.15	2090	1365	2410	1418	1035	749	1290	1731	1479	1113	2155	1931
ENSG00000068912.9	5587	2967	3989	3206	2474	3106	4035	1853	3710	3316	2857	3144
ENSG00000068971.9	1400	1072	1457	1083	397	201	338	1180	959	851	471	456
ENSG00000068976.9	8	18	9	13	15	8	8	14	8	12	18	5
ENSG00000068985.4	0	0	0	0	0	0	0	0	0	0	0	0
ENSG00000069011.11	3	8	0	2	151	268	494	429	286	333	391	548
ENSG00000069018.13	2	2	1	1	0	0	0	0	2	0	0	11
ENSG00000069020.14	1685	1036	1339	868	316	345	367	288	183	325	207	273
ENSG00000069122.14	302	362	218	426	2	0	1	0	5	0	4	0
ENSG00000069188.12	26	16	10	13	48	32	42	28	58	14	9	6
ENSG00000069206.11	1	0	3	0	0	1	0	1	0	0	0	3
ENSG00000069248.9	4002	2954	3780	2423	1408	1636	2696	1894	4001	2942	2499	2866
ENSG00000069275.12	14629	7847	13067	8257	2958	7419	18646	11007	5195	13401	13555	19088
ENSG00000069329.11	10518	7184	12294	7166	3944	2576	7482	7388	10968	5270	8599	9769
ENSG00000069345.7	3304	3877	5562	3503	2106	2362	4124	3832	3261	2694	2872	3778
ENSG00000069399.8	219	162	237	122	289	185	213	462	335	207	346	592
ENSG00000069424.10	98	56	142	33	95	266	625	240	164	407	481	571
ENSG00000069431.6	459	282	24	130	67	191	35	40	861	1323	317	489
ENSG00000069482.6	16	12	6	12	0	0	0	0	0	0	0	0
ENSG00000069493.10	93	45	89	39	92	107	295	106	111	272	382	231
ENSG00000069509.5	672	552	730	488	267	173	459	503	383	160	449	400
ENSG00000069535.12	73	50	123	27	0	0	0	0	28	10	26	156
ENSG00000069667.11	867	379	367	311	8	12	25	42	0	5	3	0
ENSG00000069696.6	0	5	1	0	2	1	1	4	8	19	36	34
ENSG00000069702.6	503	255	750	223	215	343	394	117	65	61	74	45
ENSG00000069712.9	502	232	366	154	67	115	185	144	183	195	217	157
ENSG00000069764.5	0	0	0	0	0	1	0	4	0	0	0	0
ENSG00000069812.7	192	43	225	85	1	0	2	3	3	6	36	12
ENSG00000069849.6	5201	4622	4679	4038	2013	2033	3313	2061	2708	2536	1279	2063
ENSG00000069869.11	2753	2113	3102	1823	9517	7865	13631	14669	8134	5304	2906	2957
ENSG00000069943.5	496	389	543	294	252	499	802	678	612	462	756	612
ENSG00000069956.7	4801	4444	5754	3352	5212	4245	6185	9630	7154	4965	4445	3904
ENSG00000069966.14	1769	1201	2232	1103	965	857	1506	1495	2127	3176	1830	1669
ENSG00000069974.11	448	229	313	205	271	467	749	428	444	771	1058	948
ENSG00000069998.8	827	640	807	626	381	505	836	447	1387	1115	933	1093
ENSG00000070010.14	2403	2270	2670	1967	1196	1114	1785	732	2021	1551	689	905
ENSG00000070018.4	3366	3084	3767	2184	1517	1107	2914	1629	2551	1511	2390	2895
ENSG00000070019.3	0	1	2	0	6	1	6	1	2	2	1	0
ENSG00000070031.3	0	0	0	0	0	0	0	0	0	1	1	0
ENSG00000070047.7	2481	2069	3569	1900	2144	1766	2740	2036	3362	2409	1836	2280
ENSG00000070061.10	4139	2395	3410	2540	1216	2062	2860	2256	4067	3378	3159	3545
ENSG00000070081.11	2036	1296	1406	1188	1026	1209	1906	1317	1700	2101	3565	4665
ENSG00000070087.9	5286	3831	5916	3296	3182	5326	8206	4882	5283	6308	4101	5404
ENSG00000070159.9	1904	1388	4141	1365	2752	1329	2843	1675	4987	2268	2382	4364
ENSG00000070182.13	2	3	5	0	13	8	4	2	12	9	3	0
ENSG00000070190.8	1	6	26	0	12	2	4	0	1	3	0	3
ENSG00000070193.4	0	0	1	0	0	0	0	0	0	0	0	0
ENSG00000070214.11	2677	2490	3015	1784	504	1730	5768	3154	1145	2441	6303	7820
ENSG00000070269.9	1139	930	1195	713	299	425	532	405	630	513	393	535
ENSG00000070366.9	2506	2017	2439	1932	1093	743	1168	1888	1897	1289	1891	1828
ENSG00000070367.11	6845	3380	5095	3257	961	1162	3323	1889	1202	1339	1521	2027
ENSG00000070371.11	1257	1337	1118	1407	218	177	586	441	4175	5554	5700	5047
ENSG00000070388.7	0	1	0	0	0	0	0	0	3	1	3	1
ENSG00000070404.5	8484	7413	6626	8232	2670	1115	3141	8382	8228	4213	17093	10004
ENSG00000070413.14	3154	2359	5473	2761	1012	1645	2073	2051	6291	4413	3467	4891
ENSG00000070423.13	943	816	1140	822	717	659	1031	715	1798	1536	1285	1352
ENSG00000070444.10	465	390	444	348	512	397	544	632	860	731	898	1015
ENSG00000070476.10	1325	872	1277	910	533	598	1035	1057	1156	1211	1257	1320
ENSG00000070495.10	1133	1091	1260	874	1372	953	1590	2103	1352	1387	1955	1429
ENSG00000070501.7	890	692	695	604	268	282	575	488	368	393	414	389
ENSG00000070526.10	2	0	16	1	1	0	0	0	0	0	0	0
ENSG00000070540.8	2313	2435	2440	1803	2012	1294	1591	1050	3072	2681	1219	1127
ENSG00000070601.5	4	0	13	4	0	0	0	0	0	0	0	0
ENSG00000070610.10	1475	1139	1907	955	948	1543	1482	1746	1582	1566	564	724
ENSG00000070614.10	12396	10631	15310	9074	5300	4261	5982	6674	25629	15924	21922	19509
ENSG00000070669.12	2979	4768	1971	5817	2119	4586	10900	15030	8712	11291	8805	9992
ENSG00000070718.7	1710	1005	1239	1064	708	920	1755	1320	1049	2003	955	1195
ENSG00000070729.9	1	0	0	0	14	3	6	12	1	1	1	5
ENSG00000070731.5	93	27	145	53	88	29	69	101	9	6	7	11
ENSG00000070748.13	0	0	0	0	0	0	0	0	2	2	23	1
ENSG00000070756.9	14735	12758	11504	9868	11842	11098	16740	16857	37385	25186	21322	23812
ENSG00000070759.12	198	83	80	63	43	28	74	15	61	62	204	152
ENSG00000070761.3	1152	1117	1338	997	872	719	1168	1250	1235	1184	1072	1296
ENSG00000070770.4	1847	1933	3133	1682	1445	1676	2886	3244	3509	3659	2527	3403
ENSG00000070778.8	3065	1827	2054	1505	567	383	694	787	1383	973	618	616
ENSG00000070785.12	1046	819	931	917	351	485	716	714	814	996	463	560
ENSG00000070808.11	3	2	10	2	0	0	0	0	3	1	1	1
ENSG00000070814.13	1803	1284	2291	1321	855	1956	3985	1782	3457	4577	1957	2608
ENSG00000070831.11	16494	12287	17701	11360	6028	5235	8456	7882	15956	11796	9735	11435
ENSG00000070882.8	4138	2999	6132	2794	3254	3961	7175	5854	3644	4251	2347	2558
ENSG00000070886.6	0	0	0	0	0	0	0	0	2	0	0	0
ENSG00000070915.5	0	5	7	1	24	6	43	15	0	1	7	6
ENSG00000070950.5	980	654	841	647	209	958	1573	970	343	1045	882	969
ENSG00000070961.10	4802	3864	4147	3093	5025	2493	4879	5400	5987	5815	3267	3282
ENSG00000070985.9	0	1	0	0	0	0	1	2	0	0	0	0
ENSG00000071051.9	2593	2153	4110	1575	1132	773	1372	1258	2406	2483	1278	1560
ENSG00000071054.11	22081	15490	28325	15210	11338	6823	12713	10091	20289	13888	10179	11043
ENSG00000071073.8	262	326	826	296	558	149	282	392	251	141	390	206
ENSG00000071082.6	24044	25771	23322	19678	15917	14564	24721	17357	31519	23500	30009	31994
ENSG00000071127.12	32637	27437	28256	26407	9046	7619	14802	17097	27483	15946	11268	14613
ENSG00000071189.17	2799	1734	3007	1879	2326	2308	4021	3009	3789	2413	2804	3160
ENSG00000071203.5	2	6	3	2	0	0	0	0	0	0	0	0
ENSG00000071205.7	1778	1382	859	1404	673	637	929	786	647	785	693	829
ENSG00000071242.7	4369	2309	5176	3116	466	546	1137	1704	302	811	335	477
ENSG00000071243.11	593	417	752	409	414	669	974	814	737	710	553	691
ENSG00000071246.6	740	341	238	326	2	1	0	6	149	134	217	144
ENSG00000071282.7	1539	2066	724	1704	277	211	419	222	826	631	583	652
ENSG00000071462.7	1884	1417	1678	1317	2094	2008	3307	4299	4583	3378	1666	2723
ENSG00000071537.9	9593	6246	7866	6387	2506	2924	4390	2833	4471	5822	4550	4808
ENSG00000071539.9	213	142	272	168	504	1137	1926	822	1732	2440	1499	1914
ENSG00000071553.12	4098	3656	4601	2848	4982	2688	4554	4041	7206	3633	4296	5135
ENSG00000071564.10	1792	2170	1950	1760	1182	1277	2476	1944	6036	4941	4286	4679
ENSG00000071575.7	1007	1320	542	840	72	74	222	89	32	72	137	49
ENSG00000071626.12	2496	1957	3249	2122	1989	2211	3969	3502	3543	4198	2882	3542
ENSG00000071655.13	2634	2417	2496	2141	1712	1566	2763	2744	4006	3266	1849	2531
ENSG00000071677.1	0	0	0	0	0	0	0	0	0	0	0	0
ENSG00000071794.11	2438	1759	3579	1895	1958	2209	5882	2703	7900	5465	6028	8092
ENSG00000071859.10	3732	3370	3286	2704	2885	2379	4181	4572	4590	3555	2813	3050
ENSG00000071889.12	1009	682	987	745	731	924	1196	1564	1433	1500	1461	1632
ENSG00000071894.10	2379	1907	2030	1526	847	901	1259	1300	3399	3223	3359	3356
ENSG00000071909.14	1	2	3	4	11	7	5	4	10	1	0	0
ENSG00000071967.7	8518	7453	7001	7497	10	7	6	4	6	4	7	2
ENSG00000071991.4	0	1	3	0	0	0	0	0	0	0	0	0
ENSG00000071994.6	2991	2389	2711	2042	924	972	1526	1254	2846	2165	1199	1521
ENSG00000072041.12	309	210	47	174	1	1	0	2	0	0	0	0
ENSG00000072042.8	3883	3105	4252	2962	1989	1338	3343	2495	2484	972	962	1544
ENSG00000072062.9	557	507	563	446	286	259	357	360	458	387	315	424
ENSG00000072071.12	675	464	441	491	524	595	982	1809	401	383	133	194
ENSG00000072080.6	0	0	0	0	0	1	0	0	0	2	2	0
ENSG00000072110.9	35960	27922	30330	27680	7449	5861	10742	8526	10291	7585	7274	8654
ENSG00000072121.11	2745	2047	3573	2149	742	1032	1527	1291	1045	1024	989	1028
ENSG00000072133.6	235	257	137	179	2	3	6	0	0	0	0	0
ENSG00000072134.11	1682	1267	1684	1465	905	809	1441	1664	411	673	723	656
ENSG00000072135.8	988	608	1247	659	456	676	1222	612	1276	1253	1442	1748
ENSG00000072163.14	619	520	165	412	5	1	14	34	35	37	92	96
ENSG00000072182.8	1	0	1	1	27	1	6	13	19	7	71	27
ENSG00000072195.10	755	920	1264	710	1374	998	1747	2171	26	5	24	29
ENSG00000072201.9	17	4	3	18	129	176	193	197	48	96	134	141
ENSG00000072210.14	1291	1158	1578	965	2682	4734	5541	3442	746	1306	909	1214
ENSG00000072274.8	13307	10321	13296	8481	13644	25068	29903	14172	17651	9721	2635	3517
ENSG00000072310.12	1421	951	1600	1325	1526	1466	4646	4872	2106	1702	2088	2534
ENSG00000072315.3	0	0	0	0	0	1	1	0	0	0	1	0
ENSG00000072364.8	14443	9463	16636	8991	6809	4277	9231	11324	12865	6320	9320	9145
ENSG00000072401.10	945	551	912	442	357	511	800	345	740	592	296	383
ENSG00000072415.4	2861	1740	3170	1457	1109	1611	2435	1332	1063	1111	1236	1510
ENSG00000072422.12	877	961	995	833	1585	763	1100	466	2811	1555	1992	2277
ENSG00000072444.10	0	0	0	0	0	1	0	0	0	0	0	0
ENSG00000072501.13	4089	1336	4352	2726	1493	2062	4368	1792	3275	3630	1861	3269
ENSG00000072506.8	2583	2490	2121	1824	1312	1083	1422	1484	3375	1741	936	1710
ENSG00000072518.16	1312	704	1526	804	659	563	875	1068	1605	1019	586	703
ENSG00000072571.15	176	33	172	44	267	1039	2440	847	1592	1762	2675	3289
ENSG00000072609.13	1802	1101	2222	984	509	709	1337	2207	11	12	118	104
ENSG00000072657.4	1091	576	1850	513	3	0	1	0	30	2	8	9
ENSG00000072682.14	11065	7959	7515	7177	6714	2823	4028	5924	14098	9876	13377	11529
ENSG00000072694.14	0	1	0	2	0	0	0	0	0	0	0	0
ENSG00000072736.14	1854	1728	1206	1316	920	880	1541	1025	915	1391	1243	1605
ENSG00000072756.12	1170	795	1064	761	307	537	949	872	718	763	375	441
ENSG00000072778.15	8827	6330	16607	6770	1853	4356	6581	9082	3326	6794	8076	8392
ENSG00000072786.8	3792	2624	3550	2585	1994	1600	2171	2012	2313	2707	2065	1444
ENSG00000072803.13	5194	3944	4769	3983	1492	2169	3532	3072	2398	3346	3101	3573
ENSG00000072818.7	50	65	54	47	50	18	55	112	182	183	311	255
ENSG00000072832.10	570	706	1220	671	1	4	0	0	1	0	1	1
ENSG00000072840.8	4201	2606	5861	2783	4481	2664	4692	7511	8533	5781	10444	9461
ENSG00000072849.6	2170	1696	2569	1582	905	753	1554	2073	1653	1149	1233	1381
ENSG00000072858.6	2	1	0	0	0	1	1	1	0	0	0	2
ENSG00000072864.8	1017	596	896	531	667	825	1502	1012	917	1380	1630	2122
ENSG00000072952.14	1851	1913	81	1834	5	10	11	29	3	5	2	6
ENSG00000072954.2	256	152	208	138	81	45	164	246	103	65	204	218
ENSG00000072958.4	3300	1773	3276	2060	1723	1336	1977	1507	3796	3593	2799	2938
ENSG00000073008.10	13196	6363	7794	6959	2820	3106	6608	9342	6211	5476	13835	11393
ENSG00000073009.8	256	199	252	188	492	458	870	528	275	247	180	264
ENSG00000073050.7	916	680	1012	565	359	427	825	424	474	1030	992	1100
ENSG00000073060.11	825	844	830	683	1591	1419	2209	2520	5464	8225	11280	12274
ENSG00000073067.9	0	0	1	0	7	2	2	4	1	0	0	0
ENSG00000073111.9	788	553	1446	612	1370	2590	5605	1906	1697	3349	2850	4679
ENSG00000073146.11	82	54	134	51	8	4	8	75	2	8	1	1
ENSG00000073150.9	22	50	21	13	269	429	401	375	126	337	283	161
ENSG00000073169.9	764	611	854	641	577	370	654	285	953	576	646	833
ENSG00000073282.8	0	0	2	0	2	7	14	20	2	0	4	3
ENSG00000073331.13	761	619	570	475	497	916	1134	1393	1101	2207	2551	2349
ENSG00000073350.9	172	123	448	176	137	228	298	390	801	656	1313	1359
ENSG00000073417.10	1483	809	1263	895	1188	839	1519	1512	2729	2351	1876	2481
ENSG00000073464.7	568	406	571	469	575	186	504	558	984	422	304	317
ENSG00000073536.13	672	526	840	608	376	476	913	1160	1179	1099	1463	1131
ENSG00000073578.12	5258	3821	8575	3897	3549	2583	5377	5625	11397	10120	11265	11888
ENSG00000073584.14	3583	2050	4178	2104	1752	2149	3770	2162	4302	2319	2979	4260
ENSG00000073598.5	0	1	1	0	0	1	2	0	0	0	0	0
ENSG00000073605.14	278	207	85	161	376	143	427	281	897	763	2053	1277
ENSG00000073614.7	7444	4849	6534	3997	3787	4022	6083	4002	4870	4568	4272	4911
ENSG00000073670.9	7	12	13	5	27	17	69	72	29	22	156	52
ENSG00000073711.6	1594	1327	5003	1204	1036	1179	2452	1727	2884	2144	2485	3509
ENSG00000073712.9	10557	11098	5464	9202	2259	1534	2610	4665	2995	2283	1940	2204
ENSG00000073734.8	10	0	0	10	3	0	0	0	1	0	1	1
ENSG00000073737.12	3	1	5	11	14	8	2	1	19	3	10	21
ENSG00000073754.5	0	0	0	1	19	8	13	9	14	4	8	4
ENSG00000073756.7	2797	2018	206	2390	85	60	147	108	8	18	15	15
ENSG00000073792.11	2881	2006	2549	1885	2507	1065	1567	1099	4764	2938	2284	2532
ENSG00000073803.9	1021	629	1114	811	467	824	770	789	1167	1133	953	1337
ENSG00000073849.10	1040	1267	1673	1286	224	159	615	431	5	6	27	14
ENSG00000073861.2	1	1	1	0	0	0	0	0	1	0	0	0
ENSG00000073905.8	11	14	18	23	41	17	26	19	56	34	22	23
ENSG00000073910.15	980	1149	636	1053	19	19	47	74	147	195	136	128
ENSG00000073921.13	13666	10509	15477	10159	3001	2223	4304	4852	9426	5270	5236	7044
ENSG00000073969.14	1746	1357	2076	1768	747	790	1326	1110	934	780	806	947
ENSG00000074047.16	574	874	334	546	11	11	66	30	200	220	156	161
ENSG00000074054.13	5503	3747	7213	3758	1580	1859	4460	4264	3851	4486	4490	4856
ENSG00000074071.9	1979	2004	2424	1685	1568	1414	2808	1222	2262	1996	2220	2685
ENSG00000074181.4	2419	1972	78	2212	4	11	27	36	0	0	0	2
ENSG00000074201.4	2604	2408	2531	2037	1483	1582	2166	1433	3986	2738	2296	2685
ENSG00000074211.9	11	12	16	10	851	1501	1822	1967	3	16	5	4
ENSG00000074219.9	1409	860	1524	1051	1151	856	1717	887	6	1	2	0
ENSG00000074266.13	776	583	699	543	262	303	488	267	470	668	540	648
ENSG00000074276.6	0	2	0	0	9	4	14	19	1	0	0	1
ENSG00000074317.6	0	0	0	0	0	0	0	0	0	0	0	0
ENSG00000074319.8	2262	2318	3116	2153	1286	1149	1596	2725	2516	2279	1378	1567
ENSG00000074356.12	2488	1530	2372	1417	724	643	1255	1057	2067	1760	1994	2090
ENSG00000074370.13	35	22	24	26	50	49	129	300	1	0	2	1
ENSG00000074410.9	1695	2116	17157	2358	14445	11379	20708	21935	12982	24231	33043	29779
ENSG00000074416.9	3665	3981	12784	5157	4467	5291	13078	16782	5737	7535	13789	15169
ENSG00000074527.7	16298	16449	2589	14872	879	1273	1716	1374	976	1028	815	972
ENSG00000074582.8	707	645	1027	805	295	486	648	779	771	1126	1211	1028
ENSG00000074590.9	6056	4100	3650	4042	1388	904	1580	659	3453	3058	2129	1897
ENSG00000074603.14	3648	2694	4002	2150	1524	1382	2710	1708	3080	2192	1625	1761
ENSG00000074621.9	830	548	1000	511	208	338	537	514	604	848	823	865
ENSG00000074657.9	2092	3299	2537	2336	1024	1280	2936	2841	1691	1772	1393	1442
ENSG00000074660.11	30	23	45	18	70	33	52	71	54	21	45	24
ENSG00000074695.5	12309	5468	8391	7125	6657	4641	11438	4967	22355	11340	26452	24601
ENSG00000074696.8	6963	4400	9238	4834	3761	4267	7509	4484	7836	6026	5024	5813
ENSG00000074706.9	24	26	313	23	2	3	12	15	5	2	5	22
ENSG00000074755.10	3693	2991	4057	2224	1829	2060	2858	3957	2588	2354	1510	1496
ENSG00000074771.3	1	0	2	0	0	0	0	0	0	0	0	0
ENSG00000074800.9	54592	50465	90469	52527	20687	34607	71489	65152	34107	70371	53061	66581
ENSG00000074803.13	0	0	1	0	2	0	0	0	0	0	0	0
ENSG00000074842.3	4260	3872	2671	3585	1944	1771	2213	1810	4872	4714	5311	5146
ENSG00000074855.6	254	165	314	201	174	163	294	504	439	622	892	701
ENSG00000074935.9	756	473	536	568	307	402	1029	1456	660	1050	877	733
ENSG00000074964.12	979	793	1540	767	983	587	1012	1351	1624	1276	1270	1609
ENSG00000074966.6	143	33	568	60	90	156	348	196	31	16	37	23
ENSG00000075035.5	0	0	3	1	1	0	0	3	0	0	2	0
ENSG00000075043.13	1	0	0	0	0	3	17	11	1	0	0	3
ENSG00000075073.10	9	2	6	1	1	0	2	2	2	0	1	0
ENSG00000075089.5	1027	547	796	584	278	510	946	786	570	449	695	926
ENSG00000075131.5	217	137	222	188	90	215	383	235	281	385	421	419
ENSG00000075142.9	2751	2086	3383	2264	3213	2954	5249	3182	4766	4106	4180	6038
ENSG00000075151.15	7067	5014	6283	4528	1367	1341	2322	3495	5773	4060	2790	3265
ENSG00000075188.4	801	588	777	563	366	735	1204	1085	923	1394	917	988
ENSG00000075213.6	1586	782	1549	656	495	1214	1381	300	1020	877	269	785
ENSG00000075218.14	53	20	48	33	124	319	952	406	482	777	789	966
ENSG00000075223.9	40522	21107	25710	18783	10439	2870	7878	4240	5983	7052	4370	5643
ENSG00000075234.12	871	497	1048	579	1586	722	1577	1155	1792	466	914	833
ENSG00000075239.9	1758	1242	2519	1125	1018	1140	1788	1697	4088	2752	2484	2851
ENSG00000075240.12	625	522	757	514	528	511	882	987	1922	1989	3451	2792
ENSG00000075275.12	2639	1823	4155	2111	1882	2070	3795	7311	5540	9116	11171	12587
ENSG00000075290.7	0	0	0	0	0	0	0	0	0	0	0	0
ENSG00000075292.14	7744	5426	8358	5245	3715	3778	7384	6224	5663	5775	5690	6584
ENSG00000075303.8	495	188	454	192	298	354	1123	291	1035	1173	1592	1849
ENSG00000075336.7	870	624	705	573	306	354	520	234	368	512	512	526
ENSG00000075340.18	26	17	8	8	548	1590	2931	1297	0	0	2	6
ENSG00000075388.2	0	0	0	0	0	0	0	0	0	0	0	0
ENSG00000075391.12	3566	2425	4061	2188	1182	2580	2489	4277	3944	4303	2699	2631
ENSG00000075399.8	608	478	627	413	501	401	663	889	630	479	435	534
ENSG00000075407.13	2866	1846	2327	1844	1136	908	2811	2597	2320	1638	2301	2308
ENSG00000075413.13	4102	3581	4518	2858	1748	1156	2246	2614	3334	2529	1680	2206
ENSG00000075415.8	17192	14367	19027	12562	7833	9934	17092	11074	11483	10608	10965	12621
ENSG00000075420.8	19774	13644	10622	10812	8731	6496	14149	16886	11130	12948	14452	14535
ENSG00000075426.7	8245	9164	19253	6913	7224	7551	14907	27752	12573	12138	13071	14886
ENSG00000075429.4	0	0	0	0	0	0	0	0	1	0	0	0
ENSG00000075461.5	0	0	0	0	0	0	0	0	0	0	0	0
ENSG00000075539.9	4146	3582	6972	3328	2828	3427	5048	4947	8437	7357	6933	8271
ENSG00000075568.12	3202	2116	2989	1780	1496	1655	2991	2707	1883	2629	1699	1976
ENSG00000075618.13	11273	10688	10850	8559	8511	5180	8632	4119	16183	5807	8073	7833
ENSG00000075624.9	148176	116340	162985	121897	62401	77815	147972	143159	108755	83350	39016	65771
ENSG00000075643.5	675	595	1372	856	1368	1618	2943	3665	4511	6739	3374	3496
ENSG00000075651.11	1241	809	1859	866	1337	497	882	678	1977	1208	1517	1579
ENSG00000075673.7	1	1	0	0	1	0	2	0	1	0	0	0
ENSG00000075702.12	90	71	149	62	162	431	893	326	305	448	321	481
ENSG00000075711.16	13504	7447	10174	8125	4588	4078	6836	6376	9637	4727	9084	10285
ENSG00000075785.8	3159	3982	5990	3214	4040	3620	5460	5499	5101	4278	2737	3039
ENSG00000075790.6	3065	1364	3218	1554	1831	2044	2882	1871	3360	2580	1610	2154
ENSG00000075826.12	169	142	113	129	132	48	105	127	442	335	560	592
ENSG00000075856.7	3154	2323	3414	2248	1926	1939	3457	3147	2475	2594	2530	3336
ENSG00000075884.8	5	3	0	0	20	13	8	4	0	0	0	0
ENSG00000075886.10	3	0	0	0	1	0	1	2	2	0	0	0
ENSG00000075891.17	103	101	307	50	43	21	48	32	107	75	153	180
ENSG00000075914.8	1258	1130	1277	1026	812	496	923	639	1489	995	1089	1197
ENSG00000075945.8	1363	921	1421	837	1019	2001	1756	2219	1403	1812	1388	1407
ENSG00000075975.11	2828	1944	2355	1735	768	664	1245	683	1838	1521	1497	1506
ENSG00000076003.4	1276	837	1441	918	505	1593	3606	1029	1276	2523	1775	2490
ENSG00000076043.5	7080	5776	4687	5282	1221	977	1769	1450	2368	2301	2030	2138
ENSG00000076053.6	1708	901	1372	682	546	523	1089	754	1354	835	981	1044
ENSG00000076067.7	1764	1326	1148	1108	127	283	448	423	273	751	726	895
ENSG00000076108.7	3608	2196	4236	2042	3057	1494	3669	3349	4372	2890	4054	4259
ENSG00000076201.10	419	558	576	479	176	238	312	289	305	378	412	356
ENSG00000076242.10	1741	1437	2008	1532	812	1216	1897	1626	1241	1875	1384	1597
ENSG00000076248.6	1024	854	1554	711	580	1138	1862	600	597	1315	1120	1593
ENSG00000076258.5	70	60	179	27	76	226	140	204	121	188	125	165
ENSG00000076321.6	2106	867	1470	1170	441	365	907	1367	602	549	833	877
ENSG00000076344.11	72	32	104	35	2	0	0	0	3	1	5	1
ENSG00000076351.8	405	374	285	314	601	673	817	880	508	637	1129	567
ENSG00000076356.6	4125	2004	988	2454	106	294	399	500	258	912	246	258
ENSG00000076382.12	180	106	192	100	386	861	2657	760	1198	1760	3390	3280
ENSG00000076513.12	5701	3569	4544	3107	1080	2136	2684	1967	1846	4237	2797	4467
ENSG00000076554.11	670	305	1456	355	509	1140	1703	1124	1946	1936	1843	1951
ENSG00000076555.11	217	209	377	181	424	304	514	245	196	96	160	183
ENSG00000076604.10	3257	3206	3892	2308	4657	2285	2899	5591	4049	2216	2284	2134
ENSG00000076641.4	1167	642	3110	826	2031	2608	3730	7262	4058	4497	3782	3139
ENSG00000076650.2	504	390	498	357	473	507	986	554	273	231	251	311
ENSG00000076662.5	426	331	271	266	276	183	288	138	331	352	409	334
ENSG00000076685.14	5235	2746	5218	3348	2853	5239	8685	7150	3835	5766	4301	3910
ENSG00000076706.10	2743	3673	4727	3271	59	11	47	207	8665	1239	2177	1484
ENSG00000076716.7	921	340	2127	674	316	345	696	297	639	647	753	814
ENSG00000076770.10	376	119	465	210	384	589	1914	903	6	0	5	30
ENSG00000076826.5	154	108	235	82	36	76	90	177	381	292	409	449
ENSG00000076864.15	95	152	617	182	144	98	188	326	53	18	135	181
ENSG00000076924.7	1541	1134	1489	941	1067	761	1275	872	1611	1339	1842	1911
ENSG00000076928.13	2749	1899	2193	1773	389	597	813	706	1674	2549	1416	1780
ENSG00000076944.10	348	321	1043	264	848	823	1309	1452	1138	1487	1599	1570
ENSG00000076984.13	1097	752	936	602	344	436	687	807	905	875	926	1064
ENSG00000077009.9	1	0	0	0	0	0	0	0	0	0	0	0
ENSG00000077044.5	1511	1258	1163	1003	1790	2549	5175	7549	4129	6228	5373	4150
ENSG00000077063.6	543	570	2618	515	237	376	536	272	618	560	508	614
ENSG00000077080.5	0	0	1	0	1	0	0	0	0	0	0	0
ENSG00000077092.14	1840	2158	137	1903	603	1279	1325	436	37	17	22	69
ENSG00000077097.9	6179	4753	7094	3910	2868	2939	6995	3696	5706	2389	2399	3748
ENSG00000077147.10	15538	9025	13594	8343	7178	4186	12381	7253	16184	5564	7304	9174
ENSG00000077150.13	1672	1191	2731	1176	4946	2242	3886	5612	2864	2308	3665	2518
ENSG00000077152.5	118	91	180	152	181	628	1272	244	317	667	606	1035
ENSG00000077157.16	1031	560	986	628	385	367	908	807	970	618	1080	914
ENSG00000077232.12	14808	7827	15465	9513	5123	6320	9792	7538	5538	11223	3701	6419
ENSG00000077235.13	8050	5358	8451	5019	3657	3362	6030	5340	7735	5220	5788	7399
ENSG00000077238.9	2017	1459	2139	1237	1940	716	1465	1498	2467	2294	2065	2572
ENSG00000077254.10	5536	3170	5095	2805	2609	2519	5488	3539	4807	3923	3161	4070
ENSG00000077264.10	269	191	489	224	375	50	474	88	253	81	171	140
ENSG00000077274.7	7	24	18	10	16	5	10	3	22	3	3	3
ENSG00000077279.12	0	0	1	0	10	9	6	6	16	0	0	3
ENSG00000077312.4	861	908	1094	902	1071	1138	2053	1435	1959	1533	2233	2220
ENSG00000077327.11	10	9	3	5	1	14	7	16	2	7	14	5
ENSG00000077348.4	330	254	265	310	288	271	416	632	1059	1545	1703	1478
ENSG00000077380.11	7142	7796	11799	6751	3197	2937	5358	3951	7547	4997	4426	5271
ENSG00000077420.11	187	131	423	229	770	1746	2323	2814	961	1818	2115	1987
ENSG00000077454.11	626	650	715	485	440	364	401	462	808	701	469	499
ENSG00000077458.8	819	480	684	373	161	203	652	395	621	531	645	774
ENSG00000077463.10	364	525	668	448	706	475	691	805	954	587	624	681
ENSG00000077498.8	0	0	0	1	0	0	0	0	0	0	0	0
ENSG00000077514.4	652	372	584	380	164	460	873	300	475	1559	913	1580
ENSG00000077522.8	15	10	76	16	6	6	21	39	2	12	3	3
ENSG00000077549.13	5084	4589	4936	4059	1406	1370	2336	2094	5093	4251	2785	3878
ENSG00000077585.9	798	693	939	565	350	225	339	189	986	721	501	536
ENSG00000077616.6	59	34	28	29	0	0	0	0	0	0	0	0
ENSG00000077684.11	5391	4286	3190	3657	1490	2080	5731	3234	5036	3880	4774	5147
ENSG00000077713.14	597	627	898	559	871	1495	2709	2160	676	1168	1427	1280
ENSG00000077721.11	3119	2606	3481	2188	2199	1920	4151	3013	2344	1624	1516	2066
ENSG00000077782.15	4539	3077	8191	3511	1581	2792	4337	8444	1276	3835	2883	2485
ENSG00000077800.7	0	0	0	1	2	0	0	0	0	0	0	0
ENSG00000077809.8	4302	3986	6131	3036	4794	3171	6567	3916	8520	4316	4792	6992
ENSG00000077935.12	0	0	0	3	0	0	0	0	2	0	0	0
ENSG00000077942.13	884	1127	32	755	2281	1873	5833	4373	12	3	1	1
ENSG00000077943.7	14	45	6	41	1	0	0	0	5	0	0	0
ENSG00000077984.4	1	0	0	0	0	0	0	0	8	0	2	3
ENSG00000078018.15	621	203	419	219	1231	2326	2506	3621	218	228	307	243
ENSG00000078043.11	985	873	1365	719	424	321	724	545	926	791	1057	1337
ENSG00000078053.12	8	10	7	5	4	2	5	2	249	180	208	212
ENSG00000078061.8	2057	1822	2165	1641	575	524	765	685	1481	1280	1014	1205
ENSG00000078070.7	1117	672	1802	742	584	695	1459	1568	1040	914	1566	1760
ENSG00000078081.3	54	35	20	42	5	1	3	24	0	0	0	2
ENSG00000078098.9	9178	6840	325	5049	8	2	15	2	6	15	0	1
ENSG00000078114.14	58	82	399	69	96	286	404	1459	915	480	895	1119
ENSG00000078124.7	1355	717	1798	615	253	445	846	553	735	605	473	729
ENSG00000078140.9	2796	1726	2650	1605	1889	1588	3163	2676	4230	2076	1920	2194
ENSG00000078142.7	3357	2513	3222	2364	885	903	1515	1183	2719	1993	1734	2214
ENSG00000078177.9	549	526	1333	484	435	208	593	482	1571	955	860	1047
ENSG00000078237.4	2631	1647	2034	1524	1180	1094	1445	2015	1044	789	271	245
ENSG00000078246.11	1335	815	1188	935	1069	886	1606	1682	1480	1658	1852	2173
ENSG00000078269.9	5050	2888	4891	3396	2496	2479	4505	5092	8554	3763	4370	6093
ENSG00000078295.11	1	0	1	1	1	0	0	0	0	0	0	0
ENSG00000078304.15	6255	3748	5797	3417	1305	1507	2600	1751	3222	2552	2679	3414
ENSG00000078319.7	228	218	269	157	326	288	251	302	582	622	466	554
ENSG00000078328.15	1	3	1	0	2	0	1	0	1	2	9	3
ENSG00000078369.13	18706	14709	20410	13637	5565	4240	7494	7397	20962	14635	13267	16112
ENSG00000078399.11	664	638	1340	473	1668	1291	2030	494	3022	1814	1609	2177
ENSG00000078401.6	2130	1879	2265	1455	19	15	22	94	3159	2062	6929	9359
ENSG00000078403.12	1091	999	1393	876	699	897	1638	1529	1463	1606	2148	2042
ENSG00000078487.13	155	112	127	112	90	88	201	327	269	292	255	321
ENSG00000078549.10	0	0	0	1	4	0	2	0	0	0	1	0
ENSG00000078579.8	13	3	13	10	0	0	0	0	0	0	0	1
ENSG00000078589.8	0	0	0	0	0	0	0	0	0	0	0	0
ENSG00000078596.6	51	98	12	47	2	0	1	0	0	0	0	0
ENSG00000078618.15	6480	5017	5543	4421	2795	3020	4869	4364	6619	6680	4954	5371
ENSG00000078668.9	3700	3098	3817	2906	2132	2179	3589	2452	1362	1469	1275	1518
ENSG00000078674.13	5645	6237	10499	5808	2811	2693	4281	4752	4090	4644	4235	5036
ENSG00000078687.12	345	358	248	229	330	333	749	889	360	259	219	186
ENSG00000078699.17	812	659	808	449	462	310	662	505	1282	1038	1446	1521
ENSG00000078725.8	121	119	589	140	6	8	9	0	397	1097	985	1628
ENSG00000078747.8	7673	4768	7825	4577	4004	3349	6192	6501	11199	9412	9181	9026
ENSG00000078795.12	3	0	2	3	0	0	0	0	0	0	0	0
ENSG00000078804.8	570	435	563	359	79	47	56	70	309	93	159	233
ENSG00000078808.12	6958	6022	5917	5018	2465	1767	2759	2738	8994	7132	5676	8109
ENSG00000078814.11	1	4	7	4	2	3	5	21	24	20	66	60
ENSG00000078898.6	0	0	0	0	0	0	0	0	0	0	0	0
ENSG00000078900.10	1	0	5	0	0	0	0	0	18	72	130	99
ENSG00000078902.11	2650	1580	2647	1559	1133	1352	1994	1879	1655	1524	1320	1432
ENSG00000078967.8	637	565	769	570	471	293	386	430	858	396	248	307
ENSG00000079101.12	14	22	25	13	9	22	12	14	10	0	1	2
ENSG00000079102.12	324	298	147	164	13	12	29	5	65	11	6	8
ENSG00000079112.5	3	7	33	4	63	46	93	567	81	55	41	65
ENSG00000079134.7	1000	727	1050	742	206	316	610	480	879	918	1064	1026
ENSG00000079150.13	990	771	289	699	148	319	484	79	410	473	641	890
ENSG00000079156.12	496	482	708	497	227	204	474	393	1489	1655	915	1181
ENSG00000079215.9	77	32	35	36	404	135	502	90	110	83	103	52
ENSG00000079246.11	24132	16252	31927	17057	6454	9370	15825	9391	21440	12063	6936	10837
ENSG00000079257.3	1510	1054	1098	954	605	503	1813	1473	541	375	768	843
ENSG00000079263.14	200	89	476	162	1061	1941	2473	1366	638	92	46	15
ENSG00000079277.15	945	828	1236	636	627	572	713	754	1418	1282	1538	1348
ENSG00000079308.12	6847	6495	7678	8420	125	91	301	213	1060	2249	6102	5461
ENSG00000079313.7	1170	935	828	723	755	960	1137	1874	2023	1528	1243	1323
ENSG00000079332.10	12348	3755	7805	6774	7165	5065	8952	3601	9589	6589	6768	8319
ENSG00000079335.13	298	222	358	145	262	123	279	257	282	342	363	334
ENSG00000079337.11	768	919	6575	1181	945	1104	3396	1182	800	232	567	709
ENSG00000079385.17	5	0	4	2	165	76	78	59	42	7	11	19
ENSG00000079387.9	940	619	804	550	519	838	1381	1337	981	1232	719	965
ENSG00000079393.16	1	0	3	0	2	0	1	3	0	7	4	5
ENSG00000079432.3	2565	2539	2046	1911	840	1315	1818	4501	1725	1783	2189	2310
ENSG00000079435.5	58	21	36	41	2	1	3	0	33	33	31	51
ENSG00000079459.8	2981	2746	2968	2518	2059	1095	1892	622	3696	1468	1447	1643
ENSG00000079462.3	334	564	683	317	361	255	577	240	926	482	782	862
ENSG00000079482.11	2002	1142	2044	1353	176	428	954	589	237	421	593	609
ENSG00000079557.3	0	0	1	0	1	1	3	0	0	0	0	0
ENSG00000079616.8	469	427	827	413	452	854	2422	1003	1088	1912	2611	3447
ENSG00000079689.9	2	3	5	1	2	0	0	0	2	0	0	0
ENSG00000079691.15	3078	2738	6404	2315	1033	628	2131	3129	4508	1273	3345	4187
ENSG00000079739.11	6064	4916	5464	4759	2593	848	3459	2728	3563	1935	5509	5972
ENSG00000079785.10	5940	5112	7839	4716	4261	3297	6530	4336	6265	3626	4015	4077
ENSG00000079805.12	6971	4542	9368	4165	5514	3983	11622	11350	19138	13371	35795	39594
ENSG00000079819.12	6287	5064	4549	4641	2458	1584	3749	1665	5490	3806	4416	5700
ENSG00000079841.14	286	314	406	206	1	2	1	1	1	7	0	0
ENSG00000079931.10	463	476	724	401	1220	1975	2185	1068	3631	5969	3396	4540
ENSG00000079950.9	4648	2585	4210	2407	1546	1675	2492	1312	3639	2402	2971	2967
ENSG00000079974.13	375	219	418	240	280	224	190	302	379	502	360	440
ENSG00000079999.9	2992	2136	2846	2174	3015	2663	3595	2595	3158	2268	2110	2513
ENSG00000080007.6	114	90	179	66	0	0	0	0	0	0	0	0
ENSG00000080031.5	109	83	167	97	368	280	412	1755	153	420	958	584
ENSG00000080166.11	2	0	4	1	9	36	61	98	15	23	21	15
ENSG00000080189.10	1523	1172	1619	848	1161	1076	1786	1878	3243	3474	3017	3005
ENSG00000080200.5	1846	1285	2053	1246	674	755	1139	665	1553	1414	1260	1365
ENSG00000080224.13	9	18	13	13	24	19	103	66	88	101	447	310
ENSG00000080293.5	0	1	0	0	0	0	0	0	0	0	3	0
ENSG00000080298.11	283	264	271	160	212	143	330	250	354	151	280	397
ENSG00000080345.13	6306	3961	8660	4130	2633	4904	12277	7821	6709	7561	8268	10500
ENSG00000080371.4	2327	1502	3161	1866	1429	1164	2931	3049	2308	1353	1746	2193
ENSG00000080493.9	1538	1756	1751	1163	2175	1913	3472	2258	6448	1929	4367	6527
ENSG00000080503.15	5021	3404	5006	3063	1791	2112	4499	2383	3002	3039	3201	4146
ENSG00000080511.2	0	0	0	0	0	0	0	1	0	0	0	0
ENSG00000080546.9	1173	1244	1161	855	1224	666	1037	962	971	518	1222	1215
ENSG00000080561.9	721	600	1018	576	1	0	0	0	506	646	785	712
ENSG00000080572.8	0	0	0	0	0	1	2	0	0	0	1	3
ENSG00000080573.6	153	132	4	93	29	38	29	70	0	3	0	0
ENSG00000080603.12	1662	1183	1935	1155	1168	990	1324	2395	1440	1247	926	1007
ENSG00000080608.9	2034	2048	2026	2016	1329	2178	3446	3618	2438	2696	1646	1793
ENSG00000080618.9	1	0	0	0	0	0	0	0	3	0	1	0
ENSG00000080644.11	3	0	4	1	22	5	9	27	0	0	1	0
ENSG00000080709.10	4	11	1	5	0	4	0	0	0	0	0	0
ENSG00000080802.14	841	598	777	496	664	506	814	688	1048	800	978	1135
ENSG00000080815.14	6790	3491	6177	3425	1636	958	2079	1908	2878	1624	1964	2280
ENSG00000080819.2	1637	841	887	880	839	746	1109	328	1772	1052	889	894
ENSG00000080822.12	2879	1255	1921	1350	1455	1446	2234	2109	2984	3209	3304	3195
ENSG00000080823.17	981	457	1336	490	374	516	1360	1043	515	819	552	780
ENSG00000080824.14	37878	21253	32939	23046	12363	11435	21211	8493	30201	11786	5232	7792
ENSG00000080839.7	306	162	330	163	209	610	1389	403	881	2251	1525	1862
ENSG00000080845.13	1553	1262	1572	998	470	337	442	710	1693	1311	1685	1412
ENSG00000080854.10	9	5	25	6	9	10	11	41	5	0	0	1
ENSG00000080910.7	1	0	0	0	0	0	0	0	0	0	0	0
ENSG00000080947.10	172	132	260	132	72	95	157	94	448	408	456	558
ENSG00000080986.8	63	27	80	17	120	300	1143	345	606	986	1158	1478
ENSG00000081014.6	2834	1551	2355	1429	1005	1466	2116	2016	1257	1325	438	517
ENSG00000081019.9	1516	769	1067	698	360	424	834	381	695	845	952	1060
ENSG00000081026.14	597	343	630	415	205	400	586	220	1253	1583	1455	1716
ENSG00000081041.8	240	184	890	166	1976	533	629	885	155	209	142	228
ENSG00000081051.3	23	9	21	21	173	257	257	122	44	13	5	10
ENSG00000081052.10	3424	1782	5543	1446	14	8	20	22	2	4	8	1
ENSG00000081059.15	23	15	50	16	902	758	1313	600	155	171	78	137
ENSG00000081087.10	5113	3048	3753	2383	2588	356	2756	2558	5026	492	711	994
ENSG00000081138.9	3	1	1	0	0	0	2	0	0	0	0	1
ENSG00000081148.11	49	43	46	32	32	12	28	29	48	17	25	19
ENSG00000081154.7	6398	2841	4464	2874	1690	2982	5879	4012	2989	3506	3991	4278
ENSG00000081177.14	2090	1261	1910	1286	250	245	359	228	612	458	487	638
ENSG00000081181.3	60	31	141	63	19	12	19	73	259	1786	1927	2144
ENSG00000081189.9	323	178	243	238	180	303	393	185	201	245	554	438
ENSG00000081237.14	15	9	34	7	0	5	0	2	12	4	0	0
ENSG00000081248.6	1	4	7	0	1	3	1	2	6	0	0	1
ENSG00000081277.7	4	13	11	11	3	2	1	2	2	8	3	10
ENSG00000081307.8	1482	1511	1836	1254	511	788	1647	1405	1569	1484	1433	1792
ENSG00000081320.6	2139	1778	2287	1601	829	1213	2359	1205	1379	1393	1477	1500
ENSG00000081377.12	1699	973	2261	861	1642	1864	2528	2086	1710	1822	2156	2663
ENSG00000081386.8	1059	583	954	599	481	601	1217	996	1321	1101	1132	1424
ENSG00000081479.8	10	19	6	7	8	2	4	2	3	3	2	1
ENSG00000081665.9	441	173	457	229	221	257	483	547	804	603	685	1008
ENSG00000081692.8	966	808	1061	795	726	624	1321	1118	1179	946	1037	1118
ENSG00000081721.7	954	587	1004	650	300	330	669	689	522	711	798	828
ENSG00000081760.12	1617	1517	2502	1195	938	921	1967	1561	1831	1491	1977	1980
ENSG00000081791.4	2351	1438	2280	1440	554	487	1136	993	1759	931	1261	1273
ENSG00000081800.4	0	0	0	0	0	0	0	0	0	0	0	2
ENSG00000081803.11	811	531	459	469	596	1337	2103	571	147	327	377	378
ENSG00000081818.1	11	2	4	5	18	8	27	6	7	1	9	2
ENSG00000081842.13	32	16	23	9	0	0	10	2	0	0	0	0
ENSG00000081853.13	45	7	17	17	0	2	1	1	12	6	7	7
ENSG00000081870.7	660	434	789	456	493	623	1000	623	1675	1481	1593	1620
ENSG00000081913.9	686	460	681	342	93	291	334	95	426	581	318	456
ENSG00000081923.6	2292	3520	4204	4061	2409	3130	4241	2870	784	668	865	985
ENSG00000081985.6	0	4	1	1	2	1	2	2	0	1	0	0
ENSG00000082014.12	1002	1122	693	964	203	76	289	557	1166	648	1390	1537
ENSG00000082068.4	1674	1217	1293	1014	665	660	1290	1063	2220	1921	1557	1764
ENSG00000082074.11	2	0	3	2	11	63	56	11	1	2	1	0
ENSG00000082126.13	194	81	87	142	88	93	134	10	12	21	3	5
ENSG00000082146.8	2200	2101	2561	1718	1114	1212	1491	983	3072	1765	1592	2279
ENSG00000082153.13	9603	9995	19352	10219	7129	8162	11784	9969	8289	9406	4679	5941
ENSG00000082175.10	202	178	8	147	1	0	0	0	0	0	0	0
ENSG00000082196.16	30	29	51	13	5	10	23	14	21	53	64	122
ENSG00000082212.7	2211	1542	3080	1685	831	1175	1913	2256	2248	2502	1538	1867
ENSG00000082213.13	2062	1121	1478	982	861	1067	1452	1031	2471	2124	1056	1182
ENSG00000082258.8	3486	1973	3707	1473	1742	1303	2906	2278	3027	1916	1957	2199
ENSG00000082269.12	822	580	1045	439	481	382	815	696	1055	644	720	690
ENSG00000082293.8	3	0	4	2	0	0	0	0	2	0	0	0
ENSG00000082397.11	482	292	946	297	1679	1172	2099	1793	154	40	89	142
ENSG00000082438.11	6663	4524	12756	5166	671	1013	1470	1305	2095	2032	2668	4551
ENSG00000082458.7	600	631	649	586	1395	1479	3238	1856	394	487	239	286
ENSG00000082482.9	33	36	21	29	2	1	1	0	1	0	0	1
ENSG00000082497.7	437	450	202	463	217	193	439	212	334	370	287	331
ENSG00000082512.10	948	935	874	835	132	136	346	392	249	268	259	382
ENSG00000082515.12	832	688	848	570	328	373	704	692	571	537	461	581
ENSG00000082516.8	2165	1516	1940	1588	820	1198	2118	1264	1308	1148	1103	1243
ENSG00000082556.6	1	0	10	3	1	0	1	0	0	0	2	1
ENSG00000082641.11	16933	8821	16543	12239	17823	10508	18250	28016	23178	23812	18083	14676
ENSG00000082684.10	0	0	3	2	11	0	6	20	373	537	2769	4813
ENSG00000082701.10	4196	3245	3972	2659	2307	1982	2989	3037	3630	2748	2712	2908
ENSG00000082781.7	19362	18296	18603	17225	9414	7652	14702	11503	27565	19851	23857	23251
ENSG00000082805.15	3378	2694	4121	2372	1484	1559	2695	2861	3385	3028	2628	3163
ENSG00000082898.12	8787	6149	10486	6396	5721	7291	14028	7066	8989	8127	6790	8007
ENSG00000082929.4	0	0	0	0	0	0	0	2	2	0	0	0
ENSG00000082996.15	2521	1577	2261	1307	1838	1848	2654	1967	2331	2105	1953	1941
ENSG00000083067.18	33	26	119	28	1	3	3	1	11	0	3	19
ENSG00000083093.5	1273	764	1512	770	603	1153	1920	1746	886	1173	1002	1233
ENSG00000083097.10	1928	1611	1996	1325	286	440	684	912	816	934	611	832
ENSG00000083099.6	1790	1544	2719	1423	679	980	1369	1285	1363	1301	1051	1307
ENSG00000083123.10	741	433	871	507	220	259	403	271	840	656	418	622
ENSG00000083168.5	2974	1804	3238	1913	1279	1793	3119	2751	1557	2108	1229	1554
ENSG00000083223.13	4660	2342	3718	2503	3291	3579	4252	3895	2685	2562	2341	2568
ENSG00000083290.15	1502	862	1298	687	11	4	0	1	364	602	425	593
ENSG00000083307.6	1	4	0	0	2	0	1	0	0	0	0	0
ENSG00000083312.13	14839	14085	14083	12248	6272	7654	16844	20725	4312	3076	4285	4109
ENSG00000083444.12	15652	11403	5906	10607	2929	2408	4179	2664	14107	11852	10140	10974
ENSG00000083454.17	178	174	262	139	77	103	104	63	16	8	7	17
ENSG00000083457.7	718	553	513	542	354	376	609	780	614	639	603	755
ENSG00000083520.10	5360	3080	4929	2873	1501	1788	2699	2213	2741	2477	2636	2584
ENSG00000083535.11	1158	984	1276	988	407	497	703	684	784	862	782	1093
ENSG00000083544.9	782	535	713	518	191	317	481	479	720	683	976	1039
ENSG00000083622.8	0	0	0	0	0	0	0	0	0	0	0	0
ENSG00000083635.7	626	507	672	459	176	226	379	507	438	398	336	379
ENSG00000083642.14	1514	1202	1492	969	351	402	981	382	957	989	856	1047
ENSG00000083720.8	1359	1311	1578	1341	25	6	5	5	1772	2067	1373	2150
ENSG00000083750.8	794	607	727	503	105	205	310	318	378	386	600	520
ENSG00000083782.3	8	7	2	6	0	0	0	0	5	0	0	0
ENSG00000083799.13	4467	2771	6500	3081	6792	2653	6286	10020	4250	2211	1995	2486
ENSG00000083807.5	175	138	104	129	92	217	308	170	18	14	23	23
ENSG00000083812.7	558	476	565	381	440	418	596	382	386	360	381	390
ENSG00000083814.8	398	307	352	205	0	0	2	0	0	0	1	3
ENSG00000083817.8	461	320	375	288	76	83	143	154	296	341	300	351
ENSG00000083828.11	595	446	563	341	269	341	607	674	324	340	438	514
ENSG00000083838.11	439	326	439	268	494	394	687	650	573	458	472	544
ENSG00000083842.8	0	0	0	0	0	0	0	0	0	0	0	0
ENSG00000083844.6	949	701	1154	609	404	298	705	1110	983	726	1283	1026
ENSG00000083845.4	16543	18882	14155	15010	13811	18009	25464	21332	17732	17676	19013	18701
ENSG00000083857.9	76606	53451	80482	48152	44799	33197	55305	48239	13126	11857	8987	10598
ENSG00000083896.8	4670	3013	4708	2650	1634	1543	3351	3673	2756	2543	3341	3367
ENSG00000083937.4	2711	1695	2376	1371	777	1425	2077	1567	931	1042	869	1165
ENSG00000084070.7	518	441	603	434	349	541	589	478	572	923	702	952
ENSG00000084072.12	1933	1317	1668	1203	522	661	1240	1299	500	923	953	1063
ENSG00000084073.4	4698	2073	4088	2406	1946	2974	5204	3087	3146	2018	1177	1352
ENSG00000084090.9	12451	10137	7926	8438	4437	4344	8641	3955	6432	3702	3693	4712
ENSG00000084092.6	1157	1005	1265	810	761	750	1079	561	1370	1418	1358	1471
ENSG00000084093.11	6349	2695	5230	3196	1952	1892	4129	2852	3276	2853	2100	2546
ENSG00000084110.6	16	15	17	4	6	4	8	8	6	6	8	3
ENSG00000084112.10	8404	5678	4097	5285	4602	1862	3626	3347	2912	3267	1812	1624
ENSG00000084207.11	18691	24080	22865	20074	5	0	1	2	8204	6203	4910	7392
ENSG00000084234.12	25583	18924	39536	19521	23247	12593	28535	19162	45197	23290	44219	47227
ENSG00000084444.9	262	372	268	184	169	222	282	282	200	333	263	157
ENSG00000084453.12	32	29	301	21	7	3	0	0	12	0	0	5
ENSG00000084463.3	1807	1142	2151	1202	1385	1412	2427	1338	1990	1929	1824	2379
ENSG00000084623.7	9344	7245	10156	7439	3058	3440	5008	5017	10824	8533	5801	7229
ENSG00000084628.5	3	5	6	2	4	5	5	10	4	0	6	3
ENSG00000084636.13	5890	7269	5667	5777	410	124	253	244	600	418	354	174
ENSG00000084652.11	8808	5845	7455	5732	2940	2094	4456	3350	7790	5010	4924	5882
ENSG00000084674.9	4	4	9	9	1	0	0	0	0	0	0	0
ENSG00000084676.11	2544	1492	2804	1306	964	958	1720	1893	1808	1925	1454	1646
ENSG00000084693.11	1922	1888	2770	1428	1587	1305	1693	2165	3329	2814	3416	3877
ENSG00000084710.9	64	40	254	43	83	255	42	13	63	8	2	10
ENSG00000084731.9	1933	1670	4246	1937	2372	3264	5389	4657	2173	1513	1561	1396
ENSG00000084733.6	10684	5862	11694	6273	7447	10152	14039	17006	10029	6896	6000	7248
ENSG00000084734.4	12	6	1	4	1	0	1	2	57	69	272	154
ENSG00000084754.6	9138	7165	12003	6226	3627	6193	8639	7117	5964	6044	5871	7127
ENSG00000084764.6	240	287	232	177	793	853	1018	1369	1028	648	760	706
ENSG00000084774.9	3294	3057	4602	2739	1376	1947	3917	2904	3054	3545	2395	2516
ENSG00000085063.10	40728	29943	29358	30890	11273	9730	17760	14860	6234	6980	6426	7360
ENSG00000085117.7	1313	1239	3931	1210	8041	1697	3081	1276	3423	2236	1910	1693
ENSG00000085185.11	342	226	300	237	72	64	115	75	139	123	196	205
ENSG00000085224.16	11321	6594	8573	5478	5629	5069	11776	6994	6049	3958	4804	5771
ENSG00000085231.9	3673	3045	3883	2942	2251	2303	3457	3932	2274	1516	1549	1581
ENSG00000085265.6	0	0	0	0	0	0	0	0	0	0	0	0
ENSG00000085274.11	1777	1222	1464	1013	667	811	1576	1421	1083	989	1033	1006
ENSG00000085276.13	3070	2021	2312	1822	642	885	1717	634	1098	925	1049	1753
ENSG00000085365.13	5213	1689	3166	1788	1078	636	2455	1390	1849	527	1303	1409
ENSG00000085377.9	1224	747	994	708	322	583	629	497	814	929	418	558
ENSG00000085382.7	664	533	709	516	109	125	297	203	417	492	1121	1254
ENSG00000085415.11	2013	1660	2027	1529	475	738	1264	1030	1223	1612	1149	1192
ENSG00000085433.11	989	1167	2852	1318	435	396	742	817	1074	940	1365	1391
ENSG00000085449.10	8082	4442	8459	4356	3282	2661	7076	7365	5125	5996	10001	8971
ENSG00000085465.11	75	45	220	37	104	20	28	21	241	107	167	126
ENSG00000085491.11	4985	1806	4428	2102	2619	582	5426	2935	7785	1284	4289	4183
ENSG00000085511.15	1590	1887	3329	1312	395	463	1144	452	1877	1838	2080	2254
ENSG00000085514.11	6	6	35	6	102	20	99	124	21	14	35	30
ENSG00000085552.12	1	3	11	1	10	1	2	5	4	4	0	3
ENSG00000085563.10	1893	1114	6203	950	1343	593	1332	723	2237	772	1457	2810
ENSG00000085644.9	274	239	237	209	106	113	182	284	286	355	260	285
ENSG00000085662.9	7320	8010	36370	8175	47305	34374	78177	54682	13781	17481	18025	23261
ENSG00000085719.7	6542	3994	8048	3954	2810	1984	6845	3868	8617	2521	9151	9012
ENSG00000085721.8	4468	2579	3660	2595	1879	736	2645	4131	2951	1027	1702	1814
ENSG00000085733.11	16858	12191	18853	12943	8638	7611	11083	6619	12435	8423	7425	9703
ENSG00000085741.8	39	30	2	14	0	0	0	0	0	0	5	0
ENSG00000085760.10	2439	1749	2777	1669	1605	2110	3259	3654	3067	3356	2576	2465
ENSG00000085788.9	3135	1818	3172	1585	375	560	1190	959	1301	1132	2112	1933
ENSG00000085831.11	68	49	415	67	94	131	160	712	401	333	953	743
ENSG00000085832.12	3157	2524	4173	2786	2089	2619	3558	2776	4328	4868	3421	4029
ENSG00000085840.8	68	42	93	30	149	553	1036	59	173	407	370	605
ENSG00000085871.4	878	794	1323	628	462	417	697	329	238	138	205	262
ENSG00000085872.10	851	624	682	566	352	385	520	811	421	356	259	319
ENSG00000085978.17	2700	2560	5960	2479	1863	2830	4738	4285	2217	3511	1995	1891
ENSG00000085982.9	4057	3299	9500	2904	1085	2329	3626	3947	1780	3557	2979	3112
ENSG00000085998.9	3345	2732	4162	2970	4521	3054	4115	3543	6476	5305	3744	4504
ENSG00000085999.7	11	8	33	15	100	200	585	91	205	368	299	398
ENSG00000086015.16	2177	1499	1632	1569	857	1503	1958	1743	1757	2947	2329	2648
ENSG00000086061.11	8778	6995	8183	6176	6988	6575	11708	5614	7435	3840	2429	3881
ENSG00000086062.8	3296	1942	4364	2398	2103	1268	5871	7436	3222	2286	6050	6686
ENSG00000086065.9	4399	2653	3214	2478	4107	3652	5886	4428	3375	2578	2577	2653
ENSG00000086102.14	2467	1566	2326	1606	2852	2451	4443	6806	2136	2209	2264	2378
ENSG00000086159.8	0	0	1	0	3	1	1	4	0	0	0	0
ENSG00000086189.5	2105	1386	1252	1266	276	499	921	856	427	457	348	373
ENSG00000086200.12	1668	1212	1640	1047	665	782	1435	1173	928	749	701	887
ENSG00000086205.12	10	16	14	11	0	0	0	0	1	0	0	0
ENSG00000086232.8	3861	2629	4191	2592	3726	3559	5783	3548	5661	5051	4828	4994
ENSG00000086288.7	9	3	15	8	0	0	0	0	0	0	0	0
ENSG00000086289.7	2605	3609	4611	2750	4995	2702	4837	3898	8678	3054	5785	6802
ENSG00000086300.11	894	596	3070	652	446	724	902	536	1342	1162	963	860
ENSG00000086475.10	1525	1253	1913	1072	870	1129	2397	1366	3194	2402	1228	1959
ENSG00000086504.11	2085	2299	2610	1828	1949	1466	2455	2925	2588	2023	1410	2051
ENSG00000086506.2	17	27	13	18	0	0	0	0	0	0	0	0
ENSG00000086544.2	1853	1006	1988	1133	1556	944	1207	1822	1401	1159	1401	1043
ENSG00000086548.8	0	0	0	0	5	1	1	0	0	2	0	0
ENSG00000086570.8	305	189	1589	347	539	301	271	337	127	40	33	36
ENSG00000086589.7	2324	1658	2422	1392	1425	1147	2224	1905	2659	1853	2234	2481
ENSG00000086598.6	18571	9804	12195	9807	6609	6238	11704	7152	16065	7741	9486	11366
ENSG00000086619.9	154	223	495	166	136	34	228	240	720	379	1011	846
ENSG00000086666.14	2890	2025	3346	1711	1445	1858	3037	2546	2619	1777	1499	1633
ENSG00000086696.6	1	1	15	0	0	0	1	0	0	0	4	0
ENSG00000086712.8	1959	747	1738	1037	730	938	1615	950	1359	1409	1226	1336
ENSG00000086717.14	0	0	4	0	0	3	5	6	3	8	39	10
ENSG00000086730.12	27	22	66	28	61	29	36	157	42	47	16	21
ENSG00000086758.11	18259	16128	18608	14910	3453	5249	10556	9623	6354	15010	10771	12569
ENSG00000086827.4	1380	990	1459	981	319	521	1068	578	748	689	517	673
ENSG00000086848.10	459	321	473	243	188	196	277	351	422	476	591	527
ENSG00000086967.9	1	0	0	0	1	0	4	13	0	0	0	0
ENSG00000086991.8	506	339	235	227	3	1	0	2	3	0	0	2
ENSG00000087008.11	823	614	684	634	522	442	618	463	1185	1170	1178	1174
ENSG00000087053.14	3201	3157	4371	2457	1165	1734	2606	2215	3669	2676	2383	3054
ENSG00000087074.7	6357	4705	4797	4269	3229	2583	4882	27642	5314	9169	8579	4560
ENSG00000087076.4	141	112	406	152	536	258	486	855	54	35	151	84
ENSG00000087077.7	3164	3325	4104	2461	4556	5225	10117	12215	4374	3015	4485	5106
ENSG00000087085.9	27	51	33	23	541	153	197	468	12	12	11	5
ENSG00000087086.9	66775	103344	42752	59597	134523	79417	127200	153029	88697	57632	104304	69422
ENSG00000087087.14	2004	1925	2560	1667	1398	1245	2581	807	2129	1180	1309	1345
ENSG00000087088.15	4234	3228	2924	2425	3956	2860	3891	4587	4035	3125	3104	2897
ENSG00000087095.8	1646	797	1297	651	527	591	851	616	911	682	400	547
ENSG00000087111.16	1036	1535	3035	1751	1246	1344	1848	2101	3768	3979	2577	3147
ENSG00000087116.9	1217	977	46	865	590	923	1806	1559	189	63	444	263
ENSG00000087128.5	1	0	8	1	5	0	2	0	2	0	0	0
ENSG00000087152.11	3762	2821	3036	2044	3031	2274	2908	3870	4050	3348	1786	1752
ENSG00000087157.14	1456	1260	1935	1105	1869	1004	1697	1048	2685	1915	1422	1634
ENSG00000087191.8	2739	3414	3944	2869	2453	2305	4025	3621	3661	2404	1640	1857
ENSG00000087206.12	1535	1082	1419	1209	788	979	1642	1267	1120	1389	1127	1271
ENSG00000087237.6	0	0	0	2	0	0	0	0	3	0	0	3
ENSG00000087245.8	8293	7988	4766	6233	7	20	9	5	4387	3010	3270	7270
ENSG00000087250.4	7	12	15	1	0	0	0	0	0	0	0	0
ENSG00000087253.7	2031	1286	1924	1210	227	179	679	497	2369	1511	1725	2232
ENSG00000087258.9	3	4	1	0	6	14	26	12	0	0	3	0
ENSG00000087263.12	3358	2255	3452	2772	1589	1554	2511	2926	2816	2081	1008	1414
ENSG00000087266.11	1733	1663	3089	1404	2762	2542	6061	16086	10920	15560	28386	22758
ENSG00000087269.11	1788	2072	2499	1957	1321	1343	2250	1559	2926	2687	1709	1762
ENSG00000087274.12	12475	9702	14411	9831	3985	2181	6249	6273	9953	5014	7322	9941
ENSG00000087299.7	170	96	246	146	49	85	130	34	202	201	310	329
ENSG00000087301.4	306	132	384	154	66	122	274	145	222	311	387	506
ENSG00000087302.4	3631	3832	4189	3612	1835	2309	3071	2227	2197	2118	1697	2269
ENSG00000087303.12	4783	6623	3512	6273	110	63	123	93	400	225	554	1234
ENSG00000087338.4	1536	444	1100	589	578	523	956	362	1012	914	1397	1620
ENSG00000087365.10	9512	8349	11713	7412	4663	3461	5895	4202	10375	7445	5687	6322
ENSG00000087448.5	2928	1309	1659	1286	716	685	1985	1048	1307	1060	867	1189
ENSG00000087460.19	23025	22378	22824	18377	8445	5710	11606	9646	35906	28213	33265	34198
ENSG00000087470.13	5796	2531	5158	3517	1267	2387	3854	2256	3713	2902	1741	2484
ENSG00000087494.11	331	143	1711	196	250	144	102	209	1157	3959	3233	6588
ENSG00000087495.12	7	5	2	13	0	0	0	0	0	0	0	1
ENSG00000087502.13	3565	1921	2775	1953	1590	2094	2587	1349	2963	1788	1355	2015
ENSG00000087510.5	11	4	83	11	116	352	540	537	0	9	0	11
ENSG00000087586.13	509	293	657	335	442	1030	2899	1144	1548	1769	3205	2967
ENSG00000087589.12	26	43	49	32	9	17	18	10	3	5	6	8
ENSG00000087842.6	337	301	432	257	789	784	1317	1614	231	425	236	225
ENSG00000087884.10	892	773	751	594	163	86	167	143	548	414	696	612
ENSG00000087903.8	116	99	91	66	189	104	266	426	302	350	484	577
ENSG00000087916.7	0	0	0	0	0	1	0	1	1	0	0	0
ENSG00000087995.11	904	796	1034	804	601	720	1061	1138	1210	978	707	777
ENSG00000088002.7	4	5	1	2	6	2	7	7	2	1	2	4
ENSG00000088035.11	579	239	453	274	133	263	436	254	177	257	342	427
ENSG00000088038.13	597	464	563	384	629	581	865	1009	891	825	717	774
ENSG00000088053.7	0	0	2	0	1	2	3	1	13	0	1	6
ENSG00000088179.4	1221	1131	1507	729	1176	1359	3330	1558	1278	1030	1545	1849
ENSG00000088205.8	5368	2971	5429	2911	3959	4541	7711	4820	5358	4560	3470	4054
ENSG00000088247.11	2824	1956	2911	1839	1803	1971	3631	2077	3462	2504	2244	2719
ENSG00000088256.4	3059	3129	4005	3575	1756	1854	2880	3054	3379	3718	2315	3044
ENSG00000088280.14	558	556	306	485	454	305	1060	1276	1292	501	931	1093
ENSG00000088298.8	1999	1382	1820	1375	1450	1570	1833	1654	2709	3012	2193	2441
ENSG00000088305.14	501	267	652	247	1103	844	1674	2014	1440	1397	955	1109
ENSG00000088320.3	0	0	27	1	0	0	0	0	0	0	1	1
ENSG00000088325.11	1011	656	750	772	824	2016	6350	2641	3558	4810	7541	8288
ENSG00000088340.11	102	157	129	93	117	74	316	476	2602	1575	4736	3989
ENSG00000088356.4	996	580	1092	582	669	605	797	1001	1655	1525	1328	1331
ENSG00000088367.16	910	1004	1639	831	1266	869	1347	2132	1360	699	1031	906
ENSG00000088386.11	129	37	1618	48	3	6	8	7	1	0	0	0
ENSG00000088387.13	2216	1292	3649	1753	738	537	861	753	2266	2047	1032	1169
ENSG00000088448.10	1937	1338	2387	1136	2074	1153	1847	1705	2069	1447	1786	2057
ENSG00000088451.6	619	336	642	330	482	612	849	888	350	573	696	497
ENSG00000088538.12	111	88	113	63	234	330	478	572	70	26	36	26
ENSG00000088543.10	528	330	568	401	445	111	323	398	136	46	102	76
ENSG00000088682.9	1452	1335	2065	1241	869	1031	1428	2295	2028	1762	1280	1615
ENSG00000088726.11	0	0	0	1	8	14	4	10	0	0	1	0
ENSG00000088727.8	167	155	196	126	55	203	156	123	132	234	164	227
ENSG00000088756.8	84	105	218	100	87	76	151	81	1728	479	603	797
ENSG00000088766.7	1960	1198	1992	1146	474	536	884	596	880	903	879	960
ENSG00000088782.4	0	0	0	0	0	0	0	0	0	0	0	0
ENSG00000088808.12	611	396	818	345	100	69	147	206	376	317	213	385
ENSG00000088812.13	5982	3556	4194	3078	1080	764	1767	1218	3758	2380	2168	2830
ENSG00000088826.13	1338	939	3724	792	743	963	2837	4542	1509	2970	4283	3435
ENSG00000088827.8	1	0	0	0	0	0	0	2	0	0	6	0
ENSG00000088832.10	5649	4309	5984	4141	2081	1747	2627	1307	3043	2899	2122	2527
ENSG00000088833.13	2501	1761	3998	2131	1272	715	1610	897	1675	1133	986	1200
ENSG00000088836.8	592	655	1542	487	10	33	25	31	9	9	7	6
ENSG00000088854.11	2678	1300	2349	1297	450	190	435	616	1244	788	2227	1832
ENSG00000088876.7	770	529	695	497	261	346	450	444	649	773	723	631
ENSG00000088881.16	90	71	42	56	10	8	27	83	10	32	80	121
ENSG00000088882.7	8	20	5	9	1	0	0	0	0	0	2	0
ENSG00000088888.13	2598	1970	2791	1801	1012	1142	1832	1528	3725	2417	2345	2539
ENSG00000088899.10	1121	713	1941	641	195	71	138	306	621	274	562	394
ENSG00000088926.9	0	2	0	0	4	1	11	24	1	0	0	0
ENSG00000088930.6	5682	5535	8517	5277	2856	3843	5934	3403	5813	5385	3245	4225
ENSG00000088970.11	496	314	400	273	306	312	456	294	549	756	1031	1024
ENSG00000088986.6	7791	7426	6390	6560	4414	3926	6469	6330	7131	5800	4351	5164
ENSG00000088992.13	34	16	43	17	0	0	0	0	62	56	30	5
ENSG00000089006.12	3651	2867	4522	2462	1604	2271	5036	3851	2107	3590	3551	3952
ENSG00000089009.11	33162	33752	31462	27815	11405	14985	26280	20125	26989	21457	24904	29360
ENSG00000089012.10	0	1	3	0	0	0	1	0	1	0	0	1
ENSG00000089022.9	1255	929	1366	880	683	842	1326	1351	1505	1492	1117	1365
ENSG00000089041.12	5	4	8	6	294	242	836	1997	6	21	65	37
ENSG00000089048.10	1782	808	1632	1145	692	973	1434	1583	1324	1143	1335	1241
ENSG00000089050.10	1457	928	1646	984	1323	1163	2562	1899	706	1019	1061	1351
ENSG00000089053.8	6757	4509	5842	5015	2855	3857	5381	2283	3812	4662	3373	4402
ENSG00000089057.10	1065	870	1075	733	687	909	1362	915	986	1995	1461	1444
ENSG00000089060.7	862	600	1398	541	802	617	932	775	891	1127	1021	1279
ENSG00000089063.10	6249	3707	4689	3925	1680	2344	1724	1401	4691	3619	1857	2421
ENSG00000089091.12	170	119	262	104	95	81	171	137	150	215	138	202
ENSG00000089094.12	769	546	781	496	510	483	1229	833	1192	1138	944	1224
ENSG00000089101.13	1	4	5	0	1	4	0	4	1	4	9	6
ENSG00000089116.3	1	0	0	2	1	0	0	0	0	0	0	0
ENSG00000089123.11	343	221	405	313	152	358	379	280	339	546	436	480
ENSG00000089127.8	96	53	297	154	1185	1052	4618	1404	120	173	528	924
ENSG00000089154.6	11879	8668	11734	8190	3983	4797	8277	5465	6981	6956	5917	6715
ENSG00000089157.11	66456	64270	55447	55862	23607	31077	46534	42774	80473	74460	71631	77190
ENSG00000089159.11	3529	3250	2504	2443	3643	2120	3078	4355	5889	5101	5832	5849
ENSG00000089163.4	72	53	32	43	30	13	21	12	40	6	17	10
ENSG00000089169.10	0	0	2	0	0	0	0	0	0	0	0	0
ENSG00000089177.13	715	482	798	453	518	663	1050	1120	791	1112	1329	1383
ENSG00000089195.10	1014	722	1166	720	301	557	659	685	505	1027	395	508
ENSG00000089199.5	23	23	32	22	4	1	6	5	0	2	0	0
ENSG00000089220.4	9088	5517	9613	6678	2878	2748	5203	3111	10132	6209	5505	7439
ENSG00000089225.15	0	0	0	0	0	0	0	0	0	0	0	0
ENSG00000089234.11	2252	1487	2123	1245	988	987	1405	983	1308	968	893	1055
ENSG00000089248.6	3807	4810	4586	3661	2810	2058	3976	2959	7531	5603	4863	5738
ENSG00000089250.14	1	2	1	3	11	24	20	5	0	3	0	0
ENSG00000089280.14	1118	754	1283	666	523	708	1928	1150	1357	1369	1322	1559
ENSG00000089289.11	2681	1710	2410	1705	1349	2157	3263	1226	822	1407	2665	2585
ENSG00000089327.10	1578	1570	1271	1408	2569	1271	2873	1864	2491	2303	3326	3296
ENSG00000089335.16	2100	1171	1323	1049	814	1367	2429	2475	674	937	859	1003
ENSG00000089351.10	1498	1372	1575	1208	2754	1638	3273	2615	2174	1660	2768	2286
ENSG00000089356.12	0	0	0	0	8	11	4	4	2	2	13	26
ENSG00000089472.12	2181	2316	57	1727	11	8	14	10	2	0	0	3
ENSG00000089486.12	1440	1676	1855	1295	1626	1793	3072	5870	619	886	1171	1786
ENSG00000089505.13	76	82	77	56	34	23	41	37	72	68	49	111
ENSG00000089558.4	0	0	1	8	5	4	14	21	0	0	2	3
ENSG00000089597.12	13431	10764	12435	9330	4943	3967	7349	5412	16943	14389	16054	18070
ENSG00000089639.6	653	574	716	479	362	458	516	719	378	564	870	569
ENSG00000089682.12	907	550	994	520	829	865	1465	957	1143	948	762	810
ENSG00000089685.10	126	16	120	49	449	2011	5525	1962	712	3160	4470	4647
ENSG00000089692.4	0	0	1	0	0	3	3	9	4	5	2	6
ENSG00000089693.6	3757	3995	4486	3151	2798	2280	4051	2671	4085	2535	3492	4268
ENSG00000089723.5	1225	858	3731	1132	345	71	297	292	502	127	384	297
ENSG00000089737.11	5082	5839	9617	6029	4828	2366	4886	3609	3412	2020	2265	2634
ENSG00000089775.7	980	628	1056	532	422	335	740	572	778	738	1112	1171
ENSG00000089818.12	1830	1380	1687	1177	754	347	1347	1781	1267	462	989	1100
ENSG00000089820.11	96	100	275	100	107	78	186	254	64	45	78	70
ENSG00000089847.8	51	39	28	60	103	115	107	178	37	122	235	124
ENSG00000089876.7	2054	1744	3379	1721	1509	1873	2671	2875	3038	3225	2412	2958
ENSG00000089902.8	1654	1170	1941	1226	163	405	934	969	378	967	1182	1575
ENSG00000089916.13	4805	3018	5160	2787	2164	1618	2646	2109	3124	2551	3252	2781
ENSG00000090006.13	422	320	476	411	694	634	1398	2389	544	835	2205	2454
ENSG00000090013.5	1015	901	1285	884	2892	3881	5764	9087	1346	2632	4260	3781
ENSG00000090020.6	435	448	637	339	140	139	167	369	342	456	154	130
ENSG00000090054.9	4429	2701	4424	3122	4113	2915	4784	4047	5210	3142	3384	3848
ENSG00000090060.13	6524	3843	7060	3928	2461	2735	4983	3214	4844	3653	2898	3566
ENSG00000090061.13	469	286	457	198	110	167	220	134	201	263	228	267
ENSG00000090097.16	1057	1295	1471	967	542	337	508	721	1988	742	484	583
ENSG00000090104.7	0	0	0	0	0	0	0	0	0	0	0	0
ENSG00000090238.7	767	621	478	437	464	150	225	313	266	123	297	337
ENSG00000090263.11	1436	1411	1398	1190	2180	1830	2374	2249	2054	1597	1436	1367
ENSG00000090266.8	2428	3452	4163	2975	2733	2100	3465	2938	3389	2307	1692	2338
ENSG00000090273.9	3052	2508	3488	2477	1931	1843	3029	2103	4986	3755	1626	2759
ENSG00000090316.11	4513	2413	4388	2889	2722	1715	2726	2078	4650	3632	2135	3265
ENSG00000090339.4	6165	2690	10950	3028	19028	5759	10698	13392	10017	8600	11003	9622
ENSG00000090372.10	3100	2571	3123	2176	2217	1601	2346	2840	3615	2485	1764	2119
ENSG00000090376.4	870	594	1349	585	4	6	8	15	1	2	3	0
ENSG00000090382.2	4	1	4	1	2	2	4	0	0	0	0	0
ENSG00000090402.3	0	0	0	3	1	1	0	1	0	0	0	0
ENSG00000090432.5	2130	1242	2312	1413	596	781	1116	933	1627	1283	1084	1471
ENSG00000090447.7	130	174	192	114	384	392	628	190	474	678	473	499
ENSG00000090470.10	817	469	811	553	259	343	576	401	968	985	951	1073
ENSG00000090487.6	2557	1841	2834	1900	615	993	2041	2083	1245	1641	1982	2005
ENSG00000090512.7	0	1	0	0	3	1	4	5	2	0	0	0
ENSG00000090520.6	3756	2740	2846	2590	2032	1378	3079	2551	3299	2012	1769	2083
ENSG00000090530.5	2561	2011	2915	1832	15234	11667	17091	13656	9691	9785	7802	7759
ENSG00000090534.13	1	2	25	3	3	3	9	19	0	0	0	1
ENSG00000090539.11	238	216	1502	380	55	16	37	65	1	2	1	3
ENSG00000090554.8	26	33	6	23	37	25	37	64	17	35	31	23
ENSG00000090565.11	1502	1046	1725	967	346	413	593	1319	1933	1747	1615	1956
ENSG00000090581.5	2639	2163	2892	1849	758	716	1090	1714	1736	1582	1683	2234
ENSG00000090612.16	1538	1052	1605	956	1050	1019	1725	1798	1170	851	710	991
ENSG00000090615.8	13902	8337	10868	9275	8398	6792	12981	9319	9775	7233	8320	8535
ENSG00000090621.9	7358	6561	6525	5600	1692	3195	4884	2498	5304	5890	7057	7521
ENSG00000090659.13	4	3	33	3	28	11	18	10	0	5	0	0
ENSG00000090661.7	208	257	662	167	754	514	699	945	52	29	40	7
ENSG00000090674.11	710	540	739	447	123	219	372	428	230	312	164	175
ENSG00000090686.11	3447	2155	2983	2028	1459	1104	1977	1136	3429	2821	3213	3540
ENSG00000090776.5	1759	1421	2197	1555	4040	869	2320	1687	314	210	221	221
ENSG00000090857.9	1315	718	1462	832	1371	975	1765	1708	2341	2735	2488	2786
ENSG00000090861.11	7511	6037	6737	6128	3428	6043	12208	24793	11776	19692	19188	19290
ENSG00000090863.7	10195	6246	7357	6119	4344	3162	6287	6398	11812	9644	7174	8956
ENSG00000090889.10	61	17	82	31	388	977	2782	891	1512	1563	1870	2487
ENSG00000090905.13	5538	2265	2948	2111	4189	4848	5487	5123	5246	4289	2272	2837
ENSG00000090920.9	33	44	22	25	92	88	107	232	11	7	57	71
ENSG00000090924.10	933	1101	984	924	274	314	546	605	778	732	921	1062
ENSG00000090932.6	25	38	19	31	66	53	103	115	1	0	2	2
ENSG00000090971.4	449	809	771	581	1129	917	1318	1047	600	552	318	495
ENSG00000090975.8	239	192	331	179	522	599	740	888	1085	782	1089	1358
ENSG00000090989.13	3602	2825	3829	2368	1548	2175	2616	2921	3323	3629	2894	2825
ENSG00000091009.6	3849	2276	3383	2076	1945	2207	3493	2194	4919	3796	2205	2872
ENSG00000091010.4	0	0	0	0	0	2	1	1	2	0	0	0
ENSG00000091039.12	10153	4924	5793	4476	2271	1653	4691	2656	8265	4314	3757	4980
ENSG00000091073.15	287	210	192	149	1014	698	1482	2189	565	532	577	594
ENSG00000091106.14	1	1	1	2	3	0	0	3	0	1	7	2
ENSG00000091127.9	865	656	914	742	774	850	1877	1016	2097	1903	1071	1473
ENSG00000091128.8	21	10	30	6	66	24	52	20	11	16	31	30
ENSG00000091129.15	7769	4012	18148	4633	3987	4264	3025	2230	2608	1752	707	607
ENSG00000091136.9	31212	24239	29120	21748	18025	9913	25200	15565	47870	32902	36293	34779
ENSG00000091137.7	15	9	28	10	48	28	102	74	48	40	118	62
ENSG00000091138.8	4	0	0	0	1	0	0	0	4	1	0	0
ENSG00000091140.8	3383	2619	4650	2551	4428	4721	7269	6988	4793	3950	2198	2943
ENSG00000091157.9	1713	935	1472	946	293	488	671	700	925	885	555	641
ENSG00000091164.8	2424	1467	2748	1728	886	1181	1892	1648	1899	1311	1050	1324
ENSG00000091181.15	0	0	0	0	0	0	0	0	0	0	0	0
ENSG00000091262.10	36	66	141	37	37	15	56	96	45	9	67	139
ENSG00000091317.7	8819	4220	6069	3854	3911	1730	4867	1710	4708	1847	1117	1826
ENSG00000091409.10	2657	1041	4303	1760	2764	2108	2683	1391	3139	3051	1756	1859
ENSG00000091428.13	64	70	6	38	7	13	33	6	5	4	2	3
ENSG00000091436.12	4025	2310	3272	2402	2606	3381	6075	5302	3386	5910	6098	6523
ENSG00000091482.5	1	0	1	0	7	16	40	36	0	5	1	3
ENSG00000091483.6	3004	2478	2911	2296	1751	2009	3808	3039	3936	2943	1852	2297
ENSG00000091490.6	8247	6804	7376	6586	11632	12410	17634	13265	10120	14600	8688	9478
ENSG00000091513.10	4	3	1	0	11	9	12	24	7	17	184	111
ENSG00000091527.11	16233	12071	20654	10831	12268	9574	19770	26983	7715	7570	6837	9103
ENSG00000091536.12	12	7	31	5	29	9	19	56	4	0	12	6
ENSG00000091542.8	5461	3966	5185	3871	3738	3541	6662	5299	5820	5592	5362	5107
ENSG00000091583.6	0	0	0	0	5	1	3	4	23	4	8	22
ENSG00000091592.11	1931	1692	258	1395	133	181	176	171	1186	1985	1718	1124
ENSG00000091622.11	316	179	941	438	567	753	1683	2519	286	436	447	295
ENSG00000091640.3	1991	1783	2931	1878	899	738	1065	1044	1009	745	854	1010
ENSG00000091651.4	197	98	251	124	222	804	1177	415	423	789	415	695
ENSG00000091656.11	1079	1133	853	704	322	332	687	713	2877	2274	2949	3972
ENSG00000091664.7	1	0	0	0	0	0	0	0	0	0	0	0
ENSG00000091704.5	2	0	0	0	0	0	0	0	0	0	0	0
ENSG00000091732.11	1029	879	1426	733	1186	897	1684	1316	1751	1198	1570	1851
ENSG00000091831.17	15	20	2	5	0	0	0	0	7	3	0	0
ENSG00000091844.3	470	265	503	232	243	347	673	970	546	297	558	399
ENSG00000091879.9	11	3	24	5	0	2	0	1	0	0	0	0
ENSG00000091947.5	973	481	784	552	796	620	1050	1058	1633	1363	1800	1325
ENSG00000091972.14	877	459	636	547	5	6	13	4	7	0	5	12
ENSG00000091986.11	36651	24924	10915	27516	3130	2915	4587	4531	2359	3641	1600	2964
ENSG00000092009.6	0	0	0	0	0	0	0	0	0	0	0	0
ENSG00000092010.10	2213	3601	5323	3252	3009	2496	5261	3626	4405	3082	5130	6127
ENSG00000092020.6	1260	901	1262	646	322	282	399	483	750	718	730	725
ENSG00000092036.12	232	263	343	273	71	166	371	163	196	407	900	891
ENSG00000092051.12	0	6	0	0	0	0	0	0	1	0	1	0
ENSG00000092054.12	0	0	0	2	0	0	0	0	0	0	0	0
ENSG00000092067.5	0	0	0	0	0	0	0	0	0	0	0	0
ENSG00000092068.14	53	93	905	79	50	25	54	43	9	1	8	7
ENSG00000092094.6	782	590	893	651	359	372	648	439	606	521	570	634
ENSG00000092096.10	591	587	277	536	73	45	156	175	17	18	23	21
ENSG00000092098.12	509	423	774	556	268	353	660	462	432	495	399	585
ENSG00000092108.16	5018	2869	4271	3095	908	1147	1713	1729	1713	1360	1197	1420
ENSG00000092140.10	1407	761	731	645	347	717	1435	620	794	794	879	897
ENSG00000092148.8	16162	12022	21156	11715	5070	6673	10386	10058	5906	5190	4993	6074
ENSG00000092199.13	21643	15612	21370	14765	10224	9470	19318	20018	15695	12967	16412	16955
ENSG00000092200.8	0	2	3	0	1	1	0	1	0	0	0	0
ENSG00000092201.5	7305	5892	7997	5526	2818	3154	6456	3709	4402	4944	3589	4594
ENSG00000092203.9	4399	2724	4393	2701	1486	1160	1863	1377	2332	1707	1920	2266
ENSG00000092208.12	427	334	322	317	121	168	312	247	197	273	321	324
ENSG00000092295.7	74	51	81	57	19	17	17	13	11	20	29	9
ENSG00000092330.11	2330	2326	2824	1706	707	712	930	936	784	941	1026	1145
ENSG00000092345.9	1	0	2	2	0	0	0	0	0	0	0	0
ENSG00000092377.9	0	0	0	0	0	0	0	0	0	2	0	1
ENSG00000092421.12	176	205	529	141	19	4	11	23	2141	943	3102	5082
ENSG00000092439.9	6059	3320	5597	3340	3664	3278	6409	6238	5512	3767	4731	4510
ENSG00000092445.7	459	299	876	324	826	764	1552	1840	1229	1381	1032	938
ENSG00000092470.7	166	94	218	95	34	180	398	59	405	1396	571	1139
ENSG00000092529.18	33	24	16	16	6	5	16	16	4	3	15	8
ENSG00000092531.5	4172	2474	3281	2330	2515	2141	2842	2127	3874	2674	2049	2121
ENSG00000092607.9	9	6	32	8	21	24	61	63	363	542	617	694
ENSG00000092621.7	2189	4018	1023	3541	1178	2111	7071	4596	1	10	1	6
ENSG00000092758.11	15	6	9	5	0	0	1	5	4	0	1	2
ENSG00000092820.13	14848	9262	41081	11355	1389	5579	7250	4729	2816	4867	5560	8688
[truncated: 55,826 more rows]
