# Supplementary material for: NFIB promotes the migration and progression of kidney renal clear cell carcinoma by regulating PINK1 transcription
Source: PeerJ. 2021 Apr 23;9:e10848. doi: 10.7717/peerj.10848 (PMC8074839; doi:10.7717/peerj.10848)
Supplement: Supplemental Information 3 [file peerj-09-10848-s003.xlsx]

## Sheet: GSE53757_series_matrix
ID_REF	GSM1300062	GSM1300063	GSM1300064	GSM1300065	GSM1300066	GSM1300067	GSM1300068	GSM1300069	GSM1300070	GSM1300071	GSM1300072	GSM1300073	GSM1300074	GSM1300075	GSM1300076	GSM1300077	GSM1300078	GSM1300079	GSM1300080	GSM1300081	GSM1300082	GSM1300083	GSM1300084	GSM1300085	GSM1300086	GSM1300087	GSM1300088	GSM1300089	GSM1300090	GSM1300091	GSM1300092	GSM1300093	GSM1300094	GSM1300095	GSM1300096	GSM1300097	GSM1300098	GSM1300099	GSM1300100	GSM1300101	GSM1300102	GSM1300103	GSM1300104	GSM1300105	GSM1300106	GSM1300107	GSM1300108	GSM1300109	GSM1300110
1007_s_at	2327.13	3346.01	2178.4	2785.52	2865.29	2565.55	1760.03	2060.9	4718.39	3259.35	2551.04	4121.65	2754.9	3481.74	4127.19	3297.53	2840.25	1818.67	2370.06	2805.45	3633.48	2769.63	3372.56	2545.05	2987.49	3289.48	3585.84	3926.84	2627.6	2418.83	3698.52	3085.92	2119.61	1866.7	2988.93	3830.8	2241.07	3185.85	2947.3	2605.16	3290.37	3320.36	2629.72	2545.25	3663.94	3013.09	2450.38	2805.27	1916.15
1053_at	733.848	458.739	552.729	248.752	593.087	333.783	1015.61	293.663	470.157	300.754	635.369	364.635	701.946	328.582	570.846	316.908	579.622	306.976	560.564	318.835	660.866	331.621	612.165	292.932	972.46	415.153	382.175	321.615	534.442	365.16	401.78	275.654	576.108	356.964	554.409	373.114	573.812	288.76	596.238	365.179	438.893	278.062	709.392	305.556	771.431	358.828	622.08	388.146	628.401
117_at	287.425	110.829	532.736	74.4019	224.177	610.704	551.254	72.7579	276.445	121.585	315.419	128.737	503.692	93.3752	669.201	210.185	238.47	193.976	252.922	132.031	446.377	223.406	751.1	81.5526	364.866	125.298	192.68	182.425	823.572	125.297	307.191	166.522	218.521	66.4549	269.019	216.397	387.711	119.097	411.408	25.5883	271.338	119.359	272.359	118.763	478.44	150.637	362.307	139.761	312.754
121_at	2344.18	5662.03	2026.05	5347.32	3235.3	3489.15	1239.21	4261.38	5298.38	6207.26	1648.22	6738.34	1687.2	8990.36	1717.29	4735.27	2025.94	5460.56	1634.04	5900.76	2413.81	5422.02	2233.93	4522.82	2686.34	4732.64	3147.57	5669.15	2213.32	4915.34	2307.03	5916.84	1940.05	4531.79	2263.1	5383.61	1716.87	4814.11	1417.35	3819.81	2375.28	5115.34	1385.39	4234.7	1810.48	4097.99	1567.49	3703.32	2419.61
1255_g_at	7.24601	69.1623	47.7668	57.4092	8.50806	39.0743	14.6936	27.9241	4.76133	24.782	31.6466	32.9523	29.1312	36.6786	8.02451	5.30771	27.2084	9.33615	4.13097	28.3886	8.71206	42.2201	8.04977	14.1546	27.6193	17.2095	11.8036	36.6788	28.5027	15.1966	163.889	37.8291	4.57184	7.72075	10.2838	24.3006	18.724	41.5383	24.0213	5.80387	20.4776	8.64348	6.2186	3.81681	32.8922	9.43053	33.6631	35.0519	5.14303
1294_at	584.282	642.599	937.348	711.78	773.321	1079.87	470.144	393.028	523.816	574.569	848.535	767.844	1074.8	543.839	804.995	581.183	801.401	644.762	866.661	553.895	722.843	595.195	1190.69	566.179	683.316	642.092	610.232	703.939	1044.63	435.476	1051.64	531.46	599.659	407.518	562.569	625.97	731.159	604.025	1062.13	520.527	504.791	389.467	770.457	599.776	642.675	554.558	693.866	517.242	531.58
1316_at	160.461	278.22	132.354	382.819	191.954	168.174	124.903	219.739	97.9099	189.665	156.645	244.154	152.486	208.019	151.38	89.2084	130.455	128.555	109.331	134.601	216.755	181.922	197.347	232.882	88.4138	301.396	161.734	271.091	122.882	108.775	1355	150.515	153.915	184.628	177.771	105.841	105.4	123.345	161.268	137.337	114.254	152.36	100.73	61.0065	186.848	132.657	215.668	122.142	182.313
1320_at	83.04	49.2772	9.87058	26.8537	51.047	101.917	43.7204	65.6681	103.712	44.9343	12.9443	98.7548	13.6846	107.954	28.0523	77.3085	24.7268	98.9227	42.8373	58.3901	63.3151	121.155	16.4125	110.718	10.7471	16.7766	71.4039	115.764	68.8551	88.0849	106.288	87.3541	61.6148	53.3125	81.4389	93.7524	73.1796	73.7992	83.8678	92.1416	53.8147	94.265	37.9796	129.89	53.5097	94.5442	77.4251	65.6422	10.0154
1405_i_at	1330.38	546.288	6879.59	180.34	936.831	3639.73	1234.52	131.71	559.57	211.83	1897.16	290.897	5970.98	105.528	5643.5	419.927	1446.38	348.916	2588.78	223.208	1166.81	324.684	14048.4	174.026	842.049	167.321	1258.59	700.077	6859.43	491.889	1115	460.822	487.985	29.392	3690.41	989.801	515.843	369.7	987.641	180.507	703.838	103.778	1312.64	373.774	1044.6	137.168	1030.77	197.019	498.446
1431_at	71.3398	78.5893	58.4168	335.825	69.5773	88.3014	263.418	800.458	65.3179	119.785	154.206	432.583	109.331	964.047	60.3371	82.7478	98.1722	128.28	75.5504	143.635	152.998	140.996	123.806	143.983	86.6523	195.319	91.89	119.52	66.1921	72.1947	241.594	102.5	114.913	135.462	93.2394	302.616	68.3295	189.849	106.949	253.246	66.1096	139.768	114.146	281.352	78.7184	29.7024	66.1684	588.724	72.2747
1438_at	71.8795	219.885	52.8028	39.8427	56.2479	61.1446	142.937	139.444	13.5118	22.6709	95.0545	62.6704	15.2441	73.9552	27.1448	63.3683	69.6016	93.4075	59.8535	159.919	155.794	137.408	13.499	98.2325	53.7299	40.916	16.2452	37.05	24.6307	27.4948	184.059	17.9953	30.5869	22.8641	62.7416	28.6988	42.5553	10.5963	61.9796	84.8608	67.1081	49.9757	50.0431	68.624	89.6265	16.9058	30.4786	70.8158	84.3111
1487_at	787.923	1705.15	1044.85	1987.73	921.988	822.346	1418.84	1668.29	1778.11	1803.58	939.407	2200.82	952.224	1640.66	1014.09	1813.63	768.946	1799.91	761.18	1931.61	863.36	2718.71	1134.23	2315.16	1009.34	1542.8	1221.33	1417.35	876.705	1638.23	352.633	1494.21	841.333	1866.31	774.517	1126.13	858.257	1422.25	595.058	1556.01	1052.24	1637.98	947.471	1879.82	815.784	1841.28	636.536	1477.22	942.704
1494_f_at	91.5164	111.778	71.2881	104.742	88.6139	64.3453	94.1716	172.523	100.734	185.738	117.303	149.697	133.013	129.436	122.337	122.011	115.538	128.91	105	157.383	151.448	205.919	184.844	88.1787	130.062	145.407	146.096	101.568	59.8293	99.2372	257.97	81.9494	112.153	106.11	111.805	129.505	87.5806	115.469	102.945	112.464	148.64	174.939	169.663	116.883	82.9128	116.938	168.724	159.343	63.8793
1552256_a_at	3215.15	283.416	1196.48	330.11	420.479	442.975	3994.67	317.398	412.774	279.738	6654.21	211.598	5757.01	206.999	2568.71	360.798	2596.45	279.607	4523.47	254.425	4247.57	457.458	2607.65	334.501	1337.17	183.473	304.258	180.964	1001.21	237.271	1506.57	168.399	1387.29	214.934	1249.66	274.555	933.329	231.412	2662.82	281.761	7881.84	269.17	2587.24	292.875	2095.04	279.102	2030.8	243.353	1936.76
1552257_a_at	727.418	784.043	538.444	510.967	536.955	671.145	833.945	580.947	621.973	768.149	752.24	870.586	670.533	719.278	749.548	880.641	569.399	600.401	476.424	643.907	940.479	666.131	598.655	592.132	651.965	531.85	475.263	714.685	542.958	620.55	1410.31	480.211	558.712	558.265	444.1	569.073	563.887	561.064	675.305	605.026	744.744	453.495	567.79	412.6	581.419	428.57	601.896	490.959	545.772
1552258_at	221.407	105.429	125.44	23.3677	168.093	123.464	163.308	61.8908	528.866	66.4305	175.122	66.763	233.468	158.249	163.344	36.1772	159.172	117.587	233.376	152.276	142.054	78.6137	159.478	96.1425	160.53	124.68	89.7504	129.894	105.007	85.9438	412.859	121.222	162.382	104.683	284.98	281.104	246.881	82.4864	159.406	100.899	111.517	115.499	179.382	96.0549	181.57	115.21	164.292	67.3618	182.508
1552261_at	71.5766	98.1873	126.475	172.756	190.898	349.354	169.798	126.848	66.5246	150.839	85.3769	317.038	109.311	174.172	63.3586	78.7061	91.3957	125.678	36.327	102.737	136.768	314.934	57.2483	145.932	201.69	316.346	207.834	286.223	74.8828	130.818	493.736	396.651	92.8403	203.979	99.4377	392.442	26.6255	218.342	40.4792	156.072	136.49	212.843	81.4288	237.711	129.084	172.919	169.912	96.6115	190.667
1552263_at	473.05	272.179	409.055	113.239	361.644	503.181	541.339	327.306	309.531	129.612	465.45	182.233	421.993	252.35	482.882	219.267	286.983	180.611	376.054	168.674	322.722	146.433	459.37	93.8367	303.773	237.725	268.854	167.227	511.906	173.19	496.677	281.122	273.698	162.579	486.904	323.401	381.529	145.017	303.041	146.511	328.935	254.258	367.72	281.918	287.576	125.736	319.881	152.182	379.789
1552264_a_at	628.73	381.442	393.125	377.058	455.722	339.329	503.517	403.272	397.054	378.327	471.619	431.14	438.448	328.555	487.743	296.954	486.601	271.568	492.299	233.741	463.817	459.137	447.286	246.263	455.665	123.293	350.105	274.301	373.06	297.3	748.487	382.004	462.355	340.995	543.048	392.579	500.48	245.464	350.515	280.875	385.374	338.548	420.772	236.456	284.357	373.494	616.592	332.577	487.236
1552266_at	28.5446	10.3547	26.8651	93.3498	75.1954	5.70515	13.0511	22.8195	34.1741	50.8096	58.0789	35.0483	66.4073	38.3553	45.8346	44.5	21.1198	9.76331	80.655	37.4104	8.2965	64.2523	55.8381	64.9242	51.542	39.6329	40.1223	52.5583	21.9096	27.0059	425.341	35.6474	56.5421	2.9576	16.5654	31.0474	40.3532	33.8994	6.8283	20.5994	69.7282	34.9981	17.1421	37.7248	36.9691	7.54686	31.8593	25.4376	17.7295
1552269_at	12.3789	120.94	59.7083	146.863	56.1666	62.1775	50.4289	158.907	35.3497	67.9249	61.1592	113.127	55.7127	86.3157	15.8291	116.444	85.8737	201.805	5.8102	83.1148	46.9515	97.4108	12.6598	199.042	82.5384	161.242	139.795	118.777	50.4104	115.329	237.4	134.644	4.97147	245.873	45.1721	70.9133	62.916	83.8622	44.7389	103.025	70.1561	119.967	116.482	331.858	48.9654	183.751	58.3002	82.6727	27.3841
1552271_at	35.4584	21.7359	19.3992	239.9	8.32151	10.4088	39.12	22.9579	15.3976	27.3303	24.6128	41.7065	25.9476	24.8563	15.3018	22.2322	12.7976	9.05795	15.4238	14.1892	17.4503	48.7188	21.3619	35.1316	16.9026	36.0469	17.4665	11.1437	22.7248	110.156	182.919	13.5366	23.8817	33.3185	16.5473	26.3009	23.065	16.7892	15.255	28.7053	35.1319	22.2323	11.2592	11.4774	14.2631	97.886	8.26448	22.7388	33.6737
1552272_a_at	183.371	146.676	116.846	149.44	90.0183	80.8994	66.8336	98.0209	129.377	207.897	110.456	278.657	216.183	149.637	116.42	89.4029	128.839	170.547	174.844	167.011	156.104	233.296	238.491	264.29	145.007	171.158	116.44	171.017	155.742	155.715	347.436	175.843	115.317	138.374	83.1814	129.366	68.6724	143.052	137.302	173.01	133.59	180.2	150.544	204.798	84.3769	228.627	83.6181	132.507	126.38
1552274_at	234.013	865.741	287.735	642.302	489.248	525.289	149.139	673.225	888.522	455.693	191.151	647.779	228.317	991.54	174.854	447.555	192.398	430	224.871	387.401	239.931	483.479	241.133	528.13	320.935	898.816	633.999	814.589	299.954	474.98	332.399	507.621	240.331	662.001	241.667	485.385	293.933	484.219	243.663	638.236	291.219	330.114	151.651	286.554	340.474	529.9	332.354	695.742	173.573
1552275_s_at	117.677	528.67	284.558	390.668	169.366	327.702	108.503	502.976	788.128	350.808	115.535	455.077	214.734	490.657	147.265	226.718	78.3469	121.681	132.71	384.332	45.8306	564.262	25.4448	291.01	161.929	341.494	275.468	290.656	100.871	422.847	447.005	244.058	196.75	251.272	72.9707	283.993	197.361	403.167	129.374	344.195	180.536	207.773	158.233	257.564	142.738	267.013	143.662	379.478	121.528
1552276_a_at	52.4635	224.738	67.6111	239.32	69.5199	49.4329	12.8782	110.472	104.282	120.465	83.7668	18.7012	136.011	32.7396	4.43374	28.6079	56.0518	26.6603	7.14764	98.8743	98.6131	12.7446	7.92317	176.136	22.9191	53.9474	114.078	73.1493	11.6387	85.2819	440.2	55.1556	133.999	9.32024	77.0274	22.9873	102.766	4.11746	61.1496	65.3445	2.73906	66.3998	58.7607	19.7988	33.162	115.297	23.3633	37.0392	101.746
1552277_a_at	1139.61	850.602	641.991	576.065	824.248	498.673	811.119	826.177	721.604	443.464	786.159	676.271	902.309	776.559	782.245	571.032	880.795	471.886	917.362	551.341	938.553	511.761	799.353	591.681	807.716	447.673	660.671	620.075	913.051	544.021	412.071	797.755	752.59	328.776	1148.57	982.892	1193.62	498.057	817.074	497.868	575.418	375.714	943.716	536.461	816.273	541.71	728.241	638.019	995.619
1552278_a_at	108.218	134.126	93.4019	358.763	129.636	123.197	80.9512	97.4683	61.9964	155.339	57.5899	114.204	37.0811	92.1178	140.634	165.807	158.116	208.124	121.016	130.571	124.524	299.3	200.676	217.768	98.2872	78.0904	13.6935	109.247	132.932	126.502	259.346	108.157	106.473	159.817	52.6172	94.5974	66.4584	177.825	59.4134	122.251	44.0245	179.832	88.9568	151.495	95.7828	153.987	126.547	118.542	159.101
1552279_a_at	286.677	352.797	259.799	433.28	211.125	256.36	307.608	387.739	271.945	273.676	172.622	340.478	287.255	279.141	311.045	328.683	337.613	305.567	241.836	299.467	325.262	282.406	435.475	441.474	226.087	249.113	307.775	264.482	312.551	187.045	738.537	170.278	338.464	359.286	201.257	94.6933	252.09	205.825	209.622	256.457	241.3	291.543	201.555	225.534	180.51	276.626	321.066	272.98	331.683
1552280_at	42.7146	60.652	154.046	50.5457	84.7079	323.168	332.533	113.926	808.226	49.5361	280.257	45.8442	206.721	71.7914	300.133	92.0869	113.12	46.2423	105.338	143.263	234.467	78.8685	289.88	88.8535	372.832	100.157	133.981	125.072	585.088	55.6069	338.7	78.277	386.155	71.0641	135.09	85.4498	232.118	132.029	96.8707	131.022	164.565	97.6628	340.731	92.9743	114.013	96.8963	223.869	35.191	111.578
1552281_at	576.229	464.996	591.78	3003.8	26.4047	236.22	1254.84	1885.11	18.673	3057.49	436.618	1860.83	663.319	1230.7	888.379	2857.72	749.741	2323.78	431.909	2046.69	340.371	4329.17	998.18	3890.34	999.287	1247.05	938.524	977.495	808.289	2312.6	747.588	1146.54	889.691	3246.96	508.844	1347.42	273.522	1538.19	140.901	2491.21	740.544	2686.77	415.594	2542.44	565.043	2583.3	706.126	2964.79	531.069
1552283_s_at	185.458	187.405	402.442	480.465	180.236	270.484	114.514	344.847	504.534	357.812	253.004	351.533	573.351	348.339	351.148	498.573	752.166	852.749	216.695	352.868	555.456	288.314	335.838	346.593	352.288	815.266	278.75	490.008	238.957	390.259	513.738	312.966	218.349	439.804	315.497	305.682	192.323	473.021	339.824	655.788	1117.34	682.933	292.366	502.413	184.425	514.902	867.899	1107.92	243.589
1552286_at	168.568	268.797	169.557	372.382	205.878	230.966	324.263	287.76	259.906	263.761	177.595	229.038	186.516	305.645	166.959	263.527	227.996	246.692	146	297.671	130.883	250.182	263.989	174.314	185.263	325.255	219.803	194.135	199.671	198.11	523.152	225.584	150.994	216.549	140.276	210.756	133.044	217.295	142.104	321.202	187.14	301.541	206.117	256.864	205.623	303.376	109.709	221.417	265.138
1552287_s_at	699.712	727.382	663.535	517.119	674.649	1230.3	498.886	486.881	655.703	394.16	1015.5	698.329	660.515	732.417	650.583	454.131	773.385	506.245	993.839	522.521	637.402	450.029	794.955	551.512	449.221	556.405	598.872	620.54	778.325	436.24	404.479	549.908	721.596	447.983	711.554	831.285	692.64	491.146	599.819	448.933	389.675	485.656	712.275	483.806	587.065	483.839	572.564	554.245	492.171
1552288_at	4.3615	4.50323	25.864	7.64978	13.4108	3.88548	1.25928	38.812	34.5665	8.6955	19.7232	13.2101	5.25208	49.0565	11.3252	31.059	5.80353	7.79959	1.75701	7.46281	5.86107	11.5381	10.9431	6.08013	7.52296	58.3968	3.25327	38.3324	20.8764	10.5189	112.945	44.7899	18.3412	29.4286	11.6859	4.35571	1.12483	6.2228	18.0448	21.5392	1.7114	13.3522	3.36652	11.5287	67.6566	29.8097	38.1748	10.69	14.7091
1552289_a_at	52.3157	20.2227	35.6202	111.41	19.5232	94.0169	23.1478	88.5994	58.6922	30.8129	32.9019	66.5938	14.0537	51.9946	4.18798	14.3989	17.8056	42.1367	2.51078	104.182	29.7226	73.7853	14.2865	65.8023	91.2741	137.588	80.6049	78.2663	5.0854	46.7745	177.83	4.7419	67.6318	122.045	44.4583	34.7846	9.98748	12.5869	46.8951	29.7122	12.2887	56.564	40.5361	42.0278	45.8895	40.4357	49.2305	14.1823	24.0287
1552291_at	1341.46	935.25	734.54	986.53	868.461	582.671	1082.34	1053.64	470.314	703.785	573.618	658.212	633.075	828.684	769.95	645.287	763.429	680.482	593.356	688.532	712.217	415.786	818.979	780.184	715.858	732.116	601.191	651.924	687.751	745.226	290.669	691.116	877.248	625.307	555.546	774.2	918.14	581.065	460.603	795.744	674.277	785.309	526.881	861.451	558.21	606.1	895.052	673.143	640.695
1552293_at	13.6599	106.484	23.2377	89.9177	7.71443	56.9458	18.1134	18.9219	10.9336	7.10249	10.4969	21.2003	47.9792	9.5763	7.13898	8.81169	8.62018	97.5731	21.5512	49.7235	15.9861	9.74687	26.3151	43.1959	13.602	18.0604	69.1236	11.455	10.9928	13.1616	246.915	22.5164	13.0694	19.9238	7.17277	13.6102	45.6506	21.5525	11.5055	15.2096	16.8791	14.571	15.9501	38.0407	19.9034	10.1715	34.747	8.98315	13.5819
1552295_a_at	435.741	600.141	462.794	514.934	625.83	626.519	437.916	686.9	1233.27	765.726	612.221	811.877	386.014	1035.86	470.165	425.043	267.515	393.102	399.464	469.093	637.723	691.351	595.971	618.334	353.196	386.332	470.279	588.824	456.509	403.256	775.091	426.894	377.815	394.593	357.14	467.372	357.209	531.877	414.209	371.89	308.605	437.996	336.295	377.94	252.018	375.495	408.767	507.564	531.375
1552296_at	267.571	7.72917	8.80567	20.4985	120.436	15.9204	160.958	7.55525	24.9612	29.2933	50.667	9.91209	104.948	42.4055	47.4383	7.60407	108.837	8.8047	17.3685	16.9421	374.678	9.81679	25.6708	43.1567	56.068	12.1189	8.94064	55.4076	15.1003	8.93634	247.217	6.92583	15.3193	16.6499	38.1046	8.36231	371.222	19.5252	198.004	9.69019	117.796	10.9418	525.877	9.16761	159.123	69.4527	18.7266	16.9249	95.2954
1552299_at	99.5922	125.414	54.2376	223.76	135.059	120.04	77.0819	194.957	53.7508	111.272	46.4136	92.21	69.2043	79.6747	32.8679	38.0052	93.9248	125.568	68.1367	141.354	27.8812	128.308	149.601	132.343	50.2102	15.3093	48.4912	18.0916	100.225	113.955	159.066	71.3946	20.0434	135.344	93.2909	86.2385	48.5447	167.456	65.4915	70.3976	76.3325	133.983	77.4125	51.8761	22.0506	81.4084	114.456	97.623	69.7989
1552301_a_at	114.625	213.313	143.438	219.895	173.961	158.957	116.482	131.405	66.91	124.708	61.3058	106.219	87.0425	174.934	106.499	85.7413	84.9618	93.165	53.5166	162.234	84.4381	222.096	156.55	156.863	70.1151	129.421	67.2645	107.616	82.6858	131.893	176.871	102.329	150.298	169.459	127.655	81.5759	74.5011	133.627	66.2163	140.413	104.135	76.6899	72.0793	100.609	82.8901	164.988	141.586	138.187	112.909
1552302_at	1033.64	1499.61	1252.8	3243.55	364.024	797.876	837.248	1627.08	254.522	1692.97	984.893	1855.43	954.992	1065.93	1223.69	2281.06	1435.79	3312.06	836.014	1952.33	1488.45	2802.42	1643.36	4874.22	748.692	3624.09	1983.24	2602.74	1009.7	1535.17	1094.08	1735.11	1563.07	3590.04	852.055	748.474	970.469	1984.33	704.927	2499.59	1110.01	1735.28	814.644	1727.04	1232.06	2127.86	1076	2242.28	1201.6
1552303_a_at	435.758	405.224	637.221	1453.88	245.697	415.642	427.34	690.487	174.259	814.563	473.226	791.84	572.581	484.68	603.248	1151.93	616.013	1490.55	413.594	978.256	732.538	1145.31	998.517	2208.32	447.05	1342.72	799.253	1031.36	692.13	833.681	301.568	686.523	644.791	2117.53	515.14	458.057	546.971	917.635	460.462	1285.22	569.352	830.236	364.821	929.431	526.319	1114.72	595.284	997.146	471.344
1552304_at	82.7936	57.6962	41.2379	43.6144	68.7818	47.8489	48.666	32.4852	52.3023	69.4107	54.6772	27.2584	56.6966	63.0015	45.7107	68.5361	69.8679	59.5239	48.4924	42.8839	37.5142	37.3773	9.70535	89.9882	65.2392	25.3298	60.9255	57.0351	52.2707	104.524	269.462	66.7741	58.5974	62.3183	13.7351	28.7221	29.9985	52.4443	71.5556	28.2048	35.7892	98.4765	51.0221	63.9298	98.0255	77.7553	71.0133	79.0632	77.3529
1552306_at	70.3283	101.642	201.499	55.0656	44.8504	129.778	148.9	82.4528	111.269	77.0935	128.266	96.052	98.2058	107.305	140.656	109.37	88.5695	84.0366	120.652	100.811	70.1708	90.9513	117.345	108.54	112.01	63.1262	83.6042	133.627	110.72	95.3329	149.212	20.5517	158.337	124.273	144.1	153.584	118.273	81.2108	94.8178	61.2334	119.636	150.732	141.911	95.3814	77.1823	81.12	165.641	127.206	143.295
1552307_a_at	77.1764	199.621	136.629	154.942	244.219	225.151	246.698	150.524	142.388	138.972	108.206	134.396	228.559	68.916	135.38	136.57	63.1981	123.987	103.691	155.509	139.831	138.946	223.199	121.728	197.081	150.56	224.135	101.001	204.003	72.6088	80.1309	155.335	126.47	38.5755	82.4418	112.693	134.701	119.523	113.406	55.0436	42.4823	140.641	158.077	80.3536	190.689	139.298	156.501	85.4567	102.808
1552309_a_at	332.935	635.934	1833.81	496.118	1488.9	910.265	299.322	664.703	1249.2	571.795	247.318	450.773	431.302	466.33	369.844	640.535	537.729	415.099	415.666	634.638	286.307	628.002	242.578	528.693	990.834	718.274	1549.63	1071.05	277.445	610.147	413.031	557.685	437.008	380	447.434	640.019	509.46	794.828	618.206	476.398	830.455	644.071	425.356	663.81	799.367	443.099	413.533	550.831	700.489
1552310_at	652.764	1207.69	787.928	777.353	771.328	886.673	720.376	1314.51	924.835	889.057	643.583	1228.67	836.957	1219.41	843.125	1048.45	558.979	637.804	498.122	782.212	696.666	825.47	859.71	1129.03	853.579	1033.7	914.053	897.284	704.913	1116.21	2246.84	1097.95	916.371	1142.34	532.711	688.572	748.558	1157.55	691.786	1100.05	914.777	1052.73	952.986	1048.98	697.488	828.715	698.175	1175.54	571.845
1552311_a_at	14.7182	412.337	28.324	354.155	138.164	186.409	222.895	256.858	219.836	327.985	215.974	338.672	74.5386	237.164	26.4387	258.214	158.254	40.7675	147.518	375.658	154.091	376.333	194.59	321.272	257.152	429.928	273.895	310.235	203.782	355.954	254.379	219.367	90.1166	444.79	169.25	218.069	188.855	194.036	141.358	365.983	103.974	476.185	136.839	357.188	93.0132	184.001	164.807	204.063	63.114
1552312_a_at	191.086	139.248	188.769	123.225	138.825	118.672	104.296	98.6481	169.992	95.3259	219.562	63.7708	222.883	162.27	222.514	132.518	134.057	122.657	172.452	96.2638	195.361	67.4015	163.629	109.586	127.443	39.3126	77.6588	105.795	177.878	129.302	270.213	70.9743	238.406	103.418	246.798	164.334	232.674	112.484	178.329	113.497	175.022	128.668	149.168	122.097	65.8193	81.5628	266.817	182.138	213.452
1552314_a_at	91.8106	63.4606	106.46	93.1874	92.4889	127.48	77.3617	82.956	35.6454	51.8095	87.0762	41.2011	66.3742	93.0208	83.7937	56.1593	68.5154	46.6825	38.0021	58.372	27.798	64.8077	58.5275	65.2117	66.3287	85.5083	83.4612	126.126	90.8119	108.496	439.209	76.5109	91.1065	129.669	69.9438	63.8869	65.6866	82.437	54.321	61.5491	69.9442	67.1381	51.8722	69.1141	59.5146	66.5281	128.428	66.3791	129.136
1552315_at	544.824	179.731	567.001	257.858	340.029	478.421	221.946	142.808	150.018	147.543	498.684	197.336	451.108	141.256	437.923	274.807	488.796	158.937	390.321	173.437	359.583	170.872	370.279	180.32	242.664	226.667	294.598	176.796	521.839	127.282	464.004	230.573	495.173	230.727	351.188	132.613	427.994	190.072	512.374	163.414	341.205	202.563	412.033	119.119	295.775	171.217	491.3	157.194	279.842
1552316_a_at	1276.24	510.108	1482.95	720.835	1306.89	1251.02	748.33	530.921	397.571	469.379	1418.45	466.154	1437.04	568.405	1033.92	574.128	1076.64	430.547	1071.85	394.872	1221.26	430.756	1165.82	407.058	758.2	769.696	772.91	588.899	1612.77	422.657	680.585	534.054	1608.35	571.538	1343.84	509.1	1723.72	518.077	1617.97	684.06	1268.85	468.789	1477.82	498.654	1009.83	308.163	1827.5	404.103	840.523
1552318_at	1040.7	405.404	1567.78	345.779	1004.4	1630.29	346.569	383.001	308.938	268.221	1476.1	256.031	1215.69	373.687	907.99	658.039	832.096	272.554	1149.75	287.825	1352.68	312.187	1408.45	468.059	709.221	584.755	613.533	462.963	1847.01	313.445	828.227	377.226	1881.75	321.157	468.976	252.253	967.628	355.236	1593.6	407.858	807.835	250.989	1089.21	323.671	970.473	363.745	1293.3	382.328	686.497
1552319_a_at	46.7367	70.3086	28.573	10.0367	15.898	11.1584	41.1829	43.1287	25.6668	24.571	12.5385	40.141	43.8193	26.7923	7.37867	16.015	65.828	32.347	11.7523	50.5138	9.06037	88.4512	55.4895	57.8999	26.3019	10.5003	35.9936	6.86085	47.9897	13.6232	434.469	57.684	17.5263	65.6292	54.6242	36.7991	26.2772	21.1225	38.1654	4.02713	36.666	85.3531	11.0405	33.891	9.13273	77.1103	34.4013	46.5398	31.6421
1552320_a_at	31.0933	66.7783	45.7521	14.1028	37.2373	146.935	16.2595	92.3794	27.2092	3.14966	32.9569	89.4587	52.233	36.0107	28.2759	28.6876	41.9323	43.0905	24.4031	38.8469	23.0425	96.2704	43.8858	80.0279	64.73	32.5708	51.9471	47.121	67.4389	40.1039	138.419	68.0639	39.9754	52.8841	35.2106	34.2181	19.6162	53.95	29.1668	70.8542	30.0452	38.2033	36.0287	52.4768	46.5983	47.4666	60.6687	26.8471	14.6848
1552321_a_at	5.77984	5.10309	5.02862	17.0614	7.88686	36.4704	10.6487	13.4033	1.77076	42.2476	4.42728	7.46867	7.70808	25.8501	32.92	9.48139	2.32965	3.28275	1.41786	5.17977	4.59261	5.84688	8.18801	36.988	4.67466	12.2183	5.36102	11.4106	32.6128	10.1948	298.094	13.417	6.39149	66.2894	3.76121	9.59384	4.8178	17.0762	5.18543	6.98132	1.90434	8.50328	11.9495	16.045	5.78922	6.57958	4.91445	65.4073	6.55501
1552322_at	3.44766	69.6175	25.9527	41.9589	59.5183	111.672	58.5181	52.3298	44.7769	43.3863	32.1346	42.8045	60.676	43.1566	26.2698	13.2101	39.9216	48.4385	31.4015	13.0194	26.7573	6.93403	71.8009	33.6946	34.6351	10.811	29.3033	54.9191	37.4132	7.35422	110.633	46.3063	39.9985	43.3506	32.1661	28.2376	24.3122	58.1766	16.3603	32.6266	60.0562	10.8725	49.8325	22.3398	57.3942	6.7348	66.8615	52.0841	28.4268
1552323_s_at	65.3727	107.321	104.663	90.2528	147.981	176.254	79.5301	115.83	148.661	72.3824	146.77	125.334	172.418	126.567	186.049	121.486	147.548	106.972	140.537	99.2643	121.096	79.6321	172.755	107.254	93.2212	154.228	105.381	109.522	199.085	96.855	441.187	145.612	172.947	94.9808	181.784	205.212	146.897	81.1249	122.364	84.2214	155.829	131.302	157.25	121.783	123.481	94.6949	190.563	59.8346	131.978
1552325_at	28.3226	22.8941	28.9461	0.821125	3.07098	33.3105	33.4938	31.724	9.77803	28.74	9.94179	9.0721	28.0286	26.3734	25.2574	31.2119	33.9503	25.1825	51.6959	40.8312	43.125	23.8496	35.7323	40.3739	57.4613	32.788	14.46	13.6779	26.8696	29.2567	267.364	10.8637	10.4137	26.7159	31.8246	43.2484	22.1611	1.40571	21.9179	54.6571	19.9754	29.7047	22.6966	25.9908	33.8329	61.637	57.2426	12.9294	83.5381
1552326_a_at	49.8004	170.538	91.0552	181.763	57.6899	171.512	221.654	142.688	37.983	142.63	79.8674	257.953	161.582	143.08	167.7	196.877	160.944	266.885	72.4918	128.164	51.3973	131.506	180.177	203.262	202.926	190.919	102.4	137.882	163.476	107.206	163.455	186.646	139.031	192.946	104.898	152.03	50.7785	133.792	95.7478	166.672	165.721	308.087	108.138	132.254	102.246	200.149	114.335	107.905	177.762
1552327_at	253.783	230.85	175.689	93.0277	209.931	349.069	137.305	256.321	155.938	174.452	293.846	210.827	277.228	207.346	297.699	149.069	190.859	149.536	224.469	254.547	321.933	99.7058	188.507	198.217	224.374	169.694	182.967	234.571	134.338	193.525	138.178	176.258	293.287	275.707	213.053	191.059	205.584	147.018	68.7726	74.1809	232.799	82.8649	162.682	149.845	174.333	120.388	243.891	262.598	285.111
1552329_at	496.405	326.016	413.398	304.364	509.405	518.623	313.479	471.781	1993.1	379.569	701.246	528.501	482.971	555.955	622.518	437.157	573.638	470.924	507.618	575.02	617.416	485.529	461.928	298.238	513.371	676.608	451.695	485.781	406.428	386.923	348.993	574.742	497.018	314.954	775.017	736.118	706.167	572.076	734.63	408.544	681.233	662.614	588.138	445.816	427.891	664.465	420.711	431.183	658.881
1552330_at	446.051	750.663	450.142	559.536	416.894	508.872	559.467	562.671	584.189	499.596	325.161	635.267	437.663	692.64	387.012	545.968	458.891	493.753	377.624	565.349	359.209	462.787	439.575	643.157	620.515	487.765	460.702	579.037	388.619	487.716	272.696	568.855	377.648	382.024	495.311	390.449	344.732	465.071	441.868	481.758	348.545	493.622	391.858	470.704	428.801	343.287	390.5	444.011	538.08
1552332_at	194.764	238.371	248.828	256.269	141.17	22.5749	126.622	68.8153	37.8471	69.3051	253.063	41.0781	304.935	54.4049	289.468	36.4581	123.624	47.2154	92.9581	48.6676	72.2451	54.2661	181.988	61.2265	123.51	36.5432	62.8373	28.0017	220.773	83.6668	390.098	80.7733	63.5407	42.667	48.6459	126.907	146.809	124.811	121.94	33.5653	32.942	57.4248	49.9761	75.6518	50.1834	68.5005	34.4097	32.5761	139.417
1552334_at	538.04	289.058	411.119	152.096	302.533	453.292	261.418	253.649	304.082	157.141	426.963	273.701	643.421	514.059	406.623	125.011	434.553	147.663	458.439	194.962	393.166	212.873	364.597	256.286	380.69	241.362	385.634	364.057	395.698	256.346	454.94	249.416	429.365	242.328	398.7	322.619	412.593	255.068	459.169	277.759	508.483	275.847	441.14	186.049	549.898	336.701	536.044	298.19	431.699
1552335_at	40.0572	5.67607	126.884	18.8454	67.7294	11.7271	55.0484	73.201	64.6157	40.3663	93.9449	18.0214	52.6269	20.8098	63.8309	42.6396	65.5124	23.3456	4.60499	14.1026	69.1	10.4513	46.5673	6.03721	81.2273	104.146	12.9479	12.8594	55.3794	20.9295	286.087	12.9155	22.1027	73.1766	70.9882	30.3513	60.9698	74.4039	64.1151	29.044	9.89984	4.62333	40.5492	4.47884	71.5986	52.1671	50.9107	16.2831	53.5492
1552337_s_at	173.789	327.477	127.575	254.981	74.8711	154.037	77.3889	349.687	215.823	235.48	357.606	415.615	136.982	337.07	280.316	205.857	160.398	171.877	238.194	107.356	268.724	271.643	63.0397	330.878	136.55	347.075	356.795	305.181	168.332	242.212	235.392	172.958	207.341	218.841	127.048	169.272	172.498	251.482	288.174	173.98	307.477	198.454	136.72	261.141	122.269	223.801	197.925	255.217	364.968
1552338_at	4.64965	6.81235	1.93461	6.94619	4.33739	3.24012	10.7301	3.72893	2.62629	3.59387	4.90104	11.2969	3.79929	5.84313	2.94015	2.86715	3.95584	3.56519	2.3166	3.30652	4.0368	5.03496	2.56727	7.77452	3.45093	4.63617	6.75594	4.31823	3.00014	3.39177	171.435	3.69561	4.104	6.84911	4.03292	3.42604	3.60754	3.22512	1.80065	6.38588	3.40401	4.82576	2.767	4.88605	4.45483	5.47836	3.7905	3.73236	5.81011
1552340_at	54.3728	58.694	7.88039	14.4166	53.7951	15.3549	13.5392	7.84834	60.6919	13.941	59.5226	10.6274	33.2437	7.59926	14.4123	5.62395	39.2186	6.12983	11.1291	5.90206	33.8212	5.26189	9.72462	16.7017	8.16732	25.3703	14.3879	10.2924	48.6362	24.6996	116.458	19.2797	16.4595	20.6529	38.883	17.5122	22.8914	45.7093	13.872	9.94261	7.59741	2.94029	5.85989	23.347	18.32	36.588	10.8899	13.4133	13.3209
1552343_s_at	320.714	287.428	362.224	296.681	300.221	583.136	518.685	389.845	156.81	467.927	221.174	242.131	325.554	178.974	311.781	384.79	631.613	578.732	198.965	382.51	378.036	315.189	555.523	339.359	201.873	669.855	275.339	293.037	500.61	385.016	161.717	572.105	455.182	677.134	303.631	210.742	321.087	330.852	329.456	398.273	561.182	832.763	226.686	433.997	521.218	671.415	487.929	671.688	331.804
1552344_s_at	401.454	430.436	332.433	353.697	318.834	397.819	186.179	451.575	336.024	250.761	272.988	297.69	388.087	439.71	505.175	433.659	296.137	279.05	305.386	229.398	345.719	335.713	433.875	321.618	461.641	357.735	361.211	252.203	477.18	445.612	474.328	454.39	374.817	348.109	347.301	341.983	515.071	380.032	215.309	418.658	306.565	359.97	272.194	379.588	353.807	338.856	484.417	392.755	438.398
1552347_at	1207.25	880.421	1084.69	889.97	1101.46	1303.89	825.867	715.744	578.27	656.401	671.983	678.555	1227.76	1067.45	1188.23	623.275	1114.36	741.663	949.068	874.761	1383.88	678.572	846.228	769.793	995.032	1035.67	1047.65	1127.47	1027.52	893.737	760.777	864.407	1123.31	944.38	1118.15	807.76	1171.34	909.731	940.019	846.432	1401.93	798.153	1267.75	653.302	1067.08	766.707	1243.51	888.545	1109.44
1552348_at	38.8634	75.8666	86.0451	33.7328	29.9217	19.2554	65.1797	53.2656	20.9365	14.8286	5.14054	11.717	20.5666	14.7724	12.0369	83.214	11.2384	69.65	79.0417	75.1245	39.2483	71.3462	12.3176	9.45201	18.3231	34.5004	20.3089	24.1895	12.7896	17.0672	230.641	11.4792	18.9761	18.2229	52.956	14.5163	32.9371	9.53384	15.6465	68.403	57.6048	6.28876	6.99066	22.1931	14.8798	16.3748	55.8847	18.9241	9.78693
1552349_a_at	56.0302	91.9181	54.7951	4.43495	27.4343	31.1722	32.1828	10.1517	4.69011	6.1587	27.0984	14.8304	4.07325	26.3753	25.0488	62.175	27.5466	4.40122	13.5747	6.80623	57.2097	11.9958	5.41784	22.5962	8.54165	5.59957	22.3095	43.9751	37.4137	12.1567	136.262	13.9855	17.473	14.0351	36.2442	41.8879	6.83079	28.4157	4.91983	14.1842	21.0767	86.9606	6.7419	27.6716	9.37952	57.6868	7.01507	9.4091	3.16022
1552354_at	12.3635	17.6827	8.06759	18.0371	13.6414	4.82633	13.5652	22.6585	14.041	16.3552	10.5869	20.9957	20.6191	14.9178	3.90149	10.7172	4.66039	18.4627	6.39189	10.144	10.1476	15.5144	7.21606	7.73486	9.75101	7.12315	10.6844	19.5536	10.9112	12.0156	44.8383	11.3943	11.8922	23.787	10.7903	13.572	11.6809	20.7387	9.51433	9.78241	8.89932	19.0267	5.15627	20.1262	13.8066	23.3448	13.3583	19.7094	13.202
1552355_s_at	23.317	63.5406	20.0301	18.3631	63.6747	9.43518	25.8697	17.4923	31.1291	16.545	9.42288	21.053	12.3241	27.1421	5.93924	16.9797	9.43103	12.7438	10.4742	7.13899	74.5978	11.5233	29.3402	70.2829	52.291	24.2281	159.581	82.0495	10.5733	12.984	51.6408	21.5815	25.3285	16.4045	29.4298	21.5097	9.06559	7.44115	18.4964	36.375	10.4472	51.3079	36.8368	9.13887	31.3746	13.1719	54.959	6.73094	15.5356
1552359_at	33.1049	55.9982	3.63155	5.88232	35.8506	30.6169	102.453	43.1424	2.12085	28.4374	0.91963	47.316	25.0515	62.0609	57.5427	26.702	54.3682	47.9721	4.70456	25.6667	41.8669	79.91	19.1136	57.7511	51.3342	89.0046	8.85249	26.7087	21.4456	37.6685	151.446	52.1342	65.8911	70.5959	34.573	28.5505	18.0498	35.0977	15.9857	2.58038	70.8214	33.4698	14.9778	26.6733	24.4458	52.1987	57.5601	32.6446	87.9805
1552360_a_at	206.943	149.758	225.191	212.232	217.584	191.029	111.507	213.735	196.051	226.246	278.708	187.564	276.643	219.841	348.7	239.439	309.291	202.541	234.913	253.4	313.547	200.125	284.304	256.416	185.365	201.9	214.743	220.461	240.138	210.271	590.467	247.824	306.794	232.688	230.693	139.492	245.746	202.381	302.275	231.017	296.666	173.645	336.009	147.748	233.371	101.366	277.298	293.687	207.859
1552362_a_at	469.287	578.211	377.416	1334.7	244.083	383.764	526.554	834.738	330.012	746.472	529.01	912.931	419.63	880.774	744.308	979.462	588.168	1580.53	418.695	1341.81	1110.22	3272.96	363.558	1391	732.517	857.422	1219.1	1481.14	450.182	770.937	372.003	930.377	832.739	1296.91	740.26	1513.75	444.441	1245.31	349.666	1964.3	709.796	2711.93	432.426	1369.99	318.726	978.139	435.534	942.792	767.257
1552364_s_at	68.0346	234.137	75.6184	108.727	91.4507	97.1092	107.347	201.48	287.246	118.684	81.9937	165.44	135.156	133.184	110.912	167.285	128.874	129.724	100.459	168.906	101.503	201.445	81.5315	144.325	110.132	230.29	124.907	181.818	92.8923	100.293	203.837	187.242	85.0499	151.892	95.8985	191.022	82.9912	172.139	58.3393	161.019	146.768	174.131	36.9101	136.584	98.5167	168.297	116.65	118.816	82.6818
1552365_at	207.436	5435.16	1832.22	2424.17	2591.5	2641.66	1355.49	2962.99	10009	2458.25	1558.85	4635.68	1965.59	5442.51	1847.51	2442.32	121.978	1303.32	71.1665	2768.57	3309.71	1957.87	1841.63	2514.61	2071.87	3356.27	2241.18	3521.71	2835.37	2626.02	448.744	3444.25	90.1501	1713.93	225.099	2560.1	824.114	3278.74	287.961	2552.49	330.735	3017.86	2537.55	2267.8	77.8193	2396.22	706.002	3157.53	2016.11
1552367_a_at	93.4546	3410.63	935.887	1687.67	1573.21	1139.98	684.269	2627.53	3537.77	1390.53	836.745	2183.4	1039.88	2850.36	717.038	1141.36	115.841	718.262	70.1688	1240.85	1419.71	1058.7	632.805	966.109	701.667	1892.7	1264.7	2000.85	1343.81	1283.65	468.629	1793.08	37.4018	1098.08	79.2578	1314.91	257.271	1636	123.484	1200.35	174.684	1694.28	1056.38	1219.8	64.4967	1289.09	346.391	1933.06	865.63
1552368_at	1.32394	1.76619	38.9244	87.736	32.4562	16.221	16.0785	33.5195	11.3157	21.2672	16.7706	27.461	17.5618	8.09495	3.64714	55.4422	7.94425	2.08489	34.3223	35.6391	30.5043	41.1676	3.37837	36.8527	41.9829	54.273	7.69828	14.0836	27.7999	67.4862	235.514	28.3129	25.4648	9.73849	3.43083	28.9007	21.6107	78.2378	30.2046	26.16	34.579	5.19225	4.19147	57.2222	40.9666	8.869	4.98571	29.7082	1.56239
1552370_at	524.341	510.484	726.901	487.966	276.552	407.128	482.464	806.139	319.882	377.729	531.438	624.524	497.333	613.523	395.606	354.075	670.332	449.277	331.12	289.922	663.246	514.519	545.811	282.208	390.461	429.636	443.769	402.146	368.271	398.834	533.989	532.473	105.876	322.007	514.912	517.767	859.677	838.606	364.967	497.337	424.374	625.626	383.714	584.984	439.789	409.924	313.757	570.918	474.893
1552372_at	1.78418	1.88791	19.7898	48.5584	1.77331	18.9964	27.2557	1.31928	0.634772	1.33482	0.628511	29.0002	1.39876	25.6076	4.91498	0.722056	7.19332	5.31086	1.97722	22.9102	39.4435	21.0955	7.36256	4.12223	0.632574	21.6338	11.0228	0.887293	17.5113	1.64575	79.9953	21.5076	1.35425	1.18918	2.15758	3.51378	0.63376	8.29555	6.16614	0.336718	9.48992	3.91287	10.2334	5.3717	3.63947	1.71732	35.7982	2.03694	1.70128
1552373_s_at	21.8791	23.0167	34.1418	7.14667	19.5824	6.82954	5.68352	64.9941	14.2698	16.3055	9.20174	41.1037	40.2312	4.76781	19.4796	17.0315	31.833	42.7174	3.85177	32.7596	60.428	6.80603	35.4456	71.649	31.0169	53.402	29.5344	11.0967	37.7419	61.4087	160.931	28.8067	13.5344	75.1219	36.3325	24.3626	36.2602	58.0666	11.4434	31.5027	29.7194	24.4658	44.3623	42.3034	36.7742	15.5381	34.6049	3.24903	60.8252
1552375_at	188.86	106.544	161.889	117.384	169.48	181.147	71.3009	123.449	66.8035	103.339	116.326	75.6111	253.912	129.933	187.894	84.3101	200.658	81.9799	126.068	67.3295	96.0592	94.2236	117.533	67.1849	102.362	158.641	76.8872	175.252	118.301	79.0257	287.789	114.796	189.394	113.5	170.773	104.149	166.785	96.5697	124.362	97.6562	191.839	90.3902	261.777	99.1581	156.541	97.3531	230.524	139.752	126.679
1552377_s_at	176.666	170.387	127.942	298.329	255.55	256.525	101.294	293.748	146.085	215.966	174.023	175.17	327.688	234.404	100.147	177.699	170.164	244.124	110.219	254.683	219.254	350.629	302.713	326.714	185.127	344.743	267.374	318.99	175.087	255.489	270.996	247.922	300.993	266.558	251.609	283.099	176.221	165.301	139.951	189.165	260.858	210.957	75.9033	276.565	99.6175	199.595	318.349	289.653	55.0734
1552378_s_at	154.939	621.754	207.835	454.405	165.181	79.7182	98.2965	421.358	74.4099	110.995	61.1312	155.631	93.2591	630.584	105.679	260.163	58.1674	211.829	80.9707	174.973	116.925	261.473	82.8256	184.252	65.5335	87.5316	102.079	235.195	77.8568	214.773	714.486	160.688	101.335	271.736	75.6034	302.528	73.4175	187.276	49.9264	215.895	86.5983	186.493	29.4532	157.685	57.8421	117.533	112.19	203.706	156.886
1552379_at	2.01621	19.6512	27.6008	13.8312	30.2448	1.37668	7.84613	9.14331	8.67942	44.6809	1.28507	17.6179	14.1853	2.71804	2.27924	27.7634	2.05501	2.59052	2.0964	25.4147	2.9637	10.0739	25.1481	47.5247	10.5235	4.89288	3.58644	31.3742	3.30196	2.55241	104.712	28.1895	5.79163	19.724	0.3671	1.56271	3.90644	3.40537	18.3908	1.82559	23.9426	3.58607	29.7221	28.8703	3.95464	25.7767	27.8478	19.408	43.3716
1552381_at	144.896	66.3798	69.5627	114.627	75.2616	69.0582	50.6676	64.4072	57.6994	73.9711	50.5944	72.4367	90.9104	64.8798	56.3534	42.9914	53.4494	56.2968	103.121	42.6487	61.9303	76.9495	42.2026	8.38475	29.7074	17.8692	77.6864	58.0932	49.8409	56.5156	281.387	81.0768	40.5641	42.5317	53.5669	129.69	66.1934	48.1275	28.5294	40.5482	137.411	73.0075	50.2529	54.1251	176.274	148.028	110.229	76.5727	10.3508
1552383_at	57.3325	80.5143	105.512	72.4923	199.238	135.351	103.606	125.512	106.126	120.848	103.086	145.937	176.349	151.436	71.6633	61.4013	109.576	153.48	74.529	176.851	90.1753	211.962	43.7571	24.7345	176.559	93.9403	92.702	196.42	112.345	121.42	349.353	130.837	169.695	58.1139	112.05	129.25	88.9393	20.0438	104.07	133.865	27.079	23.1968	118.039	137.988	102.599	44.3185	160.924	139.637	43.8315
1552384_a_at	12.1526	8.22167	68.2124	11.337	7.69599	49.1303	34.391	13.5157	29.6859	17.0415	92.9657	42.5936	49.4649	97.9398	72.2621	58.7394	32.9983	40.2576	53.3704	89.5205	53.9287	4.37111	99.9365	71.4503	49.1592	52.9897	70.2634	93.4327	75.6944	58.9508	389.127	91.516	67.3754	48.5985	88.1087	52.6303	13.4839	60.149	7.1978	9.5613	40.5675	71.04	53.2279	44.1334	70.2615	71.4325	69.5797	12.3752	6.37631
1552386_at	168.832	69.9435	351.521	116.722	120.34	306.363	352.282	63.7767	104.386	70.9656	97.3617	109.892	301.302	38.8132	186.738	133.433	183.63	127.222	77.5399	39.1078	178.364	71.9836	507.002	62.6424	210.528	101.608	101.59	64.9145	552.943	158.252	169.023	67.4518	149.227	45.7036	272.864	130.453	507.289	61.6995	411.321	112.629	154.776	116.922	230.425	72.6417	297.376	47.6695	255.32	33.9788	199.316
1552388_at	24.4099	78.3133	23.4813	14.9841	141.428	180.478	19.3438	9.17784	15.7112	28.9654	66.7898	35.2417	13.9062	38.3111	14.7862	14.1513	21.838	9.84552	11.2163	28.6115	24.7314	43.4112	34.2693	29.2078	33.1902	71.9316	77.4226	51.3869	14.6713	18.3909	290.564	10.0574	43.0658	23.9507	28.8807	30.4052	20.2061	55.9069	75.5558	29.6577	22.6077	28.8843	14.7523	17.2131	100.732	14.947	40.0192	34.6932	40.743
1552389_at	125.482	70.8048	88.2408	123.075	146.132	57.9144	49.3379	106.713	17.2039	149.476	258.748	110.116	141.082	32.6416	209.892	96.8618	194.731	201.341	187.043	193.287	214.169	121.69	301.179	93.9902	35.0284	74.1543	125.197	108.818	97.0246	112.066	226.779	171.01	257.578	215.023	136.119	90.5798	59.4098	93.1089	113.26	74.4316	286.506	160.129	78.0023	135.564	79.3554	121.637	147.711	85.8966	197.053
1552390_a_at	427.612	251.951	147.934	403.195	407.534	286.229	135.642	229.03	65.1478	374.095	760.317	205.005	614.717	75.2921	693.359	343.148	672.701	546.155	664.069	276.951	405.74	340.034	877.605	289.13	156.345	266.412	322.629	346.932	120.684	268.45	197.253	362.272	982.713	412.888	440.543	267.778	136.296	269.613	583.636	234.886	1156.26	267.465	451.908	408.934	256.723	265.022	758.287	143.306	966.025
1552391_at	46.3185	83.5024	78.2246	35.5371	61.4243	18.3746	13.4146	10.6164	29.5691	72.7774	4.68431	39.0448	33.7266	44.3322	21.7665	7.85405	49.6808	29.8382	16.9237	21.7942	2.41723	5.67269	3.90233	9.97612	20.7303	8.33665	39.0747	5.87871	20.5619	4.30309	132.891	6.79561	12.6183	6.2368	90.3539	23.6793	2.85806	5.35428	6.01639	47.5157	4.76094	12.6773	7.08694	43.2498	68.0088	3.63056	52.3245	48.0788	11.9929
1552393_at	3.5092	1.87571	14.3976	14.0449	16.3132	16.2017	19.2909	16.3777	8.4822	1.61731	35.742	23.7944	0.798834	17.631	5.55255	3.29603	5.88921	5.88728	4.1685	2.04331	1.57031	12.359	9.10387	27.3302	7.95898	39.2611	3.14021	34.4532	16.3544	6.4348	134.884	4.67985	11.1517	40.846	32.6211	17.6023	0.87243	5.26419	32.9392	12.1143	21.369	20.506	24.5998	26.1167	32.2649	19.8441	0.713432	2.13982	24.5217
1552394_a_at	0.84094	21.4708	4.55049	6.24332	1.45579	55.8606	8.2461	4.24269	1.11584	5.28941	10.8667	4.1848	2.12986	16.1338	22.4974	3.98461	0.638337	4.37532	11.6674	12.3967	34.9414	40.8042	4.54623	0.892687	3.11407	3.8703	5.42517	6.31471	21.9358	3.95624	102.639	3.48049	5.07479	16.0396	2.36241	18.9596	22.4284	4.73011	2.41293	35.5039	31.2764	2.12466	2.04437	4.10863	1.28922	31.7085	18.2644	1.0833	31.1926
1552395_at	35.6452	15.2938	7.42028	11.9666	30.4084	30.2286	18.9667	11.4523	28.681	13.4725	27.6139	36.3653	34.5725	26.7064	35.2796	22.9163	21.2853	27.939	28.0372	29.9538	24.1828	21.7327	24.1751	27.3673	29.9015	48.5743	21.4597	33.1246	22.5188	17.8506	97.6827	38.7019	39.3664	32.6956	39.8145	9.22536	21.1403	28.9581	6.09292	11.9355	25.6097	22.7214	26.6568	36.4447	31.7823	17.5514	38.6258	10.4215	16.8566
1552396_at	56.0226	8.4687	18.5214	68.8661	33.161	11.5353	2.70438	6.57643	5.32256	34.1729	39.2806	9.2599	38.8789	41.0793	6.95951	10.3723	8.09523	70.9924	7.02763	20.943	50.2869	17.1328	8.35327	30.431	6.01335	105.288	22.451	6.31798	5.61845	45.3777	469.339	38.5503	13.2007	16.7199	11.2041	6.1397	8.09507	8.08226	7.50383	20.922	7.49353	47.6685	5.79705	62.1614	31.6618	65.2657	29.4469	25.7017	31.7358
1552398_a_at	280.089	24.7556	460.997	118.869	146.27	221.837	206.266	47.3712	169.097	94.9372	257.393	51.2131	374.92	51.8369	267.06	97.2772	262.807	46.2733	248.149	51.4087	84.5521	47.1342	480.119	53.1099	142.933	70.5157	36.7064	8.99442	511.749	57.0005	468.591	103.595	112.609	43.0523	104.802	76.9632	374.604	74.7626	139.048	67.9919	58.9454	31.0575	48.1061	10.0035	280.318	74.6743	181.155	98.4591	298.624
1552399_a_at	134.311	27.2759	58.6632	59.0431	8.89113	63.5503	102.816	32.2651	97.5992	80.6421	140.822	77.9324	88.5869	40.3347	66.7769	68.6482	68.219	48.9775	42.606	5.80569	142.803	55.8203	121.93	104.469	78.0212	6.4009	44.5334	18.3431	114.457	40.5128	255.91	22.5927	118.563	44.1817	95.2734	80.6658	106.226	40.8852	40.2047	60.7407	65.1696	2.90681	62.4827	6.87282	151.407	7.19612	101.406	49.502	34.6497
1552400_a_at	114.778	233.075	91.6846	129.638	121.86	161.978	187.602	155.964	45.1442	147.255	74.767	150.315	68.6831	207.59	63.4558	198.802	105.377	144.019	96.9507	223.167	64.5132	107.856	141.413	152.245	103.799	189.206	170.067	213.562	113.559	54.1991	281.238	127.535	69.3369	207.916	71.7286	121.767	55.5984	118.029	55.4662	179.554	89.1234	107.42	104.653	132.572	56.3967	168.273	81.9677	69.0427	31.2456
1552401_a_at	59.2306	95.1287	58.5543	71.0083	115.456	110.359	80.4105	93.5554	58.9813	58.7727	51.8687	33.9307	62.5063	37.0783	58.902	67.2995	75.2898	101.662	58.3461	97.6933	78.4801	68.393	60.1309	117.12	51.0714	109.476	61.9816	56.8999	36.7839	29.8823	126.569	53.9138	70.9283	51.8792	56.1622	103.514	36.0283	55.979	57.6692	49.6593	55.1522	35.2616	70.1629	108.372	74.1439	38.3234	64.9771	82.5084	87.5573
1552402_at	30.4717	89.7296	7.19506	46.5399	47.4298	10.6186	61.1247	56.1243	36.9579	53.368	6.25183	43.8055	48.1265	83.8991	33.0868	7.42348	19.3264	8.07688	22.2915	77.886	36.4333	58.0117	9.94861	11.6232	14.2632	32.0567	69.2763	85.3251	60.0947	37.2258	223.958	63.4216	46.2774	105.15	76.5089	39.8492	16.6395	6.16796	1.6175	50.4878	46.801	9.92006	51.316	43.8376	10.1942	63.3105	65.921	29.491	8.80742
1552405_at	23.4344	89.2559	40.2949	18.857	23.5313	49.1178	63.4025	26.4194	51.1241	17.5985	5.28036	65.5757	49.4002	11.2741	7.35906	8.68701	34.5146	35.3286	8.67197	23.19	8.32101	59.7844	16.0247	70.0215	58.2091	15.4956	56.7686	4.22729	28.9397	35.8173	419.198	7.90445	28.6106	10.9306	9.82183	13.2643	76.0172	9.43361	59.6524	27.2159	8.31083	16.9586	36.7048	31.9668	11.6766	19.9957	16.7982	15.7176	28.6607
1552408_at	6.78889	15.7475	8.20536	11.8545	30.7142	6.17128	4.4325	13.5704	31.6324	5.18953	31.6343	33.1503	5.9156	4.19464	24.6377	43.9061	20.8566	6.35908	20.7534	30.6102	49.4314	6.14533	19.7083	24.979	38.2032	30.8595	2.54357	38.0376	2.51884	25.9921	369.856	48.4181	17.3565	1.57397	15.1697	26.6507	1.82031	23.4569	23.744	24.0635	50.8098	1.86921	29.5817	33.4016	34.6054	11.6237	47.3058	24.0834	37.9286
1552409_a_at	14.4999	27.9968	10.009	14.1273	10.2813	139.718	14.6592	25.3911	15.8651	14.9513	9.56807	18.6099	14.8673	58.7163	15.4952	25.0168	8.66905	35.5472	10.8474	30.9363	15.9856	25.6396	13.4733	13.3616	11.4901	29.3989	30.7998	27.0302	24.9835	32.1312	400.202	17.2364	25.5866	77.8716	50.3766	22.8085	16.9804	16.4859	8.44795	13.407	25.869	8.61042	16.4344	16.0612	51.645	20.298	19.5319	13.4453	10.6992
1552410_at	101.823	46.2557	53.1251	87.7164	80.8854	268.263	110.99	70.2468	63.4049	53.1253	77.8833	52.1132	82.6094	68.2478	114.542	65.9498	124.009	148.189	86.681	37.055	98.9885	171.445	348.265	25.0174	71.4648	22.7195	73.0004	83.4975	76.5272	80.0369	220.787	71.0168	109.783	34.0364	101.067	95.7523	170.978	171.588	54.9843	57.1322	88.127	19.7699	55.7256	83.7332	95.1405	100.582	51.4689	66.3237	77.6246
1552411_at	105.53	84.4086	15.7613	181.988	89.1343	50.0725	114.472	58.0838	85.6363	15.0328	108.96	134.385	145.521	67.0826	92.01	110.606	116.279	87.2299	112.388	72.4565	148.614	175.394	135.514	55.8421	20.0911	182.995	77.9227	124.506	122.38	61.6401	307.497	20.632	212.048	80.4355	141.127	82.4053	106.147	170.444	115.504	12.2099	83.6223	105.822	131.313	14.6752	53.5168	10.2984	201.669	111.87	23.1996
1552412_a_at	2.16434	9.37774	1.61524	17.5785	6.82527	22.8198	4.38306	14.6103	7.32437	5.12994	11.7627	3.08482	3.39214	2.92581	6.92126	5.66202	2.63599	37.2984	3.95786	4.94027	5.63227	6.26848	4.32983	2.71382	2.12546	51.951	4.79464	6.4826	9.14485	3.24423	300.109	6.83347	8.80524	5.21875	5.04087	3.74663	1.31422	42.6695	2.02248	63.4888	4.05021	4.16127	3.52881	2.74896	3.55725	4.87974	5.64082	16.024	7.05217
1552414_at	42.8071	10.0812	62.1015	19.1014	46.2381	34.6126	127.289	29.7613	15.2881	24.7108	6.73968	82.5838	27.4224	39.8452	2.58363	17.7776	14.1909	36.7804	51.5361	24.9467	32.2006	50.4518	23.7649	55.3113	21.9445	41.4851	13.1509	53.0232	4.28655	80.6827	231.25	45.4042	56.672	64.2223	33.8599	26.9599	22.0939	35.2049	3.26254	19.1579	69.6992	34.4202	9.38599	7.7836	38.6189	23.8352	14.4009	63.3851	11.5875
1552415_a_at	3.72635	19.0845	20.6296	78.5612	7.02068	69.7489	11.6028	44.5018	8.41774	62.9159	6.13556	7.49611	9.61468	38.8582	22.985	22.6126	30.213	33.9017	8.88771	63.758	10.4323	100.211	10.7146	26.1807	9.66392	36.086	12.9045	8.25893	18.3323	9.11487	17.6854	57.1128	110.506	68.8917	64.1048	66.2299	24.7847	27.7005	29.278	53.774	72.6988	75.7369	6.28528	18.557	8.65552	24.448	99.239	56.8646	3.42173
1552417_a_at	198.894	167.177	281.522	83.1612	198.605	208.97	128.196	175.789	221.054	137.844	192	86.2279	193.107	206.653	189.298	181.419	217.274	148.741	252.823	153.721	195.927	228.778	225.111	198.752	197.752	179.23	130.892	119.117	231.81	198.92	521.646	248.998	204.73	208.368	255.392	193.777	170.158	160.191	138.123	205.661	241.529	182.803	185.117	164.994	114.133	133.472	306.035	223.879	238.284
1552418_at	4.12678	4.02988	8.45409	21.8089	3.57608	4.04592	6.07038	16.4218	2.7322	4.86223	6.71586	3.85351	9.30777	9.80925	4.51905	12.2958	7.46807	14.759	5.43193	9.75473	5.19898	20.2499	3.64502	15.9435	5.76104	11.61	10.6745	7.82808	7.23117	4.30468	152.399	3.8265	5.80338	9.79701	5.14811	3.4822	4.04087	9.06485	2.66475	4.58429	3.32138	9.31988	3.64301	11.2118	7.9586	8.8751	4.19584	4.58168	6.40455
1552419_s_at	128.329	128.357	19.6034	107.145	141.9	51.4202	81.3661	146.78	99.8425	140.367	78.667	182.434	83.2841	22.0692	47.7957	167.361	105.075	141.209	113.623	121.534	163.451	71.5011	129.621	202.749	149.222	136.608	99.431	180.68	137.835	208.852	170.536	132.694	129.5	199.962	132.762	44.6604	44.8859	105.162	80.7546	31.461	68.8742	153.196	36.9144	164.171	44.3279	143.551	95.5519	126.192	191.313
1552421_a_at	11.6851	15.6074	4.40874	60.0767	4.76075	6.04178	7.13844	2.61802	6.55272	44.2026	6.54908	7.96346	3.20873	5.68374	35.8852	46.1657	35.9306	6.51927	8.48788	37.4108	9.91541	9.83192	14.0787	12.399	9.82353	28.7866	13.99	13.0178	8.49403	7.90457	89.8111	15.6092	52.4842	8.93144	13.6374	10.631	5.99883	10.9439	2.62057	5.15872	27.8918	15.7886	6.23506	5.42452	50.6587	4.06452	23.7455	8.97791	14.592
1552422_at	83.6647	107.296	113.361	48.9165	112.08	55.8741	189.916	32.2518	55.9934	55.4622	141.89	33.1759	82.6109	92.0466	151.986	26.9167	128.482	52.7791	94.1379	19.108	119.171	22.2446	110.258	81.8568	65.4271	13.1308	86.2785	14.1913	7.40295	26.6185	524.922	12.9215	184.211	45.2154	135.114	51.5936	92.7957	56.7397	185.43	101.916	117.161	47.8996	176.263	80.1068	171.852	49.2613	79.9283	16.2595	209.574
1552423_at	104.91	167.809	89.1303	211.798	95.2489	110.002	110.262	158.773	95.9614	80.7618	60.5563	179.026	183.96	315.38	122.576	82.4351	94.9413	157.413	109.648	123.987	116.542	195.747	147.957	89.6217	76.3267	135.636	99.4691	139.105	204.227	152.702	123.032	171.411	93.9497	195.65	216.391	183.968	165.883	105.617	104.414	128.903	66.2125	77.7947	78.4702	87.7404	121.421	135.477	129.811	124.76	250.409
1552424_at	11.7717	4.50089	9.13361	4.186	27.5349	3.19634	3.27683	5.12885	1.63627	2.78783	2.70868	3.74065	1.51035	8.88096	2.83328	1.70549	4.26002	2.37167	1.30245	2.84546	1.73493	18.1761	2.19738	6.51801	16.7761	3.08371	1.52847	5.08777	0.898711	1.91718	302.206	6.57762	6.70073	3.94708	1.19414	15.7769	2.88343	37.9094	1.88925	12.1515	2.77315	3.02036	1.13495	33.8278	7.28533	2.52197	5.68653	10.0056	25.0051
1552425_a_at	42.0014	160.023	52.4406	116.271	64.0813	73.8632	25.9875	68.95	52.8548	29.5814	48.7686	61.5251	99.7583	25.6298	51.9925	73.7653	44.0361	16.3166	51.3949	52.6917	48.9234	143.749	41.1508	27.5487	64.4052	64.0116	42.1547	48.0828	62.0654	37.7879	314.634	57.2036	71.4443	60.9473	61.5207	42.2702	61.1329	44.3804	70.3528	67.359	27.5145	39.5538	35.5339	76.6356	60.3143	104.318	56.4436	80.0347	35.9971
1552426_a_at	3828.65	2822.7	3050.77	2479.04	2696.21	2724.93	2767.25	2937.94	4160.77	2979.86	4723.69	3432.57	3462.56	3509.53	3079.06	2891.83	3505.06	2632.24	4222.21	2560.53	3527.16	2676.51	2686.93	2609.33	3018.76	2791.3	2289.47	3032.22	3413.39	2695.23	313.989	2865.39	3495.22	3043.49	4352.76	3749.99	4345.31	2826.51	4786.68	2999.57	3738.45	3222.51	3793.77	2606.33	3782.18	2922.35	3606.94	3144.65	2780.86
1552427_at	44.6186	29.2933	95.6448	34.8719	112.888	104.158	132.698	67.1128	19.2788	34.5647	63.3648	46.3064	88.2174	56.6761	104.388	37.9161	110.649	14.5699	84.7856	65.3828	90.7628	99.0947	102.506	30.7412	128.142	45.1764	85.9706	53.822	72.4499	30.1512	185.72	100.369	97.6551	42.1977	48.8797	46.5573	75.466	84.526	91.1576	61.129	185.981	43.8717	148.072	54.693	128.989	43.7914	88.56	50.6458	163.597
1552430_at	134.524	137.131	40.1718	80.3058	31.4394	34.3566	76.112	159.817	23.7699	75.0292	61.8356	100.144	41.2674	108.01	46.6843	101.485	78.2686	78.0436	49.7616	84.2241	69.7334	107.765	77.7104	148.697	57.5737	113.304	59.5108	68.8624	70.1265	79.9059	403.315	98.2175	92.2158	95.7453	95.0413	107.807	58.4704	129.457	38.5412	131.564	90.7688	79.5479	91.7432	46.4641	57.362	69.9891	69.3706	80.8528	49.1892
1552432_at	9.93459	22.7018	40.1763	17.7716	80.6924	36.322	25.3765	6.67931	71.6803	21.7093	9.74085	8.88903	38.1646	15.4093	13.1707	13.0622	4.88585	8.13309	11.1273	12.8159	6.07613	12.3506	6.33105	14.6421	11.3284	15.0523	10.1395	21.8226	15.4685	12.4163	87.2986	10.7536	6.74704	6.62006	11.75	15.6029	4.04934	24.0808	9.38433	12.185	9.01229	14.6731	23.7514	15.2379	9.06397	19.9475	17.6669	13.7752	16.0005
1552436_a_at	8.92462	99.6707	15.4358	6.8719	14.7631	24.1507	10.2955	71.3549	10.3885	15.5071	44.1383	25.0136	29.0673	6.62891	7.73283	65.3562	10.3219	15.4027	8.34181	5.38903	15.6229	78.8901	18.6756	61.6546	8.58708	56.3485	18.3406	10.2739	7.77551	52.2875	54.8329	13.5034	8.50498	150.867	10.2328	65.182	2.55976	38.2743	7.75567	14.778	48.6893	71.0248	9.73587	18.0474	14.1778	16.0251	18.59	10.7664	83.1157
1552438_a_at	35.1987	87.0836	53.5567	60.5162	47.2784	15.9404	7.47297	87.7193	27.4042	73.0902	6.03993	18.7626	45.3904	45.4656	49.5243	60.1622	94.4411	66.5134	35.1491	66.3015	41.9891	45.0171	53.2885	75.4187	49.8991	105.898	75.7607	67.5099	64.9351	68.351	877.946	7.79998	59.9495	46.8637	52.0103	41.2807	41.3444	62.8529	43.2196	87.9326	49.0754	80.0055	38.4268	48.2742	68.811	57.8666	87.3558	41.9926	42.0871
1552439_s_at	16.2514	5.55192	48.7191	4.60075	582.683	346.406	4.03081	1.54708	9.56334	89.0345	47.8394	17.8598	123.299	6.76748	101.222	4.50862	132.758	43.3731	40.5805	1.81755	2.37122	9.04276	54.8598	8.89844	61.6942	2.63359	147.3	11.1015	37.8692	47.9791	163.102	11.6712	4.39161	12.6859	2.81742	450.679	57.3619	17.9473	30.1281	7.11369	196.71	2.74868	94.5399	3.50493	147.494	69.6349	106.488	6.52326	174.374
1552440_at	38.8011	127.122	4.52109	110.355	170.403	152.296	48.2595	97.8676	45.4732	77.7961	22.665	180.708	20.1591	38.5908	29.6715	112.114	61.8549	94.4343	28.2173	107.15	27.6401	42.5411	61.0901	108.51	41.9008	106.671	70.48	128.322	49.3818	120.981	513.314	62.7313	165.368	84.2465	30.3175	61.9852	71.7169	72.0379	76.9843	73.8192	39.2131	57.7267	35.3976	54.4826	43.6865	74.343	109.918	71.5586	61.9475
1552445_a_at	41.5768	11.4346	56.8702	149.678	6.37224	7.56371	41.4905	40.1092	19.9034	9.48404	4.77595	1.77199	51.4379	65.2135	24.9701	7.5027	26.5204	35.4257	41.7807	12.1485	3.96526	7.12045	42.5297	77.017	1.41601	38.6622	3.551	43.0956	6.83074	31.637	219.163	8.40147	29.395	25.3512	15.4721	36.6542	19.273	3.48386	5.73372	7.10474	13.0138	24.2286	45.7879	25.2506	29.2156	32.0147	32.0005	32.5105	41.254
1552448_a_at	10.2253	88.1449	2.06893	43.8028	3.09157	10.971	5.83513	49.5333	3.52758	7.19982	5.5745	80.6539	21.711	82.8699	2.90289	45.8663	4.9609	20.5361	5.54249	38.9433	22.2077	7.02714	15.6881	2.03425	3.11113	2.05307	36.6862	4.08629	6.81756	18.8774	104.658	11.2898	8.12096	17.1336	5.58822	8.4113	1.59753	4.48709	9.73798	52.9085	20.7223	5.89761	3.7831	20.3941	66.0389	4.13803	5.72336	13.9364	3.35463
1552449_a_at	3.96631	6.63507	2.59781	3.73916	23.2359	45.8404	20.9226	9.574	1.20563	4.40759	1.93612	1.95606	3.86865	1.60432	3.56718	7.91141	1.42167	6.15137	32.2527	4.84255	2.54362	5.99858	2.0778	5.17934	2.7999	102.126	3.52876	53.8194	0.984959	8.14857	84.5056	8.05726	2.19989	2.43728	2.49034	45.2256	3.57558	5.13883	1.47199	2.21065	3.9243	2.53568	3.76986	1.66042	27.8244	7.86172	3.62067	2.80815	6.96552
1552450_a_at	9.34096	17.5508	41.7314	26.7131	17.499	6.45737	55.6409	102.135	9.03335	29.7772	28.2354	6.0177	57.3648	13.0258	54.6771	6.03375	33.1193	11.1293	60.0416	46.8745	37.9908	123.821	72.559	37.6598	51.942	11.8301	20.6215	20.6945	9.66782	16.9769	160.557	9.13886	75.784	105.747	45.9752	78.5075	47.0213	62.6459	73.7518	38.3432	11.462	42.7869	55.915	54.9018	2.11955	11.9522	122.578	7.90851	81.1509
1552452_at	1.8117	3.99655	3.88284	5.77776	47.3431	4.90347	2.34022	9.07967	3.53769	4.24361	4.59784	9.70664	2.12199	5.20193	6.80296	8.02669	7.02067	5.20676	9.64499	13.996	10.3483	25.6318	4.74842	13.3032	4.65903	21.8431	7.15102	5.27548	1.40302	10.0446	71.9345	5.44763	2.21407	15.8021	4.71513	2.03346	5.25035	16.1871	13.0077	6.83365	3.15742	7.17988	1.80422	31.2725	9.29897	2.4294	3.14124	6.52842	32.2066
1552453_a_at	3.115	11.151	1.72884	3.54072	4.34107	10.8203	8.61762	7.89956	2.54924	3.04171	2.2561	7.95225	8.09854	3.58118	3.96231	2.67695	5.4949	2.89634	2.22892	9.25186	2.2951	5.53384	2.30072	5.74489	6.03739	3.8164	13.1714	3.54307	1.96028	2.81127	15.6569	4.83764	7.33185	4.31875	1.71974	4.09819	1.51126	2.48583	3.1799	4.75072	4.54952	4.2111	4.85741	4.90302	5.90346	11.3978	3.72673	6.74955	9.57162
1552455_at	1218.68	173.547	1097.91	255.108	196.616	315.94	981.68	355.837	39.3612	511.894	2720.25	570.316	1864.87	474.728	1083.37	213.016	2262.59	515.962	1179.02	521.798	2273.72	347.412	1226.58	365.583	978.937	464.239	499.993	826.475	1301.13	218.971	522.232	726.456	1337.95	542.311	982.339	279.815	936.311	351.65	1670.02	238.476	2943.47	720.854	1617.52	338.542	1594.12	554.874	1832.07	486.427	826.034
1552456_a_at	27.4291	42.5109	4.04558	7.76414	3.83224	6.44751	4.15725	7.85761	6.88133	3.816	3.08024	12.0294	3.33163	43.9939	6.63385	2.98351	3.16905	11.1574	5.09323	11.5166	5.90605	17.7354	4.71619	9.65634	4.77012	42.1627	5.04723	11.8955	5.47204	6.64801	8.80329	5.7317	5.39942	15.8619	8.93146	6.14509	3.72525	36.4733	27.7601	5.39409	8.91175	10.3412	29.0336	3.30541	2.8267	19.8314	39.8983	9.31799	15.4918
1552457_a_at	3.67017	10.5307	2.7326	62.8845	74.1902	15.8488	8.13283	5.60228	16.2855	6.43884	1.65931	5.17368	3.85075	7.71449	6.83378	5.23916	5.67991	5.34781	2.0369	7.94734	1.87765	59.7288	4.81859	6.99526	2.51707	11.7741	46.5734	24.3351	26.1048	22.3532	140.303	78.7578	11.0276	5.97581	2.23681	10.4229	3.19257	70.3598	4.64667	31.8936	3.79874	39.9625	4.60455	35.9276	1.84857	4.64687	37.614	50.7156	2.81707
1552458_at	40.4339	65.0391	21.2137	68.6309	52.6906	7.24857	42.3992	32.4691	38.945	14.8789	4.57484	21.3106	25.8125	28.4148	1.54225	18.3199	34.4712	50.7182	29.4414	41.9811	19.6377	3.13268	49.5541	77.7274	11.7802	59.9946	16.4449	13.714	13.4244	3.16201	10.9149	6.13817	39.4083	3.0796	11.3684	40.521	35.676	45.7569	1.07237	31.8936	45.3765	32.0353	29.5124	49.8236	33.0077	50.7152	0.892739	24.5131	61.9029
1552459_a_at	6.5645	55.9772	1.99478	12.4286	9.95207	14.1926	11.1452	26.7444	12.0443	40.7547	9.15606	66.0429	18.9796	5.66253	8.6874	4.16937	6.2863	37.9091	2.87161	13.8481	5.37149	58.1959	8.90943	54.2256	6.2313	14.7721	34.6281	27.3199	12.094	6.77154	211.972	11.4102	9.35749	13.9044	12.703	40.7733	35.1847	28.6651	14.5425	17.0689	26.1223	35.7933	10.727	44.6888	14.7287	29.4004	40.4957	33.4756	11.9547
1552461_at	11.4165	47.1564	7.45658	12.5865	41.1561	36.9062	20.8727	3.20101	11.4308	9.5196	4.70826	28.6753	38.3295	28.0387	30.9615	12.1349	3.72049	4.50055	8.74838	46.7962	25.2242	26.7158	34.6294	23.2435	6.48764	7.76873	3.72447	11.1631	11.2785	14.6946	106.767	40.1208	4.50481	25.4041	27.4006	8.05245	8.78391	57.0404	11.3346	30.0987	30.2341	25.2303	10.572	9.73483	13.6965	37.4036	18.1914	16.1778	48.6324
1552463_at	22.5222	54.8832	2.13434	57.7085	3.25003	32.4411	32.8301	7.59029	25.7361	17.1219	44.0099	53.8791	39.2147	38.4723	35.9677	17.0907	32.8696	14.6313	12.5141	33.013	84.0123	80.0362	14.2303	32.5784	6.10694	86.5264	28.6214	39.7202	50.518	33.1174	221.032	20.7265	55.782	42.3312	33.1135	47.5698	24.5373	21.1025	22.8104	65.6119	37.215	24.3034	31.3764	29.2088	35.7064	28.4688	61.7463	28.7927	23.8523
1552466_x_at	25.5759	1.6692	5.72649	5.30647	3.66701	2.86035	2.50766	11.3915	2.14232	3.97136	3.43401	24.3571	1.25114	3.5247	16.3467	17.2708	1.97475	3.82899	1.44397	1.54722	5.49786	22.2538	11.6573	59.5872	8.55558	4.41065	37.7391	52.4785	1.59156	2.19503	12.8348	4.8353	0.606418	3.66803	13.1716	5.67021	12.9254	28.692	9.1837	14.8129	2.71371	5.80775	33.4414	11.76	11.5267	2.33441	3.98958	4.02908	29.463
1552467_at	38.1512	143.996	63.1668	27.5764	18.5341	48.8597	16.9207	99.0531	11.2798	38.5798	11.5467	34.311	69.3678	31.6559	98.5927	15.6092	86.3683	20.2655	22.1984	53.8336	65.6599	67.7168	123.13	20.0127	84.9694	50.6972	35.2761	22.6443	72.3573	83.915	116.61	99.0091	35.0068	61.7582	95.0447	83.822	9.79819	60.9883	7.43167	19.8485	58.2071	21.6887	25.8276	35.2938	27	20.2765	79.3761	12.707	31.4022
1552468_a_at	48.6624	20.5102	26.1979	75.6129	105.92	26.273	127.557	10.4271	30.4131	15.7058	75.8468	29.7479	26.908	30.9423	8.71041	17.4277	48.6935	49.7241	48.8476	9.23162	19.1284	31.9478	20.1366	25.9579	24.1657	97.0285	6.18355	9.349	66.4143	114.303	188.822	20.3695	11.3233	136.618	44.4073	93.7003	19.5802	54.1852	59.9954	27.4479	22.9337	113.88	5.02163	31.0566	10.5275	13.4137	116.531	18.6808	12.2108
1552470_a_at	28.0575	31.0013	73.1282	90.6641	24.5083	105.074	87.7563	94.4419	221.366	102.365	77.5162	71.909	122.83	62.1281	88.5322	75.4726	38.5505	19.7057	63.4202	41.0652	108.863	65.9148	62.8458	46.3824	128.597	20.0416	48.8401	111.278	16.7796	42.4704	330.342	72.8186	40.0713	59.9724	82.3182	75.6343	42.3714	68.1149	42.7034	62.4194	3.60746	44.4977	63.1595	104.352	75.2349	75.6787	70.1169	58.4456	96.9011
1552472_a_at	345.002	78.5412	201.555	160.162	166.992	205.373	167.615	204.998	225.143	151.491	244.418	210.669	234.522	160.481	304.559	146.787	253.607	189.044	289.832	132.87	210.168	290.286	326.636	159.363	169.906	141.497	162.539	158.73	334.227	197.12	199.131	163.117	319.984	192.624	278.645	221.66	286.603	157.827	238.356	192.474	239.466	139.599	167.904	148.198	253.185	112.867	277.786	225.431	271.549
1552473_at	384.155	714.596	507.869	915.404	256.563	455.618	723.859	618.511	281.259	748.74	440.067	502.03	287.901	345.914	392.323	491.335	269.736	606.795	234.832	502.622	487.632	623.229	338.718	416.466	376.379	683.444	815.044	547.883	516.209	589.912	72.4802	463.532	348.136	230.528	406.644	398.253	244.016	383.256	299.53	423.824	329.779	595.742	323.384	520.089	336.48	530.6	258.219	471.06	61.384
1552474_a_at	634.908	893.519	460.817	1374.83	294.194	232.894	1096.91	708.059	328.619	1042.04	725.697	883.047	638.989	629.159	565.927	860.972	627.719	1084.51	626.012	757.234	629.708	1410.66	703.251	1025.02	397.112	709.616	588.291	608.875	603.363	763.364	506.787	687.313	779.573	1041.46	485.469	576.038	542.749	808.299	461.085	576.799	700.939	618.524	543.956	815.061	417.817	534.942	543.447	815.208	621.362
1552476_s_at	79.6381	184.854	181.749	45.6548	243.759	153.511	168.063	107.787	235.404	107.092	31.9478	223.646	152.192	145.264	182.438	186.254	71.817	29.036	83.1302	25.1271	138.919	228.597	124.346	186.298	81.7625	33.7692	149.657	84.6789	125.155	89.9451	37.408	102.987	120.307	159.211	24.3224	116.576	18.8451	103.358	68.7521	22.33	26.5975	70.0193	70.3847	77.2574	97.7875	84.6305	99.9027	169.461	223.519
1552477_a_at	178.732	495.753	140.391	354.847	327.177	204.192	47.1626	334.175	455.87	276.097	128.96	445.717	142.256	342.967	183.079	359.321	134.907	220.504	103.77	314.47	188.069	430.283	81.2472	287.844	104.428	240.224	186.939	292.398	127.291	276.765	566.265	300.413	281.323	292.723	183.813	344.322	116.387	274.937	85.4916	189.326	145.657	371.807	21.2287	287.764	140.109	241.234	217.821	330.051	165.909
1552478_a_at	62.7465	117.578	69.3846	129.752	66.3232	44.6365	33.8561	104.522	53.4064	54.255	10.1659	39.0586	55.0044	127.167	8.25425	71.386	12.5392	44.9924	11.6702	77.5365	89.4321	143.14	34.5787	95.9857	15.805	49.3894	58.6585	22.918	31.8686	107.826	169.574	50.8903	87.6997	85.4375	64.5738	101.944	38.0904	20.145	39.7196	65.8607	25.1033	31.5563	5.67985	45.3753	7.22984	50.3399	71.8309	108.12	21.3386
1552480_s_at	49.63	31.5098	115.93	5.99693	94.5799	90.288	3.66281	32.9848	22.3293	3.34416	28.1939	21.8833	49.4856	11.591	38.7539	9.28335	18.2814	0.721752	44.8124	39.3863	27.0345	38.2505	165.608	45.2887	16.9161	2.36847	32.6309	32.5027	29.327	2.61658	407.861	29.8111	22.9495	37.2963	63.2524	46.0192	45.8939	32.0007	50.2494	14.0626	38.2261	5.21128	36.5798	32.5913	47.4692	29.0515	14.5855	36.7087	54.6685
1552481_s_at	108.464	186.781	123.616	133.494	94.1283	46.3216	110.897	72.5967	87.9871	60.3702	67.8708	62.3866	84.1032	124.043	48.4749	29.1019	73.8731	85.864	94.6934	76.6354	35.0198	126.489	42.0138	107.744	121.662	14.34	33.7999	53.6645	81.3448	71.0668	126.97	86.3113	146.519	110.352	71.7892	69.5246	84.3076	78.0096	46.1516	50.2167	96.9552	113.007	45.3096	48.562	98.5433	39.5593	90.7745	58.6713	85.316
1552482_at	123.979	201.325	167.71	179.874	345.731	249.288	140.782	118.651	115.481	110.217	98.5945	180.775	74.424	215.768	145.891	106.56	111.302	99.0452	70.9054	40.4553	133.78	83.2181	70.9898	223.265	120.68	193.091	132.941	226.506	166.624	192.576	335.927	175.552	203.517	158.644	108.958	151.478	223.89	145.578	193.007	128.403	157.543	81.8357	146.992	81.2257	322.403	189.775	321.562	140.124	115.533
1552484_at	22.8436	75.0827	20.6314	63.6171	40.5124	15.7917	32.1612	29.1102	12.0779	148.634	101.35	36.6992	58.5818	80.2897	86.6305	14.3619	103.212	23.7179	25.4733	97.3167	37.8626	190.297	66.0265	35.6751	73.3157	31.8362	16.2382	17.7588	103.062	152.815	51.6856	56.8978	105.381	181.196	114.001	20.4474	27.076	49.7236	85.3093	32.1302	53.6475	75.768	41.7278	28.7573	23.544	31.5578	43.5942	153.325	13.0059
1552485_at	243.504	349.362	331.656	448.279	301.743	333.855	179.319	218.297	562.583	442.394	211.564	312.889	298.159	372.101	335.59	346.14	340.633	313.995	290.46	325.796	211.914	401.683	497.099	372.263	290.822	295.354	388.12	326.9	645.172	548.713	718.397	328.969	334.749	448.984	327.594	324.148	361.072	454.557	174.495	426.407	241.761	527.934	322.594	377.364	271.919	482.788	318.786	446.595	332.401
1552486_s_at	428.743	317.938	353.283	293.706	289.514	421.426	566.009	479.627	425.888	436.677	255.595	294.38	404.074	337.034	383.635	457.975	350.916	413.732	387.863	391.381	306.136	298.02	637.159	599.189	389.832	247.745	340.953	263.467	616.272	578.206	1171.99	451.388	384.009	451.175	503.257	434.551	430.048	444.866	288.293	397.856	280.493	503.413	347.758	582.755	334.718	385.245	421.441	481.029	319.75
1552487_a_at	24.5511	67.7052	25.7405	1.28856	47.6344	30.0122	31.9009	0.58555	1.58673	11.7941	16.1467	14.9049	2.69058	18.426	21.0266	4.76556	4.28528	2.68311	4.43922	2.50291	2.10148	18.955	3.63356	2.45583	1.14477	7.04626	24.3694	1.29546	22.3769	2.25174	26.677	37.2297	1.05475	15.1563	18.1301	6.61627	2.04425	13.5289	29.877	2.11397	25.6439	21.3427	5.20722	11.6963	10.7228	2.16438	25.8437	16.9394	2.30672
1552489_s_at	18.9516	1.36977	1.54365	7.94288	13.4087	12.7347	10.2922	90.3286	12.1148	25.4811	1.81547	19.6527	6.94327	3.58312	40.3751	2.88777	25.4021	17.5059	16.5516	11.1004	1.70056	22.1237	11.1062	44.3491	16.4614	41.5624	11.2389	56.0506	2.01973	1.15346	156.464	4.30002	27.926	21.0415	15.3828	12.3603	8.52603	2.78244	4.46798	4.1843	29.1475	19.5555	15.7166	21.2661	21.966	7.13575	23.3292	4.86405	18.0249
1552490_at	87.3252	103.939	99.0276	120.952	115.802	113.659	53.9009	142.631	70.8914	86.1136	95.0232	98.949	84.6212	41.3104	52.8579	103.496	55.3482	121.118	76.7178	73.9073	37.4835	86.4665	96.3495	143.988	68.3306	122.307	70.6556	65.7468	51.7279	70.0237	92.1933	125.885	65.9395	137.082	125.13	68.4984	34.9663	111.755	75.7316	74.3297	77.3952	135.284	100.688	121.822	101.064	89.9398	89.5751	82.4535	98.7276
1552491_at	84.7753	11.5105	3.5484	15.3901	7.03722	39.686	4.84245	49.8802	44.4576	7.74836	5.88082	11.4873	17.9592	10.3342	8.45064	8.72302	31.8537	5.62805	23.8988	17.3498	35.2184	44.1552	18.1919	20.9435	27.5206	30.2001	35.2848	60.0273	65.3318	13.3134	10.8256	11.4839	16.1773	16.2951	21.2598	20.6767	9.56076	20.4001	10.3217	9.71694	9.21223	56.6743	3.03884	7.51461	13.4037	8.68649	60.0922	11.0888	8.15682
1552493_s_at	4.49525	23.6179	6.94049	16.7065	8.62833	6.71311	10.6024	13.708	43.016	5.80739	9.14372	9.40688	7.10693	14.3519	5.38864	11.0938	4.72055	6.38734	8.02555	6.52283	8.33474	10.0036	17.0868	15.0545	8.2037	7.34514	14.7565	17.5845	7.12852	10.4292	1061.11	18.1433	8.47472	11.4555	7.25457	6.66522	5.54496	19.5302	34.8937	6.59277	11.4987	3.91593	5.99901	15.3595	40.8023	24.4402	9.7945	6.10331	6.79436
1552494_at	2.72621	29.8873	23.9679	101.3	55.6659	19.8687	69.464	24.9236	41.2762	29.5814	69.698	11.9088	21.5124	65.8636	6.32011	33.1669	16.3717	12.9447	54.6849	16.1408	4.93981	17.0278	6.92488	50.0589	25.3148	27.2772	20.9279	28.4577	32.834	56.8342	19.2826	25.5048	75.091	29.9922	13.8112	17.9668	65.8357	14.614	7.35725	22.3438	62.6402	6.89259	38.9002	21.2884	10.069	9.09723	10.6844	25.7752	8.31742
1552496_a_at	105.366	163.111	149.311	120.944	30.1451	116.036	215.65	306.852	309.304	237.889	78.1481	233.118	48.8351	207.433	138.321	215.102	200.182	212.975	118.37	214.727	72.8759	303.923	114.13	180.617	223.424	122.541	149.414	199.621	140.721	197.971	160.244	142.073	117.478	251.393	114.26	213.613	62.9086	203.572	79.9373	211.253	106.796	153.073	4.09279	321.096	118.235	235.168	82.0761	201.804	87.8055
1552497_a_at	144.931	162.797	288.983	139.478	151.317	347.715	227.274	233.414	103.737	83.0928	136.207	215.024	289.077	159.433	260.7	140.775	151.279	105.494	188.369	91.3787	133.136	300.511	535.1	35.2304	96.1491	131.202	244.441	182.937	429.033	218.689	317.613	157.256	89.4905	230.552	153.437	77.2545	72.2159	98.706	54.4735	125.616	110.995	117.388	143.209	78.8012	105.959	167.653	177.745	174.87	118.393
1552498_at	8.67481	122.304	13.1587	213.61	107.278	64.7515	132.752	97.607	46.7465	115.222	28.9728	126.264	111.346	123.179	47.8408	105.724	49.3754	84.8361	44.431	101.535	30.2684	162.261	59.5417	153.566	91.915	73.0954	102.172	101.831	58.2323	94.53	304.784	134.972	79.3618	140.194	74.5542	26.2837	4.92363	97.6972	60.0393	81.8667	37.7561	74.1411	47.3549	93.4373	61.1456	73.9738	45.0404	47.8048	80.2069
1552499_a_at	17.77	42.9283	14.0968	141.713	104.355	17.8448	87.0046	57.7197	35.5761	36.608	70.2545	79.164	43.228	118.567	60.7829	107.244	52.5756	100.456	46.5009	141.215	56.6455	50.0948	55.4504	37.4139	42.5434	107.49	84.1632	93.0527	15.8542	34.1232	223.578	83.7708	59.0172	50.2385	80.1678	39.9735	38.8496	50.0896	46.9881	45.8305	64.3985	79.407	60.3624	29.8576	59.7935	51.6819	83.4398	66.2807	70.1494
1552501_a_at	67.4585	272.329	93.1521	145.367	130.483	62.6693	46.5849	258.775	32.2349	100.118	34.6125	51.1574	130.787	270.81	73.9909	43.6622	16.3278	18.9694	62.4582	96.0229	47.8414	24.6761	140.042	8.39108	61.6979	10.8939	32.5433	90.0571	41.8374	7.33255	249.06	62.7352	16.9197	23.3361	11.462	20.8994	51.9272	79.2564	106.187	50.7546	42.374	9.10724	27.8688	16.0859	93.235	14.8094	55.371	71.8779	56.8742
1552502_s_at	20.6678	70.1448	66.3708	109.916	96.1035	53.2259	161.562	53.7548	43.1086	17.4338	49.4617	23.3327	13.7873	70.0689	42.5791	48.5652	62.3701	38.9817	49.2256	23.2894	15.5375	109.615	80.8118	20.5887	50.3398	10.7218	73.7584	88.0979	71.0538	4.49051	563.753	35.3971	62.1364	28.7554	61.3218	45.12	31.5908	58.4319	104.3	43.3109	65.9405	21.9178	68.5817	33.6309	116.966	29.4299	96.1502	56.852	43.5599
1552503_at	70.928	19.1237	15.9932	122.032	8.91707	7.14101	64.1406	66.3185	35.7729	20.5336	22.1321	15.2721	17.7457	15.501	36.3395	149.035	22.2537	71.8679	14.4346	24.2512	104.378	162.811	79.4159	147.605	84.1261	130.835	100.785	57.2082	57.3394	12.6736	255.206	167.433	12.3177	208.221	104.199	5.8496	9.15259	79.0555	10.5323	16.4085	52.5252	94.3993	91.7529	60.1195	42.2429	95.4402	28.2262	67.2718	32.2583
1552504_a_at	129.571	277.5	232.96	279.994	133.799	154.429	137.402	403.95	106.325	197.356	85.2393	209.378	101.886	210.644	171.04	301.723	92.4139	530.704	171.71	375.963	66.5887	283.31	264.897	293.187	188.375	292.861	330.73	389.774	167.724	307.264	171.34	273.901	85.3007	481.387	138.528	335.569	148.298	296.898	114.066	347.345	88.5403	392.358	139.678	396.128	86.9232	470.178	72.0784	217.281	121.04
1552506_at	70.7249	61.3434	70.5683	97.493	44.384	94.1291	11.3864	8.9782	9.09518	59.1478	6.64129	48.0409	7.91429	51.0885	6.80867	155.056	9.64476	12.3151	7.97341	13.979	27.3368	73.897	70.74	30.611	29.8634	94.9164	10.8487	122.548	9.18433	24.03	147.451	75.3976	58.0184	8.60983	37.9611	23.0306	61.9773	13.5557	29.6507	51.4827	9.87731	52.4146	32.1624	26.3768	13.7309	27.8266	16.266	48.7042	58.5094
1552507_at	245.111	20.8444	167.13	27.1135	190.626	170.975	88.4747	106.127	157.79	21.7281	309.458	24.5345	109.458	79.9573	133.74	62.696	160.439	82.8969	192.313	11.6231	221.963	23.0577	107.293	22.1601	93.7726	73.1835	108.118	10.4609	179.169	17.9484	590.725	4.85264	244.399	21.1503	265.127	15.3361	224.986	20.2125	121.409	7.17282	161.349	17.588	154.411	69.27	256.694	10.6313	300.587	13.224	195.365
1552508_at	241.452	56.9925	131.996	41.0313	117.127	96.7334	31.2692	16.7377	114.632	22.4832	335.3	57.9991	169.831	140.358	105.254	85.8313	237.96	122.032	149.014	10.4255	109.356	26.8016	154.126	29.9089	130.939	36.8118	46.3464	4.91918	73.6792	74.7617	276.647	6.19177	282.433	8.88801	246.174	29.9896	219.14	60.8136	136.256	32.8337	164.866	10.8897	233.524	11.9435	229.316	39.9609	329.807	32.1615	215.257
1552509_a_at	1168.73	217.799	7.266	261.551	67.0992	68.7413	45.7634	272.267	79.0486	150.396	72.8739	124.639	55.3017	206.976	91.6584	201.489	215.169	117.634	136.314	172.993	107.763	106.067	98.6601	226.186	38.9999	199.748	117.062	188.979	61.3672	135.666	179.879	190.039	207.093	244.755	91.025	50.2229	151.567	171.476	141.855	331.473	92.2563	246.655	178.068	140.527	213.502	135.68	120.574	143.4	110.689
1552510_at	279.655	745.601	272.803	1184.96	362.56	314.916	429.292	1020.68	423.834	2151.16	462.869	1382.49	341.77	1028.57	344.711	1592.25	226.362	1534.24	289.58	1487.85	398.589	2497.53	608.891	2448.95	582.811	913.636	920.32	1060	472.827	1221.47	408.432	860.528	608.885	2154.72	630.764	472.729	440.493	1039.54	355.726	1683.07	190.292	1487.31	161.191	1651.4	403.461	1665.63	686.318	1515.99	325.458
1552511_a_at	76.5409	2.3958	24.4781	8.68101	8.95647	12.4459	39.7937	6.74886	36.635	41.5073	111.437	2.56732	54.4833	6.09242	54.7052	30.7296	99.7227	17.36	73.0782	3.58343	77.8521	27.0157	58.7813	1.49669	68.3331	8.53564	3.25519	49.8532	21.1292	3.54457	219.061	3.04322	67.2844	2.13073	51.496	3.60656	75.5583	7.60873	91.2157	15.1198	100.854	18.3479	30.1262	54.5574	32.2811	5.90336	139.107	2.75202	8.26636
1552514_at	46.1886	140.589	49.183	46.6761	45.03	83.4648	118.065	138.46	158.037	15.8357	65.1854	85.7289	4.93657	51.9179	65.6941	70.8014	39.9819	6.57579	45.1183	136.919	41.8177	91.609	52.0129	74.7358	117.196	12.5345	91.1931	56.5459	31.0842	41.9227	445.215	13.6423	17.1576	52.0537	62.1309	96.3565	48.0375	99.0225	23.9894	75.266	41.7546	93.7436	214.093	78.5714	5.75734	59.8078	64.6843	78.08	74.9682
1552515_at	37.7112	2.84369	3.91425	35.9844	56.6917	14.9977	52.4584	38.2835	29.1757	9.77097	14.4929	29.429	35.9766	52.1001	54.3957	2.86398	23.9985	16.2862	24.5961	48.0333	11.7885	66.7419	3.25717	46.0852	39.7724	58.297	19.5375	46.4871	18.7528	60.2113	94.5737	31.3729	23.3722	42.755	29.6806	42.874	28.432	35.9868	34.6156	31.3227	64.393	23.0276	45.3881	9.57282	32.9686	38.035	72.1351	53.9603	39.2745
1552516_a_at	183.51	341.216	161.87	275.24	200.819	192.522	141.625	260.031	186.915	277.363	125.878	219.02	153.558	273.169	212.009	203.248	178.955	213.421	131.712	151.594	141.689	260.358	282.59	225.874	207.949	224.696	201.508	94.0899	161.469	222.749	572.59	264.699	192.19	304.733	151.91	210.409	139.845	209.908	123.138	119.921	63.806	106.614	139.6	125.823	204.716	212.826	183.812	316.968	227.473
1552518_s_at	17.3173	109.959	88.5148	73.8427	36.9255	7.42015	106.045	8.73598	58.6468	82.9593	10.9097	7.29686	6.23661	72.0592	61.4363	6.3274	20.5908	5.83981	13.4935	20.8231	108.986	2.12258	93.6203	38.8369	44.6645	75.8341	23.3546	6.8332	20.2717	50.8447	461.877	81.4744	88.1322	10.514	44.6744	47.9249	14.6717	45.0728	90.7844	74.5324	60.2045	10.5101	29.5862	58.138	45.6358	3.66412	67.8795	5.899	7.65199
1552519_at	45.1896	137.247	54.1604	171.768	95.0369	181.216	58.5178	142.378	807.422	177.115	35.6034	106.102	70.6026	99.1581	73.4346	169.263	25.923	145.726	92.2185	189.752	74.2917	232.556	83.8676	191.098	58.693	305.61	154.037	173.285	79.1715	146.969	582.383	153.824	41.2266	133.862	41.6599	118.505	52.6863	210.235	46.1065	149.761	116.62	155.846	52.2059	173.236	48.0032	136.865	106.754	211.632	50.156
1552520_at	41.7475	21.1611	6.53198	120.514	52.488	17.5627	53.6692	66.46	45.1905	31.8681	39.713	51.2196	30.4971	48.552	53.0539	33.5768	34.1156	57.9184	59.7032	51.6843	39.2294	76.7876	37.6764	115.507	41.5024	9.40115	77.5774	4.80779	24.176	17.4115	38.7301	67.3497	19.3903	26.515	55.8301	30.5019	23.9686	51.7654	2.2087	44.6807	44.4551	13.3218	14.7774	57.2822	32.2071	18.323	16.605	73.1302	60.8433
1552521_a_at	2.88436	4.98095	5.87834	3.1067	47.1728	2.96311	2.86977	20.4392	3.1547	24.2402	43.2756	55.3984	2.60226	3.11463	6.64714	22.2455	27.9601	18.7804	9.28407	28.1358	8.16161	33.7954	10.9792	38.4519	2.73425	24.1443	8.31137	12.5782	17.9643	28.4941	110.776	19.5528	11.0836	4.56007	17.0816	34.1258	4.52227	1.00659	9.11461	2.66559	22.9343	20.0882	0.890955	3.45178	13.7144	20.0345	4.39268	15.3681	2.2392
1552522_at	40.9405	41.1543	9.94698	94.3849	11.4255	19.3491	38.069	59.7758	31.2797	6.41622	23.1474	12.5016	28.2266	40.8104	39.7012	64.1591	29.5071	38.2481	45.4539	37.4806	24.9001	47.9029	56.6462	30.557	23.5404	62.2186	7.37434	58.0578	43.288	85.5785	37.858	9.32683	43.0033	28.5073	16.3868	34.4316	42.1751	41.4643	34.7435	73.3638	42.7129	50.2935	58.2208	12.0106	35.065	63.1938	31.1742	38.3025	17.0323
1552523_a_at	57.4437	19.9417	81.4505	11.9832	71.2498	40.1579	74.0496	107.616	12.0573	37.7065	39.7996	8.43709	49.0637	51.864	51.5149	46.0233	83.9493	61.3636	29.9027	40.6168	73.1034	48.4618	65.6472	50.0475	15.6906	21.8108	8.5406	29.9702	66.7112	51.1379	402.122	30.5687	27.6476	30.7986	54.2109	51.3711	63.2079	64.2339	53.9231	59.1118	34.3582	68.5712	63.2826	43.7433	27.0639	36.5603	23.717	40.5395	53.6845
1552524_at	9.61957	25.2546	10.0729	35.4594	22.1445	12.3733	47.0682	18.9225	11.5918	22.1655	20.4444	10.1548	22.7562	12.1977	10.4718	14.1144	12.9647	22.7012	9.22248	22.2513	16.8032	31.1016	11.0985	22.6589	8.60079	17.3443	14.9574	9.85148	18.1035	17.5038	22.1874	13.2327	19.2009	15.1371	15.6468	10.4464	8.08224	10.4323	11.5055	10.2999	13.9493	12.0185	22.5482	6.89702	6.77437	13.5162	32.9261	9.2205	16.1662
1552526_at	3.41215	4.30734	7.00768	5.71523	2.25776	2.81073	3.01107	5.64721	37.1723	4.67263	13.0093	6.83325	3.32415	8.25305	45.7893	4.20785	2.9691	11.7789	2.09184	4.82142	3.57026	4.95877	3.39404	5.16099	4.08417	19.5056	5.38359	9.71842	3.53881	2.6486	178.021	6.85947	12.4486	66.0525	4.61331	5.10694	4.42338	3.74124	10.0034	3.94867	4.84969	6.98834	4.24761	25.2804	6.69259	38.6145	15.0241	2.20797	7.42941
1552528_at	66.0278	38.9063	16.0248	24.9308	96.028	18.6418	18.8679	45.0773	12.8956	11.1321	47.5742	18.9144	7.61783	33.3945	13.1098	12.1218	13.2696	10.0213	21.5856	47.4534	24.6008	118.79	38.5216	16.5613	11.7863	83.3843	22.901	81.3818	13.2393	18.6794	189.35	25.2383	18.7214	98.2138	15.6106	20.3739	12.5634	19.3104	17.8394	13.6482	8.03261	12.5725	5.82785	68.829	27.0529	33.4155	11.3294	38.5733	33.2564
1552531_a_at	77.2821	18.4662	116.788	7.59442	11.2632	45.8167	309.639	92.1586	13.5858	32.1614	82.3526	37.0752	117.667	105.15	148.042	65.1564	138.709	125.051	67.4013	70.1718	363.962	132.012	123.344	95.3486	49.75	68.0275	4.12702	71.6154	118.251	71.1898	435.549	80.7066	84.6284	44.7694	98.1327	56.2564	35.4353	22.0033	30.3705	74.0505	526.733	44.8993	161.944	116.824	10.3564	45.9586	244.512	74.6522	127.446
1552532_a_at	34.8451	529.706	9.58671	596.15	7.47865	194.268	19.5932	270.131	2977.04	398.987	6.23485	372.735	22.1301	647.084	4.74719	734.127	7.51611	153.83	3.6127	827.114	5.95403	369.848	4.19895	199.025	128.33	702.747	239.167	517.414	29.076	402.291	313.843	554.289	11.888	468.06	7.81358	204.829	5.21073	419.183	1.95865	755.063	6.40264	833.163	15.8585	183.95	4.49332	309.39	4.73725	491.62	7.04634
1552535_at	13.2909	685.605	35.86	268.417	127.85	154.774	56.9265	628.17	8.09288	208.748	25.0071	619.232	10.8776	994.263	17.1771	245.563	9.42765	197.04	34.0841	321.341	8.96623	480.251	28.1798	475.192	45.5523	206.518	116.141	345.729	51.6522	95.4598	307.092	376.119	7.59061	208.255	11.415	108.085	9.96862	263.012	7.78202	245.621	6.5834	93.3795	6.4699	138.046	21.8988	9.47499	8.17028	210.237	86.0671
1552536_at	169.448	304.7	221.454	201.677	305.739	261.967	158.411	102.208	131.692	162.003	209.639	154.593	164.182	86.5971	139.589	86.3523	140.566	174.191	61.0268	85.5954	131.94	182.425	264.15	219.15	183.896	328.649	327.403	219.417	245.554	143.44	311.331	143.43	184.147	244.941	179.578	98.7404	161.559	124.302	166.586	124.581	184.268	35.8225	119.24	70.3089	228.007	258.297	184.096	222.429	223.359
1552538_a_at	7.12521	18.373	8.96114	19.4271	7.68044	8.81485	76.0993	54.9719	2.56695	4.84693	7.3285	6.01183	5.2714	6.68145	7.15783	19.0997	7.73323	7.67355	3.36674	34.9447	14.1421	9.21033	7.45834	43.8387	37.9265	4.47522	26.0133	13.634	4.6084	6.16253	301.032	25.7405	4.15833	10.9658	3.17495	8.79858	7.42678	10.8903	2.26715	40.5043	5.81747	51.3709	37.2614	4.02616	5.86707	6.06124	18.3305	6.44088	4.22392
1552540_s_at	91.2064	94.9145	44.6323	150.335	197.397	92.3319	146.003	185.691	65.6361	84.6235	50.8273	17.5408	49.784	170.748	53.5612	159.975	62.1883	124.765	32.6204	120.972	112.912	80.3282	109.198	149.412	4.11703	146.541	168.764	127.535	80.1433	110.701	123.095	103.481	95.3386	33.0205	119.478	146.529	81.874	210.815	111.899	156.855	59.8287	56.4203	47.0037	57.451	82.8663	123.828	42.9956	129.183	137.801
1552541_at	202.343	237.1	135.16	94.4756	192.953	41.6229	91.5906	87.004	139.751	175.821	234.258	165.43	213.155	115.849	97.9244	61.3021	172.075	46.7756	140.263	199.389	100.015	244.825	155.098	193.139	199.608	336.639	200.54	278.512	214.487	113.052	829.178	163.708	217.769	251.553	127.728	167.062	81.7921	98.5246	254.569	139.669	164.686	61.1086	173.013	174.54	113.299	214.646	249.435	120.61	165.908
1552542_s_at	61.0193	57.036	103.493	106.408	89.8089	211.618	117.667	66.5727	28.8826	51.2551	102.79	31.1528	107.373	113.933	106.88	35.3451	102.531	85.5053	108.391	70.1468	68.1087	104.505	251.835	104.719	96.3452	4.42479	101.619	72.3141	280.973	109.67	417.274	80.8279	68.2347	88.2527	237.727	70.2892	85.7828	70.8864	7.97646	42.5721	111.739	76.8745	100.722	53.2689	56.2187	35.9344	135.933	32.0147	69.1187
1552543_a_at	14.9319	96.7661	53.2058	65.9724	18.8589	69.7753	79.0914	101.974	60.1727	96.6656	36.2542	70.3051	66.9907	73.052	82.5227	104.457	59.2077	110.318	67.9136	82.154	132.75	162.42	82.7666	127.33	12.9452	125.96	110.611	97.5871	57.7858	87.938	298.412	62.1266	60.4535	146.55	74.6134	46.4424	73.4319	107.019	77.7116	48.6313	117.835	97.547	59.182	93.7382	158.868	116.155	80.4258	122.386	141.882
1552544_at	28.581	54.3022	72.6277	102.647	61.7047	53.3363	52.0049	109.882	35.7482	28.214	38.7373	67.6973	107.795	45.9119	5.04619	66.9535	98.6061	69.601	43.7575	48.9511	43.5951	7.41543	21.0093	84.5099	80.6422	132.604	60.7898	53.2595	56.6926	69.4202	74.0301	112.4	83.7172	77.2223	64.0332	39.5153	47.2871	57.7055	9.33023	85.8075	85.6405	70.8001	76.9095	71.3205	42.3876	83.8538	62.7945	46.9426	107.83
1552546_a_at	32.4498	146.154	69.243	56.2986	90.238	70.5539	48.1288	114.519	677.765	113.99	24.2306	159.617	85.8629	112.617	191.182	49.3157	65.8419	83.3727	61.8356	99.1912	46.6811	122.816	62.8641	124.247	102.505	74.7233	97.7449	114.343	61.1576	119.234	126.114	125.738	61.4156	31.513	76.2963	213.085	55.9069	119.981	32.1172	81.1225	73.4951	58.0705	55.2449	73.2512	37.9796	109.517	84.6496	106.471	96.044
1552548_at	54.5043	231.672	7.71544	97.5419	46.4393	72.2661	7.71344	274.871	273.047	149.841	37.5081	200.56	78.8619	160.633	35.6009	112.141	64.5506	125.246	70.1331	161.205	11.7018	108.496	44.9145	160.477	7.31752	189.421	147.785	92.9992	38.5771	61.5451	126.444	176.669	56.0217	43.6646	121.69	116.004	52.3716	158.958	60.9493	133.957	24.7002	119.009	32.1952	128.749	35.7091	46.9791	54.1117	127.87	54.87
1552549_a_at	83.0422	440.667	73.8451	409.048	38.0491	111.51	21.1669	361.657	543.296	321.149	17.4853	351.169	14.657	363.738	42.219	271.31	11.9572	160.948	8.14225	476.364	27.5699	348.126	17.905	270.05	22.9773	241.723	231.118	291.468	43.8805	145.534	332.546	273.449	46.6651	152.31	88.1188	227.98	22.2832	320.87	58.2442	269	12.5908	218.232	26.6125	245.928	50.0868	139.138	17.4483	233.814	32.7589
1552552_s_at	29.4639	25.1613	4.97618	2.89298	8.33365	106.82	42.461	36.011	44.614	35.7789	42.5947	33.817	23.2029	10.8585	25.6512	30.6691	34.3817	57.7931	33.5421	21.6088	32.4951	55.4075	29.3628	2.65511	31.5907	67.219	26.629	36.6408	17.6166	47.3376	82.9724	13.9434	40.3025	28.6957	35.6418	3.73406	29.1514	26.9799	36.5088	50.3514	26.0746	22.7043	27.8325	30.4192	54.5328	44.0314	15.4215	4.67164	51.0852
1552553_a_at	164.585	108.113	156.491	65.615	137.377	102.959	245.35	57.3657	70.6658	60.5244	157.473	38.0055	177.875	7.56197	133.543	79.6458	122.124	74.5881	197.044	32.27	145.057	30.5105	242.432	7.98148	166.272	98.5056	53.3525	100.236	255.667	73.1332	530.134	33.2582	131.437	111.75	204.735	67.2522	233.595	89.0227	198.241	79.1853	138	57.884	181.611	81.7015	166.807	101.103	155.021	50.2669	89.3957
1552554_a_at	48.6195	5.94858	63.4257	3.99506	8.59452	76.839	38.3881	6.47845	4.68272	89.5739	47.0979	28.8336	48.3225	3.38835	46.225	3.27489	59.7811	9.64683	59.2054	57.23	52.9761	8.71622	55.3862	4.79636	9.24274	8.18162	22.3722	6.67113	45.0221	43.184	173.584	38.5018	49.336	29.4704	45.8946	43.2315	73.7642	36.2087	30.0596	60.7198	2.04521	20.4045	61.8589	42.9598	68.9383	43.7015	86.7641	29.0525	39.1829
1552555_at	54.1286	123.638	75.588	28.9129	100.772	150.547	167.015	43.2169	60.5227	51.6144	91.9403	43.6652	137.594	41.9051	134.516	81.4094	139.364	20.4554	101.169	25.3188	158.725	63.4651	33.0815	121.179	154.104	112.344	122.448	141.183	105.157	57.9723	304.04	74.6548	111.776	59.6016	131.754	63.4581	87.8877	89.0613	118.95	33.7493	73.1268	112.699	98.8872	73.748	34.2908	87.8097	145.115	10.5153	50.0143
1552557_a_at	225.414	191.226	30.0373	170.078	167.577	98.2955	94.9759	141.885	57.5631	78.5073	34.2259	172.082	109.287	198.155	82.0898	169.297	156.319	146.614	25.5869	221.084	32.5749	130.307	124.858	130.08	90.5066	152.074	85.7882	153.135	96.8738	163.313	346.91	175.792	192.759	158.171	197.142	156.019	174.042	188.382	56.1696	203.579	153.86	161.845	225.48	164.401	82.882	93.3051	132.203	134.301	187.731
1552558_a_at	183.061	302.549	225.784	358.987	134.637	189.607	143.897	114.078	161.287	245.741	206.399	199.634	168.316	184.1	159.074	209.668	120.267	230.204	163.34	228.585	201.131	319.66	261.358	240.52	164.159	173.914	156.453	220.232	165.158	232.652	473.937	231.328	226.389	301.949	229.039	140.588	125.569	190.37	183.097	154.815	126.329	191.912	106.834	210.972	122.597	265.874	210.839	206.564	226.372
1552559_a_at	12.044	8.71802	9.72835	23.3879	11.5901	4.43757	38.5623	14.284	12.4857	12.1325	10.1607	29.7714	15.4919	24.4112	6.56035	26.4598	11.3739	8.09767	8.69332	8.29197	2.80179	19.2777	14.1143	17.9279	12.7325	20.4246	7.18171	15.2106	9.15261	14.2627	150.061	23.1426	12.7917	14.8195	10.6805	12.4	12.2144	21.3092	4.85488	22.5907	19.9884	6.24115	2.10483	11.6386	14.3676	12.2517	7.88956	6.20435	3.8868
1552562_at	90.4438	156.097	102.352	73.8483	107.162	46.2353	93.9603	145.679	55.4149	76.0004	126.96	84.2279	93.8352	85.3185	82.8873	83.2964	94.3136	41.6026	102	64.745	73.9526	101.788	86.939	125.582	72.9624	151.97	117.198	160.764	61.0985	82.608	351.363	164.279	149.289	112.107	118.043	79.6609	94.1426	85.9138	79.3358	99.5815	92.5717	99.4172	117.306	89.1893	140.667	78.0615	125.431	106.173	144.29
1552563_a_at	44.6177	46.4601	47.1977	120.179	145.313	92.836	43.8379	44.2237	67.889	51.9863	92.8931	86.1408	49.3607	63.505	31.321	80.7527	43.4155	32.8688	54.1561	27.9234	11.4846	87.9081	140.795	72.6828	66.8364	170.885	117.465	147.127	159.115	71.0566	279.906	65.1662	23.4301	128.79	41.9156	5.78202	9.86875	100.634	26.8523	75.6571	6.09378	48.1539	32.8052	75.7869	109.63	136.702	18.3847	101.584	68.7241
1552564_at	33.0868	134.416	86.8482	75.4103	100.378	170.437	13.3938	108.86	60.9114	41.3084	70.0693	72.3015	51.9045	122.642	46.3201	71.8391	91.0492	74.9152	93.4464	107.29	72.0948	85.7138	110.608	145.74	70.453	93.0721	105.933	102.835	84.1808	44.247	429.519	48.1088	56.2241	80.7243	72.9519	98.6384	73.9183	78.2998	86.0972	81.5912	98.4958	47.373	59.9421	64.54	126.897	90.2047	79.4362	137.143	108.159
1552566_at	18.5484	3.23952	29.1153	4.02758	9.06509	6.36492	187.606	7.36354	1.44888	1.91777	61.0185	3.46539	3.35542	8.23043	2.57155	2.56615	2.11195	12.039	1.67973	10.6366	4.76919	6.40772	9.8327	2.40168	72.4264	2.0235	3.05479	2.5284	4.5766	4.34989	55.6588	2.15284	3.58984	3.31811	43.9778	2.23979	3.50901	2.05123	2.55817	3.39955	9.24741	1.91266	6.03847	3.05118	11.4549	2.8382	2.47079	8.70177	28.2328
1552568_at	4.78208	36.9071	29.251	41.3937	7.3635	5.64332	24.7911	27.3832	27.7261	4.75638	2.17705	5.30824	5.29959	23.4425	89.2474	51.7074	2.43147	21.2081	18.4293	4.34718	17.585	23.4514	4.0116	11.2828	28.6017	6.85922	5.33845	41.7045	32.7334	2.98558	422.972	5.76385	28.0608	5.63422	9.65756	2.90783	3.39669	52.3054	4.06967	27.3321	4.64175	4.19698	9.4143	14.8521	20.4732	88.8346	6.87161	16.2658	42.4631
1552569_a_at	44.2621	13.4549	38.6103	63.1954	64.5797	9.51346	49.3167	13.3883	34.6088	57.7904	34.7508	9.65791	28.6395	5.235	5.99538	64.4568	7.27627	10.3467	29.5176	55.4603	61.1779	17.5892	8.82172	75.6544	17.2137	66.366	34.5289	102.722	28.9262	8.38249	85.1081	7.17167	9.89955	123.083	13.1831	5.35854	48.95	82.5048	5.05471	39.8329	25.9218	102.163	5.80151	135.336	25.064	28.8514	5.3621	10.2566	30.6574
1552570_at	13.6278	113.762	45.4967	128.181	6.6379	98.6437	2.15936	113.293	46.8993	7.47048	27.6688	100.872	15.9761	84.2654	5.8776	47.5632	0.98644	36.047	25.3477	46.4757	34.2743	35.0256	1.35419	96.0142	49.4796	39.8581	45.6426	43.3581	36.5735	18.6565	256.443	50.7213	45.0317	83.3	32.1929	42.778	56.0334	66.7971	34.8888	88.8212	41.6791	4.28095	53.206	11.3097	17.1018	14.8446	42.6467	61.7825	40.1875
1552572_a_at	47.3372	7.41547	63.0391	5.64805	31.8191	19.6394	6.72519	57.3928	23.0258	21.2229	50.4519	37.3087	26.0036	91.8003	53.699	21.6776	57.7597	2.14825	26.4637	48.0663	30.6426	41.9063	14.3455	26.9248	4.87773	77.4611	71.1293	36.1285	26.9122	23.6408	218.31	23.846	36.7323	1.6392	37.5939	60.4028	26.498	6.02819	23.286	39.7234	37.4672	18.1245	44.7744	32.6824	19.1598	41.5339	69.4875	16.4566	58.9165
1552573_s_at	12.603	35.0052	42.0489	188.349	75.3547	60.3722	57.9365	102.138	61.6078	38.3372	10.3054	131.962	22.8619	69.4097	53.788	113.713	78.7998	7.22744	41.5638	34.8404	74.0184	161.833	12.5975	104.991	5.87846	65.325	105.61	48.5651	30.8773	43.5557	45.0359	75.3114	161.627	65.693	5.10504	116.385	45.6255	91.816	52.2606	78.6627	78.7127	111.324	51.1979	136.876	59.6181	83.6513	75.301	127.74	55.8136
1552575_a_at	8.41041	13.7434	23.4129	23.6889	160.757	184.52	201.941	14.4468	22.711	9.83033	16.525	41.4823	12.9213	7.85494	8.81129	45.3113	39.7316	67.64	68.0415	8.50713	127.595	15.984	11.9877	21.3251	76.1657	15.3399	78.8706	94.9655	132.404	57.4729	176.242	40.9856	26.2155	24.7754	38.5014	13.3948	59.5036	49.6623	7.7412	96.8736	48.6631	5.88912	65.2661	44.6293	8.63248	85.9885	7.21927	72.4002	70.9968
1552576_at	26.4096	87.6397	34.2488	151.018	55.836	109.634	45.5802	120.907	25.3027	104.273	16.9322	19.6656	58.6491	151.872	21.2891	27.4063	81.5813	102.495	57.2396	27.6714	71.6638	59.8069	78.6519	84.1976	75.7202	64.0352	103.789	4.1509	131.723	81.5926	324.119	33.2015	40.6495	122.264	75.3141	82.581	87.099	120.368	65.3407	155.503	80.1229	35.3797	50.4547	23.3202	69.5013	22.8706	133.953	32.4025	77.8222
1552578_a_at	1.35497	536.271	68.9154	312.073	216.799	124.53	99.522	549.45	553.473	184.078	1.50863	613.262	101.773	569.443	50.4386	159.511	10.942	213.414	40.582	305.654	41.6758	516.249	5.68203	410.586	59.4947	523.987	250.068	568.466	59.3898	156.74	246.92	602.608	16.0193	345.233	38.3062	313.339	5.16475	344.888	2.60256	290.043	33.3924	169.34	3.88644	135.542	2.82163	180.394	52.8716	283.759	67.2196
1552579_a_at	23.9485	36.9413	3.17632	51.9113	60.1911	67.4039	2.43942	78.3184	11.425	71.5733	45.4656	47.0045	11.3527	8.53802	50.9997	32.9174	42.4538	11.9352	28.4574	8.64899	36.1097	7.18375	31.1412	51.0325	36.8012	15.7479	4.4046	32.9153	6.8308	27.8014	135.98	13.6297	20.2642	10.7355	7.33399	32.7964	25.433	26.665	44.1869	42.2867	74.8245	3.53758	3.61461	19.0353	2.19948	34.3895	62.7513	6.3912	21.3701
1552580_at	2.24631	11.5826	7.07463	10.8883	26.0617	5.04731	33.6067	15.1287	33.6092	6.79841	4.1254	3.41711	50.9079	7.71594	2.64613	6.31909	30.1338	5.22821	6.09357	5.98238	16.9687	51.1238	8.24351	18.8333	3.42524	3.68759	9.12312	4.66171	3.15319	4.8053	282.087	4.20485	5.89492	5.07514	3.79731	29.7524	7.39225	26.6784	3.9897	5.12496	38.5034	21.7857	41.99	9.91723	6.18851	4.0565	3.97561	4.08166	38.0404
1552582_at	23.3394	36.8703	17.0894	39.3864	5.77471	1.10866	47.5828	3.1957	36.9574	76.5291	1.52234	21.617	39.5881	2.43906	5.17655	58.57	9.88964	37.2329	14.7629	9.02068	0.911752	37.5206	17.2847	37.1472	18.6553	56.8281	50.8903	55.9048	26.1895	28.28	82.4885	73.1725	5.88076	85.6138	19.6399	39.2786	16.6463	4.31566	4.8362	45.5645	7.17126	8.104	2.74844	47.2891	16.2092	20.9013	6.6708	45.2885	1.80072
1552583_s_at	7.69136	8.25225	5.24938	22.5137	56.0053	19.6874	95.4007	46.0345	9.91319	81.2592	3.627	9.8575	22.7885	37.5242	9.57391	3.46248	6.5222	24.641	32.1506	41.5527	81.6435	7.58598	3.20465	41.6608	25.2111	4.5195	56.6555	11.2297	5.92198	42.6078	18.7243	30.3876	8.25727	127.863	35.437	24.8814	30.0207	60.306	5.65686	56.086	5.64968	27.4288	41.2295	9.33681	3.27633	13.9084	70.448	15.994	116.831
1552584_at	215.858	91.3937	714.427	76.1741	191.96	400.961	271.115	12.6961	123.508	68.9073	314.788	73.9071	640.59	74.5382	339.224	110.576	223.451	41.9283	509.538	130.257	181.45	136.834	878.541	29.8792	221.235	99.9815	115.524	43.6169	1014.65	108.661	200.836	165.628	191.006	87.3336	335.401	135.339	274.977	110.169	325.696	68.5229	172.452	80.9597	158.957	97.5348	496.861	96.3336	219.488	10.8559	158.427
1552585_s_at	50.667	67.6649	44.6456	57.4044	33.5225	2.0114	32.1519	53.4564	44.6913	34.0664	57.8618	47.5515	48.8663	60.5354	33.7368	2.20996	39.7796	73.3827	19.8668	25.7414	5.85167	27.3833	7.57839	37.5093	45.8084	85.974	55.5625	48.5222	50.5473	65.0996	199.936	2.61194	30.6696	48.9158	41.0985	38.205	2.85313	12.411	5.7402	63.7504	133.013	92.0408	1.26671	13.315	44.7094	103.559	57.8222	20.7761	43.1747
1552586_at	34.719	123.969	15.4346	111.887	109.414	24.528	69.3419	81.5683	59.9592	21.2731	38.6465	16.6874	60.1537	44.3397	12.3703	49.7553	21.8579	15.7806	36.6869	72.8442	25.1235	114.776	28.245	92.1835	53.3456	47.5042	3.65602	36.1924	82.39	44.5965	303.182	43.1017	65.3866	54.0817	51.881	50.4216	20.3274	5.87562	18.5711	52.5401	46.7601	54.7118	19.4436	6.18469	5.57388	33.5643	77.9737	72.6616	115.16
1552587_at	16.0433	70.3287	0.754061	71.4895	2.99528	7.57484	40.3419	7.48332	15.549	17.9815	33.5387	31.4098	38.5187	4.75951	29.6515	55.7848	28.0054	4.3133	17.8049	43.8092	1.21211	75.886	26.2508	24.8095	54.5483	59.9767	37.8444	51.0908	17.7516	53.6703	59.2035	29.3787	61.4091	54.5082	33.1577	35.8188	20.4851	31.097	19.8385	51.1284	12.4104	21.2223	18.1944	21.2973	46.5261	22.8066	41.4104	53.911	67.3493
1552588_a_at	32.1459	2.03867	37.2472	33.202	5.71249	2.82206	1.31427	25.5598	22.7996	6.8512	3.35608	25.5561	3.01967	5.48062	6.20487	21.0318	8.67308	12.8482	43.9318	4.0257	1.46144	18.6374	7.78138	41.0259	11.7849	41.6877	1.89898	7.20789	24.7247	3.92625	13.3226	16.5838	2.43245	3.24278	2.75365	3.46663	1.91569	35.3374	5.16589	7.34112	1.43862	5.33427	4.90905	2.24571	1.98059	3.28166	4.28438	15.5187	3.93423
1552590_a_at	33.5381	44.9481	18.8602	96.4882	3.39168	4.3586	13.0769	40.5466	36.8355	43.0008	4.69338	61.7668	33.3379	39.6459	2.05108	13.9198	2.38787	63.0043	11.5484	29.8898	1.72696	59.7721	5.90838	5.90114	22.0659	78.6497	33.3897	6.92314	12.3639	55.5112	546.854	8.01388	51.038	46.2496	33.612	10.9373	34.1842	42.5664	2.96511	23.6781	6.94276	20.281	4.74392	42.578	32.0459	12.4952	3.64989	2.45306	41.2567
1552592_at	21.0817	4.91593	4.10959	42.1229	8.71163	1.12765	21.0866	7.36177	16.8211	56.1688	3.57515	30.1842	20.2139	20.297	2.96954	16.6243	20.4567	7.47637	23.0512	52.9456	28.1344	5.09101	17.9529	1.71792	2.07647	12.1568	45.7809	8.63824	12.8214	5.56907	17.8308	41.8709	33.5223	6.93875	25.2712	37.0497	59.2629	57.9179	27.6727	18.8247	14.0315	4.42327	3.02524	19.7028	62.0993	51.9278	3.32477	37.725	21.5002
1552594_at	34.3282	126.562	32.3338	43.239	234.917	34.5767	20.986	115.081	53.642	19.9819	124.717	45.9887	66.6116	63.2554	56.9129	21.422	21.4331	18.1682	13.3174	30.9589	69.933	16.8556	91.7815	14.9689	15.9849	11.0012	73.194	13.6714	97.0272	47.6814	128.73	27.9754	22.4806	22.1223	15.8582	17.6548	7.33063	15.5663	46.259	17.1657	28.3732	31.0672	13.0105	67.7889	14.9084	59.8813	23.5286	108.329	14.622
1552596_at	19.2083	207.492	72.7318	185.941	61.7082	27.8128	117.917	34.4701	16.5992	78.1214	18.9583	29.0957	23.7653	49.8728	15.0171	110.267	47.403	71.6675	15.9086	109.29	25.0357	187.372	83.2639	139.955	19.6652	255.031	197.398	63.7705	64.0978	45.2929	252.213	130.439	84.9487	160.922	22.1437	27.5685	19.6892	26.1755	14.7593	147.081	20.9629	218.488	37.955	81.3056	20.8186	165.268	23.5054	44.0745	98.0301
1552598_at	6.55947	15.823	3.15818	143.337	40.5457	33.3724	53.6482	10.2902	37.3688	18.1882	64.9406	75.4675	48.1385	17.6468	11.1845	66.7495	64.4464	44.6148	6.84792	48.1926	7.31959	8.71745	9.7087	64.2657	61.1561	13.0426	11.5867	13.7489	11.4152	85.4862	160.154	75.5876	22.2669	73.2638	41.2171	43.4306	22.7828	6.49803	2.63639	23.0434	62.021	9.06792	10.4112	28.5991	49.008	69.5557	20.9271	59.2336	101.869
1552599_at	34.6243	69.8802	6.38473	145.422	73.6548	36.8151	53.5942	54.1491	33.7142	49.7778	52.9188	55.9844	41.5804	10.3065	3.06619	26.1723	5.34137	35.2363	49.2321	57.2416	38.7156	5.30568	45.2063	41.0358	40.6581	55.8058	25.9068	8.43921	34.6171	7.88848	211.616	49.213	66.5756	43.5382	51.1955	56.5591	32.1422	21.167	48.5555	48.8443	38.5577	64.2553	69.3389	7.42413	60.1728	51.3006	51.6603	2.36544	26.6816
1552602_at	69.623	73.1482	87.8227	75.5371	84.3761	83.0391	151.324	168.807	32.7421	105.999	83.4394	66.1166	55.3469	101.439	111.335	133.941	84.2465	193.494	61.6198	131.863	77.7556	149.344	21.2407	185.042	16.7641	55.3982	168.906	98.2308	117.091	140.022	314.905	27.9068	134.95	79.3844	59.6484	109.84	49.4682	89.2375	29.9365	109.047	89.3515	116.776	133.831	130.74	123.303	121.341	77.6099	74.8781	66.9031
1552604_at	3.92283	55.498	3.18313	27.5476	18.3329	35.4294	64.303	81.4199	42.2854	4.90752	44.6823	38.8792	3.72251	67.4807	5.39839	47.0614	65.7869	22.556	39.357	52.9759	29.4748	9.95085	44.6714	79.2923	17.8075	67.3141	26.4487	56.7629	39.3892	44.7984	282.243	19.6797	55.7882	56.187	3.73764	49.0785	41.7838	62.7671	5.73017	11.3361	48.2086	21.7242	2.4479	85.3683	34.6723	9.14021	15.2691	24.6104	36.2785
1552605_s_at	29.2652	100.658	33.5683	26.5565	88.1681	10.0789	25.2578	69.6253	21.4199	66.7511	56.1262	34.4896	6.9692	10.281	2.05572	55.5327	39.8572	51.7229	35.3344	5.98706	27.5311	38.7369	60.9485	35.3625	26.2112	3.83279	45.6187	29.6561	38.2739	17.4337	420.547	84.9898	33.7629	19.4347	28.5639	22.6442	28.0807	30.6054	9.53494	7.68733	32.9948	49.5868	41.1824	59.5635	25.2442	23.0975	23.7461	38.0492	40.2879
1552607_at	92.3235	106.542	62.3275	21.8818	88.6252	191.113	63.4959	66.6636	86.9319	79.7443	66.3687	63.1415	98.7177	78.4459	88.6704	86.5868	109.442	93.4872	96.2036	92.1601	90.1289	46.5453	96.8116	21.9229	112.974	58.8812	74.736	99.6117	82.1031	51.4881	294.857	40.1656	110.973	98.6668	77.7392	15.8636	106.243	127.003	116.018	38.262	124.715	47.6209	24.5364	63.4235	79.8986	98.0763	55.4182	59.6115	83.8766
1552608_at	12.5894	9.65346	3.62873	88.8808	10.2617	52.4463	50.4365	6.26936	6.27193	10.8668	3.25861	8.80214	3.90697	5.18874	2.62553	3.78111	2.94378	3.73269	5.15664	6.30118	7.29292	9.38138	52.7893	6.32994	35.7527	5.27045	10.1446	3.23932	39.8223	6.28674	349.786	4.23391	2.9922	9.71773	4.34875	6.6498	5.89544	4.75882	5.50254	7.60823	4.77707	5.68536	6.37257	5.9525	27.2546	7.18684	48.6398	4.77128	41.9182
1552609_s_at	32.5999	35.5987	1.65223	9.36883	15.8845	47.0309	79.6546	76.6313	37.5698	30.2006	26.105	6.92501	43.6255	55.18	33.5812	24.4666	60.4831	26.4478	49.1054	60.0986	62.7121	64.2065	46.2559	62.082	13.7594	43.9159	60.7769	45.2999	7.41067	25.0479	247.423	71.3807	55.1199	66.9749	30.6472	16.4514	26.8335	47.1425	35.2342	75.8512	31.6457	50.1734	21.7143	48.6647	63.216	7.96726	60.9307	35.1495	6.15355
1552610_a_at	2810.25	1015.91	2129.92	1074.32	1651.71	1762.05	1572.99	1431.72	1983.77	1369.39	2496.85	1189.53	1995.84	1427.97	2175.45	1284.42	2787.84	1501.2	2505.09	1152.15	1790.59	1112.61	2212.07	1230.37	2100.41	1030.48	1593.15	1182.04	2436.61	1334.83	1105.06	1214.82	2828.34	1370.87	2676.32	1783.17	2684.6	1900.13	1956.95	1310.06	1518.89	1471.75	1798.22	1427.25	2160.68	1551.9	2646.03	1411.8	2608.76
1552611_a_at	1184.08	766.642	1124.36	516.898	798.372	572.595	631.482	462.365	507.657	319.062	534.279	455.933	693.362	569.87	752.801	441.079	552.767	377.337	475.553	242.679	736.716	399.852	804.837	525.556	588.854	484.894	508.976	395.968	617.643	352.252	601.985	384.301	736.047	381.217	745.04	419.179	696.879	585.707	426.194	379.961	377.223	293.113	470.996	255.732	862.969	571.134	596.52	398.012	828.677
1552612_at	432.698	520.39	504.29	292.714	254.206	378.748	229.629	206.491	316.467	342.825	203.552	271.585	444.333	357.752	538.861	287.8	394.606	270.279	492.421	357.338	550.87	491.772	990.775	472.532	586.367	423.292	381.167	262.973	797.466	446.949	249.476	389.256	335.133	337.148	750.368	541.056	487.734	383.139	240.566	435.642	364.255	282.472	310.657	244.447	264.875	266.813	751.267	425.027	637.213
1552613_s_at	666.718	401.138	598.139	252.265	355.193	488.257	232.315	286.316	414.8	382.934	250.875	191.777	381.84	213.059	616.125	384.779	498.758	225.712	598.596	303.279	451.268	346.185	794.293	271.636	549.668	377.79	302.942	176.081	808.998	427.573	869.16	333.663	262.668	190.5	771.583	628.572	595.235	431.498	349.87	390.532	360.091	294.442	283.567	365.902	159.512	257.488	636.485	310.46	625.385
1552615_at	244.217	797.113	268.426	934.88	315.346	373.699	320.368	783.224	397.771	736.353	402.596	521.124	400.198	640.362	327.924	553.821	354.332	380.737	291.911	563.849	428.954	900.414	576.29	803.942	273.615	683.226	446.405	733.473	205.928	744.589	270.204	550.462	500.215	1031.94	356.356	450.221	311.156	655.12	310.712	650.299	268.344	478.497	320.693	445.467	437.134	693.614	484.772	680.57	322.118
1552616_a_at	115.059	180.816	63.78	137	31.1581	113.383	99.4996	104.804	99.581	123.053	43.2111	40.9819	62.2943	126.261	111.387	149.601	49.0445	104.986	48.9535	170.242	89.7417	114.139	96.5104	217.902	105.419	93.7683	106.235	90.8707	55.2588	113.262	240.245	81.813	119.883	166.065	93.8935	112.763	70.1997	194.939	14.7294	122.394	50.4796	130.994	83.7088	109.037	64.2717	110.931	139.258	74.8069	99.2134
1552617_a_at	591.941	610.24	815.562	524.504	761.49	837.958	764.571	767.244	597.956	613.505	536.882	554.692	730.106	603.213	619.09	676.914	699.316	474.926	717.583	643.644	558.93	783.945	802.068	652.268	646.688	466.676	571.053	413.602	778.37	628.514	862.139	511.703	734.594	635.944	654.452	748.645	698.816	653.638	710.379	605.206	482.124	619.735	596.141	748.617	577.346	608.21	812.463	662.439	739.594
1552618_at	217.541	217.782	274.714	289.86	278.747	197.8	403.629	335.599	160.522	248.154	187.478	225.465	291.441	280.981	290.289	287.265	221.208	230.236	260.289	212.107	271.037	331.075	310.365	311.009	207.202	244.607	178.11	176.273	361.914	240.293	261.502	271.852	297.945	199.617	343.122	287.196	240.326	176.877	189.249	168.028	237.204	296.501	258.392	213.382	457.31	109.027	285.04	342	348.95
1552619_a_at	54.969	3.20159	124.175	41.4556	84.4977	21.2649	372.28	3.86756	65.1053	47.7366	67.4928	3.99101	123.488	26.7119	121.232	78.7232	99.3036	5.7019	72.5601	27.0609	109.465	67.4435	154.601	9.7398	152.319	34.2132	106.371	65.9895	105.085	41.1009	293.876	54.4481	133.058	37.7933	108.355	69.3995	78.3566	33.0817	106.286	71.1193	105.951	46.1893	184.431	56.6831	93.7071	100.473	175.242	4.38381	137.496
1552620_at	190.503	338.491	256.793	298.119	259.998	348.833	214.34	387.344	211.748	113.423	252.019	415.395	306.428	336.421	241.812	171.745	289.785	186.049	238.666	352.995	292.919	324.829	312.886	154.718	397.616	556.198	333.184	509.032	203.353	410.826	1016.85	386.535	366.313	501.403	393.168	217.184	263.512	270.435	242.818	170.217	276.112	101.904	192.984	238.37	324.573	499.712	233.122	295.656	296.883
1552621_at	2859.52	2448.97	4447.7	2461.85	1876.07	3234.55	2302.42	2268.72	1526.28	1584.98	3982.5	2825.74	3553.53	2947.17	3735.69	2097.1	2549.67	2188.71	1349.21	1046.72	3337.5	2207.13	4004.58	2987.75	2349.15	1803.02	2858.18	3496.18	2936.43	1839.89	667.462	2587.46	2753.44	2075.89	1115.16	1059.26	3338.44	3349.94	2485.88	2237.09	2637.84	1767.07	2399.16	1302.67	6829.41	2107.95	2722.83	2679.33	3983.49
1552622_s_at	1789.83	1498.65	2931.13	1750.44	1037.87	2089.02	1252.23	1484.7	711.048	935.961	2318.49	1670.48	2012.92	1815.46	2335.42	1126.19	1715.14	1146.48	703.142	769.359	2216.16	1681.94	2412.92	1758.83	1553.05	1319.59	1802.43	2162.12	1367.96	1056.8	425.174	1629.06	1625.96	1510.48	627.799	649.756	2027.03	1978.1	1343.58	1502.02	1500.81	968.728	1295.88	709.259	4229.62	1314.22	1821.58	1443.98	2589.24
1552623_at	35.194	14.6271	79.369	75.7603	22.4932	93.4235	72.5176	17.8828	61.0407	6.51551	10.4664	8.91566	6.87852	7.49009	22.3529	4.4565	9.86238	4.24636	19.7834	6.13033	62.7643	11.3838	118.969	9.88799	20.8523	16.1708	130.134	51.4711	73.8511	14.0719	57.6409	4.22886	9.21689	6.91491	44.9109	15.0545	4.83654	40.5824	24.64	7.13443	4.59763	8.48035	7.87838	12.0616	3.63225	5.66788	8.71692	4.94691	3.56292
1552625_a_at	245.668	516.136	313.171	388.481	467.265	489.078	184.113	617.392	431.343	406.101	195.786	364.041	227.446	450.497	257.268	304.853	228.518	483.635	200.92	355.936	206.608	286.411	288.955	316.991	404.526	330.728	431.079	357.785	364.917	343.071	869	340.065	242.561	408.44	288.234	390.849	208.336	434.042	228.094	511.64	244.846	480.646	236.699	389.625	148.193	387.988	239.686	509.661	297.196
1552626_a_at	270.916	270.777	254.042	199.251	341.248	403.88	354.283	211.349	261.197	223.775	198.035	246.093	187.378	129.535	43.4127	124.691	140.089	209.419	228.785	34.5226	302.926	466.855	90.8097	91.0184	445.642	98.9214	147.85	75.5919	189.197	172.405	254.778	206.951	78.0556	116.39	202.569	125.194	145.543	97.2268	265.557	237.337	89.9084	122.182	173.209	50.0785	372.586	129.609	163.062	192.382	180.8
1552627_a_at	282.815	354.059	335.464	247.304	207.901	230.665	171.889	498.408	389.282	276.408	236.008	410.289	196.852	387.822	251.17	404.147	364.955	299.308	298.112	273.296	314.8	369.057	248.037	360.616	274.054	246.743	299.532	282.315	192.914	508.818	362.241	430.867	312.929	528.4	368.551	432.371	304.75	344.731	221.788	412.091	260.907	333.726	153.707	336.366	203.548	271.456	433.197	514.471	359.465
1552628_a_at	3916.74	2343.88	3524.24	2450.42	3525.1	3227.32	3750.69	2394.71	2817.06	2077.15	3095.92	2050.16	2845.16	2144.86	2901.49	2553.07	3264.55	2939.72	3018.22	1946.83	2617.37	1690.84	2602.33	1862.9	3276.08	2616.3	3366.27	3142.37	3406.7	2166.94	868.68	2344.6	3501.62	2302.36	3297.97	2647.02	4009.69	2804.39	3587.96	2923.96	3498.39	2299.96	3310.45	2011.16	4075.09	2714.13	3008.87	2908.89	2725.18
1552629_a_at	1.65072	4.52404	4.46654	9.51585	20.2586	9.45223	26.6618	6.5988	9.71322	8.76826	2.70907	2.01797	3.07778	16.7721	1.90023	1.68966	3.7047	9.50724	7.87339	3.71411	3.52005	8.70306	4.7798	8.34308	5.29545	24.4717	7.68377	2.1582	22.8883	2.62867	233.444	4.92508	8.058	7.92266	8.39793	3.82466	4.81602	36.5847	2.87936	9.28776	4.70546	16.2807	4.53867	1.54713	4.54906	4.79728	49.0422	13.109	6.67926
1552630_a_at	25.3483	20.2751	60.8396	17.5178	7.03452	14.5857	25.8823	19.677	60.5411	31.8602	75.7025	26.5423	44.1194	25.97	11.4491	14.9502	14.8801	8.55587	19.8448	15.2063	122.174	30.7136	169.789	27.8241	11.6129	32.624	77.4363	12.5289	20.0382	85.5201	256.464	14.667	46.2962	13.122	29.8564	20.2505	18.6054	11.3785	14.5618	12.947	44.6103	23.6787	81.2702	11.3594	66.402	47.0964	106.878	19.8804	143.37
1552631_a_at	93.7783	5.19732	65.5072	13.9362	77.8775	85.3494	60.1993	89.0178	106.978	120.599	81.7419	48.1446	48.6803	112.279	84.9704	86.2499	86.5084	75.8959	70.7322	50.67	196.891	87.855	77.3441	76.4529	95.6114	13.5575	74.9264	112.721	77.4255	19.4003	299.275	21.5877	130.976	116.547	132.514	144.383	112.221	63.3915	86.0411	91.5855	41.5076	85.9487	121.416	109.816	69.8563	36.456	119.059	79.3235	73.4389
1552632_a_at	228.221	115.713	200.764	210.827	195.55	115.799	174.322	119.149	141.92	189.559	141.315	130.879	177.568	109.759	158.905	117.308	138.283	106.022	171.196	101.903	166.558	104.656	211.183	153.05	211.374	105.392	194.955	101.865	101.385	150.008	415.093	107.613	82.5547	146.297	164.328	131.057	219.046	128.595	192.368	91.4873	250.499	151.894	183.882	151.394	127.35	135.992	183.78	135.524	125.258
1552633_at	235.167	250.148	510.057	352.351	327.217	432.256	154.737	254.365	148.059	148.813	282.843	148.355	416.51	305.611	297.065	140.974	220.121	144.783	196.493	122.594	166.744	153.708	497.22	191.903	213.817	261.183	221.307	253.975	612.469	115.368	401.115	241.634	273.212	213.514	274.172	166.885	199.686	213.748	180.799	125.959	148.406	205.046	227.81	92.6812	267.075	130.349	285.153	160.825	299.798
1552634_a_at	136.954	180.119	278.608	155.042	265.805	292.199	167.345	131.079	245.729	131.826	249.051	164.542	322.752	243.229	190.181	124.049	175.667	122.146	174.857	158.348	111.394	191.244	361.697	166.646	253.852	139.759	233.084	189.897	414.109	157.093	126.792	158.434	170.618	123.342	210.584	236.977	168.73	185.942	214.722	135.331	92.3753	67.6032	289.8	122.022	129.542	198.882	227.569	152.435	227.025
1552637_at	7.80825	100.581	30.5802	41.4368	9.77673	48.998	17.9552	23.5585	46.3408	11.2711	26.7169	68.7768	13.2819	66.439	28.1464	7.35413	27.9605	66.5748	11.0515	25.8693	30.8675	26.2166	77.1435	59.5648	33.2567	53.4961	66.1194	37.1401	28.5524	9.89443	74.7551	1.6348	71.0026	8.83596	18.1688	32.7183	28.3428	51.5046	19.2637	12.1685	1.37918	75.5281	10.3666	22.7974	10.5612	35.1123	24.411	44.496	58.15
1552639_at	43.2128	87.0022	48.0931	54.5765	69.7115	91.5152	160.011	19.0329	34.0116	80.2108	60.7104	97.3513	106.109	65.3142	48.1749	93.4033	8.81271	25.8146	36.7648	90.3458	66.7583	96.1604	114.313	74.3333	67.4029	89.3491	122.597	65.1514	143.675	101.625	238.217	65.5963	77.6185	15.4559	118.757	69.6481	63.8107	62.2778	31.5389	29.4656	29.8698	63.9614	92.0269	27.6718	60.0172	94.7459	71.5318	124.993	24.054
1552641_s_at	100.455	37.409	31.4651	25.2588	207.196	124.401	250.658	32.9713	55.6936	33.7078	247.14	20.7471	31.7703	30.5608	112.641	66.208	22.8311	27.7554	28.5424	22.0002	58.9042	36.2408	78.2438	62.6875	29.4416	10.2792	21.7586	50.2027	92.9348	24.5563	217.763	19.0734	71.252	27.7181	34.4817	52.1258	89.6359	27.6096	54.2471	85.9834	72.9903	17.7505	24.8921	56.7469	133.06	20.7552	27.2783	27.5088	118.709
1552643_at	190.838	420.245	168.008	287.139	309.299	202.553	187.464	338.472	206.973	277.538	213.146	255.763	249.715	172.637	303.202	305.522	216.319	223.519	168.744	227.912	338.639	359.351	221.734	362.487	189.897	150.943	228.66	206.589	170.06	252.731	390.124	281.031	237.624	339.6	226.511	305.357	241.494	288.363	123.684	203.565	211.054	412.009	234.78	228.885	152.133	218.459	216.564	249.329	376.287
1552644_a_at	132.945	176.757	238.446	134.79	148.558	156.796	185.88	112.272	121.143	111.136	77.6977	131.867	128.64	97.2368	138.703	104.322	122.176	110.424	103.932	106.163	108.481	157.707	126.164	164.695	108.204	161.504	147.345	180.919	151.024	130.814	553.952	140.182	100.124	108.645	134.988	205.669	109.778	92.1952	121.336	82.8306	93.9073	131.659	98.4507	83.6383	126.862	82.1858	107.011	81.2887	210.628
1552646_at	192.268	191.068	197.72	256.103	189.415	275.954	160.125	225.147	127.779	243.325	211.987	329.894	268.94	357.339	251.596	214.973	156.336	167.744	185.935	242.916	335.03	299.411	335.98	305.005	221.853	258.935	315.692	246.976	310.093	248.131	112.031	267.355	248.773	249.046	143.871	212.41	169.837	244.78	129.565	212.702	221.182	232.53	225.683	205.813	154.049	227.952	224.285	239.872	300.568
1552648_a_at	245.431	117.676	421.471	201.565	230.143	177.204	187.191	192.904	146.193	188.412	348.711	146.069	194.123	184.269	381.326	191.982	138.238	174.801	143.743	72.9637	311.812	138.57	441.635	180.687	127.779	85.0441	67.9299	115.008	460.359	176.946	785.92	83.2111	339.704	156.753	246.52	127.186	178.85	136.967	152.793	76.5754	207.081	153.511	152.469	137.952	204.776	85.1833	247.438	158.521	314.431
1552649_a_at	67.3618	44.4642	56.6553	61.8765	11.3738	79.4444	73.4954	63.393	45.3661	74.7009	38.6342	6.23563	29.9	27.7544	39.5768	43.8285	84.6826	41.3829	51.6583	32.9669	49.9614	155.233	137.04	89.153	18.9636	11.5228	26.9229	27.8463	45.0795	75.6652	616.232	36.2272	39.6596	28.0311	58.873	69.1619	54.8572	20.7567	47.0672	76.3776	86.0882	81.4793	18.2523	64.7392	34.3603	20.125	31.4455	25.5411	54.2212
1552651_a_at	66.576	144.621	121.425	184.653	150.935	82.549	28.4143	87.0702	104.986	210.655	64.9235	68.029	33.9862	94.216	99.6877	120.281	57.2246	201.99	104.668	221.683	109.116	252.15	211.151	180.047	124.053	147.982	143.601	146.525	85.421	149.125	23.3412	87.9774	30.576	94.5954	49.9631	38.9116	59.5756	145.511	87.1958	103.14	68.9517	241.188	57.6825	209.744	83.0404	65.2561	35.7834	87.448	114.219
1552652_at	206.058	202.192	187.787	296.556	201.407	174.747	199.506	138.165	283.962	125.637	160.06	202.712	204.733	183.989	255.13	165.698	226.895	252.493	198.801	186.529	366.162	279.976	223.501	156.766	249.963	408.189	199.114	260.88	165.291	215.247	953.952	251.402	337.746	275.721	237.315	169.597	144.96	218.462	207.81	193.634	210.013	241.499	293.662	203.149	251.473	232.364	223.335	164.09	251.478
1552656_s_at	186.448	211.701	108.436	211.263	33.5573	91.7583	168.136	184.733	84.3514	112.483	50.6816	142.481	102.915	244.86	144.662	99.8395	108.328	135.21	90.0617	42.7612	117.526	228.373	233.939	286.788	130.922	108.634	128.805	47.6008	157.703	165.646	399.239	156.964	99.6909	141.456	113.74	115.788	164.883	139.662	17.0988	59.02	97.1748	83.2521	79.4242	80.3345	141.004	89.4362	147.647	214.973	192.964
1552657_a_at	3.33998	156.004	8.42426	7.74308	64.3077	5.03521	57.7978	22.1619	3.1614	34.2056	19.2958	62.8873	5.0002	4.05515	13.1497	31.3302	9.40132	26.8893	36.8492	65.9416	4.19951	122.514	38.4674	5.03856	39.0619	68.6339	83.4676	22.7513	41.4431	22.056	72.0296	66.21	41.858	13.0136	14.3265	4.18396	4.2426	7.12944	17.4256	26.7548	3.101	5.04288	37.9544	2.93043	6.84511	36.7072	12.3562	5.82905	78.8441
1552658_a_at	39.8175	96.4149	16.2844	52.915	71.8481	171.165	87.659	56.4862	35.9716	31.7215	27.9005	26.5999	51.7852	64.9643	6.38177	78.9199	59.3156	89.3771	73.1757	9.73233	47.6834	120.916	25.9873	90.2826	81.572	153.595	122.163	90.9421	48.2092	39.0267	233.52	41.0525	66.4075	71.4661	36.8264	73.393	62.9056	51.3089	79.0932	74.5205	63.3046	73.255	54.7948	45.1945	82.0863	50.4303	104.128	78.6814	103.592
1552660_a_at	227.006	169.435	183.432	133.948	194.345	152.921	154.497	209.073	189.807	235.822	153.996	150.496	184.074	219.736	102.273	173.151	129.9	128.108	165.567	170.306	163.205	299.067	176.449	217.557	193.091	68.8444	121.781	62.5022	184.467	259.135	514.967	200.146	201.204	186.38	183.665	188.68	190.03	211.519	88.3681	211.307	114.107	193.195	143.981	187.204	132.631	114.377	212.522	253.814	226.861
1552661_at	1.04242	1.46606	6.07821	59.3239	0.937313	0.700952	35.4161	18.1734	11.5551	1.96753	0.650889	25.6742	28.0599	24.2556	43.1649	18.3908	1.58395	19.0943	18.6926	26.2335	2.85304	6.90994	11.1351	19.5118	7.34424	1.59719	1.81968	25.5464	30.0378	5.1676	141.683	0.646065	16.5935	0.446591	11.5508	17.1126	9.75924	1.63372	14.1034	12.7744	14.5221	2.22043	14.4014	10.2167	14.0883	1.69276	14.4525	9.16694	15.7107
1552662_a_at	89.6073	8.48558	30.7899	53.0296	11.464	13.6805	35.5856	51.5288	99.5895	57.1435	28.3587	71.7507	20.1409	38.7379	12.3007	80.8456	25.1406	83.7843	3.55257	15.4158	68.8602	94.9883	77.1186	158.529	10.2002	75.6383	105.294	14.3756	60.0703	41.4039	138.07	14.3686	67.4657	71.6782	51.0691	100.5	4.28931	26.0245	4.73916	13.066	20.602	65.8345	6.06053	12.4556	3.15117	67.0379	88.4431	46.2007	68.7072
1552663_a_at	214.701	317.546	169.318	266.124	227.698	283.723	183.369	454.533	185.186	249.333	174.578	262.073	333.968	307.338	183.984	216.605	233.767	260.875	232.909	219.6	282.642	339.858	189.653	336.325	179.081	221.886	250.024	202.196	193.206	235.246	648.89	316.465	316.032	429.306	314.24	269.858	158.804	193.238	144.243	158.496	146.241	44.2264	218.957	230.437	213.055	271.25	326.94	281.771	295.814
1552664_at	801.672	627.647	871.268	532.449	523.991	652.953	753.874	682.057	1183.07	398.659	356.491	323.822	549.704	482.774	675.928	465.033	498.792	697.927	422.907	313.32	388.087	377.407	812.111	722.726	548.037	578.896	338.636	387.967	320.576	484.298	813.348	306.508	678.581	546.12	485.456	649.895	657.164	305.677	330.098	524.906	606.214	515.824	673.884	523.244	321.901	309.769	406.008	475.019	1020.1
1552665_at	130.94	129.177	88.2137	160.952	127.063	117.26	69.6603	188.695	69.7	77.2369	77.0489	117.318	108.967	151.978	100.115	79.0736	54.2816	70.0759	109.258	89.0355	115.314	73.3009	103.499	154.04	110.705	81.7753	169.96	140.128	96.0091	41.3525	454.182	130.684	122.918	118.54	110.298	193.727	123.474	93.5479	97.4366	61.6024	79.1818	66.1037	61.8511	104.656	121.188	176.365	154.027	100.298	116.663
1552666_a_at	19.1904	49.3869	63.4832	74.8926	2.76721	5.05456	9.757	5.27756	18.592	13.1503	1.70755	25.6045	22.5327	1.58889	10.6163	7.96278	1.4582	55.4693	3.00545	61.3838	7.18692	35.3271	43.1352	9.32729	35.6962	3.19098	5.62404	7.21802	1.68837	5.00169	138.994	2.88772	61.029	4.00106	47.8045	5.60744	10.7011	4.95877	25.5924	28.6009	4.42912	32.9268	3.29136	25.2101	25.5935	60.6689	23.8741	13.0052	19.5295
1552667_a_at	404.655	217.162	164.028	146.316	446.472	318.06	191.535	171.1	268.735	188.321	486.635	236.739	293.893	223.06	342.115	174.903	242.364	197.817	379.395	199.679	541.051	326.567	456.073	286.094	306.922	248.79	223.091	242.26	254.824	210.337	985.1	169.716	594.865	253.035	266.758	170.485	339.775	156.499	341.861	197.412	370.67	95.0912	222.72	50.387	423.153	185.966	332.861	210.053	421.469
1552669_at	52.8525	14.6438	33.447	29.5305	14.7127	46.1936	3.50185	15.7567	61.7272	4.21971	56.0576	18.0516	71.1978	33.7923	42.0527	5.01159	44.1178	25.8789	39.6405	11.1116	10.8725	3.3412	63.8889	18.3279	30.3641	9.63735	14.6003	30.3823	21.3276	6.86222	41.4148	35.5868	10.4308	10.2066	79.1526	14.4499	55.5701	21.3665	3.31319	9.02471	43.6106	19.4325	32.9533	60.4414	10.9485	14.5015	44.5552	44.3983	48.4479
1552670_a_at	664.635	223.064	485.104	254.054	369.397	209.98	728.922	273.243	485.518	197.949	618.071	226.341	692.337	286.128	908.826	166.708	513.305	164.089	357.919	174.412	883.164	209.565	473.96	222.934	425.652	138.018	327.334	158.689	581.348	266.91	808.343	194.988	542.621	231.282	567.996	335.687	508.947	186.623	508.326	171.163	636.382	181.672	409.83	181.386	453.396	95.5246	705.322	209.431	726.438
1552671_a_at	42.5133	26.2297	43.1382	16.0483	57.7452	8.91801	40.3999	12.9066	41.7675	9.61562	29.956	9.87937	31.5029	22.6584	44.6888	8.46952	4.41866	11.4949	3.49051	21.5917	48.9395	6.00932	6.1155	8.7349	4.59182	10.6707	25.8475	44.9793	12.7081	7.47732	258.916	10.5185	27.5322	7.59196	9.34128	9.25576	4.043	10.2072	7.19589	4.724	8.24654	3.78996	22.4691	6.86971	56.4145	8.13457	11.8388	29.6609	8.8878
1552672_a_at	3.21479	27.1822	5.70214	33.391	39.7409	45.3705	51.2843	21.2548	78.5509	23.3369	14.6847	105.736	11.6484	8.04133	23.5174	17.064	15.9034	8.39701	8.48185	4.73083	15.1619	13.11	9.82903	99.7481	17.4236	21.0536	11.1005	20.0307	18.7815	17.1371	595.117	23.5684	20.7235	36.3989	16.2013	95.201	12.3238	16.4948	15.485	40.5347	16.6577	113.695	5.79915	13.9515	15.8169	21.9614	21.8835	9.87857	21.5375
1552673_at	17.2964	18.2158	1.35813	4.76719	6.8089	42.8328	17.4848	11.6085	13.8136	1.38472	11.4017	11.651	9.60657	46.9971	25.5249	9.33779	10.5851	23.4292	8.08433	3.33512	37.1575	36.9731	34.9682	21.665	5.12405	20.9879	3.93847	59.2683	22.1339	17.843	466.069	25.2776	42.49	10.9854	1.95881	1.05299	13.5729	30.3286	3.44296	28.3409	5.62351	3.87499	1.59273	46.4215	27.3191	41.044	1.4109	1.09302	27.5841
1552674_at	40.0239	8.00782	6.34657	43.3407	39.9779	2.984	18.1035	0.747555	2.99665	3.23829	17.2912	2.63348	6.05779	26.8551	18.989	48.8685	17.5924	53.8032	27.4945	20.5882	26.0166	14.6488	4.9279	5.44465	40.7691	40.6508	11.3992	10.8309	4.70533	21.3676	145.17	3.78815	3.00501	7.43746	5.49647	30.5445	5.15305	23.7761	7.71027	25.3594	20.394	3.71829	22.9479	26.2999	27.8277	18.0013	22.4139	12.6252	9.37398
1552675_at	20.4344	5.09385	5.34647	29.3854	1.97535	1.81329	1.76692	21.2356	15.4553	39.8037	28.0157	25.5093	2.45047	24.0331	2.49095	0.841008	19.6007	31.2915	7.05919	12.299	3.53739	45.3983	3.08937	21.4422	27.4086	4.00459	2.07918	30.7642	10.7269	27.8234	350.186	2.78901	22.3647	6.57953	3.84149	14.4897	43.1963	4.78142	0.573046	23.6316	16.1129	19.6182	0.44216	1.83717	21.6596	23.4177	17.4998	34.9269	11.103
1552676_at	21.3994	25.0751	7.6357	84.6666	94.1632	123.426	123.66	58.8732	79.1952	119.339	47.5722	16.9473	133.66	128.53	16.5644	10.5167	56.2629	15.1041	5.48931	22.4341	168.146	204.157	46.5054	28.6514	75.1918	117.983	24.7164	6.39796	68.7085	65.3384	386.992	66.6544	116.325	117.727	89.7602	117.14	95.3719	93.3538	56.8739	68.8504	21.9974	106.12	130.399	50.8953	60.3059	87.7502	93.3106	128.863	120.374
1552677_a_at	407.071	109.82	234.865	188.324	106.151	191.443	144.068	170.645	206.75	72.3389	163.328	144.989	157.178	185.861	275.647	128.863	242.056	140.878	196.945	119.484	259.245	50.3442	249.734	100.653	164.069	58.6749	142.65	161.227	233.216	203.567	384.557	75.0027	207.465	147.394	218.272	226.267	273.402	107.739	177.417	152.424	215.416	154.362	211.132	40.4866	127.359	130.961	335.218	144.392	278.469
1552678_a_at	126.912	204.7	126.453	37.1799	183.506	213.184	98.9932	232.128	426.164	416.626	245.979	328.013	222.742	210.234	165.978	113.357	165.266	66.2649	138.87	213.503	130.585	165.269	215.941	230.445	123.736	122.216	191.298	238.14	177.54	184.553	335.024	173.226	152.06	238.856	226.981	170.479	109.164	124.805	165.556	183.78	166.642	189.078	190.903	153.763	143.243	173.788	192.988	179.44	164.33
1552680_a_at	14.8989	59.3366	37.837	118.1	59.0379	47.55	65.5797	5.93304	39.5574	63.7949	98.9172	42.1281	40.695	90.2445	55.2004	78.8422	10.7381	11.0739	5.01174	30.1359	41.8754	79.2104	97.1319	8.90752	28.4974	158.657	8.7902	81.1016	59.329	31.7462	221.817	57.3004	9.29723	77.3055	62.8826	6.57778	40.8996	100.031	31.6497	56.9769	62.4234	46.2328	41.144	20.5896	59.6806	70.8141	53.4089	5.20352	5.95017
1552682_a_at	69.897	44.4951	58.4586	206.841	1.44795	9.99444	1.96838	94.8333	15.5479	99.9506	46.7835	57.0741	40.4418	65.9375	70.3832	123.156	29.0246	96.4736	41.5165	55.6683	7.02468	87.0089	29.4334	156.973	45.205	62.6838	56.3677	110.485	76.5557	109.76	87.8725	47.0774	27.8091	217.854	32.2083	11.1789	5.43936	78.7196	15.9395	68.8658	54.9751	124.379	39.1693	131.867	30.9611	131.507	58.7227	134.506	28.5348
1552684_a_at	147.458	213.866	92.2905	68.0702	138.639	113.356	92.5873	251.244	145.856	162.161	142.06	169.821	185.452	210.291	165.293	152.524	176.142	164.154	99.2897	132.15	205.566	145.293	177.5	178.177	142.422	159.256	105.214	100.967	161.576	169.402	167.538	214.618	204.135	157.173	202.132	137.813	131.243	169.882	96.9345	185.184	246.282	178.156	140.43	149.362	144.529	150.887	227.329	235.376	131.914
1552685_a_at	69.662	131.582	96.4115	129.19	116.711	83.3447	120.702	118.978	236.543	130.234	58.8921	135.234	51.4503	141.182	35.179	113.65	77.1923	103.949	63.5708	130.624	76.2948	185.558	72.5958	70.6465	117.158	161.01	87.3026	99.8839	106.322	150.022	222.905	107.001	123.301	168.873	116.778	159.625	98.2127	143.687	40.635	168.952	88.6117	76.5436	89.5484	128.504	84.4942	143.232	126.569	164.674	112.969
1552686_at	13.0206	37.9411	31.6754	8.79482	8.75449	9.84357	47.603	65.8525	46.4057	101.234	7.16882	9.43927	6.19428	73.0927	63.744	72.8115	45.5394	10.1211	35.1617	6.91495	92.4551	55.7293	10.4292	42.3572	31.7918	82.175	9.0964	39.4611	25.1507	38.9615	160.311	41.3756	33.2135	69.7912	65.6408	7.78984	9.40902	53.0413	4.03097	52.5731	4.65447	15.9463	36.5904	10.3916	7.66387	9.79274	7.25848	10.8293	90.9581
1552687_a_at	30.8897	107.038	75.929	19.9701	26.4159	6.22985	39.0431	134.911	23.4861	51.8308	33.0474	19.5983	90.3861	42.7737	47.4101	54.4427	9.04273	54.6652	55.1009	95.7683	31.4575	13.3138	66.624	11.8913	8.61007	107.758	76.0796	76.953	44.5204	64.8827	319.194	78.6727	71.2583	96.0778	41.147	11.1565	11.1959	46.2609	51.8888	80.9665	59.6933	113.315	61.4396	83.1322	59.4465	127.094	44.0644	77.6882	6.89847
1552689_at	88.2397	104.415	14.4784	25.6124	16.3041	21.7401	227.438	95.3878	64.154	124.7	13.9457	131.021	24.2444	36.6247	10.8375	90.3093	87.0375	29.4612	103.674	81.2016	14.5672	87.8936	45.5928	40.4287	166.761	202.401	107.159	218.335	26.2388	29.3944	234.953	20.0595	28.8517	21.1728	20.3356	77.5478	18.8496	24.938	14.8939	120.814	86.5946	30.6051	19.9157	96.9415	71.3815	38.0115	20.065	103.605	150.684
1552690_a_at	96.6151	55.7127	58.4875	139.755	79.4709	60.2484	142.656	72.4149	54.4623	67.365	66.4476	77.9343	91.2508	59.1262	118.955	84.1727	68.6139	72.4746	81.8782	43.0355	93.7328	114.746	23.6965	8.07998	71.4074	145.583	40.9336	81.8927	118.719	92.2102	431.448	84.4139	112.848	63.5763	83.5425	81.9017	46.6271	76.4882	54.5546	83.1378	105.383	57.5672	104.882	68.3969	72.447	112.944	78.5435	70.1211	53.0798
1552691_at	88.7907	11.993	222.91	54.8534	166.876	304.676	210.387	1.38986	78.246	24.6212	103.995	35.7321	157.887	62.5042	152.498	83.8063	68.5159	9.88833	115.701	1.68968	156.732	3.09165	173.772	48.063	80.878	68.4142	82.1677	70.7757	207.457	40.6591	379.005	26.8816	48.746	33.2004	99.5456	54.3152	176.602	40.5562	87.6768	4.89871	90.9525	2.2944	105.703	9.49518	109.521	42.7611	172.911	45.4147	85.0839
1552693_at	2.65085	38.2203	51.1828	2.44795	6.38869	1.50551	2.28782	5.38458	1.1032	6.43142	1.20035	3.09496	27.7365	6.13135	10.688	21.0763	1.00025	2.08882	11.8424	2.77826	2.23406	3.4974	3.7652	5.9158	0.695822	4.32254	5.30561	5.87093	9.20266	3.45807	104.092	6.15821	8.768	30.1869	14.0366	20.3178	2.43016	5.51093	1.40612	2.17484	21.8959	20.0919	3.63849	1.73201	13.8891	6.85981	28.829	14.2632	1.45885
1552694_at	69.9119	40.2324	69.2224	89.5562	56.7678	43.9677	52.2937	97.7601	7.80102	54.5855	12.763	63.6862	46.6291	87.9239	47.8153	46.0107	14.6895	45.5079	12.8522	3.39028	45.372	77.6227	48.1705	76.5933	83.8433	51.208	45.9177	16.2179	67.8255	72.1105	133.651	51.806	33.2756	61.7347	36.3561	21.2076	36.4348	22.8915	28.231	15.2026	14.74	28.9538	31.427	28.8278	65.8769	52.8161	32.2334	90.671	102.118
1552695_a_at	186.925	317.212	226.758	353.626	110.825	134.47	147.493	274.421	67.5071	182.635	107.448	150.089	108.056	278.202	137.148	140.982	54.784	111.073	82.0632	89.0601	183	249.206	151.061	245.244	215.17	108.648	136.032	159.787	157.93	197.674	452.787	177.283	112.68	204.426	143.966	195.785	96.3408	142.263	84.1905	90.766	81.4944	107.492	101.521	76.5935	77.6929	199.626	171.962	197.756	254.32
1552696_at	130.651	130.967	42.8546	32.8373	79.4293	48.8103	103.076	77.4704	171.712	87.6715	91.0337	130.959	62.5218	137.98	93.1262	70.7441	99.5842	42.0063	108.378	114.137	78.1489	84.4794	124.304	158.171	94.466	85.5201	70.3056	79.1959	77.7412	43.9856	336.938	71.4691	42.2994	71.6964	84.955	117.789	110.025	155.548	57.9599	63.0287	94.8652	64.1504	125.16	46.475	112.616	78.7036	97.551	75.843	74.7743
1552698_at	36.4284	79.941	72.2007	177.482	182.377	103.897	135.301	163.562	42.4858	108.848	101.02	70.3015	15.0749	185.152	59.1256	120.652	85.102	110.989	107.281	72.0673	95.1859	150.728	117.531	207.493	108.195	196.128	57.7633	123.407	10.4714	126.885	360.457	135.262	98.545	185.507	52.0569	63.7976	74.0156	143.366	101.03	149.897	71.5325	91.5033	86.6816	54.6174	84.9205	56.665	115.066	110.793	100.097
1552701_a_at	1121.5	504.856	1792.77	317.841	1152.13	1330.62	1168.62	295.94	714.228	334.553	691.665	422.372	1508.23	244.176	1766.62	601.567	992.162	399.959	1554.53	320.599	730.78	279.422	1943.18	224.484	1401	489.757	980.359	607.139	1110.8	187.729	2100.13	512.269	977.571	259.111	1560.06	708.789	960.266	302.41	1323.79	296.157	935.178	232.516	1066.8	384.713	1287.77	319.693	1248.26	290.621	1128.41
1552703_s_at	1425.03	399.997	2714.5	349.208	1316.54	1778.82	1462.41	322.99	750.202	402.74	1251.47	302.531	2542.17	259.584	2194.55	415.792	1663.78	463.4	2136.57	430.1	1071.59	258.998	3086.45	325.353	1849.46	560.073	901.535	582.502	2180.47	302.775	801.733	505.013	1610.02	276.775	2664.9	1220.03	1708.5	469.286	1285.27	350.473	1313.42	419.081	1521.23	454.116	1583.46	407.599	2484.88	387.595	1362.31
1552705_at	112.203	113.268	118.113	83.1458	97.8292	133.689	67.5685	108.791	135.887	76.2515	187.517	84.7803	114.047	144.361	157.636	120.857	113.993	104.253	103.996	81.2859	89.3901	44.1082	100.928	144.674	127.012	108.223	124.491	191.231	180.81	91.9309	366.98	71.8914	146.676	132.783	91.059	108.157	112.854	120.014	127.029	132.169	181.007	91.0589	77.2038	62.5889	155.402	141.144	128.336	114.286	111.2
1552708_a_at	7.68471	41.4941	34.9875	54.013	51.658	45.4629	3.22292	67.5483	13.0011	9.538	33.6135	40.0154	19.56	47.8102	18.1279	46.9091	2.06901	1.97001	21.4124	14.0058	30.1819	12.0458	51.678	3.93244	48.6833	3.45684	30.2365	67.976	10.4216	35.5042	325.305	31.126	6.34646	27.2671	32.9918	18.2513	41.2094	45.5317	36.6094	15.2186	53.3302	24.8905	31.686	4.58252	16.5574	3.3009	29.696	20.3103	11.4626
1552711_a_at	820.202	575.893	900.639	954.097	407.005	622.595	497.93	746.087	852.917	759.166	831.607	737.516	679.535	742.153	733.989	857.599	937.541	790.452	1194.63	805.144	645.893	662.904	697.465	757.434	781.188	781.483	751.002	783.659	972.854	757.149	970.051	694.617	836.139	798.391	663.244	956.087	639.037	740.088	953.512	789.863	928.412	699.572	559.441	650.453	659.201	750.456	783.91	785.57	715.779
1552712_a_at	124.862	132.054	30.8321	16.8565	213.928	82.3085	74.7619	56.5808	15.8133	95.6211	131.734	81.298	147.939	79.4726	35.1947	68.1759	92.4176	67.3513	52.8879	12.5423	342.862	105.837	87.3578	53.0056	77.8854	131.617	63.3174	104.131	102.98	52.622	302.981	34.3579	48.5451	104.785	54.3987	86.0145	88.4536	39.3692	63.0899	92.5814	80.6832	115.019	45.491	87.4732	42.971	44.7203	135.38	34.7692	170.819
1552713_a_at	53.4753	168.025	17.7864	118.811	32.3561	60.25	43.8023	116.471	87.827	253.176	59.4363	212.85	53.2736	231.688	7.09612	178.322	45.2871	71.2622	34.857	166.466	60.072	154.649	51.3013	137.926	25.9493	98.3206	56.27	106.288	35.8112	115.258	27.1887	133.139	72.2142	141.239	54.943	82.471	63.6717	111.75	22.6727	181.211	56.1884	135.608	50.6587	92.0998	60.1615	129.853	40.8955	124.631	14.4184
1552714_at	145.544	75.4064	3.54686	16.8406	58.9466	3.52721	79.9038	5.72306	309.501	2.47304	27.7573	24.7613	3.01969	59.1525	6.19736	19.4684	12.2728	22.1306	17.004	2.50369	206.765	12.398	6.06346	23.9083	122.506	45.9041	3.68608	16.7968	7.86902	3.59215	263.584	19.3204	17.0672	7.2868	54.7801	31.9843	50.688	6.4549	58.1513	12.1869	64.2025	12.8814	43.6196	43.7137	124.042	11.5438	31.2473	4.06555	183.604
1552715_a_at	25.6968	72.3618	184.829	134.172	115.926	83.5061	71.5662	49.7505	84.0989	70.0914	62.0697	83.4298	23.6954	56.1525	65.3033	90.0492	98.9866	105.575	98.7221	86.1869	17.5225	187.481	28.8315	161.472	282.029	202.292	173.153	114.745	53.6682	106.18	53.6396	127.889	103.917	145.768	147.194	67.0532	176.979	160.999	75.4183	107.429	40.5972	112.769	78.6977	72.456	99.8075	149.463	160.87	116.236	233.4
1552716_at	223.33	391.132	356.221	441.141	409.446	634.944	403.456	499.07	262.995	520.96	301.332	423.709	420.601	326.586	394.354	503.671	492.362	607.239	404.82	426.376	363.527	434.527	447.975	627.854	779.197	616.778	515.188	434.327	268.579	360.111	728.061	547.617	507.45	836.469	321.078	576.11	445.748	700.871	308.166	653.687	451.966	504.858	398.272	700.672	304.916	473.151	401.579	450.487	598.617
1552717_s_at	160.915	139.422	178.199	96.6612	103.74	152.392	51.2313	142.101	82.6577	18.1681	125.899	67.8701	87.2171	120.708	109.71	98.5137	101.601	66.5064	80.6248	38.1149	139.917	110.626	189.74	89.3538	47.7253	16.5894	51.2225	49.6708	103.376	101.244	134.828	51.1982	176.633	26.259	190.302	80.481	128.291	35.9095	60.8402	72.4994	83.5318	56.5594	77.3063	57.4706	139.013	62.2356	144.28	48.7734	263.604
1552718_at	90.8679	212.117	101.484	243.02	93.4648	124.676	108.34	131.218	67.6537	141.355	96.0794	221.531	58.5329	127.796	119.916	133.447	132.463	186.463	110.765	196.779	93.8456	162.421	94.9189	175.18	108.449	120.076	114.754	154.036	120.715	111.695	97.4587	117.988	70.5401	152.525	134.538	107.187	108.147	79.603	138.553	90.3722	182.924	126.522	87.7799	145.595	82.1881	156.246	51.7069	147.796	133.935
1552719_at	170.701	164.573	193.606	192.811	241.099	209.34	25.5956	179.218	188.412	159.528	294.972	161.91	247.508	253.429	248.786	105.303	168.633	88.9288	168.179	117.813	246.328	203.706	180.026	157.052	142.614	175.199	130.362	209.426	227.056	144.423	394.472	198.766	158.181	132.772	168.828	155.438	150.11	177.943	226.177	194.356	240.503	122.224	187.187	59.9183	180.465	40.1845	221.079	158.903	236.402
1552721_a_at	55.6672	2537.66	262.511	701.173	811.367	1810.74	28.8732	785.335	142	699.71	54.7593	1072.4	95.1239	410.845	84.2619	1512.29	45.1704	802.006	11.922	916.895	58.5331	1562.02	33.2655	1406.11	222.519	1023.37	1247.28	1021	7.034	657.366	199.764	2430.93	141.215	969.514	53.5395	438.86	62.0137	718.855	51.6153	891.228	81.3941	1084.78	38.2006	1297.41	87.2437	1051.36	165.87	1172.41	184.479
1552722_at	1.0999	3.27346	7.47051	49.3186	31.5283	29.6312	19.9881	4.34928	20.3971	14.8684	13.7665	2.9602	3.80237	6.96314	2.43868	17.1794	2.36257	20.992	1.47447	31.8248	3.93379	1.79956	26.2689	1.34215	1.17994	31.5321	16.4657	23.0827	16.5195	0.669529	149.063	19.7647	39.8856	44.7929	12.4936	11.0813	1.42341	0.833209	8.146	7.4405	1.76476	2.74207	0.755662	1.26849	19.7539	5.52878	51.5394	17.5753	29.0443
1552724_at	121.753	66.8526	140.899	164.722	117.835	111.056	181.465	148.858	138.258	93.429	186.844	128.497	199.435	176.686	78.7013	129.809	109.707	121.335	128.48	130.507	165.746	166.111	293.69	150.584	142.227	232.488	144.72	109.069	197.29	140.465	445.175	135.94	214.174	270.111	225.406	152.647	191.775	99.4114	182.756	128.055	233.771	163.833	92.8453	112.454	171.614	114.833	159.69	156.97	307.152
1552725_s_at	66.3966	177.722	87.6605	116.712	122.531	53.6843	112.148	107.349	58.1476	51.6025	66.0772	57.9649	55.4044	82.5108	63.6938	66.7087	49.0489	57.0011	56.723	69.9666	64.6235	108.068	61.8752	96.4453	39.1335	128.914	139.449	75.1987	123.756	61.8693	269.716	113.205	122.238	85.5547	155.738	54.5152	60.4424	38.4443	33.3931	81.8475	23.5423	6.09619	27.6684	78.4964	110.111	96.9518	171.414	61.5951	69.1765
1552726_at	35.0974	84.6927	11.0824	75.6169	9.13411	21.521	10.6513	45.1672	80.484	16.4346	74.144	160.552	20.3835	148.263	62.168	17.9454	22.9791	54.4552	11.8617	87.9821	89.0137	125.893	66.1417	100.253	42.23	190.861	18.0364	18.0549	35.9991	18.4158	148.46	107.546	12.6157	121.22	33.6666	12.4205	8.05967	22.6573	3.78301	163.654	137.635	41.9837	47.5211	72.8247	32.6599	73.6859	18.157	136.494	9.22457
1552727_s_at	88.2461	190.156	68.787	257.665	42.0022	63.1655	55.9575	132.436	115.924	138.403	110.72	310.255	150.756	386.917	173.566	152.908	91.0829	115.2	67.652	298.122	190.666	292.514	136.538	276.904	116.579	389.29	143.843	166.284	70.5802	55.6747	136.961	271.114	152.275	270.719	63.5012	82.6578	88.8903	173.962	95.4525	178.151	293.372	223.692	107.428	152.04	67.7882	164.223	98.3595	212.575	73.2037
1552729_at	134.255	218.319	209.539	259.06	163.188	298.539	115.935	221.481	150.766	169.833	192.814	265.664	250.079	167.175	116.684	108.581	118.32	138.999	177.867	153.123	424.243	281.286	288.686	160.641	281.579	380.354	239.472	233.482	193.799	160.94	421.956	262.882	323.374	334.38	169.75	180.243	157.139	200.341	107.494	187.436	210.597	125.858	255.321	122.583	237.167	171.116	286.805	227.442	252.628
1552730_at	35.3316	56.4854	11.3916	84.9722	52.4202	58.09	17.974	8.68639	19.0308	10.7753	92.6102	21.3874	38.1164	29.8823	35.8004	42.3434	66.3165	38.8073	24.4371	9.33683	40.5502	42.1263	39.561	19.8524	11.6264	48.7758	36.0309	111.254	23.525	10.5625	61.7754	51.2621	103.475	71.2456	31.4241	17.977	31.708	35.4298	63.1906	2.60003	72.5728	5.185	21.5692	36.6427	8.30251	59.0259	58.492	14.4019	17.1314
1552731_at	4.92094	2.88187	7.3526	5.32805	4.52977	1.96931	3.83595	8.16758	7.57709	2.979	1.37918	6.914	5.21767	16.2684	4.87656	2.24226	4.38061	24.5524	1.08552	3.42969	1.89911	20.0973	1.65278	4.48832	9.32512	5.77367	2.24316	4.71941	1.79193	2.60327	68.1941	1.92048	3.9208	7.17229	13.2691	3.74406	4.8789	1.63501	0.684994	2.84004	8.13029	6.00164	2.80303	4.3902	8.62559	9.44462	4.57847	2.49282	8.15381
1552732_at	20.2219	32.0581	44.583	64.1511	41.441	69.2292	43.2303	63.3842	33.8836	43.4997	14.9532	46.4685	19.0425	39.5556	2.44334	18.4274	34.1059	22.3097	8.94099	35.6453	12.6159	52.4506	27.2132	53.6605	34.9943	33.7623	3.24195	73.2694	38.9139	32.6486	117.687	24.8738	31.2186	24.0435	36.9612	44.7724	1.19222	26.9642	10.8568	35.7372	16.3198	1.92153	26.6201	37.1073	21.1927	39.1843	20.1983	46.4588	63.8699
1552733_at	566.96	596.107	366.978	454.146	396.607	643.967	377.053	866.761	373.538	426.515	475.029	445.257	526.964	705.051	441.949	467.739	641.682	762.182	502.208	533.374	644.261	421.715	387.827	662.142	626.347	853.988	544.005	658.516	421.54	540.442	603.173	562.029	755.24	636.079	528.345	621.741	515.865	542.863	420.403	539.089	905.084	630.71	614.689	478.137	519.202	470.728	568.758	726.975	553.993
1552734_at	25.319	98.7115	63.4917	67.2115	44.9269	60.4675	60.9464	111.172	46.2314	43.6716	90.7728	45.1096	59.6019	105.254	64.6977	34.4618	90.4133	17.3971	60.8003	74.4477	56.3569	33.6591	70.7678	77.7873	60.1321	20.6911	39.4232	91.3057	64.1038	50.8717	359.132	48.7674	44.1719	92.3866	59.0365	52.2883	83.1367	43.3537	50.4821	34.0535	87.8318	59.1703	62.9459	27.1679	97.1807	56.5546	59.2432	41.4606	68.9277
1552735_at	299.161	220.34	205.815	177.716	334.2	488.414	2144.75	210.362	63.7043	189.418	2192.74	167.788	268.294	312.733	1375.69	164.763	349.462	157.879	221.632	132.243	327.24	187.136	175.6	156.423	468.833	326.76	339.164	337.327	69.7381	139.993	692.394	244.398	429.283	208.235	855.074	288.212	582.342	259.711	156.534	244.528	349.447	233.95	161.462	189.583	175.788	153.45	244.225	274.037	546.766
1552736_a_at	124.158	6.28167	5.80694	29.7153	64.4382	47.2117	67.5077	13.4672	69.9818	30.0711	152.316	2.86766	7.68888	2.05052	30.1771	9.61189	28.0512	29.2866	128.413	11.5468	91.6557	5.87771	20.7377	7.41578	28.9397	37.6232	31.4781	24.2918	40.6637	7.96279	211.428	6.93178	8.15945	3.96617	7.92567	7.47458	119.478	7.79881	48.3086	37.0353	64.172	13.6889	110.588	54.8533	46.6269	45.9511	119.35	44.3279	26.5007
1552737_s_at	52.8841	166.667	112.876	44.0987	89.3272	124.238	74.0768	179.694	243.592	127.922	141.65	147.872	126.3	105.429	196.492	94.2661	128.344	90.3408	64.7555	144.075	101.742	137.088	129.138	121.396	53.2965	98.2871	89.1153	49.7221	90.774	83.6154	196.747	13.0643	89.8855	40.2394	103.921	135.642	79.048	45.0037	93.0998	75.3414	20.9974	65.7797	54.9763	38.9249	62.0969	27.379	113.933	108.286	3.29719
1552738_a_at	173.214	239.575	94.1995	127.235	207.56	231.296	264.371	191.58	168.546	111.348	124.018	115.304	97.8774	116.69	214.057	222.466	167.043	257.431	113.402	125.988	93.8524	78.1172	130.62	64.6947	115.412	149.359	230.252	153.868	98.8757	78.8713	286.714	141.576	100.02	118.052	166.482	133.293	81.0699	150.964	94.0765	124.054	168.877	167.445	213.431	125.825	154.343	72.3619	137.285	78.9001	129.206
1552739_s_at	380.487	368.113	138.168	50.6407	251.567	226.83	333.191	311.514	253.947	226.058	193.552	179.044	239.505	148.981	325.983	234.461	274.114	305.392	257.909	292.388	152.852	181.245	221.708	192.612	244.981	192.668	351.265	228.219	145.329	173.839	362.192	211.836	248.994	175.953	238.3	311.118	182.219	167.936	221.251	198.825	317.067	227.47	370.785	272.03	169.926	215.631	205.516	191.078	148.728
1552740_at	6.14949	243.958	119.551	160.702	90.6791	21.0903	6.1735	237.537	157.486	35.1608	17.1106	81.2051	84.8142	83.2823	92.5492	126.227	33.0643	69.3859	5.81253	166.316	17.0618	105.7	53.3555	107.913	49.9965	52.5953	94.5237	126.491	38.8318	111.501	271.514	14.3055	6.9079	108.129	15.2796	79.2984	5.43892	93.1117	9.55366	102.022	102.156	80.2901	12.3252	66.6158	4.89599	121.418	73.6199	93.308	101.233
1552742_at	49.9936	52.7841	1.61353	41.5106	30.2167	44.9617	3.46969	23.3703	9.95618	61.8782	59.5469	12.2187	24.5119	23.5327	24.5668	29.1513	27.0296	15.0471	4.99637	22.7473	32.4071	20.6016	2.23589	78.5366	21.6052	48.372	39.2282	4.17957	14.5828	24.7095	105.192	23.3294	52.592	8.82984	22.7157	12.806	14.7565	22.7817	3.7169	6.82242	20.0776	20.7379	14.8679	23.6085	30.6937	61.5661	13.2622	28.9418	4.80627
1552743_at	8.58433	15.804	8.00004	20.4416	15.4524	74.095	15.2199	28.363	27.9728	48.9033	7.57414	15.4448	11.278	88.4705	21.5092	16.5207	32.0646	13.7371	41.0073	17.7353	15.7376	15.6244	48.5827	12.7702	32.807	22.419	23.0094	19.7661	5.88917	21.5771	429.437	20.1499	44.1358	16.0586	17.1043	15.3015	11.0717	20.6866	3.45299	21.48	22.9351	29.3356	49.1386	69.121	10.9259	35.3038	58.6639	62.8079	71.4492
1552745_at	3.93759	5.25702	6.50629	89.822	88.495	28.5365	65.449	36.4684	23.937	69.398	9.25196	44.0692	23.7325	90.8835	2.50832	51.1832	16.855	38.6895	21.8336	68.0124	7.92731	12.1342	4.98654	78.6184	20.1036	26.0852	18.9733	6.37071	32.0486	11.7821	36.0807	2.46641	10.1706	11.3421	4.97285	1.29879	10.2214	41.5444	28.8609	13.8948	2.8004	58.9179	2.55507	2.16838	35.8487	3.21488	12.9847	2.25948	79.3
1552747_a_at	8.8612	32.5919	17.42	5.7278	38.6283	11.9584	98.6936	37.0125	10.0086	8.00456	33.8983	14.5172	10.7981	54.605	1.43694	12.2155	7.37519	22.9133	54.3424	6.01846	20.6263	54.081	23.1377	30.1974	2.79388	14.1207	21.087	35.3453	21.3615	22.048	33.7709	10.6067	46.6146	13.9069	14.2617	21.4221	15.9882	38.0725	16.4049	29.6187	24.316	16.7326	2.29074	27.5719	7.24916	30.8181	27.7351	41.3999	83.3139
1552749_a_at	43.2859	122.822	101.496	209.513	34.5232	157.145	41.6276	231.446	33.3989	95.4996	40.8481	261.544	107.844	69.7518	31.9331	45.2451	148.121	161.491	16.5916	43.2141	80.5799	131.426	138.851	57.1588	32.7514	283.106	48.9111	195.388	79.2502	339.247	43.8221	394.12	133.138	178.33	38.6665	83.8753	30.3089	28.7166	18.3508	303.977	69.4999	247.472	16.3343	144.217	48.0787	163.872	25.9796	50.3774	73.2883
1552750_at	34.408	33.482	3.62916	62.5245	4.45877	14.9321	16.8381	30.8438	1.56793	13.7286	4.07288	14.5958	11.8165	3.89864	9.74893	6.23472	5.70962	2.98967	2.50687	9.57358	5.31384	39.3404	3.52601	53.7244	14.4526	46.0724	11.3748	51.3556	2.84801	5.80429	169.979	25.5243	4.99273	16.1549	21.7171	1.77451	23.1325	14.4313	1.12967	3.88584	21.7524	2.68685	1.36615	1.94621	7.80735	14.7956	11.1997	15.2888	25.8878
1552751_a_at	85.5885	198.926	16.2652	112.142	62.7418	24.1612	56.8585	181.87	55.7384	71.8528	75.3314	82.0372	95.1086	47.842	74.1887	60.2038	78.509	25.8493	92.1013	89.2028	44.8355	153.291	57.0063	129.834	25.8373	212.9	69.3579	146.252	81.4653	80.9953	428.024	51.7084	125.065	127.705	71.39	122.662	45.4372	66.0685	12.1495	90.4935	112.452	116.275	38.8097	18.0793	75.1265	68.285	52.9742	95.5838	142.015
1552752_a_at	33.8885	68.1326	64.6492	106.424	13.2622	29.2569	41.0766	126.101	63.0985	58.1877	58.4531	118.508	59.8925	66.5838	64.5505	48.8623	34.3661	101.631	36.3193	44.9841	60.8223	99.1727	1.484	100.368	82.5947	84.6953	85.3474	90.6258	56.7959	56.6621	128.968	74.8654	52.3383	105.883	33.1183	38.3091	46.2548	49.8559	36.7225	44.9637	27.0353	60.8373	13.2616	67.7806	5.6946	120.778	56.5574	67.2334	51.5556
1552754_a_at	2.72493	36.1248	3.00034	31.4547	7.51133	5.40917	1.95793	52.3159	8.7365	36.8516	33.7254	50.2587	1.7593	27.5066	2.9813	26.0588	2.16616	3.25317	6.87551	3.99101	13.7021	4.60063	3.91722	41.3926	51.5498	46.8276	26.9456	36.7113	1.19134	2.98626	366.5	11.6688	3.46628	17.4954	2.56636	1.27087	2.86033	4.0654	26.3913	25.7543	3.50959	35.0821	1.59217	23.8412	11.8467	31.1295	1.51822	31.2338	19.0619
1552755_at	2344.17	1168.48	442.276	4453.34	229.651	246.112	495.3	3032.87	416.233	2943.9	1625.97	2502.53	340.932	1396.36	364.862	5547.7	1534.08	4608.3	827.488	2460.41	1044.74	3173.57	838.441	6840.29	841.722	4254.46	1900.04	1779.66	520.45	3057.7	336.436	1916.24	1552.41	6457.38	1477.4	599.135	1374.68	2579.35	861.726	4659.22	699.132	4045.77	1078.64	4114.28	1057.79	6048.79	451.085	4018.54	438.788
1552757_s_at	758.159	263.997	163.411	921.478	9.90379	39.5303	58.2237	570.502	51.314	974.006	387.777	560.947	104.138	280.689	128.742	1316.16	402.186	1608.69	311.733	656.363	185.327	765.98	267.918	1296.91	188.625	886.769	478.888	379.99	127.172	898.969	274.694	635.851	553.451	1640.65	285.291	173.308	374.157	660.085	235.859	979.059	165.736	965.168	279.688	1577.29	137.408	778.804	115.533	1139.43	77.8556
1552758_at	20.3769	94.4848	18.8588	70.6688	88.0262	48.1292	5.98411	78.3827	44.9677	14.0256	8.99748	37.3993	13.4205	66.7974	39.6669	37.8523	40.3511	75.6085	12.1915	11.5925	42.8302	60.1997	39.6982	49.0164	12.3255	110.765	46.4089	36.631	12.7079	45.7134	289.642	5.27504	80.8492	20.7498	45.8867	23.9609	37.4011	13.7798	4.48036	13.7192	26.8294	55.0714	11.1602	57.4302	38.2628	71.5655	4.9563	8.541	49.573
1552760_at	5.13681	44.5025	34.6764	25.1022	91.8445	58.8817	51.3657	3.25419	10.0168	2.52492	27.6689	13.3772	27.4429	20.1103	14.3336	26.8093	45.5746	1.94325	3.66406	20.0247	29.6715	3.15293	45.775	3.88851	14.7639	64.5869	17.7388	7.74283	31.5891	17.8643	156.023	1.82363	18.8214	21.4418	24.5185	26.1408	27.6151	35.522	35.7815	4.06407	46.3317	1.50679	24.2252	1.16611	22.1572	4.54951	33.6386	6.6317	18.7009
1552761_at	192.8	283.663	150.889	253.494	33.9798	38.9421	201.607	388.358	127.299	214.439	137.109	194.384	92.1544	168.248	159.11	177.128	60.5106	50.6613	81.4003	100.858	128.611	81.1941	163.592	294.586	112.469	27.6668	154.689	140.241	107.34	129.386	158.995	96.5717	35.6801	177.913	111.87	156.214	94.1713	155.585	34.1745	83.7308	205.062	134.564	17.5908	117.701	124.83	161.93	91.0614	264.053	138.108
1552763_at	20.9152	2.3881	18.6614	28.7587	10.718	23.8666	41.3053	31.5863	4.96712	2.51497	12.263	2.01964	23.2471	5.0739	22.4566	2.76855	25.7739	1.14589	3.03379	13.6311	0.739683	2.39191	42.0107	3.07619	22.2333	5.68006	24.8651	3.80433	26.759	3.17913	44.0258	22.5685	2.10576	14.8148	20.3103	10.4305	4.04536	15.4583	22.6736	16.4391	40.8381	10.9501	27.3887	1.3413	2.92312	2.29705	22.2874	1.04162	1.17138
1552765_x_at	3.52988	50.6453	31.1225	55.2137	70.2054	53.7618	68.2522	35.9816	40.3692	18.0751	58.6232	50.6258	36.8426	30.4537	73.7176	41.5427	64.7532	56.0252	23.1544	6.2166	7.95263	32.1913	13.9515	29.6676	24.7297	84.7005	33.8155	59.1636	70.9797	21.3661	95.1729	5.86823	5.16482	82.2367	64.8857	13.503	56.0465	5.34483	52.2678	56.3183	75.6781	36.6076	17.385	2.34125	44.1238	3.64629	22.1435	92.7897	87.1026
1552766_at	2.07147	553.149	29.2137	225.154	47.5553	21.6969	1.04085	757.25	25.4448	194.181	0.967923	427.927	17.302	299.948	1.98101	237.576	19.2355	151.265	13.1882	337.996	48.0077	435.114	29.6056	376.734	21.9987	364.29	109.388	257.872	1.11037	161.028	196.061	348.304	9.80983	273.634	0.678797	163.466	16.1245	241.444	22.7022	376.908	1.29588	77.7185	2.31829	163.692	1.16263	71.9131	1.75646	335.529	20.9506
1552767_a_at	37.7311	4123.56	17.492	1191.63	254.752	351.805	24.6202	4699.58	30.2239	1515.28	19.5876	3310.12	31.7586	2129.15	0.983276	1741.6	21.6293	1259.67	38.7834	3419.2	52.2547	1717.88	2.02644	2288.64	326.975	3976.07	1078.33	2972.39	20.6843	1352.33	405.061	3323.45	32.0192	1731.99	10.8134	1255.12	24.7739	2036.79	7.67088	3258.22	51.5236	1192.65	27.6313	1509.8	31.585	1116.23	45.8698	2575.14	119.502
1552768_at	68.6915	162.515	10.8572	185.73	168.622	13.9063	23.7716	26.3087	13.7717	78.2758	16.3796	89.3461	20.8994	68.8808	41.1296	112.639	90.206	132.23	9.75511	29.1836	21.8429	142.572	127.719	210.402	12.0336	149.251	83.0124	31.2067	19.8719	65.3908	338.43	17.5038	16.0385	189.199	28.8029	15.3877	6.62518	23.3663	52.6038	23.5202	20.4035	156.45	33.5982	115.927	16.2402	16.6673	20.145	27.7423	6.04673
1552769_at	103.384	170.971	86.5792	136.288	9.93048	24.6259	38.0999	83.1586	37.1677	85.919	56.5323	100.931	66.1572	75.2003	90.5732	66.9805	77.0382	103.856	38.653	109.733	70.7641	86.2503	70.2504	96.747	54.5978	85.59	86.5241	98.6527	73.0885	61.0193	204.498	11.5036	92.3392	141.024	86.853	63.6939	68.284	99.3683	54.4865	61.6138	56.7354	66.044	97.9465	97.0131	55.8238	85.9056	65.0083	108.84	107.669
1552770_s_at	123.16	279.269	140.259	390.376	174.055	104.989	78.9067	178.903	33.5073	209.255	98.8309	292.802	149.402	340.875	199.613	184.958	127.169	290.419	91.3383	226.085	110.368	172.611	160.832	314.195	97.8228	418.683	201.844	271.255	154.034	151.305	109.124	232.404	260.248	350.142	119.091	92.9409	96.5657	148.117	76.856	312.315	248.111	144.828	175.649	181.237	111.887	195.391	193.182	274.829	222.096
1552771_a_at	26.6356	2.64526	11.9123	5.1662	9.4897	6.21198	3.89708	6.32719	1.71245	8.71377	7.16015	21.4449	4.96226	1.6892	3.14525	1.06821	1.16793	20.7399	6.52243	2.06043	5.09945	3.24248	2.76911	3.38342	4.71146	2.26788	4.20401	4.6257	1.63782	3.16777	28.9976	4.77479	5.05165	3.15991	1.55812	1.6881	1.29536	5.08251	1.84287	18.2939	16.0141	7.21464	1.98745	2.00895	4.01832	1.96715	6.34673	38.48	56.1401
1552772_at	46.4755	40.1339	77.9382	5.58032	90.3962	33.4128	6.71819	43.1927	90.1628	31.8847	60.1824	51.5074	47.7866	51.5475	60.651	10.1775	57.7624	58.3955	42.3083	14.8446	18.3305	55.8156	64.8296	61.4395	65.3482	89.4094	64.0279	14.3417	45.2819	28.7706	362.319	22.1186	28.8482	74.3454	32.4073	123.035	62.032	24.0983	23.0098	29.045	36.6716	36.8964	45.786	29.3701	132.508	43.9702	10.0511	54.26	14.1946
1552773_at	76.5038	50.0945	43.3731	11.2617	50.8443	56.6887	20.4619	121.509	80.0099	15.7539	55.9046	89.4424	93.438	38.2284	60.3722	80.832	33.6646	93.1559	74.6361	49.8942	43.4958	61.1083	76.2135	31.0435	56.7888	68.8253	67.8849	63.86	63.548	44.4912	248.018	32.1722	100.453	67.5641	84.9509	105.922	68.6925	19.9874	68.411	81.6458	21.2401	4.48946	32.8904	51.0577	54.9008	77.2903	99.2396	117.466	70.8252
1552774_a_at	150.046	249.435	86.6018	173.564	181.522	265.995	65.3789	236.526	116.086	176.887	116.206	175.704	231.376	238.585	162.028	195.447	182.262	203.792	102.596	157.23	266.88	162.591	154.036	165.282	190.517	209.653	169.181	148.879	155.416	161.939	904.742	240.712	230.612	219.631	169.692	267.096	121.306	245.918	88.8609	261.764	198.64	254.22	169.549	187.782	129.937	198.19	288.762	236.108	210.06
1552775_at	12.0312	14.6159	11.1077	16.9151	95.1909	11.4595	9.79649	14.284	8.71736	37.1789	9.71497	13.1943	55.9988	7.34712	10.6597	10.4922	30.9282	16.2309	4.54506	9.31518	39.4136	44.2722	53.4355	20.1902	30.5895	125.407	10.324	7.37286	7.54636	7.45859	398.684	8.88894	17.8852	19.9472	43.3201	10.2727	10.0827	33.6129	5.57652	7.88062	14.0271	7.86945	13.498	95.7308	70.5062	15.7018	61.625	5.45944	9.02251
1552777_a_at	16.4534	39.4829	23.3299	24.8259	10.2504	95.9523	37.3323	61.2015	9.61695	10.5324	5.29759	15.2228	57.7049	19.3298	72.6268	82.1389	45.2551	18.6015	25.5493	45.8166	16.9724	27.8844	18.2172	62.5394	56.6726	17.1491	114.791	17.6145	62.6069	15.4268	253.78	89.9374	7.59258	89.5622	12.2482	8.34958	21.0013	22.9437	19.4182	100.71	42.4145	23.5989	27.0556	29.1185	4.0123	79.308	43.7735	76.6512	60.3864
1552779_a_at	25.7754	54.5014	134.847	92.7735	37.8964	22.6554	42.4512	37.8776	3.96991	57.9586	11.9063	14.7713	11.6646	81.2289	14.0378	48.5098	20.2779	55.6323	89.5063	1.63862	238.939	89.5456	24.7492	65.6886	33.4999	74.3275	10.404	122.392	45.0393	63.5002	151.272	77.4275	5.67704	43.1773	20.0718	43.8177	21.5611	29.0776	89.9975	83.3263	94.2505	59.4554	130.409	25.1708	18.5009	71.7698	28.9616	54.7692	223.169
1552782_at	33.5899	89.6608	382.929	142.093	64.2434	50.2857	52.8961	46.5741	39.1522	70.331	47.2287	41.9164	39.8851	97.8482	9.19121	111.282	32.5211	53.9146	108.442	19.3382	330.936	102.612	51.7513	7.04217	1.98697	78.2181	90.4492	110.107	26.761	56.6471	148.049	55.6301	31.9213	34.3752	17.2717	70.9868	22.3721	62.3482	316.941	135.296	307.285	74.9084	326.618	57.1731	14.2902	85.5909	32.9929	31.78	497.06
1552783_at	5.03858	68.9708	36.581	27.418	33.2512	35.6899	35.2812	49.66	26.0876	31.468	53.2723	47.5864	33.1533	42.3639	43.159	36.611	49.8543	39.1981	49.7852	4.84251	58.7958	28.744	7.11547	25.0819	10.5581	57.9149	54.2587	49.8203	33.4243	16.8344	162.416	31.3147	68.6107	26.5398	61.6569	44.3164	29.7047	2.7865	40.654	17.6695	54.5301	2.2231	31.972	17.4956	38.8508	6.35057	44.472	15.3025	5.80563
1552785_at	164.204	175.184	90.4969	163.485	131.852	158.558	32.2129	86.9811	56.5279	75.8563	93.3681	100.847	170.059	47.2659	67.4477	92.0104	110.154	43.2588	164.222	103.014	107.176	77.4634	108.239	46.4907	129.154	60.3971	90.4594	45.1494	84.7477	49.8594	71.9376	105.908	148.796	123.044	138.643	131.132	151.457	77.6941	136.96	113.525	121.673	79.6043	71.8958	59.9738	32.3775	62.1012	204.411	141.047	60.9457
1552787_at	71.4475	130.769	379.342	86.1592	127.271	253.865	210.938	98.2545	148.07	102.161	133.636	133.336	152.726	86.1521	95.9983	72.3028	66.2452	68.4247	87.9434	135.778	165.286	159.346	390.82	163.215	121.499	65.7553	158.889	166.5	198.355	149.486	191.318	144.727	144.999	298.678	141.191	133.472	157.611	200.863	131.738	125.786	202.769	193.055	84.0599	64.6207	114.368	115.042	118.184	102.358	112.102
1552788_a_at	79.1427	36.6386	213.406	159.015	149.627	169.3	92.5949	107.239	125.676	87.1269	109.031	110.78	102.959	110.804	91.9679	58.0415	46.0511	81.4389	60.992	24.7153	113.043	99.6469	282.848	127.645	107.136	75.5812	57.9207	95.0319	144.464	117.924	307.235	136.504	111.607	167.516	70.203	107.045	108.504	185.111	122.573	53.3369	108.574	185.887	110.589	13.4466	135.526	93.1548	148.311	100.444	153.083
1552789_at	512.748	505.116	755.674	335.76	497.041	456.682	582.095	620.647	380.214	504.511	540.899	436.569	664.524	785.501	511.549	630.651	610.962	539.096	612.273	512.822	631.369	252.212	433.055	502.248	577.811	340.644	220.973	197.408	690.372	608.171	412.574	538.298	549.369	364.154	564.136	597.606	634.533	462.747	705.649	587.914	391.869	513.189	478.46	559.625	548.316	472.161	819.042	347.546	214.794
1552790_a_at	1213.61	1082.42	1015.88	1324.59	1071.71	950.338	952.723	1464.57	666.241	1207.07	1039.59	1157.22	1215.95	1603.77	1052.38	1702.66	1132.28	1251.4	1156.84	1275.93	1107.25	1096.65	711.079	1224.27	1143.93	1394.52	1293.68	1222.85	1244.42	1754.19	185.713	1610.11	1166.09	1211.17	920.502	1081.22	1336.89	1933.01	1555.31	1638.99	946.361	1263.88	1098.8	1525.66	1391.36	1497.34	1208.32	1513.74	665.641
1552791_a_at	18.8824	19.9227	39.3989	14.612	3.80595	21.7868	6.13284	29.2361	26.2094	48.2718	17.3784	23.9876	14.4133	25.7347	22.1504	1.34952	20.7514	16.9303	23.9744	39.611	24.918	7.67468	17.3615	10.8654	2.11928	45.9829	1.74986	19.0565	32.9334	34.8576	107.714	31.7014	20.2711	42.5054	58.8764	37.7968	27.0115	14.5748	26.1119	39.3828	27.5309	1.73391	24.028	28.6495	47.7555	14.0119	28.6091	2.30458	24.286
1552792_at	111.14	117.161	38.3347	8.3834	72.0613	52.736	3.12774	89.8908	92.9125	68.9311	34.1148	4.88309	12.1537	56.5039	27.6453	53.0567	32.0851	54.4647	60.6233	64.3739	13.6095	25.4321	43.3535	55.774	42.6053	50.7821	59.1401	20.4637	3.35449	27.1865	80.925	112.938	43.3239	17.7653	45.1609	50.7481	51.6552	39.1091	22.5927	52.0618	65.7262	2.29361	92.4514	58.4622	45.602	2.91952	52.0799	21.1865	27.4977
1552793_at	11.3998	28.0133	121.725	96.5445	137.239	143.135	37.0632	16.3931	59.0066	16.7313	19.3438	27.1535	41.2673	185.76	95.1743	120.473	29.2161	56.3932	11.748	74.6734	135.127	23.0914	47.0924	66.553	227.927	23.0879	235.686	134.533	236.108	16.4099	177.496	32.1499	56.4596	17.4845	66.4378	88.6112	83.9204	145	112.746	56.9243	109.056	22.756	92.5066	58.6324	80.9933	51.5334	145.19	99.5338	124.016
1552794_a_at	46.1248	75.9664	95.5829	99.3568	102.315	76.3549	61.1562	144.411	126.985	54.6642	31.9	102.828	110.213	115.275	67.0402	77.7123	117.333	38.9934	143.218	117.096	71.1847	91.0009	122.97	70.288	143.958	56.0249	75.8017	90.9811	100.147	84.4664	172.515	107.585	115.375	89.5926	53.4208	76.3742	51.4819	65.2656	140.588	47.1402	128.423	111.26	58.9755	61.4936	17.3804	47.0237	117.154	119.035	65.2183
1552796_a_at	31.9838	181.983	50.9127	146.965	48.34	107.998	117.161	274.98	37.9154	72.8711	3.06171	127.539	39.1819	334.998	33.1006	98.573	74.2175	101.925	45.8165	100.039	69.2177	138.255	1.74712	105.074	38.297	99.7862	47.3732	124.763	56.8932	92.2522	631.66	125.574	77.1055	158.119	43.8303	117.269	11.5727	104.999	35.8183	87.42	5.31404	68.9804	38.9241	37.0429	57.6516	71.1056	89.9472	142.526	68.1802
1552797_s_at	43.5819	4120.41	141.483	1766.13	1654.95	932.351	344.55	4625.02	758.431	1415.61	61.1763	2911.77	53.0018	4730.52	49.0047	1865.81	31.8232	1351.43	67.1462	3603.89	19.9575	1513.92	54.7268	1933.5	367.742	3139.82	2190.12	4086.72	89.2586	1824.84	3041.82	2869.67	51.8261	1690.74	57.5234	1463.67	91.2247	3022.58	63.4109	3112.41	107.476	1584.89	65.2509	1389.13	42.3557	1335.24	75.9249	2547.6	67.1788
1552798_a_at	212.897	146.367	229.69	76.3397	238.896	165.25	13.7737	42.0267	93.9344	15.0457	160.078	40.7296	198.936	53.7799	153.028	111.3	166.322	26.6571	229.669	96.0947	217.609	130.989	245.324	46.786	128.439	68.8784	156.204	110.784	346.196	93.1727	348.115	121.644	188.319	60.8715	259.868	123.409	235.09	43.6482	197.492	72.6395	162.781	84.211	182.393	16.9399	179.966	29.1733	232.658	61.3332	216.127
1552799_at	15.6943	14.0113	7.13746	9.55066	11.3269	5.64794	12.9716	9.71401	7.55294	18.0372	14.6474	24.1779	27.022	9.2715	6.17868	6.15812	8.71366	19.2014	15.8232	43.2441	28.1195	26.3987	11.9633	17.9097	12.4191	11.2366	4.92426	10.5173	57.0022	4.94518	45.5166	31.7944	30.0524	27.0441	3.57711	13.9488	17.1352	4.56004	23.9794	29.3198	42.7457	12.293	16.075	20.1964	8.12101	4.00034	14.5601	9.69216	3.47758
1552800_at	150.481	20.0952	108.049	35.9869	134.892	107.086	36.4679	36.4148	122.097	15.699	29.6741	17.9933	268.066	172.24	103.586	17.169	60.7571	23.6882	37.4874	30.1098	87.2093	76.4164	36.2399	36.9	60.8186	16.201	80.1162	169.941	115.108	81.6241	713.573	150.254	169.239	29.3912	80.4334	148.128	172.311	30.3849	29.4205	28.1568	167.865	51.2508	4.57342	18.0223	32.1485	19.027	194.043	81.2878	148.722
1552801_at	44.8553	45.131	4.40691	33.9088	4.26331	48.2868	52.9626	61.1417	117.967	40.6585	50.2457	43.6578	15.2028	60.6264	20.2405	42.2068	41.7736	34.8976	2.98799	7.80775	18.6566	85.7126	6.41355	50.9363	47.5667	40.6492	11.4633	13.7523	4.64914	34.7239	85.8137	11.1284	72.469	40.4953	19.1736	30.7791	41.0625	18.1075	5.02401	44.2781	8.43775	32.7448	5.3286	49.2058	5.55954	60.8096	6.16396	25.5967	21.5485
1552803_a_at	2.1238	56.3373	9.47957	5.10114	10.1106	13.6286	65.9964	5.36022	6.13926	11.2771	4.5997	10.4011	6.64356	10.8469	62.8301	39.1034	3.1452	11.8989	26.0343	22.7651	8.74969	38.5737	26.1817	12.9291	6.64973	10.1338	26.9798	15.0843	14.7462	12.3458	205.987	6.01193	9.0758	19.1555	7.44772	7.0323	4.62161	8.21332	66.6061	6.04787	28.0282	23.4526	19.5784	67.7271	13.553	64.1992	5.4919	10.5755	7.45998
1552804_a_at	104.954	13.3909	107.73	101.664	39.3378	129.093	81.2698	107.555	108.603	151.238	165.424	60.0229	185.75	140.286	178.596	80.612	101.524	55.554	55.6619	104.001	165.066	111.944	167.38	116.909	106.92	14.1726	24.9816	20.3167	69.6483	83.1834	75.8342	34.5919	187.678	208.98	98.6562	72.18	81.1248	123.368	82.0786	90.838	81.4065	68.1245	129.573	117.387	49.0969	84.609	183.297	126.635	126.953
1552806_a_at	102.772	19.0938	162.952	24.7036	11.8972	175.952	126.182	12.821	94.7242	9.64629	110.409	50.0885	131.241	6.33955	65.8943	40.8189	100.164	70.0434	58.0323	10.7969	91.8667	13.353	231.577	15.8341	38.3233	61.058	20.1689	36.7736	127.669	10.8665	107.78	9.9543	106.621	31.5269	48.358	6.21767	157.865	24.6695	43.8264	10.3765	36.6226	71.5302	46.6314	103.152	84.1526	11.4241	103.008	2.96673	105.838
1552807_a_at	528.489	107.029	932.243	230.454	240.225	523.041	498.992	67.406	315.313	92.629	440.628	250.273	766.852	75.8071	402.649	99.4266	489.813	167.305	499.356	111.597	391.538	106.045	815.569	63.1264	259.57	162.18	345.477	140.786	839.821	174.203	244.396	156.124	266.811	70.397	552.04	178.992	1500.91	273.938	885.307	128.393	367.053	24.0531	598.774	95.4246	848.709	34.9166	590.969	117.019	311.11
1552808_at	1.01254	63.5309	7.32977	34.0106	35.5658	53.2134	8.6189	9.35621	36.9873	45.7358	16.0497	24.0071	17.8829	34.7893	15.4909	35.1595	22.5365	16.3502	2.53177	34.5159	1.94412	41.2118	42.4444	28.9782	9.02532	6.81939	6.35314	6.43995	29.1612	10.3648	160.074	8.5293	38.747	27.0577	29.0545	32.7157	0.996701	18.6793	12.4145	19.1042	5.23525	2.04433	34.7334	35.0557	37.035	15.0151	15.4289	1.25891	5.96134
1552809_at	53.9274	61.2732	47.809	79.3638	7.62471	53.2294	63.5115	92.7562	48.9539	53.0029	60.077	26.4247	91.4241	7.06586	73.6826	23.7486	60.4462	88.5305	17.7633	6.78681	19.2752	5.59283	10.6968	50.4869	17.1586	58.1508	34.9853	23.9921	47.083	38.4935	169.451	7.32233	87.2435	33.0223	25.1192	7.74438	50.6542	21.1002	5.42201	29.5689	50.6829	30.6114	69.7116	3.27918	53.596	69.0639	84.3667	43.6166	102.564
1552811_at	134.885	30.9453	26.757	113.969	25.4257	12.0401	431.42	33.4413	113.416	41.694	26.0916	24.1422	30.7816	61.9029	13.7507	80.7926	41.5484	14.1448	61.9747	38.347	29.1053	143.302	22.2149	49.4182	108.862	150.92	49.9077	56.4279	41.5053	48.4127	39.4941	45.469	15.5844	57.7898	173.617	84.246	25.6281	30.4946	13.7592	146.911	116.841	35.2387	74.0885	22.1827	29.135	44.3298	56.9405	30.1643	33.8143
1552812_a_at	94.3321	83.0655	181.136	22.5219	116.263	16.2684	119.967	93.3427	90.2873	42.0112	73.0481	70.6727	58.3744	118.13	57.6005	88.4672	98.4425	34.7595	118.167	38.0249	98.0367	48.2171	121.627	98.3881	58.9497	54.6712	44.0242	16.9923	133.404	63.0074	236.389	11.8225	140.042	51.6753	121.973	86.6474	99.0978	63.2273	90.3392	49.7844	51.6495	32.8158	105.761	7.9179	86.504	14.4517	122.582	48.9201	74.5348
1552813_at	6.14962	10.7581	4.83357	63.97	55.529	29.1	5.10706	22.4064	10.4014	74.5775	6.73942	12.2401	13.1768	13.8792	13.2021	5.38319	6.03794	15.3841	7.22652	11.9096	5.59969	130.32	16.2427	20.6593	14.6992	92.5802	28.7414	6.51444	8.53476	6.43543	65.5636	5.13465	5.23924	21.8356	5.35763	4.74148	8.13823	8.29969	6.09785	79.0031	40.5822	3.93797	65.7486	9.62613	6.35664	7.11096	9.45975	14.3722	51.7541
1552814_a_at	28.9239	9.20147	4.11754	8.86912	7.14609	9.52103	51.8475	10.1507	3.55482	9.37017	14.7118	5.17974	23.4171	9.37674	4.76359	4.02355	9.81852	5.09122	5.06984	3.14539	11.4817	15.5733	17.0518	7.45538	7.66282	9.28341	2.5328	2.2229	8.64582	4.18186	27.2876	67.4967	6.05849	5.69449	28.7141	7.68795	7.93455	17.2796	2.66666	3.07877	4.85109	5.85128	4.37505	4.34297	1.99191	22.9489	10.7916	10.2403	68.4731
1552816_at	113.569	64.7398	114.32	61.5275	49.6438	70.8165	104.844	94.0202	3.56648	40.7399	125.122	64.0761	122.672	22.8589	70.628	141.2	116.12	134.649	86.7975	79.2088	157.145	56.013	128.542	92.5463	172.839	131.327	70.7845	57.9755	63.0305	69.9505	326.723	49.6442	180.692	51.1553	323.133	166.337	136.518	70.832	66.4443	56.4305	88.6211	150.728	168.608	142.488	56.7672	68.3865	144.95	74.5184	126.715
1552818_a_at	4.36028	25.6784	1.2998	5.70629	6.99824	2.64392	4.89487	3.51587	3.71583	6.7609	13.2751	1.17908	1.43036	2.62864	2.47001	23.932	4.58541	6.0369	1.65221	4.52687	6.58614	39.4715	4.16646	6.74048	1.64499	26.2638	32.1253	3.22369	4.16326	7.74012	36.3735	6.2992	9.35911	35.5453	5.62892	4.57	3.6502	25.2326	1.36169	2.01534	1.37876	18.71	1.94827	35.0761	2.25079	5.89088	37.4828	1.67568	3.82477
1552819_at	54.921	28.7288	49.3549	13.4369	22.3318	29.5794	48.5015	63.4389	33.3578	61.4372	81.1805	54.7199	88.3279	63.1544	11.1268	99.0517	66.834	53.1619	44.6806	21.8249	62.2395	60.2918	69.0098	3.15447	26.5541	67.0762	72.1122	117.481	53.4382	100.861	523.107	69.5378	54.8337	130.618	28.7927	48.5459	67.5336	80.0816	45.4223	49.4847	64.3269	63.692	54.4434	41.4862	57.6455	45.6221	102.221	131.718	81.2848
1552822_at	52.7727	53.1584	73.719	67.5071	77.7155	106.541	91.3371	77.4332	69.7021	25.5196	97.52	44.1084	47.1972	84.8023	102.019	58.6915	41.3549	39.4425	37.5404	59.5776	87.1175	37.8463	87.02	65.3681	43.5133	30.3342	46.9889	42.7827	91.7135	44.8173	296.072	58.7466	118.44	47.1702	76.2539	56.8197	84.3965	64.7719	48.5155	28.4178	58.2705	38.6698	103.574	57.3821	68.1145	26.383	107.961	54.4132	83.6785
1552825_at	28.3666	62.4364	86.7512	144.958	82.597	104.759	98.3305	121.947	28.4341	118.246	96.1783	144.33	99.9154	123.852	75.659	105.663	75.7287	84.6203	71.5909	83.0089	100.095	78.181	172.911	130.664	79.2787	136.672	76.2435	100.373	84.1486	90.4241	255.515	119.485	118.939	125.227	106.895	65.8637	71.4449	133.112	122.032	108.672	103.775	92.0184	71.6749	60.8079	104.012	71.2605	160.741	132.923	93.3824
1552826_at	16.1897	205.393	31.1032	134.599	1.67207	5.9717	2.82539	118.952	217.549	102.699	0.493094	103.893	28.2434	265.858	12.4031	83.047	4.03558	35.6746	0.273521	183.568	13.9732	119.381	3.03512	106.865	22.4275	175.298	42.5148	87.4717	38.855	162.334	332.513	91.0098	13.9516	77.2424	0.609593	45.5438	8.16263	120.968	1.67149	118.814	15.7145	74.3282	9.47761	115.176	1.07689	93.8371	4.77599	157.839	51.1895
1552827_s_at	27.3485	134.09	7.05284	209.033	52.9087	71.0193	27.8651	90.0921	214	129.364	5.07962	75.9938	42.0017	147.628	5.75802	95.3385	39.477	76.3893	29.4112	63.3789	33.788	127.45	68.6024	134.972	26.4748	167.02	45.1942	134.81	30.2483	102.611	147.897	82.3782	63.6635	110.807	4.85804	62.0824	34.3505	106.634	20.3597	99.4797	33.5563	100.702	35.1645	88.1247	47.6688	146.92	65.0646	76.9017	43.1959
1552828_at	42.7441	20.0769	6.66209	20.5343	80.5032	42.5286	15.2322	13.8816	59.9968	19.7431	14.303	51.2041	46.9051	62.3641	81.5153	13.153	10.8754	75.3157	62.458	46.565	90.5658	16.7948	9.39623	85.7776	32.362	81.4754	11.496	15.6193	51.4626	122.967	145.091	22.6481	13.7721	33.1411	61.736	49.0606	57.1684	91.8214	36.2207	53.7344	33.5636	17.4749	49.3397	7.63977	101.282	58.5724	57.7622	87.321	40.8847
1552829_at	210.45	128.893	81.5663	182.535	143.444	268.511	153.08	145.027	89.0788	94.6494	129.488	123.537	123.349	248.786	23.6401	59.9667	99.142	180.058	56.9066	71.0879	177.604	88.0402	165.592	163.124	94.031	166.009	210.232	271.526	157.485	72.0758	52.535	146.137	204.678	134.192	198.829	217.963	69.0432	106.42	153.67	126.31	121.681	86.9434	126.629	43.3671	355.177	104.061	157.284	144.771	209.535
1552830_at	46.9209	68.8263	26.9584	68.0107	61.7095	25.7326	48.2916	17.7168	31.4756	9.56261	26.2826	8.9621	36.2358	8.7347	5.58606	6.49954	5.8337	24.1367	51.3594	62.3957	6.78432	41.1365	57.5202	7.86453	9.55103	9.36339	7.69464	3.51944	6.71877	41.0258	233.203	55.8854	41.0828	20.3342	12.4627	5.64253	12.6948	2.90723	24.3687	51.117	4.48381	61.1523	35.7226	2.62291	46.298	102.455	7.91064	46.0695	20.7098
1552833_at	11.1087	25.3509	7.11559	16.9281	11.0115	25.6796	20.3698	22.1053	7.45353	67.3214	10.0995	17.4685	21.1215	20.8276	89.6827	12.9097	26.2063	76.7315	13.5825	18.8874	10.9342	23.2455	20.0403	26.3905	45.8939	8.23421	20.2615	16.7109	15.3964	63.7302	392.272	30.0142	118.742	30.202	36.4317	66.545	11.6606	67.8837	50.1703	40.8936	16.6569	15.0883	34.1267	12.074	15.7312	34.1804	6.12155	18.9327	115.522
1552834_at	41.8317	27.9546	74.5726	153.681	104.063	95.0633	74.8343	8.0453	10.8893	7.0671	27.8627	10.5848	8.4372	70.4819	104.742	6.58625	5.10408	15.2032	42.7728	121.726	13.2393	11.8713	13.6647	29.2935	62.5185	125.091	55.0443	19.0649	5.22372	44.0426	407.64	88.3753	14.7463	75.9627	18.0673	4.43088	4.62989	30.0967	8.39777	41.5344	55.5532	37.1167	6.07906	71.0424	28.0612	66.9969	12.302	113.972	107.767
1552835_at	16.5119	61.6015	29.7983	64.4879	40.2643	19.7942	8.86572	5.71025	24.1975	36.5873	7.68626	36.3307	38.8212	129.555	27.5752	37.0457	50.6885	32.7417	3.72452	67.6116	31.557	29.8424	47.4186	47.8924	7.84857	117.777	66.1046	94.7482	35.0532	39.4204	215.145	11.4191	18.8215	64.3066	51.4843	33.1995	25.2298	70.2545	29.2862	22.4979	20.7202	15.2189	41.3376	37.0056	3.09057	4.8239	64.9121	67.6877	20.4604
1552836_at	9.02849	127.888	109.598	105.082	179.139	105.183	146.355	79.7639	95.1141	117.034	130.121	219.256	130.084	190.409	93.7334	114.238	106.115	168.368	99.2513	133.938	13.8297	21.0364	59.1039	141.425	67.652	202.758	55.9221	131.635	82.7715	77.7818	632.696	177.53	82.785	112.824	94.002	117.214	82.8893	193.343	113.385	72.0688	65.8525	152.653	80.1893	113.172	85.022	126.234	97.2348	183.832	22.4649
1552837_at	13.6638	8.49756	1.94605	10.9885	1.14983	25.1052	41.1042	2.37876	1.18361	0.473716	3.3696	1.3486	30.1494	21.921	7.41229	1.68211	21.3134	11.4819	27.2958	2.01396	1.96735	14.5295	4.03367	1.57646	3.69637	45.0354	34.4725	19.5141	2.13361	0.688318	4.61481	4.23829	1.37447	1.17873	1.63905	14.102	22.5531	0.732149	0.41439	9.84845	1.71356	7.57047	9.77436	6.85703	15.7381	9.35385	19.2686	4.06878	34.8039
1552839_at	80.8842	29.2332	55.1368	33.4594	62.9988	46.8335	100.781	63.7131	41.8305	4.65554	36.4684	49.3931	47.4789	70.0561	57.9354	8.01574	35.2213	76.9563	9.59919	43.7358	57.9667	73.4454	64.2926	28.2231	85.5813	45.8172	39.9352	23.8806	24.3877	62.27	266.522	86.2377	66.7375	25.4881	74.9712	56.8136	33.4219	2.81868	12.5866	41.9694	34.4387	100.026	43.3312	40.0209	56.7065	50.4639	45.305	21.7863	66.514
1552841_s_at	16.2208	49.0053	4.59919	58.4505	58.6938	30.8649	28.4762	7.93895	32.8163	13.21	1.25855	12.0042	18.8054	2.47537	22.2153	18.074	1.25953	46.0079	1.5377	11.1502	8.98634	22.1747	4.89052	9.63716	1.2622	71.876	37.6271	5.19057	5.50755	33.4156	74.3573	41.5312	43.5301	20.159	19.6109	5.99135	2.25544	4.16009	12.1494	12.8332	8.27966	51.1004	6.22515	6.67355	4.59099	7.60065	7.38928	3.00041	47.3863
1552842_at	36.2717	19.9328	9.68714	120.599	23.2626	23.4288	8.37353	7.30068	70.5019	58.3888	42.4994	28.8858	8.96692	7.43782	44.7217	6.71618	41.4782	20.9511	4.46229	73.0021	7.93626	19.1133	8.4957	21.6704	14.6174	20.3282	18.6562	34.0895	8.0014	18.2071	231.491	8.63804	7.04041	19.4754	5.16786	66.3413	15.1409	6.52335	18.3118	52.8457	35.2123	8.2431	8.48852	7.31639	5.22348	5.63527	40.656	49.2363	14.1657
1552843_at	2.71764	4.99083	4.35169	6.25119	1.96297	6.70333	12.5717	3.41977	4.55165	5.94613	1.82139	24.7751	3.86917	7.89712	2.1904	5.87816	17.2461	3.21043	3.20253	6.03267	17.0484	3.76162	5.75546	6.60252	5.37699	2.83484	3.36004	5.8657	5.38683	2.25905	54.1934	10.3569	2.8008	6.64807	2.86173	3.45973	21.5174	6.15085	3.73169	4.26937	12.2032	16.9251	9.30277	2.60038	25.0853	6.54275	4.7716	4.48149	5.73318
1552845_at	267.071	108.407	141.725	222.571	105.939	236.654	128.069	48.2598	214.112	121.333	357.319	106.795	259.131	200.143	187.453	100.52	246.89	194.065	205.522	116.966	320.983	180.38	240.198	224.048	208.111	270.682	192.922	122.257	210.399	234.338	214.073	165.413	208.587	67.9458	207.729	183.781	168.961	146.407	219.518	30.9969	338.129	169.391	304.766	119.871	281.308	141.939	194.278	183.139	232.834
1552846_s_at	206.298	178.856	1303.83	104.598	660.378	292.637	1512.04	166.856	233.531	183.081	1054.09	230.955	1119.28	213.131	2139.27	161.36	309.438	251.885	258.83	134.726	334.344	192.895	1901.99	269.481	578.849	236.445	429.481	178.67	2003.79	166.162	398.286	245.751	159.858	169.242	511.717	142.031	159.989	134.019	233.659	116.245	1177.74	101.595	1439.83	131.635	315.243	72.3783	737.274	199.551	367.264
1552848_a_at	27.548	49.4037	80.5691	72.8713	176.12	158.373	60.7637	105.684	67.4613	66.986	51.6648	23.2468	43.8094	62.0565	6.97531	50.2292	60.89	90.7654	37.7082	124.69	6.88966	67.1142	41.6052	73.6567	69.5939	11.3703	99.0945	176.35	46.7849	74.3697	459.873	47.7088	51.7251	15.617	65.9194	57.9667	30.3692	114.193	36.8102	28.9231	42.5501	48.7298	11.7222	72.5237	65.3867	65.3569	69.5546	94.0009	28.3784
1552849_at	2.54865	6.10419	8.0065	56.6412	47.1398	5.4016	5.32133	4.43938	2.10825	48.3567	12.4631	22.504	26.8548	20.4194	21.0517	15.5563	23.9634	28.5482	2.19468	8.32566	26.5471	31.8308	52.5705	7.80449	24.9346	29.633	6.49293	6.19542	22.3989	46.2738	18.2019	18.844	29.2345	4.73015	19.8797	42.142	34.8323	33.6233	31.2398	29.6287	34.3184	30.475	31.235	38.9552	9.93357	17.1852	6.893	20.3604	34.1323
1552851_at	39.2475	21.9654	2.49358	2.72978	41.9078	3.77601	40.3978	42.1405	2.13033	5.74722	39.3714	24.3417	15.4817	2.24747	15.8734	2.51279	21.6176	23.8278	2.81417	18.7825	2.61319	3.37073	23.7167	3.18974	28.7547	18.4633	6.52893	3.91223	7.18752	2.97013	264.386	4.60818	12.6081	25.9916	3.22996	42.1026	28.135	1.25458	3.43919	3.40502	27.3188	3.74796	35.164	22.1623	3.26078	24.9111	34.0629	1.68546	48.8945
1552852_a_at	5.14438	65.5289	20.3678	89.6506	4.91189	13.2433	48.7103	1.85126	32.8687	36.8755	60.5806	28.4596	2.81828	8.16484	1.67397	41.0466	4.59037	8.46836	13.7928	35.8856	22.5958	8.61574	33.4652	32.682	2.60843	48.5934	11.1355	34.2536	43.1805	54.8642	418.979	22.1618	67.267	65.2634	10.9711	12.0167	2.85344	43.3886	4.30122	64.9107	5.1463	5.79731	37.1664	46.7126	16.7749	12.0802	26.5503	35.0746	17.9782
1552853_at	6.577	45.2805	30.7936	37.1247	6.59146	24.8411	5.73096	11.1621	17.9511	45.379	2.2765	7.50106	6.06389	11.265	6.70338	49.9423	9.13026	63.885	1.76806	8.259	5.15252	11.7396	30.6876	32.9121	6.19819	24.1622	8.61429	7.82876	7.49455	49.6649	76.4893	15.3363	11.5132	43.8492	19.922	6.94585	1.51996	10.9453	6.53137	53.4175	4.76012	43.8944	4.84061	3.02122	10.8288	23.9149	11.5673	12.4089	5.68612
1552854_a_at	51.6063	3.87883	2.59391	54.0916	9.21859	3.2562	7.89735	7.60722	60.1468	20.9718	3.34355	13.8079	7.2422	12.53	5.5991	9.38089	4.55079	6.28351	3.52956	81.5776	3.91684	8.4245	2.60539	12.6364	8.7753	46.4996	3.77905	8.98184	7.33146	11.8295	474.791	11.3342	2.66473	19.385	9.75803	4.87397	2.49728	50.2886	4.61555	5.5726	3.93741	43.8543	37.3741	2.18096	6.24651	11.0811	4.59541	10.7184	42.3119
1552856_at	9.69298	55.3866	39.0837	78.0983	32.1962	46.634	42.6856	45.0946	21.3545	77.0546	31.2316	69.5478	26.6493	58.5284	51.5184	48.0787	49.8814	12.2601	41.3713	27.9306	34.6873	45.1707	39.1647	42.8231	64.4865	75.9615	65.3953	47.0516	57.6677	51.2096	236.123	31.0507	9.52279	32.3968	13.0113	38.5536	33.4844	51.9575	23.3909	46.7393	55.8544	77.2985	48.437	10.8878	37.5547	60.8403	83.8988	69.7742	53.571
1552857_a_at	5.09119	8.54722	26.8838	13.8752	5.07395	13.8029	14.5391	14.9496	46.8501	37.2306	8.30217	3.87024	27.3558	30.9319	12.5341	31.7559	20.0121	9.61717	21.6499	48.4667	4.3804	6.11139	10.7162	26.2584	12.8461	7.05859	28.2048	36.7801	3.93979	25.7001	71.8566	4.44013	3.95972	107.877	39.5594	7.17704	4.98202	4.38547	6.33904	46.7392	13.9385	6.44539	2.76707	5.36977	7.24941	6.07156	11.6014	5.64076	9.04884
1552858_at	12.7775	0.991154	0.228103	5.13572	0.583619	0.518142	30.6482	2.53811	0.857383	5.32688	9.30917	2.5169	1.86294	12.6358	0.843895	0.442518	8.22108	0.718602	2.20308	1.21617	1.32368	4.3464	0.911284	4.64185	0.536294	6.12008	0.794264	18.6774	3.06991	4.85069	177.164	0.8827	8.69847	4.84654	10.0552	10.4925	21.2612	35.4669	14.6639	1.95983	8.52475	12.0473	2.10987	2.07125	20.7511	15.9214	7.03627	1.96942	7.19086
1552860_at	3.53894	89.1557	3.85295	6.39946	4.56571	3.3895	19.5819	12.3003	6.8068	9.9453	5.38884	11.0363	9.4635	8.22334	4.59257	9.73944	10.3719	21.7676	21.6098	13.7213	3.42251	9.87243	5.568	6.02028	4.56946	6.82776	5.38581	22.833	3.58824	5.48221	116.994	11.0301	4.57425	6.04812	10.9905	12.2907	5.45029	6.79972	23.8485	2.99722	22.4396	7.1316	4.50184	30.1541	5.46507	6.25416	6.39289	41.7949	8.14652
1552862_at	189.481	307.059	238.997	250.871	201.572	267.585	188.247	225.098	118.584	202.87	169.556	306.188	222.962	216.271	277.859	146.086	365.214	277.659	328.443	236.056	346.368	212.643	322.54	331.377	287.35	437.63	245.931	333.113	203.79	168.423	740.436	303.032	419.708	356.672	244.594	182.043	272.527	338.578	295.725	255.806	323.186	313.864	384.82	267.716	282.544	285.985	315.677	211.65	173.854
1552863_a_at	238.964	368.644	219.922	421.255	259.174	257.88	286.364	405.377	316.584	435.332	340.84	429.493	298.724	392.972	230.478	420.294	268.637	349.708	203.732	347.644	350.507	656.412	564.089	527.995	320.469	370.286	367.977	400.432	366.705	486.194	577.119	438.641	276.595	561.903	433.195	514.475	226.279	264.455	265.363	320.517	221.924	302.748	239.105	246.996	238.281	429.067	307.22	444.809	272.741
1552865_a_at	65.5521	115.856	43.3727	129.826	93.2095	90.3658	53.1583	106.819	71.8745	129.32	90.3588	95.5827	115.111	107.369	60.8632	106.183	83.6411	92.2172	96.3882	92.7624	171.566	217.838	104.034	156.842	123.949	141.45	93.6392	78.8593	109.803	115.898	278.528	148.152	156.056	207.802	151.248	64.9486	59.2077	111.532	92.8679	71.6546	56.5029	59.8634	48.0755	68.6969	93.2046	97.6504	115.706	86.557	172.493
1552867_at	343.028	237.262	342.373	303.213	468.723	219.364	130.506	236.836	245.407	367.611	687.45	290.805	402.915	350.99	363.195	300.097	340.685	224.274	364.696	409.168	533.679	367.929	445	503.832	177.207	450.235	287.647	358.464	398.501	284.352	761.139	319.616	432.351	342.457	385.6	263.759	265.375	331.347	212.688	200.006	190.422	294.375	355.132	128.726	201.415	170.078	399.682	367.295	270.541
1552868_at	67.4471	18.3757	74.7855	16.9408	42.2805	137.265	27.0528	14.7597	121.95	44.3414	88.2185	173.819	35.2287	99.0968	26.7589	162.82	88.8265	31.4402	76.9524	85.1364	24.4356	111.408	159.051	39.6915	72.4	48.5691	107.868	174.311	144.876	131.398	168.38	48.279	126.881	243.142	71.8026	102.675	83.9036	56.438	51.4815	135.577	80.8562	69.5273	104.373	17.0015	98.7811	158.574	122.159	69.5199	65.1371
1552870_s_at	1.82145	29.0635	27.2413	65.9539	29.6979	2.12522	27.6196	28.2859	0.454542	2.44183	14.2613	6.50678	27.724	20.3703	18.9267	17.6789	29.7092	16.375	1.73074	41.9891	2.2069	13.022	23.6416	98.5083	10.2256	76.5969	48.4035	31.374	4.35514	3.8267	107.082	27.9079	10.837	45.7615	8.10789	27.5892	12.8093	27.1727	29.8443	30.8782	32.3442	42.1487	31.991	46.9112	3.2389	2.17595	24.3054	32.2716	10.1706
1552872_at	5.69998	96.3141	62.9164	28.3848	72.8304	113.466	37.4249	17.7621	72.0905	5.71882	200.208	56.0484	273.663	116.657	5.59504	87.0759	21.7922	4.19609	126.858	65.7368	53.5495	19.0765	32.8143	63.9884	22.512	73.2172	38.5986	160.417	27.1691	10.7911	232.28	26.4575	26.148	21.9546	100.256	114.893	9.15527	33.792	64.6749	22.37	66.6297	119.507	8.06947	62.5934	7.09198	174.96	124.917	169.044	22.3154
1552873_s_at	158.818	239.88	64.4905	187.68	216.75	133.583	93.5995	198.53	163.313	127.841	244.097	241.419	292.025	227.079	201.49	152.337	259.448	167.349	150.461	152.944	179.801	240.106	224.231	249.696	83.0195	171.86	236.808	254.448	149.28	178.882	385.229	115.023	226.449	267.527	231.983	227.698	176.869	169.917	182.326	251.678	92.0106	62.4788	104.604	176.588	172.173	127.401	229.636	209.449	131.27
1552875_a_at	30.2417	2.7384	115.579	21.1157	17.3049	77.0797	25.1801	14.6986	4.09722	1.91257	29.4379	21.68	44.7514	1.67953	8.72495	3.34649	4.92078	7.49647	44.6821	1.89291	1.72981	33.7014	96.8205	39.5652	4.24662	25.4534	8.79409	39.0488	115.897	3.96733	35.6992	1.86741	23.063	1.81784	62.6542	7.30857	23.2814	4.39414	33.1369	6.04764	3.65529	2.93066	1.63543	4.65968	4.9368	4.72426	7.08406	36.6673	31.323
1552876_at	30.7556	42.4142	18.2708	9.42692	67.9586	58.4809	7.36858	47.8162	16.7198	32.7587	26.7179	20.3008	11.7352	47.1686	49.3516	26.7237	36.8479	42.3214	0.660111	71.8503	34.7535	9.19265	42.7205	34.3981	40.5132	59.8983	66.1769	27.0744	33.3464	25.0635	154.55	41.3174	33.2679	47.467	34.5019	22.5558	49.8132	29.8755	3.40351	44.3045	22.2725	61.6391	24.2628	25.8163	30.1686	48.9362	27.9289	2.79859	85.1333
1552877_s_at	62.1031	68.507	30.6498	5.60354	30.3687	39.1689	40.8075	81.7971	28.9406	58.2632	59.1627	74.6761	56.8005	12.6979	16.6067	92.3916	42.5416	77.3534	14.1219	70.4591	43.7323	127.122	67.625	109.73	27.227	83.9864	94.4997	41.1892	32.5001	73.0677	805.06	113.976	26.5891	88.4523	42.5492	34.2537	41.7885	90.9559	40.9083	84.9893	56.7279	47.3284	82.7423	51.0398	15.0779	146.15	34.9996	77.5857	9.34231
1552878_at	24.8445	24.7779	94.0997	77.9357	26.1295	35.5729	41.049	39.8534	17.1882	125.042	62.8192	134.758	89.3081	85.3356	80.1823	155.399	82.2474	88.1431	54.376	145.939	271.473	255.771	109.709	223.786	74.8522	244.016	100.858	100.987	30.0112	98.7959	121.677	195.09	110.971	131.861	28.7764	3.82131	47.0375	84.9201	46.8463	69.1285	60.6706	103.699	48.7487	85.2631	34.7871	62.7086	49.0511	163.118	44.6438
1552879_a_at	54.3055	71.1084	51.6111	231.335	33.5922	79.458	84.6171	121.321	45.126	302.975	253.872	230.298	258.857	158.165	159.133	495.83	147.315	364.346	218.822	268.777	545.924	231.779	285.611	518.724	329.664	825.124	232.113	301.363	70.0543	225.402	75.7217	688.988	282.578	271.135	111.6	65.0231	63.9449	239.142	102.9	121.73	65.6455	415.216	30.9456	320.23	90.6162	404.642	145.216	445.452	149.64
1552880_at	230.217	41.547	231.438	201.507	95.0445	134.385	115.268	170.273	69.6082	78.8341	258.098	94.2352	284.545	89.361	322.439	140.35	279.676	154.547	186.139	119.785	737.874	223.581	302.352	150.253	161.742	133.859	57.1765	90.3645	233.35	158.497	330.569	112.62	253.5	100.076	212.062	197.046	205.658	90.5459	229.961	152.588	392.188	208.288	191.225	151.508	97.873	111.095	466.918	204.164	346.594
1552882_a_at	14.561	11.7773	58.4355	15.0289	28.2636	62.236	21.4669	17.4494	8.52666	9.82626	36.057	52.6835	51.2839	73.8508	34.702	50.8761	26.2534	70.4471	9.35959	26.6865	22.9428	10.6318	50.8019	61.1403	3.52998	47.436	14.265	18.5696	62.252	59.1513	46.1793	30.69	80.6602	138.842	10.4863	59.6696	16.6954	42.4535	49.3539	91.4834	20.6335	74.9028	20.4499	40.1252	6.62702	16.0086	50.9488	48.6144	6.81864
1552884_at	45.9368	116.813	87.7392	138.215	63.1408	42.8267	105.149	62.5181	67.256	115.186	55.3392	66.4708	84.6168	59.5912	123.283	121.84	86.1848	114.8	19.1657	56.3404	76.5499	117.442	84.3664	113.403	78.8123	67.7402	12.4062	141.997	56.0711	102.951	223.401	123.203	86.4893	133.855	85.6715	74.3193	71.0414	84.4087	11.8095	20.7203	71.3932	25.9269	60.3843	40.655	39.7987	17.7782	106.533	67.9657	36.8284
1552885_a_at	109.866	419.327	76.7913	333.188	84.7346	191.421	89.6178	261.224	45.5614	120.458	77.6235	40.5377	188.071	156.203	117.202	181.584	35.3491	293.461	160.47	182.494	121.218	386.406	82.6885	361.261	198.775	141.129	186.865	157.177	131.762	190.002	25.5894	135.773	193.488	360.649	61.8339	205.651	82.5168	98.6482	58.5973	166.883	160.664	235.307	26.715	239.053	154.975	263.906	168.368	216.9	28.9711
1552887_at	14.6192	161.106	94.0115	47.9893	29.3996	5.08308	75.7867	125.841	51.3087	233.297	82.0103	115.153	51.9894	34.0698	9.07515	76.1527	9.31607	140.412	43.7375	71.9652	60.1533	180.313	102.529	120.02	31.0027	130.85	143.581	124.25	71.5527	132.093	39.2835	158.54	74.9549	343.774	43.4965	17.11	25.0551	25.5696	42.1909	99.3433	15.484	112.086	40.8075	84.4939	46.3573	165.324	42.4072	159.382	19.1582
1552889_a_at	1279.44	956.607	1070.66	1116.46	1039.41	470.77	505.114	797.923	818.568	533.924	1838.87	884.327	952.081	766.287	1298.67	595.908	936.777	516.175	1110.6	671.821	2254.34	1334.57	1284.57	994.639	1177.31	896.391	815.364	920.139	589.785	481.574	854.337	524.197	1720.04	593.438	836.703	374.252	1121.76	576.189	1882.19	583.849	824.952	487.337	1100.71	391.336	938.76	735.29	1123.83	468.676	1523.96
1552890_a_at	3.94499	9.45289	29.389	17.4908	14.122	16.131	32.2027	15.6592	22.6164	4.58011	13.1711	14.2969	47.5587	74.8294	29.8127	33.7186	4.21574	4.26186	8.88093	10.2352	9.90328	66.3909	52.8701	81.4361	8.2629	9.15412	5.78376	15.2756	6.82072	15.3758	280.175	27.4356	10.8524	58.4061	10.3693	36.6452	5.19893	10.9588	24.4522	12.4753	5.49476	10.0487	41.218	49.6294	10.0017	6.37597	50.7873	5.03915	57.334
1552892_at	13.1011	19.8757	6.17672	35.9549	102.694	27.0987	15.274	63.768	16.9587	35.8112	14.1446	148.146	10.5583	67.8926	57.8204	26.3733	10.9681	27.0902	5.18597	32.0492	16.2248	43.3416	16.0622	23.594	51.2659	136.369	147.684	16.505	26.7714	78.3932	56.6982	20.2303	30.9668	22.3777	32.1697	69.82	11.5943	31.5938	13.5423	19.5833	13.7184	51.0493	13.6386	15.7397	17.5413	20.0686	54.3501	83.0627	28.3895
1552893_at	97.9354	144.014	162.07	140.952	113.32	166.704	51.5287	133.289	62.9883	129.78	180.992	121.186	155.411	171.85	75.7312	133.98	130.794	125.062	43.8003	177.529	27.1976	199.32	207.872	179.67	122.093	142.236	175.456	207.47	94.2989	158.496	107.085	170.421	166.745	209.127	126.42	112.815	130.727	146.129	89.7041	55.7847	141.506	131.184	112.885	108.48	92.141	106.724	154.157	121.473	138.021
1552895_a_at	3.16131	49.5955	9.31021	26.4979	45.9315	49.7107	21.7562	43.1574	35.957	28.4257	2.04538	59.566	54.7281	37.2212	31.5192	40.4668	27.9909	63.6064	49.1141	13.2417	15.7898	39.4027	38.4077	17.9972	4.10851	52.7585	20.273	36.9315	33.7913	47.0237	295.421	39.9856	19.2346	50.4224	44.0545	102.946	19.3469	56.5627	48.79	19.481	33.0768	46.3623	35.3669	45.3583	48.662	3.27305	35.0135	7.25757	62.076
1552897_a_at	28.6083	53.0721	67.1058	127.351	2.06561	6.13973	46.7144	18.8919	1502.7	26.5648	27.9629	26.7352	11.7262	47.0748	1.00773	34.9209	36.6512	98.4034	1.14103	125.616	12.9857	47.2272	8.86367	49.9624	3.93196	69.6653	58.8608	41.1626	17.7873	33.5054	126.292	64.9993	50.2518	61.1522	38.1116	57.748	16.9254	26.4985	2.65035	58.2587	28.9461	34.8775	26.6942	53.1077	30.6714	20.9902	10.3659	58.1975	26.9946
1552898_a_at	16.0188	5.70665	37.257	9.60088	4.023	1.79071	20.649	10.6815	96.4902	19.5286	6.63049	10.5155	4.2316	7.85914	4.76445	39.8617	8.78458	9.77681	11.7544	7.8182	64.5004	27.0812	2.17085	40.0386	30.9778	5.4273	4.43395	23.0335	1.9519	22.7173	282.113	84.9804	10.6972	12.2319	11.7699	52.3258	8.31743	19.0344	3.67295	2.5	4.03069	16.4816	10.2648	4.43298	4.01529	20.6162	5.7486	3.87403	14.7705
1552899_at	112.043	35.0873	90.0901	65.6952	114.245	34.3085	156.093	131.253	37.4516	71.1467	54.3041	89.6868	76.5761	111.236	7.86835	85.0002	52.5801	34.359	52.9846	31.8022	97.5196	113.063	23.3186	56.7963	49.6782	66.164	58.8529	149.044	26.2953	54.9948	1983.29	19.2342	78.6481	34.7505	42.8089	42.4751	52.4707	77.7689	39.4046	106.326	37.9452	100.935	62.0229	2.78832	85.7558	54.4582	23.5256	73.928	92.2203
1552900_a_at	1.7399	34.9834	2.5969	6.53074	11.6047	38.7	53.0104	6.71808	22.194	34.2166	46.1237	29.8026	36.9595	19.8993	43.2082	37.0654	24.5102	23.8263	35.6787	17.7668	5.95224	49.064	21.7309	55.7376	27.6264	63.8503	26.2084	55.5887	39.2797	28.7614	142.845	42.9183	6.82156	67.7375	28.1058	31.0684	26.3838	20.2893	2.5729	18.1554	24.8196	52.1023	23.4617	35.5189	2.99298	38.8263	34.8852	42.9222	18.2952
1552902_a_at	98.1558	68.3019	3.20918	14.1874	40.8576	18.3818	17.8822	16.5374	5.4624	108.947	60.0328	17.7422	6.74026	18.4516	22.2793	7.33162	20.4233	15.3793	5.47343	56.2862	99.6468	17.6088	5.13005	26.0491	7.32173	11.2525	13.8111	19.9667	39.5702	22.3846	164.204	11.0034	44.8594	11.1594	53.0886	53.1478	9.62073	7.82792	73.0226	14.2635	5.58796	8.57144	44.0635	5.76705	13.5639	9.9068	14.8867	14.0616	68.8207
1552903_at	34.5318	87.2275	54.7283	14.0878	12.7566	4.55465	16.6035	128.476	239.87	100.18	41.2482	43.3479	43.3022	136.972	25.6516	55.4293	10.8925	77.5403	8.48592	70.9714	12.1415	50.2888	71.4694	33.0162	13.7189	90.3915	66.2857	131.476	4.24918	51.7333	217.18	79.8907	67.9191	54.5701	63.6639	67.2522	46.6702	77.6438	7.70265	14.7239	31.6951	58.4145	67.5835	25.8346	32.4174	85.5409	13.3633	11.292	74.8214
1552904_at	2.2527	0.819558	3.68981	2.78392	2.58712	29.6366	0.679583	25.632	11.9467	21.3184	22.3606	18.7273	1.44911	0.669123	12.2132	15.4798	5.57244	21.8052	12.7495	26.6489	25.5165	23.3027	19.5687	24.9095	5.53838	23.2499	17.9256	55.7638	14.1905	2.05355	284.68	7.09952	8.62106	15.1922	10.2249	8.8988	18.2273	5.63381	1.05258	10.541	21.4471	2.14775	4.72017	10.84	13.6192	25.1626	15.1865	1.71432	46.8467
1552906_at	22.2434	0.98405	1.7372	10.0441	6.2243	34.3481	5.66051	1.22213	10.3681	7.64252	19.3637	11.2622	20.0078	23.3504	3.36856	3.48908	24.2606	16.4809	2.61176	6.52268	28.8462	24.2988	0.631151	15.0231	23.2122	49.5272	50.3524	16.7078	20.9689	21.8946	62.1442	3.27734	18.0946	28.8349	16.3929	1.22195	22.2502	2.61819	32.3286	30.886	17.8995	2.04289	21.025	19.249	5.92382	37.4771	1.35399	42.2908	33.8636
1552908_at	1.48545	47.9135	1.46229	2.39008	51.8051	37.8944	1.28923	20.8397	13.5049	33.9685	9.95833	3.74439	35.7009	3.78931	2.27547	7.7845	15.9079	12.363	35.9646	12.7711	9.3269	30.8567	12.1001	19.7644	26.836	0.77935	2.00975	34.8849	8.37715	10.4597	208.716	9.11779	32.5227	47.0521	25.513	7.64861	14.9058	34.6726	14.1091	4.80855	45.668	6.52134	31.7459	26.9759	46.8955	10.9678	44.5585	3.15089	8.49256
1552910_at	7.17638	222.831	171.461	88.4093	98.0701	163.643	78.3136	345.121	38.4474	4.13437	22.9753	93.7536	102.766	132.72	155.73	69.4093	18.1227	4.21766	59.0911	150.701	79.3053	147.773	182.078	180.009	21.2995	75.4647	133.67	147.311	283.442	43.095	112.577	179.283	138.712	67.7725	7.74691	79.525	50.0107	112.192	49.6655	176.023	64.3151	103.82	16.6724	25.2971	78.122	78.0384	71.7993	228.625	145.018
1552911_at	10.4594	101.728	106.915	7.19477	22.9904	54.2156	16.7489	28.2533	27.0481	3.18713	36.4594	84.8876	4.48306	82.8239	80.8778	5.54953	48.7674	3.96798	19.2348	26.8625	6.0716	50.2468	22.3624	15.2088	13.4854	6.58552	47.9268	73.0609	75.7284	64.2009	382.583	66.7043	35.7832	29.1938	47.7577	27.2149	2.68387	17.9356	4.42096	96.2427	12.0468	59.7801	19.3969	12.3162	32.3058	15.6539	36.9135	32.6059	19.4901
1552912_a_at	4.98725	49.425	40.159	75.8732	31.1854	103.565	77.0162	39.4867	37.4558	5.69161	2.89655	5.8849	14.6156	39.9632	4.06451	11.3376	3.78272	37.4401	24.4225	4.3353	22.3473	35.8013	2.90034	34.5011	22.0793	1.98071	36.998	29.0584	34.8109	7.57623	41.8438	3.87202	19.7743	36.2155	5.46215	9.49939	33.0846	21.6108	5.28397	30.0548	24.8447	76.34	15.8099	15.8392	1.28227	3.29457	43.4122	14.6114	51.3567
1552913_at	29.0426	3.1162	1.2638	23.1926	5.58415	6.30204	3.57462	15.3759	1.9062	10.07	1.31831	3.21571	2.09311	33.9993	0.880602	0.550909	0.842176	3.66309	0.818589	31.1577	17.4013	51.7807	7.41643	1.3719	2.18241	1.02031	32.2805	14.6752	2.21759	1.38778	130.073	4.52084	1.17077	7.24707	1.46483	14.9922	19.6543	15.6024	23.0693	0.78544	4.32511	2.28649	8.21113	33.7702	3.57522	2.88551	15.1177	2.53947	18.1652
1552914_a_at	15.8534	9.85706	10.5017	30.7025	13.9742	13.4305	21.8121	15.1788	31.8854	21.8668	14.5062	19.0925	14.6685	32.58	23.6902	13.0382	24.5191	30.9378	12.3316	15.2779	32.1382	17.5556	27.9674	12.5214	12.9725	7.53167	14.5993	11.7278	14.8186	12.79	68.4252	10.274	33.4418	15.7921	11.9287	6.81599	12.3306	8.6018	12.158	12.3163	4.49671	8.92527	28.8212	12.4951	10.1827	17.7558	12.4035	10.2471	27.8087
1552915_at	34.6711	31.7682	36.4895	130.649	35.5289	68.9698	88.5669	128.215	45.5204	113.151	58.7933	39.1443	78.3064	34.8218	52.0196	52.8819	46.3471	51.5471	7.32974	66.1183	6.66074	105.606	40.7937	94.2234	65.8016	175.972	84.4948	88.789	16.1433	59.8306	240.588	79.7512	38.8344	115.007	118.038	73.3762	53.8235	89.3806	48.3543	88.8891	14.5221	68.685	27.0264	68.0333	63.3259	126.72	50.9623	57.7312	49.8678
1552917_at	55.1201	92.942	29.215	76.1465	20.5763	34.0983	54.7808	91.8997	66.9011	84.9107	74.6958	100.583	109.613	77.2448	84.3679	81.5677	33.3689	132.847	112.434	98.6953	124.304	180.56	81.8489	113.162	75.2105	123.614	82.9668	138.21	46.3771	195.664	307.378	112.97	93.9581	173.073	70.2565	78.4428	91.9737	71.4285	7.05401	135.09	76.8239	95.8153	66.6038	96.5543	43.1155	251.771	130.755	77.5022	64.5734
1552919_at	15.1796	84.4553	32.6125	3.9049	33.3409	7.38625	48.1161	61.2166	21.459	18.2597	32.3038	28.799	28.5452	33.9975	23.4026	11.9497	29.4748	20.7016	7.78967	21.9601	49.2861	9.90605	4.15923	45.3443	54.0898	9.74253	54.6343	56.4806	15.3123	28.2995	181.873	19.5902	6.82176	43.0086	20.8892	30.2291	40.0344	26.1573	54.7219	18.8199	24.1405	11.797	54.8945	19.7404	16.7723	2.05869	7.5382	6.38982	41.8192
1552921_a_at	157.515	13.8187	169.704	102.083	99.0157	113.617	80.9176	127.428	71.2144	38.8404	139.955	47.0008	122.327	110.171	106.31	73.7197	150.301	96.4541	142.843	49.5942	95.8889	101.015	133.378	95.1135	96.0422	88.9365	72.4704	29.973	60.0171	74.7469	175.669	38.246	185.964	65.9929	125.145	52.1094	110.162	100.96	100.847	62.2626	148.413	10.8215	119.687	66.303	115.877	24.986	182.312	78.811	149.349
1552922_at	2.82763	5.90917	39.5027	5.38104	1.5688	18.5984	1.21755	9.0381	5.79582	4.23388	2.02326	11.6793	23.464	4.01494	32.7872	6.15686	4.93072	2.06699	15.1654	3.84472	2.17872	6.27334	5.28016	3.12178	2.70403	48.8092	9.67368	10.9918	12.0713	4.90125	142.269	1.60196	2.32155	8.09251	5.85708	12.2544	14.1012	2.15711	5.63307	4.10623	3.27807	1.74841	1.56911	1.08061	6.0067	49.3819	2.13253	3.09357	1.57943
1552923_a_at	36.2525	95.2576	48.9361	166.654	58.5316	39.6411	54.7825	80.1022	29.559	113.333	68.8036	74.9148	105.826	40.9775	9.1496	67.2598	15.8957	46.133	71.3868	73.8916	115.636	161.775	60.4744	79.7523	73.9751	60.7351	63.8802	162.982	39.9266	15.5844	86.9037	53.7745	77.0102	248.01	59.5974	51.7968	16.0449	64.6518	14.6981	66.3313	8.80574	60.834	14.9902	26.7324	94.6384	92.6018	115.139	101.712	11.5102
1552924_a_at	93.5932	13.907	79.1824	146.35	163.907	30.5833	183.558	99.561	149.97	196.013	326.062	211.165	111.853	272.787	103.459	117.724	171.001	193.256	230.131	252.915	209.653	343.218	209.869	210.554	265.461	195.815	307.653	269.295	80.1468	133.286	140.674	165.214	188.621	193.778	127.958	239.985	218.001	189.947	173.655	215.862	63.6084	186.466	82.3526	118.637	183.39	344.103	85.2371	205.744	21.8984
1552925_at	8.26479	10.9241	23.2714	23.5731	36.5411	13.5615	7.64461	12.4505	4.70358	11.6196	43	10.6064	35.7863	16.1407	46.843	17.0819	7.43839	50.6933	8.08513	5.77547	131.913	79.9629	101.858	19.6808	3.72151	69.1709	37.5236	61.9389	28.1639	8.73448	176.571	6.04901	49.9249	16.571	6.47693	7.59022	40.1225	7.72103	75.7005	50.5096	42.8634	11.5921	9.92874	42.5612	8.12901	19.5573	38.828	30.7935	36.1835
1552927_at	22.2386	83.9257	30.9161	89.4002	72.6279	4.45507	33.2226	116.898	62.8405	39.8423	29.9698	95.2236	60.174	44.4804	23.6238	81.938	37.7989	97.579	70.5469	25.7632	64.2242	71.6346	70.0554	88.1777	50.0203	84.9424	98.5748	39.4517	43.3982	94.2009	272.424	37.5388	64.0769	94.8745	30.4426	67.8849	67.494	86.7	19.3274	70.4782	52.4586	44.9498	8.90248	28.9055	55.0236	7.92018	43.8488	54.4674	50.5137
1552928_s_at	54.0127	59.2381	39.9866	55.4667	61.2217	38.6562	2.75945	118.844	56.4111	69.6909	68.8225	66.8368	53.4149	63.8533	41.5783	43.388	50.8836	54.0453	48.563	43.8334	62.139	80.3652	101.487	109.42	37.3335	46.2741	40.3059	39.5647	60.9036	111.837	69.9422	51.853	65.0293	98.9417	68.5051	94.8055	61.4612	93.5189	41.3948	54.1352	40.0547	65.8349	49.5672	55.2295	82.7709	44.396	79.3257	82.5104	60.0137
1552929_at	9.89902	21.9366	30.2098	86.8008	2.0072	10.8487	54.7545	13.0571	13.1021	57.3886	17.5441	30.6288	1.6178	14.934	1.41582	23.4981	1.58598	7.80106	1.76479	36.7225	37.5477	7.75887	5.28793	64.4531	5.79869	29.3276	38.7145	28.9694	22.159	17.6851	280.095	33.0651	1.63622	77.4789	8.38065	7.21744	24.2549	57.0396	14.3252	33.3765	20.9154	27.9516	34.1104	9.37362	32.2457	16.0092	9.31287	5.21635	31.691
1552930_at	98.5486	366.791	117.22	217.972	288.699	237.553	206.159	300.468	99.5082	138.434	186.351	309.782	203.57	293.366	145.133	191.566	167.041	192.792	128.742	199.622	154.069	241.831	201.734	178.677	178.451	203.918	188.311	377.234	178.255	194.158	336.124	231.697	151.589	163.203	133.477	179.799	162.728	301.503	110.519	218.944	86.7703	158.108	122.397	189.828	114.817	136.443	167.259	218.472	141.935
1552931_a_at	999.697	613.278	583.263	621.048	467.356	514.358	537.742	502.044	496.337	799.605	757.959	537.007	452.751	412.91	664.768	644.265	867.727	613.59	757.21	567.161	875.986	894.35	462.961	631.368	490.482	430.516	425.814	353.477	494.996	718.81	722.506	597.77	945.204	811.987	614.463	666.231	779.203	664.052	478.515	600.524	716.2	724.344	614.213	593.096	733.548	578.431	783.376	669.458	810.338
1552932_at	29.7836	32.1516	6.22932	92.0297	10.618	18.0953	55.1309	8.62817	7.90623	9.10763	21.1873	13.7819	20.7884	7.8132	4.75592	48.0466	22.7624	44.7513	6.36606	18.9027	6.11071	19.7123	61.4379	58.8255	10.0489	11.0613	2.51892	9.48373	14.8146	43.536	107.456	13.937	53.5173	61.242	32.8809	7.64585	28.3122	8.59464	20.538	4.42219	32.605	13.6528	5.3603	21.6439	51.0399	30.0838	7.76225	29.18	9.60943
1552933_at	46.0947	1.76948	22.9416	84.2751	9.29304	30.7139	18.9405	88.3285	33.4194	77.9704	53.8394	26.9985	5.28474	5.27899	21.5504	57.8161	2.18843	35.6149	2.30511	8.18322	3.29093	64.1127	6.34631	5.55506	17.719	4.3094	10.1051	68.9882	38.5855	95.744	56.5745	72.444	4.06423	47.3543	5.25569	65.9364	31.2943	41.1144	27.7949	50.043	40.0962	58.0428	29.1326	46.1476	35.7524	44.068	3.12148	23.296	29.4648
1552935_at	74.3641	172.756	115.883	262.412	119.581	104.743	119.83	194.616	63.9261	208.276	85.7508	218.596	142.421	147.679	113.059	197.844	114.427	153.717	78.3015	207.623	114.638	211.766	168.405	197.346	95.3817	174.485	121.056	162.646	108.278	174.82	288.204	181.369	161.407	285.315	196.349	151.359	94.0662	89.6316	107.708	235.511	138.184	177.697	65.7048	126.291	145.877	159.337	86.0729	152.242	88.0655
1552937_s_at	128.255	165.981	115.267	189.984	255.914	179.118	198.952	192.59	101.166	105.807	174.198	191.537	131.282	221.189	107.911	199.92	154.528	118.552	98.2469	156.418	130.258	216.075	185.599	165.717	143.155	131.764	159.89	141.019	117.485	171.226	317.107	147.742	167.477	115.574	149.68	149.649	132.11	123.607	146.431	134.323	133.491	173.749	138.243	198.565	69.133	25.2202	166.824	185.44	174.591
1552938_at	2.60127	83.7743	10.9539	28.8395	13.9939	7.37502	9.08773	56.6343	33.7441	52.1373	34.231	35.5344	23.9165	11.2872	33.7173	47.4376	38.3843	33.1228	13.9167	27.4497	57.467	10.0948	53.5471	35.9257	4.64719	44.802	38.4799	76.0985	46.4867	63.0084	132.2	14.6152	83.1713	65.1844	4.97829	10.3949	59.4153	36.9214	13.6967	86.028	56.6417	9.03439	48.9334	88.2656	48.7086	68.487	50.7929	47.864	79.7567
1552939_at	19.1902	42.6695	24.3239	2.70823	1.84628	38.8849	43.7208	3.68341	41.6075	27.8764	16.9431	53.7564	24.0028	14.9062	8.20906	26.9704	20.1961	2.19642	23.8147	0.588957	21.0539	21.0428	28.4383	1.11335	9.07513	16.5365	23	34.7484	18.3975	16.4767	59.8395	39.9651	14.3474	22.7247	22.6092	8.02219	28.0078	23.8191	32.0759	14.7722	19.6176	38.2419	15.2956	13.4688	32.7187	59.7277	23.6704	1.73919	25.9155
1552940_at	53.24	38.6054	33.7253	89.9813	36.8922	18.2308	56.5825	28.817	96.4579	49.864	42.2614	75.2042	16.6709	22.486	20.5262	37.0101	55.9306	21.5347	10.213	28.1309	35.7707	5.45839	45.5711	12.2072	8.0669	40.0508	8.39203	32.3855	4.13946	24.9974	242.361	20.5448	11.4052	75.5871	27.3036	25.8592	5.63334	48.2103	15.0567	50.8998	50.83	36.2026	15.9344	5.53526	6.30959	75.0294	31.9297	15.6737	32.9468
1552942_at	69.3724	200.822	98.6337	290.847	156.388	59.0874	68.0808	202.839	64.6696	178.037	81.1933	159.928	146.118	147.88	137.545	95.4107	127.946	186.245	61.4832	134.134	113.395	239.799	124.145	192.154	86.6701	116.206	100.36	144.534	129.475	162.873	137.208	158.105	155.819	141.879	122.358	143.393	88.5925	115.102	80.8902	118.548	104.521	133.553	58.0351	87.3605	63.6433	156.767	156.505	113.802	121.956
1552943_at	7.56961	46.0462	13.071	42.2194	20.7568	10.6565	26.2799	10.436	7.87202	13.0878	24.8487	1.32873	7.07786	13.0713	16.0724	1.50762	0.642876	10.9245	1.29228	27.8233	0.990799	10.6568	0.826714	13.8916	2.42306	3.30758	10.2097	2.54346	23.2142	0.229285	85.9665	15.5699	18.238	34.1942	1.96386	6.13998	8.74814	36.644	11.1281	19.0928	32.6362	18.4606	27.7462	4.35898	1.43222	23.5407	24.5012	2.42336	36.3521
1552944_a_at	73.3343	52.1663	18.3845	72.1406	9.41207	106.329	28.2979	42.7529	24.8936	59.493	17.2439	50.7224	33.1322	43.9355	25.2133	59.3763	19.8229	43.0633	31.958	161.445	29.4575	202.888	48.8413	271.487	23.5025	46.5038	45.0202	30.4745	35.4743	36.2451	58.5838	40.8627	135.345	88.3433	26.8734	42.6069	18.3943	45.4952	30.2991	37.8685	26.2067	31.3204	30.8242	20.6929	21.4032	50.4513	33.6674	34.1112	43.3166
1552946_at	5.28535	103.861	48.9766	206.192	106.031	60.6024	1604.41	81.9766	40.5578	65.4625	92.9197	106.351	23.1889	71.5065	25.6792	57.5686	44.0041	41.8403	40.8271	39.0617	22.7818	79.464	12.2609	39.3644	68.8087	86.6631	64.5455	49.1837	22.6746	23.6293	149.222	86.9009	83.7671	83.1782	48.8667	36.1405	74.7473	28.8474	94.452	37.5039	3.57835	52.6515	46.4039	50.8149	67.431	20.6223	77.9196	46.586	44.4397
1552947_x_at	63.0418	97.0938	6.57942	128.808	101.501	23.673	934.678	54.9557	49.1276	79.1659	72.5705	91.4047	35.9318	75.7353	27.2513	36.0861	5.6665	71.9685	62.7924	48.702	59.9374	128.119	9.54316	86.8813	40.3543	92.8576	107.935	73.79	10.5817	11.5535	179.728	47.2703	135.685	37.4884	87.9119	88.8474	76.7944	71.1852	28.7837	109.791	40.623	48.311	31.8792	59.9123	80.7629	96.5249	89.7731	68.7009	50.4358
1552948_at	8.60118	67.0622	5.42545	10.9855	7.91152	59.3893	22.457	8.14687	4.62507	11.26	6.56287	4.52795	4.57238	10.9811	5.61322	13.6133	30.1643	13.705	5.11151	13.3589	8.56893	14.9259	11.4057	11.9491	5.55643	11.9916	10.2901	48.1031	5.55616	6.37063	69.0939	14.8279	9.55517	7.94927	10.2019	6.39808	2.74908	6.94948	3.48259	65.2922	6.53779	7.92381	2.91911	7.23919	11.4244	3.1508	7.14498	5.26847	12.9548
1552950_at	1.40011	50.3445	6.13389	71.6972	12.1264	21.8213	41.1015	24.3769	2.04043	3.19147	2.63179	36.8101	5.04382	53.9941	0.965923	8.66692	2.62338	41.1128	1.17095	29.207	3.14152	9.40311	1.73611	21.7744	32.9573	7.27315	6.53894	16.8047	5.75047	8.65866	46.2621	11.0245	36.3512	12.9991	36.2329	19.5489	0.466342	16.9711	10.4572	2.11916	48.0871	3.13458	6.25292	5.11852	6.1648	30.9596	5.22878	5.41375	20.5653
1552952_at	74.8577	18.1155	7.26916	103.625	72.8903	56.3019	3.13944	50.651	55.364	55.2281	1.45129	80.7417	15.0568	41.261	15.8602	17.7428	42.9438	25.7857	25.2197	42.5114	48.1127	10.8515	53.4543	9.87568	36.3138	109.566	91.2027	34.8044	21.6199	42.0279	83.5559	82.5201	31.3183	105.767	43.5347	54.5333	12.912	61.1668	40.2994	18.7418	48.8513	28.4038	46.156	37.1237	52.0167	112.466	62.7368	65.9322	31.1342
1552953_a_at	59.7298	60.9018	12.302	23.3494	125.786	68.5194	73.1105	83.568	74.3583	95.7767	72.7062	79.2741	48.5169	56.4921	43.8898	48.4464	55.6276	106.2	6.14724	83.6086	79.4936	76.2421	88.2043	48.6728	90.6038	157.792	99.266	55.1647	62.4599	44.9499	192.396	43.8394	45.1659	56.227	65.73	76.0726	62.0224	60.0134	97.6586	82.6978	29.446	6.01461	87.2536	84.6411	53.715	30.5324	97.852	68.4216	7.69843
1552954_at	30.4867	79.526	22.9065	81.1219	39.9438	62.3213	509.655	378.51	12.427	96.4671	40.7849	42.3216	17.2121	43.3444	23.3467	13.0197	34.3423	3.15161	47.066	76.955	47.288	50.6834	29.1436	35.1035	31.4787	4.53393	57.7958	64.6526	45.4865	55.7364	148.693	16.6414	31.0124	36.468	74.1778	22.1895	5.27052	17.7241	24.4212	6.34463	2.08807	22.8774	35.3972	74.1471	45.1955	90.9274	72.6305	11.5325	58.9026
1552955_at	27.8301	13.3593	4.11943	104.009	27.0195	2.49854	5.65226	78.5294	25.3841	101.406	42.4912	109.706	32.9238	30.9235	37.3873	84.3187	50.7057	61.8899	23.2817	25.1044	6.15944	46.1253	15.3111	77.0356	69.032	110.851	101.547	131.966	23.1177	39.2698	208.533	101.176	63.4554	135.831	33.5822	58.8407	33.8349	53.9241	53.892	24.9177	6.56105	86.2019	21.0557	53.673	9.77819	85.0249	19.1426	52.9103	84.8641
1552957_at	5.19192	26.9191	13.9853	32.3322	22.3122	23.0908	37.2522	25.126	2.1121	36.7198	28.5705	28.7084	21.0713	44.1185	16.324	51.3453	23.7807	27.0761	18.9245	52.6258	22.7366	9.15735	4.64257	36.6403	39.5324	18.6607	72.1112	21.0164	30.8491	29.3104	170.426	30.2296	17.4149	88.5321	16.7674	32.5364	40.2958	46.038	10.7209	41.4547	23.6794	20.5956	37.6242	63.919	6.29049	14.7489	11.7861	36.1255	26.0033
1552960_at	2.4865	65.1107	60.1615	65.2972	13.7215	29.9864	33.1427	27.1641	8.2348	12.9841	28.4181	10.4553	21.2169	4.46896	4.86607	25.6612	22.3777	92.096	25.6537	7.53529	44.2468	28.585	106.421	9.60055	7.47259	10.6698	80.5709	43.8825	42.4087	43.6986	177.493	72.5928	8.60939	56.4603	11.5112	38.0352	13.2634	6.54494	29.3677	6.8579	37.7138	40.8928	83.3864	15.3071	10.9897	12.9588	36.7803	44.0697	35.2989
1552961_at	28.0863	12.4329	41.1641	13.1785	48.9671	27.0231	70.282	78.4777	33.9722	34.9792	3.6973	82.818	38.6834	46.3522	61.5605	70.8344	29.5069	2.14013	25.208	51.8195	8.52264	102.624	53.9869	70.8408	44.8406	132.046	28.0154	23.8142	36.4065	45.3586	310.067	35.751	85.0536	136.339	41.7489	13.4328	15.8634	20.4824	17.2821	55.959	31.2769	16.6894	20.522	9.19549	13.9984	46.8862	36.1099	39.9803	63.2437
1552964_at	10.0505	10.1533	11.6526	10.8475	5.31475	5.34754	5.69186	8.20046	7.1145	6.53508	5.08582	6.94148	17.4651	5.57925	7.70577	11.7666	5.30283	11.7961	4.81223	5.81284	4.76612	20.7655	6.22651	8.67701	7.81784	23.6999	10.2592	6.80403	10.5597	9.09017	15.8528	10.451	10.4214	13.6831	6.71016	9.18225	3.97173	11.2935	2.75444	5.42059	7.44545	4.96959	4.78817	9.09433	10.933	6.9159	5.09443	6.98606	8.04156
1552965_a_at	6.77353	7.22393	2.49955	7.97706	10.2518	6.66144	64.4668	8.49386	7.90902	28.1333	11.1949	29.0869	12.0225	34.7784	35.6419	46.4485	16.0742	3.557	40.5876	12.8941	49.4913	41.0947	46.8405	16.043	3.47377	7.88743	43.1253	46.503	69.3254	9.42481	119.559	80.9236	17.7689	27.6298	9.94206	36.6975	13.0506	50.9372	20.3293	36.5069	6.04672	20.4861	29.6972	7.8627	32.5289	35.7368	8.42886	28.8329	22.3645
1552967_at	35.456	104.757	46.2934	127.754	78.6497	49.4333	9.91293	16.8415	83.6891	55.6901	52.8866	74.2761	58.1701	85.8292	61.152	70.3713	49.0872	73.3497	30.6785	88.3098	71.7538	81.2179	82.4935	82.7458	46.9738	64.4082	81.4025	75.0072	74.1602	121.399	162.915	115.581	104.623	124.924	44.8667	60.2756	32.5176	111.096	52.0581	48.2667	44.3002	8.35897	53.4754	42.3345	8.48484	154.688	70.9057	32.5449	63.243
1552969_a_at	67.0438	104.399	50.6185	57.754	57.2263	5.64393	25.6996	118.794	85.1324	78.7109	34.825	56.9236	55.8992	126.691	41.5442	66.635	55.7828	45.1956	30.347	96.6675	65.9422	39.7326	56.2614	145.268	22.936	50.3772	33.2383	7.13484	43.0299	63.3987	86.5574	59.3772	72.031	42.1698	58.6718	26.6261	5.29748	68.6919	14.6167	115.323	23.0612	41.6305	37.1724	55.274	44.7796	59.9457	38.9227	54.9322	70.9564
1552970_s_at	6.77728	63.0553	59.9254	61.6403	55.5599	32.6082	62.1209	115.804	75.5152	25.9497	53.9998	49.2348	69.5022	134.16	48.1751	42.7019	52.1665	22.8258	53.2048	26.1299	54.3678	84.0213	77.2356	30.4773	67.8652	42.3536	21.9026	35.3151	55.6792	51.3282	200.791	54.2782	76.0708	58.6506	37.7921	30.4851	35.6685	81.6911	35.9693	68.4233	46.6874	41.8108	35.0942	72.2217	44.361	69.0664	82.2108	43.7968	83.682
1552971_at	4.44685	7.23939	6.56315	7.20313	24.3354	5.1285	53.587	42.2897	3.92396	23.3017	2.05065	25.1164	6.76399	13.7987	0.992851	3.72134	2.06528	4.18948	28.5435	18.4376	30.3457	24.4936	1.9196	8.08682	1.78477	4.44698	63.9408	52.7448	9.421	4.60277	236.171	5.67061	19.7924	18.8159	22.2963	19.4039	4.38024	3.19516	10.3191	35.0926	27.3265	21.2367	4.21178	5.13637	5.5793	1.9307	9.13382	23.2816	1.74377
1552972_at	0.375556	7.13889	2.43485	18.8041	2.59667	20.2028	19.0095	32.0813	10.5513	24.5725	0.912334	28.1338	12.4645	10.598	15.3222	1.31512	9.73175	1.56755	3.40546	0.218978	12.1141	2.38151	1.94239	0.417737	0.361871	17.4192	5.04444	13.3378	3.9688	4.23733	63.0992	35.543	14.7131	4.57428	0.470557	1.61538	12.9716	15.6463	27.8377	12.386	3.15816	5.66314	3.69036	0.896905	2.40577	0.793385	13.7157	26.1782	16.7959
1552973_at	8.28075	78.7597	18.3357	14.4975	80.1117	60.2004	10.8809	16.3035	3.65015	14.8817	15.0213	14.3739	43.3517	7.4773	12.1445	14.5065	12.8257	9.44481	23.3993	5.69646	13.0518	16.9507	7.25175	6.05937	10.2492	9.31371	4.82476	52.2185	5.88516	14.01	23.2556	14.0386	6.28515	19.8884	12.1267	6.44656	21.9718	39.2916	13.6631	12.174	13.1378	20.2802	26.8714	26.0873	5.64363	12.296	9.31883	7.0092	18.9129
1552974_at	11.4178	1.56125	0.923814	39.9495	2.43123	1.28962	3.53544	1.31577	0.599909	11.8852	10.5006	1.52237	18.8397	5.3777	17.6397	1.37493	16.4558	3.92072	42.1717	0.521427	3.74884	1.7245	6.16356	2.84398	0.491473	3.97328	3.05409	4.80461	11.9698	22.3523	10.0405	8.93537	4.22893	2.75687	10.8872	22.2694	24.586	2.09578	2.37916	4.70312	16.2391	1.40663	20.3034	8.83114	17.6404	14.337	1.01548	1.80602	2.31041
1552975_x_at	19.7381	3.56803	68.6377	8.87268	41.2649	4.6839	80.3999	43.1697	27.539	34.1743	28.1807	21.6919	23.6756	7.09318	2.05064	26.7651	12.2288	37.0977	12.4525	4.29989	6.08145	3.21813	22.5351	31.6348	1.93105	51.0824	34.2608	45.3127	36.6366	16.3142	68.7971	50.9594	44.7126	24.4824	13.9079	17.2614	16.4455	25.806	4.12947	4.40641	15.5165	4.33144	36.0672	3.43647	42.9039	38.9332	45.1951	19.3941	18.4727
1552976_at	133.928	196.703	54.4355	215.241	171.804	166.497	112.934	343.136	123.022	184.388	161.596	212.855	89.1375	171.355	132.157	133.63	45.6329	189.975	112.84	141.783	170.036	288.829	223.208	194.393	137.886	218.983	227.14	180	118.905	193.885	546.941	200.426	200.521	275.844	120.909	138.378	118.698	171.23	141.238	156.634	76.2532	155.966	120.564	132.158	124.373	237.538	202.031	169.556	113.45
1552977_a_at	447.825	466.097	774.424	284.045	502.701	845.507	553.335	435.432	386.859	464.683	701.114	492.928	724.128	397.461	636.566	331.509	523.735	294.243	505.337	301.63	624.312	361.158	810.615	302.55	304.711	229.876	360.617	279.374	536.5	293.386	1262.36	264.022	471.954	265.366	382.709	406.815	536.563	265.064	524.739	263.853	419.354	214.529	466.279	278.942	567.202	230.194	551.677	271.969	609.815
1552978_a_at	553.376	475.958	517.887	440.134	244.552	264.145	340.088	587.795	489.311	408.392	352.524	326.032	401.687	487.949	400.841	358.374	284.487	382.705	269.392	274.696	375.619	625.399	432.414	479.868	555.766	227.47	198.478	161.627	346.235	510.008	832.612	324.745	542.032	485.656	469.423	404.103	349.544	387.771	220.339	359.856	303.561	274.147	319.332	297.116	225.255	299.229	446.979	489.119	709.369
1552979_at	54.7502	82.0418	0.959989	55.6371	9.63034	1.89575	27.7023	5.12365	5.07206	3.76781	2.58391	50.6925	43.0689	14.143	2.37176	34.9087	1.98047	39.2045	56.0452	30.5841	11.3924	12.9334	35.7346	3.92485	29.046	5.78543	7.85483	25.2449	5.45922	4.02576	89.5631	6.67274	5.146	52.0716	5.54166	3.48205	10.6921	57.5907	26.7414	8.15269	45.4743	3.36458	30.3735	5.11644	6.45378	39.0485	4.87537	5.12517	44.9637
1552980_at	59.7712	181.089	67.544	130.113	155.207	57.504	139.849	218.508	53.2428	172.7	94.6384	117.619	136.036	102.07	63.0175	107.233	125.881	197.591	71.4849	176.283	87.8227	119.377	18.1704	122.502	122.055	220.511	163.584	96.7298	133.309	186.521	264.147	126.868	83.6132	265.043	169.716	164.899	99.4793	192.147	33.2696	163.937	53.7953	178.494	53.2704	208.953	24.5827	274.579	104.65	166.053	90.4249
1552982_a_at	6.79686	17.1595	48.0104	14.0723	5.54938	52.9046	5.31515	26.0293	10.6083	58.576	3.1964	9.22513	3.07811	11.6663	4.65455	6.21264	6.66309	8.12149	4.49321	15.9015	12.0945	22.7583	39.9153	14.7624	10.4264	18.112	64.3723	2.89376	36.0378	12.8682	16.3169	42.0327	11.0281	5.80601	9.1732	16.5147	9.20071	10.8887	8.78381	12.3361	2.76671	5.89907	8.5793	5.37884	25.4558	8.67012	37.3617	7.51338	52.639
1552985_at	10.7473	14.6516	31.1242	112.39	97.8801	37.2114	53.9124	158.884	13.2655	70.1857	43.7389	84.1716	11.9751	81.1148	88.8067	57.8891	52.2553	113.477	52.1527	77.579	8.36045	113.223	42.0107	222.081	98.3881	125.671	43.4893	74.729	58.1608	71.9197	275.942	70.7695	115.566	206.966	32.0635	142.642	36.2334	47.1096	30.798	98.6351	49.6721	69.1355	21.1794	58.873	4.59904	101.112	65.685	114.587	43.0938
1552986_at	83.7215	38.9524	89.5714	65.8588	62.3346	62.6116	86.6871	59.2126	99.4279	54.6375	190.421	90.4855	129.234	108.227	136.016	48.0909	109.082	112.738	64.597	14.397	119.073	88.6314	197.028	82.5957	114.466	108.652	106.061	131.298	131.127	59.2128	208.551	103.281	102.718	20.1594	81.3091	53.6242	113.507	121.775	102.342	54.4033	183.24	41.165	71.5468	8.28642	235.407	104.654	116	35.0048	146.69
1552987_a_at	2.22898	22.9171	31.5001	0.917128	34.9907	11.9686	41.7115	16.1322	0.793401	23.4922	14.383	1.38019	1.03296	11.9688	8.11884	0.846975	11.9627	0.812945	13.5941	21.6721	19.9099	1.07617	41.7999	0.796991	12.0536	42.3803	18.2481	25.9084	15.769	13.241	98.9243	25.011	6.8478	8.16924	12.1441	2.80779	1.96779	2.86588	19.3736	2.4219	4.45695	29.1632	32.8573	3.49627	44.4846	30.2721	5.9073	23.0428	32.2875
1552988_at	54.4118	96.0541	51.1506	132.579	46.2895	52.7829	33.7439	62.1376	52.9492	14.2275	9.32702	22.4883	39.5741	50.0774	56.8457	42.2938	57.6883	39.3211	10.8483	48.3037	12.9001	37.7826	64.6092	55.4964	56.3484	95.9064	29.2375	45.092	60.8833	25.8048	84.3922	31.529	3.60801	73.7327	31.5966	40.5484	27.0413	67.778	39.1998	82.6608	20.1957	55.0786	9.29799	58.4145	15.8957	37.7428	38.1646	60.2893	5.94246
1552990_at	2.19447	2.88833	4.74041	11.3032	4.80644	5.97525	11.0094	3.84644	3.79517	5.30328	4.27529	4.9115	7.12155	5.41721	4.01563	4.32286	5.41222	3.77373	3.79014	2.9104	4.46586	3.48122	4.44152	5.80161	2.59487	5.72761	1.89997	7.25591	4.32627	6.56014	463.32	4.90358	7.15383	3.64751	4.88426	6.87079	3.07674	4.3307	3.16388	3.08527	1.47611	7.6218	2.22973	3.8716	1.85499	3.87362	3.7511	6.1415	9.3769
1552991_at	5.44389	37.6285	2.91384	120.891	7.15094	55.7356	10.3642	93.3497	45.5127	6.65086	24.6771	5.91481	23.0131	27.4705	5.23803	2.90528	10.2518	22.0376	2.30851	39.7526	11.4998	93.4737	15.2657	21.8187	38.7885	54.0809	76.2481	86.4476	35.216	39.741	68.3465	46.0213	54.9921	12.7229	3.32927	34.8408	10.1497	40.9152	37.3924	44.8525	52.9742	8.91314	27.6159	55.6789	23.0414	47.2875	53.5253	57.9713	52.721
1552993_at	1.71862	40.4265	1.36303	8.92892	3.1909	1.91786	4.22104	4.39231	12.9356	36.8321	11.6416	1.69695	1.17937	4.44861	2.48368	23.9107	1.59275	2.59775	5.48583	3.98021	1.77642	7.24007	2.73192	6.16274	6.8056	9.70408	6.50036	55.5046	2.38581	2.16874	329.417	2.61739	3.1126	4.08558	5.01619	5.44899	3.41219	24.5783	1.30212	3.84406	0.715584	5.92319	6.89913	9.76097	3.33888	23.0791	2.45974	38.4518	5.63708
1552995_at	61.5816	49.3345	42.8162	159.142	44.7133	84.1801	130.796	58.0863	18.4063	132.298	5.26604	61.5138	11.7947	55.4179	18.8532	83.0486	62.4621	6.55471	16.8933	100.86	21.1737	161.087	16.9224	158.276	9.44191	131.589	14.3002	111.764	84.4685	122.069	92.2469	66.4732	37.322	186.18	7.6808	16.0994	64.4064	101.973	4.28592	91.3377	6.48948	109.196	71.4985	74.3064	10.6107	7.2519	9.6571	61.5117	11.2258
1552997_a_at	19.704	13.278	29.8942	33.9899	64.7464	19.7046	9.82173	6.57716	3.77312	78.0773	57.1489	14.9104	58.5867	68.6285	84.2758	14.8352	80.2003	10.0813	77.1997	15.888	37.0395	20.5682	23.9574	55.3833	19.6215	84.9288	14.4783	42.866	35.999	8.48362	475.164	52.4535	17.3431	14.8678	55.9199	67.2153	54.7612	4.73777	4.14366	6.85456	73.8921	15.7064	10.3554	10.0163	32.0405	11.0258	76.4516	7.89299	10.8645
1552998_at	1.76605	54.1358	4.92356	3.60302	3.48123	26.9795	7.37883	68.3424	11.4585	5.57161	5.04055	39.3421	3.9118	5.51764	2.97616	41.0666	5.67023	8.38436	13.652	7.12389	1.45342	14.6368	3.81676	12.9028	2.13423	66.4111	2.0714	2.76664	1.98564	14.3042	162.165	5.1032	11.0453	62.3601	5.0154	3.66539	42.2812	7.58406	4.01912	5.36052	9.54375	3.16472	2.93125	6.13328	3.89474	9.66468	5.69827	4.59771	2.51966
1552999_a_at	11.009	10.8854	20.3462	53.9627	6.27313	42.4201	28.249	21.4418	4.68758	37.2834	6.64377	13.7498	2.70565	4.09788	2.26954	6.54898	22.5802	10.4665	5.29998	7.22254	5.9788	9.40804	6.63685	32.3499	7.95106	115.3	45.5942	72.1062	6.11965	32.7338	91.2612	2.56032	13.2238	68.6999	1.99998	3.12175	4.02243	5.40296	1.10351	12.7459	5.71327	16.1271	3.23769	5.77707	24.1709	13.8789	14.0723	36.0271	5.14658
1553002_at	12.9178	42.4678	4.69507	75.5219	48.2729	4.07151	26.7398	43.3907	30.9201	62.1915	31.4761	6.46141	85.8271	48.2076	44.4258	27.6298	22.2202	11.7216	2.06029	46.3185	17.9636	86.1929	4.61902	57.5157	20.4531	55.249	16.2282	7.13181	26.9708	55.6302	70.3754	34.5169	51.1818	76.1471	7.7492	11.5848	18.2404	41.2432	16.1835	63.0074	47.3088	32.9826	21.3324	11.306	11.2314	11.5336	44.5907	33.5507	29.504
1553003_at	142.533	56.925	29.6827	133.814	64.6265	59.4489	28.8264	150.693	11.4303	70.5259	34.0784	121.954	68.4329	74.1174	85.1217	74.8645	30.6915	94.1271	42.0332	81.293	91.846	103.372	123.53	173.378	86.0377	58.837	59.6278	102.435	74.3507	54.6285	645.298	102.393	68.4103	126.885	109.599	106.577	61.0038	102.357	65.7787	66.5742	71.3963	25.0419	7.28198	60.8135	68.7021	84.5767	103.514	106.112	73.9674
1553004_at	47.3379	25.7944	46.394	25.6501	43.6096	87.9492	60.851	55.2404	13.0818	37.2186	91.8962	11.744	21.2105	8.54615	22.5616	6.94168	24.055	45.4164	9.64871	15.0016	29.4274	15.2304	6.97891	12.9266	26.0772	134.488	9.82437	4.27964	36.4682	15.6036	464.417	35.0915	96.3319	8.86023	18.5925	27.7627	26.91	2.03718	56.625	25.6179	72.0149	28.1031	16.608	34.0626	31.212	8.54197	53.2425	27.8788	56.2675
1553006_at	5.69729	48.7686	21.0291	109.083	51.6221	42.0995	32.7206	5.68309	29.4184	47.1653	26.5394	22.9494	6.44092	8.34237	54.1771	31.0947	7.69607	22.4375	31.7295	29.3816	6.55659	70.4356	29.9181	23.8828	39.2792	125.439	61.7146	64.3863	41.6144	39.5556	312.346	13.9172	7.80214	90.2265	103.667	6.84278	9.47066	32.0353	61.4433	7.31867	3.79747	9.09884	74.6139	54.8253	35.5656	65.9399	8.04365	45.1953	56.8785
1553007_a_at	12.8297	42.4923	3.99861	83.6753	7.00714	5.7459	2.58505	78.9794	4.09389	47.485	4.91364	9.86731	3.0148	12.4468	28.1879	13.5915	4.80847	3.66083	34.5826	3.29462	3.97186	7.15898	5.44241	17.132	3.34424	46.8888	30.0152	11.6999	3.1208	51.7199	204.177	9.80346	5.89469	53.3878	1.89517	8.89646	14.2766	9.48801	1.46723	11.0202	4.22086	34.7933	10.7061	4.41181	15.0361	3.856	30.8217	3.60665	7.66716
1553009_s_at	2.0939	4.45635	6.17602	5.67173	3.201	4.31604	3.23593	3.82993	1.99537	3.79505	2.06197	3.48524	2.48861	3.13797	2.55951	2.39049	2.28871	2.93248	1.57789	2.95291	2.67639	3.78898	3.06616	3.92949	2.64493	4.58202	3.62499	4.45478	1.73394	3.29241	34.9467	3.26311	3.38697	4.56933	2.48663	2.45889	2.18402	2.80768	1.69659	3.08538	2.55283	2.38937	2.5956	2.7028	2.89973	3.55917	3.23339	3.86463	2.71222
1553011_at	80.3944	63.0311	42.0362	87.1413	9.26493	144.605	62.1624	37.155	46.3864	11.894	13.9866	21.9105	11.4977	34.692	49.1377	9.25216	48.7222	32.9138	9.20025	77.7796	9.79243	12.3112	22.1459	110.283	78.6669	43.0814	48.1176	14.9163	40.8879	47.8031	8.8284	42.903	80.0549	68.0829	35.6605	53.3096	56.6356	61.6267	90.9845	15.1909	44.875	65.3445	80.6069	49.1186	71.9149	13.5498	115.296	76.8875	136.772
1553013_at	63.2745	12.3766	30.3364	87.9851	31.8672	71.4815	82.3527	62.8506	122.182	29.2675	48.0526	9.63016	54.435	66.645	54.6007	65.3533	52.5271	76.2365	63.6912	38.2645	25.2518	96.3387	99.6588	59.1284	51.1391	50.098	69.0679	5.0143	36.8546	68.5864	237.813	68.1649	5.50393	28.9886	11.1451	65.4311	1.70168	48.33	5.7105	10.9222	67.0479	72.7535	1.12609	8.94814	59.7297	38.51	63.2067	57.7566	37.3629
1553015_a_at	153.19	48.481	58.3671	274.871	187.875	76.3046	148.962	156.519	27.3969	172.229	101.233	125.453	161.191	89.4369	11.8063	43.024	70.6055	105.975	28.8534	220.169	257.045	194.157	166.814	251.306	58.2869	46.1444	158.299	104.011	80.9559	148.712	171.32	97.6042	185.753	208.388	103.306	100.256	12.0461	18.7871	81.5458	58.4828	24.6926	86.585	144.127	16.0471	44.7799	192.814	51.3471	99.2773	248.097
1553016_at	111.372	206.244	9.163	20.9682	72.3306	66.4532	12.2995	161.309	44.1307	103.481	33.343	188.482	27.5669	153.331	11.0102	60.3162	57.7802	122.389	40.4122	203.825	59.6613	145.317	99.7631	157.601	63.7344	142.785	11.6981	81.9917	76.3556	145.931	184.964	146.696	63.1046	240.858	109.256	89.9523	13.4189	116.516	19.1925	72.5653	114.337	109.778	54.9545	80.0122	12.8045	64.6597	82.1029	130.427	3.29369
1553019_at	77.4348	23.3959	18.1683	202.751	12.7169	109.868	53.7924	25.9913	18.2937	78.3522	14.6697	9.66821	9.81084	64.7536	8.09153	54.886	69.1743	91.7542	12.7752	67.2374	15.1157	137.21	50.0767	34.742	40.4034	18.8045	26.1403	27.4046	25.5761	28.9954	168.054	61.8536	31.8427	26.8111	39.1758	22.629	59.679	20.2889	59.4799	12.3617	39.5622	21.3495	12.3577	39.0597	24.8378	141.437	61.7523	24.8049	19.757
1553020_at	55.0381	86.0166	22.784	109.11	52.1053	102.073	81.8351	31.1138	33.2923	77.3626	7.60405	88.4253	59.0212	5.15337	18.5468	52.5104	52.8822	42.925	39.9521	25.6457	20.6498	46.2033	32.5203	43.0698	38.1893	74.6399	53.1778	34.6309	4.6796	45.5465	179.442	47.722	44.5401	50.7017	54.7028	22.2151	37.8181	19.7595	29.0373	44.1067	37.929	34.1639	36.0763	9.3488	30.5367	32.2288	44.374	47.2758	85.7858
1553021_s_at	44.288	84.3093	42.5757	58.8854	112.241	43.7445	107.788	11.8294	65.1683	99.4033	104.954	77.1039	88.144	136.424	87.4892	57.7234	80.8028	44.2718	55.1151	68.5601	161.406	23.5235	112.718	28.7106	46.7234	44.7099	47.3965	65.3986	48.3079	10.4201	5.56163	42.5216	78.7445	14.6076	115.293	92.3539	57.7856	116.255	105.614	33.0633	96.0803	14.1246	94.8768	10.1776	79.0559	134.188	103.647	32.0744	122.385
1553022_at	1.59148	0.194317	1.41656	46.9167	23.5679	3.76033	3.57483	8.0274	13.5454	30.6904	7.7292	33.4797	37.5461	9.02617	0.67821	12.8111	3.54895	2.7936	0.658689	18.1034	0.895287	1.33814	3.02013	1.27842	8.0814	63.7908	36.4433	8.34707	22.7758	1.88692	224.55	0.704758	10.5343	8.62443	0.590827	28.8629	0.911184	23.6483	0.857903	39.5581	2.34839	21.6679	4.42357	8.15002	2.24189	7.46419	2.82449	34.5211	38.7951
1553023_a_at	48.9383	74.3414	81.1428	125.229	35.712	71.6527	114.915	92.825	103.269	105.302	82.2733	76.8647	46.2764	68.9263	51.8653	106.4	57.44	47.3676	59.3887	52.6936	49.8764	81.0907	26.3152	61.9229	67.0546	164.982	57.973	66.1364	39.5484	108.462	138.632	100.61	70.8743	136.426	73.4896	43.1234	32.9427	72.0677	52.9636	16.5725	36.5739	16.7265	77.3366	26.9377	44.0566	53.3903	84.9576	39.2717	109.346
1553024_at	14.5509	3.50078	1.0275	15.425	4.26113	29.3461	2.72456	16.8107	16.811	29.8598	0.868188	11.6298	2.15384	38.6126	12.1106	1.97671	13.6906	1.33473	20.921	3.16434	14.5797	17.0832	0.711354	52.2346	22.2383	2.43349	5.19998	6.04439	24.5671	0.638381	111.027	24.3445	14.5163	5.26773	19.9713	1.38336	0.8182	6.02567	13.5954	4.22109	2.45786	35.057	2.80779	25.5453	15.8116	1.4847	31.2619	7.08992	28.5141
1553025_at	38.0226	65.3183	22.0027	58.1727	9.32374	16.9487	47.8065	46.995	6.96836	3.87798	8.82959	13.7319	26.8453	1.74196	34.5112	33.3704	8.17924	10.9422	6.4045	30.2261	24.9131	56.0917	20.9855	45.7059	37.4088	70.8443	71.6922	49.3008	43.9434	9.30139	87.1906	10.3783	9.25776	38.3403	11.041	47.7335	11.4609	8.47053	4.39645	16.6813	41.3419	18.9605	35.8425	5.57105	13.2111	25.5881	23.4841	17.086	11.8223
1553027_a_at	70.4733	66.5733	158.736	101.321	77.0526	91.1841	171.982	33.8258	32.4303	131.287	19.0556	9.94188	16.6664	53.0109	19.4679	63.6073	17.8606	130.99	12.3006	90.9804	12.2768	96.9391	13.6828	13.4479	51.6977	16.7326	81.8333	14.2301	99.5612	34.2307	250.331	62.1288	79.9173	54.1178	22.9645	62.9735	43.8263	16.1306	102.735	24.6846	58.6977	25.954	320.228	20.6163	57.0343	16.772	13.4214	97.1055	70.1153
1553028_at	52.4855	12.7177	34.5245	12.7731	36.4865	81.6072	58.8969	3.65427	18.7934	5.41667	10.5558	12.6869	37.6562	7.17047	6.02858	10.6293	39.9566	6.71507	6.71221	12.784	63.8882	122.327	13.8902	57.2114	7.375	8.65975	30.9514	5.84263	4.27234	11.9203	165.568	8.67359	14.988	58.1929	11.8437	10.391	5.22318	7.00821	6.16159	11.039	2.08636	9.17843	7.59638	7.14832	8.64149	10.7494	45.7613	9.04805	43.5577
1553030_a_at	173.428	394.736	234.609	737.913	285.4	331.633	355	695.877	287.506	784.77	265.642	425.001	163.332	322.632	200.41	492.071	278.746	427.696	186.102	462.953	278.687	717.274	305.215	531.851	201.429	295.697	260.003	289.134	265.354	536.536	222.055	379.109	243.905	544.16	224.883	327.175	188.046	434.625	251.921	611.412	200.77	627.135	183.847	454.499	196.31	530.931	247.023	556.077	158.878
1553031_at	6.87132	76.8674	6.04375	74.1958	40.9382	60.7134	4.63558	63.4876	72.5893	8.37852	52.3874	26.4013	26.2763	19.5286	4.13957	30.748	27.2467	38.502	18.9394	55.732	7.69716	38.3503	39.2908	14.7106	46.3965	35.5614	65.8678	43.7425	46.9859	25.5808	492.514	15.7238	41.0766	51.9735	45.5915	10.4558	33.4011	38.5075	24.3736	5.35879	7.37807	50.102	3.00377	37.9077	9.31169	64.9158	38.9133	26.5553	29.8998
1553032_at	6.77232	14.3069	3.30679	6.6207	5.30168	3.9694	4.0925	4.14166	6.07171	9.98314	5.99935	7.35218	3.6132	13.655	5.40768	7.74105	21.3652	7.50962	7.79821	4.51149	43.2045	8.6601	11.8251	7.88474	6.75581	3.11707	14.9538	3.13421	6.08563	4.05954	200.311	8.45203	8.83213	5.76909	3.62789	3.02893	1.69323	15.6526	7.12765	7.48895	5.53277	2.35297	7.01986	19.951	7.53109	8.59279	3.67031	1.25873	5.66634
1553033_at	18.1645	25.3705	7.99563	30.7354	39.559	47.3652	19.674	52.6517	123.531	5.83881	2.40422	47.8282	2.63041	46.1877	1.85123	4.04915	17.252	18.6119	5.05212	45.5622	2.99309	9.18963	31.0388	26.4743	24.3027	30.0684	3.69121	16.299	2.60186	9.56494	112.994	7.46188	28.6229	33.5735	3.59398	27.7974	6.88719	5.17977	24.668	19.76	3.85642	11.1582	4.3156	32.4723	6.74516	35.208	8.34109	29.9664	42.474
1553034_at	199.689	201.047	259.982	202.832	203.767	245.808	271.424	177.695	103.494	120.446	163.684	119.532	188.543	227.511	244.879	133.504	188.018	105.87	189.239	131.127	228.003	87.3386	205.099	154.715	215.192	178.086	239.319	181.11	162.575	208.892	320.339	140.305	221.769	129.711	231.579	287.175	171.026	162.937	218.764	169.68	197.653	105.796	174.468	134.126	238.965	139.414	279.067	126.206	313.884
1553036_at	3.47739	7.00542	27.5098	2.30242	34.0938	4.01605	41.1403	42.6884	35.0048	28.889	37.3978	6.3618	46.1924	12.7663	34.9162	35.3129	28.3644	2.95955	4.92735	17.0214	47.322	38.7073	19.1467	6.14901	10.8435	86.5528	4.09406	5.50757	11.5415	4.81396	224.252	6.6339	40.8458	4.10082	33.9574	6.27255	19.127	4.95845	38.927	44.2235	46.8193	29.9935	22.7861	5.02655	15.1152	5.71115	66.822	1.17468	89.2727
1553037_a_at	20.8991	13.2263	28.5518	64.3502	56.6568	43.2142	23.9622	65.9309	14.8198	5.59977	2.96392	34.5687	22.0277	4.48972	38.3558	38.4493	37.0529	64.6198	28.1	54.574	3.07135	39.5048	17.6148	39.7254	18.9679	5.86236	4.05858	11.7035	58.6523	38.2361	67.2298	10.7054	2.29006	38.0143	2.82315	4.75174	14.0311	29.9212	23.6261	47.7673	44.4908	48.1043	45.4757	43.4616	24.8726	41.5455	74.2674	45.9329	5.30758
1553039_a_at	10.9596	18.1248	8.07029	25.2616	13.8897	26.3979	14.2545	14.0911	14.6072	14.6896	18.6231	24.7375	18.911	27.5912	20.7146	25.4967	17.3549	22.2286	14.3402	31.9171	21.9216	30.7025	17.0869	30.236	22.0213	14.7693	26.1708	20.8523	15.4597	21.3917	154.761	21.3329	27.2457	30.2856	19.1131	16.5	20.1399	20.222	10.3533	20.6161	18.417	15.2313	18.1472	16.4752	11.3591	17.5545	21.0553	16.0203	8.08155
1553041_at	5.42276	16.3497	6.97912	35.5635	10.3656	3.49506	19.8012	6.37038	9.24358	10.3062	3.29205	5.26551	5.28951	5.59443	8.57622	5.84118	4.10536	11.5445	4.36051	14.5248	4.89837	7.96002	14.4547	19.2269	4.28762	9.59278	10.0225	5.67091	3.81622	10.5772	14.0315	2.62654	7.26308	27.2548	7.933	5.67593	2.93896	4.2091	7.15769	6.09161	12.6085	90.5815	3.05942	11.3562	6.1702	18.3465	7.52709	11.8995	5.48563
1553042_a_at	241.94	150.687	152.888	200.807	93.0277	86.6962	71.7002	215.624	313.723	111.641	236.4	158.499	318.573	241.92	275.836	91.7614	148.042	146.6	342.814	113.637	252.399	283.676	379.07	176.58	98.9982	14.4718	117.265	178.542	549.097	174.595	225.947	103.04	166.019	161.746	317.066	363.665	204.919	141.131	219.392	55.8681	173.607	83.1117	118.223	65.14	224.127	200.152	175.766	157.602	133.474
1553043_a_at	268.787	63.7634	333.187	9.77481	315.061	529.554	385.451	7.8616	255.548	11.4224	322.801	53.0553	325.086	47.418	507.765	124.646	215.371	75.2359	455.453	51.0812	469.032	124.037	564.312	51.6484	231.504	6.731	198.14	162.264	394.209	43.4056	258.99	28.3121	215.329	7.92096	429.581	137.609	343.511	18.6521	368.605	98.3762	141.262	25.7035	275.209	45.6175	178.969	32.9719	276.021	42.5626	206.675
1553044_at	78.5482	24.9503	29.8781	55.9404	22.9567	18.8004	40.4744	51.3472	46.8836	52.5663	70.436	10.3644	28.2094	33.533	49.7526	28.3211	33.8958	77.3067	46.2145	7.69346	72.246	49.522	62.005	16.2387	39.4906	105.843	75.4473	29.3038	5.90534	42.132	180.151	84.9646	54.4543	54.3086	47.8469	54.0003	78.0392	35.1796	63.9107	11.1976	37.8444	11.4904	93.5364	20.0021	62.6521	59.0689	21.0838	50.3979	14.9147
1553045_at	6.47485	15.4882	47.8871	55.0319	5.29833	4.37939	16.483	2.98886	13.7866	56.2117	2.06416	17.2686	14.3355	5.32458	5.87817	6.74448	43.7856	29.792	10.3133	6.19101	5.70017	6.23288	18.3875	18.2569	15.5767	4.72676	46.4756	62.5571	10.9744	44.3448	169.763	16.5243	14.0767	6.31243	17.8048	13.0662	41.6855	38.8369	4.6256	3.98433	34.6359	49.5376	40.4168	12.3571	8.26429	17.0124	5.89719	9.62276	65.1063
1553046_s_at	69.3512	25.6252	13.4379	38.5515	231.712	16.4474	124.822	12.7057	34.6374	19.2283	19.2542	26.2538	13.9356	37.9138	114.62	18.5818	83.1243	6.51652	17.9254	30.223	166.381	31.1602	13.833	31.3743	84.4262	47.8781	41.6693	25.5073	56.2011	26.414	297.271	30.8965	91.8757	43.7562	22.4793	19.5018	52.9177	18.3964	17.6106	37.9787	15.6704	23.2186	20.8875	19.8899	22.5181	22.4007	41.3853	19.7182	189.247
1553047_at	125.483	112.296	125.503	162.062	205.81	161.1	156.428	172.557	208.256	192.184	221.742	221.89	228.392	205.805	187.318	205.764	181.38	102.602	120.744	162.833	223.668	182.135	284.957	102.795	254.04	317.068	211.333	157.027	171.111	116.611	402.764	167.468	313.559	201.384	325.638	164.529	178.715	53.8275	176.271	122.272	144.476	259.188	202.695	133.343	178.164	224.928	313.478	147.153	198.797
1553048_a_at	34.8897	118.399	123.534	172.267	168.535	150.77	92.3091	169.026	105.65	110.612	72.1676	113.33	119.302	128.809	118.724	120.482	56.5296	78.3313	76.183	96.3091	124.785	217.413	114.325	168.375	94.5837	114.167	150.654	88.7855	90.3887	117.078	327.621	150.99	162.737	235.636	76.9949	96.2734	86.0123	88.8573	82.9134	165.631	66.905	149.177	87.5811	78.2383	92.0297	127.33	135.265	175.031	169.212
1553051_s_at	59.1348	23.9476	42.7989	13.728	59.8883	10.593	13.5576	3.99522	15.3693	21.5699	28.4321	44.9205	24.7182	5.24841	52.4357	5.91067	5.35341	36.5929	18.1809	19.5837	40.676	66.9763	3.9616	24.0357	3.46603	11.3116	25.8294	58.0907	4.53066	7.34361	400.009	9.6531	71.5271	15.7048	6.5648	17.1537	22.4924	15.9747	56.6662	6.0627	43.9098	67.9183	39.0155	32.3748	7.82958	9.15404	36.7013	7.68896	39.1463
1553052_at	7.8903	13.7159	45.8576	49.5496	10.1441	6.46702	6.81499	9.75416	2.93621	3.97038	5.41045	7.55437	4.70758	8.82166	10.3954	10.2173	3.26036	12.7443	11.5261	9.86377	9.91423	45.6183	5.20288	7.64976	2.35777	42.0957	7.53207	31.0798	4.32038	6.12779	64.0584	7.4195	12.6161	21.3739	48.7266	2.81193	13.6225	21.9661	9.367	10.2101	18.7322	9.59649	4.5046	3.09504	5.95224	11.588	41.4891	8.754	54.2454
1553053_at	9.4779	39.566	26.4182	78.7681	38.809	20.187	13.3739	72.7834	7.3406	22.2602	3.55801	82.7552	6.63644	8.29983	72.1291	4.7147	8.57423	12.593	11.8999	12.1503	37.7376	15.726	3.11786	18.152	5.49552	142.276	4.54535	14.894	8.07441	16.1863	17.5044	6.29521	17.9686	19.5263	15.2561	6.56649	2.02566	6.36244	10.1013	14.1378	74.6558	58.8104	11.194	12.8143	4.63013	14.2945	7.44527	14.0929	9.32016
1553055_a_at	79.3518	68.1555	133.78	43.6374	148.58	110.863	33.0233	3.93411	43.8843	34.5838	89.4951	55.1361	68.675	8.10769	94.9695	18.2486	91.7634	33.7809	46.4068	6.49367	110.346	67.7846	104.23	46.0224	27.9137	64.463	70.5264	41.994	77.0884	24.2259	367.188	9.52335	186.619	23.7955	107.084	49.244	49.0233	33.7086	26.1064	36.3934	68.0421	10.504	99.6683	42.2603	27.186	21.1937	140.72	52.0564	78.7254
1553057_at	66.8695	94.4393	73.6453	51.8494	61.4903	12.3663	14.8627	60.9825	35.5563	41.4241	15.1359	16.1561	48.5996	6.84793	41.162	27.186	26.0294	7.00183	27.2353	41.9248	8.43194	86.2827	30.0919	26.1218	31.297	71.0978	5.67518	50.0305	29.3197	42.0668	243.925	92.6852	31.0977	10.6635	40.4838	33.048	25.3062	4.11193	4.01602	5.81043	10.8887	24.2456	27.8584	4.08629	7.80146	37.8767	65.6417	71.4788	7.8521
1553058_at	50.9383	156.543	18.2267	25.4657	9.32327	61.5161	73.1048	25.2241	27.4529	68.937	14.4381	55.9558	14.7322	96.9357	16.8895	77.6761	65.4362	28.8695	31.5181	39.843	17.9293	34.2439	58.4447	49.1775	2.8913	100.192	45.7387	36.6496	14.9092	20.3263	91.4209	16.8395	70.1625	27.3004	56.3203	74.0992	51.566	64.5692	9.24926	20.1419	19.4185	84.6187	60.681	47.8938	60.9966	46.7003	21.146	35.2147	17.7305
1553059_at	41.8909	29.9265	2.87614	2.60909	14.7143	4.1159	13.552	13.5957	3.84336	5.8394	9.84845	49.0105	12.9167	18.9258	33.917	16.9851	10.9391	17.7476	47.9858	3.97032	7.99946	8.09414	28.847	6.22878	10.0472	4.23214	36.9757	4.49238	12.0873	7.22702	148.134	10.5077	4.04906	4.7045	18.2287	8.08213	8.1462	8.03545	7.53817	22.0466	34.7022	2.6855	3.46593	6.10764	41.4545	4.5011	13.3724	4.07544	32.9122
1553060_at	50.1167	8.62474	46.8411	105.221	77.4881	9.34945	13.6806	46.7995	54.2178	113.881	69.6118	87.0168	74.3856	85.2032	27.9045	50.4717	63.9756	23.6948	42.1466	62.4093	41.1633	77.4974	66.2866	104.901	50.7979	38.057	68.5757	74.9905	40.7903	56.4783	498.853	78.275	52.3852	178.016	69.3059	36.9407	64.2942	72.518	108.083	50.0814	72.6181	62.2461	47.3815	52.2903	5.14607	120.613	62.471	98.2167	67.3337
1553061_at	4.48221	8.17379	3.34856	13.9708	3.44539	5.65808	4.99383	7.11625	4.57573	10.2277	9.77097	8.23264	2.90169	6.06134	3.18931	4.94052	4.49795	5.92209	5.59108	4.25756	3.39099	8.47406	3.81641	5.67732	3.13866	13.0175	8.20714	10.8877	2.43833	4.59327	8.09071	5.38582	10.6846	11.8133	9.10141	2.94867	3.21137	2.4239	2.03255	7.95444	2.77771	14.452	8.61472	6.04397	2.44863	10.2848	3.06818	6.32823	5.4827
1553062_at	37.5917	228.016	87.1089	356.448	77.9405	79.8303	201.093	462.872	78.7069	268.917	49.3311	449.805	75.5951	230.888	54.4475	196.762	58.9994	275.238	7.701	366.627	173.864	345.614	45.5277	364.335	215.294	478.055	294.354	367.461	14.1625	417.426	100.86	384.284	207.86	468.228	103.697	364.913	117.025	394.018	139.718	482.722	7.65894	333.497	159.04	235.067	95.2563	380.179	117.422	486.417	101.462
1553063_at	59.4245	200.503	58.5774	66.9699	98.2089	97.6329	74.1504	102.427	89.024	126.147	84.3484	158.789	87.5182	49.287	76.1507	74.9538	115.027	98.7324	71.7942	80.9515	121.13	100.487	104.576	68.5344	81.6844	51.4496	49.4442	59.6829	64.2098	82.9609	186.947	77.9042	54.4204	108.384	75.1968	112.066	88.4146	52.7681	61.3629	132.115	71.268	77.3915	98.6954	83.4663	56.2239	113.003	115.935	123.985	122.812
1553064_at	45.2824	44.3259	7.27466	80.6128	26.1364	48.358	5.77532	18.2257	6.98737	27.5072	8.45892	23.3722	17.0938	8.41465	39.9894	7.66419	19.847	23.5897	76.6594	10.4554	26.8199	34.1426	10.6134	11.9639	2.72521	29.6418	8.65105	10.5899	15.32	26.09	377.181	18.3814	19.9204	61.9425	23.9133	11.2304	12.6248	4.71371	13.1143	20.1373	12.5553	9.40157	2.20958	10.2367	6.99538	9.06482	16.2681	22.8109	47.551
1553066_at	41.839	6.19094	30.566	32.5982	14.4139	22.4476	73.7482	2.84634	26.16	1.76204	32.3646	30.2395	8.33831	2.19219	24.6499	53.5943	33.3842	24.3035	35.9374	1.91806	6.2821	90.8975	59.4462	38.8165	37.3832	66.4939	47.393	20.6651	42.5531	26.5972	132.829	63.7067	41.9495	6.11217	32.9168	49.0065	28.8114	70.5948	7.16173	22.6024	37.0647	56.6415	11.8403	33.8036	9.56403	25.1941	46.8469	59.2988	51.1316
1553067_a_at	9.17823	149.354	35.6802	39.9635	13.0782	19.3562	80.7004	142.803	21.3652	34.3025	19.8998	43.4493	26.541	26.4428	42.4392	30.3149	8.38428	28.2794	31.8618	27.954	78.9627	26.7568	45.6938	31.0916	57.9369	33.9688	115.289	29.2065	54.4627	13.1345	28.3693	14.4401	31.911	100.099	31.531	20.5607	15.8817	8.20373	6.07138	14.6321	12.4767	26.4746	6.22325	11.0247	9.03007	101.243	75.0557	35.1695	17.4216
1553069_at	6.8186	41.5378	6.33998	58.2492	9.89336	52.2125	5.56852	40.0237	19.1368	22.4732	4.07209	7.83177	6.96253	12.466	46.8584	17.6743	6.38081	8.63649	41.3325	10.9287	16.9812	57.5921	72.526	2.9027	34.8674	9.92928	4.95326	20.059	7.56891	6.09053	86.6467	35.2015	7.46928	14.5706	56.0618	40.3829	8.59428	3.88561	24.2053	5.41721	4.16844	11.1045	5.62246	12.414	35.6859	27.2249	10.3722	5.32466	63.0529
1553070_a_at	63.5969	16.67	6.36544	9.16129	13.6785	17.8056	12.0189	80.1657	40.4761	19.9492	15.9897	52.5176	60.6253	13.8331	48.4717	35.0093	13.805	22.7128	16.7298	51.2121	26.9186	29.0243	67.4851	103.986	106.911	8.75111	61.7463	104.519	43.9652	28.4562	31.4126	53.4296	40.9258	46.3985	19.2578	14.4325	11.6255	29.8173	11.6404	13.6845	19.2351	47.4482	54.0911	13.2065	12.5042	21.5821	44.4873	28.7046	15.8058
1553071_a_at	3.05403	17.0502	2.72065	53.893	15.6657	17.1781	11.2733	3.06219	20.663	10.4741	10.1845	18.5687	10.5668	9.53045	12.8895	3.09787	4.15796	5.94322	11.9175	3.68585	4.97776	11.267	6.28434	15.3751	5.60886	84.1102	4.02543	44.738	3.93188	11.6829	35.5237	7.68228	4.27333	17.4565	6.0287	21.3933	7.17507	5.26694	32.7036	8.75097	44.6085	8.88172	24.5015	9.62833	70.6789	17.0856	41.8067	18.3459	16.4027
1553072_at	4.08009	33.0457	3.16235	13.6687	3.8693	11.9165	5.0859	14.5439	7.24289	5.68733	2.30924	6.57365	4.9788	26.4943	3.33698	13.2041	3.91887	25.5017	3.99534	3.89272	5.72619	10.1212	3.17346	12.5357	3.71644	101.929	7.57004	5.12959	2.61558	34.8842	269.11	72.1304	15.4994	10.3706	10.4451	4.72675	9.05282	3.96867	4.41028	30.577	2.52701	7.15109	28.3142	6.04433	3.54591	11.5862	5.51251	9.56204	6.19538
1553074_at	12.1692	48.2747	3.76461	6.51074	1.85865	30.4192	3.64972	13.9841	2.116	12.8291	3.20241	11.0624	3.4503	2.43898	6.70027	11.2015	38.7128	60.9999	17.4501	7.94196	11.5075	9.40137	2.43748	7.52731	11.8627	32.4261	17.3103	45.5393	1.46958	1.35113	84.5166	31.1117	16.641	26.3547	3.71515	8.31269	1.78417	21.9284	26.927	46.3884	2.98254	45.0421	6.18754	29.7724	11.3951	11.6963	36.1416	7.30008	4.04133
1553075_a_at	5.63389	3.21986	21.7087	8.7828	9.78463	1.77609	2.43662	3.22039	0.911475	2.31257	1.82709	2.78493	16.4531	7.29832	10.0929	2.62354	8.32161	10.6099	0.685301	0.542953	31.9563	44.5158	12.5895	8.77567	17.2085	2.41901	1.5964	9.54534	0.579987	6.03281	95.5964	12.2526	4.641	6.90893	12.9867	29.5372	13.0101	2.86216	5.98583	1.70887	14.2182	25.9778	1.54953	20.5724	30.3658	13.2077	14.3983	11.1446	2.87104
1553076_at	2.46158	6.58564	6.26882	8.8691	40.0976	2.02757	1.51446	15.2732	0.847152	26.6684	17.7345	3.70273	3.18328	5.24611	8.04437	5.996	33.7636	1.97185	57.4205	1.84043	15.7827	50.8176	4.14005	6.18236	1.64878	23.4934	24.0855	5.29279	18.9684	14.1584	37.1511	12.5419	6.91378	41.6362	30.5524	36.4443	3.89091	3.60992	28.8889	5.45902	2.74524	15.4185	1.42853	25.5989	5.01623	17.3672	54.5487	35.7417	41.6599
1553077_at	5.82956	9.85125	1.62107	9.35652	3.83609	23.8214	4.13387	3.66994	2.50919	7.11435	2.70346	13.8104	49.7513	5.45604	9.5443	9.42301	2.70195	4.50248	6.62293	4.60052	7.12639	32.5362	20.9917	5.01331	4.212	9.8075	2.60742	56.0969	27.9318	18.2614	170.402	5.30141	16.1908	8.88376	4.88267	5.09119	2.12135	6.19178	19.0082	7.76022	14.5521	7.2969	40.9093	3.88676	3.04533	3.30714	35.9618	5.80242	22.1549
1553078_at	8.28464	5.71371	44.8054	11.7142	42.1108	70.735	12.5995	25.3968	10.8937	6.16097	4.00045	47.7176	28.4034	3.42912	5.54401	5.26132	15.607	8.34198	32.1343	4.14221	5.7007	7.70673	7.04993	37.4453	10.4596	57.4381	4.17226	53.7559	12.8564	46.8711	379.428	22.5163	17.4421	7.7357	6.53935	8.7581	23.0224	11.3913	39.0947	9.56038	7.425	13.8556	4.8668	6.33584	24.1702	10.9896	66.9254	60.9508	13.7228
1553079_at	3.98109	6.61624	6.95146	17.204	37.4576	45.1833	16.4959	25.9431	42.8119	65.0211	20.5908	7.87352	49.66	42.9921	12.4392	5.9378	6.08303	69.4269	25.8471	7.10436	9.43174	14.2384	75.7023	32.8529	45.6577	15.5769	15.3244	19.0271	28.7727	38.6865	153.929	22.7925	34.6034	21.3065	32.1987	57.7846	45.0281	1.46988	2.06383	59.9024	26.0353	55.2546	32.7452	8.97484	17.9989	26.6043	42.8641	25.5222	59.6938
1553080_at	76.0034	93.2266	39.7922	66.9005	52.8104	30.4334	2.14642	30.2839	28.0694	26.0006	36.5956	65.7612	61.3105	23.2107	90.0565	35.0448	31.5412	48.0936	58.1375	54.1439	43.3862	49.3953	2.89164	3.31685	32.0922	52.781	67.6783	30.2153	26.1824	5.96142	575.592	32.497	9.21797	5.38746	44.8607	33.701	41.2375	33.7382	32.6818	22.3731	10.0707	27.9204	49.2538	27.6176	19.6084	18.822	6.13292	34.0281	64.1616
1553081_at	55.9766	133.339	41.5095	23.0314	9.93543	29.5468	26.5257	117.355	42.1887	34.6676	9.60559	95.301	54.7841	15.9101	75.7221	25.7335	14.5172	11.8935	18.191	52.5764	14.4718	110.539	27.2161	10.1791	14.3703	12.8766	7.05858	18.6761	14.1502	24.8938	314.694	8.40636	33.8412	29.9933	29.9791	59.2842	10.903	23.5737	23.6721	40.3253	11.7473	26.3651	6.19021	15.9915	12.8141	15.2219	88.0171	26.2371	14.4431
1553082_at	21.5278	112.853	23.7354	18.4288	14.2283	4.22095	32.443	61.6222	2.25251	12.8199	2.19762	23.5852	30.4522	40.289	17.9562	12.9723	2.68653	39.9205	10.7861	4.64886	7.57122	80.679	3.07847	3.82442	1.92295	69.0599	5.50892	4.74848	6.7368	11.1596	221.583	10.4631	7.41146	16.5885	4.45008	31.4038	15.8103	17.8815	15.4542	12.1455	5.71364	10.4736	79.2896	54.6135	4.59836	82.4209	6.51372	2.6335	3.32423
1553083_at	43.176	74.6428	37.3691	48.892	2.88752	38.9798	77.7353	59.4519	22.9254	67.8462	13.263	21.8803	9.93365	9.00786	29.4441	20.7758	35.3439	116.178	41.542	43.5952	6.8165	6.78059	88.9946	18.7527	58.3699	16.949	3.41307	67.9558	59.7679	62.1755	128.849	65.4713	64.8674	65.8569	97.5868	45.6191	6.62141	60.0336	9.65607	52.2303	26.3408	5.08695	51.5415	2.21156	10.1167	6.69768	62.6624	68.2417	74.4838
1553084_at	2.36053	7.29129	18.7119	11.2441	29.7067	74.8282	66.3661	27.5872	19.3403	2.59914	7.84595	5.47281	26.6251	28.302	42.0418	1.70191	16.7656	40.9227	25.0837	1.87039	3.03574	6.40912	73.0247	6.69707	11.4358	2.57531	24.6487	7.57568	5.0932	2.39599	54.326	28.7589	5.30967	41.9078	16.7267	13.5588	32.3699	3.94191	3.17404	4.18536	10.812	51.814	30.1766	38.4554	15.3429	58.7247	4.22296	16.6127	51.7241
1553086_at	21.0421	5.92844	13.1307	35.627	6.13066	7.40037	7.66564	8.62026	3.58559	7.0443	1.94146	2.08442	11.3321	16.9685	5.17665	1.77753	30.7546	5.17236	17.0009	3.50504	4.94481	11.5816	6.24567	17.4437	10.0904	44.2693	4.61443	8.82583	1.41414	8.62858	45.8889	33.4674	23.7666	5.0338	4.93783	14.5899	0.839837	4.47455	13.2721	4.86406	22.2598	1.31291	3.6524	16.319	4.00646	3.10558	4.31535	5.26795	1.96633
1553087_at	16.7701	17.2627	3.07259	11.8635	7.16909	31.1597	42.1022	82.2892	10.3223	41.3922	5.07251	36.2592	10.4805	3.0933	4.50675	47.9119	21.9692	25.5633	33.5789	14.1305	5.15801	25.0667	19.1393	10.3159	24.4444	43.6203	12.5759	16.0953	38.4079	70.5593	154.237	39.4928	15.8902	10.1789	36.6429	6.19111	5.36885	34.3498	51.9191	9.14108	43.3341	25.5652	42.7058	31.7006	47.1327	84.6074	37.4492	6.65577	14.5929
1553088_a_at	148.506	216.417	163.689	353.408	168.331	95.7913	180.004	129.693	96.5042	138.94	146.464	197.814	129.36	180.386	143.752	95.7959	113.756	198.007	105.978	182.203	123.176	124.115	46.6814	247.336	140.885	163.668	157.374	264.536	110.041	297.336	353.877	160.164	131.43	246.775	182.072	152.4	84.3515	119.162	53.5079	53.4663	66.3733	25.8504	150.321	166.88	141.013	141.171	175.625	141.584	182.187
1553089_a_at	4.25929	6.15634	28.5491	12.5741	133.555	231.59	81.647	3.68379	72.5594	82.9045	4.01999	89.6539	50.7229	128.465	33.7964	30.7123	3.35251	8.41205	6.45779	113.948	87.8056	13.3211	3.48038	50.5255	44.9096	152.812	94.2499	156.507	15.565	71.516	287.334	216.267	10.6441	3.98341	17.638	249.625	58.7073	106.292	58.2028	87.7198	28.88	151.99	27.4922	146.807	46.7602	78.1148	13.4209	9.59314	49.8635
1553093_a_at	6.14688	14.0376	3.60183	3.90273	41.0495	6.54939	1.81793	9.06996	20.7014	22.1096	2.29149	4.2535	2.18262	2.72871	25.9699	1.94663	47.0425	5.00354	1.95388	1.5568	1.33682	5.10443	27.8615	20.0524	6.92235	9.61857	2.30382	3.96024	33.04	1.6528	189.134	5.10548	37.0071	10.7672	2.68757	4.22786	2.72745	4.06966	24.6379	11.9924	1.54415	2.19311	4.95748	1.91491	2.67682	11.372	17.0521	16.5774	7.80466
1553094_at	34.5955	8.50075	74.3188	19.6616	12.974	54.8192	8.1659	10.9884	44.7581	14.7011	4.71174	48.5024	57.1394	7.99873	37.0169	24.7387	44.0428	5.45838	16.9749	16.0799	18.6131	31.7051	27.5433	14.7635	29.0225	23.5092	23.7421	5.87503	18.7638	11.0613	8.97297	15.6172	9.55489	12.177	38.616	11.3657	34.8936	3.44576	81.86	17.6038	9.15379	22.7979	63.515	9.22109	8.6452	30.9366	6.43168	16.1201	17.8605
1553096_s_at	190.046	293.175	274.177	336.334	507.459	487.275	435.24	344.735	488.766	277.632	299.588	307.816	369.635	306.053	384.678	222.259	195.589	229.475	175.794	399.072	281.786	441.142	354.152	296.675	285.406	325.591	220.627	381.329	245.32	278.448	1431.76	385.45	421.683	357.581	346.457	380.284	249.538	248.902	147.641	244.304	353.302	378.169	363.423	212.141	301.439	261.046	237.299	291.721	305.495
1553099_at	229.091	396.233	340.954	424.855	247.101	551.188	388.325	567.085	405.545	293.687	231.512	470.505	300.442	430.22	250.276	340.055	323.473	204.148	259.281	303.361	185.694	352.735	445.305	401.837	339.72	366.692	290.59	488.459	243.57	248.379	184.691	346.518	329.594	298.968	311.805	390.772	272.406	312.554	310.404	232.894	312.535	226.682	481.568	239.821	323.659	270.041	356.509	324.283	373.615
1553101_a_at	1204.77	799.175	730.881	834.669	708.783	443.627	1030.7	1081.85	803.407	1083.21	1175.88	1068.31	1048.92	864.064	1045.75	1161.14	825.466	517.775	832.277	723.417	1280.54	1722.22	1168.7	1307.44	367.978	463.145	482.556	529.824	1079.74	939.986	1095.37	614.727	676.833	950.934	784.284	689.849	817.393	848.432	910.398	659.622	739.593	1179.68	778.864	848.692	1057.34	592.872	1079.65	874.349	1217.75
1553102_a_at	353.925	280.617	609.13	170.503	594.684	672.424	192.628	259.254	275.726	226.38	458.6	381.424	505.549	397.458	345.46	279.091	266.639	199.685	304.284	181.929	350.149	339.436	1005	311.216	138.773	177.201	374.181	343.381	663.337	205.924	322.753	212.297	186.383	203.043	320.979	207.245	235.662	246.375	231.308	190.838	170.844	158.399	219.74	191.91	310.217	180.874	332.411	176.062	199.712
1553103_at	2387.59	2033.59	2270.13	1547.51	1959.82	1756.01	1355.56	1559.58	1794.76	1135.93	2027.16	1049.28	1771.27	1579.08	1788.71	1342.87	1866.46	1475.93	1814.09	1300.34	1759.06	810.574	1362.63	1020.28	1919.95	1994.73	2007.51	2013.68	1697.33	1362.58	273.009	1374.49	1879.51	1442.86	1773.63	1874.2	2011.76	1681.38	1939.14	1558.86	2551.94	1591.55	2360.36	1506.9	2514.13	1785	1770.46	1466.52	1801.61
1553105_s_at	506.057	953.407	748.807	717.639	444.317	444.301	553.175	708.598	5910.66	624.417	434.78	700.431	1098.43	684.878	632.021	591.859	888.45	524.053	844.407	523.224	549.871	856.412	757.85	594.633	900.889	872.188	781.696	617.484	697.226	601.16	1319.92	810.806	953.04	812.611	815.231	852.701	496.114	753.551	589.993	914.227	1151.71	644.335	745.602	375.423	449.571	546.085	1285.34	871.941	1345.39
1553106_at	516.572	509.558	542.589	400.216	305.506	212.477	307.878	513.296	392.656	388.551	416.409	357.317	440.138	433.699	447.012	468.231	294.202	359.005	435.661	288.59	421.028	476.212	338.538	645.664	503.543	297.848	398.377	419.387	360.998	463.787	249.799	429.373	585.515	589.042	420.321	372.358	448.664	398.508	166.115	305.056	299.886	321.083	297.399	413.457	239.979	340.76	461.807	491.507	587.874
1553107_s_at	254.057	437.053	348.374	521.113	265.887	170.101	293.599	245.287	243.524	282.278	241.214	323.984	217.414	239.032	170.614	206.98	105.838	142.13	98.1519	146.394	158.883	341.321	239.855	319.727	133.011	235.817	187.711	230.063	150.746	229.527	260.211	184.798	190.764	211.46	147.426	173.892	120.473	114.015	125.997	174.694	182.343	110.612	121.467	120.377	188.583	158.253	204.947	239.839	364.734
1553108_at	341.474	347.015	257.628	308.711	194.733	160.019	202.138	511.06	196.746	181.758	236.431	289.57	263.728	303.361	306.947	285.034	211.431	348.822	223.784	164.591	232.584	279.617	274.584	392.111	264.181	299.847	270.298	241.159	315.516	384.235	1088.59	303.464	480.01	426.073	287.798	258.309	254.27	290.772	166.128	388.552	289.367	346.127	212.536	326.8	153.076	264.376	370.305	435.751	392.755
1553111_a_at	276.323	255.253	317.435	341.213	331.066	272.966	208.441	485.476	143.831	413.914	339.976	291.323	433.656	397.298	285.844	429.011	355.808	326.275	253.415	434.743	313.751	261.967	219.176	296.702	255.664	377.159	324.721	391.436	384.33	416.94	1488.74	446.464	359.217	363.42	212.737	226.075	396.759	406.768	444.273	373.819	366.637	367.47	366.779	273.391	268.744	424.044	554.481	420.243	182.371
1553112_s_at	242.887	225.005	162.374	313.074	213.678	164.206	170.335	325.716	235.01	216.896	142.773	134.11	196.965	190.315	158.462	234.796	131.429	289.79	141.026	146.622	129.564	322.769	169.006	262.974	114.019	204.433	177.596	69.9626	211.477	312.149	141.857	266.67	218.005	318.579	182.193	229.494	193.575	200.518	93.8223	224.17	110.075	275.714	183.263	190.027	157.174	99.2386	197.686	243.05	157.064
1553113_s_at	401.88	270.887	431.657	430.158	431.082	403.027	295.788	454.753	428.247	423.645	298.376	374.995	340.946	297.286	310.018	478.213	316.424	590.095	362.328	421.103	325.779	238.971	269.679	361.816	577.809	405.278	447.125	446.422	319.913	520.258	555.662	370.829	350.212	351.304	283.875	394.107	538.212	523.026	427.51	486.307	363.514	476.218	505.734	498.886	510.822	284.115	388.156	391.539	173.87
1553114_a_at	10.8229	248.731	105.242	43.7735	152.119	163.706	268.283	16.301	123.06	21.0186	23.4134	85.7105	186.169	179.049	139.993	54.057	92.9034	27.2696	82.4726	80.501	206.465	141.476	76.8154	30.4841	162.85	81.3296	201.562	269.705	199.487	132.974	650.279	109.097	185.08	127.286	172.205	141.16	32.9072	90.7455	175.25	136.794	97.4294	17.9765	92.8102	174.133	148.204	183.886	73.2565	161.145	122.465
1553115_at	13.9162	110.355	17.0113	68.6067	18.006	19.8535	4.73908	15.6003	14.9917	39.1809	29.0687	24.8524	18.0172	15.3092	14.9621	21.61	6.49029	88.6362	22.1383	23.4396	20.2234	28.7786	20.5747	25.8806	13.4537	34.5045	20.1968	65.3472	54.4871	21.3886	102.719	43.4064	9.36227	38.9351	17.2365	15.0202	25.4017	15.62	8.09518	5.81044	83.8769	10.6332	7.29535	19.1643	13.3953	29.9338	17.4191	75.7087	40.703
1553117_a_at	433.325	366.886	710.335	451.969	397.089	716.027	540.541	366.099	453.004	703.043	610.231	401.215	508.625	705.907	493.239	489.111	584.776	555.644	623.132	533.475	430.252	513.241	593.717	416.903	445.498	369.57	397.511	436.111	793.034	907.155	466.299	566.509	574.59	647.054	579.894	662.212	575.574	536.22	500.637	530.295	663.541	659.268	659.397	611.492	421.699	339.073	587.521	612.726	609.713
1553118_at	292.809	887.039	469.369	979.446	437.076	577.174	573.72	1082.39	326.944	787.187	234.789	642.428	507.813	951.489	418.757	839.745	481.834	693.639	432.216	917.125	379.779	1098.26	606.172	896.504	325.09	527.355	847.942	892.73	626.207	694.06	526.365	413.649	503.885	885.117	310.764	501.37	379.926	616.378	456.176	687.307	565.601	801.833	503.91	643.51	337.752	447.528	469.525	666.839	449.817
1553120_at	45.08	8.03961	39.072	37.7555	2.11422	2.42411	40.8015	65.4843	2.37956	6.77786	38.4269	9.50801	46.5928	10.8372	40.6142	18.8161	23.2115	48.3624	24.7806	30.5505	50.3655	45.9345	21.1752	34.9997	25.53	31.1211	30.6593	49.2498	22.7011	42.9915	153.275	8.4515	13.9166	10.1051	43.77	19.7891	6.45786	15.2564	16.4589	0.592293	9.88987	48.5484	39.9574	31.3077	37.9795	57.0341	36.1138	45.6876	18.2698
1553122_s_at	154.389	130.621	94.2639	54.5399	49.5054	102.907	58.6378	106.861	89.4745	78.2761	108.617	80.6228	126.065	83.4681	145.527	75.7548	87.0532	94.7144	91.2423	36.9725	48.6134	38.9434	84.9143	109.71	147.888	74.5741	60.8934	25.0675	117.243	71.217	157.036	79.8243	153.597	75.1425	62.5576	77.9467	93.1037	71.795	62.914	79.1822	109.431	70.2872	54.9512	67.1413	76.2407	72.0477	158.639	107.751	138.102
1553123_at	87.3188	63.6556	55.667	37.0327	21.6092	87.4549	75.5835	111.553	49.9187	97.6336	7.63742	29.938	63.7776	18.9929	33.3271	44.858	61.4259	26.8801	32.2181	64.9096	17.2863	26.5189	63.2696	78.3363	80.6973	131.11	40.8791	62.3342	54.5118	31.1743	84.3442	73.762	40.1818	164.369	38.0985	33.5615	14.0717	52.0417	44.0702	40.984	51.9523	30.9751	16.1597	116.366	17.5349	101.115	44.9417	35.9257	59.4029
1553125_x_at	72.6999	54.1048	32.2679	66.231	152.413	114.716	120.549	72.8367	18.8429	83.7674	43.2103	66.0801	70.0488	53.8425	63.0466	29.2247	66.3658	56.5963	54.8713	82.6275	57.6044	21.5828	50.1757	82.1134	44.9688	82.3216	86.4815	69.0843	28.2009	44.4894	340.013	106.198	41.5188	127.031	68.8223	48.3605	39.5977	87.4894	69.6287	58.0962	74.8787	76.6695	40.825	57.7591	24.9011	105.121	22.0488	81.4295	91.0796
1553126_a_at	28.3181	18.7613	24.7885	45.4679	19.1684	27.4431	2.42573	1.71004	18.5514	2.04462	16.6127	22.6813	4.9442	7.17004	4.89103	4.49418	37.4381	2.95289	1.95506	18.5507	29.8711	16.6854	12.7002	2.2174	7.33502	46.6719	1.69118	1.83438	22.3635	18.7026	194.915	2.7372	21.6124	2.11625	8.09505	12.5012	15.0674	6.79694	30.0408	16.3298	2.67887	1.79874	3.03492	11.981	1.87396	31.4605	2.65062	3.21677	4.48356
1553127_a_at	13.858	83.5156	38.1406	5.57509	57.947	72.3435	9.48359	28.2765	22.551	34.4601	11.0501	10.8243	25.6104	4.11351	13.599	39.8047	18.1951	24.3004	25.8447	28.5694	14.0351	57.8796	8.92999	11.0861	2.73002	38.8979	53.6509	4.55469	31.6083	8.59084	17.3083	23.4149	32.4327	23.2091	52.2087	12.0641	18.8198	23.4054	31.6451	46.8121	27.0237	4.75716	1.79849	24.1718	7.78014	31.4962	22.2829	20.6354	3.99933
1553129_at	67.9926	99.802	82.2509	124.081	177.269	276.091	10.9287	81.6009	65.8509	47.5564	47.4679	55.1715	22.6388	252.034	53.0346	57.9537	57.7483	89.1415	68.8279	129.302	64.9647	178.252	38.2748	163.37	92.096	173.192	149.799	183.087	58.5773	243.264	196.697	2.8486	163.595	81.9029	95.4929	143.969	142.808	175.743	72.0785	108.969	67.656	60.3752	56.0791	64.0359	123.017	88.268	220.771	112.944	41.6882
1553130_at	61.067	91.5985	108.214	240.879	53.6735	10.7989	30.7296	21.4746	34.5958	225.759	65.8339	145.051	28.0696	102.222	124.715	137.307	140.805	255.2	53.184	122.814	70.6102	250.017	149.177	188.308	89.3767	278.413	163.555	173.034	98.9499	141.021	466.229	160.959	154.004	377.75	69.8266	22.1886	25.268	270.193	77.2443	166.529	79.6014	212.84	119.286	87.892	32.4427	297.396	61.9832	193.57	304.468
1553131_a_at	56.072	17.8753	12.1118	126.29	70.8512	4.98735	53.2516	140.217	58.6652	28.8438	29.2142	24.2313	81.5024	43.1025	21.0574	48.0055	48.3658	30.538	24.72	18.6393	20.7877	104.356	11.9836	58.339	15.7832	6.24163	16.5108	21.2039	15.3581	18.6128	609.38	16.6948	25.0373	101.897	24.5266	48.4096	79.209	42.3021	63.183	29.9355	10.4916	16.1718	15.4413	59.8781	13.3429	27.3448	4.19843	84.1145	97.9131
1553132_a_at	34.1741	215.96	214.889	95.4986	314.466	298.119	147.14	239.953	323.193	55.8974	219.54	178.916	298.81	307.61	127.761	185.184	161.012	90.3391	115.955	171.218	261.688	149.237	280.083	215.385	132.755	97.2409	231.335	265.862	296.538	179.155	891.381	176.205	152.96	156.267	218.733	204.243	94.881	266.996	92.8383	89.128	200.141	183.634	202.153	190.596	165.828	219.637	165.135	104.424	129.28
1553133_at	89.7757	149.177	93.4112	37.8806	106.221	68.0917	28.2389	81.7394	316.025	56.6152	183.943	50.0603	116.317	109.525	243.103	239.926	82.5388	67.7868	157.082	128.301	111.913	86.4898	167.204	47.9043	184.391	93.115	91.4731	92.5314	188.381	94.3467	273.368	130.168	114.802	118.136	195.472	281.263	217.171	126.045	151.899	45.7687	73.2792	98.322	179.277	159.024	197.679	194.023	61.3439	69.4941	95.0733
1553134_s_at	32.6529	6.23069	24.3791	1.69861	48.9567	51.1225	80.4256	53.7521	62.8779	4.68705	30.0987	45.9953	36.4623	14.4607	56.6056	50.3993	49.645	37.7956	58.2364	23.3911	49.5073	3.24612	78.6544	3.71328	36.6567	9.139	26.843	61.0821	44.2185	32.636	158.267	2.9434	32.8814	47.9841	46.7174	73.3692	48.4111	25.5148	8.7746	38.9802	41.4364	17.461	48.5498	43.6345	95.8446	90.8974	15.7755	4.26669	35.7983
1553136_at	91.9816	211.582	166.026	113.364	98.575	228.056	96.2017	126.733	128.899	108.426	163.153	196.533	56.8987	225.058	140.15	103.477	143.77	102.996	122.805	145.8	251.794	206.702	211.038	140.59	200.257	353.601	118.193	50.7941	167.486	234.166	540.856	194.807	243.789	201.253	186.186	89.9139	217.227	135.823	144.955	191.349	173.587	165.778	151.283	101.205	185.745	139.574	85.8337	233.889	124.595
1553137_s_at	280.082	199.304	209.599	229.08	133.331	193.201	202.42	224.108	201.733	141.842	208.031	324.027	184.552	402.661	265.914	338.471	143.243	202.927	135.373	183.947	318.803	393.719	332.484	217.801	158.494	249.023	165.837	199.635	160.219	275.991	399.639	229.776	248.402	171.953	153.338	268.611	177.062	196.756	211.121	183.155	174.907	208.735	256.792	186.864	164.877	247.025	217.696	205.827	352.485
1553138_a_at	5.78564	28.6818	53.5243	15.0285	6.47811	9.04106	18.3433	4.74636	4.64324	2.29814	17.9023	24.6549	8.42011	13.8915	1.54376	5.7096	52.7583	10.1591	19.479	4.33986	26.2682	7.74822	48.4296	57.5089	2.79772	24.3831	2.59336	2.44759	41.3063	10.7332	498.586	18.4112	46.3612	47.188	7.69612	6.65686	24.1074	2.72259	28.2839	13.4139	2.31837	4.17225	10.8407	6.86093	26.5485	35.3881	7.05881	4.6946	11.2696
1553139_s_at	131.272	92.8322	107.043	14.0981	43.9669	118.513	38.8157	45.7951	122.713	72.8042	151.728	105.6	123.341	147.901	117.531	40.5335	53.3681	83.0421	68.3183	9.93529	215.512	101.614	220.139	78.2599	165.747	13.2961	27.0756	9.77514	86.0691	10.2402	208.61	13.718	8.93616	67.7893	65.068	29.4587	115.776	23.1304	33.8164	4.22945	72.1999	48.0947	59.4807	18.9568	63.6424	37.8911	147.752	14.1578	134.147
1553140_at	226.402	267.206	123.244	200.937	119.213	149.802	145.277	153.612	147.742	109.503	124.238	130.252	153.19	90.0454	185.532	137.638	99.7344	147.745	79.4171	112.489	144.788	175.577	160.25	176.646	284.802	171.24	194.395	128.036	144.825	143.252	259.767	106.613	94.3205	83.8305	164.356	52.2777	163.236	159.181	141.931	147.045	154.532	138.492	142.589	136.687	173.655	87.8403	203.261	178.429	144.387
1553141_at	88.3033	113.352	118.516	114.757	61.8415	69.254	129.769	66.2455	73.7554	94.8667	93.1174	16.5616	102.2	92.9302	53.3665	42.7618	119.795	98.4454	53.3108	84.5703	47.2732	108.82	151.431	109.945	129.374	116.284	119.571	89.2841	101.414	110.984	366.778	58.2501	159.793	105.888	159.715	125.312	122.443	63.4309	65.6296	53.9382	66.1539	49.2093	83.7481	101.237	35.3394	79.2511	124.433	99.4073	166.366
1553142_at	145.79	72.0044	152.1	88.0295	112.699	116.136	91.3933	82.6009	95.5783	58.3673	74.6429	76.4078	146.857	77.6284	149.381	89.2082	137.93	47.5499	151.899	67.6502	97.4092	72.936	188.812	73.5887	127.944	42.015	55.0823	86.3127	196.292	62.3733	176.962	60.7344	175.821	64.7167	209.747	108.427	155.362	66.7571	120.593	73.8394	102.162	78.5792	103.993	99.0496	16.5358	107.257	210.867	95.6908	150.205
1553145_at	335.435	794.379	565.958	792.271	265.142	1127.6	431.021	856.402	503.608	699.078	499.933	1112.35	512.279	1010.37	413.793	888.3	544.436	630.753	264.518	749.947	792.219	712.58	462.342	1081.17	573.212	840.831	569.102	873.645	356.231	523.762	1055.67	810.184	636.115	724.724	332.528	374.786	529.079	742.593	416.657	1075.24	1319.39	830.952	769.556	563.319	407.974	641.775	437.358	1066.63	512.752
1553146_at	15.0069	7.76348	17.2936	41.7115	17.4977	28.9554	78.8775	13.2439	13.4961	67.667	4.78779	7.40979	44.8603	27.1343	36.8807	30.7294	55.9503	51.1244	21.8252	44.9353	36.1472	21.6817	90.6286	14.3515	10.2716	6.51148	22.382	14.1239	41.861	11.0669	195.156	49.2933	7.17586	87.5039	47.4825	20.5728	15.2876	54.9606	34.8314	53.116	21.0713	48.7372	33.4103	30.6187	40.0508	42.4376	8.53234	17.1631	52.3237
1553147_at	2.12044	252.159	7.2722	70.1058	10.8534	41.1816	11.9243	537.218	80.9523	92.782	4.34919	306.669	4.51432	855.619	9.14822	28.7754	17.6382	122.86	9.67356	136.043	10.7975	66.2579	26.546	135.776	31.217	116.504	51.9855	88.2681	6.04767	57.5558	581.762	141.821	9.27425	115.361	5.5365	87.2668	10.6797	282.579	4.06855	247.04	31.2601	73.4848	9.33458	31.1518	5.72742	37.2139	51.3866	159.59	1.17934
1553148_a_at	511.478	290.883	391.595	248.285	238.972	168.814	216.279	400.819	479.527	313.941	406.925	335.839	293.679	390.505	302.235	276.954	346.067	331.687	355.356	179.445	267.217	491.925	363.359	413.996	514.311	246.944	243.373	174.82	366.529	435.981	460.462	305.862	583.482	462.257	345.412	318.926	444.544	357.15	206.725	365.273	329.711	313.708	229.27	315.339	335.847	258.018	415.112	416.729	475.651
1553150_at	68.1466	54.9449	81.8259	67.8097	70.2849	70.2966	71.928	67.8882	30.6638	29.1483	57.8886	94.4038	70.2127	56.7552	40.0965	42.1268	108.553	87.8546	51.1007	50.7392	105.292	131.776	142.522	102.974	84.3347	55.2395	73.4306	27.9558	82.0328	63.2413	265.765	87.443	34.0199	80.8708	47.7447	35.9132	103.101	83.0491	18.1483	85.2541	47.38	61.2296	37.0485	57.9758	44.3769	51.139	102.459	70.5264	32.6646
1553151_at	1.20571	889.493	82.657	835.045	54.7952	70.5356	20.904	733.429	7367.93	873.942	2.92157	744.189	45.0039	1090.02	53.2557	1120.17	13.9856	307.177	20.812	980.863	15.3928	868.16	33.044	857.363	83.7291	699.221	387.367	574.338	33.0963	1003.9	1152.86	929.727	20.5057	955.566	50.8561	257.129	14.6392	803.732	26.3485	1215.18	2.08222	1109.69	18.4005	687.32	3.91557	532.644	57.6543	961.569	17.4456
1553153_at	125.766	4503.72	211.625	3531.57	290.589	590.751	78.0191	2349.72	15886.8	3287.4	78.3768	3730.96	100.718	3643.7	214.022	4394.66	65.2947	1147.59	127.91	4043.48	152.56	3812.14	115.298	2786.18	540.989	3674.28	1608.38	2328.96	96.7639	3912.06	1633	3352.57	283.473	3041.27	145.231	929.474	82.0768	2401.26	54.2211	4664.21	106.766	3615.75	92.9742	2234.36	65.8396	2257.37	104.804	3249.3	202.738
1553155_x_at	3.87864	4101.93	161.924	2265.01	205.445	557.389	148.856	2195.66	15350	2370.99	98.9522	2869.29	57.3213	2645.68	118.007	3573.41	68.6542	780.665	82.0648	3447.5	70.0761	2564.58	50.3627	2414.91	472.934	2503.72	1398.93	2129.81	53.1239	3088.97	795.008	2903.2	96.7494	2813.38	94.7809	654.006	119.956	2011.46	31.8423	3294.2	53.6911	2778.72	92.4009	1917.13	172.562	1762.97	88.6773	2603.39	97.3723
1553156_at	30.1502	11.5024	13.4436	8.69303	12.0958	10.2821	18.8516	58.8304	3.91539	3.753	20.3246	4.88605	4.28606	5.64658	3.0315	11.4014	4.58513	4.09335	5.43384	5.19967	2.8216	8.23188	5.24521	12.8877	4.63388	6.69928	57.5445	7.91014	17.9578	6.12636	100.219	4.95062	5.04841	21.5388	14.896	13.9246	9.4916	18.6729	3.70043	9.02392	5.74257	4.39428	12.8174	5.61605	11.2964	7.80283	4.47909	11.1861	18.2923
1553157_at	18.4954	44.5616	43.4699	50.5422	54.5556	33.2851	72.511	24.2978	52.2463	102.7	65.7901	116.916	58.9212	62.3044	53.8021	44.0044	67.4212	112.712	48.2145	95.1516	80.88	99.9406	52.294	48.4995	52.4269	94.9157	67.4962	36.3028	89.2305	76.6038	135.246	48.0216	100.656	132.554	98.2348	51.8327	45.545	27.6574	21.7114	87.426	53.3154	62.6004	46.1992	48.4605	42.0687	138.496	81.3633	77.1962	64.2632
1553158_at	111.092	75.0272	127.243	28.1246	145.77	86.3977	149.8	124.398	65.8855	89.8644	77.1429	95.1339	107.107	194.565	130.255	192.585	139.796	92.9721	81.8623	142.264	146.003	167.448	236.881	160.114	119.613	128.178	96.8554	157.345	151.235	130.932	192.815	172.897	127.685	135.238	160.393	83.9493	104.847	117.785	159.102	171.28	232.034	152.063	58.2884	129.384	92.5397	97.1428	203.466	201.65	169.76
1553159_at	245.717	43.4502	217.138	20.2544	211.068	79.2865	297.21	61.9856	256.679	45.0422	387.434	126.829	620.4	19.1935	505.028	51.8514	1154.68	58.5674	758.635	22.2714	451.302	39.9608	172.292	34.3155	854.401	42.2957	168.917	65.192	404.116	39.0335	317.156	66.7465	564.141	18.0723	505.057	5.97508	724.779	45.5328	109.247	17.9713	772.979	13.5994	383.843	42.0982	379.988	6.12991	849.545	20.6655	808.833
1553162_x_at	190.348	286.251	142.98	268.725	219.357	191.856	146.312	196.469	224.993	243.601	209.5	339.228	194.088	247.7	209.461	237.68	207.787	244.492	162.323	279.417	331.021	308.548	406.327	321.178	223.214	261.6	215.379	340.815	226.187	301.077	220.411	323.701	231.881	292.372	219.303	234.931	122.121	250.466	121.071	213.457	173.02	240.015	186.03	156.888	157.386	239.353	274.263	227.816	110.485
1553163_at	27.3438	136.567	103.431	43.1641	57.4224	102.984	25.0358	77.7786	109.209	47.2763	15.5228	72.1273	137.899	32.8684	58.6678	94.0916	46.3949	89.432	30.91	159.659	171.453	173.696	138.558	164.157	64.9712	118.482	61.0348	53.1788	60.6463	28.3597	30.2701	90.8065	70.9253	139.124	99.9731	59.0507	60.7964	53.9929	84.8944	50.9152	102.638	115.305	63.0304	80.1407	110.997	111.91	102.464	113.983	87.6802
1553165_at	155.167	250.237	247.422	118.446	184.377	388.375	181.843	196.211	145.551	139.851	195.774	181.051	261.477	248.933	170.51	172.442	217.911	208.526	170.321	176.879	252.288	223.718	298.963	201.996	127.549	275.38	254.513	239.803	371.95	182.321	308.073	257.775	200.319	168.847	192.139	168.221	155.703	175.726	146.178	236.068	228.783	197.336	227.249	202.529	206.959	207.779	175.81	192.076	156.218
1553166_at	50.9115	24.7523	25.7135	18.4151	36.7681	70.7373	56.5257	13.7823	17.4526	26.8203	84.9831	89.5255	88.6702	84.5717	77.1214	14.2004	53.6964	112.857	29.2338	21.9305	155.43	120.403	84.6984	8.24307	88.1501	88.5812	76.6335	9.29113	25.8715	91.0392	514.917	49.6224	122.352	18.6023	98.9482	7.71758	95.5288	38.4203	63.9263	7.61546	134.136	17.0356	36.2948	52.3024	79.316	27.9865	62.6758	20.1112	121.154
1553167_a_at	309.319	310.349	268.81	473.193	171.7	208.733	267.856	394.943	125.215	571.112	271.284	333.599	251.378	270.851	290.125	361.251	370.509	622.715	261.561	392.364	367.699	360.22	317.438	476.669	229.177	381.589	257.637	297.522	299.873	571.521	348.44	363.575	299.968	525.695	258.25	287.761	311.406	458.173	250.73	427.727	419.936	639.333	307.982	528.967	178.547	345.685	321.449	530.137	192.238
1553168_at	5.01862	18.9678	8.87293	30.6708	17.191	15.3177	19.329	13.3156	55.1948	48.2338	27.945	37.8291	7.35905	38.381	22.106	67.4839	9.04531	17.2679	17.6004	13.7078	13.9235	31.6114	8.96548	19.8544	18.0558	65.9805	20.3671	14.3146	13.691	27.4231	181.18	30.4771	23.5675	68.6328	7.42133	7.82146	19.6441	15.1761	8.41028	8.31229	7.76415	64.0962	67.9555	29.1224	6.46114	10.4536	19.8804	7.03057	16.6613
1553169_at	11.7991	97.8491	359.572	226.744	343.074	229.201	128.458	88.7068	59.0411	237.411	13.1224	93.5109	8.19766	108.171	129.319	80.1491	8.03988	119.344	7.26181	91.441	20.9564	130.26	61.2918	17.683	115.495	54.136	298.234	170.903	346.528	192.913	31.8822	127.329	7.76103	19.1397	19.7262	317.649	28.3317	218.338	13.3042	107.495	90.3526	104.353	10.8645	163.983	149.87	190.979	59.8204	103.35	112.538
1553171_x_at	28.0329	89.5096	186.949	157.402	441.873	305.338	144.459	10.8857	74.08	217.305	27.4286	156.458	32.0638	77.8671	108.947	88.686	5.48429	117.79	30.2013	104.927	55.5617	77.9977	162.344	89.3264	92.8063	60.9697	330.179	109.228	389.064	148.538	169.647	37.523	71.2542	87.6233	73.2462	437.534	56.154	171.58	61.0264	112.218	76.2249	180.675	86.0456	139.052	42.8214	149.224	46.6293	145.087	62.9536
1553172_at	513.914	576.148	544.993	375.791	572.365	550.663	389.75	365.09	490.905	385.702	589.001	505.994	641.032	366.281	475.451	657.684	443.863	458.332	468.776	502.56	366.629	393.828	398.911	473.215	384.397	434.543	438.493	447.433	337.499	376.3	615.512	453.746	497.025	328.977	543.74	365.199	542.371	412.708	605.635	357.915	415.324	419.103	465.692	332.784	586.958	430.068	398.233	254.714	491.328
1553174_at	10.0343	71.9188	5.61126	51.52	28.823	61.8176	106.857	70.9125	15.8577	93.0524	26.702	38.2819	15.2281	33.8249	7.2698	51.824	48.8226	98.554	10.4346	74.4336	12.5518	185.096	25.0099	72.7891	23.781	53.4819	62.6456	34.1124	14.5857	36.8617	108.362	11.6661	80.6174	70.5642	82.5289	36.9947	81.1466	30.0687	9.58434	70.9489	7.28412	28.6114	16.0566	25.4065	13.5754	50.7972	61.6291	71.4343	62.068
1553175_s_at	78.8271	79.9418	40.9339	16.4085	110.065	98.4318	5.1305	68.302	13.949	58.49	36.8591	33.6059	18.2788	57.6418	115.832	46.0769	45.9033	4.16962	43.4091	14.8116	52.6923	48.756	66.2476	28.9633	75.8786	60.7213	30.9697	34.7976	16.5141	50.8161	132.139	15.3625	36.1775	3.47836	11.9155	41.4909	73.4425	82.5016	42.4172	64.0074	84.3357	43.939	22.1208	73.2518	46.9704	83.781	40.4871	32.812	86.311
1553176_at	78.9329	6.32293	55.829	76.0836	36.195	76.9372	52.3162	100.058	49.542	9.12575	40.9633	10.8382	57.4811	54.7339	30.7646	46.1478	16.9348	32.4388	25.6609	69.8744	27.1809	46.9874	33.8751	21.3087	54.8176	4.38846	48.3231	13.9118	56.0028	57.1241	110.724	34.0197	34.1587	39.1576	3.24772	46.1321	12.9825	26.3878	10.8448	44.4625	56.9586	51.119	43.9307	69.7779	23.808	16.5646	62.303	31.981	46.1968
1553177_at	229.852	106.881	132.441	29.9333	115.372	117.863	63.9357	67.6251	82.1711	37.352	143.075	68.7951	91.8774	41.6516	67.8057	34.3509	98.2156	49.7739	173.103	33.4348	166.946	74.8055	90.0358	70.0909	76.3216	43.7147	2.81729	4.04216	95.1853	54.2248	141.391	57.3205	129.419	57.8079	87.6289	60.8731	78.7888	79.846	73.0002	43.6751	102.821	78.4233	74.8817	60.3995	45.5344	35.7155	154.384	59.1288	94.7186
1553178_a_at	12.8374	76.5602	106.591	122.083	77.3833	129.359	154.519	180.334	61.7766	125.982	64.2773	119.56	131.24	96.0292	63.4616	99.994	50.2458	80.7121	61.0649	149.479	150.69	34.0132	60.5296	138.096	104.322	67.1642	143.903	137.175	66.9861	109.7	477.013	164.64	121.912	76.2445	96.966	105.622	105.455	148.481	99.4513	115.285	44.8732	138.259	78.6926	19.6535	41.3367	154.994	122.592	133.525	68.5061
1553179_at	38.5371	159.628	97.9835	3.23945	15.3076	158.288	64.1758	15.8044	2.70047	40.6726	4.5985	15.6014	5.62362	13.0348	4.56651	62.8453	10.0985	53.8616	4.34427	85.3489	6.47523	14.5939	8.79927	67.4938	6.60356	89.1019	60.6749	145.714	1.95715	35.2808	10.1257	137.86	9.05543	93.5763	4.85631	55.6025	2.1489	48.322	11.3483	64.6383	4.35959	55.1363	4.48406	71.5468	36.71	113.135	6.28758	105.713	12.461
1553180_at	13.3736	101.515	14.9253	3.19362	59.351	65.6759	35.1364	5.84582	0.700091	41.2469	29.3041	20.4523	19.0634	15.3589	18.4474	40.2226	19.0094	24.7477	13.5944	46.1205	12.6441	39.0081	14.2113	52.3954	6.63912	19.2156	58.8392	13.7102	2.3021	21.8849	92.3828	76.5032	1.85749	69.3803	3.00089	18.7527	0.793464	24.3276	0.672571	23.7163	3.59206	42.6655	26.219	27.3999	12.1559	69.7098	3.15993	39.7225	29.84
1553181_at	79.7295	192.995	17.8111	95.959	95.0098	45.4119	69.5596	169.835	134.743	183.251	71.7828	156.32	81.1061	135.647	44.9672	105.561	58.2471	161.945	90.0143	164.102	66.0898	105.182	76.471	172.212	76.3704	277.817	101.437	91.7043	80.1564	211.121	264.959	93.379	111.99	231.923	100.586	103.97	44.6557	141.351	70.6765	139.558	51.0663	167.48	14.5377	121.545	80.5329	198.381	152.349	105.036	164.87
1553183_at	1.17176	37.1756	39.0716	3.41614	2.86207	13.4976	1.36658	7.36066	44.3758	10.5125	0.984591	7.26592	2.55455	4.91848	2.22512	23.3809	1.42511	1.59117	3.11094	5.1875	2.44308	34.1576	3.72704	2.96953	1.04254	4.46376	2.09335	8.58809	7.19111	1.81713	86.8794	50.7815	1.20076	5.7961	3.17334	23.8156	2.15222	39.6852	26.2117	32.2143	3.31405	4.62794	2.81313	20.8219	20.0702	2.3387	9.57915	49.5603	23.8782
1553185_at	3707.76	6387.46	5281.3	6462.8	3516.11	4512.08	1839.51	2845.6	2757.62	4828.42	5773.38	3932.82	2941.75	3591.13	4355.59	2566.78	3511.64	2243.12	1982.31	1356.52	4716.29	3628.49	4530.98	4124.04	2545.46	5974.36	3134.15	3492.34	3219.87	1448.86	1212.18	3232.9	3759.04	3412.51	2696.32	2234.58	2422.74	2971.81	2754.84	2934.18	3730.32	1846	2972.27	1836.62	4678.78	2213.43	3612.83	3361.06	4819.08
1553186_x_at	2084.93	5930.38	3215.3	4779.67	1795.31	2299.89	2002.6	1832.21	1525.8	2395.08	2594.9	2031.25	1929.39	2366.87	1707.52	1364.09	1910.16	1412.67	903.09	858.672	2245.02	2023.57	2327.48	3127.26	1875.21	3943.67	1887.7	1996.37	1598.31	1363.05	3580.2	2152.78	1836.75	1620.56	1566.74	1097.06	1685.77	1284.84	1506.11	1494.06	1786.51	1084.07	1567.34	957.097	2306.55	1734.57	1687.83	1563.22	2525.09
1553188_s_at	8.01437	9.75677	46.3134	18.4587	14.0606	11.9082	9.76426	7.60957	7.23419	19.941	4.78503	80.8371	6.02011	5.47402	6.65123	17.6476	5.8921	3.92813	2.122	6.50414	5.90202	9.13391	7.7014	56.0031	2.4789	13.545	5.69311	5.64381	4.83643	50.6292	115.714	19.3608	6.11602	9.0006	4.61952	2.66939	1.64058	5.58357	1.9946	7.28586	8.19688	2.59192	4.37024	26.7207	16.9322	6.86481	3.62173	37.1423	7.25671
1553190_s_at	73.7289	166.688	77.8174	176.29	21.2103	21.4737	20.5178	194.042	150.779	150.949	14.5815	157.656	138.44	101.625	69.7058	140.359	11.7112	118.53	65.6654	98.2757	69.6278	102.956	99.204	140.062	75.6655	122.001	86.6645	172.925	73.777	158.949	163.005	115.955	103.354	166.381	123.319	19.721	100.927	63.1244	59.9101	141.893	75.7478	153.343	81.3243	65.3277	100.549	26.2987	100.097	138.275	96.6333
1553191_at	4.12127	52.1395	32.0882	26.7453	41.0604	4.00258	64.566	62.1363	6.33742	7.03343	3.8264	17.5368	25.8376	6.30277	1.6909	16.7951	12.328	4.80984	0.839274	17.5268	3.71717	61.867	4.67319	68.9716	22.6407	50.8365	39.1455	17.1626	17.1536	33.1224	235.72	6.23506	32.781	67.2425	4.43644	45.7403	16.2276	16.1217	1.31927	2.04772	1.72341	33.8726	11.6156	22.4162	14.0097	7.76087	43.9811	8.44712	45.0716
1553192_at	163.385	169.314	129.434	115.986	72.7769	147.799	87.4339	216.943	71.4261	113.455	96.0433	218.282	152.466	186.112	178.431	163.622	142.652	80.5645	78.1602	95.4885	199.58	142.359	153.043	233.385	182.535	140.244	123.344	221.19	72.2862	130.913	563.225	133.193	109.965	138.592	96.063	78.3665	177.721	242.661	125.76	183.566	117.977	97.9612	124.961	153.878	75.3493	112.321	164.014	209.203	148.282
1553193_at	119.66	217.467	134.939	258.126	130.546	99.5081	138.032	186.679	72.8971	69.022	103.432	160.285	163.074	127.426	125.083	131.734	82.9895	58.6388	72.384	118.06	160.842	182.929	129.374	147.297	145.556	157.918	148.053	132.941	96.2486	120.617	294.913	130.027	158.629	100.528	142.573	114.249	151.109	140.316	160.371	95.225	94.3634	226.911	142.855	49.8274	110.32	137.378	170.839	153.341	100.652
1553194_at	130.977	74.5715	80.1822	9.5571	72.2881	145.569	237.777	112.184	18.9572	36.3065	140.357	33.4977	18.6729	59.3544	30.5678	94.598	30.4705	81.5198	54.9468	96.8284	50.8328	176.798	49.2951	104.492	76.4836	113.183	87.4346	79.7029	47.1966	198.761	300.121	40.9257	3.98648	57.015	57.2916	129.607	207.97	89.3938	1.83073	13.198	58.4971	66.9685	61.3679	84.9251	76.9694	65.2325	65.9625	157.511	44.8965
1553196_a_at	5.39177	5.42989	125.864	25.0596	7.42178	54.8623	18.8277	19.7859	2.26753	12.3071	9.61136	8.73916	90.2105	3.07903	9.0291	1.28818	8.09449	10.4684	36.8494	7.03564	2.0516	15.2077	58.3339	7.6589	4.9561	6.79881	10.7158	9.14991	136.285	1.66158	188.891	18.0957	16.8811	12.9347	10.0055	6.56877	4.94406	5.56555	4.02344	46.3611	3.6243	6.32749	3.74833	7.58503	7.69151	8.95745	8.42756	11.8648	8.07923
1553197_at	41.0442	6.81662	4.46767	113.181	41.7563	2.32269	19.5377	7.15478	25.6437	31.4135	35.9133	39.9639	31.6145	7.69705	7.13135	49.5277	21.7746	43.8669	4.05401	22.6249	29.3453	30.3444	12.4786	9.15691	23.7656	3.30873	69.3766	49.9746	6.47212	43.4663	462.367	5.87284	6.51688	7.05587	22.3639	6.86078	16.168	9.06439	13.5597	4.33448	1.68213	11.2189	3.82851	52.9959	6.5189	9.69176	42.5573	55.8586	4.8884
1553199_at	0.520632	3.02099	35.3127	2.15298	33.4383	19.8593	51.8974	4.11356	13.2466	2.612	2.42165	0.467385	0.696024	2.48864	27.2674	5.59124	6.81595	30.2695	0.910214	8.88778	6.99668	25.3894	3.34032	10.3307	11.8657	26.6839	6.80551	11.0785	20.3854	6.48323	83.2908	30.4702	3.11184	4.13432	4.42052	1.65431	6.78505	12.4944	18.4223	46.0819	7.75029	16.8078	44.5102	2.9506	8.565	5.88432	0.909458	11.7444	72.0499
1553202_at	7.6426	27.0357	2.96239	71.9039	5.2432	2.81689	3.75872	57.2632	29.8673	71.5939	21.2554	10.0152	52.3509	71.5648	29.4989	82.2996	1.43429	3.92708	2.28981	28.0885	26.2666	33.1853	3.58048	68.757	4.49377	66.8598	67.6985	14.1507	23.0744	37.9977	355.498	51.0248	4.5181	93.3832	12.4803	13.5309	14.1679	52.4904	41.3645	62.1811	19.6457	62.4812	33.8364	42.0697	5.52991	2.63662	3.2868	21.9321	61.5759
1553204_at	48.0607	73.9868	116.138	94.58	127.84	123.746	65.9322	31.4627	89.0971	70.9671	43.6459	114.216	78.8486	54.2688	74.4835	102.104	36.8698	123.711	66.1532	99.2212	83.5275	128.084	58.8713	119.633	67.796	93.261	92.4874	159.26	81.331	109.172	234.696	113.45	163.505	172.643	103.474	109.137	71.1345	65.5696	74.5083	103.856	104.59	13.1385	44.2877	47.3886	100.248	110.872	90.6582	58.3367	58.3826
1553205_at	118.873	254.365	109.949	271.221	202.91	222.674	174.963	252.973	135.381	251.1	94.577	219.66	156.43	208.664	278.397	192.852	216.609	130.853	159.415	252.401	217.41	250.268	252.641	159.087	236.144	339.266	229.288	301.135	231.796	217.158	285.29	104.727	155.257	286.492	249.887	230.357	210.585	205.804	162.721	154.634	199.927	135.166	219.857	161.309	142.565	192.542	246.643	166.429	170.514
1553207_at	97.1624	81.2845	50.5145	119.265	96.6791	9.29015	104.498	49.8517	58.3817	70.2172	29.2808	60.3543	49.6864	80.403	66.9674	74.7588	84.8964	96.1578	52.6557	109.337	37.5446	90.3104	19.5294	41.8941	130.075	211.249	98.9853	87.1819	57.0852	50.1885	309.652	70.5897	90.0234	207.408	89.7795	43.4128	53.2587	39.9797	52.1063	53.5239	45.135	85.348	138.784	12.1866	84.9058	136.016	41.061	70.1875	62.7697
1553208_s_at	52.2037	3.19991	56.2736	59.4222	5.30964	18.8824	56.7338	3.98522	74.8154	67.673	59.6418	38.1731	92.0953	19.1489	5.8845	79.2224	38.3428	87.3583	66.28	73.0099	70.3775	10.4423	64.1304	99.9257	59.7247	93.9288	36.0483	79.3722	85.172	71.1159	197.978	35.4736	96.0189	149.68	32.1031	14.3065	47.3249	69.6021	28.3434	43.3047	50.6237	91.2137	77.087	72.1632	23.1569	26.0936	77.272	72.9082	32.4096
1553209_at	22.49	109.065	57.9442	79.0022	9.24397	8.59566	5.33048	50.1854	41.9541	28.2262	37.0092	16.3748	18.8492	6.70602	19.9327	44.2652	56.66	58.6377	15.3909	16.643	35.4998	76.2521	63.9452	23.8887	57.1476	17.8612	6.8389	33.9567	67.9017	9.1536	446.405	77.8943	71.1891	64.6483	42.8073	1.87305	2.93714	33.4534	33.0353	2.32427	49.6461	35.5554	63.7568	32.1753	44.0293	51.5419	40.2233	42.5915	20.2793
1553211_at	49.8904	11.965	6.16663	10.2883	52.4626	8.65858	8.95847	7.15006	2.49831	21.1823	1.23747	12.5716	2.78831	27.7135	5.70232	1.24623	7.48817	57.3643	1.69969	3.94775	28.5261	25.0826	12.9196	6.94392	20.9824	4.6946	6.10724	2.69644	3.6223	32.6025	32.7522	7.42263	5.93207	25.7796	11.1306	3.54343	2.13347	10.7282	21.079	5.29251	3.33163	3.7088	2.72934	1.52112	1.42326	47.5063	2.74475	7.29048	1.84191
1553212_at	66.4095	64.252	78.8166	47.5803	23.5073	112.786	141.097	120.018	38.4164	133.649	69.1929	133.529	61.7872	98.1458	72.906	60.0507	26.0269	31.1292	66.0268	96.821	105.385	24.0326	18.6236	22.39	72.6579	100.582	41.1331	20.1346	68.881	36.936	275.918	81.3591	107.076	108.665	93.2662	48.6417	59.0233	34.7687	19.6102	43.265	37.6052	68.209	69.0886	43.6692	59.8063	126.69	61.9519	79.2569	59.8856
1553213_a_at	1.30802	8.54532	4.21473	130.343	5.40243	1.89206	5.38116	6.07563	0.949977	2.81895	8.49272	10.9235	6.94921	3.59395	2.17057	2.43339	1.56109	2.63332	6.04986	1.85774	1.4805	4.76338	7.35071	2.89352	2.74957	10.3825	17.3157	8.52498	7.26279	20.2395	39.4271	8.40099	7.3105	5.00778	8.19942	5.71478	8.45748	2.61215	15.2446	8.40621	2.51159	2.55775	4.96701	40.6673	8.52496	10.1059	3.64437	15.7914	6.50395
1553214_a_at	40.9824	109.427	63.8167	35.7328	71.1197	71.5263	27.328	23.2549	7.83793	34.951	42.7565	22.0666	43.4999	5.40906	37.7172	50.2893	19.8054	3.04438	8.82118	36.1113	45.2938	13.9099	40.5555	28.7619	44.1583	57.173	43.1653	16.5942	17.094	32.5146	333.967	45.6715	73.0488	45.5464	41.1759	2.24871	40.9142	38.4221	30.3451	2.46435	38.1964	40.9057	20.0444	29.7415	61.0344	27.6579	83.8362	26.44	67.3768
1553215_s_at	122.831	149.297	96.2977	15.4111	24.0437	75.0761	26.432	45.6145	6.78354	14.865	37.0585	28.1398	48.8466	97.1848	113.867	58.1356	97.6698	34.4039	33.1344	21.8136	12.0915	37.9195	84.9157	35.2608	54.2254	129.198	76.2127	93.6884	35.5733	58.898	66.8196	104.165	82.1563	47.9147	26.7839	63.0996	66.1837	55.0442	68.5127	61.3895	51.1571	68.295	42.3456	9.02745	77.1476	59.6949	54.164	28.111	80.0405
1553216_at	119.928	57.4132	104.212	58.6583	102.463	71.7556	92.5315	126.041	65.0273	63.9765	129.511	95.1544	81.5678	117.112	193.298	65.2866	135.494	54.4814	96.0646	61.6866	123.957	84.2604	161.965	102.517	109.317	60.0971	88.6173	114.792	115.686	56.7799	210.986	88.0249	90.8731	76.8152	101.723	75.8171	110.97	54.1007	107.4	76.8114	154.415	35.5851	113.122	46.4586	93.9125	47.1384	135.602	92.1633	154.048
1553217_s_at	125.63	109.909	170.714	70.8238	134.902	95.3225	102.324	139.113	68.1827	124.651	126.987	113.662	141.016	166.005	100.924	92.0059	117.756	126.439	108.187	61.174	153.98	112.233	133.61	109.926	53.1448	148.63	110.137	127.79	95.4697	89.5511	282.428	94.1004	142.276	160.023	185.381	80.2024	131.936	122.193	88.0105	96.2193	163.403	98.6909	166.031	110.292	64.7889	55.4933	163.597	91.9935	162.477
1553218_a_at	610.524	982.596	647.628	738.441	883.956	1237.06	700.241	866.832	1020.39	609.698	877.465	885.275	785.817	940.279	825.782	717.444	733.391	749.248	612.819	703.489	924.768	772.254	1065.64	710.475	717.812	734.24	900.587	823.279	918.5	725.394	514.861	881.176	902.406	737.608	873.862	800.236	725.661	836.498	839.074	776.963	1025.63	696.736	1095.36	651.793	627.48	523.75	879.47	805.662	769.559
1553219_a_at	36.3235	75.9968	32.206	11.2478	5.72901	62.5854	5.68825	42.0737	73.0951	56.1735	55.1651	24.1821	71.2659	57.5408	55.6538	17.9517	58.2979	53.0736	29.0905	43.881	62.5181	31.5767	69.5923	11.448	3.15516	15.2442	6.48297	12.1523	44.8741	84.1599	172.704	48.2191	75.9669	73.8922	85.8608	120.909	57.0962	12.2175	30.422	13.7938	8.91171	8.657	5.38499	11.2513	72.5216	30.6586	11.9491	10.405	38.2509
1553220_at	134.028	109.836	98.9383	120.197	76.3846	111.705	87.7059	89.5388	128.3	135.326	120.409	143.911	99.3572	136.634	88.0158	165.381	110.865	157.104	102.131	137.952	92.1243	118.375	91.3433	141.171	103.5	169.199	138.202	140.148	181.892	92.4488	192.375	153.673	96.2342	138.666	153.191	124.919	88.238	106.476	105.511	135.187	120.47	183.984	131.176	142.644	61.663	171.99	108.671	82.9433	92.2532
1553221_at	165.761	285.392	97.1097	202.625	235.521	158.673	80.2227	269.589	116.284	193.817	123.052	188.491	156.269	140.217	112.04	135.087	151.28	163.59	165.687	194.6	66.8622	244.135	147.556	142.238	125.725	148.957	182.994	178.698	119.212	242.76	194.31	206.226	190.66	248.019	156.585	150.665	74.3696	114.35	205.209	163.662	171.212	182.776	150.998	157.804	125.602	174.805	240.356	127.18	232.312
1553222_at	24.0057	468.483	75.0275	400.677	243.213	158.046	285.346	367.798	213.836	321.739	217.103	428.563	194.285	262.128	179.678	282.034	159.019	316.106	185.423	303.5	418.413	485.105	213.167	490.765	188.01	273.9	310.285	195.396	128.324	319.773	217.996	237.906	215.331	486.88	284.086	236.018	220.013	299.73	71.4865	397.458	290.752	439.786	133.012	326.459	125.114	398.882	163.159	315.22	101.407
1553224_at	103.131	104.23	75.8849	81.7214	91.18	134.123	46.4921	43.8105	91.7852	125.483	102.51	63.5611	109.797	119.686	161.704	33.3231	62.048	82.5431	57.314	107.327	116.659	131.044	126.18	85.7204	66.0074	111.78	121.475	82.4245	125.463	85.6739	306.244	81.7946	146.129	131.654	110.488	144.494	115.079	91.3591	132.445	81.4989	55.968	71.2855	57.3727	65.0521	100.26	62.7576	160.715	65.2059	196.091
1553225_s_at	186.226	111.158	157.396	81.7623	162.848	136.995	134.222	140.814	241.867	119.412	173.133	112.729	156.699	255.687	183.294	154.212	130.476	115.875	110.017	128.786	180.008	145.504	250.116	190.125	98.8986	181.565	153.655	177.953	197.52	150.179	673.527	108.209	182.517	173.366	208.763	111.301	149.27	91.9039	120.449	106.929	172.855	167.177	192.281	169.381	112.921	120.427	193.918	129.418	322.481
1553226_at	6.35949	76.3496	6.46617	8.84118	6.87587	1.86051	6.26265	5.88478	5.03247	9.5352	19.395	59.4632	5.99987	5.72364	21.6533	6.31604	9.43902	7.01749	5.53693	33.1041	5.82137	110.844	4.57072	8.14033	3.26823	48.5749	4.55501	3.65814	3.62062	46.553	1306.47	59.7634	11.3427	110.716	3.6522	3.8951	11.016	4.81801	26.8976	5.25474	3.74657	30.7843	6.8853	3.49465	61.8437	6.42969	37.0862	45.0677	4.40671
1553227_s_at	343.471	289.598	355.402	289.341	276.533	356.811	205.271	324.275	223.417	237.13	209.3	337.209	273.733	372.118	289.355	300.453	314.49	222.221	221.209	288.997	307.975	234.047	311.698	333.818	206.438	295.067	206.516	197.138	292.316	312.904	1093.19	275.918	355.805	360.825	361.154	400.149	234.495	271.933	226.18	314.388	334.181	269.885	282.359	271.914	265.371	243.413	378.606	342.988	270.242
1553228_at	95.9699	69.9377	45.2143	83.8983	46.5165	58.62	61.37	49.1052	44.6532	57.1981	84.4208	49.3287	97.7997	48.1991	95.0131	85.8597	158.777	24.364	98.1011	43.3067	94.955	89.8786	223.822	81.9456	48.1149	80.7267	60.0199	45.2828	64.4166	54.1216	873.253	61.3051	112.455	77.6282	153.811	56.5676	86.3545	37.2029	106.493	90.1093	101.158	91.1019	114.584	79.7224	35.6113	53.5115	174.588	69.0049	168.922
1553229_at	59.7054	85.2835	76.0803	93.4975	126.47	103.641	96.8775	128.673	64.4752	154.906	81.6666	156.799	181.321	196.372	160.083	87.8392	109.014	176.739	92.2168	162.73	166.767	106.287	154.246	111.248	81.6132	199.845	118.903	145.455	113.646	60.0195	148.734	103.978	125.734	102.158	123.483	61.6579	108.971	143.206	125.853	113.542	157.338	176.863	90.1796	98.7793	87.7022	54.1795	176.922	122.666	171.726
1553232_at	59.8432	178.394	66.3389	115.233	108.52	24.9383	57.5249	123.058	65.7355	97.1231	44.9304	110.198	55.8906	82.578	57.3639	59.6873	4.92744	71.3367	58.8749	87.1663	48.531	104.981	102.584	163.44	60.5908	103.12	14.1544	64.8243	59.8552	95.2722	123.946	103.585	54.8241	135.068	41.4824	63.1067	32.0723	46.3265	38.6277	91.3724	20.9988	71.6232	3.95822	67.8259	13.1445	77.2959	59.9683	63.4234	36.5144
1553234_at	69.6698	94.5848	71.449	25.8873	66.5101	43.2935	47.4104	72.8357	21.278	16.2529	114.943	134.7	82.6044	20.6497	4.39782	56.6671	9.28459	76.8822	6.28121	32.9434	106.057	42.7784	101.356	71.2936	19.1115	93.3824	50.0206	25.7775	71.6504	46.6748	268.963	40.0221	87.3292	45.4359	102.708	40.0358	3.15815	40.1158	131.455	74.9016	47.6741	72.409	45.6578	12.5698	77.1798	87.6372	2.57462	77.4972	26.7175
1553235_at	25.1055	12.027	40.662	7.28098	7.50325	118.101	14.7548	117.774	7.5844	51.6394	78.1846	4.46264	67.1769	86.2171	66.5027	5.1546	35.0302	5.0216	44.9657	6.26316	12.4459	4.94997	12.5949	9.22737	21.9076	6.50332	31.0317	47.0976	6.34105	8.2385	122.607	5.33228	13.3898	49.2948	6.55177	41.779	10.6509	27.3989	41.2778	7.64959	63.5468	6.53227	26.1526	101.866	8.41952	22.0191	12.6218	51.5803	14.2127
1553237_x_at	102.5	30.3084	84.0058	24.9345	35.1521	132.309	100.782	119.951	80.3561	44.1431	7.99607	50.775	73.5652	10.7799	44.211	53.6511	35.6194	70.7966	57.5792	74.8676	65.8334	77.3079	52.5178	40.5341	80.5956	52.3545	39.599	66.5348	56.4382	72.9122	530.421	82.6569	75.2951	65.4994	7.53794	79.0868	55.5596	120.793	31.1988	62.391	85.7123	65.1847	32.6506	53.4677	50.1038	8.86136	82.5523	14.4647	93.681
1553238_a_at	176.957	87.903	144.167	194.905	122.197	177.416	137.557	143.196	84.4707	68.0387	136.806	146.318	159.792	112.029	55.4311	65.8063	216.106	30.7922	51.8405	124.694	91.9661	73.6774	135.58	113.33	74.6927	275.787	160.996	106.313	115.399	150.515	226.574	21.1995	118.701	194.987	111.698	137.408	83.9269	104.592	137.117	171.388	63.8668	117.688	101.257	131.645	140.267	115.162	285.102	131.459	153.155
1553239_at	186.957	175.239	128.056	206.679	137.343	149.081	165.62	217.212	183.78	124.624	125.245	198.916	68.9986	123.605	135.911	140.612	106.082	157.342	156.382	103.591	171.19	227.32	64.7107	186.03	95.6826	241.461	160.982	153.26	128.999	139.951	161.105	197.043	129.658	69.901	186.838	198.618	52.7647	136.142	55.7221	34.9435	41.2177	96.8451	84.3758	157.423	31.7373	110.83	158.87	187.73	104.865
1553241_at	5.47019	63.2667	61.4786	173.392	51.618	9.29936	56.3469	60.4456	46.1302	15.2753	5.83066	49.6545	11.8454	38.8006	8.15657	10.2313	12.015	60.1921	9.15577	50.8149	31.9371	30.6799	35.6241	50.2526	44.6209	120.467	52.6021	28.3591	52.0784	23.4701	285.646	59.4975	13.6864	98.5365	27.8912	9.48185	28.2525	74.2746	64.1329	55.4454	62.0185	52.9184	17.38	31.6502	4.95651	56.1043	68.2351	117.379	42.9972
1553243_at	1151.38	601.055	693.052	441.353	383.18	679.209	1042.2	423.119	2086.28	186.597	365.06	364.041	432.262	1188.52	531.291	322.781	376.582	216.364	514.674	298.774	296.807	444.805	164.479	380.397	522.12	875.193	335.829	437.892	568.827	221.93	193.849	322.196	311.573	177.94	540.251	278.809	260.111	687.403	449.483	455.84	347.58	211.412	694.918	261.257	379.269	352.745	425.578	450.767	1040.14
1553244_at	52.771	18.2141	27.5197	5.05181	7.11491	19.0718	4.41098	22.966	36.4777	4.56501	5.60978	17.3781	7.70019	6.5816	37.2291	7.80862	29.3616	6.12849	4.56356	3.7703	7.23058	11.0594	9.82326	25.8319	26.1756	57.2658	5.06721	3.06023	14.7276	1.71666	91.2397	3.28291	13.503	34.7625	14.8694	5.60301	7.55056	8.95373	3.88676	11.3471	22.111	6.16628	37.3711	3.36934	24.2609	25.2429	49.8369	40.1632	6.00917
1553246_a_at	74.0072	67.4834	20.9607	7.83184	75.9493	4.50784	25.7506	4.82661	47.9882	88.3799	29.9458	7.86511	39.1808	3.39517	42.5782	79.3825	28.2746	80.0208	55.8696	39.0919	22.908	98.9858	79.8612	5.55539	43.3118	67.9916	4.85639	7.10429	71.2383	54.3874	219.082	14.94	90.2745	63.74	37.2499	65.677	76.2202	24.2745	76.5391	31.5914	27.8521	103.628	6.92758	25.0903	7.91454	78.5694	90.3398	42.5211	60.9047
1553247_a_at	83.0598	203.743	107.453	103.578	158.509	154.269	122.581	247.04	135.238	113.333	77.7638	155.535	143.038	230.427	117.104	156.915	125.154	140.057	81.3104	149.127	159.308	91.304	150.136	122.174	137.083	154.933	183.976	190.912	82.1338	158.982	875.669	121.746	175.618	179.397	121.034	178.199	106.071	147.002	171.365	257.205	138.101	125.542	118.199	154.228	100.828	93.3724	158.011	175.913	161.53
1553248_at	121.168	101.199	120.116	179.992	66.1593	115.413	106.799	98.7049	98.7354	48.4897	111.986	95.0732	133.374	103.588	111.335	90.2343	106.147	140.774	61.0751	85.5319	138.236	191.805	171.268	109.272	71.2822	87.9999	125.892	137.846	151.408	97.3832	128.436	80.803	167.431	129.888	58.1105	104.878	60.1636	98.118	49.1328	96.8748	83.1534	93.1354	105.657	55.0624	123.78	126.379	122.88	131.46	157.086
1553249_at	41.4738	94.1196	51.1256	106.853	45.5245	94.7052	2.86329	14.317	1.86379	12.6443	2.46706	53.9597	4.26137	58.0667	10.1611	48.5928	4.12349	12.6226	6.78535	5.205	59.6567	18.9196	41.0416	48.0149	10.5597	25.7717	5.8045	40.782	10.4181	6.16816	56.7813	46.4831	14.6775	48.1203	10.8254	30.7327	3.10893	15.5236	38.9756	54.7632	23.6891	59.4668	30.8695	11.4755	23.3729	58.8588	6.37399	35.3623	39.437
1553252_a_at	271.064	115.389	199.492	138.991	133.067	136.171	188.757	136.128	208.704	158.835	233.974	235.15	136.655	83.7446	118.451	74.1249	66.929	49.9916	120.01	105.418	167.305	160.639	187.869	117.157	91.9385	115.021	113.121	133.346	184.492	113.233	313.616	70.9144	128.723	96.1533	106.049	115.458	131.964	136.994	114.346	126.955	131.524	78.4016	162.172	86.0914	125.957	74.8392	141.358	124.786	220.427
1553253_at	197.815	197.042	180.584	22.6187	141.26	103.345	53.3668	268.126	155.045	38.3272	92.9365	179.234	141.241	84.9283	26.4507	107.557	106.411	172.431	194.037	235.555	206.365	299.65	94.251	252.448	157.447	182.225	217.482	153.554	91.3715	92.6423	183.799	299.807	152.254	84.7516	160.413	95.5881	180.293	219.066	181.542	247.966	211.905	79.6346	95.665	25.4922	237.669	239.894	218.177	183.295	142.009
1553254_at	8.90351	59.5903	1.0962	69.5825	44.5729	38.1678	2.0849	33.1818	21.527	6.98704	5.56581	52.6648	55.0732	10.7588	42.827	44.2291	10.8312	38.0434	12.4703	58.0256	13.7413	4.16165	19.471	58.6442	18.4159	42.7479	56.4325	104.44	20.9749	33.6318	238.886	57.5059	51.8252	43.8336	36.0914	29.9618	16.4235	81.9373	23.3096	60.4621	31.6401	43.221	5.8375	60.4287	5.98766	42.3959	56.7096	29.2531	2.43203
1553255_at	22.3762	28.2017	9.5504	26.6469	14.9556	9.41555	12.2909	43.3524	13.3332	27.9552	52.8804	30.1363	54.6161	133.577	75.863	9.58737	17.2472	13.8076	19.9187	18.7646	31.6577	49.8913	126.102	24.9708	41.276	41.3083	13.3324	21.4333	16.3783	25.6388	231.98	24.5943	4.89407	6.64629	13.0279	34.3752	4.0952	6.47471	59.9156	8.6746	48.3664	40.5247	33.477	9.50634	15.2634	27.8027	74.252	25.4967	6.07707
1553257_at	11.7569	502.585	42.8669	140.499	109.452	111.097	47.3359	327.399	13.6387	23.5805	74.2171	419.027	109.916	391.815	16.0663	15.8744	11.7776	16.9676	11.6939	20.8795	86.8719	28.4921	12.8299	22.707	56.3735	42.7874	22.0963	48.6621	10.092	19.2608	371.577	29.8109	14.0572	90.909	9.25986	19.3245	14.9179	193.925	12.0403	19.7151	12.3699	15.779	12.1844	13.2397	40.4299	24.7951	24.3403	156.055	13.8711
1553258_at	35.3287	44.0579	18.9259	21.8366	2.0391	14.2933	5.56252	61.5145	8.02085	64.4922	5.60165	18.0576	54.773	3.83126	59.6089	44.7534	9.58459	82.7275	11.1804	9.66431	39.6959	9.75873	4.80643	14.1673	9.78716	17.2832	13.9216	38.7198	7.47743	2.96657	203.523	13.1962	60.7651	41.5924	3.60536	31.4456	7.66012	3.8856	25.8217	3.44251	16.9942	12.6298	7.20029	7.64985	51.8104	11.5253	3.88383	3.6604	4.36393
1553260_s_at	22.2711	39.7747	19.3302	5.98626	62.8759	59.4365	43.5695	1.92894	9.94812	8.67605	33.0258	19.9245	10.5669	37.9585	21.9076	56.6122	8.16022	33.4271	46.0019	3.4434	3.48439	30.2215	22.0892	23.7029	41.5477	30.2937	28.9228	29.1011	17.292	42.5634	239.019	33.1288	24.3409	28.7368	10.171	15.4037	33.0082	28.9253	2.20288	50.227	195.631	2.27387	24.2233	21.1094	28.4103	3.4696	94.9253	23.4451	38.4348
1553261_x_at	27.8938	0.771018	14.9646	18.4178	33.9665	4.79583	8.8975	24.7367	8.84076	28.869	1.38924	8.26426	6.1006	37.5543	1.60863	11.3124	23.8824	1.66311	30.7232	18.1575	0.279696	44.8982	3.18865	1.45196	10.1583	54.7991	25.3097	15.8993	9.79818	10.3226	10.1413	15.3363	18.4922	16.1804	21.1097	10.5124	0.211913	18.854	15.8492	38.7098	38.2591	0.777031	0.56227	6.9151	15.7908	34.9119	27.7749	7.80285	5.86706
1553262_a_at	216.057	329.425	168.592	77.3769	277.52	276.386	199.582	319.638	254.927	196.539	172.784	358.464	183.822	230.696	199.661	279.995	206.72	147.99	150.9	353.888	153.07	540.812	255.119	357.65	58.537	312.135	44.2676	121.66	243.001	66.2993	850.995	206.076	294.56	304.58	254.99	136.682	138.866	71.276	227.376	38.8307	232.452	203.961	244.742	263.596	77.3237	352.056	242.193	218.026	238.06
1553263_at	80.0411	185.859	87.9258	26.8409	121.081	158.737	107.86	180.723	146.174	219.465	69.8139	142.482	140.497	82.6528	108.069	110.746	155.822	36.691	72.4855	174.485	184.431	346.436	145.657	173.845	168.161	190.782	191.629	79.8965	100.582	134.004	632.735	169.07	140.844	125.763	72.6581	260.603	38.3672	54.5532	99.6298	22.6426	131.024	92.7625	114.241	82.5974	97.4297	157.046	155.656	108.301	242.75
1553264_a_at	16.3578	31.3744	12.1683	36.6936	62.7702	41.1917	68.5757	15.5505	14.8028	60.8494	29.5335	28.49	27.0268	50.7026	28.0735	16.0644	13.8817	13.3019	22.5722	58.2515	47.8643	50.1612	6.69965	36.5637	17.6257	15.1724	55.4328	142.279	63.3388	35.2569	351.033	111.912	24.5294	76.3033	21.8071	27.9146	41.7842	27.2648	17.8931	28.9379	12.767	70.9041	6.51022	103.565	13.5205	65.4147	10.3747	78.1616	29.3399
1553265_at	107.776	243.523	228.544	307.956	20.1613	56.8851	280.076	342.86	99.6947	116.337	88.5475	320.278	86.0974	201.717	80.9892	448.895	145.042	484.09	30.5409	292.445	90.3714	605.744	253.631	697.123	104.415	368.885	194.173	341.51	435.711	192.105	198.644	328.365	449.972	445.852	93.8464	215.092	61.3629	264.429	61.8663	403.026	17.6299	255.608	142.261	284.155	96.3565	274.029	268.174	609.169	50.9264
1553266_at	2.2385	2.56709	6.87094	1.55973	0.605261	22.312	22.4961	0.852523	2.37766	9.22966	18.8134	18.8557	30.554	3.01619	15.3395	11.7355	9.73148	1.07	14.0866	8.70847	3.10209	2.32876	3.92292	27.4482	3.69172	1.71171	11.0548	0.804935	8.35662	1.2905	134.051	3.97646	18.1353	1.31383	0.395062	37.3001	28.426	10.1048	5.71067	0.484714	21.8634	2.98789	1.73472	3.16902	1.14066	22.9386	12.9746	13.4022	23.8433
1553267_a_at	59.8775	18.2336	12.8641	41.1598	10.8612	36.8339	28.6956	65.2126	52.8998	2.38693	14.8688	81.8488	82.7082	43.3595	42.1292	47.6177	8.53923	1.78266	83.2141	32.1136	48.1617	53.5332	32.8775	12.1062	32.2239	30.6961	40.7963	41.688	4.47014	36.9377	116.478	3.45094	31.6445	22.8643	41.514	79.0128	62.669	2.3651	16.6529	65.6675	23.6758	16.8264	42.8412	61.9535	30.3721	46.6928	76.5323	74.7988	38.0631
1553268_at	89.547	68.7844	61.1558	13.6693	44.2696	65.532	66.8575	66.326	57.4849	9.00365	9.07795	5.19095	7.90332	58.1793	81.1668	45.695	54.1692	14.5281	60.9493	19.8147	12.0758	80.2546	4.6065	58.503	20.6525	2.5039	8.08045	13.1114	34.8025	45.6821	435.804	46.9662	87.4718	28.8323	81.3778	19.38	36.7044	58.6512	37.5897	65.1057	42.6185	10.8039	9.08365	50.3895	42.8566	38.6876	102.215	76.4839	69.3175
1553269_at	245.05	139.171	137.553	97.1924	95.8663	166.544	176.981	256.4	290.376	109.106	210.439	135.746	233.504	214.118	220.612	138.448	252.036	183.706	261.336	181.444	138.1	21.7443	168.804	72.0481	215.654	146.268	245.524	257.871	322.082	297.353	140.794	84.1894	140.428	133.23	204.161	229.058	371.806	223.957	272.572	176.475	314.872	130.712	411.392	182.8	88.7765	68.5542	433.403	379.841	103.787
1553271_at	72.9133	43.5998	71.9311	83.6855	145.481	105.281	107.282	35.4136	66.3335	105.617	90.266	71.8495	110.076	46.5215	89.9719	66.3507	133.609	74.1929	91.1391	74.6794	130.765	51.9872	93.8244	79.8316	129.175	106.26	68.568	81.8517	52.329	77.4165	274.869	77.5791	56.7634	73.7776	88.1547	75.8316	114.199	54.5767	82.1789	129.039	88.8666	140.737	59.511	71.8511	80.2371	63.7831	138.042	67.3517	6.09293
1553272_at	82.2674	38.2661	71.8942	67.0637	42.4328	18.8421	8.76613	114.459	136.04	101.164	23.4718	115.345	58.1464	77.2623	52.3438	8.14063	123.161	95.5872	73.9719	54.401	101.166	115.053	82.3668	84.953	31.4935	76.8632	43.9406	53.8868	49.3365	23.8659	141.02	32.509	51.4816	61.9548	89.8139	93.8431	81.5739	41.0459	50.6041	104.821	68.5151	134.555	91.9689	84.1576	18.3565	101.56	98.8687	170.516	76.5012
1553274_a_at	383.254	306.065	271.705	244.259	314.023	427.232	299.161	304.286	133.19	192.149	458.962	222.937	294.259	388.372	316.329	255.006	307.125	114.988	262.257	101.775	411.078	203.373	255.531	215.718	180.294	202.023	303.268	180.357	254.113	220.631	610.717	303.7	384.976	247.674	282.548	245.634	317.652	207.9	298.063	166.43	518.573	286.836	310.502	158.775	340.567	199.815	269.961	160.884	350.382
1553275_s_at	204.117	125.303	249.501	104.531	333.345	332.544	201.768	144.972	264.8	146.411	310.191	154.44	191.627	106.577	176.886	199.903	368.149	150.01	275.248	270.82	189.004	224.58	200.065	126.91	224.213	193.953	393.082	285.483	130.996	118.513	354.624	121.703	332.691	115.056	209.934	92.607	329.116	191.692	194.673	176.223	324.222	127.703	287.701	125.677	436.784	115.702	381.629	191.944	266.52
1553276_at	1.64687	37.3663	2.85402	1.83702	18.3405	17.3051	3.42813	23.3537	6.8609	4.90766	2.85801	9.35619	1.65957	2.68394	3.44205	28.1389	1.45759	3.64235	1.35742	1.44521	3.0844	2.55639	2.33659	2.36628	24.0506	6.52869	1.88361	20.2544	1.57879	2.95119	670.597	1.6691	0.630627	1.28744	0.912427	1.27176	1.5169	1.89739	1.1378	1.39206	5.3875	2.69235	2.22264	2.91283	4.8196	6.35317	8.54589	3.65871	23.9555
1553277_at	15.9717	36.2958	1.04569	32.416	2.53863	34.4999	21.3857	1.29289	9.07406	23.1817	16.8143	28.5626	22.1164	24.3002	26.7877	22.1523	7.80772	50.8721	18.8865	2.13807	47.1796	120.574	22.9047	12.7897	24.9829	61.0831	12.7531	11.7654	34.9282	26.8776	90.1427	29.2484	13.8108	47.5526	35.6401	1.96002	20.4824	5.40834	14.4678	25.6288	55.3379	37.0211	9.35275	1.35456	5.97572	48.3021	37.7261	23.2465	20.3341
1553279_at	669.176	160.707	243.893	65.433	130.459	87.9985	115.557	66.7107	135.421	71.253	455.093	193.361	193.115	107.175	275.529	38.8254	235.907	85.9501	274.363	18.019	567.923	47.9679	324.507	154.871	141.8	166.995	213.615	130.416	173.177	18.273	269.31	82.2366	528.755	35.3855	187.358	76.1725	372.435	107.078	391.595	173.516	450.788	81.1816	206.124	16.4425	340.324	23.4761	278.897	26.1669	603.323
1553280_at	146.299	166.378	98.8871	156.8	55.321	88.6073	103.312	136.528	61.0995	193.81	110.9	134.625	81.6547	124.825	106.348	169.821	156.197	210.469	128.983	119.722	153.51	159.859	112.52	119.568	107.009	189.089	138.287	151.066	175	225.11	243.07	143.957	164.087	175.872	145.091	195.199	111.648	152.206	130.734	150.142	121.924	199.139	90.7367	148.424	75.2366	175.062	143.82	160.946	185.102
1553281_at	5.34256	7.34393	8.21778	64.7508	10.5876	6.01898	4.50122	23.2031	40.1056	13.6336	6.13963	6.06396	5.3024	31.5612	10.7767	20.76	4.8873	41.1276	26.8881	15.8299	19.3339	8.94761	8.69999	20.3498	83.2702	37.5387	40.3395	74.3474	12.4251	16.1311	195.781	7.17894	12.6765	28.4484	16.5769	10.6025	7.38234	7.74275	4.0113	6.38332	58.7222	7.2359	9.41137	23.3956	4.05987	89.195	45.1366	18.7122	6.04835
1553282_at	22.5844	61.7085	39.6769	34.889	22.233	20.4619	27.6483	23.9427	68.7788	16.6311	13.536	52.8381	38.7419	55.8363	38.0069	41.5989	7.84251	4.34325	26.792	5.15043	42.0595	43.9697	40.133	48.8569	38.4099	9.7404	69.7816	53.907	32.4924	31.4127	132.962	65.2837	18.1322	65.082	40.2676	56.3571	9.54567	57.4907	28.1122	15.2123	7.9841	44.5264	58.365	41.3972	77.3736	83.4355	7.85475	40.2098	43.5928
1553284_s_at	51.059	57.7291	64.0902	56.5397	89.9027	55.7476	105.242	69.8299	53.3585	81.3607	72.0878	85.5712	110.596	57.0558	89.9685	87.9417	85.9841	88.0151	9.57681	44.7881	55.1309	128.7	160.601	86.575	94.7818	88.5052	72.1182	62.6578	81.2642	53.1982	298.382	51.713	84.0889	66.0436	79.526	64.7125	41.3658	58.1927	87.8708	49.0752	43.5886	68.5162	70.3991	52.6892	65.1888	64.0086	103.172	113.273	126.469
1553285_s_at	5.60906	24.6029	22.288	47.5053	39.3375	46.6099	10.4868	21.979	3.48674	28.3259	26.7597	17.5745	31.4268	50.7782	52.7918	31.2494	12.0817	44.0357	26.4303	44.4645	21.1772	31.4249	55.2485	62.9089	3.38362	3.24928	26.872	35.6013	78.5505	14.6904	180.74	1.35113	4.43538	35.7091	3.56126	34.961	10.4788	47.9224	36.3587	12.7097	61.9793	30.13	24.5119	1.98262	16.2825	10.0661	49.7993	51.5171	52.8367
1553286_at	290.797	286.52	155.801	222.775	206.142	186.723	159.458	195.827	339.897	231.864	188.226	245.511	143.892	295.483	223.803	226.232	224.769	228.353	145.532	284.992	160.732	197.574	149.766	255.847	145.066	367.604	163.064	215.315	162.825	328.465	669.62	396.974	290.828	335.667	220.09	151.385	167.96	253.349	267.336	281.094	178.891	393.784	207.839	166.411	227.811	207.518	161.074	353.465	217.319
1553288_a_at	45.5667	59.345	40.2861	77.8556	7.73781	33.315	31.5538	86.2774	55.5017	62.7418	7.38918	115.728	53.4083	115.756	62.1183	74.262	63.9627	58.0776	47.937	93.4662	49.4111	98.2221	8.58443	94.1626	17.1774	142.048	57.6887	5.51815	26.7776	78.9413	91.9483	74.4825	12.7341	124.939	29.6503	24.3026	61.6955	50.9002	56.9844	92.0409	76.3733	12.5097	2.23846	15.4732	37.3728	34.3979	68.9973	38.4575	48.0946
1553292_s_at	187.493	307.804	205.215	293.661	102.468	379.051	218.552	497.822	314.517	252.644	291.799	408.963	273.811	410.36	249.874	292.214	292.365	755.105	410.421	917.859	214.184	441.016	363.797	681.386	160.362	369.079	247.07	573.225	388.804	185.522	292.339	430.563	341.03	1065.48	300.024	581.596	409.13	951.946	340.008	1936.99	195.685	355.71	472.654	419.823	222.291	478.427	422.917	548.978	161.018
1553293_at	2.41546	9.52397	6.28668	2.39583	7.86154	1.40128	2.13378	6.50803	14.1908	27.0073	3.45521	14.3986	35.8472	12.6501	21.6779	19.6138	9.54204	13.2397	8.10505	7.26783	20.81	10.7261	51.4468	3.82717	34.8898	23.6031	30.3119	1.39432	3.72315	1.46446	143.247	44.9567	34.1732	1.85049	42.2884	24.9851	17.1148	3.57917	6.63094	4.19193	39.6699	42.9972	17.2962	3.29004	33.5506	2.3375	4.51601	4.99092	32.1103
1553295_at	2.73791	36.155	36.0582	6.97176	26.8604	2.74247	40.1573	1.12725	10.5784	16.8024	11.8445	4.71135	15.4293	1.35124	4.38151	0.466175	3.57404	6.67443	14.3873	19.3493	3.40895	33.3353	11.9019	14.3793	0.344763	59.469	49.5979	24.8853	29.2578	13.3492	51.6889	1.55627	3.05583	1.01203	15.28	11.622	3.91485	24.9789	22.5375	2.86937	19.4497	23.6362	1.14135	6.79532	0.432991	25.7906	2.38844	13.912	3.21182
1553296_at	4.11908	7.22592	31.9155	14.798	42.9435	35.9459	11.599	29.6934	18.5944	2.85823	27.9392	13.1962	62.3745	35.2072	697.067	700.044	24.5822	20.9138	24.2894	24.4622	40.0495	35.8122	37.7754	4.317	31.3345	41.5022	20.3559	5.87929	16.0413	4.62654	368.359	4.82939	3.30549	5.22089	33.5626	20.0961	45.6657	10.0789	10.4128	39.5536	16.6845	19.9824	1.08896	10.7317	42.5678	1.03066	48.5101	35.0353	4.93479
1553297_a_at	398.125	163.884	497.122	385.615	376.762	641.864	640.301	334.394	1078.49	281.899	614.813	229.147	516.403	287.333	556.651	431.523	445.426	254.525	478.923	461.836	635.812	502.856	698.643	298.878	429.266	418.99	314.077	288.574	631.915	398.016	234.569	451.887	444.19	272.42	641.069	693.156	582.119	397.705	546.911	259.016	354.293	357.874	379.844	407.008	649.249	354.339	415.751	260.288	499.604
1553298_at	19.9873	6.32986	2.44873	39.7256	61.0294	19.6359	31.9523	42.2621	0.708271	10.3358	6.19554	56.2196	2.21732	11.1516	36.2409	36.8861	25.5762	36.2905	15.1791	28.336	3.11703	38.9336	6.54542	44.3338	24.3076	50.9265	3.23022	14.3564	16.6882	1.97538	222.411	33.4589	26.891	12.3798	20.5673	26.7023	13.2011	28.4018	25.4237	31.8348	1.46002	21.4197	29.3774	50	1.19703	19.2024	4.08744	24.1237	40.9992
1553299_at	121.305	33.926	10.2866	43.4008	7.65092	60.1498	162.748	4.24499	51.6173	6.86182	206.355	3.67724	33.3749	26.9585	105.749	1.27296	73.4424	16.1208	68.9145	13.9581	307.605	3.19036	97.0399	3.493	40.4428	5.77329	13.1823	55.2524	11.9295	3.52173	207.065	9.63244	158.606	4.92941	133.684	27.5871	115.894	88.9889	124.604	1.29113	271.574	57.1238	108.995	10.1382	73.8473	43.3321	90.9016	2.62921	61.173
1553300_a_at	99.326	153.94	85.6258	115.499	90.2039	92.5372	49.5702	78.9663	131.974	60.3252	71.287	49.4741	148.604	149.167	74.3208	63.0663	82.8823	127.538	86.7011	72.2382	109.832	80.2617	190.546	112.786	71.1391	65.4307	87.7004	84.5358	130.814	114.613	127.166	76.1354	147.795	90.3523	111.964	77.7765	91.1956	112.511	75.9442	66.3122	82.8849	44.4268	48.3997	75.5009	95.1422	105.535	123.427	84.6245	153.752
1553301_a_at	91.0535	83.0461	47.3606	91.1718	64.8429	55.1749	82.9085	56.0287	113.314	67.4344	68.6455	31.6091	60.2906	86.8211	77.9887	42.805	114.762	32.9056	56.7313	5.99665	106.654	40.9026	59.2814	27.6341	132.099	15.839	48.7967	72.9026	67.9301	63.5385	381.57	75.5053	44.211	40.6901	58.4447	75.6557	87.6573	47.4346	51.6399	27.2416	62.7377	41.39	85.8672	81.8066	11.0488	48.9117	111.163	101.235	48.5249
1553303_at	49.1818	26.3904	74.2212	82.9082	7.86473	54.436	7.83392	19.3342	11.4218	15.8883	30.4232	201.083	50.5035	70.2421	44.9137	13.5133	62.2711	17.6827	17.0161	33.7267	15.2195	109.868	6.87441	15.3531	7.42347	18.833	50.6097	58.6876	12.2538	69.4702	23.8462	19.47	11.5439	141.011	15.0616	75.0752	90.9525	12.301	27.1814	13.4725	9.8699	82.0499	63.2834	80.3992	22.5519	32.6976	21.9264	20.0884	7.45137
1553304_at	7.96237	95.1066	6.33046	43.4681	89.3378	12.2105	70.5174	71.1394	50.7875	75.8491	4.2643	25.7346	56.1941	82.7651	14.9159	98.9924	47.4658	65.2016	8.96822	18.7074	58.3759	76.3119	6.1569	73.8458	38.7805	31.1224	66.678	11.9973	15.6343	89.0284	46.5394	58.447	93.3164	67.7878	39.1029	29.0342	46.8664	44.6254	10.2391	29.4021	13.8896	15.0672	7.88302	93.3718	62.5335	8.08037	30.9052	63.6435	101.157
1553306_at	30.752	118.26	20.1745	143.552	100.468	67.8744	120.679	8.3089	34.1593	66.8052	64.0221	71.0945	73.7539	59.1416	6.69747	54.9793	27.0677	68.853	9.47382	12.8792	91.5963	42.9952	121.021	65.6339	50.3683	40.4105	55.6256	25.5769	77.2732	44.1671	256.279	17.2992	36.9744	68.3896	31.8061	31.0273	25.1077	47.7103	60.8152	23.9887	56.9984	57.9479	37.2589	20.8729	10.1759	8.2278	132.484	82.4274	74.8064
1553310_at	28.1174	91.7537	30.0769	11.2764	8.56582	4.01074	56.0194	6.87022	4.57164	26.7167	28.5945	14.6103	3.65234	2.48608	1.60376	21.1223	12.5086	35.1721	1.44658	15.1133	43.5383	4.28379	35.6012	28.7546	16.8917	32.5143	33.1824	11.3187	38.1756	35.7848	83.7597	7.58602	31.0411	9.0398	27.9761	25.6935	18.0897	1.26038	47.9622	64.3246	19.9433	18.2935	40.2328	48.3959	33.6754	62.7756	30.1651	22.4557	9.43257
1553311_at	57.904	42.3335	16.9129	4.22274	11.2385	60.3273	50.055	3.61407	33.8409	10.4708	64.3837	33.3457	45.2432	2.90246	68.0229	17.5639	61.1126	21.2971	44.6659	47.2411	84.2149	22.6005	39.1457	2.7084	76.0761	27.8474	45.4845	33.4065	85.8636	11.8371	217.051	4.32367	43.0843	29.2103	4.02228	4.50272	57.2492	1.69461	69.614	21.8447	133.833	12.645	84.9303	25.6205	31.4278	1.76393	19.1846	11.0838	52.6504
1553313_s_at	183.333	448.775	38.3121	175.405	81.7846	88.7901	290.204	439.344	352.947	220.937	107.275	452.29	56.2096	2030.71	135.82	160.808	147.847	104.265	124.726	340.926	162.262	178.261	62.7576	188.151	99.6565	255.915	110.211	227.905	183.238	159.204	588.985	206.19	114.407	193.954	84.9243	158.052	109.073	286.762	98.6435	278.293	47.0157	151.708	103.68	63.7683	129.878	93.9738	63.4579	208.751	11.0977
1553314_a_at	29.7982	7.46506	2.53085	7.28572	57.1692	10.2963	3.99465	9.81496	29.0214	10.2756	8.09379	36.1075	12.1258	8.46087	6.42127	11.4866	12.7971	30.0337	8.3099	10.7669	10.2885	40.5796	11.6848	61.7316	10.7347	7.44801	10.5126	77.4203	10.9391	34.04	341.397	11.0374	10.3391	51.0663	16.3885	26.8626	3.56969	8.2579	4.42237	51.8432	15.4513	15.7119	8.79145	7.50044	15.4791	6.59807	15.8131	24.7491	31.2018
1553315_at	314.137	31.4152	38.8561	12.8448	84.0512	44.1625	90.5376	34.2148	28.3762	86.0177	142.817	47.0626	26.7816	107.76	90.2348	42.5065	516.128	126.011	60.1953	40.4374	85.3855	134.019	105.877	50.5788	126.298	124.397	76.2591	87.4683	87.4004	69.6565	305.971	110.779	98.1932	93.981	56.6079	53.3292	106.15	52.0382	63.0004	53.1046	113.53	69.7413	135.377	69.4154	104.664	44.7595	74.8943	54.2218	106.071
1553316_at	128.904	23.8232	117.607	117.085	78.7369	95.4153	70.6957	76.3151	31.0259	69.0768	74.0386	82.4754	95.045	6.61413	105.578	74.8744	113.455	74.9744	50.7424	59.1508	69.1	58.7366	177.71	107.986	66.7668	58.4818	84.5403	55.7404	128.626	73.3418	441.78	33.5833	134.363	73.0334	129.1	62.6862	147.576	130.387	128.739	80.1428	40.6628	80.8414	115.698	103.7	85.78	79.5039	133.516	35.012	133.256
1553317_s_at	122.061	2.61726	217.425	40.0735	51.8709	65.0556	74.7524	10.561	12.6311	42.3867	44.1129	2.41193	64.0768	33.3734	91.3017	31.7889	129.557	28.5721	71.9203	26.8241	104.362	8.10307	161.14	37.1769	93.5884	35.6906	68.6862	25.0199	168.943	33.9912	50.4204	47.9529	84.3121	31.5579	98.0359	32.9313	166.539	50.5871	109.409	27.0315	86.4545	46.9251	93.8944	36.0232	59.9719	36.1848	88.1459	28.3128	84.8225
1553318_at	37.7438	87.3104	9.69766	47.4722	45.0995	13.0621	8.49577	20.6657	44.7348	65.1341	71.9335	68.7424	45.4448	15.7752	47.2862	22.3985	58.5783	24.9013	10.9654	4.78101	51.9474	99.4264	73.0955	202.335	67.9779	20.7044	88.5788	57.7695	42.4502	75.0876	28.9097	18.2758	43.748	61.7242	74.3864	75.1993	66.7825	50.1446	4.39186	109.923	102.624	75.068	27.9165	81.7084	8.0565	59.943	17.4296	66.8226	79.1329
1553319_at	4.26119	108.138	25.2317	112.083	8.25853	6.25097	2.6953	98.3273	193.943	81.2008	17.6516	123.81	4.91076	181.692	3.16192	111.234	5.14565	39.467	30.0725	87.5264	10.4641	58.1086	52.4433	63.3799	31.5347	119.196	22.6613	61.3126	22.1965	102.633	184.941	68.3508	4.94563	97.6695	3.95268	34.506	21.2614	76.0903	11.3322	138.293	35.925	75.9466	22.5605	72.1927	17.3693	44.5257	7.2828	72.3003	38.2937
1553320_s_at	2.85239	0.816269	3.78603	4.79557	2.06563	26.9487	11.9591	28.1105	1.40949	0.94779	11.6584	21.1436	12.7334	14.3232	3.00181	0.503524	0.870996	16.4305	2.02727	2.29562	4.74673	1.94273	3.57958	5.21324	1.25287	21.5437	21.519	4.06398	9.10599	1.96282	32.2118	0.6051	16.5324	2.08002	2.438	1.1269	14.4108	0.66857	15.1212	28.7783	2.23293	13.5683	28.2898	2.49807	5.12994	26.3142	1.26996	17.7128	35.483
1553321_a_at	615.463	226.604	549.71	125.943	267.568	257.667	254.795	209.968	99.9444	197.476	280.339	206.863	553.877	134.052	579.157	290.184	404.69	224.635	336.714	159.708	473.675	252.762	304.587	226.225	300.903	136.542	174.738	148.659	225.69	249.806	706.847	350.355	510.241	247.157	639.313	394.319	272.846	219.876	394.448	104.96	310.957	222.022	841.439	239.709	399.593	216.11	443.269	262.96	833.01
1553322_s_at	81.0051	115.726	70.6931	94.0451	59.9687	66.1245	36.5168	66.1179	49.1193	51.3588	31.1013	41.6713	21.8333	76.845	33.5776	28.4273	22.9566	8.97166	25.3922	36.9052	51.3769	74.9255	50.8104	86.9899	52.3546	33.5706	67.1663	63.0847	33.6998	53.5544	140.901	75.5924	89.3833	56.3476	35.876	63.0874	51.8411	49.4505	52.0182	56.0362	23.8848	43.0506	10.9723	33.0435	46.6283	44.1856	67.1923	23.4944	86.983
1553323_a_at	42.1477	128.298	53.106	75.5424	78.2315	101.386	93.6642	79.197	22.6422	83.1373	54.3407	104.003	102.86	88.9198	98.7082	40.6911	84.5488	61.0405	44.3864	44.0012	39.0902	51.1645	77.5355	58.1158	72.7834	84.0484	62.1766	80.2637	88.1602	20.2049	368.646	79.5135	55.0538	66.8772	46.3353	93.4639	55.5245	85.8804	69.2938	76.894	62.1556	66.425	66.1448	61.3111	48.5159	65.0765	65.4004	74.2097	47.2959
1553325_at	103.993	6.6654	59.4613	23.9933	19.4312	60.2156	3.86864	10.1023	51.734	56.6354	54.6972	5.55904	99.2827	51.8051	29.1428	55.5806	62.116	51.3529	27.2022	117.163	43.6115	83.9695	12.6824	16.7837	45.9798	56.8255	40.7487	28.6187	13.4226	33.7487	115.308	15.3898	54.9673	113.543	5.70127	19.2635	42.6685	82.1394	5.83412	4.59323	25.4104	13.8568	62.7222	6.32061	3.71054	11.9584	35.204	49.3031	36.0973
1553326_at	29.4553	47.7497	1.60442	34.9448	60.2345	71.1287	40.6121	1.82611	15.1592	43.6397	7.17902	3.68413	35.444	11.9921	6.10408	28.4222	27.1364	5.6632	10.6211	2.17399	6.59966	43.4685	36.4921	37.4364	33.0085	12.2504	10.457	54.8914	34.2672	7.75298	152.499	41.1861	39.059	20.9307	32.6046	40.2845	24.2116	22.9586	8.68933	93.053	21.6259	2.74619	18.4023	22.6286	31.8217	28.9521	50.2463	21.8891	50.7516
1553327_a_at	4.9536	5.462	7.7333	17.2965	5.59851	60.8788	55.6151	15.0804	11.45	4.43173	6.3609	6.99811	11.3293	24.278	37.5213	5.9357	3.90493	5.19057	22.3669	5.09296	36.1213	11.5952	3.8082	12.8347	35.3724	68.8325	5.17288	9.07534	7.90565	18.663	155.364	56.8866	6.84586	16.9788	33.7769	4.72762	6.30977	18.1082	4.99747	6.0436	7.57229	15.5409	6.17754	40.534	6.80654	3.36257	9.57089	8.67342	9.05689
1553328_a_at	80.648	59.2738	58.1253	47.9706	99.2237	63.547	52.3593	10.0221	54.2838	33.8833	32.5555	16.8759	20.1883	6.81307	1.58655	43.7572	71.5646	20.5344	12.293	15.4675	25.1962	66.3174	45.6354	86.4432	13.5603	61.7001	69.3633	12.3229	43.5323	49.3885	44.3518	27.1649	61.2429	11.9678	46.1878	25.2358	42.9437	9.30195	27.1642	3.36303	3.79243	63.6379	34.2662	75.1075	56.3252	49.6038	82.3466	6.41957	113.455
1553329_at	22.5107	42.4904	65.3569	56.1075	30.4374	21.6513	51.8939	21.5606	54.3468	41.6778	14.9643	57.3709	37.0458	18.6971	70.8264	57.8711	21.5749	37.2858	51.3248	34.224	52.4564	6.01561	31.1554	4.45139	30.8081	33.6142	4.15103	64.4751	31.2442	27.9972	142.13	48.206	21.507	24.0432	41.1268	27.3055	39.3895	58.363	28.0212	52.8627	18.3366	30.156	35.3988	12.1902	55.3208	108.547	76.1217	41.5173	63.852
1553330_at	28.0311	8.95759	40.6745	54.7855	5.06491	1.44774	4.07365	5.13612	4.0162	48.5935	23.7401	7.73221	29.1205	21.4674	2.0042	6.69096	2.03647	6.32106	4.92937	4.9642	2.18628	7.08792	4.62046	8.89525	27.9546	9.25415	8.27663	41.8782	5.88614	16.6137	166.269	15.8906	6.12507	58.5115	6.10933	16.8085	28.3981	3.1763	25.9154	39.5312	5.30372	4.29543	7.98135	32.828	21.5951	30.5028	29.324	4.64319	4.22671
1553333_at	5.00941	125.946	89.1492	138.864	278.11	121.087	211.748	47.694	1177.2	51.2271	39.5029	83.5925	79.1706	85.7006	137.441	97.4822	24.9173	69.0633	4.66384	7.09764	164.188	69.8649	6.31804	87.8514	91.3036	125.203	213.336	136.221	185.729	83.6546	390.671	127.619	37.7516	78.5371	10.3811	126.536	9.11873	78.7263	2.99393	9.08317	84.6759	99.0322	2.91322	73.9633	29.8965	66.9185	117.028	95.5741	99.2678
1553335_x_at	20.5405	41.3053	55.4839	6.99544	3.3395	18.9254	2.68577	25.3649	41.5995	40.0029	22.7063	72.5955	60.954	67.9694	34.1624	8.38126	101.77	49.7591	31.1516	85.0727	36.8887	56.4537	44.3778	35.0368	57.4074	60.2092	8.5518	65.5596	35.7263	33.3806	170.009	45.2431	88.1261	93.9645	70.9522	6.12475	35.6086	52.7685	26.4675	25.9793	12.9901	57.6681	47.4985	17.5446	62.5161	33.4622	18.2989	22.5423	81.0876
1553336_a_at	18.0886	88.6697	19.8516	15.4093	9.46486	8.16228	31.7784	97.2393	28.4867	6.05531	46.7172	4.19104	11.9312	9.57236	41.7846	6.31167	13.8314	25.5071	23.5739	5.36235	15.0224	59.0589	7.65355	15.1702	6.0401	6.35529	2.71544	24.049	3.07421	25.8918	38.698	34.5036	20.535	9.32402	21.7002	38.0378	2.51732	4.44045	22.2168	6.35475	84.9828	4.02204	18.3084	27.742	39.6844	30.3953	2.8363	46.6886	86.7933
1553338_at	133.826	86.5321	121.251	19.6404	35.7721	100.537	97.6572	97.0898	165.649	101.943	93.3838	122.76	161.018	122.531	81.0642	98.9669	104.915	98.5946	181.105	85.4123	110.581	181.023	128.994	19.2532	74.4357	115.157	102.364	117.215	85.7333	62.6908	221.279	83.4883	141.365	107.065	144.02	188.948	147.949	128.381	88.0897	79.2796	72.6704	153.562	114.071	80.8855	118.04	143.099	142.875	82.5857	154.754
1553340_s_at	10.7332	9.24386	74.3555	54.4547	119.254	48.9712	40.1633	103.102	43.9788	13.5072	13.8026	13.862	14.0768	6.32045	58.947	14.3167	6.8583	6.11747	10.9697	11.4432	8.86876	14.972	81.0694	51.5188	7.77442	90.9436	12.6224	44.8096	13.6325	73.2829	355.48	10.1728	21.0604	106.053	12.1868	8.84641	19.1511	14.7435	72.948	10.8486	7.9019	8.46915	23.6846	58.0815	78.4567	20.3766	81.08	7.40026	31.1898
1553341_at	53.6413	15.3469	2.89069	12.9863	11.566	5.7743	40.5936	3.31018	2.36675	31.8568	10.5355	9.52753	9.62581	4.53259	5.17798	6.39151	22.0342	5.48744	2.78348	10.019	8.10875	17.376	9.75698	8.13721	7.32397	5.46999	6.89871	13.0061	25.1954	16.2501	107.48	7.65212	5.8537	27.7079	6.56182	7.18125	23.0387	5.6148	32.7731	9.2783	5.67807	9.78168	75.8151	5.45858	25.5055	8.51109	54.7007	2.32033	12.4181
1553344_at	0.862114	4.97382	11.9557	1.58649	1.04692	2.18136	2.79474	28.8212	9.25627	1.34427	0.577147	8.65729	12.7419	7.34747	1.05267	1.37331	2.07231	3.06522	2.03054	0.778098	1.21951	4.1285	2.21115	24.7988	9.09079	2.90393	1.49203	5.02594	1.20975	2.65722	79.2898	3.71469	2.3179	3.29663	1.6117	13.1877	0.983705	2.16273	19.6129	0.797536	1.9668	1.02216	23.5063	1.50358	1.83402	1.25537	1.39847	25.5445	2.2507
1553346_a_at	19.0435	141.169	42.5202	76.2127	67.7615	46.2181	77.7233	86.7586	91.7778	50.3406	27.8324	58.5577	90.2456	86.5299	58.0758	52.6767	92.7404	75.358	94.9182	84.244	205.033	239.452	138.644	138.271	80.7555	29.9676	41.488	92.4712	78.5831	49.9891	1052.72	11.731	57.6203	64.8527	39.2598	36.2722	39.2987	63.795	19.3517	76.6235	68.8188	65.0823	21.0482	32.9945	79.8763	64.4413	79.8157	77.1318	180.81
1553347_s_at	2.8565	20.8372	47.5582	125.69	17.2515	31.9025	62.3179	15.1988	70.6871	58.3842	43.0076	9.58203	18.3148	30.3385	11.295	5.59934	13.5394	9.47239	6.14036	18.5848	21.2311	15.6248	55.657	44.464	30.881	10.2002	98.6782	33.0767	8.999	7.83127	300.795	11.5368	54.2072	56.9913	17.5552	53.5819	15.5645	12.3388	59.9772	13.1354	17.6373	5.01247	8.50469	5.17913	4.58542	30.2386	113.633	26.0605	18.4988
1553348_a_at	310.495	282.256	308.273	269.376	213.11	368.34	194.325	348.706	382.748	249.827	401.769	283.173	357.444	163.018	390.329	259.703	401.776	249.143	353.863	277.331	424.746	462.672	536.909	210.113	303.259	265.097	272.279	295.15	354.716	278.488	759.744	353.836	444.608	260.488	368.48	363.075	369.514	317.813	294.257	398.904	451.111	280.251	302.05	369.675	343.971	219.06	450.349	304.935	300.38
1553349_at	786.938	534.38	588.895	264	744.627	938.223	479.41	296.357	441.838	316.374	881.036	502.648	571.31	594.214	623.729	365.798	769.676	357.411	745.928	535.962	794.129	396.621	672.836	540.525	435.267	487.204	490.224	594.27	610.95	411.584	1336.67	654.689	911.193	433.788	967.37	527.004	928.668	441.884	639.913	547.627	978.894	409.539	854.081	412.862	808.181	445.799	633.748	489.563	583.172
1553350_at	14.6171	28.2541	7.64801	82.3958	16.3599	12.0292	23.466	99.1624	6.25365	13.4128	16.3933	20.6722	27.5864	32.2402	18.5678	11.1702	34.3969	98.2033	10.4831	14.8399	53.0665	15.8895	44.076	16.3361	13.4439	40.0534	10.4041	16.1636	82.4514	15.6069	214.854	66.4617	16.9474	4.98417	22.7366	25.9701	10.3278	12.3116	66.6887	59.1908	72.5586	30.184	69.3219	16.8966	38.7396	23.7343	57.3237	75.2462	19.3273
1553351_at	76.9399	37.0153	16.0827	9.76704	9.75913	39.0709	45.0601	58.7989	101.488	46.3035	103.008	95.045	17.4844	60.8273	25.9545	43.5451	53.5109	23.6503	43.0201	52.2356	70.9208	73.166	11.3846	11.0151	41.7593	77.9487	17.8611	53.7256	2.42625	65.9436	710.966	66.7382	54.1833	28.5286	6.85376	40.5135	20.87	63.8766	51.368	48.9616	97.0346	36.1157	83.4428	67.805	72.154	43.5463	62.2479	19.4763	40.2751
1553352_x_at	87.1416	34.0366	85.4294	94.204	16.703	111.206	68.1316	102.037	141.843	69.6157	32.3761	97.1098	67.1898	67.0719	59.0849	71.6903	69.0899	119.529	71.6778	107.91	85.3016	46.8576	18.2229	145.99	111.73	61.872	22.4564	157.719	78.7739	64.261	623.193	86.2552	117.484	18.9143	97.5152	122.793	55.8404	98.0349	53.9066	141.03	27.5124	116.744	64.4839	108.625	36.313	61.9059	86.5624	95.4558	138.564
1553354_a_at	77.2768	20.5224	63.2796	24.0852	20.7768	82.2152	8.33977	65.3619	52.0449	91.1525	25.7669	145.133	140.766	50.8646	69.2416	87.1011	62.8485	79.7267	60.4401	84.4894	63.4571	169.95	91.9758	120.444	62.5692	92.7289	86.517	13.4672	81.9538	65.3301	145.327	11.0941	157.584	70.1779	111.563	56.706	47.8426	98.9077	49.3486	98.5363	64.5839	64.5962	61.6777	67.214	59.8563	109.672	84.6948	100.079	81.2625
1553355_at	11.2175	16.0063	15.4186	10.9233	7.67477	4.17356	5.06771	14.4959	4.33271	20.8102	5.17904	4.71833	5.98958	5.40795	11.0757	3.29313	12.3101	6.84943	11.7506	13.8789	2.33639	16.6538	5.65821	9.20317	27.1553	8.32171	35.4077	3.35134	4.41162	8.70001	196.713	9.19579	4.46251	53.1354	9.91975	6.21363	8.69878	22.256	8.42891	17.2077	2.20284	11.2997	4.99879	7.75481	8.41567	5.39666	5.60978	6.12022	55.8398
1553356_at	4.11687	3.59307	2.16256	66.6336	1.91984	30.2153	3.88188	4.11898	2.4119	27.9018	1.29286	25.8148	17.2541	5.13071	0.678426	4.21738	5.22176	21.4261	2.77676	9.48299	10.098	3.5962	37.8672	20.4907	11.6652	4.83632	8.34139	3.37555	33.1502	3.20674	283.655	48.344	6.47024	12.2333	1.10067	3.2179	24.9077	2.10735	30.7759	25.6906	3.54171	19.4526	1.76246	6.91772	14.3956	20.4587	22.9629	1.56968	33.5564
1553357_at	34.7962	5.86296	7.96728	29.4212	17.4377	29.5458	3.01029	30.8542	46.7431	3.75668	25.5852	39.9469	42.8935	38.4969	25.1805	37.6246	22.0727	5.02739	36.0352	14.4053	52.3063	9.84116	26.6078	18.9937	32.5433	47.3549	43.6123	25.8776	23.7961	25.4421	93.6421	7.92231	5.02081	5.39317	29.8524	40.544	10.422	38.9823	47.0513	24.4155	10.7709	2.57215	38.3213	37.6846	13.4707	6.39781	31.6061	20.7355	65.9364
1553359_at	35.3954	338.51	82.415	142.854	18.4503	68.8261	28.3341	113.059	20.8426	211.226	20.0588	107.532	33.1658	38.2805	29.2401	226.034	16.5837	304.551	13.2262	77.0319	21.2777	101.165	19.7724	214.94	30.1412	205.699	146.289	29.4058	25.4756	241.874	182.16	195.423	30.2418	241.311	20.0134	73.8037	56.54	43.5584	20.6684	209.084	16.5724	148.219	25.0873	83.6909	30.7827	74.2822	27.8042	124.767	33.348
1553361_x_at	20.5512	59.7157	17.0305	165.678	102.144	22.9905	25.9638	215.215	31.1653	201.274	20.8977	147.296	21.2104	42.5914	23.6343	117.625	14.378	168.414	16.2405	74.2112	29.257	103.106	27.4621	53.2708	114.108	97.4169	190.291	198.325	17.0141	89.8086	55.8913	111.183	38.0661	199.233	25.7138	32.1262	29.9533	87.8077	14.2018	58.7664	21.2901	160.151	16.8447	187.841	24.2997	57.3598	43.7305	196.727	16.6438
1553362_at	13.6945	3.07897	2.30394	37.133	0.8868	22.46	21.137	3.2891	2.13941	3.40348	1.20111	1.71288	13.9106	18.758	6.68777	18.7744	16.3588	0.160672	1.48373	7.60368	1.15635	7.03438	5.97291	1.13171	1.57645	20.6679	0.470139	2.68612	1.64842	2.20011	62.4466	0.473514	11.2599	1.57298	14.6188	48.3149	7.14482	5.34844	0.347201	32.865	8.32112	37.1908	25.098	12.6032	1.87507	0.456008	9.32247	1.00919	2.52515
1553363_at	20.1141	95.9181	52.9007	124.621	42.3424	27.3954	40.9472	50.8929	4.91697	24.9204	50.7874	14.4352	53.0318	16.1282	40.7808	5.46571	65.5391	8.64624	54.292	4.21657	80.3689	5.75351	49.5497	28.0989	36.491	6.72534	46.4338	26.3361	15.7102	6.85109	19.2704	18.4245	64.6939	106.827	33.1444	35.2635	37.2981	5.63975	52.2276	55.3917	78.1431	100.786	37.3152	19.8253	60.5423	8.31637	50.6431	20.4476	80.1525
1553364_at	2.96661	116.234	2.963	237.246	12.3235	30.9621	28.2311	143.94	38.0185	66.5676	2.36626	98.7306	52.7197	43.4043	35.8143	272.764	14.5582	142.652	13.528	25.0186	70.5869	158.165	35.1449	180.608	28.3491	118.968	97.7542	125.794	2.39123	93.8894	217.397	183.925	21.0869	183.601	12.2412	8.19918	4.52683	126.07	4.7825	108.037	4.20892	72.8392	26.3072	105.249	4.01967	110.775	4.58202	139.491	55.2748
1553365_at	20.2725	61.7808	45.8498	100.555	4.28149	38.9692	56.1267	29.8125	17.5861	82.8321	8.57558	6.61957	41.7747	46.5956	80.3362	26.1986	2.4977	37.6907	22.1476	30.2819	39.1327	84.6529	8.35501	91.8007	16.4727	27.185	25.3854	8.70568	13.7142	56.225	184.07	37.5368	37.6668	51.8954	7.91219	5.59089	4.08837	9.87772	10.457	40.9763	31.4904	11.1342	17.8157	59.6527	2.73449	89.9287	26.6479	59.6976	37.0213
1553366_s_at	84.8926	65.1364	26.4321	35.2847	28.4692	26.0315	80.0368	110.047	15.3604	24.3568	28.0716	24.0624	43.6184	73.9345	21.9589	22.2596	40.0339	22.1434	17.726	20.9245	76.5216	94.9351	171.036	38.7263	28.8802	122.172	97.1424	118.338	133.697	22.5736	13.8952	104.937	146.768	31.5539	115.373	145.599	23.669	17.4677	29.8609	27.6999	14.4757	21.9654	43.9658	66.7495	34.2719	84.6441	96.452	31.8214	19.6789
1553367_a_at	18.9977	195.078	10.7504	93.3197	92.7641	114.613	77.061	26.7593	16.1761	49.0338	16.3422	147.903	86.7469	123.723	72.5079	9.90716	8.67349	54.6134	59.4566	50.6554	50.9382	94.4845	99.0172	24.6107	80.0324	42.6394	31.0797	92.0011	72.0803	79.3878	45.878	90.5083	50.3696	85.2263	15.4744	22.9172	66.4328	80.2547	39.6507	55.0402	92.789	58.1976	23.1018	37.074	90.1835	102.433	63.0471	53.5917	68.3173
1553369_at	87.9836	84.4023	12.7951	12.8989	10.7103	92.9261	8.49798	19.248	14.7083	5.46161	8.54966	7.18829	34.6095	17.7323	11.9206	23.157	10.9975	6.87449	69.1493	9.87278	16.4484	12.6388	81.5671	14.9313	12.3674	10.8732	48.7498	52.2774	34.9481	4.7358	392.821	8.81532	15.3173	11.5879	44.6099	28.4547	21.392	24.5998	56.2087	4.29074	16.051	8.10338	8.71691	5.88769	19.184	17.5686	13.958	74.3296	58.9575
1553371_at	40.3038	6.72458	10.7436	92.8224	7.50999	16.5224	44.664	14.6085	2.06345	6.00112	3.1249	4.97124	51.9253	19.0803	1.82503	49.4821	45.5786	14.3352	40.9644	11.7735	1.92776	15.2419	4.71873	14.0129	15.9153	16.6426	27.8637	4.64228	14.1533	45.0359	106.696	62.6945	18.6848	17.7662	3.88732	33.0342	16.6272	36.8034	1.82834	18.2241	7.02398	38.4818	23.7962	4.74263	32.2668	33.1833	9.36339	43.3738	5.32077
1553372_at	33.6124	65.3371	10.6465	23.1554	95.3479	28.6002	69.9983	16.2398	4.8383	16.3077	5.31445	83.808	13.5167	19.445	13.284	34.6498	6.75537	7.31609	28.4943	7.87099	50.1349	21.0701	9.23061	67.1049	57.0701	73.5654	12.8689	8.95082	45.9383	14.489	375.884	19.788	8.1677	65.4735	16.1213	9.41005	40.0204	12.2039	66.1036	15.3636	17.6756	33.7365	52.9637	52.2045	12.1837	46.3918	12.6541	19.1274	90.288
1553373_at	36.0968	52.9208	57.5795	61.223	41.5987	80.9026	56.8844	36.8597	34.7539	30.4072	26.4103	37.8655	61.4693	36.2691	26.6253	38.5026	38.5069	6.0035	40.8877	5.17705	54.6042	11.7127	44.2404	7.91858	67.1778	13.2077	25.2022	35.8856	45.1525	40.342	144.179	10.6879	51.5148	2.58068	39.5508	26.7789	30.2325	18.7693	9.03629	4.40126	43.2945	29.6689	20.9382	15.8151	80.0228	20.8206	75.2637	33.2317	12.2856
1553374_at	1.96135	37.0752	4.56903	6.75738	34.9741	5.43827	15.988	10.4339	35.3443	3.85102	5.65818	2.41574	24.3416	39.4867	33.1157	6.37408	6.36671	11.1404	18.7799	33.9228	22.8977	29.8143	5.66355	45.948	4.07886	2.93853	49.6545	33.8687	5.29227	28.0623	190.461	13.9899	2.3712	8.48849	33.4027	18.1322	23.3915	42.1912	18.0099	5.58552	35.7037	4.93851	3.56651	19.0215	44.7814	9.37679	5.4271	3.71007	42.8184
1553375_at	1.90189	5.12192	5.63721	8.96446	50.3735	84.5198	26.471	74.3365	6.26249	35.5783	1.98282	9.6012	15.0884	64.6453	48.7836	49.7856	67.025	69.1243	32.0657	12.2618	69.9079	21.7576	62.7052	11.651	11.3325	6.30405	5.77357	87.7921	19.4598	9.99416	427.45	45.1444	11.1901	88.1484	22.9267	4.01546	16.9167	8.39463	11.3934	31.4423	36.6038	36.3826	23.4712	20.4209	30.7993	10.7183	42.3201	6.61515	14.8811
1553376_a_at	40.2384	67.4542	24.0688	79.8153	50.2088	4.90122	17.5257	3.55165	11.1031	19.1413	4.49728	42.3163	37.6307	13.7786	18.0939	2.16669	20.8801	26.7452	9.0556	18.6074	11.3344	70.4041	71.3504	26.2735	65.5203	48.6893	3.43117	31.6328	40.7802	5.25084	136.392	65.5701	50.2814	58.0776	4.31111	15.4628	1.08544	32.0813	30.0498	45.268	2.72047	47.2858	4.85387	11.274	39.2476	44.405	57.0701	38.4633	24.6974
1553378_a_at	39.3171	64.3691	78.5817	83.1732	35.2456	24.2039	10.2235	17.7338	16.1046	76.0484	54.0018	67.7419	111.452	53.5549	38.6324	7.26986	15.0828	22.8266	45.8025	6.98151	72.5973	8.47617	65.3778	8.12162	33.524	9.5609	43.8127	13.5673	13.8174	34.5597	157.515	66.2319	9.30705	26.4174	86.3194	38.5564	9.09769	17.47	6.68849	51.8526	60.4578	40.0654	61.5548	5.42298	29.8234	41.8552	29.8858	20.6812	10.8968
1553380_at	23.2915	3.10967	59.8227	16.4668	19.4931	22.4985	2.403	1.78058	6.2106	6.23417	9.06023	32.7138	37.7324	26.3507	24.3123	5.65419	14.6341	4.51425	15.4141	17.2651	18.1787	2.64246	51.2854	52.4309	9.81654	1.82486	42.2222	9.06081	37.7043	5.40869	141.805	2.37228	8.81162	39.6323	17.7745	1.88156	0.997219	16.1636	0.853091	15.1759	7.53256	26.2323	25.2791	7.08157	8.85869	1.45833	5.60155	53.5398	4.05039
1553383_at	7.38824	94.6547	7.95892	80.4434	3.45391	44.2257	2.24913	3.0156	38.5199	4.39866	10.8061	20.1464	37.4053	19.1363	5.26856	27.8259	37.8383	5.26126	2.70793	5.87149	3.47635	61.3951	79.0539	37.3717	7.96283	3.99948	3.43296	68.0671	5.38434	1.33925	14.8219	9.41807	52.0512	4.19738	16.6354	1.32766	52.7908	47.7141	2.15194	18.8047	34.4394	5.21086	4.88203	3.35155	48.6287	2.69784	2.90432	3.79017	61.0044
1553385_at	44.4544	67.8825	48.4287	110.003	71.471	22.9908	27.6228	18.4245	15.7642	54.9005	18.2756	27.2496	17.3865	15.4589	12.9543	8.76	6.11315	23.6539	36.2361	8.4232	18.7786	24.5124	13.3789	22.0839	48.9963	130.04	8.65345	12.4274	3.15515	39.3402	144.052	8.30438	6.24514	10.6842	19.5701	7.45349	3.07772	16.9087	13.538	5.09815	4.01969	15.682	52.2373	35.3305	84.5719	23.1564	9.89304	20.0695	6.97554
1553386_at	80.2945	32.887	12.4287	152.959	182.541	98.8896	306.122	79.4665	36.5278	120.593	56.5181	79.1929	51.1924	170.769	90.8267	108.295	75.0605	89.6341	52.6006	27.6611	89.6748	128.561	87.664	49.9229	60.253	64.6789	68.6774	116.846	123.682	70.8626	306.236	112.334	123.537	120.523	97.9635	65.4265	53.6785	87.1733	15.6107	125.414	70.68	101.251	90.0171	109.052	75.6104	108.995	62.3936	126.917	86.9495
1553387_at	51.9873	89.8199	105.172	174.536	41.0676	133.932	88.0819	28.9379	26.3901	30.6527	98.8185	21.6702	163.012	127.251	108.51	8.306	93.8342	76.5747	113.685	102.867	101.482	56.0147	139.581	81.9572	51.5511	214.527	152.505	103.705	151.775	85.0947	279.964	12.2561	138.51	38.8081	32.1791	72.8971	142.413	139.748	130.51	153.136	293.609	74.367	98.4159	46.4488	14.2976	50.0035	160.677	120.552	114.084
1553388_at	4.24835	33.2613	31.0668	3.32454	1.87644	5.14841	5.46649	48.3953	39.3479	19.0787	40.137	17.6429	1.81175	9.3303	2.77684	5.74639	28.4292	8.01618	13.0781	7.40027	6.18045	7.94481	7.32815	8.5869	29.5434	14.734	3.05136	10.572	7.80605	45.1039	165.988	4.12907	18.5287	44.9348	3.30382	46.4475	37.3643	21.1212	1.22331	10.166	3.17804	6.1974	26.1154	3.08669	4.57035	10.2125	43.7174	4.48213	3.7578
1553389_at	59.8582	189.787	55.4647	149.592	82.6576	10.2728	86.6678	40.1877	29.0672	85.4442	61.6262	25.6449	87.226	56.2435	88.0241	125.341	58.572	52.3978	32.8382	12.4559	140.694	18.2415	59.6364	94.8456	3.99515	118.316	10.3644	28.2165	84.3484	65.4205	359.658	62.1453	132.83	56.5379	74.4977	48.9417	110.3	24.2153	62.3794	9.80046	160.35	48.2564	66.4617	14.1586	71.2817	44.1935	104.763	38.2253	102.188
1553390_at	16.8864	6.76856	2.87438	186.41	85.886	4.95158	6.91581	36.2766	4.80221	2.48685	5.06083	31.5373	7.05375	29.145	3.3884	9.92355	6.99014	2.16085	2.73557	5.60144	5.95251	99.3725	20.1366	47.3648	7.5825	36.7208	16.3575	83.6529	46.1122	27.7393	111.126	6.29898	55.932	37.7916	8.56084	2.79607	3.28822	5.42851	3.77664	5.5043	28.7694	58.6073	15.6515	41.6548	9.72641	3.22041	8.65607	1.71583	16.808
1553391_at	2.43364	2.70263	33.9002	15.1141	34.0329	36.9759	93.6909	73.3453	2.30138	38.2714	16.2181	33.9117	2.95623	28.0702	36.9109	19.6495	27.5487	1.74199	8.76105	3.35636	5.60494	6.61154	12.8099	42.5379	7.84072	11.4527	9.31784	86.0984	19.0132	3.83594	231.824	17.0683	18.4081	14.0458	35.0664	13.0234	26.5923	25.5551	3.4935	5.94513	10.1273	23.9758	67.8656	6.97047	18.749	48.4926	41.4047	8.56353	4.14028
1553392_at	326.141	41.3309	51.4907	8.48531	89.365	9.20483	405.403	2.67348	439.107	12.7139	111.974	4.44966	166.688	38.7073	260.422	0.942865	312.524	1.5263	68.983	4.03402	252.325	17.6256	62.7711	1.34281	336.619	5.79721	46.2832	28.8484	93.7185	1.18513	91.4714	5.14955	194.979	37.0428	237.737	22.4926	300.896	2.35502	233.258	9.32546	492.908	18.3367	159.537	16.8577	481.309	36.4451	110.802	9.51377	235.906
1553394_a_at	4.64332	1141.39	14.8478	749.232	191.284	471.586	73.1645	1182.27	14.7637	380.561	10.8601	1111.57	18.6275	841.323	17.637	712.783	31.0609	374.766	30.9506	425.723	27.6632	777.99	33.8969	915.635	94.2661	679.965	380.368	725.048	34.9579	448.997	554.158	534.26	23.3488	337.995	39.2183	490.939	2.08148	424.607	7.73241	640.792	48.6166	258.269	21.7598	364.87	10.0652	236.85	20.5547	533.415	4.12665
1553395_a_at	146.995	193.979	269.47	51.8278	114.982	221.332	130.561	109.62	78.12	112.017	157.268	141.517	412.881	147.533	202.588	112.631	143.805	129.405	225.773	104.581	128.334	220.464	591.733	153.335	140.109	156.444	144.914	139.612	479.754	245.231	458.23	198.799	186.632	87.5722	237.081	154.44	146.085	133.207	189.206	88.5905	79.5293	74.4142	158.29	157.162	120.752	155.828	250.529	160.04	236.301
1553396_a_at	22.1384	568.675	176.175	630.291	185.824	141.21	131.434	586.696	191.053	237.331	13.7561	484.336	78.8162	263.656	94.9133	211.061	13.9446	221.563	14.7467	165.028	9.66074	546.362	148.134	607.639	103.001	428.642	317.036	300.808	81.0142	278.015	351.718	308.092	25.3223	587.354	94.5289	233.381	7.14118	102.657	19.2143	293.509	17.1915	164.29	18.3858	142.045	27.3223	210.451	52.1534	76.2073	108.833
1553397_at	24.1515	289.26	143.361	396.047	74.3888	180.586	9.75217	237.442	141.257	188.418	92.6493	210.473	47.6411	224.449	196.765	183.685	125.394	203.427	88.4348	210.185	131.726	399.646	263.329	190.01	76.3473	233.147	228.727	219.604	137.886	226.001	382.413	236.212	91.2597	374.512	149.672	191.059	153.518	197.853	61.4687	55.9366	98.2228	186.153	148.428	106.753	149.436	185.788	133.689	207.347	113.915
1553398_at	31.5927	34.9497	19.3837	96.7128	21.7696	2.56614	8.8456	32.042	2.92938	5.44463	6.1188	35.4174	39.6395	52.657	35.8018	9.17993	33.8758	44.347	16.836	7.02074	56.4154	61.0179	0.826623	10.6996	6.47123	6.96955	10.568	9.43215	14.9435	7.55853	8.98591	27.826	39.3313	8.22419	19.5845	36.9463	20.2444	19.3557	2.531	6.55919	43.8098	43.2811	5.60165	7.66015	27.2753	66.8389	77.02	7.6873	5.39767
1553399_a_at	89.2586	133.51	20.093	49.1538	220.216	125.003	146.779	86.353	99.7464	248.548	122.606	284.741	149.258	173.517	150.186	200.964	162.558	209.757	81.2352	250.073	138.248	265.861	72.2542	164.276	129.645	249.802	210.548	176.357	105.789	114.82	225.971	174.03	57.7236	299.362	233.344	113.787	131.949	37.7146	118.424	214.042	159.647	177.922	151.019	167.654	150.99	244.035	172.074	149.369	200.231
1553400_a_at	118.249	164.349	220.96	215.202	159.715	295.364	184.068	161.342	237.558	139.366	275.348	194.724	272.71	194.946	319.243	229.74	204.12	134.917	138.678	139.309	238.036	169.851	172.367	125.998	147.201	157.01	135.421	150.916	126.623	116.939	506.466	170.315	168.762	118.559	152.696	182.381	192.151	190.825	210.504	165.169	435.915	161.144	201.494	142.435	85.3065	109.631	248.814	176.803	277.353
1553401_at	26.391	8.28531	18.7081	43.955	65.3688	17.9738	48.3958	39.0829	25.0872	31.1821	47.3077	41.7503	24.3384	26.4361	38.4581	55.8189	33.201	37.7916	58.4894	37.8984	53.8996	45.759	6.59473	42.6424	12.0825	48.6092	5.83427	38.6514	21.2033	40.7649	738.303	27.146	72.54	20.2095	21.6231	4.58603	31.9952	39.8531	38.5416	71.325	30.4959	47.5034	12.1299	37.7775	59.1399	5.19042	44.8122	6.79868	32.3241
1553402_a_at	84.0437	9.97243	63.7612	22.1086	31.6878	52.056	21.6716	77.9871	39.8556	100.656	108.966	34.1922	59.4194	41.8154	178.098	75.9247	89.8832	53.1924	92.0335	54.9188	187.643	46.0784	82.1429	117.376	65.0544	41.3649	71.0822	47.2982	70.9544	56.6337	241.447	41.9787	129	97.4531	95.5166	39.3447	64.7889	46.1114	49.0466	49.5617	65.232	82.2593	130.999	60.2691	60.5294	60.8848	95.0195	45.9034	98.8378
1553403_at	9.71678	14.8586	5.68394	37.0214	6.83758	9.32633	6.89396	14.1011	3.11804	5.37661	2.69613	3.65688	4.62467	6.55945	4.23419	8.32357	7.61672	10.752	2.98333	5.70936	7.96347	10.9299	1.74032	8.59812	3.7098	10.2522	6.16298	5.21375	4.52578	4.39336	4.72611	3.32252	4.06583	4.30581	5.78061	10.1198	18.8066	11.8114	2.22667	9.15364	4.10638	12.1729	5.14952	3.21484	5.01409	6.25703	5.45289	4.00121	17.9409
1553405_a_at	39.2152	112.897	56.2008	61.4776	56.5346	7.11893	92.3552	116.292	11.554	54.4436	26.6434	75.0096	46.5964	52.9206	22.8156	4.95071	24.8253	87.61	49.8645	115.358	57.66	159.171	9.16921	134.989	16.7792	135.986	35.2293	17.9295	19.7725	91.4628	220.841	81.4495	34.6425	138.217	21.5776	158.133	16.7271	62.3622	25.3815	61.2283	65.2764	62.5673	32.1381	71.3288	29.6365	98.5764	24.0352	117.485	32.105
1553407_at	245.836	175.894	226.641	192.328	305.652	298.704	153.04	142.823	128.247	130.726	330.562	163.614	197.874	213.663	198.5	155.071	286.298	117.702	202.234	128.374	171.415	170.168	258.721	143.924	184.82	281.551	376.529	293.373	210.503	156.338	397.644	215.16	208.919	185.876	198.703	153.352	183.393	235.087	211.039	118.484	232.331	195.429	202.554	132.074	297.114	155.531	207.552	212.934	241.164
1553409_at	1.21543	2.87025	30.9709	4.20322	4.86722	7.60384	28.0769	16.4777	3.84819	10.0955	6.79668	2.1032	5.5249	61.4537	1.5792	26.8908	7.60263	37.2374	6.10208	1.47246	42.6871	4.02125	10.2743	16.5775	6.6933	47.8527	5.17339	50.1878	15.9481	45.7954	208.717	1.91534	2.14177	6.18566	21.7982	8.76638	26.882	2.4497	2.68231	12.8283	5.77229	6.87374	44.2657	25.5682	1.88203	41.4211	9.07551	1.72794	4.69536
1553410_a_at	3.64492	18.9115	2.54881	13.0076	8.05306	8.11746	4.6847	3.53245	2.73715	11.8685	7.9123	3.57601	10.4642	3.27173	2.5877	3.8878	10.483	2.63061	1.81922	3.70565	7.74372	5.26382	27.4579	4.55778	9.16444	3.47987	5.64462	6.92331	6.3984	7.58948	439.041	5.67907	7.42349	21.2374	4.84425	5.18856	5.07936	2.91201	1.88212	9.18338	6.84645	1.94962	8.0475	2.37288	2.13235	2.90061	7.59431	2.34373	6.20236
1553411_s_at	1.68276	128.665	3.50271	53.8458	77.6384	42.9995	30.4486	52.2267	63.7573	84.4299	37.6207	64.748	14.6032	101.683	5.22955	140.695	35.477	58.8497	53.7173	91.7694	7.33185	102.289	4.52395	121.962	34.9104	135.648	91.4202	30.7246	8.19609	106.489	8.39468	100.377	9.70824	100.634	4.79799	27.3059	25.6763	79.9086	33.0269	75.8601	6.51812	84.0333	2.25955	64.1082	50.9363	71.472	32.6202	59.6104	2.33407
1553412_at	38.8963	92.4218	54.1208	60.3909	80.9735	30.9491	15.5822	82.7081	14.0097	78.7199	43.6491	118.975	70.29	40.5045	45.3768	41.861	35.5977	102.399	3.86771	96.6091	97.3834	18.9204	32.5535	53.8805	38.1892	116.82	37.3185	99.3037	75.1948	71.2586	283.661	44.6876	47.3989	54.3176	33.6708	63.5514	9.48019	54.7419	29.229	65.7848	26.6682	19.274	100.249	78.5088	58.2116	57.0272	54.2207	46.3066	39.918
1553413_at	4.67555	45.3921	4.49444	16.2958	7.06898	6.27706	12.7861	8.33909	12.7055	8.93388	2.12815	11.338	4.08183	11.8856	6.4971	66.818	42.8798	19.1569	2.58545	7.34765	12.0431	21.1758	2.97154	56.319	7.20321	60.8473	7.05756	44.171	3.26321	34.7485	17.3516	13.6249	15.4613	10.8156	13.9153	82.2218	7.05423	19.2331	2.95369	8.74721	4.56857	10.104	2.36258	42.2951	6.17201	17.0861	10.9223	6.8856	6.38636
1553415_at	32.4253	7.40129	3.13626	12.2976	18.3577	1.14906	5.16045	6.95215	41.9602	6.93508	0.595202	26.0998	17.2315	12.6185	3.99573	3.48904	12.2838	4.53473	20.1911	7.7046	4.86857	38.5036	1.74719	3.9513	5.45779	9.42383	13.2074	45.7487	6.99244	3.76765	52.0437	4.24079	3.91962	4.7324	16.3367	2.7624	1.63729	51.7247	1.33839	3.35944	43.2308	4.25487	12.6567	1.98554	50.2558	38.3472	3.5352	1.25691	3.10096
1553417_at	58.293	78.2885	64.7868	100.322	39.0756	70.4317	2.6573	74.0398	19.6981	78.1088	38.2933	91.1526	89.4939	65.8648	45.6997	30.3718	32.1912	12.7752	7.65159	57.5404	62.5792	69.5449	27.9007	45.735	28.1449	102.225	41.5235	104.604	31.927	72.4814	152.576	60.6417	55.6033	77.3547	26.1286	18.1806	5.31229	58.712	38.1624	66.1168	44.2563	59.1824	41.379	43.5663	54.3541	60.686	42.6272	53.7235	61.9497
1553418_a_at	31.8231	3.35834	37.3237	43.4684	16.7938	34.5835	2.90173	52.5165	39.6301	14.5809	5.08558	48.2639	13.7209	61.5879	35.4653	25.2505	44.9337	3.42398	30.8972	11.6156	51.6821	14.4534	6.1613	28.4019	49.3578	32.7649	97.4036	61.4558	21.6815	4.64844	172.182	10.2716	53.5205	10.7657	14.774	7.72831	53.3274	32.0345	17.1232	35.6181	38.8571	61.1192	59.5325	7.50341	43.2377	10.6071	46.0325	9.35926	68.3247
1553420_at	0.600806	5.58524	55.9106	84.5424	17.7934	78.0182	28.3161	19.055	1.79494	31.4077	40.9063	3.24008	21.3878	48.3574	28.0195	27.2713	2.99666	39.9962	19.3068	42.6126	3.24045	7.12664	1.77563	68.369	17.536	47.0034	41.7271	51.4673	16.5967	64.0255	86.2561	45.6493	8.81871	61.641	15.6045	2.12649	2.35145	3.94579	1.93159	20.7086	30.1216	28.6187	3.81946	23.5603	30.8807	49.1624	1.58166	40.4876	52.1107
1553422_s_at	27.8412	46.904	66.9446	103.671	51.7316	78.0659	82.742	19.4507	45.3158	18.061	31.0232	87.1581	9.93306	54.2067	7.28324	60.62	5.69585	25.8344	6.38473	20.9093	36.4008	15.647	37.6219	6.88375	43.2115	124.534	36.6341	57.6836	42.7481	22.1226	139.765	79.2532	95.1598	137.173	64.3631	55.681	10.7482	29.548	18.9005	66.2252	56.509	48.5196	7.50475	24.5443	17.9593	19.5292	55.1778	52.2664	7.50159
1553423_a_at	309.754	63.3539	328.559	8.22222	169.151	131.358	324.951	55.7978	195.732	18.0372	173.803	92.7843	356.863	91.8051	177.054	4.37619	325.661	55.1611	233.643	2.02628	357.852	70.6958	490.939	43.9301	255.626	3.45462	25.8553	65.3278	329.942	19.2607	208.291	31.2285	206.658	7.54805	384.486	98.5417	325.736	78.281	214.274	22.9055	159.37	5.93083	232.984	23.8364	158.161	53.4395	233.161	41.358	510.874
1553424_at	7.59148	60.8988	25.1239	10.173	2.17571	9.83197	46.7835	28.8678	2.15993	2.87252	6.5655	31.728	19.7156	2.65767	1.87296	35.907	48.1039	2.79868	22.9156	7.42731	1.47384	26.5396	2.73569	3.99007	3.85035	61.2516	38.976	5.10762	18.4208	24.6359	80.6543	7.82587	29.693	33.5525	2.88904	28.4894	33.4044	48.1955	1.42806	26.0069	3.02376	30.2584	12.0245	25.1557	6.72989	3.03185	5.83308	7.20491	38.9199
1553425_at	18.6582	96.1175	32.4804	12.8713	58.1546	95.7238	72.9306	32.4228	7.40581	108.919	45.8252	69.5622	62.4097	56.393	38.8914	14.4233	47.0933	121.546	27.8743	36.236	13.362	18.7351	15.5842	110.208	7.99261	32.817	108.957	14.458	46.5871	57.292	404.95	84.234	22.0753	74.7543	50.6618	87.909	43.4456	74.0926	93.4476	125.147	51.8134	16.8886	45.6007	53.073	43.7595	93.2211	37.5863	88.7859	79.7609
1553426_at	66.4083	38.1358	3.93352	64.5603	34.1014	19.5527	13.1297	26.7894	42.9496	52.4686	39.2494	34.8744	37.3562	37.6545	22.0777	18.5823	4.21183	53.7782	3.1053	40.5845	39.0678	38.1166	30.6077	27.2533	12.2587	51.0545	56.2913	72.1008	38.9915	41.9791	79.1862	32.8353	34.7679	16.7755	48.6106	16.3032	7.64645	15.1476	46.6002	34.8156	9.30937	43.2163	34.5195	46.2036	39.8436	8.93969	52.6114	2.29831	6.07397
1553427_at	7.71012	8.54356	55.5609	7.18375	7.16927	11.3531	4.08725	6.64199	7.81733	9.48927	5.53295	9.93501	7.52351	7.22998	5.10471	4.55721	6.27004	10.2033	14.23	12.5586	7.80564	6.87974	2.98018	7.38055	6.22787	11.557	6.1265	9.66067	6.43622	5.57158	7.56642	4.21641	4.92116	7.82234	6.63156	7.41781	4.532	4.20398	7.03087	5.87912	5.07999	7.88956	6.81264	8.73061	7.76874	7.21304	5.20705	6.6067	5.24589
1553428_at	5.78101	53.1225	1.99594	9.69883	38.1359	10.6691	4.74893	11.4132	13.4029	31.5066	48.0273	56.4542	54.0637	4.55616	9.82254	22.8081	11.0429	8.98689	3.68571	42.9982	6.75422	27.7939	49.45	21.1198	34.7097	73.5935	26.6045	57.4125	3.81206	19.9639	171.584	36.549	32.3402	17.8058	41.2444	9.38478	32.5983	48.7181	9.02611	1.71752	20.7252	5.64443	13.4537	10.3836	35.8701	43.377	29.374	31.6339	41.0035
1553429_at	58.9289	48.4814	34.4408	17.0039	12.1523	10.6792	14.3571	41.4749	7.22494	14.6265	68.8828	70.9478	56.7859	57.8209	81.2685	13.586	48.3865	9.97008	9.00286	66.8884	25.235	80.0081	37.5216	18.5712	73.3658	94.003	63.2605	42.3652	49.8988	14.1436	15.551	19.6544	27.0938	27.5513	57.5103	35.8349	7.53002	37.0775	46.7498	41.5165	68.6565	19.0149	47.4375	23.1639	18.2109	34.6658	128.831	57.536	75.5567
1553430_a_at	7.33409	63.0057	29.2915	6.2167	93.5357	47.9757	95.8008	14.6946	82.2467	9.5448	5.34025	10.8314	40.9614	17.4994	7.41539	3.80336	4.08517	42.4244	5.19103	18.5955	39.9209	25.7634	80.6515	68.9458	1.94684	31.4821	32.7617	26.3755	53.4091	32.4249	235.963	60.3333	46.9969	12.5435	72.0436	12.2249	6.32977	7.66057	5.71463	7.35344	4.39522	10.6285	5.92227	6.41359	2.45881	7.83961	70.7149	62.954	83.8834
1553432_s_at	9.49185	23.7746	9.81257	43.6501	16.0753	97.2979	56.4103	17.7248	42.616	18.6218	51.8025	13.7199	49.8419	18.8426	103.863	30.6878	51.9584	9.1959	87.0528	5.62563	64.8912	13.2086	66.8201	65.1483	7.75564	6.3575	9.78065	58.5815	63.582	9.53614	188.166	5.87559	46.8828	15.657	29.4908	81.3833	67.3805	34.9153	91.503	41.8278	61.9711	20.2971	43.5686	40.1331	38.2259	9.83535	75.803	6.9619	9.64993
1553433_at	32.8351	82.7508	23.052	56.1681	0.979527	1.48423	22.3838	32.2641	14.5408	3.13294	38.941	18.1993	27.5231	61.8636	30.316	2.03266	9.11022	42.4817	34.7758	28.1523	40.3801	3.0697	14.8649	53.1697	34.1646	51.7287	34.9564	5.23664	2.01992	4.54433	30.9694	41.4684	22.7803	4.04057	2.30235	4.51454	21.6747	43.1823	43.6305	44.4087	21.2048	12.6598	28.4578	11.3741	4.66207	41.5094	2.2507	39.9497	60.4364
1553434_at	3.07599	35.8795	21.6761	9.32212	45.7154	2.26492	7.52931	7.64134	19.18	2.85782	21.2981	15.1651	21.0486	25.7696	18.6789	11.0068	3.7441	34.989	20.6815	35.8896	66.3806	6.6712	28.3844	4.70032	20.8517	26.9408	40.491	26.0117	7.78689	17.3158	127.736	3.54165	3.02935	14.0677	42.4102	25.0374	34.5496	33.8339	24.1004	31.8635	21.997	52.6951	14.2976	25.8805	50.0678	47.0184	52.5584	23.4774	6.04683
1553435_at	44.1815	31.1212	29.9816	95.0182	94.6262	46.0124	9.36178	11.4647	21.4788	42.2546	81.3606	18.5059	56.7112	8.6514	15.8057	8.49202	39.0491	20.4198	36.1375	21.32	78.9684	25.786	89.9419	35.8027	73.246	55.4817	59.5754	9.96616	27.9824	14.8953	281.194	11.2095	49.2363	11.3993	20.2251	12.7878	29.6234	10.8141	41.5994	12.2905	112.909	6.72766	48.3802	8.19125	66.7179	93.2989	91.618	11.2547	60.6859
1553436_at	17.9932	19.8128	24.6904	124.269	6.85551	121.222	8.68231	16.7632	44.0681	115.621	32.9149	86.3856	68.2756	72.7231	35.8325	72.1699	52.1736	110.877	38.603	36.3137	8.44946	88.1018	31.8494	17.1755	7.15649	102.306	66.7237	145.485	54.67	269.701	508.357	115.989	7.48912	134.178	33.5029	144.752	8.94866	188.452	35.9521	6.94851	57.9002	90.6727	31.4914	71.9757	10.682	76.5994	17.8035	119.994	10.817
1553437_at	97.6962	72.9144	10.2757	119.881	34.2094	24.9592	125.948	240.394	66.8113	209.754	78.0252	200.19	80.0159	151.628	131.801	60.1359	115.151	140.997	100.084	165.094	79.8576	327.146	57.9543	241.943	66.3268	157.775	122.795	94.9458	104.277	203.335	298.48	137.277	162.368	205.047	103.874	101.64	37.2289	166.418	87.8713	157.116	21.4067	112.547	41.6874	222.282	9.68858	141.672	132.45	173.605	8.39037
1553438_at	54.1842	217.632	99.7308	310.033	145.53	110.767	129.411	206.711	149.994	111.832	114.388	211.962	154.196	135.552	140.634	86.0036	100.517	172.814	109.39	173.762	142.395	225.248	203.575	151.353	107.741	74.8072	219.616	217.136	84.4125	83.2143	392.087	131.006	176.413	225.367	176.34	137.832	79.5558	164.343	39.1245	144.402	118.201	121.592	166.762	113.317	91.8826	146.851	193.82	73.8113	111.818
1553439_at	33.48	59.1222	22.8302	7.91071	92.6674	33.674	39.0769	71.7545	29.4048	5.78551	48.0217	27.1865	62.9792	77.1415	6.56337	17.9353	12.6804	47.1745	41.6606	34.8234	17.5935	62.7905	55.4931	9.5858	37.5285	27.5184	45.4516	17.1985	80.752	42.6987	184.705	30.7935	54.0164	7.69217	38.5147	15.2713	66.0959	14.3571	54.2887	39.8375	46.8706	44.5141	49.3509	8.56147	61.2897	85.3782	30.7522	13.677	41.3341
1553440_at	10.3115	2.47477	20.1591	18.6691	6.50552	13.1467	1.46875	53.138	1.00429	41.6722	82.5247	45.6544	2.64558	1.49961	32.2178	20.5465	31.1741	32.5125	23.6421	13.1508	70.7978	1.39564	13.3918	21.9446	12.5727	20.7351	30.7346	57.2226	20.4519	18.4552	97.0664	50.2975	59.1543	75.6747	30.9036	32.0508	26.576	29.201	0.533942	21.392	22.6988	17.2886	18.9679	2.11461	41.0488	43.0276	25.2123	4.4612	42.3089
1553441_at	35.2245	1.42046	20.2995	2.12817	4.72056	1.98852	0.799223	0.418577	0.225898	0.663679	0.455964	1.24459	3.25825	2.35354	0.521007	1.01219	8.10705	12.8584	17.2104	17.2226	1.14178	0.556403	0.869569	19.4469	6.21616	27.2838	0.519707	1.08726	0.258402	0.460287	263.496	9.08971	0.815342	1.34876	0.214517	0.337211	0.466373	11.0063	2.52031	1.94833	0.938546	0.548849	0.390095	2.5917	26.9051	54.6686	0.544929	0.50565	2.12964
1553442_a_at	6.48236	12.2578	6.99129	10.8328	46.563	8.96234	35.8316	20.4153	8.25163	11.444	5.56397	9.48022	9.12449	4.97379	8.18037	8.1903	8.66456	6.09666	15.4223	8.30464	12.6595	37.0125	1.91565	13.358	3.08277	15.3724	13.7273	11.7457	8.09476	6.97784	117.423	4.66845	77.8109	7.78155	13.3806	3.07722	7.45194	7.87653	4.60447	44.3015	10.4178	8.70051	34.1016	6.62862	22.8046	2.15928	4.29922	10.6741	3.89265
1553443_at	5.43865	43.0456	24.5694	22.2587	108.617	28.3445	13.7958	81.7641	67.7033	73.7794	58.3427	115.25	94.3698	97.5138	35.6292	10.5769	19.9122	109.323	5.56258	13.9471	7.14037	22.5947	34.3627	27.5414	152.478	105.162	45.5955	61.3898	32.2397	69.4916	237.581	142.952	18.5888	197.517	10.5224	36.4967	45.1559	96.3417	6.87254	12.495	12.5874	14.9032	67.891	39.3193	39.2221	74.1318	8.20264	42.9977	72.9581
1553444_a_at	23.0312	25.3086	92.6107	14.6805	7.91907	12.9549	17.1495	33.5643	29.3896	40.5907	22.1062	39.087	10.0432	22.864	12.0396	18.4734	33.1133	26.2081	21.3236	21.4212	20.806	16.5208	12.041	28.2645	21.4486	22.8115	53.3054	29.012	21.2745	13.7712	150.339	13.3407	35.9864	32.9489	23.536	12.8927	18.2107	13.1394	9.75242	30.5087	31.982	15.282	22.8512	15.7452	17.6606	28.4438	15.1685	19.556	9.54531
1553446_at	2.01105	1.85171	6.24203	43.9695	66.5398	44.1397	5.04647	42.4899	8.23092	11.98	6.37676	72.3644	39.8981	44.1228	56.6836	36.6081	22.1917	17.767	46.371	30.0411	28.471	25.8865	28.6142	46.4256	8.56205	24.0738	43.7786	12.3323	6.00591	29.5464	23.6741	47.5262	56.283	50.1678	43.343	44.4043	4.19666	57.2283	28.5571	56.1983	2.22015	38.1626	1.94365	32.7076	11.9579	3.05159	7.8392	21.4856	13.6319
1553447_at	50.3985	13.4853	50.8684	66.6135	8.35678	2.64737	32.0057	72.766	8.22327	94.3814	11.456	96.2087	5.86179	10.6775	3.05347	44.637	22.0114	11.6234	49.8238	55.3128	9.22554	11.0699	32.1687	60.1346	8.09171	77.8056	25.5422	8.01008	31.8307	5.03483	73.4469	55.9103	13.0078	47.0024	19.5394	29.7868	21.8394	52.6091	43.0973	55.6694	5.77302	69.8662	2.69578	25.9328	4.85977	63.7305	8.90116	47.953	58.9088
1553448_at	65.2389	2.73068	16.9058	41.8661	7.03599	3.62057	4.9996	3.44496	3.71288	2.42296	3.52546	3.90886	4.93357	5.24631	2.89857	1.86482	2.74707	7.72064	2.15978	3.02851	5.86261	5.0905	2.55667	4.4767	9.88228	7.43374	4.73047	45.1329	3.42818	2.31316	117.884	3.09808	46.4558	5.69011	18.1237	4.66196	3.57524	2.91556	3.82885	10.8116	7.78084	1.8349	5.21743	4.86315	2.37805	2.733	5.70993	4.07165	2.95026
1553449_at	36.2751	12.5897	70.8061	62.5621	15.4938	15.9351	96.9313	4.98762	28.0232	2.8812	30.5305	5.56011	42.3976	39.642	86.7599	4.61551	32.7536	14.3246	31.7411	5.03739	33.8618	72.1333	122.774	41.2993	37.9793	6.57431	64.5877	2.52657	87.6978	43.1928	4.99816	3.03568	103.11	50.3569	51.4285	31.4225	68.8102	2.28206	42.0924	36.9309	82.5791	43.4677	38.6678	24.3664	42.7756	20.6816	50.4237	26.7254	116.284
1553450_s_at	25.4305	34.0974	7.1956	13.2294	9.79975	2.88088	15.8636	83.3874	23.9333	59.7064	1.96521	12.1387	28.9441	64.5296	12.6447	9.78388	30.7066	43.5904	5.10052	29.2862	39.7489	16.7397	32.9036	24.8411	29.3624	38.0057	5.56664	8.3542	53.0794	63.1701	376.764	57.5067	55.2863	61.765	31.504	11.0814	6.93003	53.3991	20.6984	21.2564	17.0569	12.5164	35.6539	27.2157	73.0905	71.2705	7.72348	21.7397	17.1896
1553451_at	6.0151	45.287	2.25794	7.14428	48.1534	8.12906	5.81189	12.1425	7.08896	4.68629	2.09323	2.77379	13.979	19.6028	7.9355	13.1154	1.97202	13.4627	3.87294	11.0978	7.07381	9.47311	2.89706	23.0748	28.6708	12.0743	8.93862	8.81669	3.90684	8.58355	253.525	7.13205	48.9034	12.5101	8.64476	41.4167	4.52407	34.124	33.1866	4.73703	2.8243	49.5228	16.4761	8.11639	2.77529	6.86482	2.09558	3.21185	31.3931
1553452_at	38.9859	85.2818	21.3721	38.2287	59.867	37.3972	60.5375	55.904	57.1132	22.3778	45.7842	96.0233	82.6316	68.1916	29.3072	60.876	7.89569	26.287	78.3156	64.2075	28.4605	72.4432	46.788	52.3418	28.1973	106.23	17.1046	48.4872	36.5196	20.7177	70.1778	58.717	50.4552	83.9477	38.6273	24.9204	5.25283	52.9753	19.8126	42.0906	41.0267	72.1538	37.8997	83.1952	37.1392	61.7893	39.3545	59.5884	46.7606
1553453_at	30.2139	35.1124	57.7192	90.6212	56.389	59.017	59.8457	102.573	10.9459	67.0198	66.916	83.9199	63.9014	78.4045	50.7567	40.0599	36.8928	58.3909	12.3707	47.8558	45.9988	165.426	22.685	72.3807	62.4714	97.8611	84.3057	66.4054	40.7447	107.517	813.808	107.794	47.5522	124.614	28.9426	66.7076	61.9144	76.2582	27.5321	87.4989	37.3098	60.5971	46.6935	73.784	64.7107	83.3965	31.2366	57.4995	53.2315
1553454_at	11.546	4.56712	33.9857	3.38112	17.4784	24.8399	2.63225	52.4814	4.38469	42.1994	3.41264	18.6972	41.6176	4.92341	33.6117	1.43334	6.7618	36.9757	3.61471	53.2339	4.01448	9.27487	15.4375	16.1356	26.5326	36.5101	16.0208	3.49191	14.1316	33.3307	110.975	40.3121	60.7486	8.94093	23.1763	19.393	40.6386	16.2992	13.889	4.35245	23.8288	2.18527	3.34203	17.6114	3.49175	37.3542	22.053	39.5111	5.49358
1553456_at	2.91549	5.11245	8.00531	9.28121	24.9314	3.98953	2.67042	44.0985	17.5278	5.84652	1.87732	49.1386	10.8065	31.5836	7.64974	28.4897	6.30247	14.5174	21.1443	46.192	11.9161	31.9564	33.4856	55.7336	11.8421	3.21556	2.48774	36.868	20.6322	41.7088	170.976	40.7923	40.0795	14.1499	17.115	5.06892	5.01429	40.6209	32.0688	2.0223	41.4382	13.3642	5.95466	23.9131	12.5672	36.2954	14.8458	38.958	3.6445
1553457_at	6.84236	28.4653	4.15092	108.213	20.0864	54.9702	6.83168	10.2102	4.81601	8.65202	5.41443	5.87419	44.9723	11.0756	29.236	7.80573	6.61076	6.97359	6.79812	10.39	11.7857	18.6229	12.6702	9.20869	8.07531	12.5729	8.34595	10.1057	80.8606	7.18869	126.147	6.87306	7.38752	6.42728	12.2391	15.4183	7.77231	13.7613	3.94084	7.23195	6.22956	8.9	4.17426	7.38502	14.1876	13.7992	6.56033	29.9793	6.60332
1553458_at	141.491	157.137	123.401	183.275	43.6264	101.329	44.4712	133.574	235.103	166.341	103.972	120.885	60.5585	64.6427	81.229	134.786	55.0054	112.187	120.28	114.251	174.958	138.325	124.489	176.108	61.6107	185.801	141.777	164.177	92.0573	96.0841	590.842	178.05	74.7647	206.592	115.23	114.646	98.8663	135.547	36.653	77.0264	19.5476	61.3962	134.857	163.82	56.9434	203.929	180.949	230.31	138.131
1553459_at	9.29585	7.54598	3.94818	19.0547	12.2203	6.97771	11.2839	3.92141	6.81121	9.21646	4.71299	11.5145	11.2932	3.22079	7.45794	3.66798	7.73828	6.81064	4.75747	7.58542	8.29079	40.7208	6.64845	15.7737	14.372	14.3434	9.62887	14.8693	3.51208	42.7794	354.891	24.9383	8.05029	16.2018	6.65885	7.0246	5.27318	8.13025	7.7157	23.6265	4.91711	8.95269	4.66669	6.02465	6.61387	9.74336	8.72553	12.3422	8.80715
1553460_at	3.73835	5.50868	41.7406	8.21914	18.6173	28.4418	7.10567	4.81922	2.66389	8.05128	9.97928	6.92957	6.03124	3.07268	7.41826	13.0057	44.2653	4.14764	4.66671	3.88259	4.29934	6.2451	6.56759	7.07663	11.117	15.5563	7.91146	69.1352	4.98965	5.706	124.152	9.79577	15.4666	5.68038	16.0217	16.441	11.1702	7.44215	2.57456	10.9943	8.34974	4.09844	12.2323	3.78155	3.63251	49.8251	38.1392	12.2124	8.18625
1553461_at	5.79396	7.79234	6.93938	12.7298	37.1179	5.7775	12.5693	9.17979	5.32773	7.85346	3.76547	18.8925	22.3956	35.9282	24.962	4.90434	27.4017	20.4558	18.8086	3.27303	38.4161	58.3803	6.59542	38.0198	3.99671	39.3132	14.3935	33.5685	15.7108	6.32647	246.339	41.0872	31.8779	23.4491	15.9276	16.7699	17.7515	3.46005	13.9423	41.3604	3.49488	23.8427	28.7279	3.16238	3.12031	24.6212	29.8832	3.20019	15.9913
1553462_at	29.1676	9.10669	26.8438	4.73252	3.93526	3.67638	32.5442	41.2377	1.84565	33.8846	2.974	44.9953	43.6108	5.79228	1.31719	25.8767	13.9555	22.1258	18.752	6.90347	57.5966	3.51925	0.839297	37.5398	16.3709	8.26185	9.90166	38.1691	0.7496	5.19581	39.7152	0.902343	6.15521	35.6679	16.152	22.9851	5.43717	1.33502	1.76028	40.8227	13.1008	2.4599	9.96681	36.7156	26.5519	50.6178	9.18499	26.0571	35.744
1553464_at	68.3432	29.9112	41.3132	218.782	11.8069	49.5863	27.1922	27.1908	6.57291	71.7875	20.6115	23.9518	56.011	14.0111	21.2782	14.5002	15.673	19.6414	18.3653	26.4978	31.0709	30.6691	71.4762	19.9981	27.6297	12.0329	8.03853	15.869	15.4447	26.4037	188.137	17.2673	27.6418	89.9811	26.2415	64.7515	23.0354	14.9383	16.0455	23.7583	49.4654	23.3693	62.3344	17.033	66.7423	16.5354	27.0178	30.1404	31.7428
1553465_a_at	3.51278	9.16061	2.08257	6.60234	24.5938	10.7308	4.80559	52.2732	4.39574	14.877	4.02824	2.91498	2.1112	20.6832	11.0983	2.05908	10.0091	2.03802	7.40327	7.46697	27.0739	7.90195	7.91486	15.3401	3.8027	10.6309	29.8981	10.9695	13.8785	15.9719	237.519	83.0593	3.3484	15.7691	6.58766	6.16777	8.62865	6.39604	31.7948	21.4955	20.0135	17.8972	30.9407	35.1257	2.38875	11.2952	3.83363	2.5964	7.33864
1553466_at	6.26469	55.0794	36.9804	177.905	111.9	84.6607	107.477	82.6034	92.7681	92.5713	79.5837	91.0909	106.828	81.1184	72.601	54.4111	87.5303	92.7876	45.0118	117.729	117.374	142.918	92.7296	110.52	63.3965	149.689	91.9157	109.485	76.9361	97.4488	213.043	125.734	73.3098	121.785	108.461	40.3381	71.4042	87.2036	68.2511	44.6936	78.2657	88.5689	71.2831	95.3865	4.98952	99.1098	108.157	65.7037	153.595
1553467_at	29.0046	8.70115	1.28903	77.6925	11.2659	40.8794	50.5135	61.8225	18.9136	43.349	27.229	54.3129	58.2177	23.8269	19.6377	40.433	16.1642	26.952	1.85694	50.6582	54.0449	75.0938	4.31351	5.05598	7.71135	69.513	54.0714	2.80173	29.2274	26.8041	228.285	11.3142	19.2072	61.6004	63.9764	16.2325	34.8342	36.6342	6.07702	14.4138	18.7407	28.7555	16.4229	1.6002	25.1878	63.7285	62.5431	2.72901	4.72748
1553468_at	33.6389	8.7391	5.14524	62.8002	51.424	22.7501	6.48522	22.5098	3.77374	9.61544	22.1607	6.36043	5.70426	28.6842	3.61649	19.4674	31.2131	57.4984	5.71407	42.2241	1.53546	69.9797	5.47643	2.34793	20.8328	5.31837	18.3662	30.6088	49.1365	3.81021	15.0989	14.7086	4.93853	3.50424	7.13835	17.9149	11.4765	9.58277	2.1889	37.319	13.5463	4.43921	38.8387	5.65807	9.31759	3.02043	51.6342	6.99595	28.2843
1553470_at	18.2769	63.3427	31.2261	44.0037	78.6279	24.4478	72.9014	11.0565	48.5036	12.184	55.4363	44.9307	47.8402	44.5052	43.2704	27.5126	32.8006	6.39893	48.0678	43.9494	41.7834	111.327	23.1034	136.417	35.2105	5.0457	80.4355	18.1212	50.5198	34.3494	329.549	41.7497	35.4825	14.8074	40.8048	31.1815	33.825	37.9286	33.3636	32.6821	19.475	72.9502	58.2247	14.9709	15.4738	29.8802	33.9692	30.3793	59.1597
1553471_at	48.9203	6.77858	12.0897	122.402	32.0896	62.7568	40.5898	47.797	4.08055	33.1062	9.29781	6.28804	1.11886	11.8463	53.674	13.0646	16.1618	32.9475	9.04315	4.29521	26.9593	3.96426	54.7128	44.2606	14.7602	9.38596	34.2476	12.3483	35.1267	22.6139	145.648	45.0525	30.8955	80.5179	8.68703	58.9273	1.72324	23.5675	21.8173	50.0935	31.0853	15.8108	26.0813	17.9355	98.4663	14.2441	5.4888	49.9847	21.3053
1553472_at	5.46875	30.6001	37.6004	8.8923	6.05004	5.01194	53.0482	89.7874	29.769	14.177	2.78533	33.5052	3.57937	3.93602	6.20182	15.3979	23.0924	10.9483	3.07096	31.0151	2.21837	91.442	49.5644	4.71091	38.2183	10.0702	48.7454	58.6318	35.7069	61.1615	411.055	31.2404	35.0268	51.6351	14.0747	4.78218	2.28742	4.96951	53.1863	19.5724	47.6261	38.4141	19.5183	32.171	36.6155	40.5035	26.6269	6.69686	7.80787
1553474_at	9.65089	1.39967	40.9406	50.9772	26.7721	35.0155	13.8272	33.1368	12.3495	29.2744	16.2031	2.07252	0.422744	19.3406	0.321366	13.2298	23.4007	22.9796	9.39632	28.79	15.5544	22.6963	1.70037	11.0017	1.34749	2.4738	5.48724	3.49121	1.14255	4.05873	139.386	5.87356	19.7551	7.58965	24.4994	9.00025	25.374	3.66655	1.47287	11.3335	12.3898	3.20749	38.3819	14.4163	1.67111	3.66383	56.1578	7.92731	33.2972
1553475_at	6.01262	18.7639	7.32315	16.4126	7.50424	11.0744	45.979	14.4753	14.2415	32.0153	8.19096	10.8281	15.5461	4.68941	2.82607	25.5051	3.8594	17.2176	47.0084	28.0992	6.98041	13.7811	7.03259	7.4971	54.3515	23.3179	15.6079	47.4835	4.30838	18.8859	113.637	6.887	9.63291	7.32464	11.2499	10.4348	3.7344	10.4497	3.7722	4.75721	13.5316	4.72984	2.19741	27.1114	18.8299	29.7157	13.3204	7.80366	10.3885
1553478_at	42.8747	19.3174	6.18232	24.3033	4.83857	63.2727	11.1401	47.7405	12.527	3.05947	10.7873	10.4643	15.096	14.4778	44.423	12.4781	22.4439	7.86745	11.4458	43.5259	23.045	19.5565	8.93351	12.748	52.2276	10.3386	18.5998	14.2133	15.6651	12.3828	475.732	15.9039	25.698	14.9295	11.5301	26.2498	25.6336	19.9217	2.14109	28.3319	49.1398	17.6854	11.9509	12.2938	2.2744	46.1784	16.7941	11.0726	59.3055
1553479_at	75.2811	61.2046	68.9045	41.2137	58.1676	14.3927	66.5781	50.3006	45.7838	57.1551	85.3161	53.1794	51.7788	42.4137	65.426	33.2887	31.573	44.3815	49.0118	18.2549	30.1479	66.2627	46.9739	100.714	44.1067	49.0391	15.799	41.7563	34.4875	48.4743	247.426	14.4182	43.5333	29.4524	51.892	58.2796	51.3019	64.9146	67.4781	24.2842	108.726	48.2068	61.38	34.6678	139.952	33.4209	63.0521	17.2657	64.6343
1553482_at	1.25925	11.3569	3.83443	3.29197	4.63201	4.98479	4.80498	5.10601	5.05564	5.40116	2.68492	4.71105	2.77891	4.14566	3.42058	1.54098	30.8275	1.63359	6.95366	2.84666	2.12403	30.4062	6.95963	3.26595	1.71353	3.30044	3.60994	5.26796	2.83081	1.78403	555.345	2.72664	3.29814	3.59795	2.595	3.45426	3.23802	1.39668	2.55312	1.84197	2.4527	26.7061	6.63596	1.84142	9.36025	5.73332	2.19005	2.46244	4.76599
1553483_at	146.02	35.7523	34.813	13.789	18.0441	41.5621	48.9673	8.15851	14.1791	75.9452	15.1118	14.0449	7.64227	22.3543	8.21247	8.0641	14.786	12.4721	29.9989	11.158	120.311	103.386	18.3247	119.575	13.9993	156.642	76.2584	21.2398	52.6183	8.44903	157.768	13.5886	8.88793	124.216	13.9749	63.789	7.51255	34.8531	48.0967	41.4256	29.3927	93.8161	10.487	99.4889	18.4963	8.99832	36.2109	11.031	35.4002
1553484_at	22.7115	38.1503	15.6044	66.0766	43.6181	45.8901	5.57078	50.2529	25.4407	15.4172	19.1924	10.4004	29.1665	36.0831	12.4022	30.6694	43.0015	37.4892	2.34167	1.87533	48.8067	26.7072	45.3891	31.8812	25.3947	38.0132	26.995	6.10538	40.725	33.9142	78.6668	20.7814	38.6595	46.9728	14.6837	35.1404	16.4954	25.0104	18.0688	41.1059	22.5943	40.8666	12.5661	19.3842	25.7622	6.23521	17.4305	18.5789	50.8619
1553485_at	26.1856	4.04909	8.03362	92.0098	69.2971	6.77159	31.3073	73.9315	4.988	55.7712	36.33	5.04595	8.57708	43.1553	4.45509	21.2704	6.54472	50.729	50.7497	22.3274	15.8581	25.7462	8.41521	17.6079	60.3973	71.0793	6.52574	10.117	5.67812	3.88382	372.415	16.2543	9.27675	42.7769	4.4032	27.8737	5.21149	3.75062	14.0796	66.098	3.43292	4.93167	2.43892	5.46676	7.85654	4.45785	3.40127	36.3075	26.076
1553486_a_at	26.9031	49.5109	4.44874	49.531	4.5229	10.2851	4.16609	33.4761	3.08247	9.32721	28.2489	5.05366	1.21475	28.9587	8.61589	26.9755	9.04291	4.75336	3.88562	8.41696	51.3242	10.5753	5.34167	13.4216	34.1249	11.6966	22.2269	4.61855	36.3841	8.70693	166.804	21.7278	4.23698	7.01888	2.38351	16.137	18.1541	1.65939	3.25699	18.4754	22.201	52.2376	30.0051	16.7828	4.24311	48.3564	30.5961	3.38658	5.17362
1553488_at	7.64357	8.72632	8.58512	11.4067	12.7846	5.34963	9.60906	10.211	7.35296	10.2749	6.71628	9.54218	7.56556	4.92165	6.43689	4.65747	12.479	7.94755	7.40072	4.63583	7.35658	17.5412	17.2308	13.9718	8.48068	6.03512	12.1441	9.28365	7.10594	7.01622	128.61	4.82345	11.1324	10.686	7.20002	13.3582	6.34928	8.19217	6.92448	15.3296	4.3242	16.1999	4.54417	5.42648	9.46503	5.52763	15.272	5.0527	5.76659
1553489_a_at	11.7813	8.12957	6.20585	4.09466	6.70369	24.8383	5.33553	8.87454	6.83411	2.65615	2.02723	8.14242	7.61093	2.44686	7.69514	8.18928	10.4102	6.01824	1.93888	4.06536	4.15573	11.3367	10.8603	15.9286	6.40475	22.3826	2.15009	5.91026	13.9111	13.6238	23.5585	4.46048	7.69182	9.48134	12.9771	12.2329	9.80118	7.64995	6.39075	4.27174	4.33001	6.72366	10.1746	15.7474	3.01427	8.6934	10.7575	4.16054	14.4405
1553491_at	34.3829	45.7482	84.341	138.227	82.8404	87.2508	52.2282	26.3957	28.706	88.4099	40.0736	86.9723	61.4778	73.4195	10.574	11.5116	23.7458	11.2798	15.2459	61.6493	4.60955	82.6788	52.908	73.4193	48.3674	85.79	50.858	17.019	47.1834	48.6569	155.862	76.8327	19.2918	52.6992	46.1883	43.7483	45.6604	40.676	51.8382	2.96905	37.0428	4.38412	3.1242	35.7183	90.1323	56.8284	44.8797	34.6788	18.96
1553492_a_at	10.1984	64.9163	39.9254	55.637	4.01664	19.9501	7.5394	30.2104	3.56953	2.45672	13.3395	34.5701	37.4685	5.15332	30.2201	40.3419	2.23935	32.3517	8.73316	44.1616	24.1187	7.30835	5.42084	44.3147	38.6489	31.4209	33.704	70.3807	5.20571	17.9404	145.456	6.3814	6.58869	55.8656	6.82797	42.3858	2.25213	48.9286	39.4759	55.7238	13.1529	5.15971	9.82083	60.3445	5.55053	59.3973	10.7151	41.1015	32.5873
1553493_a_at	94.2698	133.016	13.391	43.7745	111.668	76.8862	31.3946	101.423	92.1432	14.494	75.2943	91.7388	62.7593	64.9516	107.334	71.751	79.2738	79.5826	82.2834	127.312	128.604	137.857	128.555	82.5982	57.4058	180.273	22.558	198.385	86.4684	70.1051	272.178	155.805	62.2856	126.283	124.844	66.6129	43.2736	89.2537	60.5947	66.3457	91.4545	69.2413	45.2419	130.65	40.5277	122.361	102.228	66.7453	50.836
1553494_at	0.824884	24.8694	14.9517	8.74311	2.94434	2.31099	1.32282	2.69713	10.5348	13.606	3.67426	18.2795	0.954011	1.65831	0.865391	2.42577	1.20125	1.48953	3.1494	1.7148	1.11566	3.54699	0.46742	2.98115	1.17423	7.87971	2.14495	17.7478	4.88147	2.52266	429.792	1.86215	2.73422	4.69685	0.763412	8.49198	0.797916	1.62523	12.5533	2.45837	3.39065	9.01181	3.41279	1.21821	21.6574	1.45913	36.4837	4.46262	32.663
1553497_at	3.74616	5.79496	8.93585	10.0386	11.6331	3.29454	3.00693	5.41522	31.7522	3.30549	8.52485	7.46999	42.5229	1.72389	6.9671	2.23533	9.27368	2.20452	8.13697	4.04873	4.32423	38.2346	6.93686	4.04119	24.6063	10.2812	2.32926	1.20993	4.00967	14.7149	517.179	9.27654	50.9414	3.65783	8.04767	1.82196	7.35139	7.73362	2.07903	1.90103	8.43654	1.08155	1.23498	4.72589	9.64321	4.22379	6.90023	2.32059	11.9884
1553498_at	27.7456	6.65041	40.5224	85.093	26.508	114.169	15.8697	72.2333	52.5873	47.4182	61.4647	56.4479	42.7169	70.7214	69.0662	48.233	28.0289	10.6952	30.9224	29.3376	63.2307	96.8478	45.6767	89.7355	5.76371	101.366	29.2574	2.79968	93.5853	27.8522	162.604	5.90557	91.6065	128.793	57.8469	40.8965	36.8135	44.7476	49.8907	2.68316	46.2603	70.1426	83.9961	42.4406	83.8713	14.5761	37.5753	34.3913	12.5163
1553499_s_at	24.7327	38.5197	79.7268	226.832	123.484	85.9915	136.899	205.608	73.318	164.711	10.2481	109.548	142.873	130.776	34.3336	89.3643	23.225	167.738	82.201	114.634	37.3552	117.926	35.138	228.615	140.849	121.524	111.843	145.009	81.9521	77.0811	303.861	141.265	160.701	238.6	41.52	91.1658	48.361	53.785	40.8339	112.432	169.057	120.517	81.7188	183.297	124.393	146.085	38.9124	167.302	8.7557
1553500_at	260.294	98.7835	63.721	39.2772	4.09094	24.675	192.882	153.932	5.79213	10.68	34.8466	138.149	13.8811	136.641	6.39683	72.1249	57.5457	21.4763	195.895	79.883	279.478	117.468	64.5195	155.064	44.1425	35.9813	17.5463	129.595	69.9044	56.8918	246.114	139.274	5.89063	46.6215	530.632	155.608	257.717	155.859	209.443	110.729	200.136	129.39	306.5	42.2697	79.7649	18.9601	26.8281	126.019	5.92748
1553502_a_at	38.7628	2.66271	7.6107	7.26115	2.70755	18.4653	60.5819	2.06258	25.0437	34.2792	1.91558	26.1956	2.79753	47.0791	2.81825	2.02411	39.2512	24.7316	1.29172	26.4344	10.0024	2.37332	28.852	10.6625	21.6766	14.885	93.7816	7.6754	3.95817	2.65617	116.034	3.64069	10.8353	62.1467	43.7363	39.0089	34.2476	22.4362	28.4656	6.13632	57.0467	18.8022	21.6612	19.78	10.1928	4.41313	17.5012	3.24497	29.6501
1553504_at	44.8817	126.266	70.7924	74.451	20.9748	49.2046	41.1913	45.1169	2.93964	36.5664	45.8802	2.87096	27.8754	67.4809	36.57	60.5737	16.6317	51.3956	63.1486	50.8601	24.526	35.82	46.8578	63.8937	75.8524	29.0667	47.2946	38.8195	46.7251	24.0652	31.4489	62.5511	25.2881	50.0977	13.0844	41.9086	22.7125	14.4038	56.7525	16.0184	39.0883	3.90395	42.6773	8.62923	55.5554	32.6068	28.8401	8.78413	32.4708
1553505_at	8.1775	38.122	3.34069	115.472	15.75	57.9897	9.48553	6.2353	38.2247	26.2427	11.3969	11.56	10.4691	9.2554	50.9015	4.85608	7.92749	13.89	46.6617	54.7505	52.4211	169.451	25.0071	58.6346	5.73028	6.7998	98.9527	54.9173	8.7304	61.6735	13.9722	52.9438	7.25346	75.5596	34.5847	5.776	51.363	13.6444	25.8732	8.24078	5.63967	6.66637	26.1311	38.6906	45.2384	56.4142	27.0892	55.6923	70.2907
1553506_at	39.8569	67.6977	21.0737	76.8103	23.0063	13.046	47.2282	38.822	22.3706	23.7045	55.0496	84.0823	57.5871	37.8393	30.1573	82.2225	47.5796	67.4362	31.3257	45.8551	8.81138	88.0274	3.48946	64.5089	115.461	109.689	62.1809	64.8503	19.6728	5.00782	142.206	63.1953	55.7547	66.5783	43.5468	23.8895	38.8937	64.1781	16.7293	31.1212	71.3835	34.6152	15.5384	33.852	34.2836	63.8599	9.105	70.8159	28.5617
1553507_a_at	35.9522	136.758	75.6397	113.838	65.3028	121.616	23.4978	124.581	24.0048	163.305	51.8108	110.348	88.7054	118.955	45.2507	137.518	83.2329	84.1331	120.513	38.1392	106.447	176.12	98.0155	154.872	94.4684	132.922	66.8833	138.203	71.427	110.496	133.133	161.502	96.1004	196.721	95.2628	154.552	80.1232	113.032	75.1576	149.108	111.911	129.931	78.6896	89.0941	107.806	170.827	114.742	135.409	72.2495
1553508_at	4.32346	82.9527	47.1945	64.6551	19.333	10.645	7.97554	40.4425	17.6067	4.26188	37.8393	117.317	20.1688	10.3451	23.8456	7.12892	24.4363	8.75713	34.8068	9.79645	25.4035	18.1081	34.2658	16.7027	37.4073	14.777	33.992	52.1639	40.5986	36.5126	117.422	27.7453	54.7968	70.1484	52.0922	17.1884	31.7612	23.5546	21.5765	8.19409	37.3245	6.92915	7.40458	43.6951	29.8216	2.74761	37.6486	7.23104	56.4079
1553510_s_at	249.673	324.372	293.764	149.806	246.225	321.652	289.554	240.348	306.351	265.141	227.115	301.718	219.828	236.731	147.604	256.483	173.706	204.352	261.123	308.836	137.027	308.343	345.579	192.047	266.292	158.09	192.163	182.626	354.635	335.291	965.693	369.765	273.11	231.299	317.04	308.258	276.626	338.608	165.2	243.635	184.887	382.854	215.044	287.737	239.066	275.624	262.49	208.498	187.844
1553511_at	118.924	11.9747	28.1875	43.2928	7.50972	80.5465	85.0582	75.5709	17.8963	18.3038	107.368	14.9696	75.1879	16.1782	10.8598	27.0833	35.4165	16.0789	79.5007	14.6243	69.5359	30.2168	77.9272	88.5278	10.2429	22.2532	15.6843	22.1557	69.6663	61.7591	61.4484	113.509	23.1804	28.0859	25.4222	76.8868	16.9304	18.5858	52.2987	29.9902	20.4866	51.8965	45.9514	48.6791	15.5151	58.6785	63.0427	85.054	33.2484
1553512_at	32.8253	52.0693	4.25272	110.268	55.9931	4.43306	40.5832	111.222	33.0994	44.3134	44.7196	28.5014	22.8732	35.1884	2.42456	30.3552	48.9158	97.8511	47.0378	57.8438	4.90836	58.6762	5.51502	54.1347	43.5799	70.5853	66.5595	69.6942	34.3959	27.4692	176.909	61.1381	13.2666	60.7304	31.5038	15.1838	48.6374	31.6826	28.4129	8.51372	6.92483	83.8036	8.31323	53.5	46.3287	63.4794	27.4807	42.817	45.8186
1553513_at	19.4364	1.6403	1.05458	21.359	1.98275	2.73276	32.2437	8.14209	24.6719	20.1609	3.60843	55.4398	3.94887	3.6724	6.36117	29.6062	7.18387	6.39888	21.2649	18.2454	74.9702	16.1704	2.75059	4.96986	18.0518	6.93801	29.9201	7.30864	43.5495	70.5335	157.336	8.83739	3.94652	6.6917	34.09	27.8955	18.8263	3.84659	20.5006	20.1705	3.19997	53.7392	9.64305	30.6661	12.8136	27.6935	32.8441	5.49007	8.3852
1553514_a_at	38.3663	79.096	2.3582	30.1143	59.7159	61.1127	47.0763	77.5275	38.9224	30.0826	55.5713	45.8215	20.0045	25.4094	29.8486	26.4021	17.2557	56.6813	53.386	81.8416	63.878	47.2633	40.0164	79.0284	77.2153	62.0888	38.774	56.2444	48.4517	43.2776	137.036	20.5221	50.9732	51.32	46.0714	66.0322	43.8646	55.8452	19.7756	29.3083	51.9753	18.9435	46.8324	53.2421	37.1052	63.9375	18.2729	37.492	92.9797
1553515_at	6.00223	30.8069	58.0981	63.0064	9.97215	19.137	62.1662	99.8728	5.82841	46.8581	38.7456	21.2642	12.8626	34.5057	13.2186	17.606	14.8994	40.0885	13.9355	41.2034	5.43845	116.333	26.0576	23.3061	57.9671	64.8473	58.9983	33.8938	10.2317	24.3115	230.55	6.677	14.6616	65.3781	6.75544	17.9607	35.0132	65.268	8.96877	36.0129	19.8692	74.4618	40.5194	85.132	4.01727	58.5335	6.04687	21.698	62.0778
1553517_at	7.59812	7.19733	6.02314	10.5063	5.02218	7.51611	5.85593	11.3666	4.47984	10.0306	7.48226	15.9875	9.17359	12.2027	6.28585	5.09107	3.70683	12.1696	7.15607	13.3947	19.6704	26.9207	14.8702	10.0671	10.2709	15.009	15.4602	20.9518	7.64941	16.6606	210.957	23.1914	23.3148	16.876	8.15234	10.5711	7.93524	18.5623	8.50138	7.81929	6.23981	17.5891	7.21943	22.461	49.9326	12.0799	12.2888	15.9696	8.98802
1553518_at	4.46939	17.3973	8.19864	50.648	63.4186	68.1631	12.1072	46.7498	9.51781	6.57533	17.0632	4.23041	25.3996	9.75366	35.4349	57.4045	84.6038	6.56721	47.8923	9.46232	6.57528	10.7788	65.2898	8.43869	41.7885	46.9635	53.6632	13.7196	43.414	17.9276	62.2542	21.3967	9.70716	12.7083	16.8463	12.4166	57.6354	64.1088	52.3776	8.52297	5.27927	24.6257	32.7416	8.71442	9.48788	8.98041	16.7701	17.9546	12.4026
1553519_at	2.8368	2.27565	0.90233	14.4884	21.783	13.5085	19.075	8.26151	1.26038	26.9812	0.524297	26.8996	3.81551	1.64109	0.512211	1.87603	2.19967	0.92866	2.06803	2.29771	1.04354	3.60003	32.7532	2.09547	9.26103	9.65239	3.05329	3.35184	28.3027	15.1181	70.2912	12.6529	20.1568	4.43992	12.915	1.26794	22.2552	17.6727	0.601596	1.55977	2.34103	1.28685	26.3823	3.95389	26.8187	0.782974	5.48333	2.6194	1.98781
1553521_at	4.73735	45.5957	19.9105	11.1097	7.79766	14.4076	3.25807	52.1025	10.685	25.2068	41.6542	18.202	38.5503	16.4439	4.94504	47.7334	45.8812	16.6983	17.188	22.7551	5.77996	34.157	2.81164	75.0227	11.7989	53.1587	5.54447	33.0161	60.0454	49.5837	332.053	22.0042	57.2947	50.0769	3.68087	55.7977	24.9561	2.34714	1.51568	52.0397	56.1113	7.29801	15.308	33.1212	37.1639	32.0163	39.4521	8.10187	1.10952
1553523_at	34.7388	105.681	35.4594	23.4491	31.6912	6.64173	26.7917	72.0022	23.7521	52.0851	11.6393	30.405	53.9949	17.0425	52.7981	34.9896	49.5292	69.2321	7.70404	33.3128	43.0708	60.2636	47.7721	10.4701	72.4505	111.976	36.2775	48.7653	57.3809	41.4094	181.135	97.1807	49.4221	70.8227	71.8605	55.8371	4.11573	36.239	7.12753	44.9526	48.2803	28.9995	18.0793	33.175	69.64	97.7572	69.7675	68.3314	39.755
1553524_at	3.27506	31.5369	7.99252	34.4243	48.7672	7.21135	62.5923	37.3066	17.6875	7.89793	4.00774	5.76266	5.14841	65.9656	3.98381	14.4569	20.7549	9.03688	28.8775	6.28463	6.12364	6.65061	13.6775	23.7382	10.8392	12.4089	59.1566	5.31548	17.1973	3.58086	128.235	6.06931	13.3201	12.2453	5.92104	48.9685	3.48855	7.53768	16.6007	48.0709	6.28984	25.9566	2.48989	7.05711	5.2968	5.95348	4.32946	39.2857	4.85559
1553525_at	7.23738	78.5432	66.6934	72.7006	96.2794	11.5347	18.2471	50.2364	34.6709	85.4167	14.4708	8.10138	41.8038	39.5717	62.1332	19.7441	13.1647	55.3294	37.0025	88.1204	14.8136	51.328	18.1124	68.7844	12.0287	17.649	18.9049	102.532	14.0298	144.805	139.154	87.4716	53.121	15.5763	21.5749	15.2646	11.432	83.8418	8.25578	44.037	54.7747	39.6549	21.3249	65.5061	114.655	58.336	19.3027	8.35489	4.68054
1553526_at	20.7444	19.6006	57.9905	31.0363	119.963	77.4878	83.4059	20.9135	31.9542	19.2706	53.5725	16.4662	15.3917	12.7738	60.774	22.2343	85.9921	13.0782	15.5264	131.387	66.1045	24.1983	152.034	30.3212	69.1731	109.456	29.6178	25.1748	17.8739	67.1724	337.839	12.917	148.449	96.942	173.069	36.9309	12.0647	103.399	8.24664	26.5521	42.2468	19.9709	31.9141	25.0289	17.8401	56.1167	40.2266	83.1774	49.9777
1553527_at	52.9061	6.90498	71.6883	91.5583	70.5767	87.8081	24.8502	76.4538	43.1106	60.1221	24.2277	7.20465	64.2518	5.33085	32.2469	24.8444	6.63845	9.46742	36.9447	43.6377	42.9993	62.9423	77.0817	110.289	37.7009	78.6325	37.5382	88.545	42.0016	47.555	443.795	81.4809	37.7963	75.1406	44.6323	20.1843	25.6176	4.78205	44.4508	23.66	54.0102	78.1877	35.4195	11.0361	24.9979	65.8187	79.0038	21.1284	2.9371
1553528_a_at	279.924	140.967	223.793	190.19	154.986	303.319	188.386	218.619	184.642	142.456	372.67	196.654	269.072	195.566	337.356	225.433	320.622	169.081	270.471	92.6309	335.859	134.428	224.824	133.646	248.979	248.391	182.1	167.283	207.457	157.288	418.688	204.415	303.329	142.276	418.486	140.592	227.473	152.271	255.624	133.922	291.783	207.674	225.339	129.795	269.416	119.207	282.522	212.448	314.214
1553529_at	8.35502	23.0359	3.62164	127.441	4.07253	5.6006	51.4068	7.41163	6.71046	9.27957	6.19184	27.3765	21.8702	10.8127	37.6805	5.0542	3.67326	21.5919	10.557	17.4255	12.8342	48.7205	2.45961	80.0627	29.642	71.0994	10.7391	5.28996	8.40264	6.76005	172.323	13.5801	13.8676	14.1321	9.00057	6.86018	14.2835	29.1372	4.45289	9.92419	37.5068	3.22954	3.44921	2.65083	4.76506	52.9994	10.119	16.8015	10.9512
1553530_a_at	4647.99	1851.19	4206.26	1312.23	4356.27	2726.45	3061.98	2529.41	2098.39	1649.59	4058.39	1463.74	2512.75	1953.52	3596.91	2220.9	3618.04	1444.18	3246.98	1380.55	3577.27	1442.48	2871.39	1528.58	2622.14	986.027	2351.44	1142.41	2618.6	2413.83	1419.62	1861.27	4660.69	1760.95	3225.2	3176.66	4299.05	2366.98	4390.71	1854.72	3567.23	2017.49	4177.84	1965.2	3684.1	1449.4	5292.11	2232.43	5703.92
1553531_at	52.2869	36.6409	2.58799	16.8473	8.34268	8.52211	13.9556	5.00128	3.28927	3.36342	11.2811	10.5385	5.45261	20.0351	20.5226	14.4236	4.61578	35.6388	16.3888	10.3287	7.10589	25.9859	22.3982	9.83236	36.2375	43.3466	19.4767	17.9706	2.79926	34.5555	240.904	6.78549	5.80029	16.2007	5.00158	6.35984	1.6701	45.2726	12.0881	4.17735	3.23299	7.78156	2.42542	5.80363	24.5693	23.7547	7.26141	5.43926	4.65651
1553532_a_at	126.978	50.0137	118.794	49.764	23.6951	36.1909	7.81244	129.74	25.523	24.7821	20.1956	13.9227	51.8421	20.3696	3.26493	115.194	52.3662	10.0446	4.51885	15.0379	27.6343	106.977	14.0925	13.294	7.65206	12.9155	17.2627	17.0693	83.0158	23.6474	85.8835	19.6159	58.4633	44.3417	15.0211	16.6013	14.2794	15.4163	59.5322	44.1972	15.7861	15.092	5.3744	8.81048	13.961	16.1438	15.749	15.6103	5.6029
1553533_at	30.3235	97.4936	71.028	126.186	67.056	84.8376	43.196	69.3691	81.5367	46.0604	55.8601	102.529	66.978	109.813	63.0269	73.2875	53.1626	86.408	47.5255	88.4355	43.7988	134.375	61.8957	102.589	80.4478	63.7775	90.5042	95.7181	54.4893	58.9922	323.492	92.4145	45.3282	109.8	29.3731	67.1422	39.4494	44.8751	36.1239	80.4117	80.3393	61.3627	12.9931	33.0136	45.2091	106.912	85.4037	133.859	53.6865
1553534_at	46.6764	60.6311	33.5778	116.195	19.198	1.2937	33.4416	41.0237	19.0853	18.3022	17.7321	95.6545	26.2543	35.3721	30.8138	34.4856	1.73706	84.9688	27.2675	71.0336	35.1984	73.464	77.966	57.5872	61.6289	57.18	36.8565	38.5127	5.0317	29.0007	259.63	31.431	39.8141	56.8457	30.7433	32.786	46.8344	39.7071	26.2799	8.12619	23.3289	44.3475	29.194	55.6726	8.99662	34.7829	34.0401	73.6981	44.8851
1553535_a_at	106.581	295.697	149.815	293.975	256.029	307.743	259.69	248.703	271.053	458.577	188.749	365.869	261.148	314.415	194.336	421.961	175.728	340.975	150.101	311.127	240.847	516.04	190.805	351.327	250.164	353.78	242.785	312.18	280.253	467.392	346.431	411.3	225.587	453.947	175.931	235.257	218.63	351.514	223.526	241.202	234.326	293.13	134.999	354.684	158.336	335.894	162.859	319.882	247.805
1553536_at	84.0675	13.5006	49.8417	38.9306	76.1587	3.33958	2.51547	100.936	87.2874	2.16047	62.8967	8.91268	37.5402	78.9427	74.0794	44.9973	74.763	65.9254	57.3993	65.9971	96.271	41.4718	105.058	101.131	42.1896	20.6403	96.5537	37.531	49.1622	89.4119	194.71	22.211	115.593	83.3804	120.075	113.203	80.2227	73.0867	11.9504	81.1047	44.8224	65.566	31.4646	54.6492	50.2647	3.16129	117.547	123.277	75.2823
1553537_at	9.36642	64.0589	24.6525	8.56595	45.2447	54.5016	3.38677	69.8305	4.8622	9.48439	4.43416	9.45298	9.81195	38.7967	2.72333	6.25047	6.87997	5.66157	7.42449	9.55599	7.70141	8.1723	3.04129	9.7272	13.0381	18.3357	32.9417	14.7356	2.58895	2.80306	299.92	6.66209	8.35061	7.53012	1.27777	6.61511	7.9737	5.78648	33.721	5.58762	3.44212	37.463	17.6167	9.22317	23.7773	10.2279	5.73051	5.00324	32.6649
1553538_s_at	75791.3	107911	82528.2	127141	100151	100611	91097.6	94004.1	43034.6	64286.2	57700.7	69003.2	54517	66141.4	69851.9	65513.2	53207.8	71435.7	57299.7	64007.8	70176.5	93345.7	59913.8	66540.3	55360.5	110838	81391.7	99834.7	53560.1	48840.2	118700	74930.1	56781.4	67848.6	40716.5	47529.6	49189.8	69885	60652.1	70501.6	54330.8	67272.7	66600.9	73058	77443.4	88700.6	48195.6	65783	94918.7
1553539_at	42.9606	72.3724	62.2681	20.6269	27.3958	119.072	19.0549	25.2086	14.9998	70.6628	73.4402	82.8032	3.78849	20.5302	62.6789	9.07451	72.0393	17.9222	49.8499	12.8838	62.9158	40.6175	10.9732	14.7171	102.482	32.2813	10.754	89.3812	6.5678	33.8403	353.128	23.344	38.4817	18.5597	23.365	33.8898	27.8274	10.2425	15.0999	20.3031	58.2422	87.1715	32.3462	25.0269	94.8788	28.0408	24.2826	7.73224	56.3433
1553540_a_at	82.3238	163.073	33.5292	47.8306	68.1309	119.923	12.7481	108.329	86.8376	84.9486	39.3263	150.157	19.5732	156.81	37.685	89.9291	11.9181	81.2631	30.1354	142.583	37.592	82.5029	16.7418	107.095	27.732	22.0748	105.924	87.4802	12.0276	38.6033	71.2876	102.541	67.1016	17.0006	10.1614	128.126	37.0858	73.5474	10.94	11.1227	9.92689	19.3598	26.7369	36.9565	9.04388	70.0055	63.1082	69.3211	69.4799
1553541_at	2.61644	29.3976	17.9462	24.6293	4.20842	4.68268	2.34546	4.23345	15.9186	40.9146	36.5461	4.85514	17.6423	5.56	25.5403	4.83214	4.4031	5.42586	21.6906	10.8018	3.87153	4.18651	12.7207	5.96877	3.33117	2.91758	30.0513	20.182	1.82432	7.11889	57.4117	54.8764	3.49583	8.96205	17.8577	36.5225	14.5998	2.16641	3.88318	3.8688	31.3773	2.79725	1.55107	4.30281	10.1394	8.20004	1.86211	3.17105	3.0393
1553542_at	92.7205	280.818	215.522	160.324	92.1498	96.8279	90.5398	55.4972	58.3867	136.848	93.4309	133.602	100.424	99.3769	31.1238	170.25	50.6642	114.494	80.9438	117.832	104.949	149.237	110.439	100.051	157.911	66.9691	102.334	155.734	132.651	90.1916	258.371	111.13	83.3669	123.609	137.001	88.6061	78.3077	99.5196	75.0848	80.2983	95.1245	94.6067	68.16	102.466	112.677	152.736	82.343	109.244	115.721
1553544_at	38.6887	138.154	50.9071	17.1274	53.385	152.071	18.4999	147.642	8.44376	67.7557	6.44719	57.0694	5.0673	107.051	57.0521	35.7299	8.13685	82.861	9.85209	50.0375	40.6945	32.3843	65.6086	21.0938	6.30268	16.8186	11.788	20.074	16.3074	18.4579	113.782	14.2203	11.7176	22.6947	73.8203	12.8463	90.6312	7.44037	42.2206	40.7248	25.681	17.0949	4.03785	82.8695	5.42839	49.2377	71.3834	7.55018	83.0049
1553545_at	3.45253	6.60522	3.0075	8.41011	5.58541	12.2987	5.14017	22.4501	62.7336	8.20356	3.78952	21.0477	14.1003	53.9353	5.2111	47.8877	30.4743	7.74139	20.1251	6.82252	3.21787	20.3574	40.4934	11.6846	6.75514	18.6435	5.54927	63.5735	4.15083	12.8249	160.684	9.83273	7.28156	23.4044	6.28943	17.1329	9.39843	9.66402	6.92461	6.54653	4.22303	6.02902	3.0601	15.1251	3.1761	5.14839	5.55162	11.9872	68.4984
1553546_at	1.59217	1.56739	9.56183	51.3603	2.10839	3.02958	2.55382	16.7151	29.7732	0.580316	16.9881	14.4213	2.16594	0.612416	2.11541	1.20708	35.2411	0.584773	0.854327	4.24753	2.89268	1.31243	1.91753	2.52851	14.2395	5.43782	0.669952	3.64367	2.09427	29.2228	15.5285	14.2399	3.5482	7.51528	0.767011	2.42828	12.3905	3.27377	2.95143	0.773497	2.97674	1.01793	4.3953	2.24606	2.50412	10.846	21.5924	0.519086	1.56238
1553547_at	76.5583	34.6854	36.8368	80.4186	31.5154	9.24704	21.7635	60.7368	9.06111	57.8217	7.51273	65.7828	51.9791	55.7599	43.8642	35.7794	33.5495	32.8953	21.9532	36.6957	43.9604	66.7012	72.6528	46.4216	22.3328	31.5983	56.0919	13.3994	47.3729	53.7503	157.935	55.7168	79.4907	85.3924	31.0588	33.9578	52.9947	67.5849	44.5575	26.1746	37.7439	45.2903	17.838	3.81704	48.8186	52.5787	43.6071	68.6611	44.2709
1553549_at	45.3391	2.3672	7.84365	16.2972	20.1434	9.63973	3.66075	65.9222	30.2298	9.53841	7.8146	23.1526	39.2844	4.36315	7.35939	3.33209	3.63579	3.14439	7.27972	9.47999	36.5577	2.84751	29.3742	7.23314	42.0099	47.3044	3.64976	17.2439	17.791	6.80829	144.307	44.1155	7.79035	30.1281	41.91	7.12614	11.7782	17.873	2.18063	9.78004	22.9625	48.1701	21.8046	1.70623	8.1442	51.471	3.36423	5.85867	6.65732
1553550_at	25.5732	9.34533	14.1443	12.743	9.15827	32.3189	6.71664	20.269	5.65011	19.3887	4.59269	35.8575	43.4811	5.01692	11.182	10.9688	11.3681	27.2017	19.6333	35.291	15.576	61.9695	13.6674	24.2844	9.42746	12.56	8.55763	36.0975	15.111	11.0882	152.812	6.7637	16.9143	44.1005	65.4002	26.4343	7.1005	21.8577	5.75055	3.64139	14.2437	40.8775	54.4896	5.80039	73.0674	19.2842	10.3837	14.3289	26.8253
1553551_s_at	47975.2	100374	60488.9	109848	64050.9	58160.9	74500.9	83471.2	44550.7	63548.4	45014.6	66403	44921.3	62084.5	52011.7	52577.2	36701.6	59314.3	36162.7	58944.1	55228.6	77284.1	55293.3	57254.7	45357.6	99037.1	70061.9	81701	42829.9	45816.1	111761	66536.5	43904.9	55429.2	31132.2	42910.4	32189.2	58414.9	33030.2	63489.6	51744.2	64291	40820.3	62834.8	51296.2	78820.6	22786.8	60754.7	57966.2
1553552_at	7.95795	75.7499	6.65446	63.1329	35.4322	52.1674	7.53007	30.028	56.554	45.6368	25.2306	36.4337	24.5633	58.1583	3.44145	51.8001	10.8711	5.7634	7.35137	29.1788	63.3897	46.0481	8.27304	18.4568	8.32196	67.6881	43.1972	13.1256	20.3084	33.3263	227.336	66.707	59.1865	57.7272	42.1374	44.6259	21.0763	9.94999	20.6563	60.5009	4.25003	55.6938	7.36317	21.6637	6.60723	56.5089	27.2158	11.7503	4.7188
1553553_at	57.3051	30.2367	4.69674	11.4304	89.3931	3.47711	63.8722	46.9643	33.3002	55.0688	23.6715	46.8648	65.129	41.0994	40.4688	17.1849	7.08059	3.30417	27.8709	52.2767	67.3436	63.0295	28.7943	82.3855	42.8079	43.597	49.41	71.3088	40.9636	61.7271	194.141	70.5101	21.9546	82.4179	65.5628	8.44815	3.80493	38.9609	13.2118	17.4758	40.7714	83.638	32.1152	19.3941	25.6176	41.7869	46.1291	8.7013	87.0918
1553555_at	13.4665	61.4501	11.6661	31.2474	54.7822	97.6939	14.4099	19.4726	48.162	69.7436	60.991	17.8098	46.759	86.4088	73.8546	13.6734	5.60235	22.8891	10.1448	13.4128	110.028	22.2681	105.695	111.835	13.8936	102.483	12.4267	18.0104	25.0394	11.4594	422.434	16.5746	15.9117	17.038	71.5228	18.0201	10.0713	55.2921	57.2222	95.7434	38.8885	12.5441	63.931	12.3981	12.7988	105.673	73.084	18.4327	16.5111
1553556_at	2.4543	6.15513	50.0089	22.7365	31.6143	10.7632	7.13089	12.6075	28.9015	25.7399	12.766	4.15309	39.6638	58.2093	1.17178	18.1342	42.3758	16.3877	12.4782	69.5015	22.7105	4.49681	60.8778	22.7626	47.6959	23.4528	7.32069	50.2429	28.9497	4.49107	50.8566	8.3567	13.4086	33.7364	30.5382	36.5367	19.8309	43.6063	17.2835	35.2026	14.0904	47.1099	25.737	29.4993	1.09563	56.1115	29.5485	15.7542	8.38946
1553558_at	76.5469	29.8202	2.18236	7.66723	13.4937	13.323	14.0287	12.2531	3.43954	2.99649	22.5603	38.1489	28.3683	24.8409	22.563	5.99188	6.35897	22.636	18.297	5.76998	10.1112	22.4109	6.01734	26.0921	4.27426	24.8294	17.129	15.5569	12.9011	66.2202	122.512	7.57761	19.7874	35.8291	3.94448	4.98029	30.2606	35.2749	20.7856	5.30187	2.0649	16.5365	4.81162	48.3752	45.8914	7.26047	6.9467	50.6452	21.6487
1553559_at	152.705	455.441	271.086	209.949	98.8862	137.968	132.47	326.049	625.429	479.086	252.237	244.649	165.585	469.551	176.118	165.263	211.565	191.932	171.184	275.274	155.633	275.048	371.956	181.201	200.797	203.833	117.922	148.374	171.711	180.48	174.105	218.514	561.639	232.311	198.065	254.524	194.25	261.195	180.701	165.145	376.103	188.662	424.727	79.8895	192.102	211.431	256.99	204.196	124.812
1553560_at	2.29311	69.236	40.6487	20.5951	14.6678	65.9981	3.75849	12.7992	4.96265	15.4402	44.1205	45.3325	11.4493	32.1574	39.5448	2.05188	44.4146	14.9924	12.321	14.9828	10.1309	5.5309	6.9954	51.4084	4.49751	9.04279	6.08139	5.0043	12.6972	35.73	114.324	71.1733	8.11724	11.8996	10.6729	14.1993	28.0411	44.3058	7.03435	11.8748	30.7041	10.4915	16.3969	21.2088	16.3467	14.7456	35.3965	12.5517	26.6358
1553561_at	39.947	8.94419	36.344	117.835	12.0828	43.1386	70.9453	28.8614	39.7612	63.1305	42.7317	43.6408	63.4496	68.8081	37.3332	35.658	58.7314	45.4309	40.7757	63.576	9.6253	9.6067	39.4201	47.7896	17.0584	36.1019	58.8718	81.1716	44.07	44.3898	278.858	40.9649	55.9187	71.1308	45.4164	42.555	23.3578	46.9323	21.0435	49.3005	26.9059	32.5047	49.6435	64.7287	45.2988	39.8945	52.6514	24.7024	49.0945
1553562_at	9.9511	55.6927	69.352	108.854	51.7202	41.7238	38.5069	12.8033	6.42556	42.8701	42.3467	63.8477	22.0493	75.2168	32.1067	53.9024	43.0542	59.6626	4.60312	54.444	45.3484	43.0706	43.0224	100.593	21.1775	47.3233	78.1875	74.2806	60.2011	42.2727	354.021	64.6676	77.9929	102.363	102.328	30.8015	58.4319	35.4464	25.1093	65.7322	31.1436	38.1771	7.78315	10.5644	28.3553	125.77	14.1742	47.0843	30.0037
1553564_at	53.335	64.2244	52.7976	120.123	99.8653	99.5449	76.4092	120.798	29.1467	105.917	55.9882	62.1165	74.3997	91.317	97.4776	207.28	6.46436	109.403	5.468	100.413	79.7424	104.018	24.8054	182.827	89.87	65.8389	113.464	75.6237	44.3748	85.1864	234.58	105.466	74.2284	155.877	94.5829	74.633	66.9918	95.9807	61.9368	87.669	61.5439	158.795	37.3552	71.2996	58.0324	193.179	115.859	77.2539	113.013
1553565_s_at	112.354	76.2829	98.6891	9.52554	9.88237	7.90025	30.2124	95.6423	7.47866	49.9386	49.7693	33.8978	13.8713	32.0826	11.3245	23.1351	34.3829	91.7742	9.35031	43.7888	139.378	115.9	46.9901	115.763	4.4135	17.9356	10.1034	6.16917	10.9436	74.4683	151.694	43.0777	86.627	130.625	69.4883	12.2174	36.5205	67.8806	4.24775	122.481	29.327	6.29046	5.02907	15.0509	29.1074	42.6794	10.4052	98.0267	53.3872
1553566_at	12.5788	54.005	43.9211	206.075	46.1249	25.7662	57.1184	92.0717	67.2109	102.304	82.1649	5.94399	30.6133	72.096	39.2183	15.8611	41.9143	32.6354	38.2367	102.368	11.9208	103.282	26.1229	118.774	38.1257	24.1937	19.2528	24.1758	40.0734	92.9954	88.4318	67.5659	47.661	152.966	49.4414	37.6842	31.234	30.7785	57.7522	13.5687	55.9986	41.2946	56.3864	63.253	50.6089	106.416	73.4012	90.4746	22.928
1553567_s_at	53891.5	84777.9	63838.6	94378.8	71432.1	66580.4	68894.4	75386.1	32361	39685.5	39495.3	40866.9	41324.2	43935.4	44074.7	43190.8	37718.6	45601.9	38503.8	39986.4	45297.7	62372.5	44676.6	54909.2	41746.6	67682.2	50896.9	58812.4	42205.1	37568.8	109687	53626.2	45143.3	49918.2	36920.9	40577.2	34303.3	41236.1	51134.2	55752.9	39738.3	43796.8	41613.7	39628.1	44233.5	54284.7	41970.5	44842.8	67716.1
1553568_a_at	65.9364	11.1103	43.6957	73.7944	71.8693	30.5025	31.2735	117.083	78.0905	9.70629	74.0478	45.661	6.03097	61.3449	44.333	48.5417	43.8275	25.0923	10.1984	38.9728	82.9248	96.7528	87.4291	58.9065	19.2569	16.7297	82.6261	52.9284	44.3138	80.1081	321.297	56.2356	52.8626	106.47	73.9269	69.9937	23.0766	11.6885	30.2548	62.6911	60.7776	89.2192	8.58015	15.5674	93.6675	105.725	62.4643	59.4308	46.8728
1553569_at	56092.5	114143	74706.1	125746	82036.5	80268.5	78457.6	100123	46210	69157.9	48257.4	74890.2	48625	71738	50925.7	60775.8	43650.6	69794.1	44463.5	66030.1	54248.2	86858.4	59726.2	69321.6	51073.2	114993	80367.6	98169.9	54886.8	48939.1	95601.2	70166.3	48912.5	66253.2	42006	52280.7	42197.4	67514.4	47660.3	70208.7	53135.1	70875.6	52110.7	67249.4	60559.5	85858.5	37924.7	71962.5	71742.7
1553570_x_at	59114.5	114198	76977.1	129198	81221.5	78923.2	79901.3	99061.5	45098	68011.3	47343.2	74294.1	48901.6	69153.1	50955.8	62058	43531.4	68845	44511.6	63467.1	52879.6	88792.9	58443.4	71526.6	52087.4	110267	77374	92398.2	54990.5	51039.5	142765	70997.1	48750.8	65334.9	42591.1	52536.6	40983.7	66541.1	48503.3	70646.8	51559.4	71173.9	51002.8	67613.3	61552.1	88048.3	38498.2	69147.2	76929.7
1553572_a_at	132.568	41.3481	29.0494	23.0629	122.624	126.894	27.671	8.85283	78.9775	18.1435	199.81	20.4197	12.3625	17.1854	63.9679	38.9821	145.965	19.5096	152.336	11.1105	278.592	63.4895	28.6996	111.646	69.2345	21.6259	26.3809	69.6747	8.37813	21.2246	214.063	16.9326	87.3897	32.5237	12.7508	50.5072	47.3294	47.2484	190.463	17.1375	55.8446	12.7487	109.059	9.89377	146.963	35.8755	72.6075	71.0116	26.99
1553573_s_at	4.80091	14.4562	4.62232	13.3359	41.0966	4.54715	20.4695	30.9887	2.63071	2.75964	2.95675	13.136	6.26068	7.35868	9.41059	13.9816	6.96009	5.52147	3.21566	5.75814	6.26777	3.22867	11.7129	9.52299	14.3163	6.39983	6.32231	8.55479	7.37217	31.9311	187.417	36.6472	10.6153	12.9801	4.07287	8.87531	9.65742	2.44893	5.0684	12.2302	39.8576	6.86189	49.4613	9.43696	16.7127	20.5271	3.93185	2.53144	10.6364
1553574_at	26.4221	74.1405	56.6993	51.5532	68.4718	99.7576	56.8246	40.8058	30.1834	11.7379	29.4571	31.1816	57.3372	35.6634	19.85	36.3042	15.4975	20.4685	15.4995	6.6421	23.098	12.2137	67.9366	1.72921	28.4878	38.9844	73.7686	36.577	49.7274	49.0631	155.346	52.8643	16.2359	49.0714	28.5343	45.7913	25.7957	44.9018	27.2708	27.2426	14.6371	58.7984	22.8309	27.2539	8.44159	64.9956	18.7008	4.04659	17.2786
1553575_at	3222.01	1386.06	2525.88	1644.38	3471.2	1814.2	2732.43	2632.37	1033.74	673.981	1705.62	532.018	1714.76	1124.58	1918.39	923.395	3132.44	989.972	2760.71	714.157	1501.15	734.904	927.612	608.553	2729.44	2615.64	2558.41	2707.17	2029.93	509.713	3185.76	1283.41	1831.87	867.122	1783.61	1179.82	3193.22	1873.41	1966.75	1895.13	1869.52	1665.52	2326.97	1783.61	1718.65	1758.16	2717.2	1180.72	2547.58
1553579_a_at	35.8938	2.96487	36.3262	22.6599	33.4528	1.00494	57.9527	19.6092	6.72342	29.3067	7.40348	0.753821	26.0207	28.7699	37.9907	9.91485	34.7467	25.567	9.09672	3.441	5.79449	23.8846	26.691	4.22219	23.2293	62.9629	33.9731	35.5894	2.84511	6.74028	78.6473	34.3165	5.56495	33.5821	14.1156	32.2529	2.14933	1.46496	11.2556	2.23106	50.1218	4.34273	17.8014	0.967276	3.02086	3.94091	12.8144	2.78627	2.57316
1553581_s_at	1002.48	1228.46	1295.22	967.95	1408.67	1159.92	981.419	965.698	1070.34	642.943	889.503	938.108	1036.6	792.716	1018.15	842.697	832.788	703.538	859.199	696.098	861.656	893.849	924.256	853.946	1127.02	569.449	826.228	839.249	818.698	747.264	353.667	966.31	1277.87	687.532	1198.88	1150.91	802.991	676.724	901.775	595.737	1470.44	787.484	1112.62	722.507	969.794	812.965	1003.93	550.068	1328.28
1553582_a_at	39.9957	85.9788	19.3324	76.1387	45.048	46.3909	101.704	49.3773	71.4652	42.4369	52.5662	25.3189	40.407	33.3996	40.6517	23.3703	27.5895	33.0508	56.2965	70.4485	42.9431	83.2664	23.8952	45.3218	7.09707	61.6153	5.34883	39.6294	44.2027	31.1925	81.013	84.8082	69.3225	50.8958	49.9512	51.0745	24.2677	41.1732	16.7162	50.4493	49.7658	61.6853	17.6413	70.8307	67.9213	65.1044	89.6343	54.8468	61.85
1553583_a_at	74.4093	88.4597	4.4287	184.895	86.8886	123.291	105.618	69.1121	54.3864	99.1048	38.758	69.5457	79.7357	48.7994	84.9099	70.5677	88.296	109.663	40.784	135.36	46.7031	177.693	67.3671	69.0034	83.8174	98.3732	106.855	164.017	39.0436	109.331	181.363	47.2669	81.4761	96.4753	60.9982	93.7735	29.8135	32.6329	12.1561	59.9946	34.0895	75.8845	20.4687	122.331	16.6844	119.028	73.1444	134.206	19.6114
1553584_at	16.9319	73.2943	53.2882	38.9266	11.2704	20.5728	120.586	18.7603	43.7187	21.8657	74.9625	43.5433	65.1413	22.6706	18.4119	7.67506	99.0853	5.43443	80.6491	30.0706	75.6937	32.913	53.3213	149.853	44.2846	15.4008	20.5308	12.8454	20.6675	15.6101	154.165	17.903	18.8673	62.2795	84.1735	11.4794	67.3907	65.2417	14.7068	14.6152	10.3307	44.1061	2.72229	9.68908	12.5618	67.3571	142.806	6.11632	76.062
1553585_a_at	5.84067	86.1838	34.0737	45.5521	51.2422	39.2748	39.1016	32.5306	53.7126	81.6825	28.4666	33.6904	35.1428	49.6817	5.85414	39.421	49.5996	25.1006	46.1233	39.6554	37.1822	54.0286	4.36527	28.9434	6.26576	18.4659	5.63677	29.197	26.5618	5.11302	14.4936	43.5639	29.9568	74.8254	11.1517	66.1111	30.7782	45.5076	34.6283	33.7825	24.6871	25.9986	34.7939	50.7231	37.9359	72.1487	19.2769	41.9601	30.9651
1553586_at	7.09258	78.8406	24.3494	64.5014	103.483	38.052	34.1993	48.5514	19.331	39.2051	28.4811	29.9067	8.26497	20.0161	29.5087	63.8611	29.8338	67.5965	31.0075	54.0864	44.9394	63.763	14.7371	88.1443	25.6467	21.2821	46.7068	98.2795	15.0111	41.1034	238.041	29.2095	77.1434	107.327	95.1257	61.3731	56.6007	26.4868	33.1448	40.4388	31.9128	71.0773	58.3062	69.2206	38.263	45.876	48.5754	114.471	87.9999
1553587_a_at	625.524	559.296	465.003	591.098	908.068	706.428	593.202	581.303	622.074	769.307	544.958	557.441	612.71	632.46	182.105	521.197	549.462	697.106	637.576	611.911	587.882	456.592	232.912	587.652	443.167	699.413	543.88	727.932	439.28	642.741	405.331	726.373	397.957	484.734	397.594	463.502	529.371	585.059	561.251	517.635	757.856	654.284	479.748	749.245	731.324	685.357	472.894	488.447	701.666
1553588_at	65848.1	133180	80832.3	157050	90106	90819.7	95594.1	121750	54499.9	73969.9	49410.8	77242.9	45987.8	91171.6	55560.9	69364.4	44477.8	66465.8	45449.6	69018.4	56418	90496.5	64168.6	77311.1	52404.4	114206	84562.9	96055.2	54972.4	53901.3	115008	86116.2	55995.3	63215.7	47808.9	63035.6	43390.2	65795.8	48282.1	80264.8	58353.2	82574.8	45944.7	59523	61104.9	87703	42971.4	86464.1	85981.7
1553589_a_at	6497.97	5158.74	3988.41	31356.7	6819.68	4386.13	17374.8	14806	1707.59	34533.8	8445.23	18365.3	6756.15	8258.53	10353.9	23719.3	10797.3	31176.4	9146.92	25754.1	9406.87	25737.4	6254.6	28105.4	8893.85	10094.7	9796.57	7648.39	8980.32	27058.2	782.088	12676	11013.5	32769.5	9205.53	12329.4	7024.55	23127	8130.59	30749.8	4877.31	36822.1	9087.96	36773	10018.4	31999.2	5350.36	25682.9	5540.31
1553590_at	11.8975	81.2414	13.4358	40.9412	8.03763	16.8069	49.0167	84.7238	11.5207	61.5002	18.6971	15.6145	18.0202	24.7624	74.2096	57.4127	15.7403	13.4286	11.4101	13.6796	35.6274	44.9017	51.9644	51.8141	62.6631	46.4484	64.3315	95.1939	11.9897	11.3445	180.541	13.4342	21.2229	41.553	13.2506	64.979	13.3712	87.4488	7.11883	20.1719	13.8118	96.4523	39.732	15.0521	3.91421	32.1134	21.036	27.9813	124.398
1553591_at	10.7601	27.0555	11.2005	54.1172	19.7624	6.98729	67.2268	17.3645	3.92837	113.201	36.7339	92.4209	11.5325	12.5983	52.8	51.3938	4.89702	29.3178	11.8186	6.60184	73.0673	22.2231	34.4287	24.7179	7.93118	8.89082	14.4736	17.4115	14.4404	2.7466	90.0953	7.30826	57.5298	41.0607	6.88623	36.4896	3.35589	61.7112	32.4108	15.8722	45.5238	16.6223	12.4709	9.22086	48.7851	28.2928	20.3447	29.7997	28.6301
1553592_x_at	17.044	59.6762	32.9831	123.616	54.4464	8.24445	52.8643	61.3827	95.6528	69.9864	7.63894	20.2778	17.6149	16.8798	10.5477	86.0038	84.2875	51.0799	57.8296	138.969	95.6218	154.446	83.1402	148.893	135.962	123.87	42.6585	38.2083	54.1519	89.1178	134.514	126.201	90.8966	104.079	71.1791	8.59108	42.2732	109.494	31.9428	31.0542	69.5229	52.0213	61.421	80.7522	89.4759	92.7692	12.6401	73.134	14.7047
1553593_a_at	238.663	86.1673	150.77	166.73	4.27096	75.701	143.659	143.274	5.30945	63.8755	206.432	76.5314	164.299	71.2583	142.158	16.8796	241.942	73.9647	104.715	66.1782	251.791	124.704	433.847	129.116	149.457	75.1507	61.4641	13.9478	169.904	78.6745	407.397	99.3852	332.655	55.9319	363.48	46.1188	165.662	64.7493	228.695	141.572	182.031	32.4444	128.25	29.3925	152.582	31.1141	196.583	100.076	252.837
1553594_a_at	137.205	434.067	116.675	485.449	117.106	188.734	292.921	313.917	241.8	312.695	181.227	441.165	138.719	414.58	230.718	301.19	129.812	344.228	162.071	321.969	156.964	442.213	253.59	423.167	178.47	459.851	321.024	334.675	168.451	373.582	513.545	421.232	220.887	469.026	170.981	138.949	185.98	331.7	18.0861	278.195	198.366	316.052	208.106	344.791	215.688	379.807	238.607	292.799	200.046
1553599_a_at	77.1982	113.357	77.6512	129.909	88.0442	38.3701	81.0548	99.0921	69.3927	121.019	60.6827	28.2789	54.1394	99.8279	97.8888	105.194	26.5156	106.433	78.01	107.544	50.7127	238.16	82.4417	159.721	86.2468	175.159	42.1341	155.037	89.1698	81.1702	409.28	82.5933	22.0109	168.375	2.73459	37.5722	76.6785	73.0999	48.593	93.6576	87.61	73.0562	83.3174	126.077	53.7851	67.5697	50.9898	141.339	17.1628
1553600_at	18.1791	27.5597	55.523	13.0102	13.2929	38.3248	115.175	12.1786	79.4168	32.7163	37.69	30.4554	35.5949	4.06285	4.65588	51.1306	60.3556	29.4212	37.3777	72.6675	15.5448	9.85619	34.1269	65.5603	40.3701	96.6399	101.504	17.1691	8.63317	12.4494	639.045	58.7733	28.1476	9.14292	20.3278	46.0459	8.82432	39.5076	30.7593	6.33374	5.4545	8.01779	19.0108	56.1715	29.5044	103.819	58.0763	23.6809	38.8974
1553601_a_at	36.5404	143.353	10.5439	8.20213	43.4886	79.076	84.8187	46.4749	277.316	58.9089	31.4325	53.7119	9.18553	30.985	26.9544	118.907	5.43265	3.20998	6.668	97.2761	9.2193	15.7849	4.06426	16.4658	37.7868	59.0843	50.8234	64.0162	21.0411	24.0998	132.348	15.2463	7.58125	13.5132	8.29675	58.2364	22.8675	82.0635	6.60855	58.7182	30.2356	26.1759	23.6838	52.9999	38.062	56.6054	8.29903	45.1614	28.1597
1553602_at	10.7015	112.32	101.842	69.7884	66.9373	8.35349	47.5281	82.4958	56.7156	74.1812	48.0994	51.4519	27.5034	134.867	54.613	31.1401	66.3037	44.9278	10.9052	55.8872	87.4552	16.6273	11.8943	36.6084	22.5339	62.6398	14.9156	96.9299	13.4865	26.9312	843.784	43.4933	70.5237	58.9127	72.8344	67.4903	50.3253	73.5475	32.2367	50.319	28.5547	22.7213	25.1996	76.9508	37.3336	38.842	80.0139	48.9156	3.208
1553603_s_at	183.046	186.04	120.471	132.288	132.211	229.654	150.892	173.895	308.342	174.41	118.124	199.588	84.8568	160.17	169.278	223.615	159.896	155.337	101.756	174.962	252.512	236.37	249.524	320.312	102.259	120.597	191.24	117.112	107.944	157.151	450.85	196.773	242.511	317.403	233.528	227.746	175.822	201.141	110.882	210.058	210.408	239.886	178.442	197.091	67.6844	119.443	132.256	194.77	185.34
1553604_at	0.602352	57.5204	12.1205	7.58937	41.3077	4.48509	52.8899	43.106	1.35427	16.9774	7.8534	53.715	13.08	61.9643	3.21441	10.8286	1.10598	14.7342	0.838421	13.0421	4.97164	5.23005	13.1248	13.8461	19.9196	25.3739	22.4539	60.7387	11.7898	26.6786	6.57768	5.89154	8.98146	29.5159	17.9894	45.4297	0.524793	37.5697	4.13114	2.66728	36.4128	0.606855	20.234	50.8304	21.4185	12.9962	11.7858	9.98635	2.90554
1553605_a_at	0.895315	3.9679	35.4819	1.78536	119.535	5.19479	130.403	73.2197	0.359679	31.7347	18.9611	61.0466	0.671798	124.961	10.438	1.45088	13.3152	17.3404	0.549442	38.9347	2.35157	42.0008	21.7252	1.5299	1.36227	32.6567	43.989	56.0958	16.015	0.549039	643.034	25.599	1.63612	17.4211	18.7706	86.8282	0.319428	63.2775	3.91981	39.1176	29.2698	27.2621	0.934377	11.9376	13.8643	23.0255	4.99678	40.5923	24.4321
1553607_at	2.44679	3.26497	1.22903	20.5811	0.702586	39.605	35.8071	49.6697	1.54178	18.9713	15.9337	1.67911	11.7033	33.5119	15.3987	1.81344	14.0048	14.1635	1.53973	14.3317	16.5978	19.3258	8.3079	34.8942	10.2794	25.5434	1.97764	37.2333	7.18507	9.39925	18.8706	2.68458	1.98326	17.2178	8.92837	2.6904	22.4529	1.54585	10.2093	3.69199	4.08838	25.4052	19.8822	17.4451	1.3983	22.1323	2.67256	8.83853	44.8286
1553608_a_at	29.3355	63.6427	27.8565	51.5838	1.33529	50.2779	39.4528	145.6	32.8959	19.5069	33.4552	38.6027	61.1306	41.4523	50.6054	35.3194	7.26739	40.2392	45.5196	32.6983	21.0896	1.53486	6.77407	21.4327	73.1281	6.09833	23.9537	44.7126	34.8043	41.0002	153.664	16.4917	49.4943	33.1728	4.48428	47.9154	13.8058	17.0988	19.3521	5.50225	5.76292	10.4615	16.3061	13.1825	1.10254	46.1431	39.6186	53.6099	75.9621
1553611_s_at	46.7037	59.1632	29.0014	121.786	178.021	36.9486	248.401	16.2302	102.252	35.4339	68.4912	15.2912	114.488	113.428	82.7859	71.8742	65.8783	45.8026	70.8163	64.9424	52.9695	69.1235	19.6842	111.575	106.58	244.724	159.794	18.5273	98.5643	13.7358	668.361	121.775	134.035	45.8489	123.894	34.6701	9.91951	93.0242	12.5191	17.8015	61.6976	19.1754	9.87162	95.5794	42.9172	5.68526	83.8287	20.2049	193.913
[truncated: 26,444 more rows]
[truncated: 38 more columns]
