# Supplementary material for: NFIB promotes the migration and progression of kidney renal clear cell carcinoma by regulating PINK1 transcription
Source: PeerJ. 2021 Apr 23;9:e10848. doi: 10.7717/peerj.10848 (PMC8074839; doi:10.7717/peerj.10848)
Supplement: Supplemental Information 4 [file peerj-09-10848-s004.xlsx]

## Sheet: 工作表1
patient barcode	patient.age_at_initial_pathologic_diagnosis	patient.gender	patient.laterality	patient.neoplasm_histologic_grade	patient.stage_event.pathologic_stage	patient.stage_event.tnm_categories.pathologic_categories.pathologic_m	patient.stage_event.tnm_categories.pathologic_categories.pathologic_n	patient.stage_event.tnm_categories.pathologic_categories.pathologic_t
TCGA-3Z-A93Z	69	male	right	g2	stage i	m0	n0	t1a
TCGA-6D-AA2E	68	female	right	g2	stage i	mx	nx	t1b
TCGA-A3-3317	67	male	left	g2	stage ii	m0	n0	t2
TCGA-A3-3358	57	female	left	g2	stage i	m0	n0	t1a
TCGA-A3-3387	49	male	left	g2	stage i	m0	n0	t1a
TCGA-A3-A6NI	47	male	left	g3	stage i	mx	nx	t1a
TCGA-A3-A6NJ	57	female	left	g1	stage i	mx	nx	t1a
TCGA-A3-A6NL	49	female	left	g2	stage i	mx	nx	t1b
TCGA-A3-A6NN	78	male	left	g2	stage i	mx	nx	t1a
TCGA-A3-A8CQ	59	female	left	g2	stage i	mx	nx	t1a
TCGA-A3-A8OU	74	female	right	g1	stage i	mx	nx	t1a
TCGA-A3-A8OV	75	male	right	g2	stage i	mx	nx	t1a
TCGA-A3-A8OW	37	male	left	g2	stage iii	mx	nx	t3a
TCGA-A3-A8OX	65	female	left	g3	stage i	mx	nx	t1a
TCGA-AK-3440	58	male	left	g3	stage i	m0	nx	t1a
TCGA-AK-3458	48	male	right	g3	stage i	m0	nx	t1b
TCGA-AK-3465	71	female	left	gx	stage i	m0	nx	t1b
TCGA-B0-4698	75	male	left	g4	stage iv	m0	nx	t4
TCGA-B0-4700	60	male	right	g4	stage iv	m1	nx	t4
TCGA-B0-4706	61	male	left	g4	stage iii	m0	nx	t3a
TCGA-B0-4710	75	female	right	g3	stage iii	m0	n0	t3a
TCGA-B0-4712	76	male	left	g3	stage iv	m1	nx	t3a
TCGA-B0-4810	47	male	left	g3	stage iii	m0	n1	t3a
TCGA-B0-4811	48	male	left	g3	stage iii	m0	n0	t3a
TCGA-B0-4815	65	male	left	g4	stage iii	m0	nx	t3a
TCGA-B0-4816	49	male	left	g3	stage ii	m0	n0	t2
TCGA-B0-4821	68	female	left	g3	stage iii	m0	n0	t3b
TCGA-B0-4834	49	male	right	g3	stage i	m0	n0	t1a
TCGA-B0-4836	61	male	right	g3	stage iv	m1	nx	t3b
TCGA-B0-4837	63	male	left	g3	stage i	m0	n0	t1b
TCGA-B0-4852	78	female	left	g2	stage ii	m0	n0	t2
TCGA-B0-5075	77	female	left	g2	stage iii	m0	n0	t3a
TCGA-B0-5080	63	male	right	g3	stage iv	m1	n0	t3a
TCGA-B0-5084	33	male	right	g3	stage iv	m1	n1	t3a
TCGA-B0-5085	76	female	left	g3	stage iii	m0	n0	t3a
TCGA-B0-5088	53	male	right	g3	stage i	m0	n0	t1b
TCGA-B0-5399	46	male	right	g2	stage i	m0	n0	t1b
TCGA-B0-5400	59	female	right	g4	stage iii	m0	n0	t3b
TCGA-B0-5402	64	male	left	g4	stage iv	m0	nx	t4
TCGA-B0-5690	53	female	right	g1	stage i	m0	nx	t1b
TCGA-B0-5691	66	female	left	g3	stage i	m0	n0	t1a
TCGA-B0-5692	66	female	right	g3	stage iii	m0	n0	t3b
TCGA-B0-5693	47	female	right	g2	stage i	m0	nx	t1b
TCGA-B0-5694	71	male	left	g3	stage iii	m0	n0	t3a
TCGA-B0-5695	61	female	left	g2	stage i	m0	n0	t1b
TCGA-B0-5696	69	male	right	g4	stage iii	m0	n0	t3a
TCGA-B0-5697	50	male	right	g2	stage i	m0	n0	t1a
TCGA-B0-5699	53	male	left	g2	stage i	m0	n0	t1
TCGA-B0-5700	77	male	left	g2	stage i	m0	n0	t1a
TCGA-B0-5701	65	male	left	g4	stage iii	m0	n0	t3b
TCGA-B0-5702	71	male	left	g2	stage i	m0	n0	t1b
TCGA-B0-5703	73	male	left	g3	stage i	m0	n0	t1b
TCGA-B0-5705	65	female	left	g2	stage i	m0	n0	t1
TCGA-B0-5706	45	male	left	g2	stage ii	m0	n0	t2
TCGA-B0-5707	39	female	right	g3	stage i	m0	n0	t1a
TCGA-B0-5709	62	female	right	g3	stage iii	m0	nx	t3a
TCGA-B0-5710	57	male	right	g2	stage i	m0	n0	t1b
TCGA-B0-5712	68	female	left	g3	stage iv	m1	n0	t2
TCGA-B0-5812	53	male	right	g3	stage i	m0	nx	t1b
TCGA-B2-3923	59	male	right	g2	stage ii	m0	nx	t2
TCGA-B2-3924	73	male	left	g2	stage i	m0	nx	t1b
TCGA-B2-5633	56	male	right	g2	stage i	m0	n0	t1b
TCGA-B2-5635	74	male	right	g2	stage i	m0	nx	t1a
TCGA-B2-5636	79	male	right	g2	stage i	m0	nx	t1a
TCGA-B2-5639	46	male	left	g3	stage iv	m1	nx	t3
TCGA-B2-5641	79	male	left	g3	stage i	m0	n0	t1a
TCGA-B4-5377	68	female	right	g3	stage iv	m1	n0	t3
TCGA-B4-5378	62	male	right	g2	stage i	m0	n0	t1
TCGA-B4-5832	65	male	left	g2	stage iii	m0	n0	t3b
TCGA-B4-5835	64	female	left	g2	stage i	m0	n0	t1
TCGA-B4-5838	52	male	left	g2	stage iv	m0	n1	t3
TCGA-B4-5843	45	male	right	g2	stage i	m0	n0	t1
TCGA-B4-5844	61	female	right	g1	stage ii	m0	n0	t2
TCGA-B8-4621	63	male	left	g3	stage i	m0	n0	t1b
TCGA-B8-5545	42	male	left	g2	stage i	m0	n0	t1a
TCGA-B8-5546	38	female	right	g2	stage i	m0	n0	t1b
TCGA-B8-5549	53	male	right	g3	stage i	m0	n0	t1b
TCGA-B8-5550	71	male	right	g3	stage iii	m0	n0	t3a
TCGA-B8-5551	65	female	right	g3	stage i	m0	n0	t1b
TCGA-B8-5553	67	female	left	g2	stage i	m0	n0	t1b
TCGA-B8-A54D	69	male	left	g2	stage iii	mx	nx	t3a
TCGA-B8-A54E	62	female	right	g3	stage i	mx	nx	t1b
TCGA-B8-A54F	49	female	left	g2	stage i	mx	nx	t1a
TCGA-B8-A54G	50	male	right	g3	stage i	mx	nx	t1a
TCGA-B8-A54H	69	female	left	g3	stage ii	mx	n0	t2a
TCGA-B8-A54I	48	male	left	g3	stage i	mx	nx	t1b
TCGA-B8-A54J	60	male	right	g2	stage ii	mx	nx	t2a
TCGA-B8-A54K	61	male	right	g1	stage i	mx	nx	t1a
TCGA-B8-A7U6	54	female	left	g3	stage i	NA	nx	t1a
TCGA-B8-A8YJ	60	female	right	g2	stage i	NA	nx	t1b
TCGA-BP-4173	47	male	right	g3	stage ii	m0	n0	t2
TCGA-BP-4331	52	male	left	g2	stage i	m0	n0	t1a
TCGA-BP-4759	50	male	left	g2	stage i	m0	nx	t1a
TCGA-BP-4761	57	male	right	g4	stage iii	m0	n1	t3a
TCGA-BP-4770	73	female	left	g4	stage iv	m0	n0	t4
TCGA-BP-4771	62	male	right	g4	stage iv	m1	n0	t3a
TCGA-BP-4787	59	female	left	g4	stage iv	m1	n0	t3a
TCGA-BP-4789	48	male	right	g2	stage i	m0	nx	t1a
TCGA-BP-4790	76	male	right	g2	stage i	m0	nx	t1a
TCGA-BP-4797	34	male	right	g3	stage iii	m0	n0	t3b
TCGA-BP-4804	59	male	right	g2	stage i	m0	nx	t1b
TCGA-BP-4807	42	male	right	g3	stage i	m0	nx	t1a
TCGA-BP-4959	49	male	right	g3	stage i	m0	nx	t1b
TCGA-BP-4960	46	male	left	g3	stage ii	m0	n0	t2
TCGA-BP-4961	47	male	right	g2	stage i	m0	nx	t1a
TCGA-BP-4965	46	male	left	g2	stage i	m0	nx	t1a
TCGA-BP-4967	76	male	right	g2	stage iii	m0	n0	t3a
TCGA-BP-4968	40	male	right	g3	stage i	m0	n0	t1b
TCGA-BP-4969	63	female	right	g2	stage i	m0	nx	t1a
TCGA-BP-4970	44	male	right	g3	stage iii	m0	n1	t1a
TCGA-BP-4971	40	male	right	g3	stage iii	m0	n0	t3a
TCGA-BP-4973	47	male	right	g3	stage iii	m0	nx	t3a
TCGA-BP-4974	58	male	right	g4	stage iv	m1	n0	t3a
TCGA-BP-4975	40	male	right	g3	stage i	m0	nx	t1b
TCGA-BP-4976	77	male	right	g3	stage i	m0	nx	t1a
TCGA-BP-4977	57	male	left	g3	stage i	m0	nx	t1b
TCGA-BP-4981	75	female	right	g3	stage iii	m0	nx	t3a
TCGA-BP-4982	42	male	left	g3	stage i	m0	nx	t1b
TCGA-BP-4985	72	male	left	g4	stage iii	m0	n0	t3a
TCGA-BP-4987	41	female	left	g2	stage i	m0	nx	t1b
TCGA-BP-4988	72	male	right	g2	stage i	m0	n0	t1a
TCGA-BP-4989	58	male	right	g3	stage iii	m0	n0	t3a
TCGA-BP-4992	66	male	left	g4	stage i	m0	nx	t1b
TCGA-BP-4994	54	male	left	g3	stage i	m0	nx	t1a
TCGA-BP-4995	68	male	right	g3	stage i	m0	n0	t1b
TCGA-BP-4998	49	male	right	g3	stage i	m0	nx	t1a
TCGA-BP-5001	43	female	right	g2	stage i	m0	nx	t1b
TCGA-BP-5007	45	male	left	g2	stage ii	m0	n0	t2
TCGA-BP-5008	46	male	right	g2	stage i	m0	nx	t1a
TCGA-BP-5009	52	male	left	g3	stage i	m0	nx	t1b
TCGA-CJ-4635	48	male	left	g3	stage i	m0	nx	t1b
TCGA-CJ-4870	58	female	left	g2	stage iii	m0	nx	t3a
TCGA-CJ-4875	67	male	right	g3	stage iv	m1	nx	t3a
TCGA-CJ-4876	57	male	left	g3	stage ii	m0	n0	t2b
TCGA-CJ-4878	71	female	left	g2	stage iii	m0	nx	t3a
TCGA-CJ-4881	41	male	right	g3	stage iii	m0	nx	t3a
TCGA-CJ-4887	48	male	right	g3	stage iv	m1	nx	t3a
TCGA-CJ-4888	59	male	left	g4	stage iv	m1	nx	t3a
TCGA-CJ-4889	63	female	left	g4	stage i	m0	nx	t1a
TCGA-CJ-4890	72	male	left	g4	stage iv	m1	n0	t3a
TCGA-CJ-4891	57	female	left	g4	stage iii	m0	n0	t3c
TCGA-CJ-4895	62	male	left	g4	stage iv	m1	nx	t3a
TCGA-CJ-4899	42	male	left	g2	stage i	m0	nx	t1b
TCGA-CJ-4900	69	female	left	g4	stage iv	m1	n1	t4
TCGA-CJ-5671	51	male	left	g3	stage i	m0	nx	t1a
TCGA-CJ-5672	84	male	left	g3	stage i	m0	nx	t1a
TCGA-CJ-5675	70	male	right	g3	stage ii	m0	nx	t2a
TCGA-CJ-5676	47	male	right	g3	stage iii	m0	nx	t3b
TCGA-CJ-5677	54	female	right	g4	stage iv	m1	nx	t3a
TCGA-CJ-5678	62	male	left	g3	stage iv	m1	n0	t2b
TCGA-CJ-5679	73	male	left	g4	stage iii	m0	nx	t3b
TCGA-CJ-5680	65	female	right	g4	stage iv	m1	nx	t3a
TCGA-CJ-5681	44	female	left	g3	stage iv	m1	nx	t3a
TCGA-CJ-5682	60	male	left	g4	stage iv	m1	nx	t3a
TCGA-CJ-5683	78	male	right	g3	stage i	m0	nx	t1b
TCGA-CJ-5686	59	female	left	g3	stage i	m0	nx	t1b
TCGA-CJ-5689	90	male	left	g4	stage i	m0	nx	t1b
TCGA-CJ-6027	77	male	right	g4	stage i	m0	nx	t1a
TCGA-CJ-6028	58	male	left	g4	stage iv	m1	nx	t3a
TCGA-CJ-6030	65	male	left	g3	stage i	m0	n0	t1a
TCGA-CJ-6031	54	male	right	g3	stage i	m0	nx	t1b
TCGA-CJ-6032	63	female	right	g3	stage ii	m0	nx	t2
TCGA-CJ-6033	54	female	right	g4	stage iv	m1	n0	t3a
TCGA-CW-5580	73	female	right	g3	stage iv	m1	nx	t3a
TCGA-CW-5581	44	male	right	g3	stage i	m0	nx	t1b
TCGA-CW-5583	51	female	right	g2	stage i	m0	nx	t1a
TCGA-CW-5584	74	male	right	g3	stage iii	m0	n1	t3b
TCGA-CW-5585	51	male	right	g2	stage iv	m1	n0	t3b
TCGA-CW-5587	62	female	left	g2	stage iii	m0	n0	t3b
TCGA-CW-5588	78	female	right	g2	stage i	m0	nx	t1a
TCGA-CW-5589	52	male	left	g2	stage i	m0	nx	t1a
TCGA-CW-5590	51	male	right	g3	stage iv	m1	nx	t3a
TCGA-CW-5591	56	male	right	g2	stage iv	m1	n0	t3a
TCGA-CW-6087	61	male	right	g4	stage iv	m1	n1	t3a
TCGA-CW-6088	60	male	right	g2	stage i	m0	n0	t1b
TCGA-CW-6097	32	male	left	g4	stage iii	m0	nx	t3a
TCGA-CZ-4854	68	male	right	g2	stage i	m0	n0	t1b
TCGA-CZ-4857	56	male	right	g3	stage iv	m1	n0	t3a
TCGA-CZ-4858	39	male	left	g4	stage ii	m0	nx	t2
TCGA-CZ-4860	60	male	right	g4	stage iv	m1	nx	t4
TCGA-CZ-4863	51	female	left	g3	stage iii	m0	n0	t3b
TCGA-CZ-4865	70	female	left	g2	stage i	m0	nx	t1a
TCGA-CZ-4866	79	female	right	g3	stage i	m0	nx	t1
TCGA-CZ-5451	74	male	left	g3	stage ii	m0	n0	t2
TCGA-CZ-5452	69	male	right	g2	stage ii	m0	n0	t2
TCGA-CZ-5453	67	male	left	g2	stage ii	m0	nx	t2
TCGA-CZ-5454	63	male	right	g2	stage iv	m1	n0	t2
TCGA-CZ-5455	63	male	right	g4	stage iv	m1	nx	t3b
TCGA-CZ-5456	57	male	left	g3	stage ii	m0	n0	t2
TCGA-CZ-5457	62	male	right	g4	stage iii	m0	nx	t3a
TCGA-CZ-5458	43	male	right	g3	stage iii	m0	nx	t3a
TCGA-CZ-5459	63	male	right	g3	stage iii	m0	nx	t3b
TCGA-CZ-5460	55	male	right	g2	stage iv	m1	nx	t3b
TCGA-CZ-5461	52	male	right	g4	stage iv	m1	nx	t1b
TCGA-CZ-5462	83	male	right	g3	stage iv	m1	nx	t1b
TCGA-CZ-5463	76	male	left	g2	stage ii	m0	nx	t2
TCGA-CZ-5464	69	male	left	g2	stage iv	m1	nx	t3b
TCGA-CZ-5465	76	female	left	g2	stage iii	m0	nx	t3b
TCGA-CZ-5466	67	male	right	g2	stage iii	m0	nx	t3a
TCGA-CZ-5467	86	female	right	g4	stage iii	m0	n0	t3a
TCGA-CZ-5468	84	male	left	g4	stage iv	m1	nx	t3b
TCGA-CZ-5469	41	male	left	g2	stage ii	m0	n0	t2
TCGA-CZ-5470	72	female	left	g3	stage ii	m0	n0	t2
TCGA-CZ-5982	59	female	left	g2	stage i	m0	nx	t1a
TCGA-CZ-5984	51	male	left	g3	stage i	m0	n0	t1b
TCGA-CZ-5985	58	male	right	g2	stage ii	m0	n0	t2
TCGA-CZ-5986	61	male	left	g3	stage i	m0	n0	t1
TCGA-CZ-5987	60	male	right	g2	stage iv	m1	nx	t3b
TCGA-CZ-5988	38	male	right	g2	stage i	m0	n0	t1b
TCGA-CZ-5989	60	male	right	g2	stage ii	m0	n0	t2
TCGA-DV-5565	59	male	right	g2	stage i	m0	nx	t1a
TCGA-DV-5566	67	female	right	g2	stage i	m0	nx	t1a
TCGA-DV-5567	40	female	right	g2	stage i	m0	nx	t1a
TCGA-DV-5568	26	male	right	g2	stage i	m0	nx	t1a
TCGA-DV-5569	29	female	right	g2	stage i	m0	nx	t1a
TCGA-DV-5573	41	male	right	g2	stage i	m0	nx	t1a
TCGA-DV-5574	37	male	right	g2	stage i	m0	nx	t1a
TCGA-DV-5575	52	female	left	g2	stage i	m0	nx	t1a
TCGA-DV-5576	55	female	left	g2	stage i	m0	nx	t1a
TCGA-DV-A4VX	59	male	right	g4	stage iv	mx	n0	t3b
TCGA-DV-A4VZ	53	male	right	g2	stage i	mx	nx	t1a
TCGA-DV-A4W0	55	male	left	g3	stage i	mx	nx	t1b
TCGA-EU-5905	67	female	right	g3	stage i	m0	nx	t1
TCGA-EU-5906	55	male	left	g2	stage i	m0	nx	t1b
TCGA-EU-5907	81	male	right	g3	stage iii	m0	nx	t3a
TCGA-G6-A5PC	54	female	left	g4	stage iv	m1	n0	t1b
TCGA-G6-A8L6	55	male	left	g3	stage iv	mx	nx	t2a
TCGA-G6-A8L7	81	female	right	g3	stage i	mx	n0	t1b
TCGA-G6-A8L8	62	female	right	g3	stage i	mx	nx	t1b
TCGA-GK-A6C7	76	female	right	NA	stage i	mx	nx	t1a
TCGA-MM-A563	41	male	left	g2	NA	mx	nx	t3
TCGA-MM-A564	68	male	right	g2	stage ii	mx	nx	t2a
TCGA-MM-A84U	58	female	bilateral	g2	stage i	mx	nx	t1a
TCGA-MW-A4EC	72	female	right	g2	stage i	mx	nx	t1a
TCGA-T7-A92I	47	female	right	g1	stage i	mx	nx	t1a
TCGA-T7-A93I	55	female	right	g2	stage iv	m0	n0	t2
TCGA-T7-A94I	50	male	left	g2	stage i	m1	n0	t2
TCGA-T7-A95I	62	male	right	g3	stage i	m0	n0	t2
TCGA-T7-A96I	52	male	right	g1	stage i	m0	n0	t2
TCGA-T7-A97I	50	male	left	g2	stage i	m0	n0	t2
TCGA-T7-A98I	52	male	left	g2	stage iv	m0	n0	t1
TCGA-T7-A99I	70	male	left	g2	stage iv	m0	n0	t3
TCGA-T7-A100I	59	male	left	g1	stage iv	m0	n1	t2
TCGA-T7-A101I	56	female	left	g2	stage iv	m0	n0	t1
TCGA-T7-A102I	54	male	left	g2	stage i	mx	n0	t2
TCGA-T7-A103I	61	male	right	g3	stage i	mx	n0	t3
TCGA-T7-A104I	39	female	left	g3	stage i	m0	n0	t1
TCGA-T7-A105I	52	male	right	g3	stage iv	m0	n1	t1
TCGA-T7-A106I	39	male	left	g4	stage iv	m0	n0	t2
TCGA-T7-A107I	54	male	left	g4	stage iv	mx	n1	t2
TCGA-T7-A108I	77	male	left	g4	NA	mx	n0	t3
TCGA-T7-A109I	50	male	right	g3	stage i	mx	n0	t2
TCGA-T7-A110I	67	male	right	g3	stage i	m0	n1	t3
TCGA-T7-A111I	45	female	right	g3	stage i	m0	n1	t2
TCGA-T7-A112I	66	male	right	g3	stage i	m0	n0	t2
TCGA-T7-A113I	36	male	right	g4	stage ii	mx	n0	t2
TCGA-T7-A114I	48	male	right	g3	stage i	m0	n1	t2
TCGA-T7-A115I	36	male	left	g3	stage i	m0	n2	t2
TCGA-T7-A116I	62	female	left	g3	stage i	m0	n0	t2
TCGA-T7-A117I	47	male	right	g3	stage i	m0	n0	t2
TCGA-T7-A118I	50	male	left	g3	stage iv	m0	n0	t2
TCGA-T7-A119I	34	female	left	g2	stage i	mx	nx	t3
TCGA-T7-A120I	60	male	right	g2	stage i	m0	n0	t2
TCGA-T7-A121I	37	male	left	g3	NA	m0	n0	t2
TCGA-T7-A122I	40	male	left	g3	stage i	m0	n0	t1
TCGA-T7-A123I	85	female	right	g3	stage i	mx	n1	t2
TCGA-T7-A124I	60	male	left	g3	stage ii	mx	n0	t2
TCGA-T7-A125I	54	female	left	g2	NA	mx	nx	t2
TCGA-T7-A126I	73	male	left	g4	stage i	mx	n0	t2
TCGA-T7-A127I	71	male	right	g4	stage i	mx	n0	t3
TCGA-T7-A128I	73	female	right	g1	stage i	m0	n3	t1
TCGA-T7-A129I	41	male	right	g3	stage i	m0	n2	t3
TCGA-T7-A130I	67	male	left	g3	stage i	mx	n0	t1
TCGA-T7-A131I	52	male	right	g2	stage ii	m0	n0	t2
TCGA-T7-A132I	63	male	left	g3	stage ii	m0	n1	t1
TCGA-T7-A133I	46	female	right	g2	stage iv	m0	nx	t1b
TCGA-T7-A134I	60	male	right	g4	stage ii	m0	nx	t3
TCGA-T7-A135I	76	male	left	g2	stage iv	m0	n0	t2
TCGA-T7-A136I	45	female	left	g2	stage i	m0	n0	t2
TCGA-T7-A137I	42	female	left	g2	stage iv	m0	n0	t2
TCGA-T7-A138I	37	male	left	g4	stage ii	m0	n1	t2
TCGA-T7-A103I	73	male	left	g2	stage i	m0	n1	t2
TCGA-T7-A104I	70	female	right	g3	stage i	m0	n1	t3
TCGA-T7-A105I	54	male	right	g2	stage ii	m0	n0	t2
TCGA-T7-A106I	56	male	left	g2	stage iii	m0	n0	t3
TCGA-T7-A107I	64	male	left	g3	stage i	m0	n1	t2
TCGA-T7-A108I	63	male	left	g3	stage ii	m0	n2	t2
TCGA-T7-A109I	52	male	right	g2	stage ii	m0	n1	t2
TCGA-T7-A110I	58	female	left	g3	stage iii	m0	n1	t3
TCGA-T7-A111I	79	female	right	g3	stage i	mx	n3	t2
TCGA-T7-A112I	80	female	left	g2	stage iii	m0	n3	t2a
TCGA-T7-A113I	53	male	right	g2	stage iii	m0	n1	t2
TCGA-T7-A114I	46	female	left	g2	stage ii	m0	n1	t3
TCGA-T7-A115I	62	male	right	g2	stage ii	m0	n0	tx
TCGA-T7-A116I	62	male	left	g2	stage ii	m0	n0	t2
TCGA-T7-A117I	66	female	right	g3	stage ii	m0	n0	t2
TCGA-T7-A118I	63	female	right	g3	stage x	m0	n0	t2
TCGA-T7-A119I	82	male	left	g3	stage ii	m0	n0	t2
TCGA-T7-A120I	48	male	right	g2	stage iii	mx	n0	t2
TCGA-T7-A121I	62	male	left	g2	stage iii	m0	n2	t2
TCGA-T7-A122I	59	male	left	g2	stage iii	m0	n1	t2
TCGA-T7-A123I	55	male	right	g2	stage ii	m0	n0	t2
TCGA-T7-A124I	66	male	left	g2	stage i	mx	n0	t2
TCGA-T7-A125I	37	male	left	g1	stage ii	mx	n0	t3
TCGA-T7-A126I	62	female	left	g3	stage ii	mx	n0	t2
TCGA-T7-A127I	39	female	left	g2	stage ii	m0	n0	t2
TCGA-T7-A128I	50	male	right	g2	stage i	mx	n0	t2
TCGA-T7-A129I	51	female	right	g3	stage iii	mx	n0	t2
TCGA-T7-A130I	59	male	right	g3	stage i	mx	n0	t2
TCGA-T7-A131I	63	male	left	g3	stage iii	mx	n0	t1
TCGA-T7-A132I	48	female	left	g2	stage iii	mx	n0	t1
TCGA-T7-A133I	67	female	right	g2	stage ii	mx	n0	t2
TCGA-T7-A134I	63	male	left	g3	stage i	mx	n0	t2
TCGA-T7-A135I	53	male	left	g2	stage iii	m0	n0	t2
TCGA-T7-A136I	62	male	right	g3	stage ii	m0	n1	t2
TCGA-T9-A005I	39	female	right	g3	stage iii	m0	n0	t3
TCGA-T9-A006I	61	male	left	g3	stage ii	m0	n0	t3
TCGA-T9-A007I	48	male	left	g2	stage ii	mx	n2	t2
TCGA-T9-A008I	67	female	left	g1	stage ii	m0	n0	t3
TCGA-T9-A009I	56	male	right	g3	stage ia	m0	n0	t3
TCGA-T9-A010I	74	female	right	g2	stage iii	m0	n0	t2
TCGA-T9-A011I	62	female	right	g3	stage ii	m0	n0	t2
TCGA-T9-A012I	61	female	right	g2	stage i	m0	n3	t2
TCGA-T9-A013I	63	male	right	g2	stage ii	m0	n0	t2
TCGA-T9-A014I	49	male	left	g4	stage ii	m0	n0	t2
TCGA-T9-A015I	85	female	left	g4	stage ii	m0	n0	t2
TCGA-T9-A016I	50	female	right	g4	stage ii	m0	n1	t2
TCGA-T9-A017I	70	female	right	g4	stage iii	m0	n0	t2
TCGA-T9-A018I	39	female	right	g2	stage ii	mx	nx	t2
TCGA-T9-A019I	50	male	left	g2	stage ii	m0	n0	t2
TCGA-T9-A020I	90	male	right	g3	stage ii	mx	n0	t2
TCGA-T9-A021I	34	male	right	g2	stage ii	m0	n0	t1
TCGA-T9-A022I	66	male	right	g3	stage i	m0	n0	t2
TCGA-T9-A023I	55	male	right	g3	stage iii	m0	n0	t1
TCGA-T9-A024I	47	male	left	g3	stage ii	m0	n0	t1
TCGA-T9-A025I	62	male	right	g2	stage ii	m0	n0	t2
TCGA-T9-A026I	45	female	left	g2	stage iii	m0	n0	t2
TCGA-T9-A027I	35	male	right	g2	stage ii	m0	n0	t2
TCGA-T9-A028I	46	male	left	g3	stage ii	m0	n3	t1b
TCGA-T9-A029I	42	female	left	g2	stage i	m0	n0	t3
TCGA-T9-A030I	49	male	right	g3	stage iv	m0	n0	t2
TCGA-T9-A031I	49	male	left	g3	stage ii	m0	n0	t2
TCGA-T9-A032I	46	male	left	g3	stage ii	m0	n0	t2
TCGA-T9-A033I	57	male	right	g4	stage ii	m0	n1	t2
TCGA-T9-A034I	49	male	left	g3	stage ii	m0	nx	t3
TCGA-T9-A035I	67	male	right	g3	stage i	m1	n1	t2
TCGA-T9-A036I	46	female	right	g3	stage ii	m0	n1	t3
TCGA-T9-A037I	77	male	left	g3	stage i	m0	n0	t3
TCGA-T9-A038I	66	male	left	g3	stage ii	m0	n0	t2
TCGA-T9-A039I	62	male	right	g4	stage iv	m0	n3	t2
TCGA-T9-A040I	59	male	right	g3	stage iv	m0	n0	t3
TCGA-T9-A041I	57	female	left	g3	stage iv	m0	n0	t2
TCGA-T9-A042I	78	male	right	g2	stage ii	m0	n0	t2
TCGA-T9-A043I	79	male	right	g4	stage ii	m0	n0	t3
TCGA-T9-A044I	57	female	left	g3	stage i	m0	n0	t2
TCGA-T9-A045I	37	male	right	g2	stage iii	m0	n0	t1b
TCGA-T9-A046I	62	male	left	g2	stage ii	m0	n0	t2
TCGA-T9-A047I	56	male	left	g2	stage ii	m0	n1	t2
TCGA-T9-A048I	63	female	right	g2	stage iii	m0	n1	t3
TCGA-T9-A049I	46	male	left	g4	stage i	m0	n1	t2
TCGA-T9-A050I	62	female	left	g4	stage ii	m0	nx	t3
TCGA-T9-A051I	44	male	left	g2	stage ii	m0	n0	t2
TCGA-T9-A052I	61	male	right	g3	stage ii	m0	n1	t3
TCGA-T9-A053I	50	female	left	g2	stage ii	m0	n1	t3
TCGA-T9-A054I	49	male	right	g3	stage iii	m0	n0	t3
TCGA-T9-A055I	71	male	left	g2	stage iii	m0	n0	t2
TCGA-T9-A056I	62	male	left	g3	stage iii	m0	n3	t2
TCGA-T9-A057I	62	male	left	g2	stage ii	m0	n0	t2
TCGA-T9-A058I	79	female	right	g2	stage ii	m0	n0	t2
TCGA-T9-A059I	70	male	right	g2	stage ii	m0	n1	t2
TCGA-T9-A060I	40	male	left	g2	stage ii	m0	n1	t2
TCGA-T9-A061I	56	female	left	g2	stage ii	m0	n0	t2
TCGA-T9-A062I	62	female	right	g2	stage ii	m0	n0	t2
TCGA-T9-A063I	52	male	right	g2	stage ii	m1	n0	t2
TCGA-T9-A064I	54	male	right	g2	stage ii	m1	n0	t2
TCGA-T9-A065I	54	female	right	g2	stage iii	m0	n0	t3
TCGA-T9-A066I	84	male	right	g2	stage ii	m0	n2	t1
TCGA-T9-A067I	62	male	left	g2	stage ii	m0	n1	t2
TCGA-T9-A068I	47	male	right	g2	stage ii	m0	n1	t2
TCGA-T9-A069I	51	male	right	g4	stage ii	m1	n0	t2
TCGA-T9-A070I	48	male	right	g2	stage ii	m0	n0	t2
TCGA-T9-A071I	68	female	right	g3	stage ii	m0	n0	t2
TCGA-T9-A072I	48	female	right	g3	stage ii	m0	n0	t2
TCGA-T9-A073I	66	female	right	g2	stage ii	m0	n0	t2
TCGA-T9-A074I	60	male	right	g3	stage iii	m0	n2	t2
TCGA-T9-A075I	63	female	right	g4	stage i	m0	n0	t2
TCGA-T9-A076I	63	female	right	g3	stage iii	m0	n0	t3
TCGA-T9-A077I	69	male	left	g3	stage ii	m0	n0	t2
TCGA-T9-A078I	77	male	left	g3	stage ii	m0	n2	t2
TCGA-T9-A079I	66	male	left	NA	stage ii	m0	n0	t3
TCGA-T9-A080I	84	male	right	g2	stage ii	m0	n0	t2
TCGA-T9-A081I	42	female	left	g2	stage ii	m0	n0	t2
TCGA-T9-A082I	66	male	right	g2	stage ii	m0	n0	t2
TCGA-T9-A083I	69	male	right	g2	stage iv	m0	n1	t2
TCGA-T9-A084I	69	female	right	g1	stage iii	m0	n0	t2
TCGA-T9-A085I	57	male	left	g2	stage iv	m0	n2	t2
TCGA-T9-A086I	65	male	right	g2	stage iii	m0	n0	t2
TCGA-T9-A087I	65	male	left	g3	stage ii	m0	n0	t2
TCGA-T9-A088I	69	female	right	g1	stage i	m0	n2	t2
TCGA-T9-A089I	35	male	left	g2	stage iii	m0	n0	t2
TCGA-T9-A090I	58	female	right	g2	NA	m0	n0	t3
TCGA-T9-A091I	51	male	left	g2	stage i	m0	n2	t2
TCGA-T9-A092I	68	male	left	g1	stage iii	m0	n2	t2
TCGA-T9-A093I	80	female	right	g2	stage ii	m0	n2	t2
TCGA-T9-A094I	73	male	right	g3	stage i	m0	n2	t2
TCGA-T9-A095I	66	female	right	g2	stage ii	m0	n2	t2
TCGA-T9-A096I	76	male	left	g3	stage ii	m0	n2	t2
TCGA-T9-A097I	85	male	left	g3	NA	m0	n0	t3
TCGA-T9-A098I	80	female	left	g3	NA	m0	n2	t2
TCGA-T9-A099I	58	male	left	g4	stage iii	m0	n2	t3
TCGA-T9-A100I	67	male	left	g3	NA	m0	n2	t3
TCGA-T9-A101I	44	male	left	g3	stage ii	m0	n1	t2
TCGA-T9-A102I	59	male	right	g3	stage ii	m0	n1	t2
TCGA-T9-A103I	89	female	right	g3	stage ii	m0	n3	t2
TCGA-T9-A104I	52	male	right	g3	stage ii	m0	n3	t2
TCGA-T9-A105I	65	male	right	g4	stage ii	m0	n1	t2
TCGA-T9-A106I	41	female	left	g2	stage ii	m0	n1	t2
TCGA-T9-A107I	66	female	left	g2	stage ii	m0	n1	t2
TCGA-T9-A108I	53	male	left	g3	stage iii	m0	n0	t2
TCGA-T9-A109I	52	male	left	g4	stage iii	m0	n0	t2
TCGA-T9-A110I	89	female	right	g3	stage ii	m0	n1	t3
TCGA-T9-A111I	45	male	right	g3	stage ii	m0	n1	t2
TCGA-T9-A112I	70	male	left	g3	stage i	m0	n1	t3
TCGA-T9-A113I	52	male	right	g2	stage iii	m0	n2	t2
TCGA-T9-A114I	64	male	left	g2	stage ii	m0	n0	t3
TCGA-T9-A115I	43	male	left	g2	stage iii	m0	n0	t2
TCGA-T9-A116I	76	female	right	g3	stage ii	m0	n1	t2
TCGA-T9-A117I	74	male	left	g3	stage ii	m0	n1	t2
TCGA-T9-A118I	48	male	left	g2	stage ii	m0	n0	t2
TCGA-T9-A119I	75	female	left	g3	stage ii	m0	n2	t2
TCGA-T9-A120I	45	male	right	g3	stage ii	m0	n1	t2
TCGA-T9-A121I	73	female	left	g2	stage i	m0	n1	t2
TCGA-T9-A122I	65	female	left	g3	stage ii	m0	n2	t3
TCGA-T9-A123I	76	female	right	g3	stage ii	m0	n1	t2
TCGA-T9-A124I	40	male	right	g4	stage ii	m0	n0	t2
TCGA-T9-A125I	58	male	left	g4	stage ii	m0	n1	t2
TCGA-T9-A126I	47	female	right	g4	stage i	m0	n0	t2
TCGA-T9-A127I	79	female	right	g4	stage i	mx	n0	t2
TCGA-T9-A128I	75	female	right	g4	stage ii	m0	n0	t2
TCGA-T9-A129I	57	female	right	g2	stage ii	mx	n1	t2
TCGA-T9-A130I	83	male	right	g4	stage iii	m0	n0	t2
TCGA-T9-A131I	82	male	left	g3	stage i	m0	n1	t2
TCGA-T9-A132I	68	male	left	g3	stage iii	m0	n0	t3
TCGA-T9-A133I	51	male	right	g3	stage ii	m0	n0	t2
TCGA-T9-A134I	70	male	right	g3	stage iii	m0	n1	t2
TCGA-T9-A135I	62	male	left	g4	stage ii	m0	n0	t2
TCGA-T9-A136I	83	male	left	g3	stage iii	mx	n2	t2
TCGA-T9-A137I	84	female	left	g4	stage ii	m0	n1	t2
TCGA-T9-A138I	66	male	right	g4	stage ii	m0	n0	t2
TCGA-T9-A139I	73	male	right	g3	stage ii	mx	n0	t3
