# Supplementary material for: NFIB promotes the migration and progression of kidney renal clear cell carcinoma by regulating PINK1 transcription
Source: PeerJ. 2021 Apr 23;9:e10848. doi: 10.7717/peerj.10848 (PMC8074839; doi:10.7717/peerj.10848)
Supplement: Supplemental Information 5 [file peerj-09-10848-s005.xls]

## Sheet: pathways
Category	Term	Count	%	PValue	Genes	List Total	Pop Hits	Pop Total	Fold Enrichment	Bonferroni	Benjamini	FDR
KEGG_PATHWAY	Ribosome	40	4.2061	3.67525e-17	RPL18, RPL19, MRPS15, RPL14, RPL13, MRPS11, RPL27A, RPL36, RPLP2, RPL38, RPS3, MRPL11, RPL30, MRPL12, MRPL16, RPL8, RPL3, FAU, RPL10, RPL5, RPL4, RPL10A, RPS20, MRPL35, RPSA, RPL27, RPS9, MRPL9, RPL24, MRPS7, RPS6, RPS5, RPS8, RPL29, RPS7, MRPL24, RPS19, RPL13A, RPS11, UBA52	418	136	6910	4.86209	9.70267e-15	9.70267e-15	4.81542e-14
KEGG_PATHWAY	Adhernens junction	8	0.84122	0.00249683	POLR2G, POLR2F, POLR2L, LOC101060521, POLR1E, POLR2K, POLR2C, POLR3E	418	32	6910	4.13278	0.483143	0.281072	3.22245
KEGG_PATHWAY	Tight junction	12	1.26183	0.00553548	CIITA, KIR2DL5A, PDIA3, RFX5, KIR2DS2, KIR2DS1, NFYC, HSPA4, CALR, RFXANK, KLRD1, KIR2DL4	418	76	6910	2.61017	0.769021	0.386439	7.01471
KEGG_PATHWAY	Leukocyte transendothelial migration	20	2.10305	0.00619547	RAD23B, GANAB, SEC24A, PDIA3, RRBP1, RAD23A, ERP29, PDIA6, UBQLN2, LMAN2, CALR, EDEM2, PRKCSH, HYOU1, HSP90B1, STT3A, RPN2, AMFR, DDOST, SEC24D	418	169	6910	1.95634	0.806154	0.336464	7.82001
KEGG_PATHWAY	ECM-receptor interaction	94	9.88433	0.00871504	CYP3A4, ATP5D, ATP6V0E1, SC5D, UQCRC1, HEXA, CYC1, ACOT2, ACOT1, QARS, PMVK, UXS1, PDHB, CDS2, ACOT8, IDS, TKFC, NDUFS8, ATP5L, ACAD8, RPN2, PDHA1, NDUFS3, PCYT2, DDOST, IMPDH2, AGPAT1, POLR1E, SUCLG1, HMBS, DPAGT1, PISD, DGUOK, CDS1, COQ7, LPIN1, PMM2, PIGO, COQ6, ALDH7A1, PGLS, FOLH1, NME3, DGAT1, PTGDS, ALDH1B1, SQLE, CYP2A6, FLAD1, AOC2, PCCB, GATB, PLA2G5, POLR2G, POLR2F, SORD, GANAB, AHCY, …	418	1228	6910	1.26541	0.900824	0.370085	10.8355
KEGG_PATHWAY	TGF-beta signaling pathway	21	2.2082	0.0115237	ATP5D, POLR2G, CLTA, NDUFA2, POLR2F, UQCRC1, POLR2L, NDUFB7, POLR2K, NDUFA7, COX8A, CYC1, POLR2C, TFAM, NDUFV1, SDHC, NDUFS8, SDHD, COX6A1, APAF1, NDUFS3	418	192	6910	1.80809	0.953108	0.399495	14.0894
KEGG_PATHWAY	Cell adhesion molecules(CAMs)	12	1.26183	0.0204182	UPF3A, PPP2R1A, SYMPK, PPP1CA, CLP1, DDX39B, CPSF7, PABPC1, PPP2R2B, CSTF1, CPSF1, PPP2R2A	418	91	6910	2.17993	0.995687	0.54069	23.6845
KEGG_PATHWAY	MAPK signaling pathway	15	1.57729	0.029094	DDX39B, SNU13, SNRPD2, PRPF3, WBP11, CDC5L, SF3B2, PRPF6, PRPF19, HNRNPA3, PPIE, SRSF8, SNRPB, SNRPF, PUF60	418	133	6910	1.86441	0.999588	0.622561	32.0809
KEGG_PATHWAY	Calcium signaling pathway	15	1.57729	0.029094	ATP5D, ATP6V0E1, NDUFA2, UQCRC1, NDUFB7, NDUFA7, COX8A, CYC1, SDHC, NDUFV1, NDUFS8, SDHD, COX6A1, ATP5L, NDUFS3	418	133	6910	1.86441	0.999588	0.622561	32.0809
KEGG_PATHWAY	Pathways in cancer	6	0.630915	0.0319011	SDHC, SUCLG1, SDHD, IDH3B, PDHA1, PDHB, PINK1	418	30	6910	3.30622	0.999808	0.613652	34.6093
KEGG_PATHWAY	Focal adhesion	11	1.15668	0.0358451	EIF6, TBL3, CSNK2A1, EMG1, SNU13, PINK1, GNL3L, NAT10, NOP56, FCF1, IMP4, NOP10	418	87	6910	2.09014	0.999935	0.618516	38.0149
KEGG_PATHWAY	Cytosolic DNA-sensing pathway	9	0.946372	0.0374748	MAVS, POLR2F, IFNA1, POLR2L, LOC101060521, POLR2K, IFNA14, IFNA13, POLR3E	418	64	6910	2.32469	0.999958	0.600156	39.3737
KEGG_PATHWAY	Dopaminergic synapse	14	1.47213	0.0444108	PPP2R1A, KIF5A, KIF5C, ARNTL, PPP1CA, GNG10, CALM3, GNAS, PPP2R2B, CAMK2A, AKT3, CALM2, PPP2R2A, CALM1	418	128	6910	1.80809	0.999994	0.631899	44.8547
KEGG_PATHWAY	Carbon metabolism	12	1.26183	0.0480216	PGLS, TKFC, SDHC, SUCLG1, SDHD, ENO2, IDH3B, CAT, PDHA1, PCCB, HADHA, PDHB	418	113	6910	1.75552	1	0.78386	65.5045
