# Supplementary material for: NFIB promotes the migration and progression of kidney renal clear cell carcinoma by regulating PINK1 transcription
Source: PeerJ. 2021 Apr 23;9:e10848. doi: 10.7717/peerj.10848 (PMC8074839; doi:10.7717/peerj.10848)
Supplement: Supplemental Information 6 [file peerj-09-10848-s006.xlsx]

## Sheet: Figure 1D
gene name	Sample Name	Ct-1	Ct(GAPDH)
NFIB	1	26.56	16.16
NFIB	1	26.32	15.82
NFIB	1	26.28	15.86
NFIB	2	25.2	16.38
NFIB	2	25.27	16.47
NFIB	2	24.87	16.79
NFIB	3	20.78	16.16
NFIB	3	20.88	15.82
NFIB	3	20.78	15.86

## Sheet: Figure 1G
gene name	Sample Name	Ct-1	Ct(GAPDH)
NFIB	1	34.2	24.97
NFIB	1	34.45	25.08
NFIB	1	34.32	25.19
NFIB	2	33.99	25.95
NFIB	2	33.55	25.86
NFIB	2	33.33	25.86
NFIB	3	34.2	26.36
NFIB	3	34.45	26.28
NFIB	3	34.32	26.33
NFIB	4	34.49	24.67
NFIB	4	34.71	24.63
NFIB	4	34.94	25.27
NFIB	5	34.01	27.24
NFIB	5	34.59	27.12
NFIB	5	34.85	27.17
NFIB	6	33.17	24.98
NFIB	6	33.51	24.7
NFIB	6	33.65	24.89
NFIB	7	33.17	24.83
NFIB	7	33.44	24.72
NFIB	7	33.72	24.73
NFIB	8	33.21	25.81
NFIB	8	33.72	25.7
NFIB	8	33.97	25.78
NFIB	9	33.35	25.55
NFIB	9	33.34	25.54
NFIB	9	33.14	25.29
NFIB	10	31.72	24.7
NFIB	10	31.75	24.63
NFIB	10	31.78	24.4
NFIB	11	33.85	25.25
NFIB	11	33.17	24.96
NFIB	11	33.17	25.08
NFIB	12	33.28	25.28
NFIB	12	33.18	25.22
NFIB	12	33.68	25.01
NFIB	13	31.28	25.27
NFIB	13	30.8	25.44
NFIB	13	31.01	24.95
NFIB	14	34.52	26.47
NFIB	14	34.99	26.21
NFIB	14	34.75	26.28
NFIB	15	34.92	25.95
NFIB	15	34.24	25.82
NFIB	15	34.8	25.78
NFIB	16	33.93	25.52
NFIB	16	33.9	25.43
NFIB	16	33.55	25.41
NFIB	17	34.16	24.59
NFIB	17	34.58	24.67
NFIB	17	34.37	24.67
NFIB	18	34.67	25.53
NFIB	18	34.16	26.1
NFIB	18	34.41	25.88
NFIB	19	34.29	26.16
NFIB	19	34.59	25.14
NFIB	19	34.67	26.45
NFIB	20	32.45	25.48
NFIB	20	32.78	25.41
NFIB	20	32.21	26.23
NFIB	21	32.94	25.42
NFIB	21	33.63	24.82
NFIB	21	32.25	24.84
NFIB	22	35.22	24.23
NFIB	22	35.2	24.19
NFIB	22	35.18	24.2
NFIB	23	33.91	25.8
NFIB	23	33.17	25.65
NFIB	23	33.64	25.69
NFIB	24		25.55
NFIB	24		25.3
NFIB	24		25.36
NFIB	25	34.85	25
NFIB	25	35.22	24.99
NFIB	25	34.49	25.04
NFIB	26	34.14	26.57
NFIB	26	34.24	26.5
NFIB	26	34.45	25.85
NFIB	27	35.26	26.71
NFIB	27	35.45	26.13
NFIB	27	35.22	26.01
NFIB	28	35.22	26.17
NFIB	28	35.45	25.85
NFIB	28	34	25.83
NFIB	29	30.13	25.08
NFIB	29	30.75	25.87
NFIB	29	30	25.24
NFIB	30	29.37	25.55
NFIB	30	29.41	25.11
NFIB	30	29.15	24.87
NFIB	31	34.45	25.93
NFIB	31	34.21	25.39
NFIB	31	34.26	25.23
NFIB	32	34.07	25.76
NFIB	32	34.66	25.75
NFIB	32	34.2	25.05
NFIB	33	33.53	26.1
NFIB	33	33.54	26.54
NFIB	33	33.64	26.62
NFIB	34	34.92	26.8
NFIB	34	34.35	26.28
NFIB	34	34.1	26.03
NFIB	35	33.91	27.14
NFIB	35	33.01	27.67
NFIB	35	33.98	27.21
NFIB	36	32.74	24.95
NFIB	36	32.5	24.45
NFIB	36	32.12	25.04
NFIB	37	32.36	25.9
NFIB	37	32.66	25.02
NFIB	37	32.51	24.41
NFIB	38	34.24	23.44
NFIB	38	34.43	23.57
NFIB	38	34.32	23.07
NFIB	39	34.63	24.86
NFIB	39	35.07	24.82
NFIB	39	34.85	25.06
NFIB	40	33.51	24.7
NFIB	40	34.15	24.9
NFIB	40	33.83	25.06
NFIB	41	34.34	24.63
NFIB	41	34.78	24.68
NFIB	41	34.26	24.59
NFIB	42	34.98	24.56
NFIB	42	34.6	25.42
NFIB	42	35.36	25.69
NFIB	43	33.91	24.78
NFIB	43	33.67	25.09
NFIB	43	33.43	25.11
NFIB	44	33.53	25.79
NFIB	44	33.2	26.1
NFIB	44	32.87	26.05
NFIB	45	34.35	26.77
NFIB	45	34.21	26.32
NFIB	45	34.65	26.01
NFIB	46	34.55	25.27
NFIB	46	34.96	24.96
NFIB	46	34.14	24.5
NFIB	47	35	27.76
NFIB	47	35.23	27.28
NFIB	47	35.51	27.98
NFIB	48	32.12	24.09
NFIB	48	32.34	24.72
NFIB	48	32.99	24.78
NFIB	49		24.37
NFIB	49		24.29
NFIB	49		24.6
NFIB	50	33.84	26.3
NFIB	50	33.85	26.18
NFIB	50	33.86	26.2
NFIB	51		23.99
NFIB	51		23.91
NFIB	51		23.97
NFIB	52	34.29	26.06
NFIB	52	34.59	25.27
NFIB	52	34.67	25.28
NFIB	53	32.45	24.76
NFIB	53	32.78	24.8
NFIB	53	32.21	24.5
NFIB	54	32.94	24.96
NFIB	54	33.63	24.82
NFIB	54	32.25	24.91
NFIB	55	35.22	22.92
NFIB	55	35.2	23
NFIB	55	35.18	22.9
NFIB	56	33.91	25.34
NFIB	56	33.17	25.52
NFIB	56	33.64	25.07
NFIB	57		25.93
NFIB	57		25.25
NFIB	57		25.16
NFIB	58	34.85	28.35
NFIB	58	35.22	28.27
NFIB	58	34.49	28.04
NFIB	59	34.14	24.89
NFIB	59	34.24	24.22
NFIB	59	34.45	23.92
NFIB	60		25.74
NFIB	60		25.62
NFIB	60		25.52

## Sheet: Figure 2A
gene name	Sample Name	Ct-1	Ct(GAPDH)
NFIB	1	31.72	14.7
NFIB	1	31.75	14.63
NFIB	1	31.78	14.4
NFIB	2	23.85	15.25
NFIB	2	23.17	14.96
NFIB	2	23.17	15.08
NFIB	3	33.28	15.28
NFIB	3	33.18	15.22
NFIB	3	33.68	15.01
NFIB	4	21.28	15.27
NFIB	4	20.8	15.44
NFIB	4	21.01	14.95

## Sheet: Figure 2F
gene name	Sample Name	Ct-1	Ct(GAPDH)
NFIB	1	24.75	16.28
NFIB	1	24.92	15.95
NFIB	1	24.24	15.82
NFIB	2	34.8	15.78
NFIB	2	33.93	15.52
NFIB	2	33.9	15.43
NFIB	3	23.55	15.41
NFIB	3	24.16	14.59
NFIB	3	24.58	14.67
NFIB	4	34.37	14.67
NFIB	4	34.67	15.53
NFIB	4	34.16	16.1

## Sheet: Figure 3C
gene name	Sample Name	Ct-1	Ct(GAPDH)
PINK1	1	29.29	16.16
PINK1	1	29.59	15.14
PINK1	1	29.67	16.45
PINK1	2	22.45	15.48
PINK1	2	22.78	15.41
PINK1	2	22.21	16.23
PINK1	3	32.94	15.42
PINK1	3	33.63	14.82
PINK1	3	32.25	14.84
PINK1	4	25.22	14.23
PINK1	4	25.2	14.19
PINK1	4	25	14.23

## Sheet: Figure 3E
gene name	Sample Name	Ct-1	Ct(GAPDH)
PINK1	1	22.74	14.95
PINK1	1	22.5	14.45
PINK1	1	22.12	15.04
PINK1	2	29.36	15.9
PINK1	2	29.66	15.02
PINK1	2	29.51	14.41
PINK1	3	24.24	13.44
PINK1	3	24.43	13.57
PINK1	3	24.32	13.07
PINK1	4	28.63	14.86
PINK1	4	28.07	14.82
PINK1	4	28.85	15.06

## Sheet: Figure 4A
gene name	Sample Name	Ct-1	Ct(GAPDH)
NFIB	1	24.98	14.56
NFIB	1	24.6	15.42
NFIB	1	25.36	15.69
PINK1	1	23.91	14.78
PINK1	1	23.67	15.09
PINK1	1	23.43	15.11
NFIB	2	23.53	15.79
NFIB	2	23.2	16.1
NFIB	2	22.87	16.05
PINK1	2	29.35	16.77
PINK1	2	29.21	16.32
PINK1	2	29.65	16.01

## Sheet: Figure 4G
gene name	Sample Name	Ct-1
Input	1	25.34
Input	1	25.29
Input	1	25.14
IgG	1	32.3
IgG	1	32.64
IgG	1	32.06
NFIB	1	32.24
NFIB	1	32.19
NFIB	1	32.75
Input	2	25.5
Input	2	25.55
Input	2	25.22
IgG	2	33.44
IgG	2	32.66
IgG	2	33.33
NFIB	2	15.5
NFIB	2	15.55
NFIB	2	15.22
Input	3	25.77
Input	3	25.56
Input	3	25.54
IgG	3	32.14
IgG	3	32.33
IgG	3	31.98
NFIB	3	32.19
NFIB	3	32.32
NFIB	3	32.85
